# Supplementary material for: Circular synthesized CRISPR/Cas gRNAs for functional interrogations in the coding and noncoding genome
Source: eLife journal article supplement (doi:10.7554/elife.42549), 2019-03-06
Supplement: supp [file elife-42549-supp-v1.zip]

Archive with 32 entries (32 files):
- elife_poa_e42549_Supplementary_File_8.xlsx
- elife_poa_e42549_Supplementary_File_12.xlsx
- elife_poa_e42549_Figure_1_figure_supplement_1.pdf
- elife_poa_e42549_Figure_3_figure_supplement_3.pdf
- elife_poa_e42549_Supplementary_File_4.xlsx
- elife_poa_e42549_Supplementary_File_9.xlsx
- elife_poa_e42549_Supplementary_File_20.xlsx
- elife_poa_e42549_Supplementary_File_5.xlsx
- elife_poa_e42549_Supplementary_File_3.xlsx
- elife_poa_e42549_Figure_3_figure_supplement_2.pdf
- elife_poa_e42549_Supplementary_File_6.xlsx
- elife_poa_e42549_Supplementary_File_10.xlsx
- elife_poa_e42549_Supplementary_File_17.xlsx
- elife_poa_e42549_Supplementary_File_11.xlsx
- elife_poa_e42549_Supplementary_File_22.xlsx
- elife_poa_e42549_Supplementary_File_7.xlsx
- elife_poa_e42549_Transparent_Reporting_File.pdf
- elife_poa_e42549_Supplementary_File_16.xlsx
- elife_poa_e42549_Supplementary_File_23.xlsx
- elife_poa_e42549_Supplementary_File_13.xlsx
- elife_poa_e42549_Supplementary_File_2.xlsx
- elife_poa_e42549_Supplementary_File_21.xlsx
- elife_poa_e42549_Figure_2_figure_supplement_1.pdf
- elife_poa_e42549_Figure_3_figure_supplement_1.pdf
- elife_poa_e42549_Supplementary_File_19.xlsx
- elife_poa_e42549_Supplementary_File_15.xlsx
- elife_poa_e42549_Figure_5_figure_supplement_1.pdf
- elife_poa_e42549_Supplementary_File_18.xlsx
- elife_poa_e42549_Figure_6_figure_supplement_1.pdf
- elife_poa_e42549_Figure_5_figure_supplement_2.pdf
- elife_poa_e42549_Supplementary_File_1.xlsx
- elife_poa_e42549_Supplementary_File_14.xlsx
