# Supplementary material for: Circular synthesized CRISPR/Cas gRNAs for functional interrogations in the coding and noncoding genome
Source: eLife journal article supplement (doi:10.7554/elife.42549), 2019-03-06
Supplement: supp [file elife-42549-supp-v1.zip › elife_poa_e42549_Supplementary_File_1.xlsx]

## Sheet: Sheet1
guide sequence	name	reads
aggtgaagttcgagggcgac	GFP1	1778482
ccctgagcaaagaccccaac	GFP2	938752
tcgtgaccaccctgacctac	GFP3	1052249
cggcgcgggtcttgtagttg	GFP4	1105307
ttcagctcgatgcggttcac	GFP5	1381930
cggtgaacagctcctcgccc	GFP6	676178
	average per guide	1155483
	total read counts	6932898
