# Supplementary material for: Circular synthesized CRISPR/Cas gRNAs for functional interrogations in the coding and noncoding genome
Source: eLife journal article supplement (doi:10.7554/elife.42549), 2019-03-06
Supplement: supp [file elife-42549-supp-v1.zip › elife_poa_e42549_Supplementary_File_2.xlsx]

## Sheet: Sheet1
Sup Table 2 – NGS 4-9N counts	total reads	diversity	average per guide
4N	28695174	256	112091
5N	27466489	1024	26822.7
6N	24278791	4096	5927.44
7N	25531110	16384	1558.3
8N	15066531	65536	229.897
9N	16038590	262144	61.1824
