# Supplementary material for: Circular synthesized CRISPR/Cas gRNAs for functional interrogations in the coding and noncoding genome
Source: eLife journal article supplement (doi:10.7554/elife.42549), 2019-03-06
Supplement: supp [file elife-42549-supp-v1.zip › elife_poa_e42549_Supplementary_File_3.xlsx]

## Sheet: Sheet1
seqeunce	name	count
TCAACAGTCCAGAGTATCAG	ATXN3	33835
CTGTCATCCATATTTCCAGA	ATXN3	15650
CGAGTGTTAGAAGCAAATGA	ATXN3	8525
TGGAACATCAGACCAAGATG	ATXN3L	118797
ATCGAGCCAAGAAATTTGCA	ATXN3L	53942
TCAGAAAACATGGATGATAC	ATXN3L	23193
GTCCATCAAGACTAGCAGCG	BAP1	119677
TCTACCCCATTGACCATGGT	BAP1	91554
CACGGACGTATCATCCACCA	BAP1	26825
GAGCGTGGTTGAGACAAACG	BRCC3	34704
AGTAATGGGGCTGTGCATAG	BRCC3	18444
GCTCTGGAGAAATTTCTACT	BRCC3	12603
AGCAGCCTGAGCATTTACTC	COPS5	22840
GATGGGTCTGATGCTAGGAA	COPS5	9625
GGGTGGTATCATAGCCACCC	COPS5	4627
GGTTCAACTTCAGAAAGAGG	COPS6	18368
CAAGGAATATTATTACACCA	COPS6	11728
TGGGTTGGTATACCACAGGG	COPS6	7354
AAAGGCCTCCAAATAGACGT	CYLD	200715
ATATTCAAGATCGTTCTGTG	CYLD	37682
TGAGACTGAATGGTAAAGAG	CYLD	12959
TCTACCATGAGAAACAGCGC	JOSD1	126021
TGAAGCCCATGACGTTAGTG	JOSD1	34260
GGACAGCAATGCCTTCACCC	JOSD1	20506
TCACCTCTTGCAGATCTCAT	JOSD2	45504
CTGCCGTTCGTGGTACACGG	JOSD2	26924
AGGATCAGCCCCAGTACCTG	JOSD2	23068
AGTCTGACCTGGCCAAGTCG	MPND	123570
CTGACACGGAGTGAGGTCGT	MPND	119482
ACAAGAGTCGGAGACCACTG	MPND	12296
CAAGCTCAGAAATTACACTG	MYSM1	23574
GAGATGTTAATTGTATTGGA	MYSM1	8240
ATGGTGTTATCCAAGGTCCA	MYSM1	2112
CAAACAGTCTAAGGCGACGA	Non-Targeting Control	85953
AAATAATATGCATCTCTCGA	Non-Targeting Control	62221
AAATTGGCTTTCGTTCGTGC	Non-Targeting Control	62034
TTAACTCGAACGCTCGAAAG	Non-Targeting Control	54994
ATAGCCGCCGCTCATTACTT	Non-Targeting Control	50615
TTGTACGGTACTGGCTTTGT	Non-Targeting Control	48711
ATCTGCCATGGCGTCCTGGC	Non-Targeting Control	44887
GTCCTCATCCGGTCAGGCTG	Non-Targeting Control	43397
TCGCGCTTGGGTTATACGCT	Non-Targeting Control	41230
GAACTGGCAAACAGGCGTGG	Non-Targeting Control	38386
CACTGCAGTATTCGTGGCCT	Non-Targeting Control	38261
AAGCCATTGTATAACTCCAG	Non-Targeting Control	37439
AAGAATTAGGCACGGTTACT	Non-Targeting Control	36012
TAGACAACCGCGGAGAATGC	Non-Targeting Control	30878
CAGGTTTGCACGCATAGCTA	Non-Targeting Control	29083
AGTTCCCAGAAATATATTGC	Non-Targeting Control	28567
CCAAAAAGATGAATATCTCG	Non-Targeting Control	26179
TGCCGTTAGCATGCGATCCC	Non-Targeting Control	25570
CGGAGTTAACCTGGAACCTT	Non-Targeting Control	25314
TCCGGAGGCTCAAACCAAGT	Non-Targeting Control	24772
ATCGTTGCTGACAGGATCTA	Non-Targeting Control	22891
TTATGTGAGCACGCCATTAC	Non-Targeting Control	22306
GTGCGTGAGTATTAACGCTC	Non-Targeting Control	22303
CATTAAACCTTGCCCCACAA	Non-Targeting Control	18003
CTATATTGTCGCGCAGTGGA	Non-Targeting Control	17452
TAAAGCAGAAGAATATACAG	Non-Targeting Control	15694
GGACGCACCATTCCGGGTGA	Non-Targeting Control	12931
GGTGCGGTCTGCTTGTAGAT	Non-Targeting Control	12373
GTTCCCCGGGAAGTCTATGC	Non-Targeting Control	12312
TGACGCTCCACGTCCGGACC	Non-Targeting Control	11582
GAGTCGAAGATGGTCTAGGA	Non-Targeting Control	11352
CGCTAGGTTATTTCGTGGCC	Non-Targeting Control	8207
GTTGATCGAAAATGGGAGAA	Non-Targeting Control	7806
CGACAACGTGCAGGTGTATC	Non-Targeting Control	6413
TGTGAAAGTTTATGGTGTTA	Non-Targeting Control	6234
GCGAATGCCTGAAAGTATAA	Non-Targeting Control	5209
GCAGGACCGAATTCAGCAAG	OTUB1	72117
CAGACACAGCCTTGAACCTG	OTUB1	39400
GTAGACCACAAGGTAGTCGG	OTUB1	26266
AGTGCCGGAAGAAGTCTGCT	OTUB2	44062
CGCCATCCGCAAGACCAAAG	OTUB2	33008
GATTTACCGGAGGAAAATCG	OTUB2	31153
GCTCTTCGCCCCACGGACCG	OTUD1	45907
GCGGTGGACGTGTAGTGCGG	OTUD1	44999
CTCCGCCGCACTACTCGGGG	OTUD1	19692
AGCACTACGACAGTGTTCGG	OTUD3	34067
GTGACCTACCTGCCACAAAG	OTUD3	24755
GCTCTTGGTGATCAATTGGA	OTUD3	9213
TCTTCAATACAGGAATGGGT	OTUD4	53257
TTACCTGTACATAAGAGAAA	OTUD4	8911
GAACAGAGAGAAATTTGAAG	OTUD4	8087
GGTTGTGCGAAAGCATTGCA	OTUD5	53549
GAATGCCATAAAAACATCGG	OTUD5	26400
CGGCGCAGGCTACAACAGTG	OTUD5	17799
TGCGCCGCCACCAACGCGAG	OTUD6A	58598
CCAAGACGTGGCCCGCATGG	OTUD6A	31096
GGCCGGCTTCAAGCGCGAGG	OTUD6A	23021
AAAGGATTGTGCTCTGACTG	OTUD6B	48438
TGCTTGAGAATCAGCCACCT	OTUD6B	25392
GCGCTAGAAGAAACCTGCAC	OTUD6B	14459
TATGGGCTAGGACAAAAACG	OTUD7A	28483
TCTCTGTTCCATGGACACAA	OTUD7A	8410
CAGAAAAGCGGCTTTCCCGG	OTUD7A	4810
AAGCGTTGAAAAGGCGCTGG	OTUD7B	56908
TAGGAGGCCCATAGTCGTCG	OTUD7B	36238
TAGTGTAATTCTGTCCCTAG	OTUD7B	8548
ACCACGGACTCGCCGTATGG	OTULIN	60387
ATTGCTTATACATGAAAGAG	OTULIN	20792
TGAACTATTCACAAATGAGG	OTULIN	14439
GTTCCACCTTAAAAGTACGG	PAN2	23993
CTCAAGTATATGGCCCGTGG	PAN2	22291
CTGTGAAAAGTACCAGCCCA	PAN2	13922
AAACACATCAATCACTCTGA	PSMD14	128201
AGCCTTGTCGGAGAGAGCTG	PSMD14	44469
TACCAACCAACAACCATCTC	PSMD14	40318
AATCGATGGATTGCGCCATG	STAMBP	71855
AAGGCCAGCTAAGCCACCTG	STAMBP	42956
CCAGAGCGGAAGTACCGACG	STAMBP	24596
CCAGACCTAAAGTAACGTCG	STAMBPL1	66528
AAGAAGCAAGAGTTAGCCCG	STAMBPL1	58136
GTTAAGGCCCTGTTTACAGG	STAMBPL1	9866
CCACTTGTTAACAGAGACCG	TNFAIP3	37234
TATGCCATGAGTGCTCAGAG	TNFAIP3	24732
CTTGTGGCGCTGAAAACGAA	TNFAIP3	13506
AATCGGACTTATTCACGCAG	UCHL1	82621
ACAGGCAGCCCATGATGCCG	UCHL1	56039
CGCCCTACCTGGGCCGTGAG	UCHL1	19951
GGATCCTGAACTCCTTAGCA	UCHL3	31141
GCCGCTGGAGGCCAATCCCG	UCHL3	18062
GGTCTCATGAGTAACTCGGA	UCHL3	8142
TTTATTATTTCAGGTTGCCG	UCHL5	35676
GTTACTGAACTGTACCCACC	UCHL5	17382
GAATTAGATGGATTAAGAGA	UCHL5	8144
GGCGACTGCTTAACACACTG	USP1	22278
TGGTATTAACAGCATAGAGA	USP1	9927
GAAGTTAAACCCATAAACAA	USP1	8127
ACTGACCAAAATCAGCCCCG	USP10	70037
AAATAGCTGTAATATCCAGG	USP10	51163
ACAACCGAGAATAAATTCAG	USP10	43298
GGTCTCCATGATGATCAACT	USP11	21019
TGATAGGCAGTGGAACACTG	USP11	18073
GTGGGCGAGAACGTCCACTG	USP11	10448
CAGCACACCAGACCCAACGT	USP12	227261
TTGCGTATAAGAGTCAACCT	USP12	26412
CTTGTGATGAACTTCTTAGG	USP12	16893
CCTGAAAAGACATGTGCGAG	USP13	26038
CTGGAGCATTACAGAGACAT	USP13	24817
GCCAGGACTAAGTTAGGACA	USP13	13057
TACAGGATGCTAATGAATGT	USP14	60466
GCCTGCCAGACAGAAAGTTA	USP14	18644
TCATGTAACAAGTGTTACCA	USP14	13233
CCAAGTTACTTAGGCCACAG	USP15	20968
TCTAACTAAGTAAACTTCCA	USP15	10878
AAGGTGTTCCTTAAGTGACT	USP15	4790
AAGGAAAGATTCATGAACCA	USP16	25728
TTAAGACACAGCCAAACTGA	USP16	19876
GTGTTACGTATGTGATAATG	USP16	9733
TCAAAGCTCAAGAAGTCCAG	USP17L1	19984
GCAGGTAGATCATCACTGCA	USP17L1	19060
GACATGGCCAGGACTGTGGA	USP17L1	15595
TCTCAGGGAGAGAAGTACGC	USP17L10	44813
TGACATGGCCAGGAATGTGG	USP17L10	26906
GGTCTCCTGCTACTCAGAGG	USP17L10	19697
TGCCAACTACATGCTGTCCC	USP17L11	17218
TTGGCTGCTGGCTTCCATAG	USP17L11	12531
GTGTTCGTCTGAGACATGTA	USP17L11	1565
TACATGTCTCAGCCGAACAC	USP17L12	45678
GAGTAAAGTTAACATCTTGG	USP17L12	21374
GCAGGTCTCCTGTTACTCAG	USP17L12	13220
CAGGAACCAAATCATCACAG	USP17L13	15381
CTGTGATGATTTGGTTCCTG	USP17L13	12896
ATGAGGGTGGTGTCCTTAGA	USP17L13	10438
CAAACGTGTCATCGTCACAA	USP17L15	35926
ACATGTATAGCTTCATGTCA	USP17L15	13749
GACAGAAGTGATGCTAGAGG	USP17L15	13735
AATCTTGTTGCCTGTCACAT	USP17L17	93643
TCAAAGCTCAAGAAGGCCAA	USP17L17	15169
GCATAGAGGACATAGACAAG	USP17L17	14433
GAGGACGACTCACTCTACTT	USP17L18	36219
CCTTGTTCCAGTCGACATGG	USP17L18	30350
GACGACTCACTCTACTTGGG	USP17L18	27999
ACACGTTTGAGAGTGCTCCC	USP17L19	41805
TACATGTCTCAGACGAACAC	USP17L19	26296
CCTGTGAGGGCTGGATGACG	USP17L19	23079
TGACATGACCAGGACTGTGG	USP17L2	52743
ACACGGGCCTCAGATGAGAG	USP17L2	35250
ATTGCGGTCTTTGTCTCCAG	USP17L2	11864
GATGCTAGAGGCGGTGACCT	USP17L20	24047
CCAAGTGCTCGTCCAACTCG	USP17L20	23079
CGTCCAACTCGGGGGCCTGG	USP17L20	14377
AAAGTTAACATCTTGGAGGC	USP17L21	87342
AACTTTACTCACCTCTGCCA	USP17L21	69771
GAGTAACAGGAGACCTGCTG	USP17L21	47849
AGTGAACATGAGAAATTCAT	USP17L22	44779
TACATGTCTCAGCAGAACAC	USP17L22	35702
TCAAACGTGTCATCGTCACA	USP17L22	23072
GACCTGCTGCGGTGGGGGCT	USP17L24	46934
TCTGAGCTGCCTGGATATCC	USP17L24	15471
AGCAGGTATTTCCCATATTC	USP17L24	13909
AAGAGATTCTCCGATGTCAC	USP17L25	51352
TGAATTTCTCATGTTCACTG	USP17L25	18480
GAGGGCTGGATGACGTGGCC	USP17L25	16300
TAGCAGGAGACCTGCTGCGG	USP17L26	10464
TCCAGGGCGATGTCCAGGTA	USP17L26	8211
TCCAAATATTTGGTGGATGA	USP17L26	2595
AGCCCAGCCCCCACCGCAGC	USP17L27	75342
CCCTTACCTGGACATCGCCC	USP17L27	72975
TTGCCAACTACATGCTGTCC	USP17L27	31268
TATGCAAGCTCACATCACAC	USP17L28	25007
ACACGGGTCTCACATGAGAG	USP17L28	20796
GCATAGAGGACATAGACGAG	USP17L28	17040
CTACCTGCTTGTGCCCGGGA	USP17L29	24638
TGACGTGGCCAGGATTGTGG	USP17L29	17761
ATTGTGGTGTTTGTCTCCAG	USP17L29	923
AACTTTACACACTTCTGCCA	USP17L3	58877
CTACCTGCTTGTGGCCGGGA	USP17L3	21259
GCCAGAAGCCAATGCCTGTG	USP17L3	15104
TGTTTGTCTCCAGAGGGCGC	USP17L30	92276
CGTGGACCAGCACAGCATAG	USP17L30	33641
CCAGCAGCCAATGCCTGTGA	USP17L30	16392
AGTGTGTAAAGTTAACGTGT	USP17L4	75346
TATGCAAGCTCACATCACAT	USP17L4	55515
GCTGGGTGGAGTTGTCACGA	USP17L4	18641
TAGACGAGAGGTCCTGTGTT	USP17L5	26276
GCCAGCAGCCAATGCCTGTG	USP17L5	17284
GTGTAAAGTTAACGTCTTGG	USP17L5	16316
ACACGTTTGAGAGTCCTCCC	USP17L7	43751
CAAAGGTGTCTGAAACGCCG	USP17L7	41674
CTTCCATAGAGGTGAGCAGG	USP17L7	25430
GTACAGAGCATGCAGCACTT	USP17L8	39190
GGAGAGAATGCCTATCCTTG	USP17L8	21088
ACACGGGTCTCAGATGAGAG	USP17L8	20651
AAGATCTGCCGGGGACTGCG	USP18	153835
ATGACCATGAGGGTAGTCCC	USP18	35399
TCAGGTGTTCGTAATGAATG	USP18	469
GAGGAATGACTCTTTCATCG	USP19	35361
CAGATACAGACTGTGTGGTG	USP19	22492
GAGCGAGGCGGGCATAAGTG	USP19	13986
GCTGAGACCCGACATCACTG	USP2	47163
ATAGCTACCGGATAGACCCC	USP2	27960
TCTGGATGGGCTCCATAACG	USP2	16332
GTCGACCTACCAATTGGACA	USP20	63658
CTCACCCTTTAACTCATCAG	USP20	30046
CCTTTCTTGAGCACGTACGA	USP20	28708
AAGACAGCTCGGAATCGAGT	USP21	101268
AGGACCGGGCGGATATCATG	USP21	33985
GAGAAGGGACTTCCGGCAAG	USP21	12124
CCTCGAACTGCACCATAGGT	USP22	88388
GCCATTGATCTGATGTACGG	USP22	24685
TGGGGCTCTGCATCTCACAG	USP22	19706
AGACACGGACAACTGTCGGT	USP24	63409
GTTTAATCCTACCTGTACCA	USP24	18801
TCTCCAACTAGTATTATGAG	USP24	11371
TGTGATGGTATGGAACCACT	USP25	20614
GGCACCAAGGCACATAACGG	USP25	20377
GAGACTGAAAGATTACCTCA	USP25	13662
GGACAGAGTTCATCAAAACG	USP26	30802
ATAGTGACGGTTACACAAAG	USP26	19130
GAAGCCTAAAAGTGAATTTG	USP26	12648
TAAACCGATCGTAAAGCTGG	USP27X	121888
ACTGCTTGCGGAGGTTTACG	USP27X	44628
CGGGACTCGGCATCTCACAT	USP27X	36439
AAAATGTTGGCAATACATGT	USP28	146121
AGAAGTGGAAGCCCTATCTG	USP28	24455
CTGAAGAGGATACTGGCCGA	USP28	22704
ACTCACTCAAGGTGTCCCAT	USP29	57449
TACATTTAGTAGGCTCTCCA	USP29	12232
TGGTTCAACGGGTAGAACCA	USP29	9950
CCCATTCCTTAACTCCACGG	USP3	30743
CTACACTTGGAACTTCAGGG	USP3	16866
GTTGTCACGGCTATATTCGG	USP3	14020
TAAATCAGTACATACCCATG	USP30	25267
TGTGTGTGACAACTGTACAA	USP30	9539
AGGTGTTCCCTAAATTAACA	USP30	4596
CAAACCTGAATGCAAACCGT	USP31	230710
GGCAACGCCAGGCATCATCG	USP31	51552
GACTTATTACCTGATCAGTG	USP31	26023
GAATGCACATGACACCACAA	USP32	29428
GGAAAGAATGCTCCACGTGG	USP32	23425
CTGTAGTATTCACGTAACTG	USP32	21496
AACAGTCGACTTAAACAACC	USP33	84503
ATAGTCAAAGCAGGATCATG	USP33	25104
TCATCAAATACGGCAACCAG	USP33	19178
GTCTTGTATCACACGAACTG	USP34	35934
TCATATACCACGATTAACAG	USP34	18907
TTGTATCTTTGGGTGCACCA	USP34	16856
AGAACTCGGCGAAGACGTCG	USP35	88810
TCAAGGAGGACTCGAACTCG	USP35	61057
CATCCATGAGCTCCAATGGG	USP35	35684
CAGGTTGGATCGTCAAACGC	USP36	63619
GAGCACACGTATGAGAGCTG	USP36	60754
GATCTGGAATCACACTCGGG	USP36	10581
AGGGTTGCTAGAAAATCGGT	USP37	49384
AATGTGGTGCTTCGACCCAG	USP37	33865
ACTCCAAATTAGTAATAACA	USP37	18847
GCTGATTATGAGCTGTCCGT	USP38	121486
GAAGCCTCAAAGAATATCCG	USP38	25904
TCTCTATGAACCTATTCTGG	USP38	15184
GAACATCAAACGTCCTCCAG	USP39	58582
ACTGCCTGAAGCATCTCATG	USP39	37520
AGGCGTGAGACTTCAAACCC	USP39	21520
GAAATGGCAACTCAGCACAT	USP4	55634
TCAACAGAGACAACCCTCTG	USP4	29084
CAGCTGGGACATGTACAATG	USP4	14846
GAAAACAGCATGGACCACTG	USP40	86027
CATGGTACAGACGATAGATG	USP40	17996
TCGAGCTAATCCAAGATATG	USP40	11967
AAATATCTGACAAACAAGAG	USP42	58311
GGACGCAAAGGGGATGATCG	USP42	47998
TCTCATTTATAGGCTAGCAA	USP42	14763
CACACCACTGACCTGTACAG	USP43	82326
AAGTACGGCTCTCAGTTCCA	USP43	33756
CTGCAAGGTGGGCATTACAC	USP43	18899
ATCACTGCACAACTCGTAGT	USP44	100142
TGGTTTGAACAATCACCCAT	USP44	28949
TATTGGCCTTCGTTTAACTG	USP44	20915
AATGAATGGATCTTTCACCG	USP45	57210
GACGTGACTCAGAATTCATG	USP45	20552
AGATTAATTATAATACAATG	USP45	12701
GTTCATATACCTTAGACAGT	USP46	82360
TGGCAACATGAACGAACCTG	USP46	70295
TGTATGCCAACACATTCTCC	USP46	23149
CTTGGCTGGACCCATAAGGT	USP47	89544
TGATCGAATGACATTTCCCG	USP47	43282
CCATAAATGAGAGTCTGCAA	USP47	16045
TGAGATGCGTAAGCAAAGTG	USP48	33943
CTGGCGCCAACTCCGCAAGG	USP48	31173
CAGACACGTAAACCCAAGTG	USP48	31076
CACCAAACAGGTCTTAAAGG	USP49	25915
GGCGGCGCGAGGTGAAACGG	USP49	23457
CGTGCTCAATGATAACCCAG	USP49	17696
ATCCTGGGTAGGGTCCGTCG	USP5	51154
GGAGAAGTTTGAATTAGACG	USP5	22896
ATGGATGCAGCCCTTAACAA	USP5	19561
CCTATCTGATGACAGACATG	USP50	20874
AGGGAGCATTCATATTTGGA	USP50	11774
GTGAGAAAGTATTCCACCAG	USP50	3085
CACAGACCAGACACAAGCTG	USP51	74611
TTGATGAGAAACATCTGTTG	USP51	29605
TCCATGCAGAACATTTAGCA	USP51	9816
ACTGACCACAGACTCATGGT	USP54	114901
AAGGTTTACCTAAAGCACCA	USP54	56320
GTGGAGCATTCATCAACACA	USP54	13603
CCAACGGACCTGGATATAGG	USP6	41719
TATACTCCGAATAGGCCAGG	USP6	29278
TCTCCGGAACCTGATTGACG	USP6	29084
AGATGTATGATCCCAAAACG	USP7	48786
GGCAACCTTTCAGTTCACTG	USP7	25296
GGCAGTAGAACAGCTCGATG	USP7	20622
ATGAAGGAGCCATTTCCGGT	USP8	33443
GTATTTCATATATAGTACAT	USP8	17239
TGAAGTCCGGAAAAAACTTG	USP8	13328
TCATACTATACTCATCGACA	USP9X	46086
ACAAGTGCTATATCTAACAG	USP9X	19840
TCATGGCGATAAAACACATG	USP9X	11325
TAACAATACTCATCGCCTAG	USP9Y	52597
TGGTACAGACCCCATAACAC	USP9Y	16882
TGATGGTCCCAATCTAGAGG	USP9Y	9914
GTGTAGCACTACGTCCGGGT	VCPIP1	47851
CAGTCTGATGCAATATAGTG	VCPIP1	12407
CCCCTTGGTAGGCATAAAAG	VCPIP1	5750
GCGGAGCCGCCACATCGTGT	YOD1	37827
AGTGTGTACTATGTCGTCGA	YOD1	26456
GAGGATTCGCTGACCGCCGG	YOD1	23434
CAGCTCCCTCTAGTCCCGCG	ZC3H12A	62762
GGAGTGGAAGCGCTTCATCG	ZC3H12A	26623
CAGGACGCTGTGGATCTCCG	ZC3H12A	25071
TCAGTTCTACAAGCTACCTG	ZRANB1	25010
CAGCAAGCGTACTTCATCTG	ZRANB1	21736
GAGTCCCGCTTCGTAGCAGG	ZRANB1	18482
