# Supplementary material for: Circular synthesized CRISPR/Cas gRNAs for functional interrogations in the coding and noncoding genome
Source: eLife journal article supplement (doi:10.7554/elife.42549), 2019-03-06
Supplement: supp [file elife-42549-supp-v1.zip › elife_poa_e42549_Supplementary_File_4.xlsx]

## Sheet: Sheet1
gene	R1_T0	R1_T11	R1_T21	Norm-R1-T0	Norm-R1-T11	Norm-R1-T21	R2_T0	R2_T11	R2_T21	Norm-R2-T0	Norm-R2-T11	Norm-R2-T21
USP28	145810	78698	2704319	0.0113942	0.0326913	0.106048	296508	979829	411430	0.0113174	0.0374798	0.0935884
BRCC3	110561	33517	499590	0.00863967	0.013923	0.019591	227947	423729	100943	0.00870053	0.0162082	0.0229616
USP34	111944	33203	558510	0.00874775	0.0137926	0.0219015	225616	306332	67851	0.00861156	0.0117176	0.0154341
USP46	106653	25458	391088	0.00833429	0.0105753	0.0153362	222797	262866	54848	0.00850396	0.010055	0.0124763
USP9Y	86325	27262	288590	0.00674578	0.0113247	0.0113168	177138	323035	41063	0.0067612	0.0123565	0.00934065
USP17L13	66088	22280	288603	0.00516438	0.00925514	0.0113173	218346	110753	40721	0.00833407	0.00423646	0.00926285
USP14	141106	34391	395602	0.0110266	0.0142861	0.0155132	284184	378243	73359	0.010847	0.0144683	0.0166871
USP11	112850	26463	360293	0.00881854	0.0109928	0.0141286	235230	294047	52673	0.00897852	0.0112477	0.0119816
USP18	103081	27727	234430	0.00805516	0.0115178	0.00919297	211193	320048	62523	0.00806105	0.0122423	0.0142222
MINDY4B	92734	27150	295104	0.0072466	0.0112781	0.0115722	191917	350421	41873	0.0073253	0.0134041	0.0095249
ATXN3L	104966	30397	320636	0.00820246	0.012627	0.0125735	212065	256474	45686	0.00809433	0.00981049	0.0103922
USP17L7	173323	47965	509847	0.0135441	0.0199247	0.0199932	350237	560247	78832	0.0133682	0.0214302	0.017932
USP17L1	113841	28744	316710	0.00889598	0.0119403	0.0124195	233393	328515	52546	0.0089084	0.0125662	0.0119527
OTUD3	84617	17037	244451	0.00661231	0.00707719	0.00958593	171403	214089	35379	0.0065423	0.00818921	0.0080477
USP29	121123	29423	347631	0.00946503	0.0122224	0.013632	252705	302444	49411	0.00964552	0.0115689	0.0112396
USP43	172889	40640	442328	0.0135102	0.0168819	0.0173455	352036	455804	76805	0.0134369	0.0174351	0.0174709
USP4	133237	27484	378303	0.0104117	0.0114169	0.0148348	267486	298095	50819	0.0102097	0.0114026	0.0115599
OTUD7B	100063	23311	215770	0.00781932	0.00968342	0.00846123	208533	269769	48281	0.00795952	0.010319	0.0109825
USP50	114711	21556	281672	0.00896397	0.00895439	0.0110455	233508	267320	48025	0.00891279	0.0102254	0.0109243
YOD1	59245	15717	142723	0.00462964	0.00652886	0.00559676	125734	156174	25218	0.00479915	0.00597388	0.00573637
OTUD6A	102613	22550	222830	0.00801858	0.0093673	0.00873808	206268	258602	44401	0.00787307	0.00989189	0.0100999
USP13	200233	39047	471173	0.015647	0.0162202	0.0184766	401736	540068	78636	0.0153339	0.0206584	0.0178874
USP27X	159937	34230	417613	0.0124981	0.0142192	0.0163763	333851	356782	58151	0.0127428	0.0136474	0.0132277
MPND	110913	26549	261405	0.00866718	0.0110285	0.0102508	228424	274687	43101	0.00871874	0.0105072	0.00980423
STAMBP	101835	23579	199650	0.00795779	0.00979475	0.0078291	217709	298935	48025	0.00830976	0.0114347	0.0109243
USP42	95979	24511	271297	0.00750018	0.0101819	0.0106387	197007	217025	28089	0.00751958	0.00830151	0.00638944
USP2	105409	21527	226480	0.00823707	0.00894235	0.00888122	216081	235174	42565	0.00824762	0.00899574	0.00968231
USP17L8	174069	37343	408536	0.0136024	0.0155123	0.0160204	344531	434362	61761	0.0131504	0.016615	0.0140488
FAM63B	106662	23983	243085	0.00833499	0.00996257	0.00953237	225389	276041	41780	0.0086029	0.010559	0.00950374
USP6	119129	23984	224561	0.00930921	0.00996299	0.00880596	238945	268891	52302	0.00912032	0.0102855	0.0118972
FAM188B	93532	19790	230986	0.00730896	0.00822079	0.00905791	193970	236093	32572	0.00740366	0.00903089	0.00740919
OTUD1	117271	24764	284029	0.00916402	0.010287	0.0111379	244883	280902	41541	0.00934697	0.0107449	0.00944938
OTUB2	97759	23689	172795	0.00763927	0.00984044	0.00677601	199853	288647	44324	0.00762821	0.0110412	0.0100824
USP51	82862	17845	154924	0.00647516	0.00741284	0.00607521	162797	191337	34015	0.00621382	0.00731891	0.00773743
CYLD	90311	21485	195549	0.00705726	0.0089249	0.00766828	174855	213123	31891	0.00667406	0.00815225	0.00725428
USP17L25	110119	21131	300332	0.00860513	0.00877785	0.0117773	218418	238361	28779	0.00833682	0.00911764	0.00654639
ATXN3	143503	26329	277482	0.0112139	0.0109371	0.0108812	301319	323678	59159	0.0115011	0.0123811	0.013457
USP40	125837	25092	266823	0.0098334	0.0104233	0.0104632	248415	270927	43631	0.00948178	0.0103633	0.00992479
USP12	191948	37034	455831	0.0149996	0.015384	0.017875	379212	313913	57680	0.0144742	0.0120076	0.0131205
OTUD6B	102969	19749	234895	0.0080464	0.00820376	0.0092112	208483	203651	33044	0.00795761	0.00778994	0.00751655
ZC3H12A	91995	22009	192787	0.00718885	0.00914257	0.00755997	202053	204795	34911	0.00771218	0.0078337	0.00794124
USP26	96976	23753	190653	0.00757809	0.00986703	0.00747629	192309	299732	34150	0.00734026	0.0114652	0.00776814
USP48	144116	35741	264708	0.0112618	0.0148469	0.0103803	295891	396444	53168	0.0112939	0.0151645	0.0120942
USP17L10	114731	23840	244946	0.00896553	0.00990317	0.00960534	238853	254282	36888	0.00911681	0.00972664	0.00839095
UCHL1	113192	29011	215225	0.00884527	0.0120512	0.00843986	231894	274017	40046	0.00885119	0.0104815	0.00910931
USP35	113274	24468	200644	0.00885168	0.010164	0.00786808	231244	260311	41683	0.00882638	0.00995726	0.00948168
USP17L2	107889	18338	176929	0.00843087	0.00761763	0.00693812	211155	195693	40608	0.0080596	0.00748553	0.00923715
OTUD7A	88817	16156	169285	0.00694051	0.00671123	0.00663836	181444	197180	30247	0.00692556	0.00754241	0.00688032
USP21	119199	25941	233538	0.00931468	0.0107759	0.00915799	241656	251676	37147	0.00922379	0.00962696	0.00844987
USP15	114774	21237	199628	0.00896889	0.00882188	0.00782824	235539	244145	40443	0.00899031	0.00933889	0.00919961
ZRANB1	105444	18019	210920	0.00823981	0.00748512	0.00827104	205202	233570	29820	0.00783238	0.00893438	0.00678319
USP32	149405	24987	232018	0.0116751	0.0103796	0.00909838	302173	291940	54645	0.0115337	0.0111671	0.0124302
USP25	114879	17164	212217	0.0089771	0.00712995	0.0083219	229174	207420	35045	0.00874737	0.00793411	0.00797172
USP19	149284	34715	231635	0.0116656	0.0144207	0.00908336	304618	371974	52555	0.011627	0.0142285	0.0119547
USP17L17	109219	20805	197449	0.0085348	0.00864243	0.00774279	226284	215259	33832	0.00863706	0.00823396	0.0076958
FAM188A	136686	23168	258359	0.0106812	0.00962402	0.0101313	270541	244860	36642	0.0103263	0.00936624	0.008335
OTULIN	90176	18873	157288	0.00704671	0.00783987	0.00616791	189855	182382	27881	0.0072466	0.00697637	0.00634212
USP30	86559	12451	139853	0.00676406	0.00517216	0.00548421	177087	198272	27811	0.00675925	0.00758418	0.0063262
JOSD1	98469	17891	184059	0.00769476	0.00743195	0.00721771	197209	165079	26375	0.00752729	0.0063145	0.00599955
USP31	131515	28028	184232	0.0102771	0.0116429	0.0072245	264787	261982	45386	0.0101067	0.0100212	0.010324
STAMBPL1	116714	21165	193176	0.00912049	0.00879197	0.00757523	232056	208941	34356	0.00885737	0.00799229	0.007815
TNFAIP3	139681	30216	244047	0.0109152	0.0125518	0.00957009	286071	345909	39808	0.0109191	0.0132315	0.00905517
USP44	129397	25134	211875	0.0101116	0.0104407	0.00830849	256873	260067	37217	0.00980461	0.00994793	0.00846579
USP17L12	86291	13123	157118	0.00674312	0.00545131	0.00616125	178975	141564	23145	0.00683132	0.00541502	0.00526482
PAN2	154651	28984	248153	0.012085	0.01204	0.0097311	317053	276086	42964	0.0121016	0.0105607	0.00977307
JOSD2	135417	22946	202969	0.010582	0.0095318	0.00795925	294044	270335	39894	0.0112234	0.0103407	0.00907473
USP45	93507	16428	110485	0.00730701	0.00682421	0.00433257	190259	173467	30492	0.00726202	0.00663536	0.00693605
USP22	146639	31543	192086	0.0114589	0.013103	0.00753248	300128	331991	44440	0.0114556	0.0126991	0.0101088
USP20	134787	22369	208956	0.0105328	0.00929211	0.00819403	285007	258642	35885	0.0108785	0.00989342	0.0081628
FAM63A	103758	14662	168643	0.00810806	0.00609062	0.00661319	217466	175853	25779	0.00830048	0.00672662	0.00586398
USP33	98975	16243	135297	0.0077343	0.00674737	0.00530555	199141	146079	26807	0.00760103	0.00558773	0.00609782
USP3	86406	17632	154072	0.00675211	0.00732436	0.0060418	219401	145941	21657	0.00837434	0.00558245	0.00492634
COPS5	85626	10297	131751	0.00669115	0.00427739	0.0051665	183412	154657	20344	0.00700067	0.00591585	0.00462767
VCPIP1	92778	13040	113811	0.00725004	0.00541683	0.004463	182201	162408	24727	0.00695445	0.00621233	0.00562468
USP49	168662	21830	206481	0.0131799	0.00906821	0.00809697	339178	259069	45632	0.0129461	0.00990975	0.01038
USP47	155812	21251	221423	0.0121758	0.0088277	0.00868291	311513	196652	36609	0.0118902	0.00752222	0.00832749
USP54	104112	15175	164212	0.00813572	0.00630372	0.00643943	213709	126352	21068	0.00815708	0.00483314	0.00479236
USP24	77133	11094	98277	0.00602748	0.00460846	0.00385385	158662	127521	19673	0.00605599	0.00487786	0.00447504
UCHL5	95551	20487	124544	0.00746673	0.00851033	0.00488388	197450	238130	23577	0.00753649	0.00910881	0.00536309
USP17L5	133711	19133	164390	0.0104487	0.00794788	0.00644641	270949	172267	33424	0.0103419	0.00658946	0.00760299
USP38	102161	15600	108618	0.00798326	0.00648026	0.00425936	205866	155213	27627	0.00785772	0.00593712	0.00628434
USP17L21	100274	14705	108357	0.00783581	0.00610848	0.00424913	200888	174002	26488	0.00766772	0.00665582	0.00602525
USP17L26	52522	5931	64715	0.00410428	0.00246375	0.00253774	107969	60528	12261	0.00412108	0.00231528	0.00278902
USP17L4	138690	14788	193600	0.0108378	0.00614296	0.00759185	279292	158631	26309	0.0106603	0.00606786	0.00598454
USP17L20	120592	13802	173657	0.00942353	0.00573337	0.00680981	259780	177053	23500	0.00991557	0.00677253	0.00534557
USP17L3	155203	20640	173923	0.0121282	0.00857389	0.00682024	325252	275082	37410	0.0124146	0.0105223	0.00850969
USP17L15	76486	12255	82020	0.00597692	0.00509074	0.00321634	154085	116876	17722	0.00588129	0.00447067	0.00403124
USP36	149768	16715	157143	0.0117035	0.00694343	0.00616223	303256	201777	35116	0.011575	0.00771825	0.00798787
UCHL3	84846	13632	123832	0.0066302	0.00566275	0.00485596	172046	129981	13873	0.00656684	0.00497196	0.00315571
BAP1	146293	23323	125747	0.0114319	0.00968841	0.00493106	294952	244334	38680	0.0112581	0.00934612	0.00879858
USP5	99474	11491	89610	0.00777329	0.00477338	0.00351398	197860	166593	24685	0.00755214	0.00637242	0.00561512
USP9X	86796	13328	140240	0.00678258	0.00553647	0.00549939	176062	99181	10571	0.00672013	0.00379381	0.0024046
USP17L24	100510	13980	101972	0.00785425	0.00580731	0.00399874	204977	183226	22580	0.00782379	0.00700865	0.0051363
OTUB1	144609	28587	118827	0.0113003	0.0118751	0.0046597	291123	319815	33722	0.0111119	0.0122334	0.00767078
USP17L11	43322	4425	32918	0.00338535	0.00183815	0.00129085	92216	70770	10363	0.0035198	0.00270705	0.00235728
USP16	76593	12082	69539	0.00598528	0.00501888	0.00272691	154524	135132	15055	0.00589804	0.00516899	0.00342458
MYSM1	78734	11631	66302	0.00615259	0.00483153	0.00259998	163592	124610	16622	0.00624416	0.00476651	0.00378102
USP17L30	137088	15897	129022	0.0107126	0.00660364	0.00505949	270846	146786	23924	0.0103379	0.00561477	0.00544202
USP17L18	154554	13933	128576	0.0120775	0.00578779	0.005042	307862	159660	29505	0.0117508	0.00610722	0.00671153
USP17L27	94120	10001	83890	0.00735491	0.00415443	0.00328967	197157	85312	15656	0.00752531	0.0032633	0.00356129
USP17L22	79671	7651	35490	0.00622581	0.00317824	0.00139171	92894	62651	13135	0.00354568	0.00239649	0.00298783
USP8	67226	9322	56254	0.0052533	0.00387237	0.00220595	139892	84503	10921	0.00533955	0.00323236	0.00248421
USP17L28	126500	11986	108014	0.00988521	0.004979	0.00423567	254714	103642	18541	0.00972221	0.00396445	0.00421754
USP39	93337	9315	70302	0.00729372	0.00386946	0.00275683	191386	91416	15123	0.00730503	0.00349679	0.00344005
OTUD5	108721	15584	65542	0.00849589	0.00647362	0.00257017	227815	156602	19742	0.00869549	0.00599025	0.00449073
USP37	65209	6451	65931	0.00509569	0.00267975	0.00258543	129047	65953	6411	0.00492561	0.0025228	0.00145832
USP17L19	86134	9858	85502	0.00673085	0.00409503	0.00335289	224467	77470	12296	0.0085677	0.00296334	0.00279698
OTUD4	80679	8680	59213	0.00630458	0.00360568	0.00232199	161431	78153	11095	0.00616168	0.00298946	0.00252379
USP10	94939	12830	47852	0.00741891	0.0053296	0.00187647	194413	108766	16666	0.00742057	0.00416045	0.00379103
COPS6	138241	12609	128783	0.0108027	0.0052378	0.00505011	279558	116413	12360	0.0106705	0.00445296	0.00281154
USP17L29	141837	10770	79073	0.0110837	0.00447387	0.00310078	286086	129103	21019	0.0109196	0.00493837	0.00478121
USP7	90819	7123	57036	0.00709695	0.0029589	0.00223662	190619	71880	12734	0.00727576	0.00274951	0.00289662
PSMD14	82636	8773	50884	0.0064575	0.00364432	0.00199537	164423	48246	8525	0.00627588	0.00184548	0.00193919
USP1	94049	7631	34015	0.00734936	0.00316993	0.00133387	200211	61092	5412	0.00764187	0.00233685	0.00123107
