# Supplementary material for: Circular synthesized CRISPR/Cas gRNAs for functional interrogations in the coding and noncoding genome
Source: eLife journal article supplement (doi:10.7554/elife.42549), 2019-03-06
Supplement: supp [file elife-42549-supp-v1.zip › elife_poa_e42549_Supplementary_File_5.xlsx]

## Sheet: T0_T11_res.gene_summary
id	num	neg|score	neg|p-value		neg|fdr	neg|rank	neg|goodsgrna	neg|lfc	pos|score	pos|p-value		pos|fdr	pos|rank	pos|goodsgrna	pos|lfc
USP28	3	1	0.999995	-2.17148e-06	0.999995	117	0	1.6249	0.0303	0.0499	-1.30182	0.000294	2	3	1.6249
BRCC3	3	0.79103	0.80257	-0.0955171	0.999995	82	1	0.97309	0.0092413	0.025209	-1.59844	0.594935	5	2	0.97309
FAM188B3	1	0.93816	0.93847	-0.0275796	0.999995	107	0	0.94928	0.061842	0.062322	-1.20536	0.919243	15	1	0.94928
Non-Targeting-Control	37	1	0.999995	-2.17148e-06	0.999995	118	1	0.87938	6.45e-12	0.0499	-1.30182	0.000294	1	35	0.87938
FAM188B2	1	0.85132	0.85197	-0.0695757	0.999995	92	0	0.80478	0.14868	0.14892	-0.827047	0.999646	28	1	0.80478
USP34	3	0.80989	0.81718	-0.0876823	0.999995	85	1	0.73134	0.037929	0.092018	-1.03613	0.982479	10	2	0.73134
USP17L13	3	0.073141	0.16807	-0.77451	0.665736	28	1	0.68756	0.088116	0.19749	-0.704455	0.999646	19	2	0.68756
USP43	3	0.39439	0.54612	-0.262712	0.99142	65	1	0.64208	0.057763	0.13582	-0.867036	0.999646	14	2	0.64208
USP9Y	3	0.98861	0.98859	-0.00498379	0.999995	114	0	0.5977	0.011391	0.030819	-1.51118	0.606105	6	3	0.5977
USP17L7	3	0.99555	0.9954	-0.00200236	0.999995	115	0	0.58247	0.0044493	0.012462	-1.90441	0.367638	4	3	0.58247
OTUB2	3	0.8509	0.85176	-0.0696828	0.999995	91	1	0.55698	0.19161	0.32843	-0.483557	0.999646	29	2	0.55698
STAMBP	3	0.84184	0.84413	-0.0735907	0.999995	89	1	0.55141	0.10527	0.23048	-0.637367	0.999646	23	2	0.55141
USP26	3	0.98311	0.98296	-0.00746416	0.999995	113	0	0.51384	0.016891	0.044823	-1.3485	0.755595	7	3	0.51384
ZC3H12A	3	0.82014	0.82519	-0.083446	0.999995	86	1	0.42829	0.21434	0.35382	-0.451218	0.999646	31	2	0.42829
OTUD7B	3	0.95466	0.95387	-0.0205108	0.999995	109	0	0.39653	0.045338	0.10892	-0.962892	0.988629	12	3	0.39653
FAM188B4	1	0.70658	0.70733	-0.150378	0.999995	77	0	0.39357	0.29342	0.29386	-0.53186	0.999646	37	1	0.39357
YOD1	3	0.87401	0.87396	-0.0585084	0.999995	97	0	0.38396	0.24132	0.38317	-0.416609	0.999646	34	2	0.38396
USP18	3	0.94727	0.9465	-0.0238794	0.999995	108	0	0.36711	0.052734	0.12467	-0.904238	0.999646	13	3	0.36711
USP14	3	0.96967	0.96918	-0.0135956	0.999995	112	0	0.3381	0.030325	0.074599	-1.12727	0.978079	8	3	0.3381
MPND	3	0.79926	0.80882	-0.0921481	0.999995	84	1	0.33495	0.2045	0.34266	-0.465137	0.999646	30	2	0.33495
USP4	3	0.96223	0.96183	-0.0169017	0.999995	111	0	0.3265	0.037773	0.091618	-1.03802	0.982479	9	3	0.3265
TNFAIP3	3	0.86591	0.86589	-0.0625373	0.999995	95	1	0.32098	0.22434	0.36482	-0.437921	0.999646	33	2	0.32098
ATXN3L	3	0.91588	0.91472	-0.0387118	0.999995	105	0	0.31844	0.084119	0.18955	-0.722276	0.999646	17	3	0.31844
ATXN3	3	0.38302	0.53445	-0.272093	0.99142	63	1	0.31689	0.21766	0.35743	-0.446809	0.999646	32	2	0.31689
USP46	3	0.85961	0.85983	-0.0655874	0.999995	94	1	0.30371	0.24476	0.38713	-0.412143	0.999646	35	2	0.30371
USP48	3	0.95856	0.95811	-0.0185846	0.999995	110	0	0.28985	0.041441	0.099913	-1.00038	0.982479	11	3	0.28985
USP29	3	0.87987	0.87932	-0.055853	0.999995	98	0	0.24838	0.27281	0.41772	-0.379115	0.999646	36	2	0.24838
USP40	3	0.71009	0.74954	-0.125205	0.999995	78	1	0.23788	0.30535	0.45203	-0.344833	0.999646	40	2	0.23788
USP19	3	0.71695	0.75353	-0.122899	0.999995	79	1	0.22375	0.2944	0.44073	-0.355827	0.999646	38	2	0.22375
OTULIN	3	0.32402	0.47447	-0.323791	0.94789	59	1	0.21218	0.34255	0.49073	-0.309157	0.999646	44	2	0.21218
OTUB1	3	0.6852	0.73456	-0.133973	0.999995	76	1	0.21002	0.29804	0.44435	-0.352275	0.999646	39	2	0.21002
FAM63B	3	0.91436	0.91325	-0.0394103	0.999995	104	0	0.20144	0.085643	0.19249	-0.715592	0.999646	18	3	0.20144
USP27X	3	0.87	0.86987	-0.0605456	0.999995	96	0	0.19538	0.35011	0.49852	-0.302317	0.999646	45	2	0.19538
UCHL1	3	0.83002	0.83371	-0.078985	0.999995	88	1	0.19113	0.32011	0.46736	-0.330348	0.999646	42	2	0.19113
USP42	3	0.88178	0.88115	-0.0549502	0.999995	99	0	0.18048	0.3768	0.52652	-0.278585	0.999646	47	2	0.18048
USP17L1	3	0.89283	0.8922	-0.0495378	0.999995	100	0	0.17292	0.10717	0.23424	-0.630339	0.999646	24	3	0.17292
USP13	3	0.9218	0.92061	-0.0359243	0.999995	106	0	0.17186	0.0782	0.17805	-0.749458	0.999646	16	3	0.17186
USP6	3	0.89808	0.8971	-0.0471591	0.999995	101	0	0.14589	0.10192	0.22427	-0.649229	0.999646	22	3	0.14589
USP51	3	0.90807	0.9072	-0.042297	0.999995	102	0	0.12131	0.091927	0.20469	-0.688903	0.999646	21	3	0.12131
USP50	3	0.8553	0.85569	-0.0676835	0.999995	93	1	0.10723	0.43112	0.58204	-0.235047	0.999646	54	2	0.10723
USP22	3	0.55782	0.67097	-0.173297	0.999995	72	1	0.09498	0.33008	0.47769	-0.320854	0.999646	43	2	0.09498
USP35	3	0.91125	0.91012	-0.0409013	0.999995	103	0	0.093895	0.088748	0.19855	-0.70213	0.999646	20	3	0.093895
CYLD	3	0.84867	0.84983	-0.0706679	0.999995	90	1	0.092704	0.38872	0.53894	-0.26846	0.999646	48	2	0.092704
USP2	3	0.66277	0.7219	-0.141523	0.999995	74	1	0.069335	0.43503	0.58603	-0.23208	0.999646	55	2	0.069335
USP44	3	0.79654	0.80681	-0.0932287	0.999995	83	1	0.052494	0.43895	0.59026	-0.228957	0.999646	57	2	0.052494
OTUD1	3	0.75586	0.77779	-0.109138	0.999995	80	1	0.049495	0.40002	0.55012	-0.259543	0.999646	50	2	0.049495
USP31	3	0.76499	0.78405	-0.105656	0.999995	81	1	0.015645	0.59779	0.67874	-0.168297	0.999646	66	1	0.015645
USP30	3	0.67036	0.72559	-0.139309	0.999995	75	1	0.015131	0.83243	0.83422	-0.0787194	0.999646	86	1	0.015131
MYSM1	3	0.31178	0.46188	-0.335471	0.941727	57	1	0.013977	0.80462	0.80986	-0.0915901	0.999646	84	1	0.013977
STAMBPL1	3	0.5759	0.67896	-0.168156	0.999995	73	1	0.0086468	0.78542	0.79483	-0.0997257	0.999646	79	1	0.0086468
OTUD6A	3	0.82513	0.82935	-0.0812622	0.999995	87	1	-0.011928	0.43848	0.5897	-0.229369	0.999646	56	1	-0.011928
USP3	3	0.44384	0.59631	-0.224528	0.999995	68	1	-0.013085	0.8509	0.85112	-0.0700092	0.999646	88	1	-0.013085
FAM188B	3	0.52976	0.65815	-0.181675	0.999995	71	1	-0.014911	0.31792	0.46535	-0.33222	0.999646	41	1	-0.014911
USP45	3	0.45445	0.60735	-0.216561	0.999995	69	2	-0.03598	0.79654	0.80346	-0.0950357	0.999646	82	1	-0.03598
UCHL5	3	0.46647	0.61935	-0.208064	0.999995	70	2	-0.047815	0.3715	0.52051	-0.283571	0.999646	46	1	-0.047815
USP21	3	0.43112	0.58286	-0.234436	0.999995	67	2	-0.070124	0.48038	0.62389	-0.204892	0.999646	59	1	-0.070124
USP32	3	0.09851	0.21792	-0.661703	0.745835	34	3	-0.076265	0.90149	0.9002	-0.045661	0.999646	94	0	-0.076265
USP11	3	0.41549	0.56704	-0.246386	0.999995	66	2	-0.097617	0.13189	0.26299	-0.580061	0.999646	26	1	-0.097617
USP17L24	3	0.19496	0.33814	-0.470903	0.875954	45	2	-0.12731	0.75276	0.7704	-0.113284	0.999646	74	1	-0.12731
FAM188A	3	0.2994	0.44925	-0.347512	0.941727	55	2	-0.14715	0.51529	0.6393	-0.194295	0.999646	61	1	-0.14715
OTUD6B	3	0.34633	0.49734	-0.303347	0.962067	61	2	-0.17535	0.67784	0.72195	-0.141493	0.999646	70	1	-0.17535
USP15	3	0.095474	0.21197	-0.673726	0.745835	33	2	-0.17551	0.48547	0.62604	-0.203398	0.999646	60	1	-0.17551
USP17L17	3	0.26137	0.4096	-0.38764	0.941727	51	2	-0.17624	0.41119	0.56115	-0.250921	0.999646	52	1	-0.17624
OTUD3	3	0.39221	0.54399	-0.264409	0.99142	64	2	-0.18194	0.52014	0.64145	-0.192837	0.999646	62	1	-0.18194
USP5	3	0.084119	0.18955	-0.722276	0.698966	32	3	-0.1905	0.91588	0.91472	-0.0387118	0.999646	95	0	-0.1905
USP17L8	3	0.2944	0.4444	-0.352226	0.941727	54	2	-0.20264	0.13906	0.27101	-0.567015	0.999646	27	1	-0.20264
USP17L2	3	0.38064	0.5321	-0.274007	0.99142	62	2	-0.21117	0.77096	0.78406	-0.105651	0.999646	77	1	-0.21117
BAP1	3	0.31271	0.46288	-0.334532	0.941727	58	2	-0.23042	0.71009	0.74255	-0.129274	0.999646	72	1	-0.23042
USP17L10	3	0.28355	0.4331	-0.363412	0.941727	53	2	-0.23978	0.40562	0.55561	-0.25523	0.999646	51	1	-0.23978
USP25	3	0.1054	0.23075	-0.636858	0.750581	36	3	-0.24082	0.8946	0.89379	-0.0487645	0.999646	92	0	-0.24082
USP16	3	0.33129	0.48198	-0.316971	0.94789	60	2	-0.24512	0.79926	0.80559	-0.0938859	0.999646	83	1	-0.24512
OTUD7A	3	0.30535	0.45541	-0.341597	0.941727	56	2	-0.26221	0.5486	0.65455	-0.184057	0.999646	63	1	-0.26221
USP20	3	0.23448	0.38089	-0.4192	0.934193	48	2	-0.27643	0.69959	0.73573	-0.133282	0.999646	71	1	-0.27643
USP33	3	0.05968	0.1399	-0.854182	0.611416	27	3	-0.28459	0.94032	0.93933	-0.0271818	0.999646	99	0	-0.28459
PAN2	3	0.22434	0.37017	-0.431599	0.929366	47	2	-0.29194	0.76799	0.78149	-0.107077	0.999646	76	1	-0.29194
USP12	3	0.19802	0.34147	-0.466647	0.875954	46	2	-0.30264	0.76198	0.77701	-0.109573	0.999646	75	1	-0.30264
JOSD2	3	0.24476	0.39189	-0.406836	0.934193	49	2	-0.33899	0.85311	0.85325	-0.0689237	0.999646	89	1	-0.33899
USP24	3	0.27638	0.42546	-0.371141	0.941727	52	2	-0.34375	0.78824	0.79698	-0.0985526	0.999646	80	1	-0.34375
USP38	3	0.16372	0.30517	-0.515458	0.818409	44	2	-0.38132	0.77971	0.79053	-0.102082	0.999646	78	1	-0.38132
VCPIP1	3	0.11822	0.25483	-0.593749	0.751752	40	3	-0.39705	0.88178	0.88115	-0.0549502	0.999646	90	0	-0.39705
ZRANB1	3	0.24822	0.39584	-0.40248	0.934193	50	2	-0.41435	0.56239	0.66147	-0.17949	0.999646	64	1	-0.41435
UCHL3	3	0.11446	0.24807	-0.605426	0.750581	39	3	-0.43445	0.88554	0.88504	-0.0530371	0.999646	91	0	-0.43445
USP47	3	0.036023	0.087695	-1.05703	0.496354	20	3	-0.49731	0.96398	0.96341	-0.0161889	0.999646	106	0	-0.49731
USP49	3	0.050545	0.12026	-0.919879	0.567609	25	3	-0.51331	0.94946	0.94887	-0.0227933	0.999646	101	0	-0.51331
OTUD5	3	0.075348	0.17246	-0.763312	0.665736	30	3	-0.52957	0.92465	0.92353	-0.034549	0.999646	96	0	-0.52957
USP54	3	0.025262	0.063509	-1.19716	0.445917	15	3	-0.55388	0.97474	0.97439	-0.0112672	0.999646	110	0	-0.55388
JOSD1	3	0.15773	0.29852	-0.525027	0.818409	43	2	-0.57087	0.62306	0.69215	-0.1598	0.999646	68	1	-0.57087
FAM63A	3	0.1002	0.22122	-0.655176	0.745835	35	3	-0.57886	0.8998	0.89852	-0.0464723	0.999646	93	0	-0.57886
USP9X	3	0.035169	0.085869	-1.06616	0.496354	19	3	-0.61672	0.96483	0.96412	-0.0158689	0.999646	107	0	-0.61672
USP10	3	0.027357	0.067991	-1.16755	0.445917	17	3	-0.65855	0.97264	0.97228	-0.0122086	0.999646	108	0	-0.65855
USP36	3	0.045338	0.10892	-0.962892	0.535507	24	3	-0.66567	0.95466	0.95387	-0.0205108	0.999646	103	0	-0.66567
USP17L12	3	0.15183	0.29224	-0.53426	0.818409	42	2	-0.70635	0.60634	0.68346	-0.165287	0.999646	67	1	-0.70635
USP17L21	3	0.07444	0.17083	-0.767436	0.665736	29	2	-0.70806	0.56693	0.66352	-0.178146	0.999646	65	1	-0.70806
USP17L26	3	0.042393	0.10185	-0.992039	0.529702	22	3	-0.76913	0.95761	0.95725	-0.0189746	0.999646	105	0	-0.76913
USP37	3	0.10782	0.23556	-0.627898	0.750581	37	2	-0.78675	0.72704	0.75328	-0.123044	0.999646	73	1	-0.78675
USP17L20	3	0.036312	0.088334	-1.05387	0.496354	21	2	-0.81223	0.67036	0.71733	-0.144281	0.999646	69	1	-0.81223
USP17L27	3	0.0214	0.055234	-1.25779	0.445917	13	3	-0.82063	0.9786	0.97848	-0.00944805	0.999646	111	0	-0.82063
USP17L5	3	0.0076297	0.021156	-1.67457	0.356638	7	3	-0.85673	0.93409	0.93273	-0.0302441	0.999646	98	0	-0.85673
USP17L3	3	0.027378	0.068021	-1.16736	0.445917	18	2	-0.8658	0.39439	0.54455	-0.263962	0.999646	49	1	-0.8658
USP17L11	3	0.11299	0.24551	-0.609931	0.750581	38	2	-0.87844	0.82014	0.82288	-0.0846635	0.999646	85	1	-0.87844
OTUD4	3	0.018499	0.048766	-1.31188	0.445917	12	3	-0.88721	0.9815	0.98131	-0.00819378	0.999646	112	0	-0.88721
USP17L30	3	0.025948	0.064937	-1.18751	0.445917	16	3	-0.90548	0.97405	0.97371	-0.0115704	0.999646	109	0	-0.90548
USP8	3	0.13746	0.27635	-0.558541	0.795355	41	2	-0.90761	0.79103	0.79901	-0.0974478	0.999646	81	1	-0.90761
COPS5	3	0.057763	0.13582	-0.867036	0.611416	26	2	-0.93989	0.42221	0.57294	-0.241891	0.999646	53	1	-0.93989
USP17L15	3	0.076651	0.1749	-0.75721	0.665736	31	2	-0.97095	0.46492	0.61727	-0.209525	0.999646	58	1	-0.97095
USP17L18	3	0.00074835	0.002181	-2.66134	0.085787	3	3	-1.0348	0.99925	0.99929	-0.000308459	0.999646	117	0	-1.0348
COPS6	3	0.00042188	0.0012228	-2.91264	0.072144	2	3	-1.0557	0.99958	0.99965	-0.00015203	0.999646	118	0	-1.0557
USP17L22	3	0.042969	0.10325	-0.98611	0.529702	23	3	-1.0956	0.95566	0.95489	-0.0200467	0.999646	104	0	-1.0956
USP17L4	3	0.011795	0.031737	-1.49843	0.445917	8	3	-1.1255	0.93148	0.93009	-0.031475	0.999646	97	0	-1.1255
USP17L19	3	0.018292	0.048097	-1.31788	0.445917	11	2	-1.1307	0.84414	0.84498	-0.0731536	0.999646	87	1	-1.1307
USP17L28	3	0.0013025	0.0037382	-2.42734	0.110277	4	3	-1.1463	0.9987	0.9987	-0.00056495	0.999646	116	0	-1.1463
PSMD14	3	0.016377	0.043566	-1.36085	0.445917	9	3	-1.1902	0.98362	0.98352	-0.0072168	0.999646	113	0	-1.1902
USP17L25	3	0.021945	0.056532	-1.24771	0.445917	14	2	-1.2177	0.11744	0.24702	-0.607268	0.999646	25	1	-1.2177
USP17L29	3	0.00041739	0.0012228	-2.91264	0.072144	1	3	-1.2738	0.94152	0.94052	-0.026632	0.999646	100	0	-1.2738
USP39	3	0.017144	0.045392	-1.34302	0.445917	10	3	-1.3037	0.95262	0.95186	-0.0214269	0.999646	102	0	-1.3037
USP7	3	0.0034646	0.009917	-2.00362	0.195033	6	3	-1.4269	0.99654	0.99633	-0.00159679	0.999646	114	0	-1.4269
USP1	3	0.0022104	0.0062935	-2.20111	0.148528	5	3	-1.6944	0.99779	0.99776	-0.000973911	0.999646	115	0	-1.6944

## Sheet: T0_T21_res.gene_summary
id	num	neg|score	neg|p-value	neg|fdr	neg|rank	neg|goodsgrna	neg|lfc	pos|score	pos|p-value	pos|fdr	pos|rank	pos|goodsgrna	pos|lfc
USP28	3	1	1	0.999995	118	0	3.1713	0.016607	0.049909	0.000294	2	3	3.1713
BRCC3	3	0.95856	0.95811	0.999995	108	0	1.6687	0.0011533	0.0031992	0.109393	3	3	1.6687
USP34	3	0.97264	0.97228	0.999995	111	0	1.3522	0.0026921	0.0078208	0.18457	4	3	1.3522
USP46	3	0.9851	0.98494	0.999995	113	0	0.9714	0.014896	0.039912	0.541225	8	3	0.9714
Non-Targeting-Control	37	0.99965	1	0.999995	117	1	0.91477	1.2995e-09	0.049909	0.000294	1	36	0.91477
FAM188B3	1	0.88553	0.88627	0.999995	95	0	0.86319	0.11447	0.11498	0.947324	28	1	0.86319
USP43	3	0.3361	0.48585	0.999995	55	1	0.81153	0.057763	0.13582	0.947324	13	2	0.81153
USP9Y	3	0.99084	0.9906	0.999995	114	0	0.81058	0.0091569	0.025009	0.421588	7	3	0.81058
USP17L13	3	0.035107	0.085689	0.492765	19	1	0.76826	0.097763	0.21676	0.947324	26	2	0.76826
USP17L7	3	0.9665	0.96588	0.999995	110	0	0.71838	0.033501	0.081776	0.921137	10	3	0.71838
USP4	3	0.98462	0.98447	0.999995	112	0	0.70589	0.01538	0.04128	0.541225	9	3	0.70589
ATXN3	3	0.42767	0.57913	0.999995	66	1	0.68278	0.092887	0.20654	0.947324	22	2	0.68278
USP14	3	0.99464	0.99441	0.999995	115	0	0.66988	0.0053594	0.014998	0.294955	6	3	0.66988
USP18	3	0.93409	0.93273	0.999995	105	0	0.6559	0.059747	0.14002	0.947324	15	3	0.6559
USP17L1	3	0.90149	0.9002	0.999995	97	0	0.65462	0.085769	0.19282	0.947324	20	3	0.65462
FAM188B4	1	0.75658	0.75814	0.999995	80	0	0.58837	0.24342	0.24335	0.996081	36	1	0.58837
ZC3H12A	3	0.75893	0.77816	0.999995	81	1	0.58413	0.19802	0.34147	0.999925	32	2	0.58413
FAM188B2	1	0.71711	0.71835	0.999995	78	0	0.56918	0.28289	0.28305	0.999925	42	1	0.56918
USP2	3	0.76799	0.78457	0.999995	83	1	0.56782	0.15773	0.29852	0.999925	30	2	0.56782
YOD1	3	0.91125	0.91012	0.999995	101	0	0.55306	0.088748	0.19855	0.947324	21	3	0.55306
OTUD7B	3	0.90646	0.90554	0.999995	100	0	0.54357	0.093544	0.20817	0.947324	23	3	0.54357
USP29	3	0.96483	0.96412	0.999995	109	0	0.50626	0.035169	0.085869	0.921137	11	3	0.50626
ATXN3L	3	0.94152	0.94052	0.999995	106	0	0.49568	0.058482	0.13731	0.947324	14	3	0.49568
OTUD1	3	0.76499	0.78243	0.999995	82	1	0.47503	0.18844	0.33119	0.999925	31	2	0.47503
USP27X	3	0.95158	0.95074	0.999995	107	0	0.41383	0.048417	0.11564	0.947324	12	3	0.41383
USP50	3	0.85311	0.85351	0.999995	91	1	0.39418	0.21105	0.35548	0.999925	33	2	0.39418
CYLD	3	0.53924	0.6584	0.999995	73	1	0.3941	0.25518	0.40313	0.999925	37	2	0.3941
USP11	3	0.79654	0.80559	0.999995	85	1	0.38913	0.073141	0.16807	0.947324	16	2	0.38913
USP51	3	0.82513	0.82859	0.999995	86	1	0.38687	0.26219	0.41045	0.999925	39	2	0.38687
USP15	3	0.20177	0.34367	0.897744	45	1	0.38465	0.27281	0.42182	0.999925	40	2	0.38465
USP13	3	0.9218	0.92061	0.999995	103	0	0.35419	0.0782	0.17805	0.947324	18	3	0.35419
USP35	3	0.82758	0.83091	0.999995	87	1	0.34705	0.31641	0.46679	0.999925	45	2	0.34705
STAMBP	3	0.90482	0.90376	0.999995	99	0	0.34128	0.09518	0.21138	0.947324	24	3	0.34128
USP6	3	0.91739	0.91619	0.999995	102	0	0.33531	0.082612	0.1868	0.947324	19	3	0.33531
MPND	3	0.87794	0.87758	0.999995	94	0	0.32535	0.23109	0.37731	0.999925	35	2	0.32535
USP40	3	0.8874	0.88681	0.999995	96	0	0.2701	0.1126	0.2448	0.996081	27	3	0.2701
USP17L8	3	0.79103	0.80131	0.999995	84	1	0.26774	0.28355	0.4331	0.999925	43	2	0.26774
FAM63B	3	0.90316	0.90205	0.999995	98	0	0.25901	0.096836	0.21466	0.947324	25	3	0.25901
USP17L2	3	0.61056	0.69231	0.999995	74	1	0.25825	0.32383	0.47431	0.999925	46	2	0.25825
OTUD3	3	0.8509	0.85148	0.999995	90	1	0.23596	0.26137	0.4096	0.999925	38	2	0.23596
USP12	3	0.86591	0.86585	0.999995	92	0	0.22768	0.33879	0.48952	0.999925	47	2	0.22768
OTUB2	3	0.92465	0.92353	0.999995	104	0	0.22593	0.075348	0.17246	0.947324	17	3	0.22593
USP26	3	0.87598	0.87583	0.999995	93	0	0.18397	0.38834	0.54016	0.999925	50	2	0.18397
FAM188B	3	0.48038	0.63312	0.999995	72	1	0.14487	0.28687	0.43633	0.999925	44	2	0.14487
USP32	3	0.6393	0.70672	0.999995	75	1	0.13666	0.38064	0.5321	0.999925	49	2	0.13666
UCHL1	3	0.30561	0.45451	0.993184	54	1	0.13009	0.39995	0.55154	0.999925	51	2	0.13009
USP42	3	0.6852	0.73191	0.999995	77	1	0.087704	0.28055	0.42974	0.999925	41	2	0.087704
OTUD6B	3	0.83952	0.84156	0.999995	89	1	0.062742	0.4468	0.59933	0.999925	54	2	0.062742
USP31	3	0.67036	0.72281	0.999995	76	1	0.056329	0.45466	0.60757	0.999925	55	2	0.056329
USP17L10	3	0.75586	0.77609	0.999995	79	1	0.018585	0.48619	0.63885	0.999925	56	2	0.018585
OTUD6A	3	0.83482	0.83725	0.999995	88	1	0.0062572	0.35397	0.50487	0.999925	48	1	0.0062572
TNFAIP3	3	0.47435	0.62723	0.999995	70	2	-0.029272	0.69245	0.73891	0.999925	68	1	-0.029272
USP25	3	0.4783	0.63107	0.999995	71	2	-0.03294	0.77682	0.7924	0.999925	74	1	-0.03294
USP48	3	0.47041	0.62321	0.999995	69	2	-0.035315	0.5486	0.66663	0.999925	59	1	-0.035315
USP44	3	0.4468	0.59917	0.999995	68	2	-0.048495	0.84867	0.84983	0.999925	82	1	-0.048495
OTULIN	3	0.37728	0.52814	0.999995	59	2	-0.069363	0.66277	0.7219	0.999925	66	1	-0.069363
USP17L17	3	0.43112	0.58257	0.999995	67	2	-0.096151	0.65506	0.71772	0.999925	65	1	-0.096151
USP20	3	0.39995	0.55104	0.999995	63	2	-0.11481	0.7938	0.80503	0.999925	77	1	-0.11481
USP21	3	0.38834	0.5396	0.999995	62	2	-0.12284	0.41119	0.56243	0.999925	52	1	-0.12284
FAM63A	3	0.38449	0.53549	0.999995	61	2	-0.13974	0.87987	0.87932	0.999925	88	0	-0.13974
USP33	3	0.096836	0.21466	0.719655	35	3	-0.15796	0.90316	0.90205	0.999925	93	0	-0.15796
PAN2	3	0.33879	0.4886	0.999995	56	2	-0.15842	0.86383	0.86383	0.999925	85	1	-0.15842
OTUD7A	3	0.38064	0.53152	0.999995	60	2	-0.16204	0.59348	0.68717	0.999925	62	1	-0.16204
USP30	3	0.4233	0.57458	0.999995	65	2	-0.16288	0.78258	0.79649	0.999925	75	1	-0.16288
USP3	3	0.40383	0.55453	0.999995	64	2	-0.16969	0.85961	0.85983	0.999925	84	1	-0.16969
VCPIP1	3	0.10896	0.23785	0.719655	39	3	-0.17358	0.89104	0.89032	0.999925	90	0	-0.17358
USP45	3	0.2678	0.41517	0.960588	51	2	-0.20868	0.79103	0.80257	0.999925	76	1	-0.20868
USP19	3	0.34633	0.49646	0.999995	58	2	-0.21285	0.67784	0.72999	0.999925	67	1	-0.21285
ZRANB1	3	0.34255	0.49252	0.999995	57	2	-0.21905	0.60634	0.69379	0.999925	63	1	-0.21905
USP17L12	3	0.30535	0.45429	0.993184	53	2	-0.27988	0.53924	0.66252	0.999925	58	1	-0.27988
FAM188A	3	0.19496	0.33611	0.897744	44	2	-0.31665	0.22198	0.36772	0.999925	34	1	-0.31665
USP9X	3	0.26137	0.40817	0.960588	49	2	-0.34514	0.87794	0.87758	0.999925	87	0	-0.34514
USP47	3	0.042393	0.10185	0.546284	22	3	-0.35477	0.95761	0.95725	0.999925	101	0	-0.35477
USP22	3	0.24822	0.39431	0.960588	48	2	-0.35657	0.70312	0.7452	0.999925	69	1	-0.35657
USP5	3	0.048417	0.11564	0.593307	23	3	-0.3608	0.95158	0.95074	0.999925	100	0	-0.3608
USP38	3	0.29077	0.43943	0.993184	52	2	-0.36609	0.79654	0.80681	0.999925	78	1	-0.36609
USP54	3	0.084119	0.18955	0.70998	31	3	-0.37365	0.91588	0.91472	0.999925	95	0	-0.37365
JOSD2	3	0.26219	0.40902	0.960588	50	2	-0.37783	0.87	0.86987	0.999925	86	0	-0.37783
STAMBPL1	3	0.22434	0.3685	0.925181	47	2	-0.39135	0.58913	0.68507	0.999925	61	1	-0.39135
USP37	3	0.019607	0.051342	0.432736	14	3	-0.39546	0.92035	0.91894	0.999925	96	0	-0.39546
USP36	3	0.05805	0.13646	0.635476	25	2	-0.425	0.82513	0.82935	0.999925	79	1	-0.425
USP17L25	3	0.08807	0.19741	0.70998	32	2	-0.50132	0.12469	0.26298	0.999925	29	1	-0.50132
USP49	3	0.10527	0.23048	0.719655	37	2	-0.52425	0.74011	0.76763	0.999925	71	1	-0.52425
USP17L20	3	0.12909	0.26513	0.763064	41	2	-0.53216	0.76499	0.78405	0.999925	73	1	-0.53216
JOSD1	3	0.20776	0.34997	0.897744	46	2	-0.53921	0.44384	0.59631	0.999925	53	1	-0.53921
UCHL3	3	0.10192	0.22427	0.719655	36	3	-0.54037	0.89808	0.8971	0.999925	92	0	-0.54037
USP17L24	3	0.035169	0.085869	0.492765	20	3	-0.54364	0.96483	0.96412	0.999925	104	0	-0.54364
MYSM1	3	0.080625	0.18293	0.70998	30	2	-0.55085	0.82758	0.83163	0.999925	80	1	-0.55085
USP17L11	3	0.065913	0.15341	0.67044	27	3	-0.55415	0.93409	0.93273	0.999925	99	0	-0.55415
UCHL5	3	0.088748	0.19855	0.70998	33	3	-0.55592	0.91125	0.91012	0.999925	94	0	-0.55592
COPS5	3	0.15477	0.29314	0.823588	42	2	-0.57885	0.64328	0.71161	0.999925	64	1	-0.57885
USP24	3	0.18844	0.32915	0.897744	43	2	-0.58217	0.83482	0.83786	0.999925	81	1	-0.58217
USP16	3	0.030325	0.074599	0.492765	17	3	-0.59509	0.96967	0.96918	0.999925	106	0	-0.59509
OTUB1	3	0.033501	0.081776	0.492765	18	3	-0.63399	0.9665	0.96588	0.999925	105	0	-0.63399
USP17L5	3	0.059747	0.14002	0.635476	26	2	-0.63782	0.88178	0.88115	0.999925	89	0	-0.63782
USP17L26	3	0.10717	0.23424	0.719655	38	3	-0.64302	0.89283	0.8922	0.999925	91	0	-0.64302
USP17L21	3	0.12094	0.25607	0.755403	40	2	-0.65758	0.74649	0.77148	0.999925	72	1	-0.65758
BAP1	3	0.095312	0.21166	0.719655	34	2	-0.71161	0.8553	0.85569	0.999925	83	1	-0.71161
USP17L30	3	0.036023	0.087695	0.492765	21	3	-0.71855	0.96398	0.96341	0.999925	103	0	-0.71855
USP17L18	3	0.0036485	0.010296	0.245092	4	3	-0.8477	0.99635	0.99615	0.999925	115	0	-0.8477
USP17L4	3	0.07889	0.17944	0.70998	29	2	-0.91325	0.71353	0.75153	0.999925	70	1	-0.91325
USP17L19	3	0.051989	0.12319	0.605688	24	3	-0.9554	0.9288	0.92751	0.999925	98	0	-0.9554
USP17L3	3	0.027378	0.068021	0.492765	16	2	-0.99176	0.55782	0.67097	0.999925	60	1	-0.99176
USP8	3	0.073141	0.16807	0.708291	28	3	-0.99486	0.9218	0.92061	0.999925	97	0	-0.99486
USP39	3	0.010996	0.029701	0.350471	10	3	-1.0033	0.989	0.98894	0.999925	110	0	-1.0033
USP17L28	3	0.01061	0.028703	0.350471	9	3	-1.0217	0.98939	0.98932	0.999925	111	0	-1.0217
OTUD4	3	0.013961	0.037187	0.365675	12	3	-1.0435	0.98604	0.98599	0.999925	108	0	-1.0435
COPS6	3	0.00020759	0.00061388	0.036219	2	3	-1.1096	0.99979	0.99988	0.999925	117	0	-1.1096
USP10	3	0.0053594	0.014998	0.252818	7	3	-1.1283	0.99464	0.99441	0.999925	113	0	-1.1283
USP17L27	3	0.012632	0.033793	0.362512	11	3	-1.1402	0.98737	0.98751	0.999925	109	0	-1.1402
OTUD5	3	0.0044493	0.012462	0.245092	6	3	-1.1951	0.99555	0.9954	0.999925	114	0	-1.1951
USP7	3	0.0084831	0.023163	0.341652	8	3	-1.3839	0.99152	0.99111	0.999925	112	0	-1.3839
USP17L22	3	0.016377	0.043566	0.395443	13	3	-1.3966	0.98362	0.98352	0.999925	107	0	-1.3966
USP17L15	3	0.021945	0.056532	0.444719	15	2	-1.5188	0.53452	0.66036	0.999925	57	1	-1.5188
USP17L29	3	0.0039422	0.011095	0.245092	5	3	-1.6112	0.96133	0.96097	0.999925	102	0	-1.6112
PSMD14	3	0.0011232	0.0031393	0.123479	3	3	-1.8321	0.99888	0.99886	0.999925	116	0	-1.8321
USP1	3	0.00013513	0.00042423	0.036219	1	3	-2.9206	0.99986	0.99993	0.999925	118	0	-2.9206

## Sheet: T11_T21_res.gene_summary
id	num	neg|score	neg|p-value	neg|fdr	neg|rank	neg|goodsgrna	neg|lfc	pos|score	pos|p-value	pos|fdr	pos|rank	pos|goodsgrna	pos|lfc
USP17L25	3	0.72034	0.75905	0.980167	89	1	0.21569	0.0039422	0.0040776	0.481154	1	1	0.21569
USP9X	3	0.48547	0.63833	0.980167	70	1	0.027984	0.011795	0.011963	0.70583	2	1	0.027984
USP15	3	0.13189	0.27482	0.980167	29	1	0.25985	0.019607	0.019529	0.768159	3	1	0.25985
USP17L12	3	0.67784	0.73429	0.980167	83	1	0.16025	0.027378	0.026587	0.784305	4	1	0.16025
USP28	3	0.99998	0.99999	0.999985	118	0	1.6222	0.035107	0.033953	0.801296	5	0	1.6222
USP46	3	0.87598	0.87583	0.980167	104	0	0.67746	0.042796	0.041489	0.81596	6	0	0.67746
USP17L26	3	0.47041	0.62357	0.980167	68	2	0.0058905	0.050443	0.049495	0.834343	7	0	0.0058905
USP17L2	3	0.66277	0.72643	0.980167	81	1	0.12823	0.05805	0.057261	0.844597	8	0	0.12823
OTUD6B	3	0.37728	0.53003	0.980167	55	1	0.24693	0.080625	0.079949	0.931556	9	0	0.24693
USP39	3	0.33879	0.49117	0.980167	50	2	-0.29174	0.08807	0.087336	0.931556	10	0	-0.29174
OTUD4	3	0.35769	0.50977	0.980167	53	2	-0.3458	0.095474	0.095202	0.931556	11	0	-0.3458
PSMD14	3	0.14618	0.29048	0.980167	30	2	-0.63562	0.10284	0.1029	0.931556	12	0	-0.63562
FAM63A	3	0.58913	0.69067	0.980167	77	1	0.15278	0.11016	0.1103	0.931556	13	0	0.15278
USP38	3	0.27419	0.42568	0.980167	41	1	0.078442	0.11744	0.11797	0.931556	14	0	0.078442
COPS5	3	0.61476	0.70298	0.980167	78	1	0.14198	0.12469	0.12512	0.931556	15	0	0.14198
USP2	3	0.8553	0.85625	0.980167	101	1	0.12056	0.13189	0.13225	0.931556	16	0	0.12056
USP17L11	3	0.40383	0.55603	0.980167	57	2	-0.59336	0.13906	0.13976	0.931556	17	0	-0.59336
USP17L17	3	0.26137	0.41219	0.980167	40	1	0.089869	0.14618	0.14699	0.931556	18	0	0.089869
BRCC3	3	0.9985	0.99846	0.999985	116	0	0.6974	0.15327	0.15396	0.931556	19	0	0.6974
USP37	3	0.30535	0.45744	0.980167	47	2	-1.0116	0.16031	0.16086	0.931556	20	0	-1.0116
USP12	3	0.97192	0.97148	0.999985	113	0	0.29963	0.16732	0.16761	0.931556	21	0	0.29963
USP17L27	3	0.38834	0.5414	0.980167	56	2	-0.39955	0.17429	0.17455	0.931556	22	0	-0.39955
USP34	3	0.99896	0.99892	0.999985	117	0	0.62911	0.18122	0.18157	0.931556	23	0	0.62911
USP54	3	0.89808	0.8971	0.980167	108	0	0.29381	0.19496	0.1951	0.942959	24	0	0.29381
USP49	3	0.4272	0.57979	0.980167	61	2	0.00022389	0.20855	0.20824	0.942959	25	0	0.00022389
USP17L4	3	0.9851	0.98494	0.999985	114	0	0.22114	0.21528	0.21529	0.942959	26	0	0.22114
OTUD3	3	0.99152	0.99111	0.999985	115	0	0.41228	0.22198	0.22223	0.942959	27	0	0.41228
OTUD7A	3	0.87202	0.87209	0.980167	103	1	0.10807	0.22864	0.2288	0.942959	28	0	0.10807
USP29	3	0.9427	0.94173	0.999985	111	0	0.26556	0.23526	0.23511	0.942959	29	0	0.26556
USP17L22	3	0.34255	0.49502	0.980167	51	2	-0.2872	0.24184	0.24136	0.942959	30	0	-0.2872
USP36	3	0.43309	0.58571	0.980167	62	1	0.25299	0.24839	0.2479	0.942959	31	0	0.25299
USP14	3	0.95664	0.95593	0.999985	112	0	0.34347	0.28055	0.28051	0.942959	32	0	0.34347
USP47	3	0.69959	0.74696	0.980167	86	1	0.27147	0.28687	0.2865	0.942959	33	0	0.27147
FAM188B4	1	0.70132	0.70217	0.980167	87	0	0.2083	0.29868	0.29935	0.942959	34	0	0.2083
USP11	3	0.88178	0.88115	0.980167	105	0	0.49608	0.2994	0.29914	0.942959	35	0	0.49608
USP17L20	3	0.65116	0.7205	0.980167	79	1	0.29235	0.31792	0.31719	0.942959	36	0	0.29235
USP17L1	3	0.84867	0.85055	0.980167	100	1	0.060485	0.32402	0.32308	0.942959	37	0	0.060485
FAM188A	3	0.20125	0.34832	0.980167	37	2	-0.15406	0.33008	0.32902	0.942959	38	0	-0.15406
USP17L29	3	0.40562	0.55798	0.980167	58	2	-0.37411	0.3361	0.33491	0.942959	39	0	-0.37411
USP17L18	3	0.9218	0.92061	0.987563	110	0	0.19929	0.34209	0.34066	0.942959	40	0	0.19929
USP25	3	0.89104	0.89032	0.980167	106	0	0.30401	0.34805	0.34681	0.942959	41	0	0.30401
OTUD1	3	0.83243	0.83703	0.980167	97	1	0.050366	0.35397	0.35282	0.942959	42	0	0.050366
USP6	3	0.5759	0.68469	0.980167	76	1	0.30728	0.35985	0.35867	0.942959	43	0	0.30728
ATXN3L	3	0.56239	0.67906	0.980167	75	1	0.27306	0.36569	0.36486	0.942959	44	0	0.27306
MPND	3	0.83718	0.84096	0.980167	98	1	0.21569	0.3715	0.37069	0.942959	45	0	0.21569
USP4	3	0.91888	0.91745	0.987563	109	0	0.27757	0.37728	0.37624	0.942959	46	0	0.27757
USP24	3	0.29804	0.45003	0.980167	45	2	-0.071888	0.38302	0.3819	0.942959	47	0	-0.071888
USP40	3	0.17284	0.31843	0.980167	34	2	-0.1251	0.39439	0.39323	0.942959	48	0	-0.1251
USP17L8	3	0.073141	0.16807	0.854252	22	1	0.062846	0.40002	0.39831	0.942959	49	0	0.062846
STAMBPL1	3	0.47011	0.62326	0.980167	67	2	0.035324	0.40562	0.40379	0.942959	50	0	0.035324
USP32	3	0.75586	0.78063	0.980167	91	1	0.19866	0.41119	0.40916	0.942959	51	0	0.19866
USP50	3	0.82265	0.82854	0.980167	96	1	0.43539	0.42221	0.42011	0.942959	52	0	0.43539
USP17L24	3	0.15327	0.29781	0.980167	31	2	-0.40444	0.44384	0.44156	0.942959	53	0	-0.40444
ATXN3	3	0.55323	0.67469	0.980167	74	1	0.24376	0.44916	0.44685	0.942959	54	0	0.24376
USP17L28	3	0.6852	0.73866	0.980167	84	1	0.13437	0.45445	0.45191	0.942959	55	0	0.13437
OTUD7B	3	0.2994	0.45132	0.980167	46	1	0.16108	0.46492	0.46235	0.942959	56	0	0.16108
CYLD	3	0.3715	0.52386	0.980167	54	1	0.040675	0.47526	0.47244	0.942959	57	0	0.040675
VCPIP1	3	0.33129	0.4837	0.980167	49	2	-0.0064479	0.48038	0.47774	0.942959	58	0	-0.0064479
USP7	3	0.81249	0.82072	0.980167	94	1	0.063597	0.48547	0.48292	0.942959	59	0	0.063597
USP27X	3	0.41119	0.56337	0.980167	59	1	0.22538	0.50053	0.49769	0.942959	60	0	0.22538
USP51	3	0.52014	0.66072	0.980167	72	1	0.2292	0.50548	0.50255	0.942959	61	0	0.2292
ZRANB1	3	0.77971	0.79677	0.980167	92	1	0.047057	0.5104	0.50778	0.942959	62	0	0.047057
USP33	3	0.48619	0.63894	0.980167	71	2	0.029605	0.52014	0.51718	0.942959	63	0	0.029605
USP35	3	0.20776	0.35508	0.980167	39	2	-0.12458	0.52976	0.52678	0.942959	64	0	-0.12458
USP17L10	3	0.28055	0.43209	0.980167	43	1	0.15304	0.53452	0.53178	0.942959	65	0	0.15304
USP42	3	0.45445	0.60776	0.980167	65	1	0.091899	0.53924	0.53704	0.942959	66	0	0.091899
JOSD1	3	0.68884	0.74098	0.980167	85	1	0.079832	0.54393	0.54188	0.942959	67	0	0.079832
OTUB2	3	0.065615	0.15272	0.854252	18	1	0.08167	0.5486	0.54668	0.942959	68	0	0.08167
USP45	3	0.28355	0.43539	0.980167	44	2	-0.35335	0.55323	0.55139	0.942959	69	0	-0.35335
USP17L19	3	0.70312	0.74904	0.980167	88	1	0.16538	0.56693	0.56579	0.953752	70	0	0.16538
USP17L30	3	0.45466	0.60798	0.980167	66	2	0.0091927	0.5759	0.57444	0.954702	71	0	0.0091927
USP9Y	3	0.20177	0.34894	0.980167	38	1	0.089281	0.60208	0.60053	0.984205	72	0	0.089281
USP18	3	0.86173	0.86215	0.980167	102	1	0.069389	0.61892	0.61759	0.998298	73	0	0.069389
USP17L5	3	0.81761	0.82472	0.980167	95	1	0.1385	0.63124	0.62945	0.999985	74	0	0.1385
USP17L13	3	0.66658	0.7282	0.980167	82	1	0.092809	0.6393	0.63784	0.999985	75	0	0.092809
YOD1	3	0.65893	0.72447	0.980167	80	1	0.15396	0.65116	0.64943	0.999985	76	0	0.15396
FAM188B	3	0.7938	0.80692	0.980167	93	1	0.17549	0.67412	0.67238	0.999985	77	0	0.17549
OTULIN	3	0.44287	0.59596	0.980167	63	2	0.011142	0.68154	0.68027	0.999985	78	0	0.011142
USP44	3	0.072256	0.16613	0.854252	21	2	-0.20626	0.69245	0.69184	0.999985	79	0	-0.20626
USP43	3	0.54393	0.67079	0.980167	73	1	0.13308	0.69604	0.6955	0.999985	80	0	0.13308
ZC3H12A	3	0.44384	0.5969	0.980167	64	1	0.13452	0.70312	0.7024	0.999985	81	0	0.13452
USP30	3	0.48224	0.63525	0.980167	69	2	0.023978	0.70662	0.70621	0.999985	82	0	0.023978
OTUD6A	3	0.75276	0.77854	0.980167	90	1	0.14244	0.71009	0.70992	0.999985	83	0	0.14244
USP13	3	0.89635	0.89545	0.980167	107	0	0.19593	0.72034	0.72005	0.999985	84	0	0.19593
STAMBP	3	0.34805	0.50049	0.980167	52	1	0.082457	0.7237	0.72322	0.999985	85	0	0.082457
USP20	3	0.16071	0.30573	0.980167	32	2	-0.063837	0.73035	0.72967	0.999985	86	0	-0.063837
FAM63B	3	0.83952	0.8431	0.980167	99	1	0.070447	0.74649	0.74555	0.999985	87	0	0.070447
USP21	3	0.11562	0.25004	0.980167	28	2	-0.043504	0.74964	0.74878	0.999985	88	0	-0.043504
PAN2	3	0.18811	0.33443	0.980167	36	2	-0.10588	0.77682	0.77663	0.999985	89	0	-0.10588
USP17L7	3	0.16732	0.31274	0.980167	33	1	0.13474	0.80727	0.80715	0.999985	90	0	0.13474
FAM188B2	1	0.18026	0.17969	0.854252	35	1	-0.2258	0.81974	0.82082	0.999985	91	0	-0.2258
USP17L21	3	0.30903	0.4613	0.980167	48	2	-0.15937	0.82265	0.82245	0.999985	92	0	-0.15937
USP5	3	0.27996	0.43146	0.980167	42	2	-0.12116	0.83002	0.8303	0.999985	93	0	-0.12116
COPS6	3	0.4116	0.56386	0.980167	60	2	-0.17182	0.83718	0.8378	0.999985	94	0	-0.17182
USP31	3	0.065873	0.15333	0.854252	19	2	-0.1572	0.84642	0.84686	0.999985	95	0	-0.1572
UCHL1	3	0.05805	0.13646	0.854252	15	3	-0.050889	0.87987	0.87932	0.999985	96	0	-0.050889
USP3	3	0.10896	0.23785	0.980167	27	3	-0.053077	0.89104	0.89032	0.999985	97	0	-0.053077
USP17L15	3	0.1002	0.22122	0.966824	26	3	-0.34712	0.8998	0.89852	0.999985	98	0	-0.34712
USP8	3	0.087186	0.19564	0.8879	25	3	-0.36647	0.91281	0.91196	0.999985	99	0	-0.36647
FAM188B3	1	0.082895	0.083413	0.806705	24	1	-0.072766	0.91711	0.91771	0.999985	100	0	-0.072766
MYSM1	3	0.079653	0.18099	0.854252	23	3	-0.55465	0.92035	0.91894	0.999985	101	0	-0.55465
USP17L3	3	0.06176	0.14465	0.854252	16	3	-0.090803	0.92605	0.92475	0.999985	102	0	-0.090803
USP1	3	0.06721	0.15622	0.854252	20	3	-1.0039	0.93279	0.93143	0.999985	103	0	-1.0039
UCHL3	3	0.064634	0.15044	0.854252	17	3	-0.093966	0.93537	0.93406	0.999985	104	0	-0.093966
OTUD5	3	0.020693	0.053827	0.705732	10	3	-0.77768	0.94615	0.9452	0.999985	105	0	-0.77768
UCHL5	3	0.027378	0.068021	0.781186	11	3	-0.49865	0.95158	0.95074	0.999985	106	0	-0.49865
USP10	3	0.044342	0.10661	0.838673	14	3	-0.62814	0.95566	0.95489	0.999985	107	0	-0.62814
JOSD2	3	0.039578	0.095711	0.806705	13	3	-0.027137	0.96042	0.96006	0.999985	108	0	-0.027137
USP16	3	0.037773	0.091618	0.806705	12	3	-0.61745	0.96223	0.96183	0.999985	109	0	-0.61745
Non-Targeting-Control	37	0.0085815	0.072822	0.781186	6	19	0.043395	0.9786	0.97858	0.999985	110	0	0.043395
BAP1	3	0.011391	0.030819	0.454579	9	3	-0.26185	0.98861	0.98859	0.999985	111	0	-0.26185
TNFAIP3	3	0.010996	0.029701	0.454579	8	3	-0.32582	0.989	0.98894	0.999985	112	0	-0.32582
USP19	3	0.01061	0.028703	0.454579	7	3	-0.23623	0.98939	0.98932	0.999985	113	0	-0.23623
USP26	3	0.0053594	0.014998	0.353946	5	3	-0.26518	0.99464	0.99441	0.999985	114	0	-0.26518
USP48	3	0.0036485	0.010296	0.30374	3	3	-0.31474	0.99635	0.99615	0.999985	116	0	-0.31474
USP22	3	0.0017167	0.0048961	0.19258	2	3	-0.3833	0.99828	0.99823	0.999985	117	0	-0.3833
OTUB1	3	0.21097	0.64882	0.007656	1	3	-0.83147	0.99998	0.99999	0.999985	118	0	-0.83147
