# Supplementary material for: Circular synthesized CRISPR/Cas gRNAs for functional interrogations in the coding and noncoding genome
Source: eLife journal article supplement (doi:10.7554/elife.42549), 2019-03-06
Supplement: supp [file elife-42549-supp-v1.zip › elife_poa_e42549_Supplementary_File_6.xlsx]

## Sheet: Enrichment_T11
gene	p-value Repl, 1	p-value Repl, 2	p-value Repl, 3	Fisher Statistic	p-value combined	significant	Rank
USP28	0	0	0	221.048	0	TRUE	1
Non-Targeting_1	0.607143	0.404762	0	76.4896	1.89848e-14	TRUE	2
BRCC3	1	0.404762	0	75.4916	3.04201e-14	TRUE	3
USP14	1	1	0.728571	0.633339	0.995818	FALSE	4
USP17L7	1	1	0.728571	0.633339	0.995818	FALSE	5
ATXN3	1	1	1	0	1	FALSE	6
ATXN3L	1	1	1	0	1	FALSE	7
BAP1	1	1	1	0	1	FALSE	8
COPS5	1	1	1	0	1	FALSE	9
COPS6	1	1	1	0	1	FALSE	10
CYLD	1	1	1	0	1	FALSE	11
FAM188A	1	1	1	0	1	FALSE	12
FAM188B	1	1	1	0	1	FALSE	13
FAM188B2	1	1	1	0	1	FALSE	14
FAM188B3	1	1	1	0	1	FALSE	15
FAM188B4	1	1	1	0	1	FALSE	16
FAM63A	1	1	1	0	1	FALSE	17
FAM63B	1	1	1	0	1	FALSE	18
JOSD1	1	1	1	0	1	FALSE	19
JOSD2	1	1	1	0	1	FALSE	20
MPND	1	1	1	0	1	FALSE	21
MYSM1	1	1	1	0	1	FALSE	22
Non-Targeting_10	1	1	1	0	1	FALSE	23
Non-Targeting_11	1	1	1	0	1	FALSE	24
Non-Targeting_12	1	1	1	0	1	FALSE	25
Non-Targeting_13	1	1	1	0	1	FALSE	26
Non-Targeting_14	1	1	1	0	1	FALSE	27
Non-Targeting_15	1	1	1	0	1	FALSE	28
Non-Targeting_16	1	1	1	0	1	FALSE	29
Non-Targeting_17	1	1	1	0	1	FALSE	30
Non-Targeting_18	1	1	1	0	1	FALSE	31
Non-Targeting_19	1	1	1	0	1	FALSE	32
Non-Targeting_2	1	1	1	0	1	FALSE	33
Non-Targeting_20	1	1	1	0	1	FALSE	34
Non-Targeting_21	1	1	1	0	1	FALSE	35
Non-Targeting_22	1	1	1	0	1	FALSE	36
Non-Targeting_23	1	1	1	0	1	FALSE	37
Non-Targeting_24	1	1	1	0	1	FALSE	38
Non-Targeting_25	1	1	1	0	1	FALSE	39
Non-Targeting_26	1	1	1	0	1	FALSE	40
Non-Targeting_27	1	1	1	0	1	FALSE	41
Non-Targeting_28	1	1	1	0	1	FALSE	42
Non-Targeting_29	1	1	1	0	1	FALSE	43
Non-Targeting_3	1	1	1	0	1	FALSE	44
Non-Targeting_30	1	1	1	0	1	FALSE	45
Non-Targeting_31	1	1	1	0	1	FALSE	46
Non-Targeting_32	1	1	1	0	1	FALSE	47
Non-Targeting_33	1	1	1	0	1	FALSE	48
Non-Targeting_34	1	1	1	0	1	FALSE	49
Non-Targeting_35	1	1	1	0	1	FALSE	50
Non-Targeting_36	1	1	1	0	1	FALSE	51
Non-Targeting_37	1	1	1	0	1	FALSE	52
Non-Targeting_4	1	1	1	0	1	FALSE	53
Non-Targeting_5	1	1	1	0	1	FALSE	54
Non-Targeting_6	1	1	1	0	1	FALSE	55
Non-Targeting_7	1	1	1	0	1	FALSE	56
Non-Targeting_8	1	1	1	0	1	FALSE	57
Non-Targeting_9	1	1	1	0	1	FALSE	58
OTUB1	1	1	1	0	1	FALSE	59
OTUB2	1	1	1	0	1	FALSE	60
OTUD1	1	1	1	0	1	FALSE	61
OTUD3	1	1	1	0	1	FALSE	62
OTUD4	1	1	1	0	1	FALSE	63
OTUD5	1	1	1	0	1	FALSE	64
OTUD6A	1	1	1	0	1	FALSE	65
OTUD6B	1	1	1	0	1	FALSE	66
OTUD7A	1	1	1	0	1	FALSE	67
OTUD7B	1	1	1	0	1	FALSE	68
OTULIN	1	1	1	0	1	FALSE	69
PAN2	1	1	1	0	1	FALSE	70
PSMD14	1	1	1	0	1	FALSE	71
STAMBP	1	1	1	0	1	FALSE	72
STAMBPL1	1	1	1	0	1	FALSE	73
TNFAIP3	1	1	1	0	1	FALSE	74
UCHL1	1	1	1	0	1	FALSE	75
UCHL3	1	1	1	0	1	FALSE	76
UCHL5	1	1	1	0	1	FALSE	77
USP1	1	1	1	0	1	FALSE	78
USP10	1	1	1	0	1	FALSE	79
USP11	1	1	1	0	1	FALSE	80
USP12	1	1	1	0	1	FALSE	81
USP13	1	1	1	0	1	FALSE	82
USP15	1	1	1	0	1	FALSE	83
USP16	1	1	1	0	1	FALSE	84
USP17L1	1	1	1	0	1	FALSE	85
USP17L10	1	1	1	0	1	FALSE	86
USP17L11	1	1	1	0	1	FALSE	87
USP17L12	1	1	1	0	1	FALSE	88
USP17L13	1	1	1	0	1	FALSE	89
USP17L15	1	1	1	0	1	FALSE	90
USP17L17	1	1	1	0	1	FALSE	91
USP17L18	1	1	1	0	1	FALSE	92
USP17L19	1	1	1	0	1	FALSE	93
USP17L2	1	1	1	0	1	FALSE	94
USP17L20	1	1	1	0	1	FALSE	95
USP17L21	1	1	1	0	1	FALSE	96
USP17L22	1	1	1	0	1	FALSE	97
USP17L24	1	1	1	0	1	FALSE	98
USP17L25	1	1	1	0	1	FALSE	99
USP17L26	1	1	1	0	1	FALSE	100
USP17L27	1	1	1	0	1	FALSE	101
USP17L28	1	1	1	0	1	FALSE	102
USP17L29	1	1	1	0	1	FALSE	103
USP17L3	1	1	1	0	1	FALSE	104
USP17L30	1	1	1	0	1	FALSE	105
USP17L4	1	1	1	0	1	FALSE	106
USP17L5	1	1	1	0	1	FALSE	107
USP17L8	1	1	1	0	1	FALSE	108
USP18	1	1	1	0	1	FALSE	109
USP19	1	1	1	0	1	FALSE	110
USP2	1	1	1	0	1	FALSE	111
USP20	1	1	1	0	1	FALSE	112
USP21	1	1	1	0	1	FALSE	113
USP22	1	1	1	0	1	FALSE	114
USP24	1	1	1	0	1	FALSE	115
USP25	1	1	1	0	1	FALSE	116
USP26	1	1	1	0	1	FALSE	117
USP27X	1	1	1	0	1	FALSE	118
USP29	1	1	1	0	1	FALSE	119
USP3	1	1	1	0	1	FALSE	120
USP30	1	1	1	0	1	FALSE	121
USP31	1	1	1	0	1	FALSE	122
USP32	1	1	1	0	1	FALSE	123
USP33	1	1	1	0	1	FALSE	124
USP34	1	1	1	0	1	FALSE	125
USP35	1	1	1	0	1	FALSE	126
USP36	1	1	1	0	1	FALSE	127
USP37	1	1	1	0	1	FALSE	128
USP38	1	1	1	0	1	FALSE	129
USP39	1	1	1	0	1	FALSE	130
USP4	1	1	1	0	1	FALSE	131
USP40	1	1	1	0	1	FALSE	132
USP42	1	1	1	0	1	FALSE	133
USP43	1	1	1	0	1	FALSE	134
USP44	1	1	1	0	1	FALSE	135
USP45	1	1	1	0	1	FALSE	136
USP46	1	1	1	0	1	FALSE	137
USP47	1	1	1	0	1	FALSE	138
USP48	1	1	1	0	1	FALSE	139
USP49	1	1	1	0	1	FALSE	140
USP5	1	1	1	0	1	FALSE	141
USP50	1	1	1	0	1	FALSE	142
USP51	1	1	1	0	1	FALSE	143
USP54	1	1	1	0	1	FALSE	144
USP6	1	1	1	0	1	FALSE	145
USP7	1	1	1	0	1	FALSE	146
USP8	1	1	1	0	1	FALSE	147
USP9X	1	1	1	0	1	FALSE	148
USP9Y	1	1	1	0	1	FALSE	149
VCPIP1	1	1	1	0	1	FALSE	150
YOD1	1	1	1	0	1	FALSE	151
ZC3H12A	1	1	1	0	1	FALSE	152
ZRANB1	1	1	1	0	1	FALSE	153

## Sheet: Enrichment_T21
gene	p-value Repl, 1	p-value Repl, 2	Fisher Statistic	p-value combined	significant	Rank
USP28	0	0	147.365	0	TRUE	1
BRCC3	0.404762	0	75.4916	1.55431e-15	TRUE	2
USP34	0	0.876984	73.9453	3.33067e-15	TRUE	3
Non-Targeting_1	1	0.607143	0.997982	0.910102	FALSE	4
USP18	1	0.607143	0.997982	0.910102	FALSE	5
Non-Targeting_14	1	0.876984	0.262533	0.992103	FALSE	6
Non-Targeting_21	1	0.876984	0.262533	0.992103	FALSE	7
Non-Targeting_7	1	0.876984	0.262533	0.992103	FALSE	8
Non-Targeting_9	1	0.876984	0.262533	0.992103	FALSE	9
STAMBP	1	0.876984	0.262533	0.992103	FALSE	10
USP11	1	0.876984	0.262533	0.992103	FALSE	11
USP14	1	0.876984	0.262533	0.992103	FALSE	12
USP17L7	1	0.876984	0.262533	0.992103	FALSE	13
USP4	1	0.876984	0.262533	0.992103	FALSE	14
USP43	1	0.876984	0.262533	0.992103	FALSE	15
USP46	1	0.876984	0.262533	0.992103	FALSE	16
USP9Y	1	0.876984	0.262533	0.992103	FALSE	17
YOD1	1	0.876984	0.262533	0.992103	FALSE	18
USP6	1	0.894737	0.222451	0.994255	FALSE	19
ATXN3	1	0.982993	0.0343062	0.999855	FALSE	20
USP2	1	0.982993	0.0343062	0.999855	FALSE	21
USP51	1	0.993506	0.0130294	0.999979	FALSE	22
ATXN3L	1	1	0	1	FALSE	23
BAP1	1	1	0	1	FALSE	24
COPS5	1	1	0	1	FALSE	25
COPS6	1	1	0	1	FALSE	26
CYLD	1	1	0	1	FALSE	27
FAM188A	1	1	0	1	FALSE	28
FAM188B	1	1	0	1	FALSE	29
FAM188B2	1	1	0	1	FALSE	30
FAM188B3	1	1	0	1	FALSE	31
FAM188B4	1	1	0	1	FALSE	32
FAM63A	1	1	0	1	FALSE	33
FAM63B	1	1	0	1	FALSE	34
JOSD1	1	1	0	1	FALSE	35
JOSD2	1	1	0	1	FALSE	36
MPND	1	1	0	1	FALSE	37
MYSM1	1	1	0	1	FALSE	38
Non-Targeting_10	1	1	0	1	FALSE	39
Non-Targeting_11	1	1	0	1	FALSE	40
Non-Targeting_12	1	1	0	1	FALSE	41
Non-Targeting_13	1	1	0	1	FALSE	42
Non-Targeting_15	1	1	0	1	FALSE	43
Non-Targeting_16	1	1	0	1	FALSE	44
Non-Targeting_17	1	1	0	1	FALSE	45
Non-Targeting_18	1	1	0	1	FALSE	46
Non-Targeting_19	1	1	0	1	FALSE	47
Non-Targeting_2	1	1	0	1	FALSE	48
Non-Targeting_20	1	1	0	1	FALSE	49
Non-Targeting_22	1	1	0	1	FALSE	50
Non-Targeting_23	1	1	0	1	FALSE	51
Non-Targeting_24	1	1	0	1	FALSE	52
Non-Targeting_25	1	1	0	1	FALSE	53
Non-Targeting_26	1	1	0	1	FALSE	54
Non-Targeting_27	1	1	0	1	FALSE	55
Non-Targeting_28	1	1	0	1	FALSE	56
Non-Targeting_29	1	1	0	1	FALSE	57
Non-Targeting_3	1	1	0	1	FALSE	58
Non-Targeting_30	1	1	0	1	FALSE	59
Non-Targeting_31	1	1	0	1	FALSE	60
Non-Targeting_32	1	1	0	1	FALSE	61
Non-Targeting_33	1	1	0	1	FALSE	62
Non-Targeting_34	1	1	0	1	FALSE	63
Non-Targeting_35	1	1	0	1	FALSE	64
Non-Targeting_36	1	1	0	1	FALSE	65
Non-Targeting_37	1	1	0	1	FALSE	66
Non-Targeting_4	1	1	0	1	FALSE	67
Non-Targeting_5	1	1	0	1	FALSE	68
Non-Targeting_6	1	1	0	1	FALSE	69
Non-Targeting_8	1	1	0	1	FALSE	70
OTUB1	1	1	0	1	FALSE	71
OTUB2	1	1	0	1	FALSE	72
OTUD1	1	1	0	1	FALSE	73
OTUD3	1	1	0	1	FALSE	74
OTUD4	1	1	0	1	FALSE	75
OTUD5	1	1	0	1	FALSE	76
OTUD6A	1	1	0	1	FALSE	77
OTUD6B	1	1	0	1	FALSE	78
OTUD7A	1	1	0	1	FALSE	79
OTUD7B	1	1	0	1	FALSE	80
OTULIN	1	1	0	1	FALSE	81
PAN2	1	1	0	1	FALSE	82
PSMD14	1	1	0	1	FALSE	83
STAMBPL1	1	1	0	1	FALSE	84
TNFAIP3	1	1	0	1	FALSE	85
UCHL1	1	1	0	1	FALSE	86
UCHL3	1	1	0	1	FALSE	87
UCHL5	1	1	0	1	FALSE	88
USP1	1	1	0	1	FALSE	89
USP10	1	1	0	1	FALSE	90
USP12	1	1	0	1	FALSE	91
USP13	1	1	0	1	FALSE	92
USP15	1	1	0	1	FALSE	93
USP16	1	1	0	1	FALSE	94
USP17L1	1	1	0	1	FALSE	95
USP17L10	1	1	0	1	FALSE	96
USP17L11	1	1	0	1	FALSE	97
USP17L12	1	1	0	1	FALSE	98
USP17L13	1	1	0	1	FALSE	99
USP17L15	1	1	0	1	FALSE	100
USP17L17	1	1	0	1	FALSE	101
USP17L18	1	1	0	1	FALSE	102
USP17L19	1	1	0	1	FALSE	103
USP17L2	1	1	0	1	FALSE	104
USP17L20	1	1	0	1	FALSE	105
USP17L21	1	1	0	1	FALSE	106
USP17L22	1	1	0	1	FALSE	107
USP17L24	1	1	0	1	FALSE	108
USP17L25	1	1	0	1	FALSE	109
USP17L26	1	1	0	1	FALSE	110
USP17L27	1	1	0	1	FALSE	111
USP17L28	1	1	0	1	FALSE	112
USP17L29	1	1	0	1	FALSE	113
USP17L3	1	1	0	1	FALSE	114
USP17L30	1	1	0	1	FALSE	115
USP17L4	1	1	0	1	FALSE	116
USP17L5	1	1	0	1	FALSE	117
USP17L8	1	1	0	1	FALSE	118
USP19	1	1	0	1	FALSE	119
USP20	1	1	0	1	FALSE	120
USP21	1	1	0	1	FALSE	121
USP22	1	1	0	1	FALSE	122
USP24	1	1	0	1	FALSE	123
USP25	1	1	0	1	FALSE	124
USP26	1	1	0	1	FALSE	125
USP27X	1	1	0	1	FALSE	126
USP29	1	1	0	1	FALSE	127
USP3	1	1	0	1	FALSE	128
USP30	1	1	0	1	FALSE	129
USP31	1	1	0	1	FALSE	130
USP32	1	1	0	1	FALSE	131
USP33	1	1	0	1	FALSE	132
USP35	1	1	0	1	FALSE	133
USP36	1	1	0	1	FALSE	134
USP37	1	1	0	1	FALSE	135
USP38	1	1	0	1	FALSE	136
USP39	1	1	0	1	FALSE	137
USP40	1	1	0	1	FALSE	138
USP42	1	1	0	1	FALSE	139
USP44	1	1	0	1	FALSE	140
USP45	1	1	0	1	FALSE	141
USP47	1	1	0	1	FALSE	142
USP48	1	1	0	1	FALSE	143
USP49	1	1	0	1	FALSE	144
USP5	1	1	0	1	FALSE	145
USP50	1	1	0	1	FALSE	146
USP54	1	1	0	1	FALSE	147
USP7	1	1	0	1	FALSE	148
USP8	1	1	0	1	FALSE	149
USP9X	1	1	0	1	FALSE	150
VCPIP1	1	1	0	1	FALSE	151
ZC3H12A	1	1	0	1	FALSE	152
ZRANB1	1	1	0	1	FALSE	153

## Sheet: Depletion_T11
gene	p-value Repl, 1	p-value Repl, 2	p-value Repl, 3	Fisher Statistic	p-value combined	significant	Rank
USP7	0	0	0.467033	148.888	0	TRUE	1
USP1	0.151786	0	0.404762	79.2622	5.10703e-15	TRUE	2
USP17L29	0.151786	0	0.404762	79.2622	5.10703e-15	TRUE	3
USP17L22	0.151786	0	0.467033	78.976	5.77316e-15	TRUE	4
USP17L18	0	0.433673	0.467033	76.8764	1.57652e-14	TRUE	5
USP17L27	0.53125	0	0.467033	76.4705	1.90958e-14	TRUE	6
PSMD14	0.795567	0	0.467033	75.6628	2.79776e-14	TRUE	7
USP17L15	0.996337	0	0.467033	75.2128	3.475e-14	TRUE	8
USP17L28	0.151786	0.220779	0.467033	8.31447	0.215958	FALSE	9
COPS6	0.151786	0.28022	0.467033	7.83764	0.250241	FALSE	10
USP17L25	0.242857	0.28022	0.467033	6.89764	0.330418	FALSE	11
USP39	0.151786	0.575188	0.467033	6.3994	0.379966	FALSE	12
OTUD4	0.242857	0.220779	0.936735	5.98246	0.425158	FALSE	13
USP17L19	0.53125	0.220779	0.758929	4.83792	0.564762	FALSE	14
USP17L30	0.728571	0.220779	0.642857	4.53819	0.604251	FALSE	15
USP17L26	0.607143	0.5	0.404762	4.19319	0.650551	FALSE	16
USP54	0.737245	0.5	1	1.99596	0.920069	FALSE	17
USP17L11	0.728571	0.575188	0.936735	1.87017	0.931244	FALSE	18
USP36	0.53125	1	0.758929	1.81674	0.935758	FALSE	19
USP17L21	0.636054	1	0.642857	1.78861	0.938078	FALSE	20
USP8	0.737245	0.607143	1	1.60765	0.952026	FALSE	21
USP10	0.728571	0.693878	0.887363	1.60326	0.952343	FALSE	22
USP9X	0.979263	0.5	1	1.42821	0.96412	FALSE	23
USP15	0.53125	1	0.936735	1.39576	0.966116	FALSE	24
USP5	0.53125	1	0.936735	1.39576	0.966116	FALSE	25
USP17L4	0.575188	0.887363	1	1.34512	0.969112	FALSE	26
USP49	0.53125	1	1	1.26505	0.97355	FALSE	27
COPS5	0.971429	0.860119	0.642857	1.24301	0.974707	FALSE	28
USP17L24	0.575188	1	1	1.10612	0.981268	FALSE	29
USP30	0.575188	1	1	1.10612	0.981268	FALSE	30
OTULIN	1	0.772727	0.758929	1.06735	0.98293	FALSE	31
USP17L12	0.996337	0.899471	0.674603	1.0065	0.985365	FALSE	32
OTUD5	1	0.986607	0.642857	0.910632	0.988774	FALSE	33
USP37	0.737245	0.921182	0.936735	0.904575	0.988972	FALSE	34
USP47	1	0.84472	0.758929	0.889194	0.989466	FALSE	35
USP17L20	0.728571	0.993506	0.936735	0.777079	0.992674	FALSE	36
USP17L3	1	0.986607	0.758929	0.578662	0.996745	FALSE	37
MYSM1	1	1	0.758929	0.551695	0.997151	FALSE	38
USP33	0.996337	0.921182	0.936735	0.302245	0.999486	FALSE	39
VCPIP1	0.996337	1	0.887363	0.246343	0.999716	FALSE	40
JOSD1	1	0.887363	1	0.239003	0.99974	FALSE	41
USP17L5	0.996337	0.986607	0.936735	0.165017	0.999912	FALSE	42
USP38	1	1	0.936735	0.13071	0.999956	FALSE	43
FAM63A	0.996337	1	1	0.00733946	1	FALSE	44
JOSD2	0.996337	1	1	0.00733946	1	FALSE	45
USP25	0.996337	1	1	0.00733946	1	FALSE	46
ATXN3	1	1	1	0	1	FALSE	47
ATXN3L	1	1	1	0	1	FALSE	48
BAP1	1	1	1	0	1	FALSE	49
BRCC3	1	1	1	0	1	FALSE	50
CYLD	1	1	1	0	1	FALSE	51
FAM188A	1	1	1	0	1	FALSE	52
FAM188B	1	1	1	0	1	FALSE	53
FAM188B2	1	1	1	0	1	FALSE	54
FAM188B3	1	1	1	0	1	FALSE	55
FAM188B4	1	1	1	0	1	FALSE	56
FAM63B	1	1	1	0	1	FALSE	57
MPND	1	1	1	0	1	FALSE	58
Non-Targeting_1	1	1	1	0	1	FALSE	59
Non-Targeting_10	1	1	1	0	1	FALSE	60
Non-Targeting_11	1	1	1	0	1	FALSE	61
Non-Targeting_12	1	1	1	0	1	FALSE	62
Non-Targeting_13	1	1	1	0	1	FALSE	63
Non-Targeting_14	1	1	1	0	1	FALSE	64
Non-Targeting_15	1	1	1	0	1	FALSE	65
Non-Targeting_16	1	1	1	0	1	FALSE	66
Non-Targeting_17	1	1	1	0	1	FALSE	67
Non-Targeting_18	1	1	1	0	1	FALSE	68
Non-Targeting_19	1	1	1	0	1	FALSE	69
Non-Targeting_2	1	1	1	0	1	FALSE	70
Non-Targeting_20	1	1	1	0	1	FALSE	71
Non-Targeting_21	1	1	1	0	1	FALSE	72
Non-Targeting_22	1	1	1	0	1	FALSE	73
Non-Targeting_23	1	1	1	0	1	FALSE	74
Non-Targeting_24	1	1	1	0	1	FALSE	75
Non-Targeting_25	1	1	1	0	1	FALSE	76
Non-Targeting_26	1	1	1	0	1	FALSE	77
Non-Targeting_27	1	1	1	0	1	FALSE	78
Non-Targeting_28	1	1	1	0	1	FALSE	79
Non-Targeting_29	1	1	1	0	1	FALSE	80
Non-Targeting_3	1	1	1	0	1	FALSE	81
Non-Targeting_30	1	1	1	0	1	FALSE	82
Non-Targeting_31	1	1	1	0	1	FALSE	83
Non-Targeting_32	1	1	1	0	1	FALSE	84
Non-Targeting_33	1	1	1	0	1	FALSE	85
Non-Targeting_34	1	1	1	0	1	FALSE	86
Non-Targeting_35	1	1	1	0	1	FALSE	87
Non-Targeting_36	1	1	1	0	1	FALSE	88
Non-Targeting_37	1	1	1	0	1	FALSE	89
Non-Targeting_4	1	1	1	0	1	FALSE	90
Non-Targeting_5	1	1	1	0	1	FALSE	91
Non-Targeting_6	1	1	1	0	1	FALSE	92
Non-Targeting_7	1	1	1	0	1	FALSE	93
Non-Targeting_8	1	1	1	0	1	FALSE	94
Non-Targeting_9	1	1	1	0	1	FALSE	95
OTUB1	1	1	1	0	1	FALSE	96
OTUB2	1	1	1	0	1	FALSE	97
OTUD1	1	1	1	0	1	FALSE	98
OTUD3	1	1	1	0	1	FALSE	99
OTUD6A	1	1	1	0	1	FALSE	100
OTUD6B	1	1	1	0	1	FALSE	101
OTUD7A	1	1	1	0	1	FALSE	102
OTUD7B	1	1	1	0	1	FALSE	103
PAN2	1	1	1	0	1	FALSE	104
STAMBP	1	1	1	0	1	FALSE	105
STAMBPL1	1	1	1	0	1	FALSE	106
TNFAIP3	1	1	1	0	1	FALSE	107
UCHL1	1	1	1	0	1	FALSE	108
UCHL3	1	1	1	0	1	FALSE	109
UCHL5	1	1	1	0	1	FALSE	110
USP11	1	1	1	0	1	FALSE	111
USP12	1	1	1	0	1	FALSE	112
USP13	1	1	1	0	1	FALSE	113
USP14	1	1	1	0	1	FALSE	114
USP16	1	1	1	0	1	FALSE	115
USP17L1	1	1	1	0	1	FALSE	116
USP17L10	1	1	1	0	1	FALSE	117
USP17L13	1	1	1	0	1	FALSE	118
USP17L17	1	1	1	0	1	FALSE	119
USP17L2	1	1	1	0	1	FALSE	120
USP17L7	1	1	1	0	1	FALSE	121
USP17L8	1	1	1	0	1	FALSE	122
USP18	1	1	1	0	1	FALSE	123
USP19	1	1	1	0	1	FALSE	124
USP2	1	1	1	0	1	FALSE	125
USP20	1	1	1	0	1	FALSE	126
USP21	1	1	1	0	1	FALSE	127
USP22	1	1	1	0	1	FALSE	128
USP24	1	1	1	0	1	FALSE	129
USP26	1	1	1	0	1	FALSE	130
USP27X	1	1	1	0	1	FALSE	131
USP28	1	1	1	0	1	FALSE	132
USP29	1	1	1	0	1	FALSE	133
USP3	1	1	1	0	1	FALSE	134
USP31	1	1	1	0	1	FALSE	135
USP32	1	1	1	0	1	FALSE	136
USP34	1	1	1	0	1	FALSE	137
USP35	1	1	1	0	1	FALSE	138
USP4	1	1	1	0	1	FALSE	139
USP40	1	1	1	0	1	FALSE	140
USP42	1	1	1	0	1	FALSE	141
USP43	1	1	1	0	1	FALSE	142
USP44	1	1	1	0	1	FALSE	143
USP45	1	1	1	0	1	FALSE	144
USP46	1	1	1	0	1	FALSE	145
USP48	1	1	1	0	1	FALSE	146
USP50	1	1	1	0	1	FALSE	147
USP51	1	1	1	0	1	FALSE	148
USP6	1	1	1	0	1	FALSE	149
USP9Y	1	1	1	0	1	FALSE	150
YOD1	1	1	1	0	1	FALSE	151
ZC3H12A	1	1	1	0	1	FALSE	152
ZRANB1	1	1	1	0	1	FALSE	153

## Sheet: Depletion_T21
gene	p-value Repl, 1	p-value Repl, 2	Fisher Statistic	p-value combined	significant	Rank
USP1	0	0	147.365	0	TRUE	1
USP10	0	0.607143	74.6807	2.33147e-15	TRUE	2
PSMD14	0.728571	0	74.3161	2.77556e-15	TRUE	3
COPS6	0.758929	0	74.2344	2.88658e-15	TRUE	4
USP17L15	0.758929	0.151786	4.32227	0.364145	FALSE	5
USP17L28	0.758929	0.151786	4.32227	0.364145	FALSE	6
USP7	0.758929	0.151786	4.32227	0.364145	FALSE	7
USP17L25	0.777143	0.151786	4.27483	0.370087	FALSE	8
USP17L22	0.303571	0.441558	4.01917	0.403418	FALSE	9
USP9X	1	0.151786	3.77057	0.437945	FALSE	10
USP17L29	0.303571	0.607143	3.38226	0.496005	FALSE	11
OTUD4	0.758929	0.441558	2.18659	0.701486	FALSE	12
USP17L27	0.758929	0.505952	1.91432	0.751514	FALSE	13
USP17L30	1	0.404762	1.80891	0.770851	FALSE	14
UCHL3	0.758929	0.607143	1.54968	0.817807	FALSE	15
OTUD5	0.758929	0.703008	1.25647	0.868716	FALSE	16
USP8	0.758929	0.703008	1.25647	0.868716	FALSE	17
USP37	0.758929	0.728571	1.18503	0.880556	FALSE	18
COPS5	1	0.607143	0.997982	0.910102	FALSE	19
USP17L3	0.758929	0.867347	0.836328	0.933513	FALSE	20
USP39	0.758929	0.883117	0.800291	0.938409	FALSE	21
USP54	1	0.703008	0.704775	0.950739	FALSE	22
MYSM1	0.758929	1	0.551695	0.968277	FALSE	23
OTUB1	0.758929	1	0.551695	0.968277	FALSE	24
USP16	0.758929	1	0.551695	0.968277	FALSE	25
USP17L11	0.758929	1	0.551695	0.968277	FALSE	26
USP17L18	0.758929	1	0.551695	0.968277	FALSE	27
USP17L21	0.758929	1	0.551695	0.968277	FALSE	28
USP5	0.758929	1	0.551695	0.968277	FALSE	29
USP17L24	1	0.950311	0.101933	0.998745	FALSE	30
BAP1	0.980769	1	0.0388362	0.999814	FALSE	31
ATXN3	1	1	0	1	FALSE	32
ATXN3L	1	1	0	1	FALSE	33
BRCC3	1	1	0	1	FALSE	34
CYLD	1	1	0	1	FALSE	35
FAM188A	1	1	0	1	FALSE	36
FAM188B	1	1	0	1	FALSE	37
FAM188B2	1	1	0	1	FALSE	38
FAM188B3	1	1	0	1	FALSE	39
FAM188B4	1	1	0	1	FALSE	40
FAM63A	1	1	0	1	FALSE	41
FAM63B	1	1	0	1	FALSE	42
JOSD1	1	1	0	1	FALSE	43
JOSD2	1	1	0	1	FALSE	44
MPND	1	1	0	1	FALSE	45
Non-Targeting_1	1	1	0	1	FALSE	46
Non-Targeting_10	1	1	0	1	FALSE	47
Non-Targeting_11	1	1	0	1	FALSE	48
Non-Targeting_12	1	1	0	1	FALSE	49
Non-Targeting_13	1	1	0	1	FALSE	50
Non-Targeting_14	1	1	0	1	FALSE	51
Non-Targeting_15	1	1	0	1	FALSE	52
Non-Targeting_16	1	1	0	1	FALSE	53
Non-Targeting_17	1	1	0	1	FALSE	54
Non-Targeting_18	1	1	0	1	FALSE	55
Non-Targeting_19	1	1	0	1	FALSE	56
Non-Targeting_2	1	1	0	1	FALSE	57
Non-Targeting_20	1	1	0	1	FALSE	58
Non-Targeting_21	1	1	0	1	FALSE	59
Non-Targeting_22	1	1	0	1	FALSE	60
Non-Targeting_23	1	1	0	1	FALSE	61
Non-Targeting_24	1	1	0	1	FALSE	62
Non-Targeting_25	1	1	0	1	FALSE	63
Non-Targeting_26	1	1	0	1	FALSE	64
Non-Targeting_27	1	1	0	1	FALSE	65
Non-Targeting_28	1	1	0	1	FALSE	66
Non-Targeting_29	1	1	0	1	FALSE	67
Non-Targeting_3	1	1	0	1	FALSE	68
Non-Targeting_30	1	1	0	1	FALSE	69
Non-Targeting_31	1	1	0	1	FALSE	70
Non-Targeting_32	1	1	0	1	FALSE	71
Non-Targeting_33	1	1	0	1	FALSE	72
Non-Targeting_34	1	1	0	1	FALSE	73
Non-Targeting_35	1	1	0	1	FALSE	74
Non-Targeting_36	1	1	0	1	FALSE	75
Non-Targeting_37	1	1	0	1	FALSE	76
Non-Targeting_4	1	1	0	1	FALSE	77
Non-Targeting_5	1	1	0	1	FALSE	78
Non-Targeting_6	1	1	0	1	FALSE	79
Non-Targeting_7	1	1	0	1	FALSE	80
Non-Targeting_8	1	1	0	1	FALSE	81
Non-Targeting_9	1	1	0	1	FALSE	82
OTUB2	1	1	0	1	FALSE	83
OTUD1	1	1	0	1	FALSE	84
OTUD3	1	1	0	1	FALSE	85
OTUD6A	1	1	0	1	FALSE	86
OTUD6B	1	1	0	1	FALSE	87
OTUD7A	1	1	0	1	FALSE	88
OTUD7B	1	1	0	1	FALSE	89
OTULIN	1	1	0	1	FALSE	90
PAN2	1	1	0	1	FALSE	91
STAMBP	1	1	0	1	FALSE	92
STAMBPL1	1	1	0	1	FALSE	93
TNFAIP3	1	1	0	1	FALSE	94
UCHL1	1	1	0	1	FALSE	95
UCHL5	1	1	0	1	FALSE	96
USP11	1	1	0	1	FALSE	97
USP12	1	1	0	1	FALSE	98
USP13	1	1	0	1	FALSE	99
USP14	1	1	0	1	FALSE	100
USP15	1	1	0	1	FALSE	101
USP17L1	1	1	0	1	FALSE	102
USP17L10	1	1	0	1	FALSE	103
USP17L12	1	1	0	1	FALSE	104
USP17L13	1	1	0	1	FALSE	105
USP17L17	1	1	0	1	FALSE	106
USP17L19	1	1	0	1	FALSE	107
USP17L2	1	1	0	1	FALSE	108
USP17L20	1	1	0	1	FALSE	109
USP17L26	1	1	0	1	FALSE	110
USP17L4	1	1	0	1	FALSE	111
USP17L5	1	1	0	1	FALSE	112
USP17L7	1	1	0	1	FALSE	113
USP17L8	1	1	0	1	FALSE	114
USP18	1	1	0	1	FALSE	115
USP19	1	1	0	1	FALSE	116
USP2	1	1	0	1	FALSE	117
USP20	1	1	0	1	FALSE	118
USP21	1	1	0	1	FALSE	119
USP22	1	1	0	1	FALSE	120
USP24	1	1	0	1	FALSE	121
USP25	1	1	0	1	FALSE	122
USP26	1	1	0	1	FALSE	123
USP27X	1	1	0	1	FALSE	124
USP28	1	1	0	1	FALSE	125
USP29	1	1	0	1	FALSE	126
USP3	1	1	0	1	FALSE	127
USP30	1	1	0	1	FALSE	128
USP31	1	1	0	1	FALSE	129
USP32	1	1	0	1	FALSE	130
USP33	1	1	0	1	FALSE	131
USP34	1	1	0	1	FALSE	132
USP35	1	1	0	1	FALSE	133
USP36	1	1	0	1	FALSE	134
USP38	1	1	0	1	FALSE	135
USP4	1	1	0	1	FALSE	136
USP40	1	1	0	1	FALSE	137
USP42	1	1	0	1	FALSE	138
USP43	1	1	0	1	FALSE	139
USP44	1	1	0	1	FALSE	140
USP45	1	1	0	1	FALSE	141
USP46	1	1	0	1	FALSE	142
USP47	1	1	0	1	FALSE	143
USP48	1	1	0	1	FALSE	144
USP49	1	1	0	1	FALSE	145
USP50	1	1	0	1	FALSE	146
USP51	1	1	0	1	FALSE	147
USP6	1	1	0	1	FALSE	148
USP9Y	1	1	0	1	FALSE	149
VCPIP1	1	1	0	1	FALSE	150
YOD1	1	1	0	1	FALSE	151
ZC3H12A	1	1	0	1	FALSE	152
ZRANB1	1	1	0	1	FALSE	153
