# Supplementary material for: Circular synthesized CRISPR/Cas gRNAs for functional interrogations in the coding and noncoding genome
Source: eLife journal article supplement (doi:10.7554/elife.42549), 2019-03-06
Supplement: supp [file elife-42549-supp-v1.zip › elife_poa_e42549_Supplementary_File_7.xlsx]

## Sheet: sequences
name	sequence
AKTIP-1	AGG TCG AGA ATT CAA AAA CCC TGA AGA ACA GCA CAA TAA CTC GAG TTA TTG TGC TGT TCT TCA GGG ACC GGT GTT TCG TC
AKTIP-2	AGG TCG AGA ATT CAA AAA CCG GTG AAG AGA AGA CAT TAA CTC GAG TTA ATG TCT TCT CTT CAC CGG ACC GGT GTT TCG TC
ATG10-1	AGG TCG AGA ATT CAA AAA CCG GAC ATA TGG GAA GGA GTT CTC GAG AAC TCC TTC CCA TAT GTC CGG ACC GGT GTT TCG TC
ATG10-2	AGG TCG AGA ATT CAA AAA CCC GTC CGA AGT GAT TAA ATA CTC GAG TAT TTA ATC ACT TCG GAC GGG ACC GGT GTT TCG TC
ATG3-1	AGG TCG AGA ATT CAA AAA CCG GAA GAA GAT GAA GAT GAA CTC GAG TTC ATC TTC ATC TTC TTC CGG ACC GGT GTT TCG TC
ATG3-2	AGG TCG AGA ATT CAA AAA CCC TGC AGA TAT GGA AGA ATA CTC GAG TAT TCT TCC ATA TCT GCA GGG ACC GGT GTT TCG TC
BIRC6-1	AGG TCG AGA ATT CAA AAA CCA AAT AAA GCT CCA GGA TTA CTC GAG TAA TCC TGG AGC TTT ATT TGG ACC GGT GTT TCG TC
BIRC6-2	AGG TCG AGA ATT CAA AAA CCC GGA AGA TGT TGA GTG AAA CTC GAG TTT CAC TCA ACA TCT TCC GGG ACC GGT GTT TCG TC
CDC34-1	AGG TCG AGA ATT CAA AAA CCG GAA GTG GAA AGA GAG CAA CTC GAG TTG CTC TCT TTC CAC TTC CGG ACC GGT GTT TCG TC
CDC34-2	AGG TCG AGA ATT CAA AAA CCG GAA AGA GAG CAA GGG GAA CTC GAG TTC CCC TTG CTC TCT TTC CGG ACC GGT GTT TCG TC
UBE2A-1	AGG TCG AGA ATT CAA AAA CCG AAC AAA GCT GGC GTG ATT CTC GAG AAT CAC GCC AGC TTT GTT CGG ACC GGT GTT TCG TC
UBE2A-2	AGG TCG AGA ATT CAA AAA CCG AAC AAA CGG GAA TAT GAA CTC GAG TTC ATA TTC CCG TTT GTT CGG ACC GGT GTT TCG TC
UBE2B-1	AGG TCG AGA ATT CAA AAA CCG AAC AAA GCT GGA ATG ATT CTC GAG AAT CAT TCC AGC TTT GTT CGG ACC GGT GTT TCG TC
UBE2B-2	AGG TCG AGA ATT CAA AAA CCC AAA CGA GAA TAT GAG AAA CTC GAG TTT CTC ATA TTC TCG TTT GGG ACC GGT GTT TCG TC
UBE2C-1	AGG TCG AGA ATT CAA AAA CCC AAC ATT GAT AGT CCC TTG CTC GAG CAA GGG ACT ATC AAT GTT GGG ACC GGT GTT TCG TC
UBE2C-2	AGG TCG AGA ATT CAA AAA CCA ACC CAA CAT TGA TAG TCC CTC GAG GGA CTA TCA ATG TTG GGT TGG ACC GGT GTT TCG TC
UBE2D1-1	AGG TCG AGA ATT CAA AAA CCG AGA ATG GAC TCA GAA ATA CTC GAG TAT TTC TGA GTC CAT TCT CGG ACC GGT GTT TCG TC
UBE2D1-2	AGG TCG AGA ATT CAA AAA CCC AAC AGA CAT GCA AGA GAA CTC GAG TTC TCT TGC ATG TCT GTT GGG ACC GGT GTT TCG TC
UBE2D2-1	AGG TCG AGA ATT CAA AAA CCG GGA ATG GAC TCA GAA GTA CTC GAG TAC TTC TGA GTC CAT TCC CGG ACC GGT GTT TCG TC
UBE2D2-2	AGG TCG AGA ATT CAA AAA CCG AGA AAA GTA CAA CAG AAT CTC GAG ATT CTG TTG TAC TTT TCT CGG ACC GGT GTT TCG TC
UBE2D3-1	AGG TCG AGA ATT CAA AAA CCC AGC ATT TGT CTC GAT ATT CTC GAG AAT ATC GAG ACA AAT GCT GGG ACC GGT GTT TCG TC
UBE2D3-2	AGG TCG AGA ATT CAA AAA CCC AGA CAG AGA TAA GTA CAA CTC GAG TTG TAC TTA TCT CTG TCT GGG ACC GGT GTT TCG TC
UBE2D4-1	AGG TCG AGA ATT CAA AAA CCG CAA GAG AGT GGA CAC AAA CTC GAG TTT GTG TCC ACT CTC TTG CGG ACC GGT GTT TCG TC
UBE2D4-2	AGG TCG AGA ATT CAA AAA CCC CTA CAA GGC CGA CAG AGA CTC GAG TCT CTG TCG GCC TTG TAG GGG ACC GGT GTT TCG TC
UBE2DNL-1	AGG TCG AGA ATT CAA AAA CCC CAT CAA CGT TAA CGG AAA CTC GAG TTT CCG TTA ACG TTG ATG GGG ACC GGT GTT TCG TC
UBE2DNL-2	AGG TCG AGA ATT CAA AAA CCC GCC AAG GGT TGC GGA CTA CTC GAG TAG TCC GCA ACC CTT GGC GGG ACC GGT GTT TCG TC
UBE2E1-1	AGG TCG AGA ATT CAA AAA CCG CTT GGA CAT ATT GAA AGA CTC GAG TCT TTC AAT ATG TCC AAG CGG ACC GGT GTT TCG TC
UBE2E1-2	AGG TCG AGA ATT CAA AAA CCG GAC AAG AAT CTA TCA TTG CTC GAG CAA TGA TAG ATT CTT GTC CGG ACC GGT GTT TCG TC
UBE2E2-1	AGG TCG AGA ATT CAA AAA CCG CAA GAA CCA GAA AGA GAA CTC GAG TTC TCT TTC TGG TTC TTG CGG ACC GGT GTT TCG TC
UBE2E2-2	AGG TCG AGA ATT CAA AAA CCA GAA GGA ACT TGC AGA AAT CTC GAG ATT TCT GCA AGT TCC TTC TGG ACC GGT GTT TCG TC
UBE2E3-1	AGG TCG AGA ATT CAA AAA CCA AGA ACA AGA GGA AAG AAA CTC GAG TTT CTT TCC TCT TGT TCT TGG ACC GGT GTT TCG TC
UBE2E3-2	AGG TCG AGA ATT CAA AAA CCC TGA AGA ACA AGA GGA AAG CTC GAG CTT TCC TCT TGT TCT TCA GGG ACC GGT GTT TCG TC
UBE2E4P-1	AGG TCG AGA ATT CAA AAA CCG GAG ATA ACA TTT GTG AAT CTC GAG ATT CAC AAA TGT TAT CTC CGG ACC GGT GTT TCG TC
UBE2E4P-2	AGG TCG AGA ATT CAA AAA CCA AGA ACA AGA GGA AAG AAA CTC GAG TTT CTT TCC TCT TGT TCT TGG ACC GGT GTT TCG TC
UBE2F-1	AGG TCG AGA ATT CAA AAA CCG GAA TAA AGT GGA TGA CTA CTC GAG TAG TCA TCC ACT TTA TTC CGG ACC GGT GTT TCG TC
UBE2F-2	AGG TCG AGA ATT CAA AAA CCG GGA AAT ATG TCT GAG TTT CTC GAG AAA CTC AGA CAT ATT TCC CGG ACC GGT GTT TCG TC
UBE2G1-1	AGG TCG AGA ATT CAA AAA CCG GGA AGA TAA GTA TGG TTA CTC GAG TAA CCA TAC TTA TCT TCC CGG ACC GGT GTT TCG TC
UBE2G1-2	AGG TCG AGA ATT CAA AAA CCG CGA AAG AAT GGA GGG AAG CTC GAG CTT CCC TCC ATT CTT TCG CGG ACC GGT GTT TCG TC
UBE2G2-1	AGG TCG AGA ATT CAA AAA CCT GAC GAA AGT GGA GCT AAC CTC GAG GTT AGC TCC ACT TTC GTC AGG ACC GGT GTT TCG TC
UBE2G2-2	AGG TCG AGA ATT CAA AAA CCG AGA TTT ACC TGT GAG ATG CTC GAG CAT CTC ACA GGT AAA TCT CGG ACC GGT GTT TCG TC
UBE2H-1	AGG TCG AGA ATT CAA AAA CCA AGA GTA CAT CCA GAA ATA CTC GAG TAT TTC TGG ATG TAC TCT TGG ACC GGT GTT TCG TC
UBE2H-2	AGG TCG AGA ATT CAA AAA CCC AGA AGA ATA CAA GCA GAA CTC GAG TTC TGC TTG TAT TCT TCT GGG ACC GGT GTT TCG TC
UBE2I-1	AGG TCG AGA ATT CAA AAA CCG AGG AAA GCA TGG AGG AAA CTC GAG TTT CCT CCA TGC TTT CCT CGG ACC GGT GTT TCG TC
UBE2I-2	AGG TCG AGA ATT CAA AAA CCG GGA AGG AGG CTT GTT TAA CTC GAG TTA AAC AAG CCT CCT TCC CGG ACC GGT GTT TCG TC
UBE2J1-1	AGG TCG AGA ATT CAA AAA CCG AGT ATA AGG ACA GCA TTA CTC GAG TAA TGC TGT CCT TAT ACT CGG ACC GGT GTT TCG TC
UBE2J1-2	AGG TCG AGA ATT CAA AAA CCT GAA AGA AGC GGC AGA ATT CTC GAG AAT TCT GCC GCT TCT TTC AGG ACC GGT GTT TCG TC
UBE2J2-1	AGG TCG AGA ATT CAA AAA CCA CAG AAA GCA CAA GAC GAA CTC GAG TTC GTC TTG TGC TTT CTG TGG ACC GGT GTT TCG TC
UBE2J2-2	AGG TCG AGA ATT CAA AAA CCC TGA AGT CGT GGA GGA GAT CTC GAG ATC TCC TCC ACG ACT TCA GGG ACC GGT GTT TCG TC
UBE2K-1	AGG TCG AGA ATT CAA AAA CCG GAT GTA GAG ACT GCA ACA CTC GAG TGT TGC AGT CTC TAC ATC CGG ACC GGT GTT TCG TC
UBE2K-2	AGG TCG AGA ATT CAA AAA CCT GTA GAG ACT GCA ACA GAA CTC GAG TTC TGT TGC AGT CTC TAC AGG ACC GGT GTT TCG TC
UBE2L1-1	AGG TCG AGA ATT CAA AAA CCT GAA GGA GCT TGA AGA AAT CTC GAG ATT TCT TCA AGC TCC TTC AGG ACC GGT GTT TCG TC
UBE2L1-2	AGG TCG AGA ATT CAA AAA CCT AAG AAT GCT GAA GAG TTT CTC GAG AAA CTC TTC AGC ATT CTT AGG ACC GGT GTT TCG TC
UBE2L2-1	AGG TCG AGA ATT CAA AAA CCG CTG AAG TTT ACA GAG AAA CTC GAG TTT CTC TGT AAA CTT CAG CGG ACC GGT GTT TCG TC
UBE2L2-2	AGG TCG AGA ATT CAA AAA CCT GAA GGA GCT TGA AGA AAT CTC GAG ATT TCT TCA AGC TCC TTC AGG ACC GGT GTT TCG TC
UBE2L3-1	AGG TCG AGA ATT CAA AAA CCC CTT CAG AAT CGA AAT CAA CTC GAG TTG ATT TCG ATT CTG AAG GGG ACC GGT GTT TCG TC
UBE2L3-2	AGG TCG AGA ATT CAA AAA CCC CAC CGA AGA TCA CAT TTA CTC GAG TAA ATG TGA TCT TCG GTG GGG ACC GGT GTT TCG TC
UBE2L5P-1	AGG TCG AGA ATT CAA AAA CCC CGC AAA TGT GGA ATG GAA CTC GAG TTC CAT TCC ACA TTT GCG GGG ACC GGT GTT TCG TC
UBE2L5P-2	AGG TCG AGA ATT CAA AAA CCT GAA GGA GCT TGA AGA AAT CTC GAG ATT TCT TCA AGC TCC TTC AGG ACC GGT GTT TCG TC
UBE2L6-1	AGG TCG AGA ATT CAA AAA CCG GAC GAG AAC GGA CAG ATT CTC GAG AAT CTG TCC GTT CTC GTC CGG ACC GGT GTT TCG TC
UBE2L6-2	AGG TCG AGA ATT CAA AAA CCG TGA ATA GAC CGA ATA TCA CTC GAG TGA TAT TCG GTC TAT TCA CGG ACC GGT GTT TCG TC
UBE2M-1	AGG TCG AGA ATT CAA AAA CCC AGA GGT CCT GCA GAA CAA CTC GAG TTG TTC TGC AGG ACC TCT GGG ACC GGT GTT TCG TC
UBE2M-2	AGG TCG AGA ATT CAA AAA CCG GAA GTT TGT GTT CAG TTT CTC GAG AAA CTG AAC ACA AAC TTC CGG ACC GGT GTT TCG TC
UBE2N-1	AGG TCG AGA ATT CAA AAA CCG GAC ACA GTC TTA GAA ACA CTC GAG TGT TTC TAA GAC TGT GTC CGG ACC GGT GTT TCG TC
UBE2N-2	AGG TCG AGA ATT CAA AAA CCG GCT ATA TGC CAT GAA TAA CTC GAG TTA TTC ATG GCA TAT AGC CGG ACC GGT GTT TCG TC
UBE2NL-1	AGG TCG AGA ATT CAA AAA CCT AGA CAA GTT GGA AAG AAT CTC GAG ATT CTT TCC AAC TTG TCT AGG ACC GGT GTT TCG TC
UBE2NL-2	AGG TCG AGA ATT CAA AAA CCA CTA TTA CTT GCA GAA GAA CTC GAG TTC TTC TGC AAG TAA TAG TGG ACC GGT GTT TCG TC
UBE2O-1	AGG TCG AGA ATT CAA AAA CCC CAA AGA AGC GGA GAA AGA CTC GAG TCT TTC TCC GCT TCT TTG GGG ACC GGT GTT TCG TC
UBE2O-2	AGG TCG AGA ATT CAA AAA CCT CAA GAA GCT ACA GGA AAA CTC GAG TTT TCC TGT AGC TTC TTG AGG ACC GGT GTT TCG TC
UBE2Q1-1	AGG TCG AGA ATT CAA AAA CCG GAC ATA AAG AAA GGG AAT CTC GAG ATT CCC TTT CTT TAT GTC CGG ACC GGT GTT TCG TC
UBE2Q1-2	AGG TCG AGA ATT CAA AAA CCC AGT CGA ACT CGT GAA TGA CTC GAG TCA TTC ACG AGT TCG ACT GGG ACC GGT GTT TCG TC
UBE2Q2-1	AGG TCG AGA ATT CAA AAA CCA GAG ATG GCT GAA GAT ATA CTC GAG TAT ATC TTC AGC CAT CTC TGG ACC GGT GTT TCG TC
UBE2Q2-2	AGG TCG AGA ATT CAA AAA CCC AGA AGA AGA GGA AGA AGA CTC GAG TCT TCT TCC TCT TCT TCT GGG ACC GGT GTT TCG TC
UBE2QL1-1	AGG TCG AGA ATT CAA AAA CCT GGC AGG ACA TGA AGG AGA CTC GAG TCT CCT TCA TGT CCT GCC AGG ACC GGT GTT TCG TC
UBE2QL1-2	AGG TCG AGA ATT CAA AAA CCC CTT TAA GAG TTT GGT GAA CTC GAG TTC ACC AAA CTC TTA AAG GGG ACC GGT GTT TCG TC
UBE2R2-1	AGG TCG AGA ATT CAA AAA CCC CAC AAC CCT GGC GGA ATA CTC GAG TAT TCC GCC AGG GTT GTG GGG ACC GGT GTT TCG TC
UBE2R2-2	AGG TCG AGA ATT CAA AAA CCC GAC ATT GAT GAT GAA GAT CTC GAG ATC TTC ATC ATC AAT GTC GGG ACC GGT GTT TCG TC
UBE2S-1	AGG TCG AGA ATT CAA AAA CCG CAT CAA GGT CTT TCC CAA CTC GAG TTG GGA AAG ACC TTG ATG CGG ACC GGT GTT TCG TC
UBE2S-2	AGG TCG AGA ATT CAA AAA CCT CAA CGT GCT CAA GAG GGA CTC GAG TCC CTC TTG AGC ACG TTG AGG ACC GGT GTT TCG TC
UBE2T-1	AGG TCG AGA ATT CAA AAA CCC AAC ACA CCT TAT GAG AAA CTC GAG TTT CTC ATA AGG TGT GTT GGG ACC GGT GTT TCG TC
UBE2T-2	AGG TCG AGA ATT CAA AAA CCA GGA AGA GAT GCT TGA TAA CTC GAG TTA TCA AGC ATC TCT TCC TGG ACC GGT GTT TCG TC
UBE2U-1	AGG TCG AGA ATT CAA AAA CCC ATC AGA AAG AAT GGA ATT CTC GAG AAT TCC ATT CTT TCT GAT GGG ACC GGT GTT TCG TC
UBE2U-2	AGG TCG AGA ATT CAA AAA CCC AGT ATT ACA AAT GGA AGA CTC GAG TCT TCC ATT TGT AAT ACT GGG ACC GGT GTT TCG TC
UBE2V1-1	AGG TCG AGA ATT CAA AAA CCG GTT GAA CTT GGA GAA AGA CTC GAG TCT TTC TCC AAG TTC AAC CGG ACC GGT GTT TCG TC
UBE2V1-2	AGG TCG AGA ATT CAA AAA CCG CTG AAA TGT GGA TGC ATA CTC GAG TAT GCA TCC ACA TTT CAG CGG ACC GGT GTT TCG TC
UBE2V2-1	AGG TCG AGA ATT CAA AAA CCG GAC AAA CAT ACA ACA ATT CTC GAG AAT TGT TGT ATG TTT GTC CGG ACC GGT GTT TCG TC
UBE2V2-2	AGG TCG AGA ATT CAA AAA CCC TAA TGA TGT CCA AAG AAA CTC GAG TTT CTT TGG ACA TCA TTA GGG ACC GGT GTT TCG TC
UBE2W-1	AGG TCG AGA ATT CAA AAA CCG GAA TGA CCT TAA ATG AGA CTC GAG TCT CAT TTA AGG TCA TTC CGG ACC GGT GTT TCG TC
UBE2W-2	AGG TCG AGA ATT CAA AAA CCG GTC ATG TTT ACT GGT GAA CTC GAG TTC ACC AGT AAA CAT GAC CGG ACC GGT GTT TCG TC
UBE2Z-1	AGG TCG AGA ATT CAA AAA CCG TGA CAT GAT GGA AGG AAA CTC GAG TTT CCT TCC ATC ATG TCA CGG ACC GGT GTT TCG TC
UBE2Z-2	AGG TCG AGA ATT CAA AAA CCG CTT TGA ACA GGA GAG ACA CTC GAG TGT CTC TCC TGT TCA AAG CGG ACC GGT GTT TCG TC
GL2	AGG TCG AGA ATT CAA AAA CCC GTA CGC GGA ATA CTT CGA CTC GAG TCG AAG TAT TCC GCG TAC GGG ACC GGT GTT TCG TC
GL2	AGG TCG AGA ATT CAA AAA CCC GTA CGC GGA ATA CTT CGA CTC GAG TCG AAG TAT TCC GCG TAC GGG ACC GGT GTT TCG TC
GL3	AGG TCG AGA ATT CAA AAA CCC TTA CGC TGA GTA CTT CGA CTC GAG TCG AAG TAC TCA GCG TAA GGG ACC GGT GTT TCG TC
GL3	AGG TCG AGA ATT CAA AAA CCC TTA CGC TGA GTA CTT CGA CTC GAG TCG AAG TAC TCA GCG TAA GGG ACC GGT GTT TCG TC
GL4	AGG TCG AGA ATT CAA AAA CCG GAA AGA CGA TGA CGG AAA CTC GAG TTT CCG TCA TCG TCT TTC CGG ACC GGT GTT TCG TC
GL4	AGG TCG AGA ATT CAA AAA CCG GAA AGA CGA TGA CGG AAA CTC GAG TTT CCG TCA TCG TCT TTC CGG ACC GGT GTT TCG TC

## Sheet: read counts
total reads	average per shRNA
747446	8304.96
