# Supplementary material for: Circular synthesized CRISPR/Cas gRNAs for functional interrogations in the coding and noncoding genome
Source: eLife journal article supplement (doi:10.7554/elife.42549), 2019-03-06
Supplement: supp [file elife-42549-supp-v1.zip › elife_poa_e42549_Supplementary_File_8.xlsx]

## Sheet: TGW targets
Chromosome	length	TGW targets
chr1	248956422	1712492
chr10	133797422	1014908
chr11	135086622	1002643
chr12	133275309	975099
chr13	114364328	675514
chr14	107043718	660746
chr15	101991189	627225
chr16	90338345	647480
chr17	83257441	664581
chr18	80373285	563261
chr19	58617616	461186
chr2	242193529	1739343
chr20	64444167	504769
chr21	46709983	295833
chr22	50818468	313470
chr3	198295559	1419159
chr4	190214555	1312311
chr5	181538259	1290758
chr6	170805979	1219845
chr7	159345973	1161885
chr8	145138636	1041851
chr9	138394717	891227
chrX	156040895	1121225
chrY	57227415	209971
total:	3088269832	21526782
tiling size:	186.588	143.462
Genome-wide unique:		16551239
	noncoding:	15817090
	coding:	734149

## Sheet: oTGW read counts
name	read counts
oTGW MK900 (pLentiGuide)	1942296
oTGW MK912 (pLentiCRISPRv2 Puro)	5755607
oTGW MK967 (pLentiCRISPRv2 Puro GFP, 18bp)	77721552
average per library	2.84732e+07
