# Supplementary material for: Circular synthesized CRISPR/Cas gRNAs for functional interrogations in the coding and noncoding genome
Source: eLife journal article supplement (doi:10.7554/elife.42549), 2019-03-06
Supplement: supp [file elife-42549-supp-v1.zip › elife_poa_e42549_Supplementary_File_9.xlsx]

## Sheet: Sheet1
gRNA occurance	gRNA frequency	% of total reads
1	13609240	94.1916	n:	14448469
2	791355	5.47709	mean:	100337
3	43918	0.303963	stdev:	1.13554e+06
4	2858	0.0197806
5	400	0.00276846
6	134	0.000927434
7	80	0.000553692
8	64	0.000442954
9	40	0.000276846
10	28	0.000193792
11	33	0.000228398
12	25	0.000173029
13	23	0.000159186
14	18	0.000124581
15	10	6.92115e-05
16	9	6.22903e-05
17	10	6.92115e-05
18	8	5.53692e-05
19	7	4.8448e-05
20	7	4.8448e-05
21	4	2.76846e-05
22	7	4.8448e-05
23	3	2.07634e-05
24	1	6.92115e-06
25	4	2.76846e-05
26	6	4.15269e-05
27	5	3.46057e-05
28	2	1.38423e-05
29	2	1.38423e-05
30	4	2.76846e-05
31	2	1.38423e-05
32	4	2.76846e-05
33	5	3.46057e-05
34	5	3.46057e-05
35	5	3.46057e-05
36	6	4.15269e-05
37	1	6.92115e-06
38	1	6.92115e-06
40	5	3.46057e-05
41	2	1.38423e-05
43	4	2.76846e-05
44	2	1.38423e-05
45	1	6.92115e-06
48	2	1.38423e-05
49	1	6.92115e-06
50	3	2.07634e-05
51	3	2.07634e-05
52	2	1.38423e-05
53	2	1.38423e-05
54	1	6.92115e-06
55	2	1.38423e-05
56	1	6.92115e-06
60	1	6.92115e-06
61	5	3.46057e-05
62	3	2.07634e-05
63	1	6.92115e-06
68	1	6.92115e-06
69	1	6.92115e-06
70	1	6.92115e-06
71	1	6.92115e-06
72	1	6.92115e-06
75	1	6.92115e-06
76	1	6.92115e-06
77	1	6.92115e-06
80	1	6.92115e-06
84	1	6.92115e-06
85	1	6.92115e-06
88	2	1.38423e-05
89	1	6.92115e-06
94	1	6.92115e-06
95	1	6.92115e-06
96	1	6.92115e-06
99	2	1.38423e-05
101	1	6.92115e-06
102	1	6.92115e-06
103	1	6.92115e-06
109	1	6.92115e-06
110	1	6.92115e-06
112	1	6.92115e-06
120	1	6.92115e-06
122	1	6.92115e-06
125	1	6.92115e-06
126	1	6.92115e-06
129	1	6.92115e-06
130	1	6.92115e-06
132	1	6.92115e-06
137	1	6.92115e-06
139	1	6.92115e-06
141	2	1.38423e-05
142	1	6.92115e-06
144	2	1.38423e-05
147	1	6.92115e-06
158	1	6.92115e-06
163	1	6.92115e-06
164	1	6.92115e-06
175	1	6.92115e-06
179	1	6.92115e-06
180	1	6.92115e-06
181	1	6.92115e-06
183	1	6.92115e-06
185	1	6.92115e-06
186	1	6.92115e-06
188	1	6.92115e-06
194	1	6.92115e-06
202	1	6.92115e-06
203	1	6.92115e-06
204	1	6.92115e-06
206	1	6.92115e-06
217	1	6.92115e-06
220	1	6.92115e-06
228	1	6.92115e-06
248	1	6.92115e-06
259	2	1.38423e-05
260	2	1.38423e-05
264	1	6.92115e-06
292	1	6.92115e-06
341	1	6.92115e-06
381	1	6.92115e-06
392	1	6.92115e-06
408	1	6.92115e-06
419	1	6.92115e-06
491	1	6.92115e-06
567	1	6.92115e-06
593	1	6.92115e-06
696	1	6.92115e-06
727	1	6.92115e-06
799	1	6.92115e-06
821	1	6.92115e-06
827	1	6.92115e-06
962	1	6.92115e-06
1207	1	6.92115e-06
1284	1	6.92115e-06
1719	1	6.92115e-06
1934	1	6.92115e-06
2002	1	6.92115e-06
2364	1	6.92115e-06
3915	1	6.92115e-06
4183	1	6.92115e-06
4506	1	6.92115e-06
6486	1	6.92115e-06
7776	1	6.92115e-06
8448	1	6.92115e-06
9428	1	6.92115e-06
9886	1	6.92115e-06
