# Supplementary material for: Circular synthesized CRISPR/Cas gRNAs for functional interrogations in the coding and noncoding genome
Source: eLife journal article supplement (doi:10.7554/elife.42549), 2019-03-06
Supplement: supp [file elife-42549-supp-v1.zip › elife_poa_e42549_Supplementary_File_10.xlsx]

## Sheet: Sheet1
gRNA ID	sequence
0001	GCACTTGTAACGGCGTTAAA
0002	CCTGCTCCTGGTCATATGGG
0003	CTAGCCTTAACCTAGCCGAA
0004	CTGGCACCACTACATTAAAG
0005	GCAGACCTTTGATCTTCAAG
0006	CATGTTTATACTGTACACGA
0007	ACTACACTCTATCCGACCAG
0008	CTATCTTGCTCCCCTTCCAA
0009	GGGTTCTACCACTTGACAAA
0010	CGATGTCCACCATAGCAACA
0011	CTGTTGCACGAGGAGTACAA
0012	TTGTTCTATAGAAATATCAA
0013	GAGGCTACTGATCTACCAAA
0014	CGATACAATTTAGCTACAGA
0015	CTATTGGCTACTTTAATGAG
0016	ACTGGTCCCATGCATCTAAA
0017	CTTCAGGGTAATCCATTACG
0018	CTACTCAGCTTCGCGTCCAA
0019	CAAACCTGCTCTGCGTGCCA
0020	CTGAGCAAACTCCAGTCCAG
0021	CCGCTAGTATAAGAAAAGGG
0022	TAACGCACTAACTCACACCA
0023	CAGGCACCAAAAACAAACCA
0024	CAAAAAGACACACCGCGCAG
0025	GCGCGCTCCCAATAGCAACA
0026	ACTCAGCGCGAAACGCTAAA
0027	GCACTTCACACATAGCGGAA
0028	TAGGGCCCTGCGTTAATCGA
0029	CAACTTACCAGGTAAAAAGA
0030	CAGGGAAACTGCGCGTGACA
0031	CGTGACAGCAGCATACTAAA
0032	CGGCCTGGCACCTCACAAGA
0033	CCGAAGGCAGTGCAGCTCAG
0034	GCTGCGACTTCGCAAACCCA
0035	ACTAGTAGCGACCTTTGCGG
0036	CTTGGGCCACGTTTGTTCGA
0037	CGATGGATCACATCGCAACG
0038	CCTTCCTCACTTCCTCGACA
0039	ATTTGGGCTATATTGCACAG
0040	CAGTGCACTTCCGTTCCCCA
0041	TAAAGACTATGACCACCCAG
0042	ACTATTCCTTACCAGTAAAG
0043	CGTACCTATAAACCTTTAAG
0044	CATCTAAGAACCACGTTACA
0045	TGGGGCCCTCTATTGCCGAG
0046	GCTAGCCCCTACCAAACGCA
0047	CGGGCTCCAGCTGCAAGACG
0048	AATCCGGGCATAGCAAGGGG
0049	CCAGATTGAAACGAGCTACA
0050	GCACTTGGATTGCTAACAGG
0051	CGATGACAAAACGATCTCCG
0052	CCGTGATGCCCATTACACAA
0053	CTAGACATTACGTCGACCCG
0054	CATCTTGATTGAGTGACCGG
0055	TAACAGGGAAGGGCATCCGA
0056	CAATTTATTCACCTGTCCAG
0057	CAATGACCTATTGCACTGGG
0058	CTATCTCCCTCTTCAACACA
0059	CTTGATACTTCCAAAAAAAG
0060	ACTACTGAAAGTACGAGCAA
0061	ACGCCGCTTCTACCAAGACG
0062	TGAAAAGACCATCTACAGAG
0063	GCAGCCCTACGTGTTCCAAG
0064	CGTTACCTCACGCATTCAGG
0065	ACTCGAGACTGTGTTCGAAA
0066	CTTCGACACATCTTTTTACG
0067	CGGGCTCCATTCGCGCTGCA
0068	ACAAGGCAAATTTAAACAAA
0069	CTATACACATCGTCTATAGG
0070	AGGATCCCATCATTTTTCAA
0071	CATCGGCAAATTAAACTGCA
0072	ACGCTTAGAGATTAATGCCA
0073	AGAAACCATTTAATTCCCCA
0074	TAACAGATCCCACTTTCCAG
0075	CTGCCTGTTGCCAAAAGCAG
0076	CTAATTGCTGTAATTCTCAG
0077	CGGCATTCTCTGGAGTTACG
0078	AGGGGCGGCCAGTTATGCAG
0079	CCTCGTGAAGAACCAATACG
0080	TATCCAATCCGGCAAAGGAA
0081	ACTTTACCTAAATTGATACA
0082	AAACATAAAACCAATTCCGA
0083	CTTATATACCACACTCAAAA
0084	GTAGTTCGATCAGCTCGACG
0085	ATTGTTCAAATTAAGTAACA
0086	TTGGGACGTCTGACACTGCA
0087	CCTATCAGATTACAGATCCG
0088	CCATACTTAAACGTACTCAA
0089	CAAATTACTGACCAACGCCA
0090	CGAGCCTCCCATAAGTCACG
0091	CCGAATAACCGTCAAAACCG
0092	CGATGCTAAGCCCTGTGAGA
0093	CTTTACCAATAGCAGAAGAA
0094	AATCTACCATTATTTATCGA
0095	TTTGAGAACATATTAATCGG
0096	CGTGCCGGCCGGCCGATAAG
0097	CCTCAGGTCGTTCTTCACCA
0098	GTTCAAGGATCATTAATCAA
0099	CCGCGGCTCAACTCACTAAA
0100	CCTACAATTGCTCCTTGGCA
0101	GATCGATGCCTAACAATCGA
0102	GCGAGTCACTGGTAAACGGG
0103	CTATATGAATAACCGCGCGA
0104	CGGCCTCGATAACAGAGGCG
0105	CAATACTACGTCTTTCCGCG
0106	GGATACCCAGGTAATCACCA
0107	CCTGACCTCCTCACATCCGG
0108	TGATAAAGCAGGGCACTCAA
0109	CTGTAACTCGATGCAATACA
0110	CTGCCCTCTGCAATGAAACG
0111	CCAAACACTTGACATCCACG
0112	CCACTCCCCGTGTTTTACGG
0113	CAATGGCTTACCATGTTAGG
0114	TCTTCTGTACGTGAATGCAA
0115	CGGGTCCATATTCCAACGGG
0116	AATGTCTAACCTAAGTTGCA
0117	TTAACCTGTGTGTAGCCGAG
0118	CCGGCACCCATTCATCAAGG
0119	CTACACACCCAACAGTTCAA
0120	ATGGACCGTTTACCTCTGCG
0121	CATCCTCGTATCCTGTGAGA
0122	TGAATTTCCTCGAATTCGCA
0123	CTGCCTGCCCGGTCTCCCCA
0124	CCAGGCCCCCGGTATACACG
0125	GCACCCATAGGCAAGTCACA
0126	AAGAATAGCCTATAGCGAAG
0127	ACACAGTCATGCTCTCAGGA
0128	CGTCCGTGTTACATACCGAA
0129	CCAGTATGTTCTCCTAAGAG
0130	CTACAGTAACAACTATAACG
0131	CGGCGGCGAGACCATTCGAA
0132	AATTGTCCTGCGCTATTAGA
0133	ACGTCCACTTCTCAGTTAAA
0134	CTGAAATTTCCATAACACGG
0135	CATGATATAAAAGTATTGAG
0136	CAATCTCGTTAGTAACCCCA
0137	CCTCATAAATACTAACCACG
0138	GATCAGCGTTTCACGCCGCA
0139	CAAATATGCTCAACTATACA
0140	CTGCCCCGTACGGCTATCAG
0141	TATTCAAATATACTTCCGCA
0142	CAGCACACTCAAAAGAGCGA
0143	TTAGGAAAATTTACACTGCA
0144	CAACTCCGATCCGCAATGCA
0145	GGTGACATCTCCACTAACGG
0146	CCGCCTGTATCCCTGAGAAG
0147	CCACTGGGACCCTTGTGCCA
0148	ATAGGCCAAGTCCTTCCGGG
0149	GAGGTGCCCTACATGTAGAA
0150	CAGGCATCCAGGTCAACGCG
0151	AAGGTATCCATGTATCTGGA
0152	CTGTATCTACGCCAATAGGA
0153	CATTGAAATCTGTAGTGACA
0154	ATTGGTACTCCGGTATCACG
0155	CAAACCCCCGCCAAGTACGA
0156	CCATCAGTCCCGTCGATAAA
0157	TCGCCTCACTACCATTCGCA
0158	ACACCTCAAAACACGCCGAG
0159	CATCCGATCTTTAAATTCAG
0160	GCACATGACCGTCATTCGAG
0161	GCGGGCTTCGAACAACGCCA
0162	TAATGTGGATTCCCATAAGG
0163	CTGGCACTACCACAATCAGA
0164	CCGCGCCGACACTAACACAA
0165	CTGTGCTGCGCCAATAAGCA
0166	CATAGTGAACTCGTTCACAA
0167	CTGGCCCCCAAATCAATCCA
0168	CTTTCCTCATTTAAATGCGG
0169	CCGGGTTGTACGAAGCCCCG
0170	CCGTTCTTTATTGCTCGCAG
0171	CCAACGTCCGACCCACGCAG
0172	AAGCGGGGTTGATAAAACAG
0173	ATAATAACCGTGTATCCAAG
0174	CAATGTTTCATTGATTGCAG
0175	CGTTGCAAACCACTACTACG
0176	CTTGCTTGTCGCGTTTAAAA
0177	AAATCAAGAACTTAACAAAA
0178	CATCCGTCATCGACTACCAG
0179	TTAACCCCTGTAACACCCCG
0180	CAGATATCCAGTTCACACCG
0181	CTGCTGCTCCTATCGATCGG
0182	TCTGTTATCAGGTCACCAAA
0183	CATTTCCATAAAGTTCTCAA
0184	GAATGAAACACGACATAACA
0185	CTGTAATGTTTATTACGCCA
0186	CTTATTTATACCCCATTAGA
0187	TGATCCCCTCCCGATAGACA
0188	TTGTGGACACAAGTACCGAG
0189	CTTATACCAACCCTACTCAA
0190	CTGCACTACCATTAGACCGA
0191	ACAGACAACCGTACTTGAAG
0192	TTTTTCATACTTTATACCCA
0193	CTGATGTATTTGAAGCCCAG
0194	CCTTCGATACAAATTCCGAG
0195	CGTCAGGCCAGAAAGACGAG
0196	CTGGACCACATTGCAAGAGA
0197	ATGAACGCCGCAGCTAGCCA
0198	GGTTAGATCTTGGCGCCGGG
0199	CGGTGGCCTCCGACTAGAAG
0200	CTTGTTTTTAATATTATGAG
0201	CAGGAGAGCCGTTTGCCCAA
0202	GCACTCTCCTGACAGCCAGG
0203	AATTAACATATAGTGTTGCA
0204	TCTTGTCAAGGGGCGAAGAA
0205	CATGATGAACGTGATCACAG
0206	CATAACCCAGGAATAAAAGA
0207	AGTTACCGCCTACTAATCCA
0208	AGACCCTACTGTGAGTAAGG
0209	AATTTGGACAGGTAGTCGAG
0210	GCTTGTCCATGAGTGATGAA
0211	TTTATATCTTTCTCGCGCGG
0212	CATATTAACTCGAATAGACG
0213	CAGGTATTAGAACTATACAA
0214	CTGTTATATATTCAACCCGA
0215	CAAGTGAAAGAACATTTCGA
0216	AAGCGGACACAACCAACCGG
0217	TCTTGGGCCATACCTATAAA
0218	ATACGTGTTCCGTATCTGAA
0219	CCACACCCACCGACAAAGCA
0220	CTTCATGAACTTAAATCACA
0221	CCATCCACAGGTTCTATAAG
0222	CCTACCAGTGCACAGACAAA
0223	TTTGGCGACAGCCTTCCCCG
0224	AGAGGCTCACATTCACCGCG
0225	CCGCGCTGAATAGTGCCAAA
0226	CCACGCGATCCAGATAAACA
0227	CGAACTCTCCCGGTATAACG
0228	CTGTCCACAAAGGCACACCA
0229	TAACAAGGAACGCTTCCGGG
0230	CCATTGCACCTCCCTCCGGG
0231	CAGTCCCAAATGACACGGCA
0232	CGTCGATCAGAAAAGCTAGA
0233	CCGGGTCCTAGAGTAAGCAA
0234	CCACCTAGCTACGTGTCACA
0235	AAATTCACCACTTTGCCCAA
0236	TTTCATGATAACACTTTGGG
0237	CTACTAGATTTGCTTCTGGA
0238	CCTAAGGCAACCTTGTACCA
0239	CATTTGCGCGCAGAGATAAA
0240	CTAGTTCGTTGTGTGCGAAA
0241	CTGACAGCCCGCAAATAAAG
0242	CCTAATCACTCCTTTTCGAG
0243	TGTCGTTGAGACATATGGCA
0244	CTTAGAAGTCATATTAGCGA
0245	GTTAAGCTTTGCCATAGGAA
0246	CCAACTCTAATGTTGCTCAA
0247	CTAATACTTAGGAAGCCGAG
0248	CTGCGGCCATACCAACCACA
0249	CCAAAGAGATTCATACAGAA
0250	TATTGACCACATGAACCCGG
0251	CTGAGGGGCGGGAAGCGGCA
0252	CTTAGGCCTATGTAAAGGCG
0253	CCAGGTTAACAAAATTCGCA
0254	GGTAGTGCCGATTCACGGGA
0255	CTTGTTGATTATTTGCCCCA
0256	CTATCGGCAGTCCATTTCCA
0257	GAGGCCCAACCCTCACGCAG
0258	CATGCGACCCCTGATACGCG
0259	GAGCATAAATGTTATAGCGA
0260	CGACCGGGCCAAATAAGGAG
0261	TTTACCTTTCCATATACGCA
0262	CGAACGTCAGTCCCTATCCG
0263	CTACCTAAACCCAAACGGGA
0264	ACTTCTGGACATCTGAAACG
0265	CCATCAAGACGTGATAGCAA
0266	CCTCCACATCACCCTTTCGA
0267	CCTGCCAACCCTATACGCCG
0268	TCACCATATCTAGATAAAAG
0269	TCGGCCCTTATCGCGAGACA
0270	CTATCAGGACCTGCAAGGCA
0271	CCTGTATAAAGTCCGATCAA
0272	AAAACCTTTGAGACGTTCGA
0273	AAAGGGATCGTGCTGCTCAA
0274	AATAAATGTCTTGAGAACCA
0275	CTGATAGAACACCCAACCCG
0276	AGTACTAAAGATATTTCAAG
0277	CAACCAATTTGAAAGATCCA
0278	CCAGCCCGAATATCGCCCCA
0279	GCAATTATCACCCCTACCGA
0280	AAGGATAAAGCAGTTAACAA
0281	CTAGAGAACCCTTTTCAAGG
0282	CTGCGGTCTCCCCAACTGGA
0283	AGGGACGTTGCGGCATTACA
0284	CTTGACTATCGCCTTCTAAA
0285	CCACTATGATTGAATATACA
0286	CAGGTGGCTTTCCTGACAGG
0287	GCATATACCCCTATTTCAAA
0288	AGTTCCATAATGGCGTTCCG
0289	CTAGAGCTCCCGCCAAGCAA
0290	CGGATCAGCTTACTAAGGAG
0291	ACAGGGGACGGCAAGTTACA
0292	GGATGTCTCCGAATTTCAAG
0293	CAATTACCACGCGATTCCGA
0294	GCTACGGATTTCCAATAAAG
0295	ATACTTGCCACAAAACTCAA
0296	CTGTACCTAAAGTCTTTAAA
0297	AGTAAAGCTTCGAAATCCGG
0298	CTAGTGTGATGTCCTATGCA
0299	CCGTGTCGTAAATAAAGCGG
0300	GTTGCCTAATGTAAAACCCG
0301	GGTAGGCTACAGCTTTAGCG
0302	GCGCGACGTAATCTGCCCAG
0303	CCATCCCACCGAGATAAAAG
0304	CCAGGGATACCAATGCCCAG
0305	TATGTGGGCCGCACAACCCG
0306	CTAATCCTTGTGTCACAACA
0307	CCAGCTAATACACATACAGG
0308	GATGGGAGTACGAATATACA
0309	CTTCCGCCCTCGGCTTGGCA
0310	TGATGCCAAGTCCTTTGCAA
0311	CAAGGGGCCTAGACTACAAG
0312	CATTTCACTGTCAAGCCACA
0313	CGTTAGCGACGATAACTCGG
0314	CCAACCCATCGATATATCCA
0315	CCAGATTTATGACCTCGGAG
0316	ATATGAACTACGATTTCGAG
0317	ACAGAAGCAGGCGCATTCAG
0318	CGATGGGCCCGGTTTTGAGG
0319	TCAGGGCTCGATTTGTCAAA
0320	CGATAATGACCTCCACAGAG
0321	ACAACCTGACCTGAAAGCGG
0322	CAATTGGACCGCTATACCGA
0323	CCGACGTATAGAACTCGCAA
0324	CTAACAGACGTTACATCAAA
0325	AAACTGGGATCCTAGACCAA
0326	CTTTTCTACTATCTTAGGAG
0327	CCTTCCATTCCGTCATAGGA
0328	ACTGTAAACGATATACCGGG
0329	CCGGGGCCCCGCATACACAG
0330	GCATCTGTTAATCATACCCG
0331	GAGGGGAACCCCGTGCACAA
0332	CGTCTATCCCCGGCTAAACA
0333	TCTACCTGTGGTATGCTAAG
0334	CGTATCGCCATCTAGTACCG
0335	CATTGACCCTTACTGTTCAA
0336	TTTTGTCACGAGGTACTCAG
0337	CCGAGAACTCTCACTAGCCG
0338	TGTGCAGGACCAGAGCCCCA
0339	TTTCCATCTGCGTCACAGGA
0340	CTTAAATATTCGCTGCGGAA
0341	CGTCACTCCACGCCACAACG
0342	CTACATACACGACTTTCCAG
0343	CTTAATAAATTGCTTACAGA
0344	ACACTCGGCAGGTATATGAA
0345	TTGTGCTAAGCGAATAGAGA
0346	CCGAGCCGATCGCTGCCAGG
0347	TTTGCAGCAACCCCGCGACA
0348	CCAATACTTTCGGTTACGGA
0349	CTACCCTCCCACAAGAAAGA
0350	TGATTGACACCTTAGTAAAG
0351	ATGGTCCTTATTCATACAAG
0352	GGTTCACCTTTCATGATAGG
0353	CGGGGCCCCCACCATTCAAA
0354	CTGACATCTACAAATCTCGG
0355	CCATAGGCCACGATAAGAAA
0356	CCAATCGGAAGATAAATCCA
0357	CTTCTTTACCCTATACGGGA
0358	ACGATAGCAGCAGTGCCGAG
0359	GAACCTTGTAGGGCTATGGG
0360	CAGCGATATTGCGTGTGCCA
0361	CGGATCTGTGCGGTGCGCGG
0362	ACGGAAAACTCCGCTTTAGG
0363	CTGACCTAAGCACTGTGCAG
0364	CTTCAGTTTGACGAAATGAG
0365	CGACTCCGCAAGACTTGAGA
0366	ATGCGATAATACCCTAAGGA
0367	CTTCACGTCCATCAAACCAG
0368	CCGACCCTTTTTCCAAGGGA
0369	CATACAAATAAATTATAAAA
0370	TGTTCCTTCCATCTACCGAA
0371	GAAAGTCATGACAATAACAA
0372	CATAACACCAAGAAATTAAG
0373	CTTGGTCTTACCCCGTCACA
0374	CCTGCCGTCATTATTCACCA
0375	CTAGGAGATATAATGATAAA
0376	CTGATGATTACCCCGAGGAA
0377	CGGGCATTCTCCCTGCCACA
0378	TTTCCTATCCCCTCTCTCAG
0379	GCATGCCTATGGCCAAACAG
0380	TCGGTTGTAGTGATTCTAAA
0381	CATCCATCACTCCCGACGCA
0382	CGAGCGATCCACATAATCAA
0383	AGGAGGTTCTATGATCACCA
0384	GTTGGGGAATAACAGCCGGG
0385	CGTTTCCTCTATCATTTCAA
0386	TCGGCTTCTCATACAATAAA
0387	AATTAATCCTGGAAACTCCA
0388	AGACTACCCTGAAATTCACA
0389	TAGCACAAACAAGCAAGGAG
0390	CAGTGATAAGCACCATTGCG
0391	TTGTAATTCTGCGCATACCA
0392	CTTCCCGTTCGCTATTACAG
0393	CCGCACGAACCAGATTAGAG
0394	CATGACAGTTCAGCAATCCG
0395	CATAATTCCTTCTTGCTGGG
0396	CAGCGGTGATGATTAATGAA
0397	TTGATACTTAGACTGTAAGA
0398	CCATTTTTTCCCCCGATAGA
0399	GCAAAACTCGGTATGTCGCA
0400	TGAGTCTGACAAGCTTAAAG
0401	CCGGCGACACAACCGATACA
0402	CGACTTTTTCTGTAATAAAG
0403	TAGGTCCGTGCGGATCTCCA
0404	TCAAGTAAAGGTGTGCACAG
0405	CCAACCCCTACCCAATGACA
0406	CGATCCGTTACGGCTCTGAA
0407	CAATGGCATCCCGCGTGGAA
0408	TTGACTACATGGTTACCCGA
0409	GTACCATACTTAATGTGACA
0410	CCTCCGTTCACAGATACCCG
0411	CTTATTTCTGAAATTTGAGA
0412	GGAAAATAAAATCTACGGCA
0413	CTAGTTAGCTCGTTTTTAAA
0414	CTGCAGGCTTCAAAGCGACA
0415	TTGTAGAACATTGTATACAG
0416	CTTACCGTTTAATCGCTGCA
0417	CTTGGTCACCGGTCGCTGCG
0418	AAAACACACTGGTAACGCGG
0419	CCAATCACATCTGATTCCGA
0420	GTAACGATTTCCACTTGCCA
0421	AGACAACACTGAGCAACAAA
0422	AAATCTACCAAGGAAATACA
0423	CTTAAACCCTCCTTAAAGAG
0424	ACTGATACTGTCCCAAGCGA
0425	GTGGGCTCACACCTTTCGCG
0426	CTTAAAACATGTGCTACGAA
0427	AAGTTCACAACGTTACCACA
0428	CAAGCAATTCCGACGTACAG
0429	TAAGTGTAATTGGTATGCAG
0430	CCTATACCTTAGGCTCAGCA
0431	CGAAAAGGACCTGAATCCAA
0432	GATCGACAATCTCAGTCAGG
0433	GGTTCTAGTGAACCGAGAGG
0434	TCTAGCTTTCTTGATCACAA
0435	CAGCTAATCAGCATAACACA
0436	TAGGTGGCTTACCCTCCCGA
0437	AGTGAAAACCTACCACACCA
0438	AGTTCTCCATACCAGAGCGA
0439	CGAAGACTCTTCTAAAACAG
0440	GCGGCTTTACCCTTACGAAA
0441	TAGTCCTATCACGATCAGGG
0442	ACAACCTTAAAGTTTAGACG
0443	TGTACCCGTGCACCGCGGCA
0444	CCGCCGGAAATTACTAGAAG
0445	CCACATACATAATTTCTAGA
0446	CGGTCTTATTGCATATACAA
0447	TTTATACGTTTAGATAAGAG
0448	CGTTATCCCTTAAAATTACG
0449	CGTTACCGAGCCTCTCCCAG
0450	CATCGAGCCTTAAAATGCAA
0451	ATAGGGACTGAGTAGACAAA
0452	ACGAATTTAACTTCACTCCG
0453	GGACCCATAACTACTCGGGG
0454	TCTTACACTTTCTAGTAAAG
0455	CTTAAGCATTCTGCGTTAAA
0456	TAGAAACAAGCCCTGACAGG
0457	GTAGCGTATGCTCCTATCCG
0458	CTATTTTTTTAATATTGAGG
0459	CTGGACACTGTATCACCGGA
0460	CAAAGACAAACCCAAAAAAA
0461	CCATCCATAACACTGTCAGG
0462	CGGATAACCCCCATTTACCA
0463	GCTCTGCGATAATTAATAAG
0464	GAAACAGGCAAATAGTCAAA
0465	CTTTATTCCCTCTTAATCCG
0466	CCTGTGATATATACTAGCCG
0467	ACATAAAACAAACCAAACAG
0468	CCATTGGGATGAGTTCAGCA
0469	CTTCCCAGTACATAAATACA
0470	AGTCCACTATTCTTTTTACA
0471	AATTACTGACCAGAGTAACA
0472	GTACAGGTATATGTGAAGAA
0473	CTACCCATCCGAATTTGCGG
0474	ACTAGCAGTAACCCGCAGAA
0475	TAGAGCTCTCTCTCACTAAG
0476	GGACGGACTGCATTATAACG
0477	TGAAGGTACGTTCCATTGCG
0478	CCTTTTTTTCCATTTCGAAA
0479	AAGCCCCTTGTCGCGATCCA
0480	TAAGAATCCCTCCTGATGAA
0481	CATTTAAATCTTAATAACCA
0482	CTTCAGCGCCACACATTCCA
0483	TAAGACAACAGGGATTACCA
0484	CTTAAATGCATCGAAAACCG
0485	AAGCAGCACAAAACGCTCAG
0486	CTTTCACTCAATGAATCCAG
0487	GTTTCAGGATTTTTTCGAAA
0488	CGTGCATTCGCATTGTTCCA
0489	CCTGAGTGCTAATAAACACA
0490	CTTGGGCATCCGCCTTAAGA
0491	GTACGTAACCAATTGCCCCA
0492	CAAGTAACTGAGGAACTGAA
0493	CAGCCAGACAACAAAAACGA
0494	TTGCAGACATGAAATATCGA
0495	CTTCGGTGCTACAAGTGAAG
0496	GTGCTATACTTTGCTACGAG
0497	TATGATTGTCCATTTTTGCG
0498	CGTAGTTCCCCACAAAAGAA
0499	CCGCCGTCTATTACATTCGA
0500	CCTCTCGCCAGCCATCTCAA
0501	CGTTAAAGTGTAATGCTACG
0502	GGTAATTTAGAGGCGTACCG
0503	CGTTTCTATGATCAATCCCG
0504	CTAAGACACTAAGTGACACA
0505	AAGGTGATTTAGATACTCGG
0506	TGGCCCTTTGTGTATTCGAA
0507	CTGTTTACCTAAACTTGGCA
0508	CTTGGAGACAGTGCGATCCG
0509	AGTATATTCTCGTCTACGGA
0510	TAGAGATAATTAGTTTGAAG
0511	CGAAAAACATACCAGTAACG
0512	ACTATACCTTTGCTGACGCA
0513	ACACTTTAACTTGAGTAGCA
0514	TATTAGATTCCCCCTTGGAA
0515	ACAACTCCTTTCCTGATACG
0516	CTAGTGTCCCTTGAATAAGG
0517	GTACTACCTGATGTGCAGGG
0518	CTAGTCGATCCGCTTCGGGG
0519	GGGGCCGGATTGGCAATAGA
0520	GCAACGTCTCATGAGAGCAG
0521	GAGCCGCGATTCGCTCCGAA
0522	TAAGACCCTATTCTTCAAGG
0523	CAGTGTCGTTGCTTTTTGAG
0524	CTGCTCCTCGCCTTTACCCA
0525	ACTGCATCTGCCCTTCACGG
0526	CGGGATACAAAACCACAGAG
0527	CTGTTCACAGGGGTGCAAAA
0528	TTTATTTTTAGGTTATCGCA
0529	GCGCTGTCACTGGTGTGGGA
0530	CTAGCACTAGGGTATATCAG
0531	GAATCAGATATCTAGTGAGA
0532	CCAGGGTGTTTGAAATCCAA
0533	CATTTCCAAGGCGAAACCAG
0534	GCATAATTTACACAAACAGG
0535	CAACTTCCTGACGTTTCACA
0536	CATATTCGATGAAAATAGCG
0537	CAAGGTATTGAGGCTAAAAG
0538	TGACACCCTACTCAACCCCG
0539	AAACAGGTACCCTAGCAGAA
0540	CCACGAAAATAACTAACCAA
0541	CCGGTTCAAGCATCAAAAAG
0542	GTTTTACAAGCGACGTACAA
0543	ATAAGCACTTCACAAATACG
0544	CTTTTTGATTTTTTAATCAG
0545	GGGCAAGGTGCACATCCCAA
0546	CATATACCATCACTTAACCG
0547	TTGTGGGTCGGTAAAAGGCA
0548	CATATGTTACTGACATGAGG
0549	TGTCCGACCAACGATTAAGG
0550	CTATGACCCCAATTACGCCG
0551	CTTGTATATCTTTAATCCAA
0552	GCATCTGCCCCCTCGCTGCA
0553	TAGCGACTCAGATTTTGACG
0554	CAATTTACCCATTTTCCCAA
0555	AAACTCATAAGGGCATTGCA
0556	CAGGATTATTATCAATGGAG
0557	ATTCGAGGTCCTTAGACCCA
0558	GTACACCAACCGGTATACGG
0559	CTTTACTGTATTTATCCGCG
0560	ACTGTACATGGCCAGATCGA
0561	CTATGCATATGCGATCCGAA
0562	CCAACAACAGTCCATTCGAA
0563	CAGCGGTGCTACTAGACCAG
0564	CTTGTGCTCTTGTAACAACA
0565	GCACCTTTTCTATTTTGGCA
0566	CGGGGGATATCACCGTGACA
0567	CCTTGGACTCGATTAAGAAA
0568	TATATTGATACCATATAGAG
0569	CGAAACACATTCATGTAACG
0570	CGGATCGTTAGCTATTCACG
0571	ATTGCCATTAAGAAATTAAA
0572	CGTTCTATAAGAGCTTAACG
0573	AATAAGCCTCCCCAGCTGAG
0574	CTTACAACTCTCACTACGAG
0575	CTATAGACAGACCCTTGACA
0576	GGACAAAGATGTTTTATGAG
0577	CCAAAAAATAGCATAAGCGG
0578	CTGCCAAACTAATCAACACA
0579	ACATGTAAATGCCTGTAGGA
0580	CCAGAGGGCACTTAGCGACG
0581	CGGAGTGTAATTTATTCCAG
0582	CCTTAGGCAGGGCTTCTGGA
0583	CTTGTTTAATACTAACAACA
0584	CCGTCCTACGCGCTTTTCGA
0585	GCAGTAAATGTGGTGAGAGG
0586	CCTCCCAGTAATACGTAGAG
0587	CTTTCCTACAAAAATATACA
0588	TGAAACCGTCCTGCATCAAG
0589	ACTGCGAATCTTCAGCCAGG
0590	GCTGCAGCCTAGCAAATCAA
0591	CGACTTTCAAAATAAAAACA
0592	CGTGTAATATTCAAGACAAG
0593	TAATGAACCCCAATACCGAA
0594	TCTGAGTTACCCGCTTCGGA
0595	CTTCAGGTTTGTCAACACAG
0596	CTACTCCTTGTTGAAACAAA
0597	CTAAGAAACGAACCATACAA
0598	CTATCACCCGCGATGATCAA
0599	CTGCTCGATAGTGAGCCCAA
0600	ATTGCTGCTCAACATCCGAA
0601	CAGGGCCAAACCGTTTAAAA
0602	GAATTTGATTATACATGCAA
0603	TCAGGGTGCTCGTTGTCGGG
0604	CGTCGCAAACAACAGAAGGG
0605	AAGCAAACTTGAGCAATCAG
0606	CAACTCCAAATTGTGCTCAG
0607	GCGACTACCAGGCCAAAGCG
0608	GTTACGTGCCAAGTTTACGA
0609	GTGACGACAATGGTACGCAA
0610	CGAACTACATCCTAACCGAG
0611	CGGTTCCCTAGCGCACTAAG
0612	GTTCCGGGAAACCCTCTAAA
0613	GAACCTAGCATTCATTTGAA
0614	CATGAGAGTAGAATTCTGAA
0615	ACTATCCCCACCCCTCCACG
0616	CCTTCACGACCTTAACTACA
0617	GTTTACACCTGCGCTAACAG
0618	CCTCCCTCTTTAAAGTGGCA
0619	CCATAGTCCCTGAAGCAGAG
0620	TTTTCCACCGCGGAGTTAAA
0621	TTGGGCTCTATGATATACAG
0622	ACATGTCAATCCAAATACAG
0623	GATCCTTAAAGCCATCCGCA
0624	CATTTCCTCCAATCACCAGA
0625	CTGTTTTAAAAGCTGTAACA
0626	TAAAGACCCATACAACCCGG
0627	TAGCCCTCCTCGCAGTAAGA
0628	CAGTATAACCTAGTGAACGG
0629	ATTAACAATATCCAACACAA
0630	CCATCTCCAACCTCTAGACG
0631	TATTTCACCCCCAAACCCCG
0632	CTGAGGTAAGAAAATCAAAG
0633	TCTCCCAATACTAATATAGA
0634	TCTGGGACTCGTTTATTCGG
0635	CGTGCCTGAGACAAACCCAA
0636	CCATAAACATCATCATAGAA
0637	AAGCCCAATCCTCAACCGAG
0638	CTTACAGACACTTAGCACCG
0639	TCTTTGCAATATTCAAAGAG
0640	CCGGTTCAAAATAAATTCAA
0641	AGGGTGTCAGCCGATTACCG
0642	AGGTTAATAGGATTGATGAG
0643	GCTAGTAGTGACTAACCCAG
0644	CTTGCCATCCCGCATCCCGG
0645	CCATCCAACACGCATCCAAA
0646	TCATGGTTACTTGCTTAACA
0647	CCTATCGTTCGAGCGTAGCA
0648	CTTTGGGAAATAAAGCAAAA
0649	ACATCCGGTGCTCAACGGAA
0650	CCACACATTTATATTTTGCG
0651	CGAAACGACTGAATAAACGG
0652	TTTGTACATTGCCTTTGCCA
0653	TTAGTGCCTATGTATTGACA
0654	CTAACAGGACAAAATCTCCG
0655	AGTTAATGATTACTTCTCAG
0656	CGACGACGAATCTTTTGCAG
0657	CGACTCAATGTCAAATCAAA
0658	CTATCCCAAGTTGATCTACG
0659	GCGGTTTGCAAATTGTGAGG
0660	AAACACTCACCTGAAATGCA
0661	CGTGGTAAAAAACAGTCAAG
0662	CAACGGGATCGCTCGATCAG
0663	TTGGTAATACCCCTTTGGGG
0664	ACACATCGCCTAGTAATCGG
0665	CGAAGTGACCGGTCTAGAGG
0666	CGTAATAAAAGGTTATTCGG
0667	CAAGAAACCATCCCACCAAA
0668	CAAAGGGACCAGCAACGAAA
0669	CGGTTCCCATTTAATAAGAA
0670	CGGCTTCTATATGTAAGAAA
0671	CCGGGCGAAGCCCAATACGA
0672	CAACCTGCAATCTATACGAA
0673	TTGTTATTAATCCTACTAAG
0674	CCTGTGCCACTCTTGTTGGA
0675	CAAACCTGCCGATCGTGAGG
0676	AGACTCATTCAACAGCTCCG
0677	TGGAAATCAAAGAATTTACG
0678	CCGTCGTATTGTACGAGAAG
0679	AAATTGCACCAACAGTTCGG
0680	GCAAAGGGAGAGTCTAAAAG
0681	CCGGTGCCTTACCCATCCAA
0682	AGTGTCGCACCACTACCCAG
0683	CGGCCGTCCCCGAAAAGGGG
0684	CATGGTGATATTACGAACAA
0685	AATCACTTTGCACCGCAACA
0686	CCTGAAGCCCGGATGACGAA
0687	CGTGCCCGACTCTTTAAAGA
0688	ACATAAGCATTGTTGTTCAA
0689	CGTGACACCAATTATACCCA
0690	CCTACGAATCGGGCGAGACG
0691	CAATCTATTTCACCAATACG
0692	CAAGTGCCAGAAATGCTAGA
0693	CAATTGACCCACTTGCAGGA
0694	GTTTTGCAAGGCGCTAACAA
0695	CCTGTTGCCGTCGCGTTACG
0696	ATATTCCACATTACACGGCA
0697	CAGCGTCCCGAGGAAACGCA
0698	CAGTGACCAACCATTCGCCA
0699	GCACCTTGCAACACATTGGG
0700	CTAAAGTATTGTCCATGAGG
0701	AATGTGCGAGATATAACCCA
0702	ACGTCTTTTCGTATGCCGAG
0703	CTACACCCACCCATTAACGG
0704	CCTAACTGTAAAATTAAAAG
0705	CCAAACGTCATTCAGTACAA
0706	CGTGACCATCTTGATTCGCG
0707	ATACAGTTCGGTGAAAGCCA
0708	CGTGGAATCCTTAAACCGAA
0709	AATTCGACCCATCTAATGGA
0710	CGTCGGCTTAGCGTTCGAAG
0711	CGAGTTACACGACCACAGGA
0712	CTTTTAAATAGCTTTCCCGG
0713	ACAGGACATGGGAAAAGAGG
0714	GGTACCTCACCGCCTTTACG
0715	GGATATAAAACAGTATCAAG
0716	TCAAATTAATATCAGTAAGA
0717	ATTTGGCGATACGATCTAAA
0718	CTGTTCGGTCCCGTGTGACA
0719	GCACCTATCATCGCATTCGA
0720	CTAGGTGGCGCAAAACGCAA
0721	AGATCAACCCTGACTACAAG
0722	AAGTAACCTATCTTATAGGG
0723	TGATCTTCTTCCTATTTAAG
0724	GTAGGTTGCCCCCCATGACG
0725	CTGCCTCGCTACAAATGAAA
0726	TCACACATTGGATCGCAGGG
0727	CTAGATAATGCCGAACCCCA
0728	CTGTTTTGATATAATCCGAG
0729	CCTCAATAACAATTAAAAAG
0730	GTATCACAATGTTCTAGGGG
0731	TCGCACGTACAATTGCTCGA
0732	CTGGACGAACTACCTCTAGA
0733	CATCATGTTACGGAGTACCG
0734	CGTGCGCCCTGAGATTCAGA
0735	CAACATCCCGCCTTGTCGCG
0736	CATAAGCGACGGAATATAAA
0737	ATGGCTTCTGAAACGATCCA
0738	CTACCAATTTGTTTACCGCA
0739	TCGGTCTTACAGTTAATAGG
0740	CTACTTAACCTACCGCCACA
0741	CTACAAACCGGCCATAAAGG
0742	CGTACAGTCTGCACTTCGAG
0743	CTAGTAGACCCCCCTCGCGA
0744	CGTCTGAATGATTCTCGAAA
0745	CGTAGACACGACTCACAAGG
0746	ATGGACCATCACCAATAAAA
0747	TGAAGCGACTCCCTTAAAGG
0748	CTATACTTAAACGTAAGAAA
0749	TCGGTGCCCATCATGAAGCG
0750	ATAAGGCGTATACCATGAGG
0751	GGGTTGCCCAAGCCGCACGA
0752	GAACTCAAACTGTAACGGGG
0753	AATACTCCCACCCTTTGGCA
0754	CAGTATGTCAGACAACCAAG
0755	TTTGCTCCCCTGGATCCAAA
0756	ATTTATACAGGTATGACGGG
0757	TCTGATTCTTCGAAAATACA
0758	ACAGAAGCCTAGTATACCCA
0759	TCTGAATCTTCGGTTCACCG
0760	ACGTTGAAAAGGACGCTCCA
0761	CATTACTGCCACCCTCAGAG
0762	CCTCTCCGTGAGTATCTAAG
0763	CAGCCTCTCATGGAGCCGGG
0764	CCGAGGAGTACCGATATCAA
0765	CCAAAGGTCACGACTTTCGG
0766	GATAACAACAGTGTTCGGAA
0767	CGATGTATTCACACTAAGGG
0768	CCAGTGGCATCCCAGACACG
0769	CTGACCATACCCAAGATGCA
0770	CAGTCTAAAAGCCTAATAAA
0771	CAGCCCTAATTCTTGCCGAG
0772	ACGCGGCCCAGGATGTTGCG
0773	CAAATGATTAGCGCTTTCAA
0774	GGGACTATACTTACGCTACG
0775	ACACCCGGAGACCATAAACA
0776	GCTGGTCACATACATATCCA
0777	AAGCGTATAAGCGTGAGGAA
0778	AAGTTAAAACCTACATGGAA
0779	CGTCCAAATATGAAGAGGCA
0780	GGTCCTAACTCCCCACTAAG
0781	ACTCCTCTCGGTACAAGAAA
0782	CAGTCCCACACTCCGTTCCG
0783	CTGTTACCTCCGAAATGCAG
0784	CTAGGTTTCCCATCACCAAG
0785	GCGTTGCAAGTTGATTTACG
0786	CATCACGGTGCACCAAGGAG
0787	CCATGACCATGCGCGCCCAG
0788	GCATTAGTACCAGTTCACGA
0789	CCTACTCCTCAATTTCACCA
0790	CGACGCTGAGCTGCACTGGA
0791	CTAGTGGGTCTCAATAGAAA
0792	CGTGCGGGTGAACTGATAAA
0793	CAGAACCCAAAGCTTATGAG
0794	CTATTTTAACCCCCGCCGCA
0795	CTTCCTTATGCTCTATGCGG
0796	GCTACACCTATTTTTTAACA
0797	GTTCCGAGCATGCTGCAAAG
0798	CAATGTGAAAAATATATACA
0799	CTACTTCCTCTTTAACCCGG
0800	TAAAGCTAAATACTATGAGG
0801	CATTACCTAATCATGAAAGG
0802	ACGTTGCAAAAGAAACACAA
0803	AGGATGACAGATCTACTGAA
0804	CCATACGTTCTAAATTGAAA
0805	CTATAGGGACTGGAGTACAG
0806	GTTGCAATACCACTGTCCCG
0807	CCGAAAAAAACGTTGCGGAA
0808	ACATGATACCCTTCTTGCGG
0809	CAAGGAGGAAAACCAAGACG
0810	CTACTACTTGTACCATGACA
0811	CTACAACCTAAAACACCCCG
0812	CTGATTACATGCGAACTCAA
0813	CGTCTGGCACATAAGCACGA
0814	ATGACTAACAGGCCAACCAA
0815	AAGCACACTTTGCCGCCCCA
0816	TAGGCCAAATGGGAGTAGGA
0817	CTTAGCCACGTTGCATTACG
0818	ACTTAGTCTTTCCTGTACGA
0819	GCTACAATAGCTGCTCAGAA
0820	GCTGGTTCACCGTAGCTAAG
0821	CAGACGAGATTCGCACGACA
0822	TCTTAATATTTATATCACCA
0823	CTACCCGTACATATGTACCA
0824	CGTTACCCCCCTTTATCGCG
0825	CATTAAAGAGCCCTATCACG
0826	AATCTGGCACTAAATCTAAG
0827	CGAAAATTACCCCTATCAAA
0828	CTAAGGCACTCCTATAGCCG
0829	CATGTAATTGCGAAGCCAAA
0830	TGTGCGCAACCATAACAGGG
0831	CGAGACCCATAGTATTAAGA
0832	CCTATGTCAATATAAATAAA
0833	CGTACTGATCTTACAAGGGA
0834	GGTTTGGACAGCAAGAGGCA
0835	CGAAAGAGTGATCCAACCCA
0836	GAATACCCTGCTGAAAAGGA
0837	CGTGCAGGCCCCTAATTGCA
0838	ATGGAAACACGCTTTAAGGA
0839	GTGTCGATCACTGCGAGAGA
0840	CCTATACCCCTATAATCAGA
0841	CCTCGGTCCTAAGTAAAACA
0842	TAACCAGATTGTCTTCTAAA
0843	AATAAATCTGTCACAACAGA
0844	GGACTATCAGCAAAGTTCAG
0845	CAGTCTTGTCATTCATAGAG
0846	CTATAACTTTACACACCAAG
0847	CGATCTAACTGGCTACACGG
0848	CGGTGAAATCCCATTCAGAG
0849	CCTAAATATCGCCCTACACG
0850	AGGGCCAGCTACTATATCCG
0851	AGTGCCGCAAGCCTTACGAG
0852	TCGCGCTAAAATAATAGAGG
0853	GTACTATGAGACTTTATACA
0854	CAGGTACTCCCTCTTCCAAG
0855	CGTCGCGGTCTCGTTACCCG
0856	GCAGAAGGTAGTAAGCCAAG
0857	CTATTGACAGACTAATCCGA
0858	TTTGGGCCACCCTCTATCCG
0859	CAAGGCTTCGGTCTGCAGGA
0860	AATGCTCTAGGGACTATGGG
0861	CTGTCCAGAGGATTAAGGAG
0862	CTAGCATCCCGGACTTCCAA
0863	CGATGAATAGGGACAATAAG
0864	TAAGCCTCCTTGCCACTCGA
0865	CCTTTGCCAAAGAAAAAGAG
0866	CATGATCTTGCCAATAAGGA
0867	CTAGGATCACCTTATCAGAG
0868	CGTGACCCTTCATCGCGCCA
0869	CCTGTGTACATTCCATTGGA
0870	CAAATCCTCAACTATCGGCG
0871	CTACGGCGAATTAAACTCAA
0872	CGACGAACTGACACGTAAAG
0873	CAAGAAGGCCCCGATTAAAG
0874	TGTCACGATAATTATAGGGA
0875	CTATTCTTACTATTAACCAG
0876	CTGCGCCAACAAACGAAAGG
0877	GCTGTACATTTGTAACCCCG
0878	CTTCAGTGTATTATTACCGA
0879	GGGGGTCGCTTCACTTTACA
0880	GAATGCAAAGCTACGACGAG
0881	CATACTCGTTGAACGTTGAG
0882	TAACAGGTCGGCGAATTCCA
0883	ACATCGATATGACAGTCGGG
0884	CATGACACAGAACTAATGAG
0885	GTTCGGTAAGTTTATCAACG
0886	GCGCTCCTTTGGACTACAAA
0887	CCAATAAACTTCTCGAAAGA
0888	CTTCACTAAAGTGTATCACG
0889	GATTATCTAAGGTCTAGGAA
0890	CGGCGATGACGTAAAAGGGA
0891	CGGCGGCGAAGTTTACCAAA
0892	GAACTCTCCAGGAAACAGAA
0893	CTAACGAGCTCTCTATGCGG
0894	CAGCTCATTTCTGTTTAGAG
0895	GGTTGTTACTCGTCTTCACG
0896	ATAGGGCATGATTTACACGG
0897	TCTAAGGTAAAGTTTATAAA
0898	ACTTCTGCTATCTTACTGGA
0899	GTATCCTCTGTGATAAACAG
0900	TTACCTTTTCAGCTTACCAG
0901	AATACGCTAGTAGTAAACGA
0902	CAACAAACCACGTTAAAAGA
0903	CCAAGAAACCGTGTGCCGAG
0904	ATGTCAGGCGGTCCAAGCAA
0905	TCGCAGTCTGCTCCAATCAG
0906	CCTCAAGGTCCCCCATAAAG
0907	CAACCAAGTAATATGTAGCA
0908	CCGCCTTTAAGCTTGCAAAA
0909	CGACCCTTACCCTTTAACAA
0910	CAGAAACATCACTAGAAGAG
0911	CGTTCCCCTTAAGATTACAA
0912	CGACTAGGACCAGTAAACGA
0913	CTACGCACCCCATAGCTGCA
0914	CTTATGACTATGACATGACA
0915	CGTAGCCACCACGATATACG
0916	ACTGATTACGGGCAACCAAA
0917	CAAGGTAATACGGATCGAGG
0918	CAAGGGTGACCGCATCGGGA
0919	CGGTCCAGAAGGCCACCCAG
0920	GAAAAGTTCCCCTAACCCCA
0921	CTGTTTTGACACGCACAGGA
0922	CTACATCCTAATAATTGCCA
0923	ATAATTTCCACGTCTATGAG
0924	CATATGTTCTTATTTCCGAA
0925	ACGTGCATAACACCATTACA
0926	CATGTTTGCACGATGCAGGG
0927	CCGTTCACTGTGTATCAGAA
0928	CGACCGATTGTCATAACAGG
0929	CTAATGATACGCGAGCAAAG
0930	CCTAAGGCCCGCAAACTACA
0931	CGGGATCTCTGCAAGCCAGA
0932	CTGCCGTGTTCCATACTCGG
0933	GGACCTGAAAGTGAAACCCA
0934	CTACCACGCCGGCTTCACCA
0935	CTAGCCCTAGATCAACTCCG
0936	CCAGTGAAAACACTTTTCAA
0937	TGTCATACTTACCAACAAGA
0938	GTGATTTTTCGTGCTATAGG
0939	CCGAGTGACAAACATACCGG
0940	CGGCCGACACCCGAGTCCCA
0941	ACAGGACGTTGTTAATACAA
0942	TCTACGGTTATGACGTAGAG
0943	CCACGTCCCTGCGCGTGAGA
0944	CCGCTCTACTTCTCGCAAAG
0945	TGAGCCCATTAACCTCCGGA
0946	CTACGTCCTTGCACGATCAG
0947	CTACTAATTGATCTGAACAG
0948	CTGACGAGTACTGAGTTACA
0949	TGTAACCTCACGTCACGAAA
0950	ACTCCTTGTATCTTTAAACG
0951	ATGAACTCCTACGATAGCAA
0952	CCTTCCGCATAATCTTTCAA
0953	CTACTGACATTTGCGCTGGG
0954	TTGGGGGTCTCGGCATGACA
0955	CTTTCGACCATCCTTACAGG
0956	GCGATAGGCCATCTGAAAAG
0957	GAAATCCGAGATATTCGACG
0958	TGGGATAACGCAACTAACGG
0959	CGATAGAGCGATGAATGCCG
0960	GAAGCTACAAACTTGATACG
0961	GTAACGACAGCTCAATCCCG
0962	TGTTTCTCCATTCATCCCAA
0963	CTAGTCTATAATGCAAAACG
0964	AAGATTATCCAGAAAATAAA
0965	CGAAGAAATCACGTGAGAAA
0966	CCACCTTAAACTCCTACCCA
0967	AATAGGTTCTTCCAATGGCA
0968	TCATGACTACCCGTAATGCA
0969	ACGCCTCAAAGTACTAAAAA
0970	CTGGTTAATAATCCATAGAA
0971	CTGTCAAGTTAAATACTAGG
0972	AAAGTTACCTTGGAACTGCG
0973	CGATTCAACACCGATATAAA
0974	GGGGATCAACTATTATCACA
0975	TGGCTTCAAATGGATAGAAA
0976	CTTTACAGCCATGCATGAGA
0977	CAGTACAAATCCTCGCTGGG
0978	CATGATCTATAGATTACGCA
0979	CCTGATACAATATCTATAAA
0980	CAGCGACGTTTTAAGCAGAA
0981	GCGGGGTAAGTCCAGTAGAG
0982	GCACTCCACGTTCCTCAGGA
0983	CGAGCCTCTGTCGAAAAAGG
0984	TTGCTAAGCGCGTAGAACCA
0985	CGTGAGGTTATGCAGAAGCG
0986	CAAAACCACACTGCGCCCAG
0987	CATCATCCCGAGGCTTTCGG
0988	CCTCGCCAAACGCCTAAAAG
0989	CAAGTCAACTCTGTGACGGA
0990	AAGAACTCCAGTGCATCAGG
0991	CCTTCAACCGCATTACCAAA
0992	CTTAGCTTTATCAAACACAA
0993	TTGATGGACTCATTACCCCA
0994	ATTAGGGCCAGTCTGACCGG
0995	TCGTGTCGACTGCATTAAGG
0996	CAGGGTGCCCATTCTAGGGA
0997	CTTACTCGTACGACTCTCAA
0998	CGGTTCGCCCTCATTATGAA
0999	CAACTATCTCACCTGACGAA
1000	CTGAGTTTCCTAAAATTAAG
1001	CATTGGTTAGCACTACCAGA
1002	CGTACAACTGCCTATTACGA
1003	CATAATTATTCCTATTCACA
1004	CTAGGGTGAGACGCTCTCCA
1005	TCAACGGGAAGAGATCTAAG
1006	AATCGAAACTAGGCGACACA
1007	CTGCTATCCCTATTAATGAA
1008	CGGGAATACTGATCACTGCG
1009	GCATGTTTACTAATAACGGA
1010	CAATTCTGATGTCTAAGAGA
1011	TAGTTCATCTCCCATCTAAA
1012	CTTGCACCAGAGCCGACAAA
1013	TCAAGAAATTATCAGAACAG
1014	CGTCATATCGCTACTTAAAA
1015	CTAAAAAGCCTTGCGATGGG
1016	CTAGAATTACACCAACCAAG
1017	CCATTGCCAGGACAAAACAA
1018	TTATGTCACCAAAAACGAAA
1019	CTTCACGATACTCTGTCAGA
1020	ACTATCGAACATTCATTAAA
1021	CATGTCGAACCGATTCCCGG
1022	CGTCACTTACTGAAGTGGAA
1023	TAGGGAAGCCCTGTGCGAGA
1024	GTTCATCACCCCACATGCAG
1025	TGGCACCCTTTCGAATAAAA
1026	CCACATTGTGACTTTTAGCA
1027	ATGGGGCTTGTCGCAACGGG
1028	CAGGGCCCAACCGCTTCCAG
1029	ACACAGTAACCCCCTAAGAA
1030	CATTTTCCAGACGCTCAGGA
1031	TCTCTGCATGTACAGTTCAA
1032	AGGAACAGTGAGGAAACGAA
1033	CATCCACATGCTCCGCAGAG
1034	GAGCGACAACGGGATCCACG
1035	CTTCTTCGAAAGGAGTAAGG
1036	CAACGGGTCTCTACATACCA
1037	CCACACCACATGACAATCCA
1038	ACAATCTTATTCTTGCTGAG
1039	CTGCCTGCTGGCTCAAAGCA
1040	AAGTGCACCATGGTATACAG
1041	GCGACTCTCCAAAAGCGCAA
1042	CAAAACACCGCGAAATTCGA
1043	AAAGGGCGAGCCCTGAAACA
1044	GAGTTTCGCAACTAGAGAGA
1045	CCTGGTTTCACGCTACTACA
1046	CCTCGAGCATTTATGAACGA
1047	GCTTTGGTCCCCACTAACCG
1048	GGACACTTTCCTCTGCGGAG
1049	GGTTCCGAACAGAAAATGGG
1050	TTGTAGCTACCGAATACCCA
1051	AGTCTGGTACCAATATCCAA
1052	CGGCCTCTCATGCCTTGGCA
1053	AAGGGGTTTACATCGACCAA
1054	TGACCACGACAACCTAGCAG
1055	ACTCGATTCGATGTTTCACA
1056	CGTACCACTGACTATTAACA
1057	CAAGGTCCCAGATTTATCCA
1058	CGTGTGGACCATCTTTCCAG
1059	TAGACAATAACTGAGCGCAG
1060	ACTTTACATCCCTCGACAAA
1061	TGTACGGGCTAATAAAGAGA
1062	AGATCGTATAGGCCGCACAG
1063	ATGTATTTCAGCTAATCGCA
1064	CAAATGTACCGGAAGCACAG
1065	GTACTCATATTTCCTCAGGG
1066	AATTCCTTATGCTCATACAG
1067	GGGCTGAACTGATCAACCCG
1068	CTGGAATCTTCAAAAAAACG
1069	CATTACGTAGTTAAGATGCA
1070	ATGACCTTTTGGACATAAAA
1071	CCTCTTCCTAAAGCGCACAG
1072	CCTATGCCTAGTAAGTAAGA
1073	AGGCACGCTACGAAGCAAGG
1074	TCTCACCCTAGCCCTATAAG
1075	CAGGTAACTTTTTCTCCCGA
1076	CATTAGACCGGTATTAGCAA
1077	CGTGTCCGATATAAAAACGA
1078	CCGGAGAGTCCTCCTACACA
1079	CCACATTCCATTTCTCGAAG
1080	GTGCGAAACAGCAAACCAAG
1081	CTATAGTAACGTCTACAAGA
1082	CTAGTATCTTTTATGTTCAG
1083	TAGGGATTACGTCTATCAGA
1084	ACTTACTCAACTTATTGCCA
1085	GGGTGAACCACGGTTTGACG
1086	CCGCCTTTCAGTCATTCACA
1087	CAGGGCACAACGCATCACAA
1088	CCGTTACCAAGACTGTGAGG
1089	CCGCACAGATTACTGTCAGA
1090	CGAAACCTTCAAGATCACCA
1091	ACTAACCGATCCTCTAGCCA
1092	CTACTCCAAATTATTTAACA
1093	CCACTACCACCGACATCACG
1094	CATCTCTTTAACACATAACA
1095	CAAACTCCTTCCATACCACA
1096	ACAACCTCCGGGTTAAAAAA
1097	CTTACATCAAAGCCGCGCCA
1098	CGTCGACCTAGCCATACAAA
1099	GGGCTGCCAACCTTTATAGG
1100	TAGCAACTCCCGCTGAAAAA
1101	GCAGACCTACGCCAAACACG
1102	TATCTGTTTCCTCTACCAAA
1103	CAACCATATCCGGTGCAGAA
1104	CGGTCGGGCCCCTAGATAGA
1105	CAATTGCCCATTGTTAGACA
1106	GTAAAACGAGGGCTTCCAAG
1107	CTGGACCAAATGCCTCAAGG
1108	CAGATACTCTTAATTCGAAA
1109	CAGCGGTTATTTCCTCCCCG
1110	CATCTAGACAGACCTCCAAA
1111	CGATTCGTTCGGCCATCAAG
1112	AAACTGCACAGCCAACGCCG
1113	CTTGTGTAATGTTAACCCGA
1114	ATTTCGGCAGCGGTACTAGG
1115	CATAAATCTGGTCAAAACAG
1116	CCTCGGTCACATATGACGCG
1117	TCGCCCTCAATGGAAAAGAG
1118	TCTCCCAATAGGAATACGCA
1119	CTTCTCATTTACAAGTACGG
1120	CCTACCCCACCGAAATCCCA
1121	CAATACGGATACACTTAACA
1122	GTGAACTCTTACTTATAGAA
1123	ACTCCTTCATCATATTTAAG
1124	TTAGGGATCTACGCTTCCAA
1125	CGTGTTATTCACGAATGAAA
1126	CATGATCCAACATCTCGAAA
1127	TAGCACTGACAACCGAGCAA
1128	AGTCAATCCTCAACACTGCG
1129	CTGCTATTCTAAGTATCCCA
1130	AGGGTCTAATGATTACTCCA
1131	CCTTACGACTACCTTTCACG
1132	GCAGCGGTTTTTGCAACGGA
1133	CTTATGTGCAACCAAAAAAG
1134	GTAAATCTCATGGCACCACG
1135	CGGGACGTTTCAATATTGCA
1136	CATCTACACCAGTTTCCACA
1137	CAAATGTTCCAGAATACGAG
1138	CAGCATCAACCGATATAGCG
1139	CCTCAAGATCTCTTGATCAA
1140	CCTTTGTTCCACTCATCAGA
1141	CAACCGGGAGGAACTCGCCA
1142	TGAACAATTTGACAAATCCA
1143	GCTTTAGACAAAGTTCTGAA
1144	CATACTAGAGTAGATCCGCG
1145	CCACTGAGTTCACATCGACG
1146	AATAGTACCATCTAGTGCAG
1147	TGGTGATAAGTTAAGTAAAA
1148	CCACATCGTTGTATGCAGAA
1149	CAGTATCTAATCCAACTCCA
1150	ACTTCCTTTCCTAAGCAGCA
1151	ACTTGCGAAGTACATTACCG
1152	CATGGCAGCCCACATTAAGG
1153	CTATCGACCACCGTTTTGGG
1154	CCGAGCCACCAAGCATGAAA
1155	CCGTAGACCTGACTACTACG
1156	CCAATGATCCTGTAACCGGA
1157	CGACGTACCACACAACCACA
1158	CAACGCCCACCTCAGAGGAG
1159	AGGGCGGGAAGAGCACTCCA
1160	TAAAATCTTCATTCTATACG
1161	AATGTGACTGTAGTACAAAA
1162	GTACACACAGAAGCATTCCA
1163	AGGGCTAACGTCGAGTCAAG
1164	TAGCCACCCAGGGATTCACA
1165	TGTTTCGCAACGCCGTCAAA
1166	CTTTGGATCAACGAACTGAA
1167	AGTCTGAAATTGCCTTTCCA
1168	AGACACAGTCTGACGTTACG
1169	ACTCTAATACTCGAGAGGCA
1170	TGAATGCCAAAGGCACCAGG
1171	CATCTAATTTCGTAATGCGA
1172	TGGGCGGAACACTTATGACG
1173	CGGAAGTGCCAAATTCCAAG
1174	CTTCTGTTCAGATCACTGAG
1175	GTTCATATATCCCAACACAA
1176	TCAGGGAAAAAGTTGTTAAA
1177	CGAGTCAATTCCGTTCAGCG
1178	TTGATTAATCGCATATGCCG
1179	CTTCGTTGTGGTTCTCAAAA
1180	AGTCCCACATTTACGCCAGA
1181	CAGGACGATCTATCATACGG
1182	CAGTAACCCCCGACATGAGG
1183	CCTTCCAAAGGCTCACCAGG
1184	GTACAACACCCGTTTCAAAG
1185	TGTACGGCATGACATTGGGG
1186	AAGTGATATCTGTCACTGGG
1187	CCACACACCACAGCAATGAA
1188	CTTTAAAATCACTATTGCCG
1189	TCGCCGGCTTGTGCGCGGGG
1190	CATGTGTCCCAGTCTCCCCA
1191	TAGTTCGCCCTTCCGTCGAA
1192	CAAGAGCTACAATAAACGAG
1193	CCTCCAGGCTGCGCTATGGG
1194	AGATTTCCCTGTTCTATAGG
1195	CGGAGATACCACCTGTAACG
1196	CAGCGATGTCTTACAACCGG
1197	CGATGCATCACAACTTCCCA
1198	ATGCCCACCCCCATGTCCAA
1199	CTGTGTGCTAGGGCTTCAAA
1200	CGTCGATTTCAGGTGTAACA
1201	CCACACATTCCCGAGTCCAA
1202	CTGAATCTACTGACTAACAG
1203	CCATCTAATTCGCCTCGACA
1204	ATTCGGCTACTTGCTCAAGG
1205	CATGCAAGTGACCAGACGGG
1206	CAGCCACGTGATATTATACA
1207	CCGCACAACACAATTCTAGG
1208	CTTGTAATTGCCTAAACCGA
1209	CTGAATCCCGCGCTATAACA
1210	CCTGCAATCCTTGAACCGAG
1211	CAAATCACACACAATACAGA
1212	CGGGAATACTCTATAAAACA
1213	CTATCACCCAGTCCGTTACG
1214	AGATTTCCTGAGCCTCGAGA
1215	CGATATTCACCTCCGTAGCG
1216	CGTACTCAATCTTAAAACAA
1217	ACTGAGAGAAACCCAAGGCG
1218	CCGGATAGTTGTCTGACGCG
1219	GGACTCTTCCTCTTTTTCGA
1220	CCGCGATTAAGTCTTTAAAA
1221	CCGAACCCACCTCCAAGAAA
1222	CTTTTTCCCTTACTGATGCA
1223	CGTCCCCATATTCAGCGAAG
1224	CATGCTGATCTATCGCTGCA
1225	CATAGCAGCATATCTCTGGG
1226	CTTCTTGGTACAACATCACG
1227	CAATGTTTTGTCACACCAGG
1228	CATTGTCTAACGGAGTAAGA
1229	TTACGGGCTGCCCCGTTCCG
1230	CGTTTCATAATTATACAAAA
1231	CCGGGAACAAATCCAACAAA
1232	CCTTCCCACGCCCTGCTGAA
1233	AAATTACTCTCGTAAAACGG
1234	TTGCATTCATATTAACTCCG
1235	CGGAATGACGCAAATTGGAA
1236	AAAGGGTAAAACTATCCCAA
1237	ACATATTTAGCATAGAAGAA
1238	CATTTTTTCGCTGAACCACA
1239	CGATACTTCATATTGAAAAG
1240	CTTAAGGTCACCCTGTAAAA
1241	CAACACTCTACCAATCTGAG
1242	CAAGTTTGTGAACAGACCCA
1243	CGGTCTACTGTCTCTTACGG
1244	CAGACCAGATTTACTCTGGG
1245	CTTGATAGCACGTTTCGAAA
1246	TAGGTCTACCCTCAACGCGA
1247	GAATGTTTTGAGACACACAG
1248	ACATCAGATATCAATTAAAA
1249	CATCCTGCATCCGATCCGCA
1250	TAAGCTAACTGCCAGAGAGA
1251	ATTCATAAAATCAAAAAGAG
1252	CCTCACGCTTCCAAAAGAGG
1253	CGAGCTCACCCAAAACCCGG
1254	GATACTCTTCAAGATTTGGA
1255	CTATGAAGAACCCCTCGGCA
1256	TGACCCCTATAACATAGACA
1257	CCTATCGCATGCTAGATGAG
1258	CTGAGGAGTTGCTCGAGACA
1259	CTACGTGATTCGCCATTAAA
1260	CTGAGTAACCACACGTGCCA
1261	CCACATTATGCCCATAACAA
1262	GCACCATATGGCTTTAGGAG
1263	GTGAGCGTACGCCAGACAAA
1264	CTTTTTTTTCTGACAACCAG
1265	CTGTCACCCCTTCTTATAGA
1266	CATGTAGTATATGTTATGGG
1267	GGACCGCTAACCTTGCCCCA
1268	GTACCGGACAATCAAAACCA
1269	TTTACCAAAAGTGAACCGAG
1270	CATAATGAACACCTACCGAA
1271	CATGGTCGTTGGTTTTCGAA
1272	TAAACCCTATAGACGTCAGG
1273	TAGGAGGCTGGTCCACAAAA
1274	TGGAATTGTTTATCGATACG
1275	TCATAAGAACTTATACAGAG
1276	GTGCACATATGGGCTAGGCG
1277	CGAGCCACCGCCTTATAACG
1278	CTATAACAATCAGCGCCCGA
1279	CTGAAGAACGACTAGTCACA
1280	CGACAGATTCCAACACTCAA
1281	ACGTCTGCACATTCGCTAAA
1282	TAGTGATCTCTCATTCCGAG
1283	CCGAAATAAAATGAATCAAA
1284	CTAACGCCTTAAGAACACGG
1285	AATACGCCCCATGCATAACG
1286	CATTATCACCTAATGTTCAG
1287	GGATGGTAACCTGAATCAAA
1288	CGATCCACTACGGCTAACAA
1289	CCTTCCTCCGTTCAACCCAG
1290	GAGTAGAAATTTATGCCGGA
1291	TTGGGTGATACAAAATCGGG
1292	TGTGCTTCAGTAATGTCCCA
1293	GTTGTATCCTTACTACTCGG
1294	TGTCCTGTTAACTCAAGAAG
1295	CGGTCACTTGTTCATCAGAG
1296	CTGTACCTCGACAATATGCA
1297	AGTCACCGAGACATTCCAAA
1298	CCAGGAGGTCGGAAGCTCAA
1299	CCTCCACGTAGGCAACACGG
1300	CGACAGGCACGACTAACCGA
1301	CTGAAAACTAGATAGACGGG
1302	CATCACTATTAACTAATACA
1303	CGGTGGTCTTTGGAACCCAG
1304	TGACCGATACGTATGCTCAG
1305	CTTTATCTCAAACTGTCACG
1306	TAGCCATAAAGCTAATAAGG
1307	CCGTCAGTCAGCTAGCGACA
1308	CCAAATACTACTTCACTAAG
1309	CCACCCAATTGCTATTCCAG
1310	GAATTGAACATACCGCACCG
1311	ACATAGAACGATCTTCTCAA
1312	CCACATTAATCTACAAAGAG
1313	GGTCGACAATCTTTACACCA
1314	CATATTACAGATTTAATCCG
1315	GAATTACTATTGCCTTCCAG
1316	GGTTCATCCTATCAAACGGA
1317	CCTCTAGTTCTAACAATGAA
1318	ACGTCACATTGGCTTACAGA
1319	CTGGATTTACTAGAGTTCAA
1320	GTAAGCTATACCCTGCAACA
1321	GCTTCTCAAACACAGATGGA
1322	CTAGCACTCCCACTTCACAA
1323	CCACCATATTCTCAATTAAG
1324	CGAACACATGGATAGACGAA
1325	AAACACTTTTATATTCCCAA
1326	CCTTTAATCCATTTACCACA
1327	CTGACGTGTGCACTGTGGCA
1328	GCGGATCAATAACAGTACAG
1329	ACATTTCCCAACCAGTCCCG
1330	CAAATGACTGTGCTAACGCA
1331	ATACGGGTAATGACTCACAA
1332	CGTGTATATACGCCGAGGAG
1333	GCAGTAACCCCCGAATCCGG
1334	ATGACATTTTGGGTAATACG
1335	TAGTTATCATGCTCACGGGG
1336	GAGACGAGTACTATGACGGA
1337	CGGAAATTTTGGCAGTGCCG
1338	CAGTTGCATATCAAATTACA
1339	CAGTACCCCAAACAATCCCA
1340	CTTTACCATGTGTAGACGAG
1341	CAGTTCCAAATAGAATCACA
1342	CAACCTTGCCATATGTCGGG
1343	ATTTTAACACACATAAGACG
1344	GGGAGCTAAACGAATAAGAG
1345	GCTATGGGCGGTAATCTGCA
1346	CCGTTCAACACGGTATCGCG
1347	CAGAATATAACCTCTCAAAG
1348	TGGTATGCATGACAATCCGA
1349	GAGAGCTCACCTTCTCCCAG
1350	TCTCACTTCATAAAATCACG
1351	CAGGCCTTCAAGGATTGGAA
1352	GCATGAGTCGGCTTACACAA
1353	TGGTCGCGTAGTTAGCAACG
1354	CGTATAAGTACTCTACGGGA
1355	CTAGGCACAAATTATATACG
1356	CCGTCCCGAACCCTGATACA
1357	TGATCCTCCATTGCGCCGCA
1358	CGTTGTGGCAAATCTACCAA
1359	GCTACATAACGGGTATGGAG
1360	CGGAGGCCATCGGCACGCGA
1361	CTGGCTCCTATACTGATAGA
1362	CCAGTAAGTTCAATACCGCA
1363	CTGACAGATGACGCACCAGA
1364	CATATCAATGTATATCAAAA
1365	GTATATCACTTCCAACTGCG
1366	CCTTGTGCCGGGCATCCAAG
1367	ACACAGGGCCACATTCTAGG
1368	CCGACTTCATAGGCTCAAAG
1369	GCGAGTCGACTACCACCAGG
1370	CAAAAGTGAATCCCGACCGG
1371	CTGGTCTCATCAGATTTCCG
1372	TATACCTTTCCCACGTCCAA
1373	CAGCATAACCAAACTCTCGG
1374	CAAGCAAAATTTCTATTGAA
1375	GGGAGCCTCCTTGCGCTACA
1376	AAACAAAGACGTTTGTAGGA
1377	CAAACTGTAAGCGCACAGAA
1378	GTGGTGTGTGGGACTCAGGG
1379	CTTGTGACAACTCCTTTCAG
1380	CCTTAGCTCCTTCTACTAGA
1381	AGGAGCCTTCCTTTTTCAGA
1382	CAATCGGGAGTTCCTAACAA
1383	AGAATAACTAAACTATTCAG
1384	CTGCCCGGCGGCCAGATCAG
1385	CCTTGGTCAGGTATTCCCAG
1386	CTATGAGTTCAGCTTCTGAA
1387	CCACCAGGAAACAAGCCCAA
1388	ACGGGGGTTGCCGATCTACA
1389	CTAGGTCACTCTCAATCAAG
1390	TCTTCTCCCATGACTCACAG
1391	CTAATTCTCATCTATTCAAG
1392	ACGCGAGACATAGAAACACA
1393	GTGGTCCAAGCAACAAGGCA
1394	CCGCGGGTAGAGTAAACAAA
1395	CGGCGAATCGCAATACACCG
1396	ACTTTCTTTACACTTCGGGA
1397	CTTCTATGCTACACGCTCAA
1398	AGAAAGTTTACGAAGACAAA
1399	CGGTTCGGCGACCCAATCAA
1400	CGGACACGAAGGCTTTACCA
1401	CTGGGTCCTCTAAAGCACAA
1402	ACAATTTTCTCCCAACAACG
1403	CTGTTAATACGAGATCAACA
1404	ACTTGGGACGATGTAAGACA
1405	CCATGCTCCGCTATTCACAG
1406	CAGCGCTACCAATTGACCAG
1407	CAGCACAACTAGGATAGACA
1408	CCTACTTGCGGAAAATTGCG
1409	TAGACCCGTATCCATAGCCG
1410	CAACTTTAAACCACATTGGA
1411	CCGGAAAATAAGAATTAGAG
1412	GCAAACCACAAGGCATAAAG
1413	CTAACGCCACTGACTTCCAG
1414	ACACATGTCTAATTACAACA
1415	GTTATACACATGTAGAGGGG
1416	ATGAACCGCTTGGAAACGAG
1417	AGACGTAATTTGCATAGAAA
1418	CGTTATCTATCCACACTCCG
1419	GCATCGAAACAGCCTTAGCA
1420	TAGGTCAATAGTTAGTCACG
1421	CGGGACAACGCCATGAAAGA
1422	CCATGGGTCCCAACTAAAAG
1423	GGACGCCGCGCTATATCCAG
1424	ATACCCATAGCCGTAATGGA
1425	GCATGAGCTGCACTTTGAAG
1426	CCGCCGGTAACTCAGATCCG
1427	CCAATCAATCTAATGATGAG
1428	CCACAGGAATCCACGTTCCG
1429	GCGATGCACAAATCTAAAAG
1430	CCTGAGGATGGCTAACAACG
1431	CAATACACCATATATATCCG
1432	TCTAACTTACCCTATATACA
1433	CGTTCGAGCTATCTTTACCG
1434	CATACAATCACGGAGATGAA
1435	CATCCCCCAATTCTGCCCAA
1436	CTGAATAAAGACTAAAGACA
1437	CCTCGTAGATGTTCGTTCCG
1438	GAACAGCACTTCCCTACCCA
1439	CCAGGCTCCACCTCTTCAGA
1440	ACATTTAACGAATATTGACG
1441	CTAATAATAATTAATCAGCA
1442	CAATGGAATTGATAGCAAAG
1443	CTTGCGACTGAGCTAATCGG
1444	ACTACCGGAGGTCCTAAACG
1445	CATACACTCGTATAACACCG
1446	AGTCCCTACTAAACGCAAGG
1447	GCTACCGGATAAGAGTCCAG
1448	TGTACGCCCCGACATACAGA
1449	CCATCAATATATATGTCACA
1450	CGTCCATATGATATAATAAA
1451	CTTGGATGCCTCACGAGCCG
1452	CCGGCGTATATAGATTACCA
1453	CTAAATGTATAATTTTAAAG
1454	CCAATCAGTGCAACGTACGG
1455	CTGACCTCTTAACCTAAACA
1456	CCTTGACCTTCATAAAGGGG
1457	TGGATAAACTCGGATCAAGA
1458	TATGAACCCAACGTTACACG
1459	TAGAACAGAGCATAGTAACA
1460	CTATCCACTTCCGAATCAGG
1461	CAAGTATCAACATCGTGAAG
1462	CAATTCCTTTGCGATACAAA
1463	GTGTATATCCTGATGCAGAA
1464	CCTTGCCTAGTATTGCGACA
1465	CAAATCGGCCCGAAGACCCA
1466	CGATACATACACTATAACGA
1467	CGTACGAGATTTAAAAAGAA
1468	GCTCCTCGCGATTCACCCAG
1469	AATTGGTTACTCTTTCCCGG
1470	CCACCAAAAGTATAAACCGA
1471	ATTAATCCCGCGGAATACAG
1472	CCGGCACCTTTAATTCGCGA
1473	CCTGTACCAGAGAAATGCGA
1474	TGGGAACCCTTGAATTTCGA
1475	TAGATGTAAGACCATAACGA
1476	CATAACTCCGACCTTATAGG
1477	CCAACGCATATTACACTAGA
1478	CGGCTACCTTTTTTTACCAA
1479	TAACTCATCCAGCATCCCGA
1480	CGGTAAGTAATGCTTCCGCA
1481	ATTTAAGATTGGCAATCAAA
1482	CCTACTTCATGTCTGTGAAG
1483	CAGATCCGCCTTATGTCAAG
1484	TATGACCCCTCATTGATGAG
1485	TGGATAAAATCCCCGTGGAA
1486	CCAATTGCTGTATCTAAGGG
1487	CGGCAGTCCATTTCTTTAGG
1488	GTTTTCTGTAGGATTTCCAG
1489	ACTATAGCCACCAAATAACA
1490	ACGGTACCACCCCCAAGAAG
1491	AAGCCTTCAAATTCTACCCA
1492	CGTCTCTCCGCATTTACCGA
1493	CGACCGGCTTACGTACTGAA
1494	ACTACTTACCGCCTACCGAA
1495	CAAGCCCCTTATGAGCAGAA
1496	CCACATTTCCTTACTATCCG
1497	CAGCAATCACATGATTACAA
1498	GCACTTCTACCAAATCACAA
1499	ATGATCAACCTACAGTTCAA
1500	CGTGGTCTCATACCTTTAAA
1501	CGGGCTTTACGAGAACGAAG
1502	TATGCAGGAGTAACAATCCA
1503	TGACTACCAATGGTAAGGCG
1504	CGTTAAGCCGACCCTTAGAA
1505	CTTATACCTACACAAAAAGA
1506	CCTCAAAACCGCAATCAAGA
1507	AGATGATTCAGCCTAATAAG
1508	CATGGTCTATCCCTTACACG
1509	CTGCTTCCCCGACCGTTCCG
1510	CTTTACATCTACCAGTCGAG
1511	CTTATGTGAGGGTATAAAGG
1512	CGGGATTCTCCCGAACGGGA
1513	GCTTACTGCACCAATCACCA
1514	CTGCTGTTAACACCGAAGGA
1515	GTGTAGGGTCAACTTAAAAG
1516	GCTCGGGGAATACCGTAGCG
1517	CCAGCCTGATATACTCCGAA
1518	CAGCACACAATCCTTTTACA
1519	AATTGTCGTAAAGCAACGGA
1520	GTTCTACCCTCAATGAGAAA
1521	TTGGACACCGAAGCATAACA
1522	CTACCGATAAGTATATGACG
1523	GCTAAGTAAATGCCACTCGA
1524	AGTGGGTTCATGTTGTCACG
1525	CGTATTATCTATCCGACCAA
1526	TCACTAACAGAGTCATCAAG
1527	GGAGAACATACAGATTGGAA
1528	CCTCGTCACAGCCCGAACCA
1529	CAGACGTGTACAGCAATCGA
1530	GCTTTGTATAAATCTCCACA
1531	GCGTGAAAACACGTTAGAAG
1532	CAACTTTGAGAGGTAATAGA
1533	CCATTACGTTTCTTATAGAA
1534	CGACTGTATTAACTGACAGG
1535	CCTTACTTCACCACATTAAA
1536	TCAACTGGAATCGTATGACA
1537	CGATTCCTATCATAAACAGG
1538	CAAGTCACACCTGTGATGCA
1539	CCGTTGTGCCCCCCTACCAA
1540	CTAGTAGGCTAGCCATCGAA
1541	AAAAGAGCCCACGATCCGAG
1542	AATATAGTCCATATTAGAAG
1543	CTTACATGAATCGAGTGCAG
1544	CGTTCTCAATGCTTGCCGGA
1545	CCACAGATACCCTCATGAAA
1546	CCTTCGGTAGGTGAAACAAG
1547	TTGGCCCCATAAAATTAAGA
1548	CTACAGACTTGGGTGCGAAA
1549	AAGCCTCTTTCCCTAAAGGG
1550	ACACTCAACTAAGAGTTCAA
1551	CCTTAAGTTTTGTCTCCCGG
1552	GAAAAGAGCATCGTATTAAA
1553	GCATACGACCCCCAAAGCAA
1554	TAGTTAGATAGAATACACAA
1555	CGTCATATCCGCGCGAACAG
1556	CCTGTTAAATTTGTACGAGA
1557	GCAGCAAGACCTTTTTCACG
1558	CCGGTGCCCCAATTACAAGA
1559	CCAGGATAATACCATCCAAA
1560	CTAAAACTTTTACTTCACAG
1561	CAATTTTCTTTATATTAGAA
1562	GTACTGCACCTTTCTTCCCG
1563	CCGGACTTCCACCTGACCCG
1564	CTTCAACCACACATACGCAA
1565	CAGTACCCCGCAATACCGAG
1566	CGTCCTAAACAGAAGCAACG
1567	CTGCCACTACCAATTAAAAA
1568	GCTGGGAACCTGGCTATAAA
1569	CCATTCATTAAAGTTCTGCA
1570	AATAGGGCTCCTATAACACA
1571	TGGTTTGGAGGCAAGTGACA
1572	CTGGCTCCATATTTGTGAGA
1573	CGAACGTGATTTTTTCCCAG
1574	GTTCTAGATAGGTATACCAG
1575	CCACATTCCGCAGAGATAAA
1576	CCAACGACTAACCTGCGGGG
1577	GATGTAATCTGCATTCGGGA
1578	TCTAAGTCCACACAGTCAAA
1579	CCACCTCGAGTAATTCGCCG
1580	CGATCCATACGACAGATAAG
1581	AGAAAGCCCGGGTAAAGACG
1582	ACATTACTACCCCTACCCAG
1583	AGACATAGTAAGGATCTACG
1584	TCTCCAATTCTATATATCAA
1585	CAGCACGGTTTTCATCACAA
1586	GATGCAACACGTAATTCGGG
1587	CGTCTGGATGCCTAACAAAG
1588	GAAGAGGACCTATCGACAGG
1589	CGAGGTGGCATACTTCGAAG
1590	ACGTTAGCATGGTATCGAGG
1591	GCTTCGGATCTACCTTTAAA
1592	CTAACCGCAATCCTGTAAAG
1593	CAAGAACCTCTCCTTAGAAG
1594	GTTTGTCATATCACTCGAGG
1595	CTACCTAAAAAGATTAAAAA
1596	CTAGCCACAGTCTAGAGACA
1597	TATTGTGACTTTATAAGCAA
1598	CCTGCTTCACATGTACAAAG
1599	TAAGATCTAAACTAAACAAG
1600	CCACTCGAAATGCAATGCAA
1601	TTATTGCATAGGAAAACCAA
1602	GTAGATCTCACCAAAACACA
1603	CAGACTCGTCATAAGATAAG
1604	GCGCCTGATCACTCTCCGCA
1605	CAATTGAGCACTTAACGGAA
1606	GGACTAATTCAACTATGAAA
1607	CTGACCCTCCCGTTTCCCAA
1608	TATTAAATTCATTTTAGACA
1609	ACGATTCATAGCAAACTAGA
1610	ACTCGCGTAAACATAAACAG
1611	CGATTCATCGATTTTTAAAA
1612	CAATCGTGTCAAACGTTCCA
1613	ATTAACACCTTGATGACGAA
1614	CAGCCAGGCACCCTGACCCA
1615	CATTATGACATTGTTACAGA
1616	CGAGACCTACTAATTTCAGA
1617	GCAACTTGTCGTGCGCCCAG
1618	CATTTCGGATCCCAAACCGG
1619	TGGTTGAAAGTGAAACAGGA
1620	AGGGACAGCTCCGAATCAGG
1621	CTAGTCTTTCCTTCGTAAAA
1622	CTGGAAACCAGGTAAACCCA
1623	TCTACCCCACGCGCATTCAA
1624	ACGAGATACGGTCTATCCCG
1625	CGGTGTCCACTCTTTCCAAG
1626	CTTAAAAATCCCAAACAAGA
1627	ATTCCTATACATTAAATGCA
1628	ATATCTGCAGATTCGACCGA
1629	CCACCTATTAAAAAGTAACG
1630	AATTTGCCCCATCCTCCGGG
1631	TATCGGTTACAAGCATCACA
1632	CATAGGCACGCTCCTATAGG
1633	GCTACTCGATTCCATACCCA
1634	TCATTTACTTTAGCTCCCGA
1635	GTGAAATCACGCCCTATCGA
1636	CCGAACAGTTTCCATTCGGA
1637	CTTTACTCATTACCGAGCCA
1638	CAGAATCATGATCCAACCCA
1639	CTTATTTACAGGCTAATCAA
1640	CATTCTACCCTTGCAAGAAA
1641	ACACCCTTCTAATCTAGACA
1642	CTACCGTCACTCCCTTGAAA
1643	CATAAATTACTGATTACAGG
1644	CTATTTCCCTCGACTAACAA
1645	CTAGGAACCGACGCGCCCCA
1646	CTTTTCATATCGGTGAACCG
1647	CGTCTCGTCGACGTGCAACG
1648	TAAATCTGCGGACAGTCGGA
1649	CATCATGTATACACATCAAG
1650	CCTTACACCTGTACGATAGA
1651	AAAGCGTGACTCCCACGAGA
1652	ACACTGCTACTGAAGCTAAA
1653	ACGGGCCATGACCTAACGGG
1654	TTAGCTCGCTCGACTAAAGG
1655	CCGGCGATAGCATATCCAAA
1656	GGTCATGAATCTTTACCGAA
1657	ACATAACACCTACTGTAGGG
1658	CCTCGTCAAGCATCTTTAGG
1659	ACTTACCGTTACCATACGGG
1660	ACTTACCATAATAAAAGCAG
1661	ACTTTGCAAGAAGAATAGAG
1662	CAAGGCCCATGAGATACGGA
1663	CTGTAACCCCCAGCAACACG
1664	CGGTATTATCCTCAAAAACA
1665	ATATAACCACCTTTTCCAGG
1666	CTAGGAATTCACTCAATCAA
1667	CTAAGACGTAATTAACTACA
1668	CCATCTACAGCGTTGCCGGG
1669	ACTGATACTTAACTATCCGA
1670	CATAGATTCCTTTATTGCCA
1671	CAAGCTGGCCAAATATCACG
1672	CATTCCCGACGGACACGGAG
1673	AATCAAGCAGCTCTTCGGGG
1674	ATATATAGCATCACGTCCGG
1675	TAAGGGGCCGCGGATAACAG
1676	AGGACGTCTTCCGCAATACA
1677	CAACTGATATAAGTATGCCA
1678	ATGCTGTCATCGCAGCCCAA
1679	ACTACGGAAGCCTTGAGCGA
1680	CAGCGACTTGATAATTCAGG
1681	CTGCCCCCCCCCATACGGGG
1682	CTTTGTTCTGCGCAGTGGCA
1683	CGGAGGGCCTAAGTTTAAAA
1684	CAATACGATGCTCCGACGAG
1685	TTAATACCTCTTAAGTCAGG
1686	CGGCTGAACAAAACAAAAAA
1687	AATCAAGCCGGACCGAACCA
1688	GCAGATTCTTCTACAAGACA
1689	CTAGAGTCACAAAAAACAGA
1690	CCTCCCCCCACCTTTCAACG
1691	GCTGAAACATGATCGCCACG
1692	ACTTACTCCCACGTGACCAA
1693	CGAAGACTCCGACAATACAA
1694	CTTGAAAATAAACTAATGGG
1695	ACGTTAAAAATCGTAACGGA
1696	GCTGCAAACGTCCTGTTCAA
1697	GCGGCCGACACTGTACAGGG
1698	CGACTCCTACGTCCACTAAG
1699	GGAGACATAACGCAGTTAAA
1700	CGGACCATTTTTCCGTACCA
1701	GCGTGCTTCGGGACATACGG
1702	CCTCTGTACGCCTTATAACG
1703	TTGTTTAAACTAGAAATGGA
1704	CCTACGGTCATCCCATTGCA
1705	CAATGCAGAGCCCCGTTCAA
1706	CGGCCGGACGGACAACCCCA
1707	GAACTGCATGCGACGACCGG
1708	TAGGGACGTACAGAGTCAAG
1709	CTAAACCCTAGACCACAGAA
1710	CCTGCCACAAACCAATGCAA
1711	CTTTGACCTCGTCTTTCCCG
1712	ACACAATTCCGGCCATTGCA
1713	CGGTACCATTCTACTATCCA
1714	CTTACCATTTAATAGCGAGA
1715	CTACTACTCTCCCATTTCAG
1716	GGGCTATGCAGACTAACCGA
1717	CCTACGTTAGAAATAAGCCA
1718	CGATTCCGCGAAACACCCCG
1719	CTTTAAATATATTAATCACG
1720	TATACGTCTATGATTATCAA
1721	CTTGATAGAACAATGAAGGG
1722	GGAACTCTCTCCAAAAAAAG
1723	CATAGCCCTCGACCTTCACA
1724	CCTTACGGAACACCTCTCAG
1725	CATAGGCGTGAATTACTCCA
1726	CGTACTTTAACCAATTTGGA
1727	ACGGCTCATTACACATGCAA
1728	CGTTCCCAACATCAGCAACA
1729	CAAGTCACAAACTCTTTCAA
1730	CCGATAAGTTAATTGATCGA
1731	AATGCATCAGCGCAGCACAG
1732	CCGTGTGCTGAAATACTAAA
1733	TGGCATTAAACACAACCACG
1734	CCATCCGGATTCCTATAGGA
1735	AAATTTATCCTAACACAACA
1736	CGTCACCCCAAAGAACGCCA
1737	CGAGTTTGCTCGGCGAACAA
1738	CTTAAACTTTGGATTCGCAA
1739	ATACAGGTCAGAGAGCGCGG
1740	TAAGGGCAAGAAACATCAAA
1741	ACAAGAGCCCAAGTGAACGG
1742	CCGCAACGATCATAGTCGAA
1743	GTATATGTTCCCAATAGGGA
1744	CATATCCTTAAGAATTAGCA
1745	GCTGCATGCGAACATTAGGA
1746	TCGGTTGTTAGGCCAACAGG
1747	CCAACAACTATCCTATTGCG
1748	GGGATGCATAGGTAAAACCA
1749	AAGGTGCTACATGATTGACA
1750	CGATGAATTGGGTCGCCGCA
1751	CGTACATTAATAAAACCCAG
1752	ACTCTTGCCACCTATAAAAA
1753	TGGATGACTGGACCGCCAGG
1754	CGGGTGCGCTTCCATACCAA
1755	ACATCCCACTGGGCATCCAG
1756	TGGGGTTGTTTACTGCAAGG
1757	CGAGGCTCATGGCAGATCGA
1758	ACTATTTATCCTTATCCCAA
1759	CATGAGGGCCTGGCTCTGAG
1760	TGATTCTGATGTCAAACAGG
1761	CAATTTCACTATTAATCCGA
1762	ACTCAGCTACGTTCATCGGA
1763	CCACCTAGACTACCTCTGCA
1764	CTTCGAATAATACTATACAA
1765	CCAATTTACAACACGCCGGG
1766	CGGGCAGTCTGGGCGATAAA
1767	CTTGCCGGACCTTCACGGGG
1768	GGTAGTGTCCCAGTGAAAAG
1769	ATATCGATAACTATTTCAAA
1770	GCTGCGTACATACCTTTGAA
1771	GGATTATAACTGGCTTGGGA
1772	CATTTATACTTTGTGCACAG
1773	TAATATCCTGTGAATACCAA
1774	TAACGACCACCTTATACAAG
1775	TGATAACGATACGCGTGAAG
1776	CCTAGAGAATCAACTTTGAG
1777	CGAAGGACTGAGCATCCGGA
1778	ACATATCCCAACCCGTACAA
1779	TAGACCCACTTTCTTCCCAG
1780	CTTCCGCCAAACATGCTGGA
1781	ATAGTGCATCCAGTTAGCAA
1782	CAGGTACCCCCAACGAACAA
1783	CTTGTTTACGAGATGAAAAA
1784	TTTGGCCGTCGTGCGACAGA
1785	CGTGACAACACGCCTCCAGG
1786	CCGCTTTCACTAGTTCACAG
1787	CCTAACCTAAGCCATCAGGA
1788	CATCGCAAAGAACCGTGGCA
1789	CATTCAAGCCAATTTTCCCA
1790	CCGCCCTCAGTCGTGTACAA
1791	CAGCCGATATCAAATTCAAG
1792	ATTGTAACACTCCTTATGCA
1793	ATTGCCAATACGGCGAGAAA
1794	GGATCCTGAGTCCTTATCGG
1795	CGAGGAACCACCCTTACACG
1796	TTATTGTCTTTTTCTCAAGA
1797	CCGGTATGAAAGTAGTCCGA
1798	CAATCTTTTCCATCGATCAA
1799	CGACCCGGCGGCCAACTGAA
1800	AGAGGTCTCCGGGCTTAGGA
1801	ATGCCGTACAGTATGACACA
1802	CTTGCAATCAAAATTACCGG
1803	CGGATATTCTTCATTTACAG
1804	TGGTCCACAACGAAAAGGAA
1805	CCTTCTAACAGAAAGTAAGA
1806	CGGACCTAAGATTCACCCCA
1807	CTACCCCTCAATATAAGAAG
1808	CAGAGCTCTTCAGAATCAGA
1809	AAAGCACACAATCAACGGCA
1810	CAGACCTTAAAATTACAGAG
1811	CTTCACATCCCGACACGACA
1812	CGTTTAGTACATTAACGCCA
1813	TCACTAATTACTGCTCCCCA
1814	TAGGATTGCAAGGCTCCCCA
1815	ATGCACTACATAAAGTACGA
1816	CTGAACAATTACCATTTCGG
1817	GTACGGGATAACTTAACCAG
1818	CTTCGAGGCCCCAAAACGAA
1819	CTGTGCCATCGTTAGTGCAA
1820	CCAATGGCTCTGATATCCAG
1821	CAACATCGATCCTTTTCGAA
1822	AATGTAACTTCTGTGAAAAG
1823	CGTTGTTACGCCATACAAAG
1824	GTACCGGTAAGCGCATCAGA
1825	TCGGGGATATCGTTTCTGGA
1826	TTACCAGATTACGATTTAGG
1827	CTTACATAACATTCAACCAG
1828	GCGAGCTTCGACTCTTTGAA
1829	CCGTAAGCCTCGCATTAACA
1830	TTGCCCCTCGCCGTGTGACA
1831	CAACTCTCTTCCGTACACCA
1832	TTTCATACTTATTTAACGCA
1833	TTGAAGAAAACCACGCTGAG
1834	GATGTACTACGTATGCACGG
1835	CTGCCCCCCGGACTTAAAGG
1836	ACGAATTGCGGCATGCCAAA
1837	TGTCTTTTCTCTCAATCCCG
1838	GTAGTGAAACCGTCTCAGGA
1839	TAAAGCCCATAACTTCCCCA
1840	GGAGGTTGAGCCTCGAGAAA
1841	CTGTCTACTCCACTTCAGAA
1842	CCGTCGAAATTTACTCAACG
1843	CTTATGTCCCTACAATCGGA
1844	GCAACTCTACCAGCTCCAAG
1845	CTGATGTATTTAAAGCCCAG
1846	CAACGGAATGAAATAATACG
1847	CTGCTGACTTGCCTGAACAG
1848	CGACCTGACGATACAATAGG
1849	CCGTTACTCTTGGTGCACAA
1850	CTGTGCCATCAGGTGTCACA
1851	GGTACCGAACCATATTCACG
1852	ATACTGTGAGAGACACAGCA
1853	GTAACTCCCCCAGATTAAAG
1854	ACGGAACCTGTTCAGTGGAG
1855	CTTGTCATCCTCTCGTTCAA
1856	CCAGATCACGAAATTTACGG
1857	CCTCTCAACCCTCCGTAACA
1858	CGGTAGCCCCCATCTTAGCA
1859	TCACTAGATGGAACGCACCG
1860	CCAACATTAGACCTGACAAG
1861	CCTGCCCCACACGAATGCAA
1862	CCGAGGGTAAGAACGCAAAG
1863	CGGACTGATACTGCGCCCGG
1864	TTGGTATTCACTAAATCCAG
1865	ACACATAACCGATTGTACAA
1866	TCTGCGATTTCCGAAAGAGA
1867	CAACGTGCAAACGAGACGAG
1868	CATCTTGCATACCTGAAACA
1869	CGTAGAAGAATACAGCACAG
1870	GAACTGCCCACCAATTGCGA
1871	TAGCGAGGCCCTTTGCTGAA
1872	TCGATTTAACCAACTCCAAG
1873	CAGCACCCTACTGATAGGGA
1874	GTGCCAGATCTGACTATACG
1875	CTAGGCCCCTGCATGAAAAA
1876	TCTCGGAATAGTTAACCAGA
1877	CTTGTATTTACAACTCCCCG
1878	CTGCCCCTAATCGTGCAGGG
1879	TGAATCAATGTTCCGCTAAA
1880	ACTACGGAAGCCTTGAGCAA
1881	TCTACCTCTAATGTTATCGG
1882	CTATAGAATCCGAATTAGCG
1883	CAGCTAGACTAATCAACCAG
1884	CATAGAGACTACAATTAAAA
1885	CATGATAATGCTTATACCCA
1886	GCGCTTCACACTCCGACGAG
1887	CTTTAGCATCCGATACCCAA
1888	CAAACATGCCATCTAAGGCA
1889	GTAGACAACCGCGCTTAGGA
1890	CTAGTAGTAGATACATGAGA
1891	GAACAATGAAGATAACCCGA
1892	CTATTTCATGACTCGCTCCA
1893	CATATTCCTCCTGCAATCCA
1894	CTGCGACAAGAGCAACTAAG
1895	CTGCGGATTTGACAATTGAG
1896	CTTATCAGCTATATAATCCA
1897	AATAAGTCTTACTATCCCCG
1898	CTAGTAAGACTAGATCCAAA
1899	AGGCATTTAGCAATTTAACA
1900	TCTAGCTACGCTACATTCCA
1901	AAGCAAGGTTTCTCTCCAAA
1902	CAGCCGGGACCTCCTCAGCG
1903	CAGCTCTATTACCTTTTGGA
1904	CTGACCCCTTCGAATCAAAA
1905	CATATATTCCAATCGTACGA
1906	AAATGTACTGAATCTCGGAA
1907	CAACAGATAACGCCGAAAAA
1908	GCTGCGCCCCGAGAAACAAA
1909	AATCACACACCACAATTAAA
1910	GGTCTAGAAAACCATCCCCA
1911	CGGGCTCCAAAACAGACCGA
1912	CTAAATGGTGGCATATTGCA
1913	AGACTACCCTAAAATTCACA
1914	GTACTTGGTGGGCTTTCGAG
1915	GGTCATGTTTTCAATACGAA
1916	ACATATATATTAGTAACCGG
1917	GGGACTTTTCTCGCTTGGGA
1918	CAAATGCTACGGCCTCTAAG
1919	CCATCAAAACCTTCGCTCGA
1920	CATCTCTGATGACCGTTCAG
1921	ACTCCCATTACTAAATGGGG
1922	GTAGTACCTAAATCTTGACA
1923	CTACGTTACGCACCGAACAA
1924	GCTTGTCCAAGTACATAAAG
1925	GATAGGTCTATCAAGTCGAG
1926	GGGCAGACCCACCATCTGGG
1927	CTGCTACTTCACAAATCCGG
1928	TTAGCGGATTCTCTATCGGG
1929	AGGCGCCAAAGACCGTCAGG
1930	TGTCAAAACTCCGAGAACAA
1931	CCAGAATCTCGAAAGCAGAA
1932	TAAAGCACCTACGATCTACA
1933	TAACCGGGCTTTCAGTCCGG
1934	CGAACCTCTGCCATGTGGCG
1935	CAGAAACCCGGAGATCACAA
1936	ACGCATCATCTGCCATGCGA
1937	AAAAATAGTAAGCAGACGGG
1938	GAGAGTGTCTGATTGCGCCG
1939	TATCTGGTAACATATCACAA
1940	CGGCGGAGCGGTCCACAGCG
1941	AGGAACGGAAATCCTCTGAA
1942	CGGGAAACAACCCTTTAACA
1943	TTTACAGTATATTCATCGAG
1944	CCGCAAGCAGCTGTAATCCG
1945	CAAATACCTTACGATATAAG
1946	ACGCAAATCTTGTAATGAAG
1947	CAGGAGGGATACGCACTGAA
1948	CATCGACCCGCCGCAAAGAA
1949	TCAGTTCACGACCCGCTACA
1950	CAAATATGCTCAACTTTACA
1951	CCACAAGAAAATAATCAACG
1952	CTAGTGACTGAAACGCCCGG
1953	ACACGGAACACGAATCGAGG
1954	CATTGGCAAATTAAACTGCA
1955	CTATATCGTGAACCTACAGA
1956	AGACGCGTTTCTCTGAGAAG
1957	CCGACGAGACGACATTCCGA
1958	GCACACAACTCTCTGTACCA
1959	ACTGATAGATTAAAGTGCAG
1960	CTGTATGCCACGCATTACGA
1961	ATGAGGAACCGGATTCGAGG
1962	CATCCGTCATCAACTACCAG
1963	GATCCGCATACTGAAACGGA
1964	CCGTTGATACCCACGATCAG
1965	ATAATGGATACCTAAATGCG
1966	ATAGTTATACGAACATTAGG
1967	CAGCTCGTTGGACAGCGAAA
1968	TCTGATTCCGAAGCGCAGAA
1969	CCTCCCTCAATCCCACCCAG
1970	CAAAAAGTAAGTCAACCACA
1971	GAGAGCTTTGTAACAATCAA
1972	CCAAAACACATTTTATCCCG
1973	CTGTGGATCCAATTTCTACG
1974	TTGTTTTATAGAAATATCAA
1975	CTAACCCACAAGGCACTAGA
1976	GCTGACCTAAGAGCACAAGA
1977	ATGGTTCCCTCTACACTCCA
1978	CTGATTGATTAACTTCAAAA
1979	ATTGTTTACTTTACTCTGGA
1980	CTGCACGAAGGTCAACACCG
1981	CGAGATGACACTGAGTGGCA
1982	CGTGGCTAATCGCCTACAAG
1983	GATCGACATGCCCCGCTAGG
1984	CCGCGCAGATCGTAACCCCA
1985	CGGTAAAGCCCCGTAACCCG
1986	AGTACGTGATGAAAATACAA
1987	ACTATATACGGGATGATCCA
1988	CGGAAACAAGGGGAATTAAA
1989	GATCCGAGCCGTACTTTGAG
1990	CGTAGTTCTAAGGAAACAGG
1991	CATACCCTAATACATCGCCG
1992	CTAGGCCAAGTCACTAAAAA
1993	CCTGCTACCCCCACATCACG
1994	CGACTTTGCAACGCATCAAA
1995	AGGAAACTTTATAAACGCGG
1996	CTTCGTGCTTTTGAGCCCAG
1997	CGATACCTCCCCAATAGCCA
1998	TGGAGCCGCTTTATTCAACG
1999	ACATCTTGTCCGATATTCCG
[truncated: 2,233 more rows]
