# Supplementary material for: Circular synthesized CRISPR/Cas gRNAs for functional interrogations in the coding and noncoding genome
Source: eLife journal article supplement (doi:10.7554/elife.42549), 2019-03-06
Supplement: supp [file elife-42549-supp-v1.zip › elife_poa_e42549_Supplementary_File_11.xlsx]

## Sheet: Sheet1
ID	Guide	Name	Ctrl	CTRL %	Doxorubicin	DOXO %	DOXO % / CTRL %
1680	TATACCTTTCCTACGTCCAA	optiValidation2_guide_3802	82	0.00350026	116	0.216669	61.9007	1
2173	CGTCCTTGTTACATACCGAA	optiValidation2_guide_3474	41	0.00175013	24	0.044828	25.6141	2
1235	CGTCCTCGATAACAGAGGCG	optiValidation2_guide_2891	145	0.00618948	50	0.0933916	15.0888	3
632	TTTACCTTTCCATATACGCA	optiValidation2_guide_260	77	0.00328683	24	0.044828	13.6387	4
1068	AGTGTCGCACCACTTCCCAG	optiValidation2_guide_3442	297	0.0126778	91	0.169973	13.4071	5
273	TATTCAATTATACTTCCGCA	optiValidation2_guide_3288	98	0.00418324	28	0.0522993	12.5021	6
3126	CTTTTCTACTATCTTAGAAG	optiValidation2_guide_2710	156	0.00665903	36	0.067242	10.0979	7
4195	CGTTATCTATCCACACTCCG	optiValidation2_guide_1417	334	0.0142572	70	0.130748	9.17071	8
3523	CATCCTCGTATCCTGTAAGA	optiValidation2_guide_2245	573	0.0244591	116	0.216669	8.85839	9
2576	CCTGCTTCTGGTCATATGGG	optiValidation2_guide_2209	539	0.0230078	104	0.194255	8.44298	10
2628	CAGAAGAGCCGTTTGCCCAA	optiValidation2_guide_3002	841	0.035899	161	0.300721	8.37686	11
630	CTTTTCCAATAGCAGAAGAA	optiValidation2_guide_3420	210	0.00896408	40	0.0747133	8.33474	12
4038	CGTGCAGGCCCCTAATTGCA	optiValidation2_guide_836	872	0.0372223	165	0.308192	8.27978	13
1177	TGAAACCGTCCTGCATTAAG	optiValidation2_guide_2576	374	0.0159646	70	0.130748	8.18989	14
392	GGTTCCGAACAGAAAATGGG	optiValidation2_guide_1048	489	0.0208735	91	0.169973	8.14299	15
1991	GTAACTCCCCCAGATTAAAG	optiValidation2_guide_1852	173	0.0073847	32	0.0597706	8.09385	16
2	TTGGTAATACCCCTTTGGGG	optiValidation2_guide_662	163	0.00695783	30	0.056035	8.05351	17
1616	CTACATGTACGTCATATGAA	optiValidation2_guide_2167	453	0.0193368	83	0.15503	8.01736	18
845	GGACTCTTCCTCTTTTTCGA	optiValidation2_guide_1218	139	0.00593337	25	0.0466958	7.87003	19
3621	CGATACTTCATATTGAAAAG	optiValidation2_guide_1238	406	0.0173306	73	0.136352	7.86771	20
2413	TAACTCGGATTATTGAGAAG	optiValidation2_guide_2052	583	0.024886	104	0.194255	7.80578	21
2716	CGTCCAAATATGAAGAGGCA	optiValidation2_guide_778	197	0.00840916	35	0.0653741	7.77416	22
796	AGTACTAAAGATATTTCAAG	optiValidation2_guide_275	231	0.00986049	41	0.0765811	7.76646	23
374	CTAATACTTAGGAAGCCAAG	optiValidation2_guide_2349	299	0.0127631	53	0.0989951	7.75633	24
1288	TAGGGCCCTGCGTAAATCGA	optiValidation2_guide_3373	374	0.0159646	66	0.123277	7.72189	25
1622	GGGTTTTACCACTTGACAAA	optiValidation2_guide_2237	212	0.00904945	37	0.0691098	7.6369	26
3632	TAGTTCGCCCTTCCGTCGAA	optiValidation2_guide_1190	89	0.00379906	15	0.0280175	7.37484	27
1256	CCTTACGACTACCTTTTACG	optiValidation2_guide_3350	359	0.0153243	60	0.11207	7.31321	28
2239	CCTGCCAACCCTATACGCCG	optiValidation2_guide_266	517	0.0220687	86	0.160634	7.27879	29
1308	CCTAATCACTCCTTTTCAAG	optiValidation2_guide_2511	410	0.0175013	67	0.125145	7.1506	30
2408	ACTTACCGTTACCATACGGG	optiValidation2_guide_1658	330	0.0140864	53	0.0989951	7.0277	31
2751	CTGAGCAAACTACAGTCCAG	optiValidation2_guide_2611	461	0.0196783	74	0.13822	7.02396	32
1542	CCTTGTGAAGAACCAATACG	optiValidation2_guide_2231	521	0.0222395	83	0.15503	6.97095	33
2311	CTGCTCCTCGCCTTTACCCA	optiValidation2_guide_523	323	0.0137876	51	0.0952594	6.90906	34
2374	CAAACCTGCTCAGCGTGCCA	optiValidation2_guide_3459	586	0.0250141	92	0.171841	6.86976	35
1654	CCTCAGGACGTTCTTCACCA	optiValidation2_guide_3875	725	0.0309474	92	0.171841	5.55266	36
689	TATACCTTTCCCACGTCCAA	optiValidation2_guide_1371	155	0.00661635	24	0.044828	6.77534	37
873	CGGGATTCTCCCGAACGGGA	optiValidation2_guide_1511	312	0.0133181	48	0.0896559	6.73191	38
921	CCGCGCTGAATAGTGCCAAG	optiValidation2_guide_3194	1030	0.0439667	158	0.295117	6.7123	39
2600	GTAGCTTATGCTCCTATCCG	optiValidation2_guide_4010	137	0.005848	21	0.0392245	6.70734	40
1972	CTAATGATTACCCCGAGGAA	optiValidation2_guide_2943	549	0.0234347	84	0.156898	6.69512	41
819	ACGCCGCTTCTTCCAAGACG	optiValidation2_guide_2875	525	0.0224102	80	0.149427	6.66779	42
3285	CCTCTATAACATAATATAAG	optiValidation2_guide_2094	420	0.0179282	64	0.119541	6.66779	43
164	AGTGAAAACCTACCACCCCA	optiValidation2_guide_2848	624	0.0266361	95	0.177444	6.66178	44
637	GTTCATCACACCACATGCAG	optiValidation2_guide_3043	172	0.00734201	26	0.0485636	6.61449	45
1376	GCGAGTCACTGGTAAACGGG	optiValidation2_guide_101	539	0.0230078	81	0.151294	6.57579	46
3384	CTACTCAGCTTTGCGTCCAA	optiValidation2_guide_2369	67	0.00285997	10	0.0186783	6.53095	47
2977	GCGGACCTTTGATCTTCAAG	optiValidation2_guide_2536	437	0.0186538	64	0.119541	6.4084	48
258	CGGTCGGGCCCCTAGATAGA	optiValidation2_guide_1103	665	0.0283863	97	0.18118	6.38266	49
2855	CGGTCTACTGTCTCTTACGG	optiValidation2_guide_1242	444	0.0189526	64	0.119541	6.30737	50
2578	ACTAGTAGCAACCTTTGCGG	optiValidation2_guide_2425	438	0.0186965	63	0.117673	6.29387	51
4123	AGTACTAAAGATATTTAAAG	optiValidation2_guide_2497	237	0.0101166	34	0.0635063	6.27743	52
222	ACACAATTCCGGCCATTGCA	optiValidation2_guide_1711	524	0.0223675	75	0.140087	6.26298	53
1482	ACATAAAACAAACCAAACAG	optiValidation2_guide_466	394	0.0168183	56	0.104599	6.21932	54
2653	CAATACTAAGTCTTTCCGCG	optiValidation2_guide_2610	388	0.0165622	55	0.102731	6.20272	55
3344	CCTTGGTTAGGTATTCCCAG	optiValidation2_guide_3706	326	0.0139157	46	0.0859203	6.17436	56
2859	CGTTCGTGTTACATACCGAA	optiValidation2_guide_4045	342	0.0145986	48	0.0896559	6.14139	57
1128	CGACCGGCTTACGTACTGAA	optiValidation2_guide_1492	143	0.00610411	20	0.0373566	6.11991	58
2713	CGTCCGTGTTACATACCAAA	optiValidation2_guide_2156	231	0.00986049	32	0.0597706	6.06163	59
360	CGGCATTCTCTGGAGTTACG	optiValidation2_guide_76	572	0.0244164	79	0.147559	6.04342	60
3995	CAAGGTCCCAGATTTATCCA	optiValidation2_guide_1056	480	0.0204893	66	0.123277	6.01664	61
1292	TCGCCTCACTACCATTAGCA	optiValidation2_guide_2578	342	0.0145986	47	0.0877881	6.01344	62
1166	CTGGCCCCCAAATCAATACA	optiValidation2_guide_2662	546	0.0233066	75	0.140087	6.01063	63
3083	CCGCAAGCAGCTGTAATCCG	optiValidation2_guide_1943	929	0.0396554	127	0.237215	5.9819	64
257	TTGCTAAGCGCGTAGAACCA	optiValidation2_guide_983	344	0.014684	47	0.0877881	5.97848	65
1335	GCTACCGGATAAGAGTCCAG	optiValidation2_guide_1446	800	0.0341489	109	0.203594	5.96194	66
3222	CCTCAGGTCGTTCTTTACCA	optiValidation2_guide_2148	675	0.0288131	91	0.169973	5.89914	67
4229	CTACTAATTGATCTGAACAG	optiValidation2_guide_946	495	0.0211296	66	0.123277	5.83432	68
872	GAGAGTGTCTGATTGCGCCG	optiValidation2_guide_1937	340	0.0145133	45	0.0840524	5.79142	69
2881	CTTAGCCAAGTTGCATTACG	optiValidation2_guide_3179	386	0.0164768	51	0.0952594	5.78142	70
3490	CAAGGTATTGAAGCTAAAAG	optiValidation2_guide_4127	584	0.0249287	77	0.143823	5.76938	71
3821	CTAGACTTAACCTAGCCGAA	optiValidation2_guide_2315	609	0.0259958	80	0.149427	5.7481	72
2526	TAAAATCTTCATTCTATACG	optiValidation2_guide_1159	122	0.0052077	16	0.0298853	5.73867	73
1682	CCAGAGTGCTAATAAACACA	optiValidation2_guide_3881	543	0.0231786	71	0.132616	5.7215	74
3479	TCTACCTGTGGTATGCTGAG	optiValidation2_guide_3777	314	0.0134034	41	0.0765811	5.71354	75
2755	GCATGAGCTGCACTTTGAAG	optiValidation2_guide_1424	475	0.0202759	62	0.115806	5.71149	76
3666	GCTTACTGCACCAATCACCA	optiValidation2_guide_1512	384	0.0163915	50	0.0933916	5.69758	77
1360	CTATCTCCCTCTTCATCACA	optiValidation2_guide_3376	247	0.0105435	32	0.0597706	5.66897	78
1815	TCGGTCCTTATCGCGAGACA	optiValidation2_guide_3416	247	0.0105435	32	0.0597706	5.66897	79
2012	GGGCAAGGTGCACATCCCAA	optiValidation2_guide_544	519	0.0221541	67	0.125145	5.64883	80
207	ATAATGGATACCTAAATGCG	optiValidation2_guide_1964	257	0.0109703	33	0.0616385	5.61865	81
2476	TAAAGCCCATAACTTCCCCA	optiValidation2_guide_1838	494	0.0210869	63	0.117673	5.5804	82
1072	CTTTTTTTTCTGACAACCAG	optiValidation2_guide_1263	142	0.00606143	18	0.033621	5.54671	83
1255	CTGAACAATTACCATTTCGG	optiValidation2_guide_1815	729	0.0311182	92	0.171841	5.52219	84
2310	CTTCTTTAACCTATACGGGA	optiValidation2_guide_2827	214	0.00913483	27	0.0504315	5.52079	85
3473	CTATCTTGCTCCCCGTCCAA	optiValidation2_guide_3225	224	0.00956169	28	0.0522993	5.46967	86
1196	TCGTGTCGACTGCATTAAGG	optiValidation2_guide_994	313	0.0133607	39	0.0728455	5.4522	87
166	GTAACGATTTCCACTTTCCA	optiValidation2_guide_4135	137	0.005848	17	0.0317531	5.42975	88
1741	GCGCCATATGAAGATTCCCA	optiValidation2_guide_2390	583	0.024886	72	0.134484	5.404	89
2689	ACTTCTGGTCATCTGAAACG	optiValidation2_guide_4019	351	0.0149828	43	0.0803168	5.36059	90
340	CTTAGGCCTATGTAAAGGCG	optiValidation2_guide_251	474	0.0202332	58	0.108334	5.35428	91
1563	ACTCCTCTAGGTACAAGAAA	optiValidation2_guide_3116	312	0.0133181	38	0.0709776	5.32943	92
987	TGTCATACTTACAAACAAGA	optiValidation2_guide_3077	339	0.0144706	41	0.0765811	5.29219	93
2425	AATACGGGCATAGCAAGGGG	optiValidation2_guide_2424	514	0.0219407	62	0.115806	5.27813	94
1369	CCGCACAAACCAGATTAGAG	optiValidation2_guide_3098	1007	0.0429849	120	0.22414	5.21439	95
1046	CTTGGGCCACGTTTTTTCGA	optiValidation2_guide_2756	630	0.0268922	75	0.140087	5.20921	96
1891	GGTAGTGTCCCAGTGAAAAG	optiValidation2_guide_1767	363	0.0154951	43	0.0803168	5.18338	97
1477	CTGTCTACTCCACTTCAGAA	optiValidation2_guide_1840	347	0.0148121	41	0.0765811	5.17018	98
1952	GGACCCATAACTACTCGGGG	optiValidation2_guide_452	475	0.0202759	56	0.104599	5.15877	99
1933	AATAAATGTCTTGAGAACCA	optiValidation2_guide_273	221	0.00943363	26	0.0485636	5.14793	100
1023	CCTGCTCCTTGTCATATGGG	optiValidation2_guide_2454	459	0.0195929	54	0.100863	5.14793	101
582	AGACGGTCCGGGCCTTGAAA	optiValidation2_guide_2161	556	0.0237335	65	0.121409	5.11552	102
586	CTAACCTTAACCTAGCCGAA	optiValidation2_guide_3468	488	0.0208308	57	0.106466	5.11101	103
4223	CCTGCAATTGCTCCTTGGCA	optiValidation2_guide_3707	816	0.0348319	95	0.177444	5.0943	104
2429	CTTGGGCATCCGCCTTAAGA	optiValidation2_guide_489	250	0.0106715	29	0.0541671	5.07586	105
825	CTATGACCCCAATTACGCCG	optiValidation2_guide_549	587	0.0250567	68	0.127013	5.069	106
3453	AAAGGGATCGTGCTGCTAAA	optiValidation2_guide_3561	338	0.0144279	39	0.0728455	5.04893	107
3078	GTTTCAGGATTTCTTCGAAA	optiValidation2_guide_3195	244	0.0104154	28	0.0522993	5.02134	108
3189	CCTTTCTCACTTCCTCGACA	optiValidation2_guide_2435	70	0.00298803	8	0.0149427	5.00084	109
3576	GAGCATAAATGTTATAGCGA	optiValidation2_guide_258	595	0.0253982	68	0.127013	5.00084	110
498	TCTAGCTTTCTTGATCACAA	optiValidation2_guide_433	325	0.013873	37	0.0691098	4.98161	111
4089	TGGATGCGATAGGCTACGGA	optiValidation2_guide_4211	519	0.0221541	59	0.110202	4.97435	112
291	CGATGACAAAACGATCTCCG	optiValidation2_guide_50	648	0.0276606	73	0.136352	4.92946	113
1511	CTAGTTCGTTGTGTGCGAAA	optiValidation2_guide_239	364	0.0155377	41	0.0765811	4.92872	114
3960	CCTGACGTCATTATTCACCA	optiValidation2_guide_3624	472	0.0201478	53	0.0989951	4.91344	115
63	TAGCACTGACAACCGAGCAA	optiValidation2_guide_1126	588	0.0250994	66	0.123277	4.91154	116
2934	AGATTTCCTGAGCCTCGAGA	optiValidation2_guide_1213	179	0.00764081	20	0.0373566	4.88909	117
1381	CCTTCCCCACTTCCTCGACA	optiValidation2_guide_3834	179	0.00764081	20	0.0373566	4.88909	118
3636	CTTCCTTATGCTCTATGCGG	optiValidation2_guide_794	351	0.0149828	39	0.0728455	4.86193	119
3715	CTTCTATGCTACACGCTCAA	optiValidation2_guide_1396	270	0.0115252	30	0.056035	4.86193	120
1453	CTACTCCAAATTATTTAACA	optiValidation2_guide_1091	551	0.02352	61	0.113938	4.84428	121
1500	CCATTTTTTCCCCCGATAGA	optiValidation2_guide_397	525	0.0224102	58	0.108334	4.83415	122
15	AGACGCGTTTCTCTGAGAAG	optiValidation2_guide_1955	655	0.0279594	72	0.134484	4.80997	123
2112	ACGTCCACTTCTCAGTTAAG	optiValidation2_guide_3142	155	0.00661635	17	0.0317531	4.7992	124
1259	TCTTCTCCCATGACTCACAG	optiValidation2_guide_1389	228	0.00973243	25	0.0466958	4.79796	125
1053	TGGCCCTTTGTGTATTCAAA	optiValidation2_guide_2757	338	0.0144279	37	0.0691098	4.79001	126
4234	GTTGCCTAATGTAAAACCCG	optiValidation2_guide_299	293	0.012507	32	0.0597706	4.77896	127
3116	CAGCGCTACCAATTGACCAG	optiValidation2_guide_1405	1065	0.0454607	116	0.216669	4.76606	128
80	TAGCCATAAAGCTAATAAGG	optiValidation2_guide_1305	453	0.0193368	49	0.0915238	4.73314	129
401	CAATCTTTTCCATCGATCAA	optiValidation2_guide_1797	334	0.0142572	36	0.067242	4.71637	130
3418	CTGCCTGTTGCCAAGAGCAG	optiValidation2_guide_4000	492	0.0210016	53	0.0989951	4.7137	131
3590	CCATCAATATATATGTCACA	optiValidation2_guide_1448	418	0.0178428	45	0.0840524	4.71072	132
3158	GCTGCGTACATACCTTTGAA	optiValidation2_guide_1769	702	0.0299656	75	0.140087	4.67493	133
1370	TTAACCTGTGAGTAGCCGAG	optiValidation2_guide_3377	245	0.0104581	26	0.0485636	4.64364	134
2148	TTTTATGATAACACTTTGGG	optiValidation2_guide_2163	245	0.0104581	26	0.0485636	4.64364	135
870	CAATTTATTTCACCAATACG	optiValidation2_guide_3758	322	0.0137449	34	0.0635063	4.62035	136
1024	CCTCGGTCACATATGACGCG	optiValidation2_guide_1115	475	0.0202759	50	0.0933916	4.60604	137
214	CTTCACGACCATCAAACCAG	optiValidation2_guide_3674	362	0.0154524	38	0.0709776	4.59332	138
509	CCGCGCTTAATAGTGCCAAA	optiValidation2_guide_3036	1063	0.0453753	111	0.207329	4.56921	139
3330	GCTACATAACGGGTATGGAG	optiValidation2_guide_1358	498	0.0212577	52	0.0971273	4.56904	140
1758	TAGACCGTACACATGTCACA	optiValidation2_guide_2058	528	0.0225383	55	0.102731	4.55806	141
2385	GCGTGGTAAGTCCAGTAGAG	optiValidation2_guide_4183	491	0.0209589	51	0.0952594	4.54506	142
3266	TTGTAGCTACCGAATACCCA	optiValidation2_guide_1049	443	0.0189099	46	0.0859203	4.54366	143
2606	CTAGACATTACGTCGACCAG	optiValidation2_guide_2697	464	0.0198064	48	0.0896559	4.52663	144
2151	CGATTCCGCGAAACACCCCG	optiValidation2_guide_1717	561	0.0239469	58	0.108334	4.52394	145
901	CAAAGAAATCACGTGAGAAA	optiValidation2_guide_2751	833	0.0355575	86	0.160634	4.51757	146
1007	CCTGTGTACATTCCATTGGA	optiValidation2_guide_868	746	0.0318438	77	0.143823	4.51651	147
738	TCTATTCCTTACCAGTAAAG	optiValidation2_guide_3747	165	0.00704321	17	0.0317531	4.50834	148
427	CCGACCCTTTTTTCAAGGGA	optiValidation2_guide_3477	670	0.0285997	69	0.12888	4.50636	149
3618	CGTCGCGGTCTCGTTACCCG	optiValidation2_guide_854	526	0.0224529	54	0.100863	4.4922	150
2180	ATAAACCGCTTGGAAACGAG	optiValidation2_guide_2467	673	0.0287277	69	0.12888	4.48627	151
1003	CTGCCTGCTGGCTCAAAGCA	optiValidation2_guide_1038	528	0.0225383	54	0.100863	4.47519	152
3587	ATGGTCCTTATTCATACAAG	optiValidation2_guide_350	147	0.00627486	15	0.0280175	4.46504	153
804	TTTAAGAACATATTAATCGG	optiValidation2_guide_2341	245	0.0104581	25	0.0466958	4.46504	154
251	CCTGACCTCCTTACATCCGG	optiValidation2_guide_2297	510	0.0217699	52	0.0971273	4.46154	155
88	CAGGCACCAAAAACAAAACA	optiValidation2_guide_2632	628	0.0268069	64	0.119541	4.45935	156
2104	CCAATTGGAAGATAAATCCA	optiValidation2_guide_2522	543	0.0231786	55	0.102731	4.43215	157
2925	GCTAACCCTCCTAAGCTAAG	optiValidation2_guide_2002	346	0.0147694	35	0.0653741	4.42633	158
430	TTAACCCCTGTAACACCCCG	optiValidation2_guide_178	287	0.0122509	29	0.0541671	4.42148	159
2038	CCGTTGATACCCACGATCAG	optiValidation2_guide_1963	624	0.0266361	63	0.117673	4.41781	160
732	AAGGTGATTTAGATACTAGG	optiValidation2_guide_3055	466	0.0198917	47	0.0877881	4.4133	161
588	CTGTGGCCTCCGACTAGAAG	optiValidation2_guide_2619	605	0.0258251	61	0.113938	4.4119	162
3302	TAGGTGATTTAGATACTCGG	optiValidation2_guide_4092	486	0.0207454	49	0.0915238	4.41175	163
1018	GCGCATGACCGTCATTCGAG	optiValidation2_guide_3349	698	0.0297949	70	0.130748	4.38828	164
3215	CGACCCTTACCCTTTAACAA	optiValidation2_guide_908	510	0.0217699	51	0.0952594	4.37574	165
1788	GGGTTCTACCACTTGACAAA	optiValidation2_guide_8	150	0.00640291	15	0.0280175	4.37574	166
699	TGGGGCCCTCTATTGCTGAG	optiValidation2_guide_3322	486	0.0207454	48	0.0896559	4.32172	167
3809	GTTCCAAGCATGCTGCAAAG	optiValidation2_guide_3601	294	0.0125497	29	0.0541671	4.3162	168
2688	ACTAGTAGCGCCCTTTGCGG	optiValidation2_guide_2799	388	0.0165622	38	0.0709776	4.28552	169
2978	CTTCCCGTTCGATATTACAG	optiValidation2_guide_3184	327	0.0139584	32	0.0597706	4.28207	170
2372	CATTTTTTCGCTGAGCCACA	optiValidation2_guide_4081	584	0.0249287	57	0.106466	4.27084	171
2378	AAACTGGGATCCTAGACCAA	optiValidation2_guide_324	431	0.0183977	42	0.078449	4.26406	172
267	GCGGTTTGCAAATTGTAAGG	optiValidation2_guide_2736	308	0.0131473	30	0.056035	4.26208	173
234	TGGGAACCCTTAAATTTCGA	optiValidation2_guide_3283	524	0.0223675	51	0.0952594	4.25883	174
3339	CTAGGAACCGACGCGCCCCA	optiValidation2_guide_1644	773	0.0329964	75	0.140087	4.24554	175
1345	CAGGGTCCTAGAGTAAGCAA	optiValidation2_guide_2817	785	0.0335086	76	0.141955	4.23638	176
1936	CTAGCCACAGTCTAGAGACA	optiValidation2_guide_1595	651	0.0277887	63	0.117673	4.23459	177
668	TGATAACGATGCGCGTGAAG	optiValidation2_guide_3739	527	0.0224956	51	0.0952594	4.23459	178
1473	AATTGTCCTGCTCTATTAGA	optiValidation2_guide_3107	155	0.00661635	15	0.0280175	4.23459	179
2496	CAAACTACATCCTAACCGAG	optiValidation2_guide_2605	765	0.0326549	74	0.13822	4.23274	180
298	TAAAGGCTATGACCACCCAG	optiValidation2_guide_3682	479	0.0204466	46	0.0859203	4.20217	181
438	CAGTATAACCTAGTGAACGG	optiValidation2_guide_627	460	0.0196356	44	0.0821846	4.18549	182
1572	CTTCTCATTTACAAGTACGG	optiValidation2_guide_1118	304	0.0129766	29	0.0541671	4.17422	183
3991	GAGGCCCAACCCTCACGCGG	optiValidation2_guide_3413	231	0.00986049	22	0.0410923	4.16737	184
1775	ACGGGCCATGACCTAACGGG	optiValidation2_guide_1652	834	0.0356002	79	0.147559	4.14488	185
4225	ACTAGTAGCGTCCTTTGCGG	optiValidation2_guide_3646	412	0.0175867	39	0.0728455	4.14208	186
1420	CGATGTATTCACACTAAGGG	optiValidation2_guide_766	550	0.0234774	52	0.0971273	4.13706	187
1210	CGTCTCGTCGACGTGCAACG	optiValidation2_guide_1646	340	0.0145133	32	0.0597706	4.11834	188
4047	CATGGGCCACGTTTGTTCGA	optiValidation2_guide_4204	606	0.0258678	57	0.106466	4.11579	189
3187	CTTTCCTTATTTAAATGCGG	optiValidation2_guide_2210	149	0.00636023	14	0.0261497	4.11143	190
3727	GCATTAGTACCAGTTCACGA	optiValidation2_guide_787	458	0.0195502	43	0.0803168	4.10823	191
2757	CGGACACGAAGGCTTTACCA	optiValidation2_guide_1399	459	0.0195929	43	0.0803168	4.09928	192
1665	GGGAGCCTCCTTGCGCTACA	optiValidation2_guide_1374	449	0.0191661	42	0.078449	4.09312	193
709	CCACCTATTAAAAAGTAACG	optiValidation2_guide_1628	974	0.0415763	91	0.169973	4.08822	194
3693	CCTTACACCTGTACGATAGA	optiValidation2_guide_1649	418	0.0178428	39	0.0728455	4.08263	195
404	CTATAGGGACTGGAGTACAG	optiValidation2_guide_804	805	0.0343623	75	0.140087	4.07678	196
2681	CCGAAGGCAGTGCAGCTCAG	optiValidation2_guide_32	624	0.0266361	58	0.108334	4.06719	197
2871	CGACAAACTTATCTGTGCAG	optiValidation2_guide_2145	625	0.0266788	58	0.108334	4.06069	198
3893	GCACATAACCGTCATTCGAG	optiValidation2_guide_2409	475	0.0202759	44	0.0821846	4.05332	199
22	GTACTACCTGATGTGCAGGA	optiValidation2_guide_2048	270	0.0115252	25	0.0466958	4.05161	200
2942	CGGGTCAATATTCCAACGGG	optiValidation2_guide_2614	702	0.0299656	65	0.121409	4.05161	201
647	CTGTTGCGCGAGGAGTACAA	optiValidation2_guide_2744	585	0.0249714	54	0.100863	4.03914	202
644	TGATTTACTTACTTTTGGGG	optiValidation2_guide_3735	185	0.00789693	17	0.0317531	4.02095	203
829	CCTACAAATGCTCCTTGGCA	optiValidation2_guide_3065	621	0.0265081	57	0.106466	4.01638	204
1186	AGTTCCATAATGGCGTTCCG	optiValidation2_guide_287	230	0.0098178	21	0.0392245	3.99524	205
4117	ACTGCGAATCTTCAGCCAGG	optiValidation2_guide_588	493	0.0210442	45	0.0840524	3.99408	206
3234	CATTGAACCTTACTGTTCAA	optiValidation2_guide_4085	515	0.0219833	47	0.0877881	3.99339	207
3362	AATAAATCTGTCACAACAGA	optiValidation2_guide_842	395	0.016861	36	0.067242	3.98802	208
1017	CTGAGAAAACTCCAGTCCAG	optiValidation2_guide_2572	506	0.0215992	46	0.0859203	3.97794	209
2257	CCTTAGGCAGGGCTTCTGAA	optiValidation2_guide_3451	550	0.0234774	50	0.0933916	3.97794	210
3937	AGGGGCCCTCTATTGCCGAG	optiValidation2_guide_3144	386	0.0164768	35	0.0653741	3.96764	211
1458	CCTACGGTCATCCCATTGCA	optiValidation2_guide_1703	596	0.0254409	54	0.100863	3.9646	212
3148	TATTCAAATATGCTTCCGCA	optiValidation2_guide_3334	276	0.0117814	25	0.0466958	3.96353	213
2128	GAAACGCACAACACTCAGCA	optiValidation2_guide_2131	674	0.0287704	61	0.113938	3.96024	214
1992	TTATAGAGTTTCCTTTGCCA	optiValidation2_guide_2711	221	0.00943363	20	0.0373566	3.95994	215
3034	CCTTGGTCAGGTATTCCCAG	optiValidation2_guide_1384	387	0.0165195	35	0.0653741	3.95739	216
2081	ACTATTCCTTACAAGTAAAG	optiValidation2_guide_2521	299	0.0127631	27	0.0504315	3.95134	217
2830	CCTTGCCTAGTATTGCGACA	optiValidation2_guide_1463	255	0.010885	23	0.0429601	3.94674	218
533	CTTGCCATCCCGCATCCAGG	optiValidation2_guide_3388	455	0.0194222	41	0.0765811	3.94297	219
3468	CGAGCGATCCACATAATCAA	optiValidation2_guide_381	1157	0.0493878	104	0.194255	3.93325	220
561	CTACGTTACGCACCGAACAA	optiValidation2_guide_1922	646	0.0275752	58	0.108334	3.92868	221
1502	CGGGTTCATATTCCAACGGG	optiValidation2_guide_2416	635	0.0271057	57	0.106466	3.92783	222
3788	AATGCATCAGCGCAGCACAG	optiValidation2_guide_1730	536	0.0228797	48	0.0896559	3.91857	223
19	TCGGTGCCCATCATGAAGCG	optiValidation2_guide_748	393	0.0167756	35	0.0653741	3.89697	224
417	GCGACTCTCCAAAAGCGCAA	optiValidation2_guide_1040	371	0.0158365	33	0.0616385	3.89217	225
3598	ATACTTCACGGCCCGACACA	optiValidation2_guide_2240	315	0.0134461	28	0.0522993	3.88955	226
3188	CTGGAATCTTCAAAAAAACG	optiValidation2_guide_1067	540	0.0230505	48	0.0896559	3.88955	227
1681	AAAGTGAAAGAACATTTCGA	optiValidation2_guide_3119	484	0.0206601	43	0.0803168	3.88754	228
3720	CTTGGTCAACGGTCGCTGCG	optiValidation2_guide_3593	439	0.0187392	39	0.0728455	3.88733	229
489	CGAGTCAATTCCGTTCAGCG	optiValidation2_guide_1176	361	0.0154097	32	0.0597706	3.87877	230
1038	CAAGCAATTCCGACGTACAG	optiValidation2_guide_427	927	0.03957	82	0.153162	3.87066	231
705	AGTATATTCTCGTCTAAGGA	optiValidation2_guide_3323	215	0.00917751	19	0.0354888	3.86693	232
3536	CCAGGGATACAAATGCCCAG	optiValidation2_guide_3131	1150	0.049089	101	0.188651	3.84304	233
2237	CATTGACCCTTACTGTTCAA	optiValidation2_guide_334	457	0.0195075	40	0.0747133	3.82997	234
3264	TGGAGCCGCTTTATTCAACG	optiValidation2_guide_1997	688	0.029368	60	0.11207	3.81605	235
1671	CAAATGATTAGCGCTTTCAA	optiValidation2_guide_772	517	0.0220687	45	0.0840524	3.80867	236
729	ACGCTGCTTCTACCAAGACG	optiValidation2_guide_3745	495	0.0211296	43	0.0803168	3.80115	237
3890	CGATGCTAAGCCCAGTGAGA	optiValidation2_guide_3611	565	0.0241176	49	0.0915238	3.79489	238
701	CAAAACTACGTCTTTCCGCG	optiValidation2_guide_3050	496	0.0211723	43	0.0803168	3.79348	239
3586	CGAGCTCACACAAAACCCGG	optiValidation2_guide_3266	646	0.0275752	56	0.104599	3.79321	240
822	ACTTCTGGACATCTGAACCG	optiValidation2_guide_3064	427	0.018227	37	0.0691098	3.79162	241
101	CGATCTAACTGGCTACACGG	optiValidation2_guide_846	681	0.0290692	59	0.110202	3.79102	242
1557	CCGACCCTTTTTCCAAGGGA	optiValidation2_guide_367	635	0.0271057	55	0.102731	3.79001	243
529	CAGTGATAAGCACCATTGCG	optiValidation2_guide_389	670	0.0285997	58	0.108334	3.78795	244
2528	GAGTGATCCTCCATTAAACG	optiValidation2_guide_3479	312	0.0133181	27	0.0504315	3.7867	245
2194	CGTGACAGCAGCATACTAAA	optiValidation2_guide_30	636	0.0271484	55	0.102731	3.78405	246
221	GTTCCGAGCATGCTGCAAAG	optiValidation2_guide_796	394	0.0168183	34	0.0635063	3.77602	247
204	AAAGTTACCTTGGAACTGCG	optiValidation2_guide_971	290	0.012379	25	0.0466958	3.77219	248
4083	CCGCTAGTATAAGAAAAGGG	optiValidation2_guide_20	2019	0.0861832	174	0.325003	3.77107	249
3570	CCACACCCACCGACAAAGCA	optiValidation2_guide_218	1033	0.0440947	89	0.166237	3.77	250
3525	GATCGACATGCCCCGCTAGG	optiValidation2_guide_1982	571	0.0243738	49	0.0915238	3.75501	251
2579	TTGGGTGATACAAAATCGGG	optiValidation2_guide_1290	583	0.024886	50	0.0933916	3.75278	252
2490	ATGACTAACAGGCCAACCAA	optiValidation2_guide_813	385	0.0164341	33	0.0616385	3.75063	253
2047	CAATTGGACCGCTATACCAA	optiValidation2_guide_2392	700	0.0298803	60	0.11207	3.75063	254
3979	TGTCACGATAATTATAGGGA	optiValidation2_guide_873	467	0.0199344	40	0.0747133	3.74796	255
2766	CGGCCTCGATAACTGAGGCG	optiValidation2_guide_3505	479	0.0204466	41	0.0765811	3.74541	256
1216	TCAGGGCTCGATTTGTCAAA	optiValidation2_guide_318	596	0.0254409	51	0.0952594	3.74434	257
2542	CAACTCCAATCCGCAATGCA	optiValidation2_guide_2285	902	0.0385029	77	0.143823	3.73539	258
2306	GCACTTGTAACGGAGTTAAA	optiValidation2_guide_2395	539	0.0230078	46	0.0859203	3.7344	259
1484	ATAATAACCGTGTATTTAAG	optiValidation2_guide_3849	270	0.0115252	23	0.0429601	3.72748	260
899	CTACAAACCGGCCATAAAGG	optiValidation2_guide_740	893	0.0381187	76	0.141955	3.72403	261
3515	TAAAGACTATGACCACCCAG	optiValidation2_guide_40	683	0.0291546	58	0.108334	3.71585	262
1607	GTAGATCTCACCAAAACACA	optiValidation2_guide_1601	436	0.0186111	37	0.0691098	3.71336	263
3351	CTGCTGACTTGCCTGAACAG	optiValidation2_guide_1846	484	0.0206601	41	0.0765811	3.70672	264
1432	CCTACAATTACTCCTTGGCA	optiValidation2_guide_3380	591	0.0252275	50	0.0933916	3.70198	265
2599	CTAAACAATTACCATTTCGG	optiValidation2_guide_4009	557	0.0237762	47	0.0877881	3.69228	266
906	AGAGCCTCCCATAAGTCACG	optiValidation2_guide_2453	332	0.0141718	28	0.0522993	3.69038	267
183	AAGCAAGGTTTCTCTCCAAA	optiValidation2_guide_1900	439	0.0187392	37	0.0691098	3.68798	268
3170	CCTGACCTCCTCGCATCCGG	optiValidation2_guide_2966	476	0.0203186	40	0.0747133	3.67709	269
1350	AGTGGCGGCCAGTTATGCAG	optiValidation2_guide_2570	515	0.0219833	43	0.0803168	3.65353	270
993	CATTTAAGAACCACGTTACA	optiValidation2_guide_2658	635	0.0271057	53	0.0989951	3.65219	271
1987	CCGACCCTTTTTACAAGGGA	optiValidation2_guide_2918	707	0.0301791	59	0.110202	3.65161	272
3115	AAGCAGCTCAAAACGCTCAG	optiValidation2_guide_4069	228	0.00973243	19	0.0354888	3.64645	273
1833	AATATCTAACCTAAGTTGCA	optiValidation2_guide_3123	312	0.0133181	26	0.0485636	3.64645	274
1218	CTGTAATGTTTATTACGACA	optiValidation2_guide_2834	662	0.0282582	55	0.102731	3.63543	275
1559	CCTGCCGTCATTATACACCA	optiValidation2_guide_4166	530	0.0226236	44	0.0821846	3.63269	276
1874	GCTGGGAACCTGGCTATAAA	optiValidation2_guide_1567	494	0.0210869	41	0.0765811	3.63169	277
3179	TGAAGGTACGTTCCATTGCG	optiValidation2_guide_476	520	0.0221968	43	0.0803168	3.6184	278
1132	TCGCAGTCTGCTCCAATAAG	optiValidation2_guide_3990	460	0.0196356	38	0.0709776	3.61474	279
604	CCTGACCTTCTCACATCCGG	optiValidation2_guide_2569	534	0.0227944	44	0.0821846	3.60548	280
1324	CTTTACTCATTACCAAGCCA	optiValidation2_guide_2895	231	0.00986049	19	0.0354888	3.59909	281
2088	CCACTAGGAACAGAAACGGA	optiValidation2_guide_2045	1427	0.0609131	117	0.218536	3.58768	282
2923	CTTATTTCTGAAATTTAAGA	optiValidation2_guide_2366	171	0.00729932	14	0.0261497	3.58248	283
224	CATCTTGATTAAGTGACCGG	optiValidation2_guide_2195	795	0.0339354	65	0.121409	3.57765	284
2704	CAGTATAACCTAGAGAACGG	optiValidation2_guide_4022	404	0.0172452	33	0.0616385	3.57424	285
963	GCTATGGGCGGTAATCTGCA	optiValidation2_guide_1344	505	0.0215565	41	0.0765811	3.55258	286
2121	CTAATCCTTGTGTCACAACA	optiValidation2_guide_305	308	0.0131473	25	0.0466958	3.55174	287
170	AAGGTGATTTAGATACTCGG	optiValidation2_guide_504	421	0.0179708	34	0.0635063	3.53385	288
3390	CCAGGCCCCCGGTATTCACG	optiValidation2_guide_3219	644	0.0274898	52	0.0971273	3.53321	289
1609	CATACTCGTTGAACGTTGAG	optiValidation2_guide_880	657	0.0280448	53	0.0989951	3.5299	290
3503	GCGCTCCTTTGGACTACAAA	optiValidation2_guide_885	372	0.0158792	30	0.056035	3.52882	291
2626	GCTGGTTCACCGTAGCTAAG	optiValidation2_guide_819	410	0.0175013	33	0.0616385	3.52194	292
2684	CCTGCTTCACATGTACAAAG	optiValidation2_guide_1597	560	0.0239042	45	0.0840524	3.51622	293
288	GCGTTGCAAGGTGATTTACG	optiValidation2_guide_3999	536	0.0228797	43	0.0803168	3.51039	294
2097	CGTTATATCGCTACTTAAAA	optiValidation2_guide_3940	399	0.0170318	32	0.0597706	3.50936	295
452	ACTTTTCCTTACCAGTAAAG	optiValidation2_guide_3111	275	0.0117387	22	0.0410923	3.50059	296
2076	CGACTCGAATCCGCGTAACG	optiValidation2_guide_2133	513	0.021898	41	0.0765811	3.49718	297
1002	CGTGCCGGCCGGCCGATAAG	optiValidation2_guide_95	526	0.0224529	42	0.078449	3.49394	298
2504	CTTCAGTTTGACGAAATGAG	optiValidation2_guide_363	689	0.0294107	55	0.102731	3.49297	299
12	CTGCCTGTTGCCAAAAGCAG	optiValidation2_guide_74	716	0.0305632	57	0.106466	3.48348	300
3561	CATTGACCCTTACTGTTAAA	optiValidation2_guide_3397	402	0.0171598	32	0.0597706	3.48318	301
4221	CCAAAGGTCACGACTTTCGG	optiValidation2_guide_764	591	0.0252275	47	0.0877881	3.47986	302
2017	CTATCACCCAGTCCGTTACG	optiValidation2_guide_1212	566	0.0241603	45	0.0840524	3.47894	303
2157	TCTGAATCTTTGGTTCACCG	optiValidation2_guide_3294	214	0.00913483	17	0.0317531	3.47605	304
2484	CAGCCTCGATAACAGAGGCG	optiValidation2_guide_3471	1110	0.0473816	88	0.164369	3.46905	305
1061	CGATGGATCACATCGCAACG	optiValidation2_guide_36	341	0.014556	27	0.0504315	3.46466	306
2949	TATTCCGCACGGCCGTACCA	optiValidation2_guide_2042	379	0.016178	30	0.056035	3.46365	307
2051	CCTACGAATCGGGCGAGACG	optiValidation2_guide_689	695	0.0296668	55	0.102731	3.46281	308
2665	TTGGAGAACATATTAATCGG	optiValidation2_guide_3411	493	0.0210442	39	0.0728455	3.46154	309
2149	CCTCGTGAAGAACCAATAAG	optiValidation2_guide_3175	687	0.0293254	54	0.100863	3.43945	310
2722	AGGGGCGGCCAGATATGCAG	optiValidation2_guide_2950	818	0.0349172	64	0.119541	3.42356	311
3802	GGGTGAACCACGGTTTGACG	optiValidation2_guide_1084	422	0.0180135	33	0.0616385	3.42179	312
3939	CAGACGTATAGAACTCGCAA	optiValidation2_guide_3618	870	0.0371369	68	0.127013	3.42012	313
1808	GAACTGATTGCGAAGAAAGG	optiValidation2_guide_3901	423	0.0180562	33	0.0616385	3.4137	314
2092	CTGTTCACAGGGGTGCAAAA	optiValidation2_guide_526	706	0.0301364	55	0.102731	3.40886	315
556	CATGGTCGTTGGTTTTCGAA	optiValidation2_guide_1270	723	0.0308621	56	0.104599	3.38923	316
1317	CTACGTGATTAGCCATTAAA	optiValidation2_guide_3821	633	0.0270203	49	0.0915238	3.38722	317
2530	CAATGGAATTGATAGCAAAG	optiValidation2_guide_1441	661	0.0282155	51	0.0952594	3.37614	318
398	CTAACTTGCTCCCCTTCCAA	optiValidation2_guide_3697	195	0.00832379	15	0.0280175	3.36595	319
1489	CATGATATAAAAGTATTGGG	optiValidation2_guide_3108	143	0.00610411	11	0.0205462	3.36595	320
1719	CATGTAATTGCGAAGCCAAA	optiValidation2_guide_828	847	0.0361551	65	0.121409	3.358	321
1523	GCGCGCTCCCTATAGCAACA	optiValidation2_guide_2649	613	0.0261666	47	0.0877881	3.35497	322
1273	GTTACAATACCACTGTCCCG	optiValidation2_guide_3666	392	0.016733	30	0.056035	3.34878	323
454	TCTCGGAATAGTTAACCAGA	optiValidation2_guide_1875	379	0.016178	29	0.0541671	3.34819	324
3422	ACGACCCTTTTTCCAAGGGA	optiValidation2_guide_2607	393	0.0167756	30	0.056035	3.34026	325
696	TTAGGGATCTACGCTTCCAA	optiValidation2_guide_1123	393	0.0167756	30	0.056035	3.34026	326
1095	CCTAAAAATAGCATAAGCGG	optiValidation2_guide_3788	721	0.0307767	55	0.102731	3.33794	327
3168	CTGCTCGATAGTGAGCCCAA	optiValidation2_guide_598	354	0.0151109	27	0.0504315	3.33743	328
3268	TATATTAATACCATATAGAG	optiValidation2_guide_2663	118	0.00503696	9	0.0168105	3.33743	329
347	ACAAACACTTGACATCCACG	optiValidation2_guide_3060	499	0.0213004	38	0.0709776	3.33223	330
2130	CTGCCTGACCGGTCTCCCCA	optiValidation2_guide_3440	565	0.0241176	43	0.0803168	3.33021	331
1692	CTACTAGATTTGCTTCTGGA	optiValidation2_guide_236	487	0.0207881	37	0.0691098	3.32448	332
2761	CAAGGGGCCTGGACTACAAG	optiValidation2_guide_3712	1093	0.0466559	83	0.15503	3.32284	333
3956	CCTGCTACCCCCACATCACG	optiValidation2_guide_1992	646	0.0275752	49	0.0915238	3.31906	334
2043	AAATTGCACCAACAGTTCGG	optiValidation2_guide_678	489	0.0208735	37	0.0691098	3.31089	335
3957	CTTTTAAATAGCTTTACCGG	optiValidation2_guide_3623	186	0.00793961	14	0.0261497	3.29357	336
3374	CAGGGCCCACGTCCGAGCCG	optiValidation2_guide_2100	598	0.0255263	45	0.0840524	3.29278	337
911	CTGTCCATAGGATTAAGGAG	optiValidation2_guide_3764	454	0.0193795	34	0.0635063	3.27698	338
606	ATGGACAGTTTACCTCTGCG	optiValidation2_guide_2499	628	0.0268069	47	0.0877881	3.27484	339
2986	GCAGAAGGTAGTAAGCCAAG	optiValidation2_guide_855	842	0.0359417	63	0.117673	3.27401	340
50	CTAGCCTTAACCTAGACGAA	optiValidation2_guide_2327	723	0.0308621	54	0.100863	3.26819	341
3375	CCAATCGGAAGATAGATCCA	optiValidation2_guide_4105	683	0.0291546	51	0.0952594	3.26739	342
3032	CTGATGTATTTTAAGCCCAG	optiValidation2_guide_3190	442	0.0188673	33	0.0616385	3.26695	343
2011	TGATTCTGATGTCAAACAGG	optiValidation2_guide_1759	295	0.0125924	22	0.0410923	3.26326	344
48	CCGCTTGTATAAGAAAAGGG	optiValidation2_guide_3006	1301	0.0555346	97	0.18118	3.26246	345
1974	CTATCTTGCTACCCTTCCAA	optiValidation2_guide_2325	215	0.00917751	16	0.0298853	3.25636	346
335	ACTGGTAGCGACCTTTGCGG	optiValidation2_guide_2856	770	0.0328683	57	0.106466	3.23918	347
2145	CTGTGCTGCACCAATAAGCA	optiValidation2_guide_3946	622	0.0265508	46	0.0859203	3.23608	348
3210	CTGACGTGTGCACTGTGGCA	optiValidation2_guide_1326	541	0.0230932	40	0.0747133	3.2353	349
271	AAGGATAAAGCAGTTAACAA	optiValidation2_guide_279	257	0.0109703	19	0.0354888	3.23498	350
3605	TAGATGTAAGACCATAACGA	optiValidation2_guide_1474	487	0.0207881	36	0.067242	3.23463	351
1201	CGGTTCACATTTAATAAGAA	optiValidation2_guide_3180	460	0.0196356	34	0.0635063	3.23424	352
2376	CGTCTGAATGATTCTTGAAA	optiValidation2_guide_2687	407	0.0173732	30	0.056035	3.22536	353
2288	CTACCCGTACATATGTACCA	optiValidation2_guide_822	503	0.0214711	37	0.0691098	3.21873	354
3495	CTATAAGAAAAGCATCAACA	optiValidation2_guide_4129	599	0.025569	44	0.0821846	3.21423	355
1343	CGATCAGATGTCACACTCAG	optiValidation2_guide_2015	724	0.0309047	53	0.0989951	3.20323	356
1195	CTGATGTATTTCAAGCCCAG	optiValidation2_guide_3457	342	0.0145986	25	0.0466958	3.19864	357
2864	CAGGGTGCCCATTCTAGGGA	optiValidation2_guide_995	812	0.0346611	59	0.110202	3.17942	358
3197	CTAGTCGATCCGCTTCGGGG	optiValidation2_guide_517	661	0.0282155	48	0.0896559	3.17754	359
1412	GATGTACTACGTATGCACGG	optiValidation2_guide_1833	414	0.017672	30	0.056035	3.17083	360
1516	CGTTTGAGCTATCTTTACCG	optiValidation2_guide_3677	442	0.0188673	32	0.0597706	3.16796	361
3601	AGTAATTGAGAGATACAAGG	optiValidation2_guide_2113	567	0.024203	41	0.0765811	3.16411	362
1777	ACTACTGAAAGTACGAGCAA	optiValidation2_guide_59	512	0.0218553	37	0.0691098	3.16215	363
1043	ATTCATAAAATCAAAAAGAG	optiValidation2_guide_1250	180	0.0076835	13	0.0242818	3.16026	364
880	GGACAAAGATGGTTTATGAG	optiValidation2_guide_3760	568	0.0242457	41	0.0765811	3.15854	365
671	CTGCTATCCCTATTAATGAA	optiValidation2_guide_1006	624	0.0266361	45	0.0840524	3.15558	366
1810	CTGATGATTACCTTGAGGAA	optiValidation2_guide_3675	430	0.018355	31	0.0579028	3.1546	367
4157	CCTATGCAACTTTATACCAA	optiValidation2_guide_3565	333	0.0142145	24	0.044828	3.15369	368
2314	GTTTACACCTGCGCTAACAG	optiValidation2_guide_616	222	0.00947631	16	0.0298853	3.15369	369
366	CTTGGTCTTACCACGTCACA	optiValidation2_guide_2857	320	0.0136596	23	0.0429601	3.14506	370
3669	CTACGCACCCCATAGCTGCA	optiValidation2_guide_912	336	0.0143425	24	0.044828	3.12553	371
4192	CTGTATCTACGCCAATAGGA	optiValidation2_guide_151	462	0.019721	33	0.0616385	3.12553	372
2768	CAAGGCCCATGAGATACGGA	optiValidation2_guide_1661	1040	0.0443935	74	0.13822	3.11351	373
3080	CTATTTCATGACTCGCTCCA	optiValidation2_guide_1891	155	0.00661635	11	0.0205462	3.10536	374
2516	GTTGCAATACCACTGTCCCG	optiValidation2_guide_805	282	0.0120375	20	0.0373566	3.10336	375
2807	CGTATAAGTACTCTACGGGA	optiValidation2_guide_1353	691	0.0294961	49	0.0915238	3.10291	376
2440	GCATAATTTACACAAACAGG	optiValidation2_guide_533	367	0.0156658	26	0.0485636	3.09998	377
3025	CGACTCTTTTTCCCGATGAG	optiValidation2_guide_3189	607	0.0259105	43	0.0803168	3.09978	378
1222	TGGGGTTGTTTACTGCAAGG	optiValidation2_guide_1755	339	0.0144706	24	0.044828	3.09787	379
2799	CTAGCCTTAGCCTAGCCGAA	optiValidation2_guide_4034	255	0.010885	18	0.033621	3.08876	380
722	CCGTTGTGCCCCCCTACCAA	optiValidation2_guide_1538	612	0.0261239	43	0.0803168	3.07446	381
3997	CCGCGCCAACACTAACACAA	optiValidation2_guide_2439	769	0.0328256	54	0.100863	3.07269	382
4158	GATCGACAATCTCAGTCAGG	optiValidation2_guide_431	470	0.0200625	33	0.0616385	3.07233	383
708	CCAATACTTTCGGTTACGGA	optiValidation2_guide_347	328	0.014001	23	0.0429601	3.06835	384
1555	GCTAGCCACTACCAAACGCA	optiValidation2_guide_2308	485	0.0207028	34	0.0635063	3.06753	385
2261	CCACATTATGCCCATAACAA	optiValidation2_guide_1260	629	0.0268496	44	0.0821846	3.06093	386
3791	CGTTACACCCCTTTATCGCG	optiValidation2_guide_3237	572	0.0244164	40	0.0747133	3.05996	387
212	ACTACACTCTATCCGCCCAG	optiValidation2_guide_2262	517	0.0220687	36	0.067242	3.04694	388
3528	CTGTTAATACGAGATCAACA	optiValidation2_guide_1402	273	0.0116533	19	0.0354888	3.04539	389
2574	CCTGCTCCTGGTGATATGGG	optiValidation2_guide_3484	705	0.0300937	49	0.0915238	3.04129	390
4126	CTAGAGCTCCCGCCAAGCAA	optiValidation2_guide_288	490	0.0209162	34	0.0635063	3.03623	391
1398	AAGAATAGCCTATAGAGAAG	optiValidation2_guide_2667	649	0.0277033	45	0.0840524	3.03403	392
3005	ACTTACTCAACTTATTGCCA	optiValidation2_guide_1083	303	0.0129339	21	0.0392245	3.03269	393
1876	CGGCCGGACGGACAACCCCA	optiValidation2_guide_1705	895	0.0382041	62	0.115806	3.03124	394
228	CAATGGCTTACCATGTTAGG	optiValidation2_guide_112	549	0.0234347	38	0.0709776	3.02874	395
1372	TAACAAGGACCGCTTCCGGG	optiValidation2_guide_3099	680	0.0290265	47	0.0877881	3.02441	396
254	CGGTGGTCTTTGGAACCCAG	optiValidation2_guide_1302	521	0.0222395	36	0.067242	3.02354	397
1752	CTTGGTCACCGGTCGCTGCG	optiValidation2_guide_416	553	0.0236054	38	0.0709776	3.00684	398
337	CCAGGCCCCCGGTATACCCG	optiValidation2_guide_2420	524	0.0223675	36	0.067242	3.00623	399
2098	CGGTTCTTTATTGCTCGCAG	optiValidation2_guide_3941	321	0.0137022	22	0.0410923	2.99895	400
549	CCGAGTGACAAACATACCGG	optiValidation2_guide_938	978	0.041747	67	0.125145	2.99769	401
3889	AGGGTGTCAGCCGATTACCG	optiValidation2_guide_640	336	0.0143425	23	0.0429601	2.9953	402
3446	AGTGCCGCAAGCCTTACGAG	optiValidation2_guide_850	672	0.0286851	46	0.0859203	2.9953	403
3112	CCGACCGTTTTTCCAAGGGA	optiValidation2_guide_3534	1038	0.0443082	71	0.132616	2.99304	404
2702	ACGTTAGCATGGTATCGAGG	optiValidation2_guide_1589	483	0.0206174	33	0.0616385	2.98964	405
3263	CCACAGTCATGCTCTCAGGA	optiValidation2_guide_4090	718	0.0306486	49	0.0915238	2.98623	406
1709	CATCTTGATTGAGTGACCGG	optiValidation2_guide_53	616	0.0262946	42	0.078449	2.98346	407
150	TCTAAGTCCACACAGTCAAA	optiValidation2_guide_1577	323	0.0137876	22	0.0410923	2.98038	408
1254	GCGCTGTCACTGGTGTGGGA	optiValidation2_guide_528	705	0.0300937	48	0.0896559	2.97923	409
1243	CGGCCTGGCACCTCTCAAGA	optiValidation2_guide_3673	720	0.030734	49	0.0915238	2.97793	410
2214	TGAAAAGACCATATACAGAG	optiValidation2_guide_3057	500	0.021343	34	0.0635063	2.9755	411
3772	CCGACGTATAGAACTCCCAA	optiValidation2_guide_4163	574	0.0245018	39	0.0728455	2.97306	412
1250	CCGCCGGTAACTCAGATCCG	optiValidation2_guide_1425	1165	0.0497293	79	0.147559	2.96724	413
1045	AAGAACTCCAGTGCATCAGG	optiValidation2_guide_989	531	0.0226663	36	0.067242	2.9666	414
611	GCTCGGGGAATACCGTAGCG	optiValidation2_guide_1515	974	0.0415763	66	0.123277	2.96508	415
3719	CATCCTCGTATCCTGTGAGA	optiValidation2_guide_120	576	0.0245872	39	0.0728455	2.96274	416
2426	TCGCCCTCAATGGAAAAGAG	optiValidation2_guide_1116	311	0.0132754	21	0.0392245	2.95468	417
3497	CCTGATACAATATCTATAAA	optiValidation2_guide_978	237	0.0101166	16	0.0298853	2.95409	418
4012	GCTCTGCGATAATTAATAAG	optiValidation2_guide_462	282	0.0120375	19	0.0354888	2.94819	419
1735	CGTCGATCAGAAAAGCTAGA	optiValidation2_guide_231	520	0.0221968	35	0.0653741	2.94521	420
2000	TGTAACCTCACGTTACGAAA	optiValidation2_guide_3922	357	0.0152389	24	0.044828	2.94167	421
4172	CCTGACCTCCTCACATACGG	optiValidation2_guide_4223	596	0.0254409	40	0.0747133	2.93674	422
1892	AAAGGGCGAGCCCTGAAACA	optiValidation2_guide_1042	328	0.014001	22	0.0410923	2.93495	423
2071	CAAGTTTGTGAACAGACCCA	optiValidation2_guide_1241	522	0.0222821	35	0.0653741	2.93392	424
3087	CATATTACAGATTAAATCCG	optiValidation2_guide_3912	538	0.0229651	36	0.067242	2.928	425
2532	ACTATACCTTTGCTGATGCA	optiValidation2_guide_3997	299	0.0127631	20	0.0373566	2.92692	426
3156	CAAGAAGGCCCCGATTAAAG	optiValidation2_guide_872	823	0.0351307	55	0.102731	2.92425	427
2831	AGGAGCCTTCCTTTTTTAGA	optiValidation2_guide_3637	360	0.015367	24	0.044828	2.91716	428
1763	ACACAGTAACCCCCTAAGAA	optiValidation2_guide_1028	645	0.0275325	43	0.0803168	2.91716	429
3655	ACGGAACCTGTTCAGTGGAG	optiValidation2_guide_1853	616	0.0262946	41	0.0765811	2.91242	430
365	CATTCCCGACGGACACGGAG	optiValidation2_guide_1671	692	0.0295388	46	0.0859203	2.90873	431
2034	CTGCTATTCTAAGTATCCCA	optiValidation2_guide_1128	166	0.00708589	11	0.0205462	2.89959	432
2290	TAGAAACAAGCCCTGACAGG	optiValidation2_guide_455	498	0.0212577	33	0.0616385	2.89959	433
3616	CTGAGCAAACTCCAGTACAG	optiValidation2_guide_2720	604	0.0257824	40	0.0747133	2.89784	434
546	CCTCAGGTCGTTCTTAACCA	optiValidation2_guide_2448	591	0.0252275	39	0.0728455	2.88754	435
2995	CCTACAATTGATCCTTGGCA	optiValidation2_guide_2962	652	0.0278313	43	0.0803168	2.88584	436
3965	TAGGATTGCAAGGCTTCCCA	optiValidation2_guide_4190	258	0.011013	17	0.0317531	2.88324	437
1790	CTGAAATTTCCATAACACGG	optiValidation2_guide_133	486	0.0207454	32	0.0597706	2.88114	438
1433	CGGTAAGTAATGCTTCCGCA	optiValidation2_guide_1479	760	0.0324414	50	0.0933916	2.87878	439
2774	CGTTTCTATGATCAATCACG	optiValidation2_guide_2953	289	0.0123363	19	0.0354888	2.87678	440
1998	CTGTGGATCCAATTTCTACG	optiValidation2_guide_1972	578	0.0246726	38	0.0709776	2.87678	441
1794	AGTCCCACATTTACGCCAGA	optiValidation2_guide_1179	259	0.0110557	17	0.0317531	2.87211	442
889	CGACTCAGCAAGACTTGAGA	optiValidation2_guide_3021	625	0.0266788	41	0.0765811	2.87048	443
414	CGATGAATAGGGACAATAAG	optiValidation2_guide_862	595	0.0253982	39	0.0728455	2.86813	444
2636	AATGTAACTTCTGTGAAAAG	optiValidation2_guide_1821	473	0.0201905	31	0.0579028	2.86782	445
891	CGACGACGAATCTTTTGCAG	optiValidation2_guide_655	763	0.0325695	50	0.0933916	2.86746	446
1200	AGGGCTAACGTCGAGTCAAG	optiValidation2_guide_1162	459	0.0195929	30	0.056035	2.85996	447
2619	CCTCAAAACCGCAATCAAGA	optiValidation2_guide_1505	843	0.0359844	55	0.102731	2.85487	448
2212	ACTTACTTAACTTATTGCCA	optiValidation2_guide_3146	246	0.0105008	16	0.0298853	2.84601	449
1136	ACTCCCATTACTAAATGGGG	optiValidation2_guide_1920	431	0.0183977	28	0.0522993	2.84271	450
3018	AGTCTGGTACCAATATCCAA	optiValidation2_guide_1050	231	0.00986049	15	0.0280175	2.84139	451
646	CTATCTTGCTTCCCTTCCAA	optiValidation2_guide_2303	247	0.0105435	16	0.0298853	2.83449	452
1346	CTTCCCGTTCGCTATTACGG	optiValidation2_guide_2638	511	0.0218126	33	0.0616385	2.82582	453
2623	CGATGTCCACCATAGCAACA	optiValidation2_guide_9	341	0.014556	22	0.0410923	2.82306	454
1571	CTTGGGCGACGTTTGTTCGA	optiValidation2_guide_3357	543	0.0231786	35	0.0653741	2.82046	455
1184	TGAATGCCAAAGGCACCAGG	optiValidation2_guide_1169	404	0.0172452	26	0.0485636	2.81607	456
1472	TAAAGACTATGTCCACCCAG	optiValidation2_guide_2768	249	0.0106288	16	0.0298853	2.81172	457
3911	GTATCACAATGTTCTAGGGG	optiValidation2_guide_729	453	0.0193368	29	0.0541671	2.80125	458
3552	ATTCATGATAACACTTTGGG	optiValidation2_guide_4136	250	0.0106715	16	0.0298853	2.80047	459
3759	CCTTGACCTTCATAAAGGGG	optiValidation2_guide_1455	422	0.0180135	27	0.0504315	2.79964	460
1598	GTACGTAACCAATTGCCCCA	optiValidation2_guide_490	516	0.022026	33	0.0616385	2.79844	461
3754	TCTTGGGCCATACCTATAAA	optiValidation2_guide_216	172	0.00734201	11	0.0205462	2.79844	462
1431	CCTTGTGCCGGGCATCCAAG	optiValidation2_guide_1365	360	0.015367	23	0.0429601	2.79561	463
1545	CGAACACATGGATAGACGAA	optiValidation2_guide_1323	690	0.0294534	44	0.0821846	2.79033	464
1934	CCTCATGAAGAACCAATACG	optiValidation2_guide_3423	613	0.0261666	39	0.0728455	2.78391	465
849	CCATCTCCAACCTCTAGACG	optiValidation2_guide_629	519	0.0221541	33	0.0616385	2.78226	466
2475	CTGGCCCACAAATCAATCCA	optiValidation2_guide_2677	755	0.032228	48	0.0896559	2.78193	467
2866	CCTCTCGCCAGCCATCTCAA	optiValidation2_guide_499	378	0.0161353	24	0.044828	2.77825	468
2106	TTTGGCCGTCGTGCGACAGA	optiValidation2_guide_1783	205	0.00875065	13	0.0242818	2.77486	469
812	CCGGGACCTAGAGTAAGCAA	optiValidation2_guide_3752	1184	0.0505403	75	0.140087	2.77179	470
801	GCTTCGGATCTACCTTTAAA	optiValidation2_guide_1590	459	0.0195929	29	0.0541671	2.76463	471
2401	CGTTCCGTTACGGCTCTGAA	optiValidation2_guide_3282	365	0.0155804	23	0.0429601	2.75731	472
4163	CATACAATTACGGAGATGAA	optiValidation2_guide_3641	762	0.0325268	48	0.0896559	2.75637	473
3414	CGAGGTGGCATACTTCGAAG	optiValidation2_guide_1588	762	0.0325268	48	0.0896559	2.75637	474
1947	AGGACGTCTTCCGCAATACA	optiValidation2_guide_1675	525	0.0224102	33	0.0616385	2.75046	475
2143	ACACCTTAAAACACGCCGAG	optiValidation2_guide_2422	1003	0.0428142	63	0.117673	2.74847	476
1512	CCTACTCCTCAATTTCCCCA	optiValidation2_guide_3387	414	0.017672	26	0.0485636	2.74805	477
896	CTAATCAGCTTCGCGTCCAA	optiValidation2_guide_2615	223	0.009519	14	0.0261497	2.7471	478
3786	CCAAAGGTCACAACTTTCGG	optiValidation2_guide_4164	685	0.02924	43	0.0803168	2.74681	479
2590	CAACTCCGATCAGCAATGCA	optiValidation2_guide_2345	924	0.039442	58	0.108334	2.74668	480
1958	TAGGATAAAGCAGTTAACAA	optiValidation2_guide_3918	431	0.0183977	27	0.0504315	2.74118	481
641	GATAGGTCTATTAAGTCGAG	optiValidation2_guide_3734	559	0.0238615	35	0.0653741	2.73973	482
2640	TCACCAAATCTAGATAAAAG	optiValidation2_guide_4086	576	0.0245872	36	0.067242	2.73484	483
1547	TTGTTATTAATCCTACTAAG	optiValidation2_guide_672	112	0.00478084	7	0.0130748	2.73484	484
1791	AGACTACCCTGAAATTTACA	optiValidation2_guide_2214	272	0.0116106	17	0.0317531	2.73484	485
1967	GTAATCCGAGATATTCGACG	optiValidation2_guide_3979	401	0.0171171	25	0.0466958	2.72802	486
1334	CCGAAAAAAACGTTGCGGAA	optiValidation2_guide_806	722	0.0308194	45	0.0840524	2.72726	487
2411	GGATGTCTCCGAATTTTAAG	optiValidation2_guide_2171	225	0.00960437	14	0.0261497	2.72268	488
2924	CTAGTGCCAGAAATGCTAGA	optiValidation2_guide_3517	611	0.0260812	38	0.0709776	2.72141	489
247	CTAAGGCACTCCTATAGCCG	optiValidation2_guide_827	515	0.0219833	32	0.0597706	2.71891	490
2045	CAGGGCCAAACCGTTTAAAA	optiValidation2_guide_600	934	0.0398688	58	0.108334	2.71727	491
1768	GCTAGCCCCTACCAAACGAA	optiValidation2_guide_3893	451	0.0192514	28	0.0522993	2.71664	492
2512	GCACTTATAACGGCGTTAAA	optiValidation2_guide_3916	436	0.0186111	27	0.0504315	2.70975	493
3413	CGTTCCTTTTGCCAGTTACA	optiValidation2_guide_2049	194	0.0082811	12	0.022414	2.70664	494
3630	ACAGGGGACGGCAAGTTACA	optiValidation2_guide_290	971	0.0414482	60	0.11207	2.70386	495
2550	ATTGGTACTCCGGTATCAAG	optiValidation2_guide_3483	405	0.0172879	25	0.0466958	2.70107	496
2470	CAGGGAAACTGCGCTTGACA	optiValidation2_guide_2689	875	0.0373503	54	0.100863	2.70046	497
1320	CTTGGTCACCGGTCGCTGAG	optiValidation2_guide_2935	308	0.0131473	19	0.0354888	2.69932	498
718	GTAACGATTTCCACTTGCCA	optiValidation2_guide_419	292	0.0124643	18	0.033621	2.69737	499
2922	GCTCCTCGCGATTCACCCAG	optiValidation2_guide_1467	601	0.0256543	37	0.0691098	2.69388	500
3932	CGGAGGCCTCCGACTAGAAG	optiValidation2_guide_4185	488	0.0208308	30	0.056035	2.69	501
390	CCTATCGTTTGAGCGTAGCA	optiValidation2_guide_2860	537	0.0229224	33	0.0616385	2.689	502
2900	AGAAGCCATTTAATTCCCCA	optiValidation2_guide_3514	293	0.012507	18	0.033621	2.68817	503
881	AATAAGCCTCCCCAGCTGAG	optiValidation2_guide_572	440	0.0187819	27	0.0504315	2.68511	504
4215	TGATAAAGCAGGGCACTCAA	optiValidation2_guide_107	571	0.0243738	35	0.0653741	2.68215	505
1783	AATTCGGGCATAGCAAGGGG	optiValidation2_guide_3896	343	0.0146413	21	0.0392245	2.67902	506
1294	CTATCGGCAGTCCATTTCCA	optiValidation2_guide_255	343	0.0146413	21	0.0392245	2.67902	507
3970	CCGAGGGTAAGAACGCAAAG	optiValidation2_guide_1861	1128	0.0481499	69	0.12888	2.67665	508
2435	CTATTTTTTTAATATCGAGG	optiValidation2_guide_3794	180	0.0076835	11	0.0205462	2.67406	509
3252	CTAGCCTTAACCCAGCCGAA	optiValidation2_guide_3547	606	0.0258678	37	0.0691098	2.67166	510
3578	TAGGGAAACTGCGCGTGACA	optiValidation2_guide_3490	838	0.035771	51	0.0952594	2.66304	511
1749	GGGCTAAACTGATCAACCCG	optiValidation2_guide_3410	608	0.0259531	37	0.0691098	2.66287	512
2989	CCGGCACCCATTCATCAAGG	optiValidation2_guide_117	674	0.0287704	41	0.0765811	2.6618	513
559	GCACTTGTAGCGGCGTTAAA	optiValidation2_guide_3041	461	0.0196783	28	0.0522993	2.65772	514
642	CCTGCCGTCATTATTTACCA	optiValidation2_guide_2261	527	0.0224956	32	0.0597706	2.657	515
2443	CCTCGAGCATTTATGAACGA	optiValidation2_guide_1045	561	0.0239469	34	0.0635063	2.65196	516
626	GGGGGTCGCTTCAATTTACA	optiValidation2_guide_3781	512	0.0218553	31	0.0579028	2.64937	517
1475	GTAGCGTATGCTCCTATACG	optiValidation2_guide_2901	314	0.0134034	19	0.0354888	2.64774	518
1784	CGGTGGCCTCCTACTAGAAG	optiValidation2_guide_3415	496	0.0211723	30	0.056035	2.64662	519
4112	CTAAAATTACACCAACCAAG	optiValidation2_guide_3636	480	0.0204893	29	0.0541671	2.64368	520
447	GGGTTGCCCAAGCCGCACAA	optiValidation2_guide_3300	381	0.0162634	23	0.0429601	2.64152	521
2712	CGGCGATGACATAAAAGGGA	optiValidation2_guide_4023	1029	0.043924	62	0.115806	2.6365	522
2115	GTACTCATATTTCCTCAGGG	optiValidation2_guide_1064	249	0.0106288	15	0.0280175	2.63599	523
3308	AAGGGGTTTACATCGACCAA	optiValidation2_guide_1052	482	0.0205747	29	0.0541671	2.63271	524
205	CTGACCATTCCGTTATCACA	optiValidation2_guide_2078	416	0.0177574	25	0.0466958	2.62965	525
3744	CCGTAGACCTGACTTCTACG	optiValidation2_guide_4157	516	0.022026	31	0.0579028	2.62884	526
1313	TGAATTTCCTCGAATTTGCA	optiValidation2_guide_2280	217	0.00926288	13	0.0242818	2.62141	527
1595	TATGCAGGAGTAACAATCCA	optiValidation2_guide_1501	736	0.031417	44	0.0821846	2.61593	528
302	CTTACATGAATCGAGTGCAG	optiValidation2_guide_1542	419	0.0178855	25	0.0466958	2.61082	529
3577	CTGCCTGCCCGGTCTCCCAA	optiValidation2_guide_3229	587	0.0250567	35	0.0653741	2.60904	530
994	AGTGAAAACCTACCACACCA	optiValidation2_guide_436	387	0.0165195	23	0.0429601	2.60057	531
2791	CTGATAGAACACCCAACCCG	optiValidation2_guide_274	404	0.0172452	24	0.044828	2.59945	532
490	AAGCCCCTTGTCGCGATCCA	optiValidation2_guide_478	489	0.0208735	29	0.0541671	2.59502	533
614	TCAGTTCACGACCCGCTACA	optiValidation2_guide_1948	489	0.0208735	29	0.0541671	2.59502	534
3209	CAAGGTATTAAGGCTAAAAG	optiValidation2_guide_2371	658	0.0280875	39	0.0728455	2.59352	535
497	CGATAATAACCTCCACAGAG	optiValidation2_guide_2647	457	0.0195075	27	0.0504315	2.58523	536
3277	CTGAGGAGTTGCTCGAGACA	optiValidation2_guide_1257	830	0.0354295	49	0.0915238	2.58327	537
978	ACACTTAGAGATTAATGCCA	optiValidation2_guide_2882	629	0.0268496	37	0.0691098	2.57396	538
1271	CATTGGCAAATTAAACTGCA	optiValidation2_guide_1953	884	0.0377345	52	0.0971273	2.57396	539
3101	CGGATCTGTGCGGTGCGCGG	optiValidation2_guide_360	818	0.0349172	48	0.0896559	2.56767	540
3499	CCACTACCACCGACATCACG	optiValidation2_guide_1092	699	0.0298376	41	0.0765811	2.5666	541
3743	ACTGCATCTGCCCTTCACGG	optiValidation2_guide_524	512	0.0218553	30	0.056035	2.56391	542
864	TGGTTTGGAGGCAAGTGACA	optiValidation2_guide_1570	342	0.0145986	20	0.0373566	2.55891	543
4024	CATATATTCCAATCGTACAA	optiValidation2_guide_4197	513	0.021898	30	0.056035	2.55891	544
1518	CTACCCATCCGAATTTGCGG	optiValidation2_guide_472	821	0.0350453	48	0.0896559	2.55829	545
3538	ACTCGAGACTGAGTTCGAAA	optiValidation2_guide_3227	411	0.017544	24	0.044828	2.55518	546
33	TGAAAAGAACATCTACAGAG	optiValidation2_guide_2766	411	0.017544	24	0.044828	2.55518	547
624	CTAGTGACTGAAACGCCCGG	optiValidation2_guide_1951	925	0.0394846	54	0.100863	2.55449	548
3865	CGATATTGACCTCCACAGAG	optiValidation2_guide_4207	429	0.0183123	25	0.0466958	2.54996	549
814	AGTATATTCTTGTCTACGGA	optiValidation2_guide_2874	309	0.01319	18	0.033621	2.54897	550
719	TAGACCCACTTTCTTCCCAG	optiValidation2_guide_1778	292	0.0124643	17	0.0317531	2.54752	551
1981	CATCGGCAAATTAAACTGCA	optiValidation2_guide_70	928	0.0396127	54	0.100863	2.54623	552
287	CTAGGTGGCGCAAAACGCAA	optiValidation2_guide_719	894	0.0381614	52	0.0971273	2.54517	553
3300	GCGTTGCAAGTTGATTTACG	optiValidation2_guide_784	568	0.0242457	33	0.0616385	2.54224	554
958	TGAGCCCATTAACCTCCGGA	optiValidation2_guide_944	568	0.0242457	33	0.0616385	2.54224	555
2572	CCTACCCCACCAAAATCCCA	optiValidation2_guide_4005	551	0.02352	32	0.0597706	2.54126	556
2582	TCTCACAATACTAATATAGA	optiValidation2_guide_4006	293	0.012507	17	0.0317531	2.53882	557
457	AGACTACCCTGAAATTAACA	optiValidation2_guide_2862	483	0.0206174	28	0.0522993	2.53666	558
1341	CCGTCCCGAACCCTGATACA	optiValidation2_guide_1355	276	0.0117814	16	0.0298853	2.53666	559
3894	CCTGCCAACCATATACGCCG	optiValidation2_guide_4177	552	0.0235627	32	0.0597706	2.53666	560
1223	CTGGACCAAATGCCTCAAGG	optiValidation2_guide_1106	725	0.0309474	42	0.078449	2.53491	561
2271	CGTACAGTCTGCACTTCGAG	optiValidation2_guide_741	605	0.0258251	35	0.0653741	2.53142	562
650	CGAGGAACCACCCTTACACG	optiValidation2_guide_1794	761	0.0324841	44	0.0821846	2.52999	563
3114	ATAGGGACTGAGTAGACAAA	optiValidation2_guide_450	433	0.0184831	25	0.0466958	2.52641	564
3545	CTACACACCCAACAGTTCAA	optiValidation2_guide_118	797	0.0340208	46	0.0859203	2.52552	565
3488	CAAATGCTACGGCCTCTAAG	optiValidation2_guide_1917	607	0.0259105	35	0.0653741	2.52308	566
3801	CAACGCCCAACTCAGAGGAG	optiValidation2_guide_4167	538	0.0229651	31	0.0579028	2.52134	567
598	AATCAAGCCGGACCGAACCA	optiValidation2_guide_1686	643	0.0274472	37	0.0691098	2.51792	568
3388	GCACATGACCGTCATTCGAG	optiValidation2_guide_159	574	0.0245018	33	0.0616385	2.51567	569
1781	CAGATATCCAGTTCACCCCG	optiValidation2_guide_2774	522	0.0222821	30	0.056035	2.51479	570
981	TGTACGGCATGAAATTGGGG	optiValidation2_guide_4047	627	0.0267642	36	0.067242	2.51239	571
342	CTTTTTCCCTTACTGATGAA	optiValidation2_guide_3497	122	0.0052077	7	0.0130748	2.51067	572
2482	CATAATATAAAAGTATTGAG	optiValidation2_guide_2203	645	0.0275325	37	0.0691098	2.51011	573
3989	CGGATAAGCTTACTAAGGAG	optiValidation2_guide_2701	663	0.0283009	38	0.0709776	2.50796	574
2693	ACACAGTCATGCTCTCACGA	optiValidation2_guide_3625	995	0.0424727	57	0.106466	2.5067	575
2673	CATGATATAAAAGTATTAAG	optiValidation2_guide_2204	419	0.0178855	24	0.044828	2.50639	576
4217	CTATAGACAGACCCTTGACA	optiValidation2_guide_574	524	0.0223675	30	0.056035	2.50519	577
1463	TCGGGGATATCGTTTCTGGA	optiValidation2_guide_1824	437	0.0186538	25	0.0466958	2.50328	578
2185	CGGGTCCATATTCCATCGGG	optiValidation2_guide_3445	682	0.0291119	39	0.0728455	2.50226	579
419	CGAAACGACTGATTAAACGG	optiValidation2_guide_3701	1102	0.0470401	63	0.117673	2.50156	580
3165	AAAGCACACAATCAACGGCA	optiValidation2_guide_1808	385	0.0164341	22	0.0410923	2.50042	581
114	GAGGCTACTGATCTACAAAA	optiValidation2_guide_2212	508	0.0216845	29	0.0541671	2.49796	582
944	CAATGTTTCATTGATTGCAG	optiValidation2_guide_173	403	0.0172025	23	0.0429601	2.49732	583
3129	CAGTGACCAACCATTCGCCA	optiValidation2_guide_697	668	0.0285143	38	0.0709776	2.48919	584
1183	CTATTGGCTACTTTAATAAG	optiValidation2_guide_2130	406	0.0173306	23	0.0429601	2.47887	585
1141	CGGCCTAGATAACAGAGGCG	optiValidation2_guide_2575	831	0.0354721	47	0.0877881	2.47485	586
2860	CTTCCGCCCTCGGCTTGGCA	optiValidation2_guide_308	266	0.0113545	15	0.0280175	2.46752	587
955	CGGCCTCTCATGCCTTGGCA	optiValidation2_guide_1051	621	0.0265081	35	0.0653741	2.4662	588
261	CTATTGGACCGCTATACCGA	optiValidation2_guide_3559	657	0.0280448	37	0.0691098	2.46427	589
3009	GCAGTAAATGTGGTGAGAGG	optiValidation2_guide_584	711	0.0303498	40	0.0747133	2.46174	590
102	GCGGATCAATAACAGTACAG	optiValidation2_guide_1327	480	0.0204893	27	0.0504315	2.46135	591
2063	CTGCGGCCATACCAACCACA	optiValidation2_guide_247	605	0.0258251	34	0.0635063	2.45909	592
3554	CTATTTTAACCCCCGCCGCA	optiValidation2_guide_793	464	0.0198064	26	0.0485636	2.45192	593
890	ATTTTGGCAGCGGTACTAGG	optiValidation2_guide_2808	250	0.0106715	14	0.0261497	2.45041	594
3280	ACGACGCTTCTACCAAGACG	optiValidation2_guide_2820	608	0.0259531	34	0.0635063	2.44696	595
2211	GAACCTAGCATTTATTTGAA	optiValidation2_guide_2596	340	0.0145133	19	0.0354888	2.44527	596
4233	CAGAATATAACCTCTCAAAG	optiValidation2_guide_1346	591	0.0252275	33	0.0616385	2.44331	597
828	CGGGCTGCATTCGCGCTGCA	optiValidation2_guide_3332	591	0.0252275	33	0.0616385	2.44331	598
2062	AAGCGTATACGCGTGAGGAA	optiValidation2_guide_3934	449	0.0191661	25	0.0466958	2.43638	599
4222	ATGATGATTACCCCGAGGAA	optiValidation2_guide_3262	503	0.0214711	28	0.0522993	2.4358	600
3798	CGTCTCCGCAAGACTTGAGA	optiValidation2_guide_3826	234	0.00998855	13	0.0242818	2.43097	601
751	CTTGATAGCACGTTTCGAAA	optiValidation2_guide_1244	306	0.0130619	17	0.0317531	2.43097	602
3282	GGAAAATAAAATCTACGGCA	optiValidation2_guide_411	450	0.0192087	25	0.0466958	2.43097	603
407	AATAGGGCTCCTATAACACA	optiValidation2_guide_1569	434	0.0185258	24	0.044828	2.41976	604
2637	CTTCCTTTACCCAATTCAGA	optiValidation2_guide_2064	217	0.00926288	12	0.022414	2.41976	605
1944	CTTCGGTGCTACAAGTGAAG	optiValidation2_guide_494	670	0.0285997	37	0.0691098	2.41645	606
3875	AGAGGCTCACATTCACCGCG	optiValidation2_guide_223	471	0.0201052	26	0.0485636	2.41548	607
3864	CCACCCAATTGCTATTCCAG	optiValidation2_guide_1308	888	0.0379053	49	0.0915238	2.41454	608
1481	CATCTTGATTGAGTGACAGG	optiValidation2_guide_2343	671	0.0286424	37	0.0691098	2.41285	609
3099	CTGGACGAACTACCTCTAGA	optiValidation2_guide_731	762	0.0325268	42	0.078449	2.41182	610
2436	CCTGCCCCACACGAATGCAA	optiValidation2_guide_1860	490	0.0209162	27	0.0504315	2.41112	611
73	CCGTTCTTTATTGCTTGCAG	optiValidation2_guide_2328	400	0.0170744	22	0.0410923	2.40666	612
3256	CGTCATATCCGCGCGAACAG	optiValidation2_guide_1554	600	0.0256117	33	0.0616385	2.40666	613
2103	CGACCCGGCGGCCAACTGAA	optiValidation2_guide_1798	837	0.0357283	46	0.0859203	2.40483	614
145	TGATACAATTTAGCTACAGA	optiValidation2_guide_3015	346	0.0147694	19	0.0354888	2.40286	615
962	CTTGGTCTTACCCCGTCACA	optiValidation2_guide_372	493	0.0210442	27	0.0504315	2.39645	616
2996	GGGCTGAACTGATCAACCCG	optiValidation2_guide_1066	420	0.0179282	23	0.0429601	2.39624	617
78	ACTATACCTTTGCTGACGCA	optiValidation2_guide_511	274	0.011696	15	0.0280175	2.39548	618
1013	CCTTTAGTTCTAACAATGAA	optiValidation2_guide_3521	659	0.0281301	36	0.067242	2.39039	619
1919	CGTTTTTATGATCAATCCCG	optiValidation2_guide_2391	403	0.0172025	22	0.0410923	2.38874	620
2026	ATGGCACTACCACAATCAGA	optiValidation2_guide_2787	568	0.0242457	31	0.0579028	2.38817	621
4187	AGGGGCGGCCAGTTATGCAG	optiValidation2_guide_77	901	0.0384602	49	0.0915238	2.3797	622
3520	CTGGACCACATTGCAAGAGA	optiValidation2_guide_195	755	0.032228	41	0.0765811	2.37623	623
1014	CCACTACCCGTGTTTTACGG	optiValidation2_guide_3016	571	0.0243738	31	0.0579028	2.37562	624
2438	TAAGCTAACTGCCAGAGAGA	optiValidation2_guide_1249	443	0.0189099	24	0.044828	2.3706	625
4066	AGACGTAATTTGCATAGAAA	optiValidation2_guide_1416	499	0.0213004	27	0.0504315	2.36763	626
1744	CAGGGAAACTGAGCGTGACA	optiValidation2_guide_2672	1183	0.0504977	64	0.119541	2.36726	627
515	GAGGCCCAAACCTCACGCAG	optiValidation2_guide_3038	444	0.0189526	24	0.044828	2.36526	628
2035	CCGTTCAACACGGTATTGCG	optiValidation2_guide_3538	724	0.0309047	39	0.0728455	2.3571	629
3092	CGATGACAAATCGATCTCCG	optiValidation2_guide_3199	558	0.0238188	30	0.056035	2.35255	630
2263	GATACTCTTCAAGATTTGGA	optiValidation2_guide_1253	242	0.01033	13	0.0242818	2.3506	631
1155	CCTTGCCAAACGCCTAAAAG	optiValidation2_guide_3382	410	0.0175013	22	0.0410923	2.34796	632
2723	AGAAACCATTTAATTCCCCA	optiValidation2_guide_72	336	0.0143425	18	0.033621	2.34415	633
3350	CCACTATGATTGAATATACA	optiValidation2_guide_284	691	0.0294961	37	0.0691098	2.34301	634
1800	ATTTAAGATTGGCAATCAAA	optiValidation2_guide_1480	411	0.017544	22	0.0410923	2.34224	635
4016	CATATAAGAACCACGTTACA	optiValidation2_guide_2483	637	0.027191	34	0.0635063	2.33556	636
2838	AATCCGGGTATAGCAAGGGG	optiValidation2_guide_3550	731	0.0312035	39	0.0728455	2.33453	637
1585	GTAAGCTATACCCTGCAACA	optiValidation2_guide_1319	450	0.0192087	24	0.044828	2.33373	638
2379	CATCTAAGAACCGCGTTACA	optiValidation2_guide_3156	675	0.0288131	36	0.067242	2.33373	639
912	CAGCACGAACCAGATTAGAG	optiValidation2_guide_3070	1075	0.0458876	57	0.106466	2.32016	640
2744	CCGTCCTACGCGCCTTTCGA	optiValidation2_guide_3991	151	0.0064456	8	0.0149427	2.31827	641
1843	GCAACTTGTCGTGCGCCCAG	optiValidation2_guide_1616	510	0.0217699	27	0.0504315	2.31657	642
2262	GCTGAAACATGATCGCCACG	optiValidation2_guide_1690	624	0.0266361	33	0.0616385	2.31409	643
875	AATGTCTAACCTAAGATGCA	optiValidation2_guide_2785	322	0.0137449	17	0.0317531	2.31017	644
2432	ACTACACTCTATTCGACCAG	optiValidation2_guide_4082	607	0.0259105	32	0.0597706	2.30681	645
1624	CATGTTTATACTGTACACAA	optiValidation2_guide_2275	247	0.0105435	13	0.0242818	2.30302	646
3059	CTGAGCAAACACCAGTCCAG	optiValidation2_guide_2963	798	0.0340635	42	0.078449	2.30302	647
1767	TATAAATGACCTTCTTTAGA	optiValidation2_guide_2034	247	0.0105435	13	0.0242818	2.30302	648
1632	CGGTCTGGCCCCTAGATAGA	optiValidation2_guide_3870	628	0.0268069	33	0.0616385	2.29935	649
2085	GCTTTAGACAAAGTTCTGAA	optiValidation2_guide_1142	343	0.0146413	18	0.033621	2.29631	650
1649	CTTATTTACCACACTCAAAA	optiValidation2_guide_3396	286	0.0122082	15	0.0280175	2.29497	651
3283	GCAGACCTTTGGTCTTCAAG	optiValidation2_guide_3548	229	0.00977512	12	0.022414	2.29296	652
1434	CCGAGAGCTCTCACTAGCCG	optiValidation2_guide_4097	650	0.027746	34	0.0635063	2.28885	653
1342	CTGCCCTCTGCATTGAAACG	optiValidation2_guide_3375	728	0.0310755	38	0.0709776	2.28404	654
2213	TGGGGCCCTCTATTGACGAG	optiValidation2_guide_2597	460	0.0196356	24	0.044828	2.28299	655
1614	GGGGCCGGATTGGCAATAGA	optiValidation2_guide_518	556	0.0237335	29	0.0541671	2.28231	656
2890	CGAGCCTCCCATGAGTCACG	optiValidation2_guide_3513	633	0.0270203	33	0.0616385	2.28119	657
808	CCGAGGAGTACCGATATCAA	optiValidation2_guide_763	768	0.0327829	40	0.0747133	2.27903	658
2267	GTAGTGAAACCGTCTCAGGA	optiValidation2_guide_1837	480	0.0204893	25	0.0466958	2.27903	659
3886	CAAATCCTCAACTATCGGCG	optiValidation2_guide_869	634	0.027063	33	0.0616385	2.27759	660
3348	CATATCCTTAAGAATTAGCA	optiValidation2_guide_1743	481	0.020532	25	0.0466958	2.27429	661
4165	CATCCTTGTATCCTGTGAGA	optiValidation2_guide_2440	520	0.0221968	27	0.0504315	2.27202	662
773	CGTTACCTCACGCATTCAGG	optiValidation2_guide_63	443	0.0189099	23	0.0429601	2.27183	663
4028	TGAACAATTTGACAAATCCA	optiValidation2_guide_1141	309	0.01319	16	0.0298853	2.26575	664
1392	AAATCAAGATCTTAACAAAA	optiValidation2_guide_4062	425	0.0181416	22	0.0410923	2.26509	665
2144	TAATGAACCCCAATACCGAA	optiValidation2_guide_592	541	0.0230932	28	0.0522993	2.26471	666
3206	ACTACACTTTATCCGACCAG	optiValidation2_guide_2485	368	0.0157085	19	0.0354888	2.25921	667
4131	CGTTCCCCTTAAGATTACAA	optiValidation2_guide_910	252	0.0107569	13	0.0242818	2.25733	668
305	CTTGTGTAATGTTAACCCAA	optiValidation2_guide_4041	467	0.0199344	24	0.044828	2.24877	669
2918	GCACTGGTAACGGCGTTAAA	optiValidation2_guide_4053	702	0.0299656	36	0.067242	2.24397	670
3522	CTACCGATAAGTATATGACG	optiValidation2_guide_1521	586	0.0250141	30	0.056035	2.24014	671
854	CTGTAATGTTTATTATGCCA	optiValidation2_guide_3756	586	0.0250141	30	0.056035	2.24014	672
1902	CTGCAGGCTTTAAAGCGACA	optiValidation2_guide_2324	860	0.03671	44	0.0821846	2.23875	673
206	GAGCCGCGATTTGCTCCGAA	optiValidation2_guide_3670	606	0.0258678	31	0.0579028	2.23841	674
3202	TAGGTGGCTTACCCTCCCGA	optiValidation2_guide_435	391	0.0166903	20	0.0373566	2.23823	675
1161	CAGTAATAAGCACCATTGCG	optiValidation2_guide_2984	704	0.030051	36	0.067242	2.23759	676
3555	CTGCGACAAGAGCAACTAAG	optiValidation2_guide_1893	626	0.0267215	32	0.0597706	2.2368	677
3393	CATCCCGTTCGCTATTACAG	optiValidation2_guide_4111	763	0.0325695	39	0.0728455	2.23662	678
4177	CTAGAAAGTGAGACGTACAG	optiValidation2_guide_2040	646	0.0275752	33	0.0616385	2.23528	679
2171	CATGTATGCTTGAAGTCCGA	optiValidation2_guide_2018	333	0.0142145	17	0.0317531	2.23386	680
1265	CAATTCCTTTGCGATACAAA	optiValidation2_guide_1461	353	0.0150682	18	0.033621	2.23125	681
2625	ACTGCATCTGCCCTTTACGG	optiValidation2_guide_2277	510	0.0217699	26	0.0485636	2.23077	682
2208	TAAAGGTACGTTCCATTGCG	optiValidation2_guide_2393	491	0.0209589	25	0.0466958	2.22797	683
1863	GTGCACATATGGGCTAGGCG	optiValidation2_guide_1275	905	0.0386309	46	0.0859203	2.22413	684
381	CCTGACATCCTCACATCCGG	optiValidation2_guide_2350	551	0.02352	28	0.0522993	2.22361	685
3383	CGGCGATGACGTAAAAGGGA	optiValidation2_guide_889	709	0.0302644	36	0.067242	2.22181	686
1886	GTAGCATATGCTCCTATCCG	optiValidation2_guide_3897	197	0.00840916	10	0.0186783	2.22119	687
4039	GGTTCATCCTATTAAACGGA	optiValidation2_guide_3631	296	0.0126351	15	0.0280175	2.21744	688
731	CCTTACGCATAATCTTTCAA	optiValidation2_guide_3746	375	0.0160073	19	0.0354888	2.21704	689
3315	CTACAGACTTGGGTGCGAAA	optiValidation2_guide_1547	652	0.0278313	33	0.0616385	2.21471	690
4058	TGTGCAGGACCAGAGCCACA	optiValidation2_guide_2999	573	0.0244591	29	0.0541671	2.2146	691
1805	GTTTCAGGATTTTTTCGAAA	optiValidation2_guide_486	277	0.011824	14	0.0261497	2.21156	692
193	CAATTACCTATTGCACTGGG	optiValidation2_guide_2851	673	0.0287277	34	0.0635063	2.21063	693
4065	CAAGAGCCCACGGTTCCACG	optiValidation2_guide_2059	970	0.0414055	49	0.0915238	2.21042	694
2456	GCTGCAGCCTAGCAAATCAA	optiValidation2_guide_589	317	0.0135315	16	0.0298853	2.20857	695
2461	GTTATACACATGTAGAGGGG	optiValidation2_guide_1414	456	0.0194649	23	0.0429601	2.20706	696
2920	ACAACTCCTTTCCTGATACG	optiValidation2_guide_514	139	0.00593337	7	0.0130748	2.20361	697
483	CTGCGGTCTCCCCAACAGGA	optiValidation2_guide_3713	775	0.0330817	39	0.0728455	2.20198	698
2480	TATGTGGGCCGCACAACCCG	optiValidation2_guide_304	517	0.0220687	26	0.0485636	2.20056	699
593	CGGAGGGCCTAAGTTTAAAA	optiValidation2_guide_1682	1094	0.0466986	55	0.102731	2.19987	700
293	CATATTACAGATTTAATCCG	optiValidation2_guide_1313	557	0.0237762	28	0.0522993	2.19965	701
459	CCAACGACTAACCTGCGGGG	optiValidation2_guide_1575	598	0.0255263	30	0.056035	2.19519	702
3097	ACGCCTGTATCCCTGAGAAG	optiValidation2_guide_2510	460	0.0196356	23	0.0429601	2.18787	703
3562	ACTATACCTTTGCTGCCGCA	optiValidation2_guide_3576	220	0.00939094	11	0.0205462	2.18787	704
2107	CCAACGTCCGACCAACGCAG	optiValidation2_guide_2922	540	0.0230505	27	0.0504315	2.18787	705
2753	CTGTTATATATTCAACCCGA	optiValidation2_guide_213	321	0.0137022	16	0.0298853	2.18105	706
2819	AGGGCCAGCTACTATATCCG	optiValidation2_guide_849	683	0.0291546	34	0.0635063	2.17826	707
108	CCAAGAAACCGTGTGCCGAG	optiValidation2_guide_902	543	0.0231786	27	0.0504315	2.17578	708
2541	ACTACCGGAGGTCCTAAACG	optiValidation2_guide_1443	726	0.0309901	36	0.067242	2.16979	709
4136	ATGAACGCCGCAGCTAGCCA	optiValidation2_guide_196	565	0.0241176	28	0.0522993	2.16851	710
3452	TCAAGTAAAGGTGTGCACAG	optiValidation2_guide_403	505	0.0215565	25	0.0466958	2.16621	711
2070	TAATACCTAGTAGTACTAGA	optiValidation2_guide_3937	283	0.0120802	14	0.0261497	2.16468	712
3778	ATATCTGCAGATTCGACCGA	optiValidation2_guide_1627	344	0.014684	17	0.0317531	2.16243	713
1241	CAAACCCCCGCCAAGTACGA	optiValidation2_guide_154	992	0.0423446	49	0.0915238	2.1614	714
1399	CCAGGATAATACCATCCAAA	optiValidation2_guide_1558	628	0.0268069	31	0.0579028	2.16	715
1365	AATTGTCCTGCGCTATTAGA	optiValidation2_guide_131	223	0.009519	11	0.0205462	2.15844	716
83	TATATTGATACCATATAGAG	optiValidation2_guide_567	284	0.0121229	14	0.0261497	2.15705	717
1261	CGTGACAGCAGCATACTGAA	optiValidation2_guide_2892	771	0.032911	38	0.0709776	2.15665	718
1875	TATTCAAATATACTTCCGCA	optiValidation2_guide_140	183	0.00781156	9	0.0168105	2.152	719
977	CGATACCTCCCCAATAGCCA	optiValidation2_guide_1996	590	0.0251848	29	0.0541671	2.15079	720
3933	CATCTAGATTGAGTGACCGG	optiValidation2_guide_2629	815	0.0347892	40	0.0747133	2.1476	721
3196	CCGAGAACTCTCTCTAGCCG	optiValidation2_guide_4079	816	0.0348319	40	0.0747133	2.14497	722
3449	GGACCGCTAACCTTGCCCCA	optiValidation2_guide_1266	531	0.0226663	26	0.0485636	2.14255	723
1047	TAAGAATCCCTCCTGATGAA	optiValidation2_guide_479	184	0.00785424	9	0.0168105	2.14031	724
3820	TGTTCAGGACCAGAGCCCCA	optiValidation2_guide_4169	471	0.0201052	23	0.0429601	2.13677	725
394	CCGGGGACCCGCATACACAG	optiValidation2_guide_2645	758	0.0323561	37	0.0691098	2.13591	726
3303	ACTAGTAGCGACCTTTGCGG	optiValidation2_guide_34	533	0.0227517	26	0.0485636	2.13451	727
1687	CCAAAGGCAGTGCAGCTCAG	optiValidation2_guide_2158	451	0.0192514	22	0.0410923	2.13451	728
836	CGGGATCTCTGCAAGCCAGA	optiValidation2_guide_930	595	0.0253982	29	0.0541671	2.13271	729
3687	CGTGTATATACGCCGAGGAG	optiValidation2_guide_1331	431	0.0183977	21	0.0392245	2.13203	730
445	CAATTTATTTACCTGTCCAG	optiValidation2_guide_2241	534	0.0227944	26	0.0485636	2.13051	731
1498	CTGGCCCCCAAATTAATCCA	optiValidation2_guide_2252	781	0.0333378	38	0.0709776	2.12904	732
566	CTATCTTGCTCCACTTCCAA	optiValidation2_guide_2417	288	0.0122936	14	0.0261497	2.1271	733
2559	CAATGCCTTACCATGTTAGG	optiValidation2_guide_3486	556	0.0237335	27	0.0504315	2.12491	734
1099	ATTTATAAAATCAAAAAGAG	optiValidation2_guide_2759	103	0.00439667	5	0.00933916	2.12415	735
904	CATACTCGTTGAACGTTAAG	optiValidation2_guide_2793	537	0.0229224	26	0.0485636	2.11861	736
1726	TGGCAGAATTATTTGTAACA	optiValidation2_guide_2001	434	0.0185258	21	0.0392245	2.11729	737
4149	CCGGACTTCCACCTGACCCG	optiValidation2_guide_1562	621	0.0265081	30	0.056035	2.11388	738
4135	ACTGATAGATTAAAGTGCAG	optiValidation2_guide_1958	311	0.0132754	15	0.0280175	2.11048	739
602	CTGGACACTCTATCACCGGA	optiValidation2_guide_3726	622	0.0265508	30	0.056035	2.11048	740
2815	CATGTTAATACTGTACACGA	optiValidation2_guide_2821	332	0.0141718	16	0.0298853	2.10879	741
3493	CTGCGGATTTGACAATTGAG	optiValidation2_guide_1894	852	0.0363686	41	0.0765811	2.1057	742
2439	ACGCCGCTTATACCAAGACG	optiValidation2_guide_3903	603	0.0257397	29	0.0541671	2.10442	743
2265	AGAAAGTTTACGAAGACAAA	optiValidation2_guide_1397	605	0.0258251	29	0.0541671	2.09746	744
1016	CCGAAGGCAGTGAAGCTCAG	optiValidation2_guide_2630	668	0.0285143	32	0.0597706	2.09616	745
678	CCTATCAGATTACAGATCCG	optiValidation2_guide_86	501	0.0213857	24	0.044828	2.09616	746
2417	CTAGACATTACGTCGCCCCG	optiValidation2_guide_2178	543	0.0231786	26	0.0485636	2.0952	747
2865	GCGCGCTCCAAATAGCAACA	optiValidation2_guide_2494	585	0.0249714	28	0.0522993	2.09437	748
1427	AGGGGCGGCCTGTTATGCAG	optiValidation2_guide_3841	503	0.0214711	24	0.044828	2.08783	749
3585	TAACTCATCAAGCATCCCGA	optiValidation2_guide_3580	524	0.0223675	25	0.0466958	2.08766	750
1552	CCGAGCCGACACTAACACAA	optiValidation2_guide_2769	902	0.0385029	43	0.0803168	2.086	751
1339	CTATCAGCAGTCCATTTCCA	optiValidation2_guide_3824	441	0.0188246	21	0.0392245	2.08369	752
1237	CTTTTCTTAATAGCGTTAGA	optiValidation2_guide_2143	273	0.0116533	13	0.0242818	2.08369	753
3822	AAGGATAAAGCAGTAAACAA	optiValidation2_guide_2988	673	0.0287277	32	0.0597706	2.08059	754
3638	ACTACACTCTATCCGAACAG	optiValidation2_guide_3233	526	0.0224529	25	0.0466958	2.07972	755
3591	CGTTGTGGCAAATCTACCAA	optiValidation2_guide_1357	505	0.0215565	24	0.044828	2.07956	756
2588	CTACTTCCTCTTTAACCCGG	optiValidation2_guide_798	463	0.0197637	22	0.0410923	2.07918	757
2634	AATCCGGGCATAGCAAGGGG	optiValidation2_guide_47	905	0.0386309	43	0.0803168	2.07908	758
2335	AAGCCCAATCCTCAACCGAG	optiValidation2_guide_636	421	0.0179708	20	0.0373566	2.07874	759
2006	CGACGTACCACACAACCACA	optiValidation2_guide_1156	653	0.027874	31	0.0579028	2.0773	760
1611	CCTTCGGTAGGTGAAACAAG	optiValidation2_guide_1545	590	0.0251848	28	0.0522993	2.07662	761
833	CTGAGCAAACTCCAATCCAG	optiValidation2_guide_3333	654	0.0279167	31	0.0579028	2.07413	762
803	CGGGAATACTGATCACTGCG	optiValidation2_guide_1007	950	0.0405518	45	0.0840524	2.07272	763
1154	GGACCTGAAAGTAAAACCCA	optiValidation2_guide_2888	571	0.0243738	27	0.0504315	2.06909	764
3404	CATGTTTGCACGATGCAGGG	optiValidation2_guide_925	698	0.0297949	33	0.0616385	2.06876	765
3337	CGACTGTATTAACTGACAGG	optiValidation2_guide_1533	572	0.0244164	27	0.0504315	2.06547	766
3040	TAAGACCCTATTCTTAAAGG	optiValidation2_guide_3439	255	0.010885	12	0.022414	2.05917	767
4156	ACACATCGCCTAGTAATCGG	optiValidation2_guide_663	744	0.0317585	35	0.0653741	2.05848	768
227	CAATGACCTATTGCACCGGG	optiValidation2_guide_4138	852	0.0363686	40	0.0747133	2.05434	769
2959	ACGTCCACTTTTCAGTTAAA	optiValidation2_guide_2780	277	0.011824	13	0.0242818	2.0536	770
1089	TATTGACCACATGAACCCGG	optiValidation2_guide_249	341	0.014556	16	0.0298853	2.05313	771
3907	CTTTCGACCATCCTTACAGG	optiValidation2_guide_954	320	0.0136596	15	0.0280175	2.05113	772
1773	CTTAAATATTCGCTGCGGAA	optiValidation2_guide_339	491	0.0209589	23	0.0429601	2.04974	773
3855	CAGTAACCCCCGACATGAGG	optiValidation2_guide_1181	662	0.0282582	31	0.0579028	2.04906	774
2777	CTGAGTGTAATTTATTCCAG	optiValidation2_guide_4031	535	0.0228371	25	0.0466958	2.04474	775
1173	CTAGCCTTATCCTAGCCGAA	optiValidation2_guide_3342	343	0.0146413	16	0.0298853	2.04116	776
1119	ACTGATTACGGGCAACCAAA	optiValidation2_guide_915	193	0.00823842	9	0.0168105	2.0405	777
1281	CGGGCAGTCTGGGCGATAAA	optiValidation2_guide_1765	944	0.0402957	44	0.0821846	2.03954	778
1871	CTTGCCGGACCTTCACGGGG	optiValidation2_guide_1766	987	0.0421312	46	0.0859203	2.03935	779
1109	CGGCCTCAATAACAGAGGCG	optiValidation2_guide_2354	751	0.0320573	35	0.0653741	2.03929	780
1795	CAGTGCACTTCCGTTCCCCA	optiValidation2_guide_39	430	0.018355	20	0.0373566	2.03523	781
532	GCAGACCTTTAATCTTCAAG	optiValidation2_guide_2180	430	0.018355	20	0.0373566	2.03523	782
245	CGTGACCATCTTGATTCGCG	optiValidation2_guide_705	625	0.0266788	29	0.0541671	2.03034	783
1648	ATAGCCCTCACTAATAGGAG	optiValidation2_guide_2017	281	0.0119948	13	0.0242818	2.02436	784
3941	ACTTCTGGACATCCGAAACG	optiValidation2_guide_3619	433	0.0184831	20	0.0373566	2.02113	785
2944	CAGCGGTGATGATTAATGAA	optiValidation2_guide_395	1429	0.0609984	66	0.123277	2.02098	786
1079	CATGATCTATAGATTAAGCA	optiValidation2_guide_4106	498	0.0212577	23	0.0429601	2.02092	787
2377	CAATTGCCCATTGTTAGACA	optiValidation2_guide_1104	628	0.0268069	29	0.0541671	2.02064	788
953	TGAATTTCCTCGAATTCGCA	optiValidation2_guide_121	239	0.010202	11	0.0205462	2.01394	789
916	TCTGTTGTTTACTTACAGGG	optiValidation2_guide_2107	326	0.0139157	15	0.0280175	2.01338	790
2678	CTATTGGCTACTTCAATGAG	optiValidation2_guide_3498	522	0.0222821	24	0.044828	2.01183	791
1695	ATGTCAGGCGGTCCAAGCAA	optiValidation2_guide_903	609	0.0259958	28	0.0522993	2.01183	792
2538	ACTACACTCTATCCAACCAG	optiValidation2_guide_2265	501	0.0213857	23	0.0429601	2.00882	793
878	AGGTTCCCATTTAATAAGAA	optiValidation2_guide_3053	305	0.0130193	14	0.0261497	2.00854	794
3862	CCGCCGTCTATTACATTCAA	optiValidation2_guide_2407	940	0.0401249	43	0.0803168	2.00167	795
4166	CTGACCTAAGCAGTGTGCAG	optiValidation2_guide_4221	766	0.0326976	35	0.0653741	1.99936	796
567	AGGTTAATAGGATTGATGAG	optiValidation2_guide_641	394	0.0168183	18	0.033621	1.99907	797
744	ACTAGAGACTGTGTTCGAAA	optiValidation2_guide_2555	658	0.0280875	30	0.056035	1.99502	798
1760	TAGGGAATCCCTGTGCGAGA	optiValidation2_guide_3763	658	0.0280875	30	0.056035	1.99502	799
3325	CCAACAACTATCCTATTGCG	optiValidation2_guide_1746	483	0.0206174	22	0.0410923	1.99309	800
1868	ATGACCTTTTGGACATAAAA	optiValidation2_guide_1069	264	0.0112691	12	0.022414	1.98897	801
1252	CATTTCCATAAAGTTCTCAA	optiValidation2_guide_182	484	0.0206601	22	0.0410923	1.98897	802
3041	AGAATTTCCTCGAATTCGCA	optiValidation2_guide_2582	286	0.0122082	13	0.0242818	1.98897	803
1881	AATCGTCCTGCGCTATTAGA	optiValidation2_guide_3910	22	0.000939094	1	0.00186783	1.98897	804
3056	ACTGAGAATCTTCAGCCAGG	optiValidation2_guide_3810	814	0.0347465	37	0.0691098	1.98897	805
3037	CCACATACATAATTTCTAGA	optiValidation2_guide_444	771	0.032911	35	0.0653741	1.98639	806
215	AATGTCTAACATAAGTTGCA	optiValidation2_guide_2444	463	0.0197637	21	0.0392245	1.98468	807
2877	AAGTTAAAACCTACATGGAA	optiValidation2_guide_777	243	0.0103727	11	0.0205462	1.98079	808
1746	CTATTTTTTTAATATTAAGG	optiValidation2_guide_2306	199	0.00849453	9	0.0168105	1.97898	809
2084	CAGGTATTAGAACTATACAA	optiValidation2_guide_212	709	0.0302644	32	0.0597706	1.97495	810
2818	TCTAGGGCCATACCTATAAA	optiValidation2_guide_3425	421	0.0179708	19	0.0354888	1.9748	811
1217	TGATCTTCTTCCTATTTAAG	optiValidation2_guide_722	111	0.00473816	5	0.00933916	1.97105	812
1527	CATTCTACCCTTGCAAGAAA	optiValidation2_guide_1639	422	0.0180135	19	0.0354888	1.97012	813
225	TCTAAATCTTCGGTTCACCG	optiValidation2_guide_2844	200	0.00853722	9	0.0168105	1.96908	814
2591	CGAGCCTCCCATAAGTCACG	optiValidation2_guide_89	601	0.0256543	27	0.0504315	1.96581	815
37	CAACCACGTCCGTCACTCGG	optiValidation2_guide_2213	803	0.0342769	36	0.067242	1.96173	816
202	CGTATTATCTATCCGACCAA	optiValidation2_guide_1524	402	0.0171598	18	0.033621	1.95929	817
2013	CAAATGTTCCAGAATACGAG	optiValidation2_guide_1136	626	0.0267215	28	0.0522993	1.9572	818
982	AGGGGCGGCCAGTTATGCGG	optiValidation2_guide_3605	560	0.0239042	25	0.0466958	1.95345	819
2935	CAGCCGGGACCTCCTCAGCG	optiValidation2_guide_1901	1703	0.0726944	76	0.141955	1.95277	820
2760	GAACAATGAAGATAACCCGA	optiValidation2_guide_1890	650	0.027746	29	0.0541671	1.95225	821
2721	TAACAGGTCGGCGAATTCCA	optiValidation2_guide_881	852	0.0363686	38	0.0709776	1.95162	822
2796	CGGAAACAAGGGGAATTAAA	optiValidation2_guide_1987	1055	0.0450338	47	0.0877881	1.94938	823
1844	CAATTCCTTGTTCAAATCAA	optiValidation2_guide_2168	449	0.0191661	20	0.0373566	1.9491	824
2669	CTAGCCTTAACCTAGCCGAA	optiValidation2_guide_2	472	0.0201478	21	0.0392245	1.94683	825
1765	ACTCGAGACTGTGTACGAAA	optiValidation2_guide_2989	652	0.0278313	29	0.0541671	1.94626	826
1407	CTATATTAATAACCGCGCGA	optiValidation2_guide_2797	497	0.021215	22	0.0410923	1.93695	827
456	TTAGCCTTAACCTAGCCGAA	optiValidation2_guide_3708	226	0.00964706	10	0.0186783	1.93617	828
1754	CATGTTTATACTGTACGCGA	optiValidation2_guide_2773	362	0.0154524	16	0.0298853	1.93403	829
871	CCTCAAGCATTTATGAACGA	optiValidation2_guide_3336	545	0.0232639	24	0.044828	1.92693	830
3434	CATACTAGAGTAGATACGCG	optiValidation2_guide_3432	591	0.0252275	26	0.0485636	1.92503	831
925	CGAGCTCACCCAAAACCCGG	optiValidation2_guide_1252	614	0.0262093	27	0.0504315	1.92418	832
769	GGGCTATGCAGACTAACCGA	optiValidation2_guide_1715	387	0.0165195	17	0.0317531	1.92216	833
1291	CAGACCAGATTTACTCTGGG	optiValidation2_guide_1243	780	0.0332952	34	0.0635063	1.90737	834
3584	CCTATGACCGCTACACCGGA	optiValidation2_guide_2114	849	0.0362405	37	0.0691098	1.90698	835
1098	CAAGTTCGTTGTGTGCGAAA	optiValidation2_guide_3084	620	0.0264654	27	0.0504315	1.90556	836
675	CCTGCCAACACTATACGCCG	optiValidation2_guide_2651	667	0.0284716	29	0.0541671	1.9025	837
2370	CATCTTGATTGAGTGTCCGG	optiValidation2_guide_3061	415	0.0177147	18	0.033621	1.89791	838
2397	CAAGGGATACCAATGCCCAG	optiValidation2_guide_3158	946	0.0403811	41	0.0765811	1.89646	839
1499	CAGATATCCAGTTTACACCG	optiValidation2_guide_2274	623	0.0265934	27	0.0504315	1.89639	840
3174	CAGGGAGCCTGGTCGTTGCG	optiValidation2_guide_3540	785	0.0335086	34	0.0635063	1.89522	841
397	CATTAGACCGGTATTAGCAA	optiValidation2_guide_1075	694	0.0296242	30	0.056035	1.89153	842
2905	TCATGACTACCCGTAATGCA	optiValidation2_guide_967	486	0.0207454	21	0.0392245	1.89075	843
2535	CGTAGACACGACTCACAAGG	optiValidation2_guide_744	789	0.0336793	34	0.0635063	1.88562	844
1532	TTGCCCCTCGCCGTGTGACA	optiValidation2_guide_1829	465	0.019849	20	0.0373566	1.88204	845
2602	CATGGTGATATTACGAACAA	optiValidation2_guide_683	1002	0.0427715	43	0.0803168	1.87781	846
1861	CGTTAAAGTGTAATGCTACG	optiValidation2_guide_500	513	0.021898	22	0.0410923	1.87654	847
2709	CTGCCTTGCTACAAATGAAA	optiValidation2_guide_3174	560	0.0239042	24	0.044828	1.87532	848
1205	CAGCGACTTGATAATTCAGG	optiValidation2_guide_1679	911	0.038887	39	0.0728455	1.87326	849
129	GAGCACCCTGTACAAAACCA	optiValidation2_guide_3275	631	0.0269349	27	0.0504315	1.87234	850
2529	ATGAGGAACCGGATTCGAGG	optiValidation2_guide_1960	678	0.0289412	29	0.0541671	1.87163	851
2617	CGAGATGACACTGAGTGGCA	optiValidation2_guide_1980	795	0.0339354	34	0.0635063	1.87139	852
1160	CAGCTCGTTGGACAGCGAAA	optiValidation2_guide_1966	609	0.0259958	26	0.0485636	1.86813	853
1401	ACTCGAGACTGTGTTCAAAA	optiValidation2_guide_2071	492	0.0210016	21	0.0392245	1.86769	854
667	CTGTGCTGCGCAAATAAGCA	optiValidation2_guide_4088	328	0.014001	14	0.0261497	1.86769	855
2657	CATTACTGCCACCCTCAGAG	optiValidation2_guide_760	375	0.0160073	16	0.0298853	1.86698	856
3230	CCGGGTACTAGAGTAAGCAA	optiValidation2_guide_3183	891	0.0380333	38	0.0709776	1.8662	857
516	GCAACGTCTTATGAGAGCAG	optiValidation2_guide_2339	704	0.030051	30	0.056035	1.86466	858
3549	CCAAATACTACTTCACTAAG	optiValidation2_guide_1307	399	0.0170318	17	0.0317531	1.86435	859
1050	CGAAGAAATCACGTGAGAAG	optiValidation2_guide_3778	1033	0.0440947	44	0.0821846	1.86382	860
2406	CCTGCTGCTGGTCATATGGG	optiValidation2_guide_3159	587	0.0250567	25	0.0466958	1.8636	861
3815	CTGCGGTCTCCCAAACTGGA	optiValidation2_guide_2987	658	0.0280875	28	0.0522993	1.86202	862
799	CAGCCACGTGATATTATACA	optiValidation2_guide_1205	823	0.0351307	35	0.0653741	1.86089	863
893	TAACAGGGAAGGGCATCCAA	optiValidation2_guide_2235	824	0.0351733	35	0.0653741	1.85863	864
4098	TGATCCCCTCCCGATAGACA	optiValidation2_guide_186	354	0.0151109	15	0.0280175	1.85413	865
1733	CAGCGGTTATTTCCTCCCCG	optiValidation2_guide_1108	543	0.0231786	23	0.0429601	1.85344	866
491	CCACCTAGCTACGAGTCACA	optiValidation2_guide_3035	1466	0.0625778	62	0.115806	1.85059	867
2299	GGACCAGAAAGTGAAACCCA	optiValidation2_guide_3078	733	0.0312889	31	0.0579028	1.85059	868
2953	GAGAGCTCACCTTCTCCCAG	optiValidation2_guide_1348	544	0.0232212	23	0.0429601	1.85004	869
519	CAACTCCGATCCGCAATGCA	optiValidation2_guide_143	757	0.0323134	32	0.0597706	1.84972	870
2398	ATGGACCGTTTGCCTCTGCG	optiValidation2_guide_3981	592	0.0252702	25	0.0466958	1.84786	871
4164	ATGTCAGGCGGACCAAGCAA	optiValidation2_guide_3840	592	0.0252702	25	0.0466958	1.84786	872
446	CCGGGTATACCACAATAACA	optiValidation2_guide_2124	901	0.0384602	38	0.0709776	1.84548	873
2474	ACTTAGTCTTTCCTGTACGA	optiValidation2_guide_817	166	0.00708589	7	0.0130748	1.84519	874
1009	CGAGCTCCATTCGCGCTGCA	optiValidation2_guide_3772	475	0.0202759	20	0.0373566	1.84242	875
3458	CGTCGCAAACAACAGAAGGG	optiValidation2_guide_603	689	0.0294107	29	0.0541671	1.84175	876
3319	CCTAACCTCCTCACATCCGG	optiValidation2_guide_2970	643	0.0274472	27	0.0504315	1.8374	877
1378	CGAGACCTACTAATTTCAGA	optiValidation2_guide_1615	525	0.0224102	22	0.0410923	1.83364	878
1197	TTATTGTCTTTTTCTCAAGA	optiValidation2_guide_1795	191	0.00815305	8	0.0149427	1.83277	879
1497	GCAACTTGTTGTGCGCCCAG	optiValidation2_guide_3157	430	0.018355	18	0.033621	1.8317	880
3692	TGGGGCCCTCTATTGCCAAG	optiValidation2_guide_2183	430	0.018355	18	0.033621	1.8317	881
3254	CGGAGTGTAATTTATTCCAG	optiValidation2_guide_580	645	0.0275325	27	0.0504315	1.8317	882
2556	CTGTTTACCTAAACTTGGCA	optiValidation2_guide_506	239	0.010202	10	0.0186783	1.83085	883
3540	TAGCGACTCAGATTTTGACG	optiValidation2_guide_552	478	0.020404	20	0.0373566	1.83085	884
3450	CAATGACGTATTGCACTGGG	optiValidation2_guide_4121	622	0.0265508	26	0.0485636	1.82909	885
367	CGTTGCAAACCACTACTACG	optiValidation2_guide_174	479	0.0204466	20	0.0373566	1.82703	886
3164	CGGGCTCCATTAGCGCTGCA	optiValidation2_guide_2473	817	0.0348745	34	0.0635063	1.82099	887
316	CGATGGTCCCGGTTTTGAGG	optiValidation2_guide_3685	601	0.0256543	25	0.0466958	1.82019	888
4096	GGTGACATCTCCACTAACGG	optiValidation2_guide_144	409	0.0174586	17	0.0317531	1.81877	889
1151	TTGTTTTATAGAAATATCAA	optiValidation2_guide_1973	217	0.00926288	9	0.0168105	1.81482	890
3447	CAAGGGGCATAGACTACAAG	optiValidation2_guide_2974	1013	0.043241	42	0.078449	1.81423	891
1610	CTGTAGCACGAGGAGTACAA	optiValidation2_guide_2670	941	0.0401676	39	0.0728455	1.81354	892
4209	AATACAACACTTAAAACCGA	optiValidation2_guide_2135	531	0.0226663	22	0.0410923	1.81292	893
677	CTATCACCCGCGATGATCAA	optiValidation2_guide_597	773	0.0329964	32	0.0597706	1.81143	894
4147	GGTACCTCACCGCCTTTACG	optiValidation2_guide_713	266	0.0113545	11	0.0205462	1.80952	895
1228	CTGTACCTTGACAATATGCA	optiValidation2_guide_3365	387	0.0165195	16	0.0298853	1.80909	896
3410	TCGCCTCACTGCCATTCGCA	optiValidation2_guide_4114	218	0.00930557	9	0.0168105	1.8065	897
3987	CTAAAAAGCCTTGCGATGGG	optiValidation2_guide_1014	583	0.024886	24	0.044828	1.80133	898
3048	TGTACGGCATGACATTGGGG	optiValidation2_guide_1184	486	0.0207454	20	0.0373566	1.80072	899
239	AAACAAAGACGTTTGTAGGA	optiValidation2_guide_1375	535	0.0228371	22	0.0410923	1.79937	900
1803	GCTAGCCCCTACCAACCGCA	optiValidation2_guide_2775	463	0.0197637	19	0.0354888	1.79566	901
3394	CAAAACCACACTGCGCCCAG	optiValidation2_guide_985	805	0.0343623	33	0.0616385	1.79378	902
1948	ACTTTACCTAAATTGATGCA	optiValidation2_guide_3427	366	0.0156231	15	0.0280175	1.79334	903
41	GCACACATAGGCAAGTCACA	optiValidation2_guide_2375	366	0.0156231	15	0.0280175	1.79334	904
178	CAGGACGATCTATCATACGG	optiValidation2_guide_1180	879	0.0375211	36	0.067242	1.79211	905
3474	TGGTTGAAAGTGAAACAGGA	optiValidation2_guide_1618	635	0.0271057	26	0.0485636	1.79164	906
1602	TCGGTTGTAGTGATTTTAAA	optiValidation2_guide_2540	440	0.0187819	18	0.033621	1.79007	907
1232	CGTCTGAATGATTCTCGAAA	optiValidation2_guide_743	685	0.02924	28	0.0522993	1.78862	908
1337	CTAGGCAATGCTCTTCTACG	optiValidation2_guide_2033	588	0.0250994	24	0.044828	1.78602	909
4019	CCTGTTGCCGTCGCGTTACG	optiValidation2_guide_694	637	0.027191	26	0.0485636	1.78602	910
1303	ACTATCAGATTACAGATCCG	optiValidation2_guide_3394	417	0.0178001	17	0.0317531	1.78387	911
4068	GCTTGTCCATGAGTGATGAA	optiValidation2_guide_209	417	0.0178001	17	0.0317531	1.78387	912
3454	TAGGGCCCTGCGTTAATCGA	optiValidation2_guide_27	785	0.0335086	32	0.0597706	1.78374	913
1106	CGTGCATTTGCATTGTTCCA	optiValidation2_guide_3791	687	0.0293254	28	0.0522993	1.78342	914
2650	CTAAGCAAACTCCAGTCCAG	optiValidation2_guide_2164	639	0.0272764	26	0.0485636	1.78043	915
113	CATCCGTCATCGACTACAAG	optiValidation2_guide_3054	1008	0.0430276	41	0.0765811	1.77981	916
2592	GCTCTGCGATAAATAATAAG	optiValidation2_guide_2947	492	0.0210016	20	0.0373566	1.77876	917
4145	CCATGGATACCAATGCCCAG	optiValidation2_guide_2841	763	0.0325695	31	0.0579028	1.77782	918
4114	GAGGCCCAACCCTTACGCAG	optiValidation2_guide_2486	591	0.0252275	24	0.044828	1.77695	919
3399	CGGAGTGTATTTTATTCCAG	optiValidation2_guide_3818	715	0.0305206	29	0.0541671	1.77478	920
2897	CTGAATAAAGACTAAAGACA	optiValidation2_guide_1435	715	0.0305206	29	0.0541671	1.77478	921
923	GAGCCGCAATTCGCTCCGAA	optiValidation2_guide_3071	370	0.0157939	15	0.0280175	1.77395	922
2431	GAATGCAAAGCTACGACGAG	optiValidation2_guide_879	445	0.0189953	18	0.033621	1.76996	923
3569	CTAGTTTGTTGTGTGCGAAA	optiValidation2_guide_2539	470	0.0200625	19	0.0354888	1.76892	924
1367	CTATAACCCAGTCCGTTACG	optiValidation2_guide_3833	520	0.0221968	21	0.0392245	1.76713	925
2699	CAATTTATTCACATGTCCAG	optiValidation2_guide_2529	322	0.0137449	13	0.0242818	1.7666	926
589	CGTTTCTATGATTAATCCCG	optiValidation2_guide_2563	273	0.0116533	11	0.0205462	1.76312	927
1588	ACTTGCGAAGTACATTACCG	optiValidation2_guide_1150	422	0.0180135	17	0.0317531	1.76274	928
3678	ATACTGTGAGAGACACAGCA	optiValidation2_guide_1851	298	0.0127205	12	0.022414	1.76204	929
1672	CAATCGGGAGTTCCTAACAA	optiValidation2_guide_1381	920	0.0392712	37	0.0691098	1.75981	930
720	CCTACAAATCGGGCGAGACG	optiValidation2_guide_3520	698	0.0297949	28	0.0522993	1.75531	931
524	CATACTAGTTGAACGTTGAG	optiValidation2_guide_4231	499	0.0213004	20	0.0373566	1.7538	932
3645	TAGGGCCCTGCGGTAATCGA	optiValidation2_guide_3234	574	0.0245018	23	0.0429601	1.75334	933
2080	CTGAGGAGTTGCTTGAGACA	optiValidation2_guide_3891	674	0.0287704	27	0.0504315	1.75289	934
3353	CAGGTAACTTTTTCTCCCGA	optiValidation2_guide_1074	699	0.0298376	28	0.0522993	1.7528	935
856	TAACAGATCCCACTTTCAAG	optiValidation2_guide_2656	625	0.0266788	25	0.0466958	1.7503	936
1435	AAAGGGATCGTGCTGCACAA	optiValidation2_guide_3381	450	0.0192087	18	0.033621	1.7503	937
988	ATGTCCAGAGGATTAAGGAG	optiValidation2_guide_4061	426	0.0181843	17	0.0317531	1.74619	938
2696	CTTTACATCTACCAGTCAAG	optiValidation2_guide_4021	301	0.0128485	12	0.022414	1.74448	939
3823	CGGGCTACAGCTGCAAGACG	optiValidation2_guide_2628	853	0.0364112	34	0.0635063	1.74414	940
765	CGTTACAGAGCCTCTCCCAG	optiValidation2_guide_3059	502	0.0214284	20	0.0373566	1.74332	941
3929	CCAGCGTTCCAGAAGACCGG	optiValidation2_guide_4184	954	0.0407225	38	0.0709776	1.74296	942
3193	CCACATTGTGACTTTTAGCA	optiValidation2_guide_1025	452	0.0192941	18	0.033621	1.74255	943
4074	ACGTTAAAAATCGTAACGGA	optiValidation2_guide_1694	628	0.0268069	25	0.0466958	1.74193	944
3661	CCTCTTCCTAAAGCGCACAG	optiValidation2_guide_1070	377	0.0160927	15	0.0280175	1.74101	945
681	TCTAAGTTACCCGCTTCGGA	optiValidation2_guide_2652	352	0.0150255	14	0.0261497	1.74035	946
861	CCGCCTGTATCCCTAAGAAG	optiValidation2_guide_2199	982	0.0419177	39	0.0728455	1.73782	947
143	GCACCATATGGCTTTAGGAG	optiValidation2_guide_1261	831	0.0354721	33	0.0616385	1.73766	948
243	ATGGAAACACGCTTTAAGGA	optiValidation2_guide_837	529	0.0225809	21	0.0392245	1.73706	949
1636	GGGGGTCGCTTCACTCTACA	optiValidation2_guide_3871	378	0.0161353	15	0.0280175	1.7364	950
2434	TGGGGCCCTATATTGCCGAG	optiValidation2_guide_2678	454	0.0193795	18	0.033621	1.73487	951
2569	CAATGACAAAACGATCTCCG	optiValidation2_guide_2344	707	0.0301791	28	0.0522993	1.73297	952
4004	CAAGGCTTCGGTCTGCAGGA	optiValidation2_guide_858	506	0.0215992	20	0.0373566	1.72954	953
936	CAATACAATTTAGCTACAGA	optiValidation2_guide_2243	557	0.0237762	22	0.0410923	1.7283	954
1347	CCACTCCCCGTGTTTTACGG	optiValidation2_guide_111	659	0.0281301	26	0.0485636	1.72639	955
3365	CATTTCACTGTCAAGCCACA	optiValidation2_guide_311	507	0.0216419	20	0.0373566	1.72613	956
3921	CTGTACCGCTTGAAACGAAG	optiValidation2_guide_2154	634	0.027063	25	0.0466958	1.72545	957
792	CGGATCAGCTTACTAAGGAG	optiValidation2_guide_289	762	0.0325268	30	0.056035	1.72273	958
746	CAAGAGCCAGAAATGCTAGA	optiValidation2_guide_3804	661	0.0282155	26	0.0485636	1.72117	959
3332	CGGATCAGCTGACTAAGGAG	optiValidation2_guide_4209	661	0.0282155	26	0.0485636	1.72117	960
3057	CAATTCTGATGTCTAAGAGA	optiValidation2_guide_1009	534	0.0227944	21	0.0392245	1.7208	961
2342	AATGTCTAACCTAAGTTGCA	optiValidation2_guide_115	458	0.0195502	18	0.033621	1.71972	962
3883	TTTTCCACCGCGGAGTTAAA	optiValidation2_guide_619	255	0.010885	10	0.0186783	1.71598	963
1139	CATCTCGCCAGCCATCTCAA	optiValidation2_guide_3868	536	0.0228797	21	0.0392245	1.71438	964
3441	ATAAGCACTTCACAAATACG	optiValidation2_guide_542	460	0.0196356	18	0.033621	1.71225	965
2486	ACACCTCAAAACACGCCGAG	optiValidation2_guide_157	793	0.0338501	31	0.0579028	1.71057	966
45	CATAACACCAAGAAATTAAG	optiValidation2_guide_371	896	0.0382467	35	0.0653741	1.70927	967
2472	CAGTCCCACACTCCGTTCCG	optiValidation2_guide_781	717	0.0306059	28	0.0522993	1.7088	968
1641	CCGTCAGTCAGCTAGCGACA	optiValidation2_guide_1306	871	0.0371796	34	0.0635063	1.7081	969
42	CTAACAGACGTTACATCGAA	optiValidation2_guide_3579	871	0.0371796	34	0.0635063	1.7081	970
3036	CTAAGAAACAAACCATACAA	optiValidation2_guide_2812	1025	0.0437533	40	0.0747133	1.70761	971
436	TAGGATTGCAAGGCTCCCCA	optiValidation2_guide_1813	308	0.0131473	12	0.022414	1.70483	972
1619	TGGTTGCCCAAGCCGCACGA	optiValidation2_guide_3392	334	0.0142572	13	0.0242818	1.70313	973
922	GTAAAACGAGGGCTTCCAAG	optiValidation2_guide_1105	463	0.0197637	18	0.033621	1.70115	974
3111	AATCCGGGCATAGCAAGAGG	optiValidation2_guide_4068	670	0.0285997	26	0.0485636	1.69805	975
672	CAAGTGAGAGAACATTTCGA	optiValidation2_guide_3046	954	0.0407225	37	0.0691098	1.69709	976
186	CAGAAATTTCCATAACACGG	optiValidation2_guide_3444	748	0.0319292	29	0.0541671	1.69648	977
2052	CCATTAATATATATGTCACA	optiValidation2_guide_3932	284	0.0121229	11	0.0205462	1.69483	978
3990	CCGCGGCTCAACTCACTAAA	optiValidation2_guide_98	672	0.0286851	26	0.0485636	1.69299	979
3439	GGGTTCTACCACATGACAAA	optiValidation2_guide_3223	259	0.0110557	10	0.0186783	1.68947	980
3128	CTGACAGATGACGCACCAGA	optiValidation2_guide_1362	803	0.0342769	31	0.0579028	1.68926	981
3476	CGTACCTATAAACCTTTGAG	optiValidation2_guide_4124	311	0.0132754	12	0.022414	1.68839	982
3471	GTTCTACCCTCAATGAGAAA	optiValidation2_guide_1519	389	0.0166049	15	0.0280175	1.6873	983
1723	ACTAGTAGCGACCTATGCGG	optiValidation2_guide_3405	519	0.0221541	20	0.0373566	1.68622	984
3124	CGTTTAGTACATTAACGCCA	optiValidation2_guide_1811	364	0.0155377	14	0.0261497	1.68298	985
3634	CATACTCGTTAAACGTTGAG	optiValidation2_guide_2650	703	0.0300083	27	0.0504315	1.68058	986
1953	CATACAATTGCTCCTTGGCA	optiValidation2_guide_2463	573	0.0244591	22	0.0410923	1.68004	987
816	CTGACGAGTACTGAGTTACA	optiValidation2_guide_947	626	0.0267215	24	0.044828	1.6776	988
35	ACGATAGCAGCAGTGCCGAG	optiValidation2_guide_357	887	0.0378626	34	0.0635063	1.67728	989
3169	CCATCACATACCCTTACACG	optiValidation2_guide_2102	575	0.0245445	22	0.0410923	1.6742	990
4118	CATCTCTGATGACCGTTCAG	optiValidation2_guide_1919	576	0.0245872	22	0.0410923	1.67129	991
3637	ACAAGAGCCCAAGTGAACGG	optiValidation2_guide_1740	943	0.040253	36	0.067242	1.67048	992
2278	CAGGAGAGACGTTTGCCCAA	optiValidation2_guide_3617	1048	0.044735	40	0.0747133	1.67013	993
1587	TAAGGGGCCGCGGATAACAG	optiValidation2_guide_1674	972	0.0414909	37	0.0691098	1.66566	994
2294	CTGAGCAAACTCCAGTCAAG	optiValidation2_guide_2314	762	0.0325268	29	0.0541671	1.66531	995
3030	CAGAATCATGATCCAACCCA	optiValidation2_guide_1637	658	0.0280875	25	0.0466958	1.66251	996
2902	CCGGGCGAAGCCCAATACGA	optiValidation2_guide_670	316	0.0134888	12	0.022414	1.66167	997
3842	TTAACCTGAGTGTAGCCGAG	optiValidation2_guide_2724	316	0.0134888	12	0.022414	1.66167	998
3259	ACGCTTAAAGATTAATGCCA	optiValidation2_guide_2475	448	0.0191234	17	0.0317531	1.66044	999
1918	TCGCCTCACAACCATTCGCA	optiValidation2_guide_2913	422	0.0180135	16	0.0298853	1.65905	1000
4014	TATGGAAGCCCTGTGCGAGA	optiValidation2_guide_4227	343	0.0146413	13	0.0242818	1.65844	1001
319	CAAGGTCCCAGATTTATACA	optiValidation2_guide_3906	528	0.0225383	20	0.0373566	1.65748	1002
1593	TAGAGCTCTCTCTCGCTAAG	optiValidation2_guide_4143	423	0.0180562	16	0.0298853	1.65513	1003
13	CATATTCCACCTGCAATCCA	optiValidation2_guide_3648	397	0.0169464	15	0.0280175	1.6533	1004
133	CCGGAACCCATTCATCAAGG	optiValidation2_guide_2634	556	0.0237335	21	0.0392245	1.65271	1005
2973	GTGACGACAATGGTACGCAA	optiValidation2_guide_608	744	0.0317585	28	0.0522993	1.64678	1006
1114	AAAGGGCGAGCCCTAAAACA	optiValidation2_guide_2519	319	0.0136169	12	0.022414	1.64605	1007
3763	CCGTCGAAATTTACTCAACG	optiValidation2_guide_1841	559	0.0238615	21	0.0392245	1.64384	1008
2524	CGAACTACATCCTAACAGAG	optiValidation2_guide_3044	746	0.0318438	28	0.0522993	1.64237	1009
605	TCGATCGGCCACGCTCCCAG	optiValidation2_guide_2028	480	0.0204893	18	0.033621	1.6409	1010
4091	CAAGTGACAGAAATGCTAGA	optiValidation2_guide_4065	881	0.0376065	33	0.0616385	1.63904	1011
3526	CCAGTGAAAACACTTTTCAA	optiValidation2_guide_935	588	0.0250994	22	0.0410923	1.63718	1012
3304	CCGCGCAGATCGTAACCCCA	optiValidation2_guide_1983	1497	0.0639011	56	0.104599	1.63688	1013
1051	CCATTTGAAAGAACTAGGAA	optiValidation2_guide_2333	615	0.026252	23	0.0429601	1.63646	1014
1306	CCTGCCCTCCTCACATCCGG	optiValidation2_guide_2581	884	0.0377345	33	0.0616385	1.63348	1015
3927	CATTTCGGATCCCAAACCGG	optiValidation2_guide_1617	509	0.0217272	19	0.0354888	1.63338	1016
3313	GCTACTCGATTCCATACCCA	optiValidation2_guide_1632	268	0.0114399	10	0.0186783	1.63274	1017
3119	CCATTGCACCTCCCTCAGGG	optiValidation2_guide_3203	699	0.0298376	26	0.0485636	1.6276	1018
9	CTGCCCCTAATCGTGCAGGG	optiValidation2_guide_1877	565	0.0241176	21	0.0392245	1.62638	1019
3066	CCGTGCAATAGACCTATCGG	optiValidation2_guide_2106	1133	0.0483634	42	0.078449	1.62207	1020
466	ACAGGGGAAGGCAAGTTACA	optiValidation2_guide_2749	972	0.0414909	36	0.067242	1.62064	1021
311	GTTTCAGGATTTTTTTGAAA	optiValidation2_guide_2260	243	0.0103727	9	0.0168105	1.62064	1022
3385	CGGTTCGGCGCCCCAATCAA	optiValidation2_guide_4110	677	0.0288985	25	0.0466958	1.61586	1023
2773	CCAAGAACTCTCACTAGCCG	optiValidation2_guide_2531	650	0.027746	24	0.044828	1.61566	1024
1238	CTAGACATTACATCGACCCG	optiValidation2_guide_3367	787	0.033594	29	0.0541671	1.61241	1025
1185	ACGAAGGCAGTGCAGCTCAG	optiValidation2_guide_2508	1144	0.0488329	42	0.078449	1.60648	1026
1059	CTTTCACTCAATGAATTCAG	optiValidation2_guide_3780	437	0.0186538	16	0.0298853	1.6021	1027
4196	ACTAGTAGAGACCTTTGCGG	optiValidation2_guide_2535	519	0.0221541	19	0.0354888	1.60191	1028
3813	CGAGCCTCTGACGAAAAAGG	optiValidation2_guide_4168	930	0.0396981	34	0.0635063	1.59973	1029
3934	TCAACGGGAAGAGATCTAAG	optiValidation2_guide_1004	520	0.0221968	19	0.0354888	1.59883	1030
3955	TGTCTTTTCTCTCAATCCCG	optiValidation2_guide_1836	219	0.00934826	8	0.0149427	1.59844	1031
2356	CGGCGGAGCGGTCCACAGCG	optiValidation2_guide_1939	794	0.0338928	29	0.0541671	1.59819	1032
2656	TCGGTCTTACAGTTAATAGG	optiValidation2_guide_738	685	0.02924	25	0.0466958	1.59698	1033
3125	CAGACTCGTCATAAGATAAG	optiValidation2_guide_1602	658	0.0280875	24	0.044828	1.59601	1034
2560	CAGTGAAACTGCGCGTGACA	optiValidation2_guide_4011	631	0.0269349	23	0.0429601	1.59496	1035
468	CCACAGGAATCCACGTTCCG	optiValidation2_guide_1427	878	0.0374784	32	0.0597706	1.5948	1036
2967	CGGCCTTGCACCTCACAAGA	optiValidation2_guide_2706	439	0.0187392	16	0.0298853	1.5948	1037
1144	CAAGTGAAAGAACATTTCAA	optiValidation2_guide_2661	796	0.0339781	29	0.0541671	1.59418	1038
2029	GTGGTGTGTGGGACTCAGGG	optiValidation2_guide_1377	549	0.0234347	20	0.0373566	1.59408	1039
1930	CCGTACTGTTAATTAAGAAA	optiValidation2_guide_2062	522	0.0222821	19	0.0354888	1.5927	1040
4063	CTGAGCAAACTCCAGTCCAG	optiValidation2_guide_19	687	0.0293254	25	0.0466958	1.59234	1041
1037	CAATGAACTATTGCACTGGG	optiValidation2_guide_2659	742	0.0316731	27	0.0504315	1.59225	1042
72	CGACTACATACATTTACACG	optiValidation2_guide_2067	550	0.0234774	20	0.0373566	1.59118	1043
3223	CATATGTTCTTATTTCCGAA	optiValidation2_guide_923	716	0.0305632	26	0.0485636	1.58896	1044
787	CTAGCCTAAGCCGCATGCCA	optiValidation2_guide_2119	661	0.0282155	24	0.044828	1.58877	1045
354	ACTTCTGTACATCTGAAACG	optiValidation2_guide_3307	469	0.0200198	17	0.0317531	1.58609	1046
1627	CCGGCACCCATTCATCTAGG	optiValidation2_guide_3401	745	0.0318011	27	0.0504315	1.58584	1047
2703	CCACAAGAAAATAATCAACG	optiValidation2_guide_1950	773	0.0329964	28	0.0522993	1.585	1048
2300	AATCCGGGCATAGCAATGGG	optiValidation2_guide_2684	774	0.033039	28	0.0522993	1.58295	1049
1404	GCACATGACCGTCATTTGAG	optiValidation2_guide_2248	609	0.0259958	22	0.0410923	1.58073	1050
3648	ACAGGACATGGGAAAAGAGG	optiValidation2_guide_712	665	0.0283863	24	0.044828	1.57921	1051
3110	ACTGCATTTGCCCTTCACGG	optiValidation2_guide_3533	665	0.0283863	24	0.044828	1.57921	1052
1505	CTGCGGTCTCCCCAACTGGA	optiValidation2_guide_281	859	0.0366674	31	0.0579028	1.57914	1053
3134	CATAGTGAACTAGTTCACAA	optiValidation2_guide_2617	334	0.0142572	12	0.022414	1.57212	1054
1290	GCGTGCTTCGGGACATACGG	optiValidation2_guide_1700	668	0.0285143	24	0.044828	1.57212	1055
2297	TAGAGATAATTAGTTTGAAG	optiValidation2_guide_509	390	0.0166476	14	0.0261497	1.57078	1056
55	CGGTTCCCATTTAATAAGAA	optiValidation2_guide_668	587	0.0250567	21	0.0392245	1.56543	1057
3428	CCAGTGGCATCCCAGACACG	optiValidation2_guide_767	839	0.0358136	30	0.056035	1.56463	1058
3074	CCTAATCACTCCTTTTCGGG	optiValidation2_guide_4067	839	0.0358136	30	0.056035	1.56463	1059
2195	CGTCTAACCCCGGCTAAACA	optiValidation2_guide_3955	448	0.0191234	16	0.0298853	1.56276	1060
98	CGTCACTTACTGAAGTGGAA	optiValidation2_guide_1021	364	0.0155377	13	0.0242818	1.56276	1061
2775	CCAGACATTACGTCGACCCG	optiValidation2_guide_2954	869	0.0370942	31	0.0579028	1.56097	1062
3356	GTTTGGTAAGTTTATCAACG	optiValidation2_guide_3554	533	0.0227517	19	0.0354888	1.55983	1063
1809	ATAGGGCATAATTTACACGG	optiValidation2_guide_2516	505	0.0215565	18	0.033621	1.55967	1064
3750	GCACCCAAAGGCAAGTCACA	optiValidation2_guide_3095	618	0.02638	22	0.0410923	1.55771	1065
2216	CCATCCATAACACTGTCAGG	optiValidation2_guide_460	787	0.033594	28	0.0522993	1.55681	1066
1770	ACTCGCGTAAACATAAACAG	optiValidation2_guide_1609	422	0.0180135	15	0.0280175	1.55536	1067
3777	CAATCGGGAGTTACTAACAA	optiValidation2_guide_3599	844	0.0360271	30	0.056035	1.55536	1068
2568	CGATCCGTTACGGCTCTGAA	optiValidation2_guide_405	619	0.0264227	22	0.0410923	1.55519	1069
1163	AGGAGGTTCTATGATCACCA	optiValidation2_guide_382	507	0.0216419	18	0.033621	1.55352	1070
140	CCTGTTGTCATTATTCACCA	optiValidation2_guide_3539	507	0.0216419	18	0.033621	1.55352	1071
2746	CTGTTTTGATATAATCCGAG	optiValidation2_guide_727	479	0.0204466	17	0.0317531	1.55298	1072
1028	CAATACGGATACACTTAACA	optiValidation2_guide_1120	508	0.0216845	18	0.033621	1.55046	1073
3173	TCTTCTCCCATGACTTACAG	optiValidation2_guide_3206	226	0.00964706	8	0.0149427	1.54893	1074
4011	ACATAGAACGCTCTTCTCAA	optiValidation2_guide_4195	311	0.0132754	11	0.0205462	1.54769	1075
3396	CCAACAACAGTTCATTCGAA	optiValidation2_guide_3556	737	0.0314597	26	0.0485636	1.54368	1076
4082	TGGGGCCATCTATTGCCGAG	optiValidation2_guide_2839	539	0.0230078	19	0.0354888	1.54247	1077
2466	CTGTTCGGTCCCGTGTGACA	optiValidation2_guide_717	454	0.0193795	16	0.0298853	1.54211	1078
1968	AAACAGTCATGCTCTCAGGA	optiValidation2_guide_3164	597	0.0254836	21	0.0392245	1.5392	1079
3436	CTAGTAGGCTAGCCATCGAA	optiValidation2_guide_1539	570	0.0243311	20	0.0373566	1.53535	1080
478	CCTTAGGTCGTTCTTCACCA	optiValidation2_guide_2242	456	0.0194649	16	0.0298853	1.53535	1081
3232	CGGCCTCGATGACAGAGGCG	optiValidation2_guide_2715	656	0.0280021	23	0.0429601	1.53418	1082
1384	ACGCCGCTTCTACCAAGACG	optiValidation2_guide_60	571	0.0243738	20	0.0373566	1.53266	1083
517	TTTGGCGACAGCCTTCCCCG	optiValidation2_guide_222	143	0.00610411	5	0.00933916	1.52998	1084
324	CCTCCCTCAATCCCACCCAG	optiValidation2_guide_1968	687	0.0293254	24	0.044828	1.52864	1085
2956	CCATCAAAACCTTCGCTCGA	optiValidation2_guide_1918	859	0.0366674	30	0.056035	1.5282	1086
1642	ATTTGGGCTATATTGCACAG	optiValidation2_guide_38	315	0.0134461	11	0.0205462	1.52804	1087
3445	CTGGAACCACTACATTAAAG	optiValidation2_guide_2437	660	0.0281728	23	0.0429601	1.52488	1088
1638	CTGCCCCCCGGACTTAAAGG	optiValidation2_guide_1834	718	0.0306486	25	0.0466958	1.52359	1089
3307	GGAGACATAACGCAGTTAAA	optiValidation2_guide_1698	431	0.0183977	15	0.0280175	1.52288	1090
2903	CCATAGGCAGGGCTTCTGGA	optiValidation2_guide_4049	779	0.0332525	27	0.0504315	1.51662	1091
3491	ACACCCTTCTAATCTAGACA	optiValidation2_guide_1640	606	0.0258678	21	0.0392245	1.51635	1092
1148	CGTGACATCTCCACTAACGG	optiValidation2_guide_4153	636	0.0271484	22	0.0410923	1.51362	1093
1573	ACATAATACCCTTCTTGCGG	optiValidation2_guide_3390	376	0.01605	13	0.0242818	1.51289	1094
2132	GCTTGTCCATGAGTGATAAA	optiValidation2_guide_2141	348	0.0148548	12	0.022414	1.50888	1095
476	CATCCTCGTATACTGTGAGA	optiValidation2_guide_2741	784	0.0334659	27	0.0504315	1.50695	1096
730	CTAAAAGACGTTACATCAAA	optiValidation2_guide_2916	726	0.0309901	25	0.0466958	1.5068	1097
2676	ACGGAAAACTCCGCTTTAGG	optiValidation2_guide_361	639	0.0272764	22	0.0410923	1.50651	1098
3472	CGGGGCCCCCACCAATCAAA	optiValidation2_guide_4123	495	0.0211296	17	0.0317531	1.50278	1099
747	AGACTACCCTGAAATTCACA	optiValidation2_guide_387	233	0.00994586	8	0.0149427	1.5024	1100
961	CGGGGCCCCCACCATTCAAA	optiValidation2_guide_352	525	0.0224102	18	0.033621	1.50025	1101
115	GCACTTGTAAAGGCGTTAAA	optiValidation2_guide_2336	467	0.0199344	16	0.0298853	1.49918	1102
966	AGTCCGGGCATAGCAAGGGG	optiValidation2_guide_3842	613	0.0261666	21	0.0392245	1.49903	1103
2068	TTTACATCTGCGTCACAGGA	optiValidation2_guide_2790	292	0.0124643	10	0.0186783	1.49854	1104
75	CCGAATAACCGTCAAAACCG	optiValidation2_guide_90	818	0.0349172	28	0.0522993	1.49781	1105
2405	CTACCCAGCATAATTACCAA	optiValidation2_guide_2013	643	0.0274472	22	0.0410923	1.49714	1106
53	CGTGCGGGTGAACTGATAAA	optiValidation2_guide_791	1171	0.0499854	40	0.0747133	1.4947	1107
3349	AATCAAAACTAGGCGACACA	optiValidation2_guide_3092	527	0.0224956	18	0.033621	1.49456	1108
2407	CTTATATACCACACTCAAAG	optiValidation2_guide_2938	293	0.012507	10	0.0186783	1.49343	1109
238	AATTACACACCACAATTAAA	optiValidation2_guide_3284	557	0.0237762	19	0.0354888	1.49262	1110
3615	CTTCTGTACGCCTTATAACG	optiValidation2_guide_4142	264	0.0112691	9	0.0168105	1.49173	1111
142	CCAGGGATACCAATGCCCAG	optiValidation2_guide_303	1292	0.0551504	44	0.0821846	1.49019	1112
1856	GCTAGCACCTACCAAACGCA	optiValidation2_guide_2517	500	0.021343	17	0.0317531	1.48775	1113
2884	CTTTGGGAAATAAAGAAAAA	optiValidation2_guide_4048	412	0.0175867	14	0.0261497	1.4869	1114
4159	GGTCGACAATCTTTACACCA	optiValidation2_guide_1312	265	0.0113118	9	0.0168105	1.4861	1115
1684	CCGGCGACACAACCGATACA	optiValidation2_guide_400	1151	0.0491317	39	0.0728455	1.48266	1116
2804	TCGGCCATTATCGCGAGACA	optiValidation2_guide_3508	532	0.022709	18	0.033621	1.48051	1117
4213	CAATGACCTAATGCACTGGG	optiValidation2_guide_3279	739	0.031545	25	0.0466958	1.48029	1118
669	GAATAATTTACACAAACAGG	optiValidation2_guide_3045	355	0.0151536	12	0.022414	1.47912	1119
1156	AATACACTCTATCAGACCAG	optiValidation2_guide_3799	622	0.0265508	21	0.0392245	1.47734	1120
557	GCGTTGCAAGTTAATTTACG	optiValidation2_guide_3040	474	0.0202332	16	0.0298853	1.47704	1121
1227	CTGGCTCCTATACTAATAGA	optiValidation2_guide_3364	445	0.0189953	15	0.0280175	1.47497	1122
344	CTTGGTCAACGCCTTCAGAA	optiValidation2_guide_2086	475	0.0202759	16	0.0298853	1.47393	1123
1368	GCGCTTCACACTCCGACGAG	optiValidation2_guide_1885	595	0.0253982	20	0.0373566	1.47084	1124
749	TCTCCCAATAGGAATACGCA	optiValidation2_guide_1117	387	0.0165195	13	0.0242818	1.46989	1125
4015	ACTCGGGACTGTGTTCGAAA	optiValidation2_guide_2975	477	0.0203613	16	0.0298853	1.46775	1126
2319	ATACAGGTCAGAGAGCGCGG	optiValidation2_guide_1738	805	0.0343623	27	0.0504315	1.46764	1127
2806	TGAACAATTTGACAAATCAA	optiValidation2_guide_4116	507	0.0216419	17	0.0317531	1.46721	1128
3966	CGGCAGTCCATTTCTTTAGG	optiValidation2_guide_1486	537	0.0229224	18	0.033621	1.46673	1129
138	TTTGGCGACAGCCTTACCCG	optiValidation2_guide_3869	179	0.00764081	6	0.011207	1.46673	1130
2164	GCACTAGTAACGGCGTTAAA	optiValidation2_guide_2376	419	0.0178855	14	0.0261497	1.46206	1131
2032	TAGCCCTCCTCGCAGTAAGA	optiValidation2_guide_626	509	0.0217272	17	0.0317531	1.46145	1132
2767	GAATCAGATATCTAGTGAGA	optiValidation2_guide_530	749	0.0319719	25	0.0466958	1.46053	1133
2313	CTAACCTAAGCACTGTGCAG	optiValidation2_guide_3454	601	0.0256543	20	0.0373566	1.45615	1134
2009	CTACTACTTGTACCATGACA	optiValidation2_guide_809	541	0.0230932	18	0.033621	1.45588	1135
428	CTTAAAACATGTGCTACGAG	optiValidation2_guide_3583	662	0.0282582	22	0.0410923	1.45417	1136
2719	CGTGCCCGACTCTTTAAAGA	optiValidation2_guide_686	724	0.0309047	24	0.044828	1.45052	1137
1385	CAGGAGAGCCGATTGCCCAA	optiValidation2_guide_2899	695	0.0296668	23	0.0429601	1.44809	1138
623	GCATGTTTACTAATAACGGA	optiValidation2_guide_1008	575	0.0245445	19	0.0354888	1.4459	1139
3646	CCGAGAACTCTCACTAGCCG	optiValidation2_guide_336	818	0.0349172	27	0.0504315	1.44431	1140
1117	CTAAATGGTGGCATATTGCA	optiValidation2_guide_1911	607	0.0259105	20	0.0373566	1.44176	1141
1394	GGTTTGGACAGCAAGAGGCA	optiValidation2_guide_833	425	0.0181416	14	0.0261497	1.44142	1142
3899	AGATGCTAAGCCCTGTGAGA	optiValidation2_guide_2631	334	0.0142572	11	0.0205462	1.44111	1143
1287	AGTCCCTACTAAACGCAAGG	optiValidation2_guide_1445	334	0.0142572	11	0.0205462	1.44111	1144
444	TTTAGATAACCCTATATGAG	optiValidation2_guide_2185	243	0.0103727	8	0.0149427	1.44057	1145
3141	AATAAATATGTCACAACAGA	optiValidation2_guide_4071	547	0.0233493	18	0.033621	1.43991	1146
1054	GCAAAGGGAGAGTCTAAAAG	optiValidation2_guide_679	821	0.0350453	27	0.0504315	1.43904	1147
3226	ACGGAAGCAGGCGCATTCAG	optiValidation2_guide_4206	852	0.0363686	28	0.0522993	1.43804	1148
3573	GCAGCAAGACCTTTTTCACG	optiValidation2_guide_1556	761	0.0324841	25	0.0466958	1.4375	1149
167	GCACCCATAGGCAAGTAACA	optiValidation2_guide_3276	1127	0.0481072	37	0.0691098	1.43658	1150
3922	CCAGGAGGTCGGAAGCTCAA	optiValidation2_guide_1297	640	0.0273191	21	0.0392245	1.43579	1151
1613	CCATCTACAGCGTTGCCGGG	optiValidation2_guide_1667	823	0.0351307	27	0.0504315	1.43554	1152
3852	TGATCCCCTCCCGATAGCCA	optiValidation2_guide_2990	305	0.0130193	10	0.0186783	1.43467	1153
2100	TGGATAAACTCGGATTAAGA	optiValidation2_guide_3515	610	0.0260385	20	0.0373566	1.43467	1154
60	CTAGGCCCCTGCATGAAAAA	optiValidation2_guide_1874	702	0.0299656	23	0.0429601	1.43365	1155
2186	AAACACTCACCTGAAATGCA	optiValidation2_guide_659	489	0.0208735	16	0.0298853	1.43173	1156
1421	CGATGCTAAGCCCTGTGAGA	optiValidation2_guide_91	673	0.0287277	22	0.0410923	1.4304	1157
2963	CAGACCTACATTCTGTCGCG	optiValidation2_guide_2037	582	0.0248433	19	0.0354888	1.42851	1158
1447	CGAGCCTCTGTCAAAAAAGG	optiValidation2_guide_2668	707	0.0301791	23	0.0429601	1.42351	1159
2347	AATATTGATACCATATAGAG	optiValidation2_guide_3155	246	0.0105008	8	0.0149427	1.423	1160
3904	CCGTAGACCTGACTACTAAG	optiValidation2_guide_4179	800	0.0341489	26	0.0485636	1.42212	1161
2837	CAAAACGACTGAATAAACGG	optiValidation2_guide_2804	831	0.0354721	27	0.0504315	1.42172	1162
1409	GCACATGACCTTCATTCGAG	optiValidation2_guide_3101	585	0.0249714	19	0.0354888	1.42118	1163
1986	CGAGCCTCACATAAGTCACG	optiValidation2_guide_2818	616	0.0262946	20	0.0373566	1.42069	1164
1887	TAGGGAAGCCCTGTGCGAGA	optiValidation2_guide_1022	616	0.0262946	20	0.0373566	1.42069	1165
1841	CTAACAGGACAAAATCTCCG	optiValidation2_guide_653	986	0.0420885	32	0.0597706	1.42012	1166
2908	CATCCGTTATCGACTACCAG	optiValidation2_guide_2703	832	0.0355148	27	0.0504315	1.42001	1167
343	CTTACCATCCCGCATCCCGG	optiValidation2_guide_3293	339	0.0144706	11	0.0205462	1.41986	1168
2324	CAACGGGTCTCTACATACAA	optiValidation2_guide_3551	956	0.0408079	31	0.0579028	1.41891	1169
2253	GTACAACACCCGTTTCAAAG	optiValidation2_guide_1183	464	0.0198064	15	0.0280175	1.41457	1170
2644	AATGTGCGAGATATAACCCA	optiValidation2_guide_700	588	0.0250994	19	0.0354888	1.41393	1171
1090	CTAGGCACAAATTATATACG	optiValidation2_guide_1354	836	0.0356856	27	0.0504315	1.41322	1172
2812	CTTAAAAATCCCAAACAAGA	optiValidation2_guide_1625	373	0.0159219	12	0.022414	1.40774	1173
70	AAGCATAAATGTTATAGCGA	optiValidation2_guide_2411	623	0.0265934	20	0.0373566	1.40473	1174
201	CCGCCTGTATCCCTGAGAAG	optiValidation2_guide_145	1028	0.0438813	33	0.0616385	1.40466	1175
4045	GCACCGATAGGCAAGTCACA	optiValidation2_guide_4203	1340	0.0571994	43	0.0803168	1.40415	1176
1628	AATTAATCCTGGAAACTCAA	optiValidation2_guide_3226	312	0.0133181	10	0.0186783	1.40248	1177
2069	CCTTAAGTTTTGTCTCCCGG	optiValidation2_guide_1550	312	0.0133181	10	0.0186783	1.40248	1178
1010	CCACTGAGTTCACATCGACG	optiValidation2_guide_1144	1092	0.0466132	35	0.0653741	1.40248	1179
692	CCGTAACAAACCTCGCAAGG	optiValidation2_guide_2109	874	0.0373077	28	0.0522993	1.40184	1180
290	CCTAATCACTACTTTTCGAG	optiValidation2_guide_2558	562	0.0239896	18	0.033621	1.40148	1181
4010	CTGGCACAACTACATTAAAG	optiValidation2_guide_2250	627	0.0267642	20	0.0373566	1.39577	1182
1729	CATCTAAGAAACACGTTACA	optiValidation2_guide_2586	691	0.0294961	22	0.0410923	1.39314	1183
387	CTGATGATTACCCAGAGGAA	optiValidation2_guide_2859	597	0.0254836	19	0.0354888	1.39261	1184
2717	CCACACACCACAGCAATGAA	optiValidation2_guide_1186	1291	0.0551078	41	0.0765811	1.38966	1185
543	CAAAAAGACACCCCGCGCAG	optiValidation2_guide_3353	1134	0.048406	36	0.067242	1.38912	1186
1979	CCTAATCACTCCTTTTCCAG	optiValidation2_guide_3919	504	0.0215138	16	0.0298853	1.38912	1187
876	CGTCAGAATGATTCTCGAAA	optiValidation2_guide_3338	410	0.0175013	13	0.0242818	1.38743	1188
4205	CAATGACATATTGCACTGGG	optiValidation2_guide_2470	443	0.0189099	14	0.0261497	1.38285	1189
4200	CAGCTCTATTACCTTTTGGA	optiValidation2_guide_1902	538	0.0229651	17	0.0317531	1.38267	1190
1120	CTAACAGACGTTACATTAAA	optiValidation2_guide_2355	760	0.0324414	24	0.044828	1.38181	1191
1011	CCTGTGCCACTCTTGTTGGA	optiValidation2_guide_673	635	0.0271057	20	0.0373566	1.37819	1192
821	CATTGACCCTTACTATTCAA	optiValidation2_guide_3331	413	0.0176294	13	0.0242818	1.37735	1193
3284	CCTATGCCACTCTTGTTGGA	optiValidation2_guide_3815	572	0.0244164	18	0.033621	1.37698	1194
3548	CGATGTCCACTATAGCAACA	optiValidation2_guide_3467	350	0.0149401	11	0.0205462	1.37523	1195
180	CTGGAGAGCCGTTTGCCCAA	optiValidation2_guide_3669	669	0.028557	21	0.0392245	1.37355	1196
2960	CCTCAATAACAATTAAAAAG	optiValidation2_guide_728	510	0.0217699	16	0.0298853	1.37278	1197
726	TCATGGTTACTTGCTTAACA	optiValidation2_guide_645	255	0.010885	8	0.0149427	1.37278	1198
1869	AGGGGTGGCCAGTTATGCAG	optiValidation2_guide_3130	574	0.0245018	18	0.033621	1.37218	1199
3711	CCGCCGGAAATTACTAGAAG	optiValidation2_guide_443	1500	0.0640291	47	0.0877881	1.37106	1200
2552	CCGGGTCCTATAGTAAGCAA	optiValidation2_guide_3167	898	0.0383321	28	0.0522993	1.36437	1201
2387	CTATGAGTTTAGCTTCTGAA	optiValidation2_guide_2602	417	0.0178001	13	0.0242818	1.36414	1202
424	ACAGGACACGTTTTTATGAG	optiValidation2_guide_3299	802	0.0342343	25	0.0466958	1.36401	1203
3537	TATATTGATACAATATAGAG	optiValidation2_guide_2622	290	0.012379	9	0.0168105	1.35799	1204
1388	CTATTGACAGACTAATCCAA	optiValidation2_guide_2639	419	0.0178855	13	0.0242818	1.35763	1205
266	AAGCCTTCAAATTCTACCCA	optiValidation2_guide_1490	388	0.0165622	12	0.022414	1.35332	1206
3150	CATCTAGACAGACCTCCAAA	optiValidation2_guide_1109	776	0.0331244	24	0.044828	1.35332	1207
380	TCGGTTGTAGTGATTCAAAA	optiValidation2_guide_3693	356	0.0151963	11	0.0205462	1.35205	1208
431	ACATGATACCCTTCTTGCGG	optiValidation2_guide_807	259	0.0110557	8	0.0149427	1.35158	1209
3249	CCTACAATTGCTGCTTGGCA	optiValidation2_guide_4080	907	0.0387163	28	0.0522993	1.35083	1210
176	CTACTTAGCTTCGCGTCCAA	optiValidation2_guide_2236	195	0.00832379	6	0.011207	1.34638	1211
1756	CGTGCCTGAGACAAACCCAA	optiValidation2_guide_634	845	0.0360698	26	0.0485636	1.34638	1212
3971	TAAGAATCCCTCCTAATGAA	optiValidation2_guide_2996	260	0.0110984	8	0.0149427	1.34638	1213
3828	CGATCTCTCCCGGTATAACG	optiValidation2_guide_3639	749	0.0319719	23	0.0429601	1.34368	1214
1949	ATTGGTACTCCGGTATCACG	optiValidation2_guide_153	489	0.0208735	15	0.0280175	1.34225	1215
2025	GTGTATATCCTGATGCAGAA	optiValidation2_guide_1462	294	0.0125497	9	0.0168105	1.33951	1216
874	TTTCATGATAACACTTCGGG	optiValidation2_guide_3337	327	0.0139584	10	0.0186783	1.33815	1217
2415	CCGTGTCGTAAATAAAGCGG	optiValidation2_guide_298	883	0.0376918	27	0.0504315	1.33799	1218
263	ATTGTTTAAATTAAGTAACA	optiValidation2_guide_2152	295	0.0125924	9	0.0168105	1.33497	1219
3207	CCGTTCTTTAATGCTCGCAG	optiValidation2_guide_2936	295	0.0125924	9	0.0168105	1.33497	1220
3132	CTGATAGAACACACAACCCG	optiValidation2_guide_2450	624	0.0266361	19	0.0354888	1.33236	1221
3529	CGTTAGCGACGATAACTCGG	optiValidation2_guide_312	690	0.0294534	21	0.0392245	1.33175	1222
947	CTTCATAAACTTAAATCACA	optiValidation2_guide_2169	495	0.0211296	15	0.0280175	1.32598	1223
3827	GTGAGCGTACGCCAGACAAA	optiValidation2_guide_1262	396	0.0169037	12	0.022414	1.32598	1224
2275	CGGTACCATTCTACTATCCA	optiValidation2_guide_1712	364	0.0155377	11	0.0205462	1.32234	1225
1189	CTATACACATCGTCTATAGG	optiValidation2_guide_68	265	0.0113118	8	0.0149427	1.32098	1226
3486	CTTCCCGTTAGCTATTACAG	optiValidation2_guide_3138	332	0.0141718	10	0.0186783	1.31799	1227
3749	TGAAACCGTCCTGCGTCAAG	optiValidation2_guide_4158	332	0.0141718	10	0.0186783	1.31799	1228
3255	CCGCCGTCTATTACATTCGA	optiValidation2_guide_498	963	0.0411067	29	0.0541671	1.31772	1229
1293	TAGCCACCCAGGGATTCACA	optiValidation2_guide_1163	731	0.0312035	22	0.0410923	1.31691	1230
1702	TGGGGCCCCCTATTGCCGAG	optiValidation2_guide_3985	399	0.0170318	12	0.022414	1.31601	1231
3398	CGTGGTAAAAAACAGTCAAG	optiValidation2_guide_660	400	0.0170744	12	0.022414	1.31272	1232
2783	CATCTTAATTGAGTGACCGG	optiValidation2_guide_2401	701	0.029923	21	0.0392245	1.31085	1233
3240	GCACATGAACGTCATTCGAG	optiValidation2_guide_3047	769	0.0328256	23	0.0429601	1.30874	1234
2354	CTACAGACACGTGATTGGCG	optiValidation2_guide_2083	804	0.0343196	24	0.044828	1.30619	1235
171	CGGCCGACACCCGAGTCCCA	optiValidation2_guide_939	1075	0.0458876	32	0.0597706	1.30255	1236
2667	CTGGCACTACCACAATTAGA	optiValidation2_guide_2427	504	0.0215138	15	0.0280175	1.3023	1237
389	GAAATCCGAGATATTCGACG	optiValidation2_guide_956	404	0.0172452	12	0.022414	1.29972	1238
2138	TTGTACTATAGAAATATCAA	optiValidation2_guide_2595	202	0.00862259	6	0.011207	1.29972	1239
4072	CGTACTAATCTTACAAGGGA	optiValidation2_guide_2923	539	0.0230078	16	0.0298853	1.29892	1240
301	CGAACGTGATTTTTTCCCAG	optiValidation2_guide_1572	574	0.0245018	17	0.0317531	1.29595	1241
2010	TTGTTCTAAAGAAATATCAA	optiValidation2_guide_2976	169	0.00721395	5	0.00933916	1.2946	1242
3980	CAAATATGCACAACTATACA	optiValidation2_guide_2997	541	0.0230932	16	0.0298853	1.29412	1243
1798	GTGGTCCAAGCAACAAGGCA	optiValidation2_guide_1392	372	0.0158792	11	0.0205462	1.2939	1244
1417	CATACAATCACGGAGATAAA	optiValidation2_guide_3102	947	0.0404237	28	0.0522993	1.29378	1245
3147	CGGGCTCCAGCTGCTAGACG	optiValidation2_guide_3348	609	0.0259958	18	0.033621	1.29332	1246
4125	AGTAAAAACCTACCACACCA	optiValidation2_guide_2840	542	0.0231359	16	0.0298853	1.29173	1247
3075	CAACTTACCAGGTTAAAAGA	optiValidation2_guide_3491	813	0.0347038	24	0.044828	1.29173	1248
3081	CCTACCAGTGCACTGACAAA	optiValidation2_guide_3196	813	0.0347038	24	0.044828	1.29173	1249
3556	AAGGATAAAGCTGTTAACAA	optiValidation2_guide_3574	373	0.0159219	11	0.0205462	1.29043	1250
596	CGGCCTCGATAACAGAGGCG	optiValidation2_guide_103	916	0.0391005	27	0.0504315	1.28979	1251
1846	CCACTCCCCGTGTTTCACGG	optiValidation2_guide_3127	645	0.0275325	19	0.0354888	1.28898	1252
616	GCACCCATAGTCAAGTCACA	optiValidation2_guide_3317	883	0.0376918	26	0.0485636	1.28844	1253
1674	ACGCTTAGAGATTAATGCAA	optiValidation2_guide_2907	782	0.0333805	23	0.0429601	1.28698	1254
62	TAACGCACTAACTAACACCA	optiValidation2_guide_2410	476	0.0203186	14	0.0261497	1.28698	1255
1853	GCGTTGCAAGTTGATTTAAG	optiValidation2_guide_3908	749	0.0319719	22	0.0410923	1.28526	1256
2380	GAGCCGCGATTCGCTCCAAA	optiValidation2_guide_3110	613	0.0261666	18	0.033621	1.28488	1257
782	AAGTGCACCATGGTATACAG	optiValidation2_guide_1039	511	0.0218126	15	0.0280175	1.28446	1258
1041	CTAATACTTAGGAAGCCGAG	optiValidation2_guide_246	477	0.0203613	14	0.0261497	1.28428	1259
2872	CGGGATCTCAGCAAGCCAGA	optiValidation2_guide_3511	852	0.0363686	25	0.0466958	1.28396	1260
3233	CCGCTCTACTTCTCGCAAAG	optiValidation2_guide_943	853	0.0364112	25	0.0466958	1.28246	1261
3019	CTTGATACTTTCAAAAAAAG	optiValidation2_guide_3188	239	0.010202	7	0.0130748	1.2816	1262
3299	CGGGCTCCAAAACAGACCGA	optiValidation2_guide_1910	444	0.0189526	13	0.0242818	1.28118	1263
3504	CCATCAAGACGAGATAGCAA	optiValidation2_guide_3258	820	0.0350026	24	0.044828	1.2807	1264
1027	TTAGCGGATTCTCTATCGGG	optiValidation2_guide_1927	445	0.0189953	13	0.0242818	1.27831	1265
3917	GCGGCTTTACCCTTACGAAA	optiValidation2_guide_439	480	0.0204893	14	0.0261497	1.27626	1266
740	CTGAGGGGCGGGAAGCGGCA	optiValidation2_guide_250	858	0.0366247	25	0.0466958	1.27498	1267
3323	ACTTTACCTAAATTAATACA	optiValidation2_guide_2296	275	0.0117387	8	0.0149427	1.27294	1268
660	CTATCACACAGTCCGTTACG	optiValidation2_guide_3728	447	0.0190807	13	0.0242818	1.27259	1269
2312	TGGGGCACTCTATTGCCGAG	optiValidation2_guide_2714	551	0.02352	16	0.0298853	1.27063	1270
2808	CGTCGACCTAGCCATACAAA	optiValidation2_guide_1097	621	0.0265081	18	0.033621	1.26833	1271
3194	CGAGCCTCCCATAAGTCAAG	optiValidation2_guide_2713	518	0.0221114	15	0.0280175	1.26711	1272
1990	TGTACCCGTGCACCGCGGCA	optiValidation2_guide_442	726	0.0309901	21	0.0392245	1.26571	1273
2395	CCTTGAGCATTTATGAACGA	optiValidation2_guide_3462	623	0.0265934	18	0.033621	1.26426	1274
649	ACTCGATTTGATGTTTCACA	optiValidation2_guide_3607	485	0.0207028	14	0.0261497	1.2631	1275
2947	CTAGGCCAAGTTACTAAAAA	optiValidation2_guide_4056	693	0.0295815	20	0.0373566	1.26284	1276
2250	CATCATCCCGAGGCTTTCGG	optiValidation2_guide_986	416	0.0177574	12	0.022414	1.26223	1277
967	CTTCTGTTCAGATCACTGAG	optiValidation2_guide_1173	347	0.0148121	10	0.0186783	1.26102	1278
1884	CTAAGAAACGAACCATACAA	optiValidation2_guide_596	592	0.0252702	17	0.0317531	1.25655	1279
3606	CCAACAACAGTCCATTCGAA	optiValidation2_guide_561	767	0.0327402	22	0.0410923	1.2551	1280
1617	CGTACAACTGCCTATTACGA	optiValidation2_guide_1001	768	0.0327829	22	0.0410923	1.25347	1281
3135	CGTGGAATCCTTAAACCGAA	optiValidation2_guide_707	524	0.0223675	15	0.0280175	1.2526	1282
2593	CAATTGGGAGTTCCTAACAA	optiValidation2_guide_4008	629	0.0268496	18	0.033621	1.2522	1283
132	CATTATCACCTAATGTTCAG	optiValidation2_guide_1285	629	0.0268496	18	0.033621	1.2522	1284
794	CGATTCAACACCGATATAAA	optiValidation2_guide_972	664	0.0283436	19	0.0354888	1.25209	1285
3737	GATAGGTCTATCAAGTCGAG	optiValidation2_guide_1924	560	0.0239042	16	0.0298853	1.25021	1286
3401	CTGGTTAATAATCCATAGAA	optiValidation2_guide_969	350	0.0149401	10	0.0186783	1.25021	1287
153	ACTCTAATACTCGAGAGGCA	optiValidation2_guide_1168	596	0.0254409	17	0.0317531	1.24811	1288
1603	CGATGTCCACAATAGCAACA	optiValidation2_guide_2016	596	0.0254409	17	0.0317531	1.24811	1289
1134	ACATCTTGTCCGATATTCCG	optiValidation2_guide_1998	351	0.0149828	10	0.0186783	1.24665	1290
4204	GGTTCTAGTGAACCGAGAGG	optiValidation2_guide_432	281	0.0119948	8	0.0149427	1.24576	1291
813	GGACTATCAGCAAAGTTCAG	optiValidation2_guide_843	282	0.0120375	8	0.0149427	1.24134	1292
975	CCTACCTGTGCACAGACAAA	optiValidation2_guide_3769	529	0.0225809	15	0.0280175	1.24076	1293
2205	CTTATGTCCCTACAATTGGA	optiValidation2_guide_3296	529	0.0225809	15	0.0280175	1.24076	1294
2563	CTTGCACCAGAGCCGACAAA	optiValidation2_guide_1011	847	0.0361551	24	0.044828	1.23988	1295
4023	CGATGCTAAGCCCTGTTAGA	optiValidation2_guide_2730	424	0.0180989	12	0.022414	1.23842	1296
1737	TAGGTCTACCCTCAACGCGA	optiValidation2_guide_1245	354	0.0151109	10	0.0186783	1.23608	1297
1488	CAAGCCCCTTATGAGCAGAA	optiValidation2_guide_1494	638	0.0272337	18	0.033621	1.23453	1298
2698	CCAGGCCCCCGGTATACACA	optiValidation2_guide_2104	709	0.0302644	20	0.0373566	1.23434	1299
2336	CTTTGGATCAACGAACTGAA	optiValidation2_guide_1165	568	0.0242457	16	0.0298853	1.2326	1300
1904	GCTGGTCACATACATATCCA	optiValidation2_guide_775	355	0.0151536	10	0.0186783	1.2326	1301
56	GTAGTACCTAAATCTTGACA	optiValidation2_guide_1921	284	0.0121229	8	0.0149427	1.2326	1302
218	CCATGTATTCCACTTACAAG	optiValidation2_guide_2121	462	0.019721	13	0.0242818	1.23127	1303
464	TCAGGGTGCTCGTTGTCGGG	optiValidation2_guide_602	747	0.0318865	21	0.0392245	1.23013	1304
256	CTTGCTTGTCGCGTTTAAAA	optiValidation2_guide_175	249	0.0106288	7	0.0130748	1.23013	1305
2162	CGGGTGCGCTTCCATACCAA	optiValidation2_guide_1753	463	0.0197637	13	0.0242818	1.22861	1306
1057	CAAGGTATTGAGGCTAAAAG	optiValidation2_guide_536	784	0.0334659	22	0.0410923	1.22789	1307
919	CGTTCCCAACATCAGCAACA	optiValidation2_guide_1727	392	0.016733	11	0.0205462	1.22789	1308
684	GGATACCCAGGTAATCACCA	optiValidation2_guide_105	713	0.0304352	20	0.0373566	1.22742	1309
2315	CCAATGATCCTGTAACCGGA	optiValidation2_guide_1155	927	0.03957	26	0.0485636	1.22728	1310
2344	CTGAGCAAACTCAAGTCCAG	optiValidation2_guide_2423	607	0.0259105	17	0.0317531	1.2255	1311
2037	CCACATTCCATTTCTCGAAG	optiValidation2_guide_1078	715	0.0305206	20	0.0373566	1.22398	1312
2165	ACAGAAGCCTAGTATACCCA	optiValidation2_guide_757	680	0.0290265	19	0.0354888	1.22263	1313
754	CCGCGGCTTAACTCACTAAA	optiValidation2_guide_2186	716	0.0305632	20	0.0373566	1.22227	1314
2980	CTATAGCACTGTCCTACGAG	optiValidation2_guide_2175	358	0.0152816	10	0.0186783	1.22227	1315
779	CTTTACCATGTGTAGACGAG	optiValidation2_guide_1339	358	0.0152816	10	0.0186783	1.22227	1316
1078	TTAACCTGTGTGTAGCAGAG	optiValidation2_guide_3600	538	0.0229651	15	0.0280175	1.22	1317
2843	CAAGTATCAACATCGTGAAG	optiValidation2_guide_1460	646	0.0275752	18	0.033621	1.21925	1318
826	CTTATATACCACACTCAAAA	optiValidation2_guide_82	396	0.0169037	11	0.0205462	1.21548	1319
2736	CTTGGGCCACGTTTGTTCGA	optiValidation2_guide_35	649	0.0277033	18	0.033621	1.21361	1320
26	ACGTTGCAAAAGAAACACAA	optiValidation2_guide_801	505	0.0215565	14	0.0261497	1.21308	1321
369	GCTACACTCTATCCGACCAG	optiValidation2_guide_3295	433	0.0184831	12	0.022414	1.21268	1322
3580	CTTATTTATACCCCATTAGA	optiValidation2_guide_185	217	0.00926288	6	0.011207	1.20988	1323
653	CGAGCTGGCGAGCATTAGAA	optiValidation2_guide_2560	832	0.0355148	23	0.0429601	1.20964	1324
2790	AGAAAGCCCGGGTAAAGACG	optiValidation2_guide_1580	615	0.026252	17	0.0317531	1.20955	1325
3435	CATGATGAACGTGATCACAG	optiValidation2_guide_204	796	0.0339781	22	0.0410923	1.20938	1326
3765	TCTCTGCATGTACAGTTCAA	optiValidation2_guide_1030	362	0.0154524	10	0.0186783	1.20877	1327
1785	CTAGTACCCATAGCGACCAA	optiValidation2_guide_2043	471	0.0201052	13	0.0242818	1.20774	1328
2459	CCGACGTATAGAACTAGCAA	optiValidation2_guide_3051	979	0.0417897	27	0.0504315	1.20679	1329
1535	CTTAAATGCATTGAAAACCG	optiValidation2_guide_3089	838	0.035771	23	0.0429601	1.20098	1330
1716	CTAACGAGCTCTCTATGCGG	optiValidation2_guide_892	474	0.0202332	13	0.0242818	1.2001	1331
4018	ATTATTCCTTACCAGTAAAG	optiValidation2_guide_3628	146	0.00623217	4	0.00747133	1.19883	1332
96	CAGCCGATATCAAATTCAAG	optiValidation2_guide_1790	1387	0.0592056	38	0.0709776	1.19883	1333
2892	CAAGCCTCCCATAAGTCACG	optiValidation2_guide_2190	694	0.0296242	19	0.0354888	1.19797	1334
2907	CAGAAGGACATCCTTTACAG	optiValidation2_guide_2101	512	0.0218553	14	0.0261497	1.19649	1335
3003	CATTTAAATTTTAATAACCA	optiValidation2_guide_3522	512	0.0218553	14	0.0261497	1.19649	1336
2286	TTTTGTCACAAGGTACTCAG	optiValidation2_guide_2379	256	0.0109276	7	0.0130748	1.19649	1337
1676	GGTACCGAACCATATTCACG	optiValidation2_guide_1850	439	0.0187392	12	0.022414	1.1961	1338
173	CTAAAGTATTGTCCATGAGG	optiValidation2_guide_699	805	0.0343623	22	0.0410923	1.19585	1339
499	ACATAAGCATTGTTGTTCAA	optiValidation2_guide_687	476	0.0203186	13	0.0242818	1.19505	1340
1123	CCGAGCCGATAGCTGCCAGG	optiValidation2_guide_3466	989	0.0422166	27	0.0504315	1.19459	1341
1644	CTTGTTGATTATTTGCCCCA	optiValidation2_guide_254	403	0.0172025	11	0.0205462	1.19437	1342
4182	ACGCCGCTTCTACAAAGACG	optiValidation2_guide_2269	733	0.0312889	20	0.0373566	1.19393	1343
1608	CATTTAAATCTTAATAACCA	optiValidation2_guide_480	367	0.0156658	10	0.0186783	1.1923	1344
264	TAGAACAGAGCATAGTAACA	optiValidation2_guide_1458	661	0.0282155	18	0.033621	1.19158	1345
169	CGAACTACATCCTTACCGAG	optiValidation2_guide_3668	625	0.0266788	17	0.0317531	1.1902	1346
508	GGGGCCCAACCCTCACGCAG	optiValidation2_guide_3182	331	0.0141291	9	0.0168105	1.18978	1347
1021	TGTTGCTTCTACAAGCACCG	optiValidation2_guide_2147	258	0.011013	7	0.0130748	1.18722	1348
2444	CATATTCCTCCTGCAATCCA	optiValidation2_guide_1892	406	0.0173306	11	0.0205462	1.18554	1349
2101	CAACGGGATCGCTCGATCAG	optiValidation2_guide_661	1256	0.0536137	34	0.0635063	1.18452	1350
4093	CATACCCTAATACATCGCCG	optiValidation2_guide_1990	629	0.0268496	17	0.0317531	1.18263	1351
3542	CCAGATTGAAAAGAGCTACA	optiValidation2_guide_2405	666	0.0284289	18	0.033621	1.18263	1352
2514	CGAAGACTCCGACAATACAA	optiValidation2_guide_1692	740	0.0315877	20	0.0373566	1.18263	1353
3730	CGGTAAAGCCCCGTAACCCG	optiValidation2_guide_1984	703	0.0300083	19	0.0354888	1.18263	1354
2241	TCTCCAATTCTATATATCAA	optiValidation2_guide_1583	185	0.00789693	5	0.00933916	1.18263	1355
1730	TGGATGACTGGACCGCCAGG	optiValidation2_guide_1752	481	0.020532	13	0.0242818	1.18263	1356
1932	CATTAAAGAGCCCTATCACG	optiValidation2_guide_824	667	0.0284716	18	0.033621	1.18086	1357
1437	TTTCCATCTGCGTCACAGGA	optiValidation2_guide_338	408	0.0174159	11	0.0205462	1.17973	1358
3121	ATTACTTGATAACTGCAGCA	optiValidation2_guide_2090	223	0.009519	6	0.011207	1.17733	1359
2422	TGAAAAGACCATCTACAGAG	optiValidation2_guide_61	446	0.019038	12	0.022414	1.17733	1360
3326	CGGGCTCCAGCAGCAAGACG	optiValidation2_guide_4096	1041	0.0444362	28	0.0522993	1.17695	1361
6	CAACTTAACAGGTAAAAAGA	optiValidation2_guide_2523	856	0.0365393	23	0.0429601	1.17572	1362
1662	CAAGATATAAAAGTATTGAG	optiValidation2_guide_3170	708	0.0302218	19	0.0354888	1.17428	1363
2066	CTTTCACTCAATAAATCCAG	optiValidation2_guide_2227	336	0.0143425	9	0.0168105	1.17207	1364
3858	CGTTACCGAGCCTCTTCCAG	optiValidation2_guide_3240	635	0.0271057	17	0.0317531	1.17146	1365
2004	CGATGAATTGGGTCGCCGCA	optiValidation2_guide_1749	523	0.0223248	14	0.0261497	1.17133	1366
4036	CTGCCCTCTGCAATGAAAAG	optiValidation2_guide_3630	822	0.035088	22	0.0410923	1.17112	1367
3432	GAACTCGCCTAACAACCGAA	optiValidation2_guide_4117	299	0.0127631	8	0.0149427	1.17077	1368
1162	ATGCTGTCATCGCAGCCCAA	optiValidation2_guide_1677	524	0.0223675	14	0.0261497	1.16909	1369
1970	TCGCCTCACTACCATTTGCA	optiValidation2_guide_2299	412	0.0175867	11	0.0205462	1.16828	1370
2842	CGTAGCCACCACGATATACG	optiValidation2_guide_914	600	0.0256117	16	0.0298853	1.16686	1371
3696	CCGGTTCAAGCATCAAAAAG	optiValidation2_guide_540	525	0.0224102	14	0.0261497	1.16686	1372
3482	CCGACTGTATCCCTGAGAAG	optiValidation2_guide_2998	863	0.0368381	23	0.0429601	1.16619	1373
3607	ACTTACCATAATAAAAGCAG	optiValidation2_guide_1659	526	0.0224529	14	0.0261497	1.16465	1374
3084	ATTAGGGCCAGTCTGACCGG	optiValidation2_guide_993	188	0.00802499	5	0.00933916	1.16376	1375
1110	CAAATCGGCCCGAAGACCCA	optiValidation2_guide_1464	715	0.0305206	19	0.0354888	1.16278	1376
1206	CCAATTACTAGTTTGAAGAA	optiValidation2_guide_2057	753	0.0321426	20	0.0373566	1.16221	1377
121	GCATATACCCCTATTTCAAA	optiValidation2_guide_286	415	0.0177147	11	0.0205462	1.15983	1378
2862	CTAGCCACAGTCTAAAGACA	optiValidation2_guide_3787	605	0.0258251	16	0.0298853	1.15722	1379
2123	ACTACACTCTATCTGACCAG	optiValidation2_guide_2894	530	0.0226236	14	0.0261497	1.15586	1380
3279	CCAAACACTTGACATCCACG	optiValidation2_guide_110	910	0.0388444	24	0.044828	1.15404	1381
3498	AGTGTCGCACCACTACCGAG	optiValidation2_guide_4131	493	0.0210442	13	0.0242818	1.15385	1382
3679	GGATGTATCCGAATTTCAAG	optiValidation2_guide_3255	418	0.0178428	11	0.0205462	1.15151	1383
1854	ACATTTAACGAATATTGACG	optiValidation2_guide_1439	380	0.0162207	10	0.0186783	1.15151	1384
2913	CAGGGAAAATGCGCGTGACA	optiValidation2_guide_2704	1143	0.0487902	30	0.056035	1.14849	1385
3100	AGTGTCGCACCACAACCCAG	optiValidation2_guide_3951	724	0.0309047	19	0.0354888	1.14833	1386
3478	GGATGGTAACCTGAATTAAA	optiValidation2_guide_3563	572	0.0244164	15	0.0280175	1.14748	1387
43	TGATTGACACCTTAGTAAAG	optiValidation2_guide_349	229	0.00977512	6	0.011207	1.14648	1388
1204	CGGGCTCAAGCTGCAAGACG	optiValidation2_guide_2577	802	0.0342343	21	0.0392245	1.14577	1389
3707	CAAATATGCTCAACTATACA	optiValidation2_guide_138	535	0.0228371	14	0.0261497	1.14505	1390
1956	CTAGGAGATATAATGATAAA	optiValidation2_guide_374	688	0.029368	18	0.033621	1.14482	1391
3023	AATTTTTTCGCTGAACCACA	optiValidation2_guide_4059	153	0.00653097	4	0.00747133	1.14398	1392
1903	CATTCGCATAGCAATTTCGG	optiValidation2_guide_2093	537	0.0229224	14	0.0261497	1.14079	1393
1124	CCTCCTGGAAACTAGTAACA	optiValidation2_guide_2115	499	0.0213004	13	0.0242818	1.13997	1394
952	CCGGGTTGTACGAAGCCCCG	optiValidation2_guide_168	576	0.0245872	15	0.0280175	1.13952	1395
3680	GAAGACCTTTGATCTTCAAG	optiValidation2_guide_2624	192	0.00819573	5	0.00933916	1.13952	1396
2393	CAATCGTGTCAAACGTTCCA	optiValidation2_guide_1611	653	0.027874	17	0.0317531	1.13917	1397
2828	CCAGGTTGAAACGAGCTACA	optiValidation2_guide_2955	769	0.0328256	20	0.0373566	1.13803	1398
791	CTTGCCATCCAGCATCCCGG	optiValidation2_guide_2653	462	0.019721	12	0.022414	1.13656	1399
1984	GCGCGACGTAATCTGACCAG	optiValidation2_guide_2783	462	0.019721	12	0.022414	1.13656	1400
54	AAACCGGGCATAGCAAGGGG	optiValidation2_guide_3009	1040	0.0443935	27	0.0504315	1.13601	1401
1656	GGGCTGAACTGATCAACCAG	optiValidation2_guide_3984	541	0.0230932	14	0.0261497	1.13235	1402
3140	CGTGCATTCGCATTGTTCCA	optiValidation2_guide_487	387	0.0165195	10	0.0186783	1.13068	1403
393	CTGCTCCTTGTTGAAACAAA	optiValidation2_guide_3695	426	0.0181843	11	0.0205462	1.12989	1404
2201	CTAGCACTAGGGTATATCAG	optiValidation2_guide_529	814	0.0347465	21	0.0392245	1.12888	1405
3910	GCACTTGGATTGCTAACAGG	optiValidation2_guide_49	698	0.0297949	18	0.033621	1.12841	1406
3589	CGAGACAATTTAGCTACAGA	optiValidation2_guide_3581	931	0.0397408	24	0.044828	1.12801	1407
3062	AAAATCCGAGATATTCGACG	optiValidation2_guide_3192	272	0.0116106	7	0.0130748	1.12611	1408
1301	GGATGTCTTCGAATTTCAAG	optiValidation2_guide_2580	272	0.0116106	7	0.0130748	1.12611	1409
1847	CTTGTAATTGCCTAAACCGA	optiValidation2_guide_1207	350	0.0149401	9	0.0168105	1.12519	1410
3331	CAGGGAAACTGCGCGTAACA	optiValidation2_guide_3553	973	0.0415336	25	0.0466958	1.12429	1411
2303	GCGGTTTGCAAATTGTGAGG	optiValidation2_guide_658	701	0.029923	18	0.033621	1.12358	1412
2734	CATGCGACCCCTGATACGCG	optiValidation2_guide_257	780	0.0332952	20	0.0373566	1.12198	1413
2677	TCAGGGAAAAAGTTGTTAAA	optiValidation2_guide_1175	585	0.0249714	15	0.0280175	1.12198	1414
595	CAATGTTTTGTCACACCAGG	optiValidation2_guide_1226	820	0.0350026	21	0.0392245	1.12062	1415
3248	CCTACAATTGCCCCTTGGCA	optiValidation2_guide_4013	703	0.0300083	18	0.033621	1.12039	1416
3071	ATTCGAGGTCCTTAGACCCA	optiValidation2_guide_556	430	0.018355	11	0.0205462	1.11938	1417
1107	CATGCTGATCTATCGCTGCA	optiValidation2_guide_1223	744	0.0317585	19	0.0354888	1.11746	1418
2182	CAACCAATTCGAAAGATCCA	optiValidation2_guide_3952	941	0.0401676	24	0.044828	1.11602	1419
359	CAGATAGCCCCTTTGACAGG	optiValidation2_guide_2162	706	0.0301364	18	0.033621	1.11563	1420
231	CTAGCGTTAACCTAGCCGAA	optiValidation2_guide_3651	786	0.0335513	20	0.0373566	1.11342	1421
1466	CAGGAGAGCCGTGTGCCCAA	optiValidation2_guide_3845	906	0.0386736	23	0.0429601	1.11084	1422
3137	ATAACCTGTGTGTAGCCGAG	optiValidation2_guide_2794	394	0.0168183	10	0.0186783	1.11059	1423
725	CATAAATTACTGATTACAGG	optiValidation2_guide_1642	749	0.0319719	19	0.0354888	1.11	1424
3835	CGTATCAACTAAAAACTACG	optiValidation2_guide_2194	513	0.021898	13	0.0242818	1.10886	1425
4190	CCGAGAACTCTCACTAGACG	optiValidation2_guide_3248	829	0.0353868	21	0.0392245	1.10845	1426
2915	CCGCGGCTCGACTCACTAAA	optiValidation2_guide_3181	711	0.0303498	18	0.033621	1.10778	1427
629	TAAGACCCTATTCTTCAAGG	optiValidation2_guide_521	395	0.016861	10	0.0186783	1.10778	1428
2259	CAAACCTGCTATGCGTGCCA	optiValidation2_guide_2394	712	0.0303925	18	0.033621	1.10623	1429
1700	CCAGATTTATGACCTCGGAG	optiValidation2_guide_314	356	0.0151963	9	0.0168105	1.10623	1430
235	CAGCGACGTTTTAAGCAGAA	optiValidation2_guide_979	872	0.0372223	22	0.0410923	1.10397	1431
3167	ACTATCCCCACCCCTCCACG	optiValidation2_guide_614	238	0.0101593	6	0.011207	1.10313	1432
2067	TATTCAAATATACTTCAGCA	optiValidation2_guide_2920	238	0.0101593	6	0.011207	1.10313	1433
2839	CATAGTGAACTTGTTCACAA	optiValidation2_guide_2613	834	0.0356002	21	0.0392245	1.1018	1434
2116	CCAATCGGAAGATAAATCCA	optiValidation2_guide_355	874	0.0373077	22	0.0410923	1.10144	1435
1993	GATGCAACACGTAATTCGGG	optiValidation2_guide_1585	596	0.0254409	15	0.0280175	1.10128	1436
2756	CATGTAGTATATGTTATGGG	optiValidation2_guide_1265	995	0.0424727	25	0.0466958	1.09943	1437
3984	TTATTGAATAGGAAAACCAA	optiValidation2_guide_4193	438	0.0186965	11	0.0205462	1.09893	1438
1855	CCTCATAAATACAAACCACG	optiValidation2_guide_3128	598	0.0255263	15	0.0280175	1.09759	1439
3460	AAAAATAGTAAGCAGACGGG	optiValidation2_guide_1936	319	0.0136169	8	0.0149427	1.09736	1440
2682	TTTTGTCACGAGGTACTCGG	optiValidation2_guide_3499	319	0.0136169	8	0.0149427	1.09736	1441
3082	ACTCCTTGTATCTTTAAACG	optiValidation2_guide_949	359	0.0153243	9	0.0168105	1.09698	1442
577	CAATCTATTTCACAAATACG	optiValidation2_guide_2685	439	0.0187392	11	0.0205462	1.09643	1443
3096	ACATATCCCAACCCGTACAA	optiValidation2_guide_1777	400	0.0170744	10	0.0186783	1.09393	1444
1646	CCTATACCTTAGGCTCAGCA	optiValidation2_guide_429	360	0.015367	9	0.0168105	1.09393	1445
3198	AAGCACACTTTGCCGCCCCA	optiValidation2_guide_814	521	0.0222395	13	0.0242818	1.09183	1446
361	AAATCTACCAAGGAAATACA	optiValidation2_guide_421	401	0.0171171	10	0.0186783	1.09121	1447
4150	GGTTACATCTCCACTAACGG	optiValidation2_guide_2181	361	0.0154097	9	0.0168105	1.0909	1448
2975	CGAGCCTCCCATAAGTCCCG	optiValidation2_guide_2707	562	0.0239896	14	0.0261497	1.09004	1449
4107	ACATATTTAGCATAGAAGAA	optiValidation2_guide_1236	402	0.0171598	10	0.0186783	1.08849	1450
1296	CCTCAGGTCGTTCTTCGCCA	optiValidation2_guide_2735	766	0.0326976	19	0.0354888	1.08537	1451
1556	CCACACATTCCCGAGTCCAA	optiValidation2_guide_1200	605	0.0258251	15	0.0280175	1.08489	1452
2763	CCATCAGTCCCGTCGATAAA	optiValidation2_guide_155	565	0.0241176	14	0.0261497	1.08425	1453
2119	CTGATGTATTTGAAGCTCAG	optiValidation2_guide_3438	444	0.0189526	11	0.0205462	1.08408	1454
1506	CTAAGACACTAAGTGACACA	optiValidation2_guide_503	647	0.0276179	16	0.0298853	1.0821	1455
2825	GCTGCGACTTCGCAAACCCA	optiValidation2_guide_33	445	0.0189953	11	0.0205462	1.08164	1456
2821	CCTCACGCTTCCATAAGAGG	optiValidation2_guide_4036	486	0.0207454	12	0.022414	1.08043	1457
776	CCTACTTGCGGAAAATTGCG	optiValidation2_guide_1407	810	0.0345757	20	0.0373566	1.08043	1458
4140	AAGGCTACTGATCTACCAAA	optiValidation2_guide_2205	488	0.0208308	12	0.022414	1.076	1459
3408	CTATGGGAAATAAAGCAAAA	optiValidation2_guide_4125	895	0.0382041	22	0.0410923	1.0756	1460
3620	CTACATACACAACTTTCCAG	optiValidation2_guide_3929	735	0.0313743	18	0.033621	1.07161	1461
2222	TGTCGTTGAGACATATGGCA	optiValidation2_guide_242	572	0.0244164	14	0.0261497	1.07099	1462
1212	CATCCCCCAATTCTGCCCAA	optiValidation2_guide_1434	899	0.0383748	22	0.0410923	1.07081	1463
3658	ACTACACTCTATCCTACCAG	optiValidation2_guide_2831	287	0.0122509	7	0.0130748	1.06725	1464
3438	GATGAGGACCTATCGACAGG	optiValidation2_guide_4118	574	0.0245018	14	0.0261497	1.06725	1465
429	TTTCATGATAACACTTTGGG	optiValidation2_guide_235	246	0.0105008	6	0.011207	1.06725	1466
2346	CAATCCGTTACGGCTCTGAA	optiValidation2_guide_3154	862	0.0367954	21	0.0392245	1.06602	1467
2108	TTACCAGATTACGATTTAGG	optiValidation2_guide_1825	411	0.017544	10	0.0186783	1.06466	1468
4100	ACAGGACATTGGAAAAGAGG	optiValidation2_guide_3470	782	0.0333805	19	0.0354888	1.06316	1469
3220	CCACACCACATGACAATCCA	optiValidation2_guide_1036	1075	0.0458876	26	0.0485636	1.05832	1470
591	CCTCAAGATCTCTTGATCAA	optiValidation2_guide_1138	663	0.0283009	16	0.0298853	1.05599	1471
1493	ACTTCCTTTCCTAAGCAGCA	optiValidation2_guide_1149	83	0.00354295	2	0.00373566	1.05439	1472
2660	CAAACCTGCTCTGCGCGCCA	optiValidation2_guide_3494	457	0.0195075	11	0.0205462	1.05324	1473
409	CTACGTGATTCGCCATTAAA	optiValidation2_guide_1258	416	0.0177574	10	0.0186783	1.05186	1474
1782	CTTTGGCCACGTTTGTTCGA	optiValidation2_guide_2911	500	0.021343	12	0.022414	1.05018	1475
4078	CGATGCTAAGCCATGTGAGA	optiValidation2_guide_2552	625	0.0266788	15	0.0280175	1.05018	1476
4087	CTGGTCACCTGGGCTCGGGA	optiValidation2_guide_2477	919	0.0392285	22	0.0410923	1.04751	1477
1927	CTGTCCAGAGGATTAAGGAG	optiValidation2_guide_860	627	0.0267642	15	0.0280175	1.04683	1478
2334	CCTGTACCAGAGAAATGCGA	optiValidation2_guide_1472	836	0.0356856	20	0.0373566	1.04683	1479
3923	GGATCCTGAGTCCTTATCGG	optiValidation2_guide_1793	377	0.0160927	9	0.0168105	1.04461	1480
2358	CATCCTCGTATCATGTGAGA	optiValidation2_guide_3974	671	0.0286424	16	0.0298853	1.0434	1481
1508	CAGACTCGTTATAAGATAAG	optiValidation2_guide_3112	839	0.0358136	20	0.0373566	1.04308	1482
1319	CATTGCCTAGTATTGCGACA	optiValidation2_guide_3822	630	0.0268922	15	0.0280175	1.04184	1483
488	CTTTTAAATAGCTTTCCCGG	optiValidation2_guide_711	126	0.00537845	3	0.0056035	1.04184	1484
607	GCAAAACTCGGTATGTCGCA	optiValidation2_guide_398	800	0.0341489	19	0.0354888	1.03924	1485
1131	AAAACACACTGGTAACGCGG	optiValidation2_guide_417	718	0.0306486	17	0.0317531	1.03604	1486
1916	CTTGTTTACGAGATGAAAAA	optiValidation2_guide_1782	507	0.0216419	12	0.022414	1.03568	1487
945	AGGGTCTAATGATTACTCCA	optiValidation2_guide_1129	466	0.0198917	11	0.0205462	1.0329	1488
189	ACTTGGGACGATGTAAAACA	optiValidation2_guide_3671	892	0.038076	21	0.0392245	1.03016	1489
535	CATCCGATCTTTAAATTAAG	optiValidation2_guide_2865	1062	0.0453326	25	0.0466958	1.03007	1490
903	CCTGACCTCCTCACATCCGG	optiValidation2_guide_106	680	0.0290265	16	0.0298853	1.02959	1491
1739	CGTACCTATATACCTTTAAG	optiValidation2_guide_3408	340	0.0145133	8	0.0149427	1.02959	1492
4062	CTAGTGTGATGTCCTATGCA	optiValidation2_guide_297	510	0.0217699	12	0.022414	1.02959	1493
683	CATTAGTTTTGGGCGTTCAG	optiValidation2_guide_2745	511	0.0218126	12	0.022414	1.02757	1494
3920	CGAAGTGACCGGTCTAAAGG	optiValidation2_guide_3615	639	0.0272764	15	0.0280175	1.02717	1495
2663	AGTATATTCTCGTCTACCGA	optiValidation2_guide_4017	213	0.00909214	5	0.00933916	1.02717	1496
3816	TCTTGGGCCATACATATAAA	optiValidation2_guide_3239	426	0.0181843	10	0.0186783	1.02717	1497
1827	CCATCCGGATTCCTATAGGA	optiValidation2_guide_1733	767	0.0327402	18	0.033621	1.0269	1498
1030	CATCCGACATCGACTACCAG	optiValidation2_guide_3351	1025	0.0437533	24	0.044828	1.02456	1499
2823	ACTACGCTCTATCCGACCAG	optiValidation2_guide_3249	471	0.0201052	11	0.0205462	1.02193	1500
3160	CTTCAGAGCCACACATTCCA	optiValidation2_guide_2965	258	0.011013	6	0.011207	1.01761	1501
2055	CGATAGAGCGATGAATGCCG	optiValidation2_guide_958	517	0.0220687	12	0.022414	1.01565	1502
827	GCTACACCTATTTTTTAACA	optiValidation2_guide_795	388	0.0165622	9	0.0168105	1.01499	1503
368	CGGACTGATACTGCGCCCGG	optiValidation2_guide_1862	690	0.0294534	16	0.0298853	1.01466	1504
1837	CAGCATCAACCGATATAGCG	optiValidation2_guide_1137	949	0.0405091	22	0.0410923	1.0144	1505
2403	CTGATGATTACACCGAGGAA	optiValidation2_guide_2363	604	0.0257824	14	0.0261497	1.01424	1506
1806	CAAATACCTGGCCAGCAGCA	optiValidation2_guide_2674	734	0.0313316	17	0.0317531	1.01345	1507
4041	TAGCAACTCCCGCTGAAAAA	optiValidation2_guide_1099	648	0.0276606	15	0.0280175	1.0129	1508
1000	CGTTAGATCTTGGCGCCGGG	optiValidation2_guide_3080	606	0.0258678	14	0.0261497	1.0109	1509
2156	CGTATCGCCATCTAGTACCG	optiValidation2_guide_333	433	0.0184831	10	0.0186783	1.01056	1510
5	AAACAGGTAACCTAGCAGAA	optiValidation2_guide_3263	1042	0.0444789	24	0.044828	1.00785	1511
706	CCTCTCGCAAGCCATCTCAA	optiValidation2_guide_3535	565	0.0241176	13	0.0242818	1.00681	1512
2844	CAACCAATTTGTAAGATCCA	optiValidation2_guide_4040	913	0.0389724	21	0.0392245	1.00647	1513
2609	TAAAGACTATAACCACCCAG	optiValidation2_guide_2202	522	0.0222821	12	0.022414	1.00592	1514
877	GAGGCTACTGATCTACCAAA	optiValidation2_guide_12	654	0.0279167	15	0.0280175	1.00361	1515
713	AGGGACAGCTCCGAATCAGG	optiValidation2_guide_1619	349	0.0148974	8	0.0149427	1.00303	1516
3257	GAATCTACTATGCAGTTGGG	optiValidation2_guide_2088	262	0.0111838	6	0.011207	1.00208	1517
2282	TTAGTGCATATGTATTGACA	optiValidation2_guide_3148	350	0.0149401	8	0.0149427	1.00017	1518
1873	CAAGTCACAAACTCTTTCAA	optiValidation2_guide_1728	482	0.0205747	11	0.0205462	0.998613	1519
1865	CCTCAGGTCGTTCTTCACCA	optiValidation2_guide_96	658	0.0280875	15	0.0280175	0.997509	1520
2210	CAAGTCACACCTGTGATGCA	optiValidation2_guide_1537	615	0.026252	14	0.0261497	0.996103	1521
3657	CGGTCCAGAAGGCCACCCAG	optiValidation2_guide_918	660	0.0281728	15	0.0280175	0.994486	1522
2708	AGTATATTATCGTCTACGGA	optiValidation2_guide_2482	308	0.0131473	7	0.0130748	0.994486	1523
3015	CTGTACCTCGACAATATGCA	optiValidation2_guide_1295	573	0.0244591	13	0.0242818	0.99275	1524
3675	CAACCATATCCGGTGCAGAA	optiValidation2_guide_1102	794	0.0338928	18	0.033621	0.991981	1525
1963	CGAAATCTCCCGGTATAACG	optiValidation2_guide_3134	353	0.0150682	8	0.0149427	0.991669	1526
2841	CGAGACAGCAGCATACTAAA	optiValidation2_guide_2805	927	0.03957	21	0.0392245	0.991268	1527
2976	CATCACGGTGCACCAAGGAG	optiValidation2_guide_785	972	0.0414909	22	0.0410923	0.990394	1528
986	GAGTTTCGCAACTAGAGAGA	optiValidation2_guide_1043	221	0.00943363	5	0.00933916	0.989986	1529
1751	CGACTTTTTCTGTAATAAAG	optiValidation2_guide_401	487	0.0207881	11	0.0205462	0.98836	1530
3906	GAAAAGTTCCCCTAACCCCA	optiValidation2_guide_919	310	0.0132327	7	0.0130748	0.98807	1531
1137	TAGGGCCCTTCGTTAATCGA	optiValidation2_guide_2574	310	0.0132327	7	0.0130748	0.98807	1532
2658	CAAGCTGGCCAAATATCACG	optiValidation2_guide_1670	842	0.0359417	19	0.0354888	0.987399	1533
3916	CGGCCTCGATAGCAGAGGCG	optiValidation2_guide_4182	799	0.0341062	18	0.033621	0.985773	1534
425	ATAGGCCAAGTCCTTCTGGG	optiValidation2_guide_3166	400	0.0170744	9	0.0168105	0.984541	1535
275	CATCCGATCTTAAAATTCAG	optiValidation2_guide_3024	623	0.0265934	14	0.0261497	0.983312	1536
3051	CGAAAAGGACCTCAATCCAA	optiValidation2_guide_4064	668	0.0285143	15	0.0280175	0.982576	1537
2252	CAACATCCTGCCTTGTCGCG	optiValidation2_guide_3966	490	0.0209162	11	0.0205462	0.982309	1538
662	CGATGCATCACAACTTCCCA	optiValidation2_guide_1196	401	0.0171171	9	0.0168105	0.982086	1539
3369	GGACCGCTAACCATGCCCCA	optiValidation2_guide_4103	536	0.0228797	12	0.022414	0.979643	1540
1428	CCTCGTAGATGTTCGTTCCG	optiValidation2_guide_1436	670	0.0285997	15	0.0280175	0.979643	1541
2053	AAACATAAAACCAAATCCGA	optiValidation2_guide_2789	269	0.0114826	6	0.011207	0.976001	1542
1164	CAAGGGTGACCGCATCGGGA	optiValidation2_guide_917	1256	0.0536137	28	0.0522993	0.975483	1543
935	CGAAACACATTCATGTAACG	optiValidation2_guide_568	763	0.0325695	17	0.0317531	0.974935	1544
723	AGACTCATTCAACAGCTCCG	optiValidation2_guide_675	404	0.0172452	9	0.0168105	0.974793	1545
3805	CATATGTTACTGACATGAGG	optiValidation2_guide_547	405	0.0172879	9	0.0168105	0.972386	1546
2256	ACTTGGGACGATGTAAGACA	optiValidation2_guide_1403	721	0.0307767	16	0.0298853	0.971038	1547
3795	CTAGTAAGACTAGATCCAAA	optiValidation2_guide_1897	496	0.0211723	11	0.0205462	0.970426	1548
1569	GTACCGGACAATCAAAACCA	optiValidation2_guide_1267	679	0.0289839	15	0.0280175	0.966658	1549
679	CTGTGCCATCGTTAGTGCAA	optiValidation2_guide_1818	634	0.027063	14	0.0261497	0.966251	1550
99	CATGATCTATAGATTACGCA	optiValidation2_guide_977	861	0.0367527	19	0.0354888	0.96561	1551
1333	TAACAGATACCACTTTCCAG	optiValidation2_guide_2387	544	0.0232212	12	0.022414	0.965236	1552
2102	CGAAGACTCTTCTAAAACAG	optiValidation2_guide_438	408	0.0174159	9	0.0168105	0.965236	1553
3860	CAATGGCATACCATGTTAGG	optiValidation2_guide_3241	1043	0.0445216	23	0.0429601	0.964928	1554
458	CAGGAGAGCCGTTTGCCCAA	optiValidation2_guide_200	1271	0.054254	28	0.0522993	0.963971	1555
1093	TTTCCTATCCCCACTCTCAG	optiValidation2_guide_3354	91	0.00388444	2	0.00373566	0.961701	1556
2659	CAAACTCTCCCGGTATAACG	optiValidation2_guide_2399	685	0.02924	15	0.0280175	0.958191	1557
2738	GGTTAGATCTTGGCGCTGGG	optiValidation2_guide_3710	411	0.017544	9	0.0168105	0.958191	1558
2197	CTGTAACTCGATGCAATACA	optiValidation2_guide_108	870	0.0371369	19	0.0354888	0.955621	1559
496	ATGGTTCCCTCTACACTCCA	optiValidation2_guide_1976	229	0.00977512	5	0.00933916	0.955401	1560
3395	AAAACCTTTGAGACGTTCGA	optiValidation2_guide_271	275	0.0117387	6	0.011207	0.954707	1561
3701	CGGGGCCCCCACCATTTAAA	optiValidation2_guide_2323	871	0.0371796	19	0.0354888	0.954524	1562
198	CCAACATTAGACCTGACAAG	optiValidation2_guide_1859	688	0.029368	15	0.0280175	0.954013	1563
3854	CTGCTTCCCCGACCGTTCCG	optiValidation2_guide_1508	597	0.0254836	13	0.0242818	0.952841	1564
493	ACAAGGCAAATTTAAACAAA	optiValidation2_guide_67	735	0.0313743	16	0.0298853	0.952542	1565
2289	CGTTCGAGCTATCTTTACCG	optiValidation2_guide_1432	506	0.0215992	11	0.0205462	0.951248	1566
184	AGGAACGGAAATCCTCTGAA	optiValidation2_guide_1940	414	0.017672	9	0.0168105	0.951248	1567
217	AAACAGGTACCCTAGAAGAA	optiValidation2_guide_3019	644	0.0274898	14	0.0261497	0.951248	1568
4092	CATCTACACCAGTTTCCACA	optiValidation2_guide_1135	507	0.0216419	11	0.0205462	0.949371	1569
188	CGTTCTCAATGCTTGCCGGA	optiValidation2_guide_1543	508	0.0216845	11	0.0205462	0.947502	1570
1312	TATGACCCCTCATTGATGAG	optiValidation2_guide_1483	231	0.00986049	5	0.00933916	0.94713	1571
1225	TAAGACCCTATTCTTTAAGG	optiValidation2_guide_2305	417	0.0178001	9	0.0168105	0.944404	1572
2904	GTAAATCTCATGGCACCACG	optiValidation2_guide_1133	139	0.00593337	3	0.0056035	0.944404	1573
2670	CAATGGCCTATTGCACTGGG	optiValidation2_guide_3171	649	0.0277033	14	0.0261497	0.943919	1574
534	AGGCATTTAGCAATTTAACA	optiValidation2_guide_1898	371	0.0158365	8	0.0149427	0.943556	1575
322	CGTAACAGCAGCATACTAAA	optiValidation2_guide_2514	928	0.0396127	20	0.0373566	0.943047	1576
309	GGGTTCTACCACTTGACAAG	optiValidation2_guide_2855	325	0.013873	7	0.0130748	0.942467	1577
38	CAACCCTGCTCTGCGTGCCA	optiValidation2_guide_3267	743	0.0317158	16	0.0298853	0.942286	1578
10	ATTGCCAATACGGCGAGAAA	optiValidation2_guide_1792	418	0.0178428	9	0.0168105	0.942145	1579
294	CATACCAGTGCACAGACAAA	optiValidation2_guide_3680	744	0.0317585	16	0.0298853	0.941019	1580
2199	CAATTGACCCACTAGCAGGA	optiValidation2_guide_3956	791	0.0337647	17	0.0317531	0.940424	1581
1440	GCAGATTCTTCTACAAGACA	optiValidation2_guide_1687	373	0.0159219	8	0.0149427	0.938496	1582
2364	CTTGATAGAACAATGAAGGG	optiValidation2_guide_1720	513	0.021898	11	0.0205462	0.938268	1583
913	CATACAAATAAATTATGAAA	optiValidation2_guide_3968	700	0.0298803	15	0.0280175	0.937658	1584
858	CTAAGACGTAATTAACTACA	optiValidation2_guide_1666	467	0.0199344	10	0.0186783	0.936989	1585
3138	CATCCGTGTTACATACCGAA	optiValidation2_guide_3492	1121	0.0478511	24	0.044828	0.936822	1586
3846	TAGAGCTCTCTCTCACTAAG	optiValidation2_guide_474	422	0.0180135	9	0.0168105	0.933214	1587
111	AAAGCGTGACTCCCACGAGA	optiValidation2_guide_1650	516	0.022026	11	0.0205462	0.932813	1588
2492	CAGGCACCAAAAACAAACCA	optiValidation2_guide_22	893	0.0381187	19	0.0354888	0.931008	1589
128	TGGGGCCCTCTATTGCCGAG	optiValidation2_guide_44	376	0.01605	8	0.0149427	0.931008	1590
2428	CATTATGACATTGTTACAGA	optiValidation2_guide_1614	611	0.0260812	13	0.0242818	0.931008	1591
758	CTGGGACCACTACATTAAAG	optiValidation2_guide_3748	425	0.0181416	9	0.0168105	0.926627	1592
192	TAGTGATCTCTCATTCCGAG	optiValidation2_guide_1281	521	0.0222395	11	0.0205462	0.92386	1593
1551	TCTGAGTTACCCGCTTCGGA	optiValidation2_guide_593	521	0.0222395	11	0.0205462	0.92386	1594
1893	TGGACCTTTGTGTATTCGAA	optiValidation2_guide_3418	379	0.016178	8	0.0149427	0.923639	1595
4002	CCGCCTTTAAGCTTGCAAAA	optiValidation2_guide_907	474	0.0202332	10	0.0186783	0.923152	1596
3946	TCTAGCTACGCTACATTCCA	optiValidation2_guide_1899	95	0.00405518	2	0.00373566	0.921208	1597
2894	CAAATTACTGACCAACGCAA	optiValidation2_guide_3250	618	0.02638	13	0.0242818	0.920463	1598
1129	CATAGCAGCATATCTCTGGG	optiValidation2_guide_1224	524	0.0223675	11	0.0205462	0.918571	1599
328	GGTTCATGTGCCCTACGGAA	optiValidation2_guide_2081	429	0.0183123	9	0.0168105	0.917987	1600
1282	CTGCCCCGTACGGCTATCAG	optiValidation2_guide_139	764	0.0326122	16	0.0298853	0.916385	1601
3312	GCTTTGGTCCCCACTAACCG	optiValidation2_guide_1046	191	0.00815305	4	0.00747133	0.916385	1602
2231	ACTCCTCTCGGTACAAGAAA	optiValidation2_guide_780	430	0.018355	9	0.0168105	0.915852	1603
1150	CATGCAAGTGACCAGACGGG	optiValidation2_guide_1204	861	0.0367527	18	0.033621	0.914789	1604
694	CTTATGTGCAACAAAAAAAG	optiValidation2_guide_3741	622	0.0265508	13	0.0242818	0.914543	1605
486	GGACAAACACCTGTTTACCG	optiValidation2_guide_3303	431	0.0183977	9	0.0168105	0.913727	1606
797	CAATCTCGTTATTAACCCCA	optiValidation2_guide_3062	528	0.0225383	11	0.0205462	0.911612	1607
4170	CCGCAACGATCATAGTCGAA	optiValidation2_guide_1741	1058	0.0451619	22	0.0410923	0.909889	1608
1215	ACATAACACCTACTGTAGGG	optiValidation2_guide_1656	579	0.0247153	12	0.022414	0.906889	1609
839	CTGTGTGCTAGGGCTTTAAA	optiValidation2_guide_2748	724	0.0309047	15	0.0280175	0.906576	1610
277	CTGATGTAATTGAAGCCCAG	optiValidation2_guide_3953	531	0.0226663	11	0.0205462	0.906462	1611
2441	AATCCGGCCATAGCAAGGGG	optiValidation2_guide_3629	725	0.0309474	15	0.0280175	0.905325	1612
2898	CGGTCTCCAGCTGCAAGACG	optiValidation2_guide_2702	725	0.0309474	15	0.0280175	0.905325	1613
2679	CCTGCTACTGGTCATATGGG	optiValidation2_guide_2266	629	0.0268496	13	0.0242818	0.904366	1614
2971	CCAAAACACATTTTATCCCG	optiValidation2_guide_1971	581	0.0248006	12	0.022414	0.903767	1615
580	ATGAACCGCTTGGAAACGAG	optiValidation2_guide_1415	678	0.0289412	14	0.0261497	0.903545	1616
2979	CCATCTAATTCGCCTCGACA	optiValidation2_guide_1202	390	0.0166476	8	0.0149427	0.897587	1617
3992	CATCAGTCATCGACTACCAG	optiValidation2_guide_2836	977	0.0417043	20	0.0373566	0.89575	1618
568	CCGGCGATAGCATATCCAAA	optiValidation2_guide_1654	880	0.0375638	18	0.033621	0.895037	1619
2957	CAATCTATTTTACCAATACG	optiValidation2_guide_2481	441	0.0188246	9	0.0168105	0.893008	1620
1074	CAACCAATCTGAAAGATCCA	optiValidation2_guide_3352	1424	0.060785	29	0.0541671	0.891127	1621
1127	CTAATTGCTGTAATTCTCAG	optiValidation2_guide_75	444	0.0189526	9	0.0168105	0.886974	1622
3088	CAGGTACCCCCAACGAACAA	optiValidation2_guide_1781	741	0.0316304	15	0.0280175	0.885777	1623
1828	CTACATTCACGTCCTATCCA	optiValidation2_guide_2035	346	0.0147694	7	0.0130748	0.885265	1624
1175	CAGGGAAACTGTGCGTGACA	optiValidation2_guide_3088	1137	0.0485341	23	0.0429601	0.885154	1625
2268	CTGCGCCAACAAACGAAAGG	optiValidation2_guide_875	445	0.0189953	9	0.0168105	0.884981	1626
25	GCTACGGATTTCCAATAAAG	optiValidation2_guide_293	1138	0.0485768	23	0.0429601	0.884376	1627
4134	TTAACCTGTGTGTAGCCGAG	optiValidation2_guide_116	396	0.0169037	8	0.0149427	0.883988	1628
1538	CAACTATCTCACCTGACGAA	optiValidation2_guide_998	942	0.0402103	19	0.0354888	0.88258	1629
1637	TGGGGCCCTTTATTGCCGAG	optiValidation2_guide_2293	496	0.0211723	10	0.0186783	0.882205	1630
569	TTGTGGGTCGGTAAAAGGCA	optiValidation2_guide_546	796	0.0339781	16	0.0298853	0.879545	1631
3592	CATATACCATCACTTAACCG	optiValidation2_guide_545	598	0.0255263	12	0.022414	0.878075	1632
2605	TAAAGACCCATACAACCCGG	optiValidation2_guide_625	350	0.0149401	7	0.0130748	0.875148	1633
2191	CCGGTGCCTTACCCATCCAA	optiValidation2_guide_680	652	0.0278313	13	0.0242818	0.872463	1634
1097	CGATGGGCACGGTTTTGAGG	optiValidation2_guide_3315	603	0.0257397	12	0.022414	0.870794	1635
617	ACTACTAAAAGTACGAGCAA	optiValidation2_guide_2126	654	0.0279167	13	0.0242818	0.869795	1636
2565	TTAGGGAAATACACACTACA	optiValidation2_guide_2128	453	0.0193368	9	0.0168105	0.869352	1637
2955	CAGTACCCCAAACAATCCCA	optiValidation2_guide_1338	705	0.0300937	14	0.0261497	0.868941	1638
3559	CTATCATGCTCCCCTTCCAA	optiValidation2_guide_2590	303	0.0129339	6	0.011207	0.866483	1639
223	CTTATGTGCAACCAAAAAAG	optiValidation2_guide_1132	606	0.0258678	12	0.022414	0.866483	1640
1234	GGGTTCAACCACTTGACAAA	optiValidation2_guide_3072	303	0.0129339	6	0.011207	0.866483	1641
1395	ACGATGAGAATGAATATGGG	optiValidation2_guide_3100	1013	0.043241	20	0.0373566	0.863917	1642
785	TTTCATACTTATTTAACGCA	optiValidation2_guide_1831	152	0.00648829	3	0.0056035	0.863633	1643
2891	ACTTTACATAAATTGATACA	optiValidation2_guide_2253	559	0.0238615	11	0.0205462	0.861058	1644
1073	ACTTAACCTAAATTGATACA	optiValidation2_guide_2660	407	0.0173732	8	0.0149427	0.860096	1645
3440	AGAAACCATTTAATTCACCA	optiValidation2_guide_2825	407	0.0173732	8	0.0149427	0.860096	1646
3517	CCTGCTCCTGGTCATATGGG	optiValidation2_guide_1	764	0.0326122	15	0.0280175	0.859111	1647
269	CATACTAGAGTAGATCCGCG	optiValidation2_guide_1143	663	0.0283009	13	0.0242818	0.857988	1648
3425	CCTGAAGCCCGGATGACGAA	optiValidation2_guide_685	1071	0.0457168	21	0.0392245	0.857988	1649
3463	ACTCGAGACTGTGTTAGAAA	optiValidation2_guide_2543	816	0.0348319	16	0.0298853	0.857988	1650
1864	CCACATTTCCTTACTATCCG	optiValidation2_guide_1495	613	0.0261666	12	0.022414	0.856588	1651
3857	TATGAACCCAACGTTACACG	optiValidation2_guide_1457	460	0.0196356	9	0.0168105	0.856123	1652
798	AAATTCACCACTTTGCCCAA	optiValidation2_guide_234	307	0.0131046	6	0.011207	0.855193	1653
3710	CTGACTGCCCGGTCTCCCCA	optiValidation2_guide_2833	564	0.024075	11	0.0205462	0.853424	1654
306	ACACAGTCATGCTCTTAGGA	optiValidation2_guide_2220	667	0.0284716	13	0.0242818	0.852843	1655
165	ACGCTTAGAGATTAAAGCCA	optiValidation2_guide_2849	667	0.0284716	13	0.0242818	0.852843	1656
2483	ATTTCGGCAGCGGTACTAGG	optiValidation2_guide_1113	308	0.0131473	6	0.011207	0.852417	1657
1449	CCTCCACGTAGGCAACACGG	optiValidation2_guide_1298	565	0.0241176	11	0.0205462	0.851914	1658
2420	ATAGTTTACCCAACGTAGCA	optiValidation2_guide_3464	257	0.0109703	5	0.00933916	0.851311	1659
2236	AGGGCTCCATTCGCGCTGCA	optiValidation2_guide_2930	310	0.0132327	6	0.011207	0.846917	1660
3613	CCTAGAGAATCAACTTTGAG	optiValidation2_guide_1775	775	0.0330817	15	0.0280175	0.846917	1661
2993	ACTGCAAATCTTCAGCCAGG	optiValidation2_guide_3560	672	0.0286851	13	0.0242818	0.846497	1662
4099	CAATAGCTTACCATGTTAGG	optiValidation2_guide_3644	724	0.0309047	14	0.0261497	0.846137	1663
3647	CCTCTAGTTCTAACAATAAA	optiValidation2_guide_2830	414	0.017672	8	0.0149427	0.845553	1664
3301	GCTAGCCCCTACAAAACGCA	optiValidation2_guide_2542	466	0.0198917	9	0.0168105	0.8451	1665
968	ACGCCGCGTCTACCAAGACG	optiValidation2_guide_3346	725	0.0309474	14	0.0261497	0.84497	1666
296	AAGCGTATAAGCGTGAGGAA	optiValidation2_guide_776	570	0.0243311	11	0.0205462	0.844441	1667
449	CTTTACATCTACCAGTCGAG	optiValidation2_guide_1509	364	0.0155377	7	0.0130748	0.841488	1668
1357	AGGAGGTTCTATGATAACCA	optiValidation2_guide_3285	520	0.0221968	10	0.0186783	0.841488	1669
3320	CCAAACACTTGACATTCACG	optiValidation2_guide_2971	783	0.0334232	15	0.0280175	0.838264	1670
4226	CCGTGATGCCCATTACACAA	optiValidation2_guide_51	731	0.0312035	14	0.0261497	0.838035	1671
3433	TCAACTGGAATCGTATGACA	optiValidation2_guide_1535	367	0.0156658	7	0.0130748	0.83461	1672
4073	ATAGGCCTAGTCCTTCCGGG	optiValidation2_guide_2878	315	0.0134461	6	0.011207	0.833474	1673
1714	TTTGCAGCAACCCCGCGACA	optiValidation2_guide_346	630	0.0268922	12	0.022414	0.833474	1674
1651	GCTCTGCGATAATAAATAAG	optiValidation2_guide_3452	473	0.0201905	9	0.0168105	0.832593	1675
501	TTGATACTTAGACTGTAAGA	optiValidation2_guide_396	263	0.0112264	5	0.00933916	0.831889	1676
23	CATCTTGCATACCTGAAACA	optiValidation2_guide_1867	789	0.0336793	15	0.0280175	0.831889	1677
862	CTAATAGAACACCCAACCCG	optiValidation2_guide_2452	633	0.0270203	12	0.022414	0.829524	1678
1029	CATCGCAAAGAACCGTGGCA	optiValidation2_guide_1787	1372	0.0585653	26	0.0485636	0.829222	1679
151	CCGACCCTTTTACCAAGGGA	optiValidation2_guide_3663	741	0.0316304	14	0.0261497	0.826725	1680
3295	CATAATCTATAGATTACGCA	optiValidation2_guide_3286	636	0.0271484	12	0.022414	0.825611	1681
203	CATGATATAAAAGAATTGAG	optiValidation2_guide_3844	265	0.0113118	5	0.00933916	0.825611	1682
1655	CAAATCACACACAATACAGA	optiValidation2_guide_1210	849	0.0362405	16	0.0298853	0.824639	1683
2876	GGACGGACTGCATTATAACG	optiValidation2_guide_475	425	0.0181416	8	0.0149427	0.823668	1684
1094	CTATCCCAAGTTGATCTACG	optiValidation2_guide_657	372	0.0158792	7	0.0130748	0.823392	1685
3269	TAACGCGCTAACTCACACCA	optiValidation2_guide_2819	585	0.0249714	11	0.0205462	0.822788	1686
1591	ACGTTCTATCTACTACCAGG	optiValidation2_guide_2120	320	0.0136596	6	0.011207	0.820451	1687
3535	CGGCAATGACGTAAAAGGGA	optiValidation2_guide_3571	1442	0.0615534	27	0.0504315	0.819313	1688
1248	ACGCAAATCTTGTAATGAAG	optiValidation2_guide_1945	481	0.020532	9	0.0168105	0.818745	1689
2223	GCAGACCTTTGATCTTTAAG	optiValidation2_guide_2110	428	0.0182697	8	0.0149427	0.817895	1690
3227	TGACCACGACAACCTAGCAG	optiValidation2_guide_1053	375	0.0160073	7	0.0130748	0.816805	1691
395	CTAGTTCGTTGTGTTCGAAA	optiValidation2_guide_3696	536	0.0228797	10	0.0186783	0.816369	1692
1549	TAAACCCTATAGACGTCAGG	optiValidation2_guide_1271	268	0.0114399	5	0.00933916	0.816369	1693
721	AAGCGGGGTTGATAAAACAG	optiValidation2_guide_171	858	0.0366247	16	0.0298853	0.815989	1694
755	ACAGGGTGTTTGAAATCCAA	optiValidation2_guide_3114	805	0.0343623	15	0.0280175	0.815355	1695
2629	CAAAAAGACACACTGCGCAG	optiValidation2_guide_3859	968	0.0413201	18	0.033621	0.81367	1696
52	GAAGAGGACCTATCAACAGG	optiValidation2_guide_3654	753	0.0321426	14	0.0261497	0.81355	1697
2150	AGTCACACATTTACGCCAGA	optiValidation2_guide_3145	431	0.0183977	8	0.0149427	0.812202	1698
2594	GTTACGAGCCAAGTTTACGA	optiValidation2_guide_3489	378	0.0161353	7	0.0130748	0.810322	1699
2952	CGAACCTCTGCCATGTGGCG	optiValidation2_guide_1933	594	0.0253555	11	0.0205462	0.810322	1700
292	TGGGCGGAACACTTATGACG	optiValidation2_guide_1171	542	0.0231359	10	0.0186783	0.807332	1701
1504	GCAGGCATAACTCCAAGAAG	optiValidation2_guide_3851	705	0.0300937	13	0.0242818	0.806874	1702
3942	CGAAGAAATCACGTGTGAAA	optiValidation2_guide_4187	1085	0.0463144	20	0.0373566	0.806588	1703
2597	GCACCTTGCAACACATTGGG	optiValidation2_guide_698	706	0.0301364	13	0.0242818	0.805731	1704
2533	TTTTCAAATATACTTCCGCA	optiValidation2_guide_2885	163	0.00695783	3	0.0056035	0.805351	1705
3178	CTATCTCCCTCTTAAACACA	optiValidation2_guide_3039	490	0.0209162	9	0.0168105	0.803707	1706
1280	CGAAACGACTGAATAAACGG	optiValidation2_guide_650	708	0.0302218	13	0.0242818	0.803455	1707
1418	ACACTTTAACTTGAGTAGCA	optiValidation2_guide_512	491	0.0209589	9	0.0168105	0.80207	1708
1494	CCAATCGGAAGATAAATACA	optiValidation2_guide_3109	982	0.0419177	18	0.033621	0.80207	1709
2457	CCTAAGTGCTAATAAACACA	optiValidation2_guide_2796	873	0.037265	16	0.0298853	0.801968	1710
2553	CAGACCTTAAAAATACAGAG	optiValidation2_guide_4001	932	0.0397834	17	0.0317531	0.79815	1711
2217	TGTCCGACCAACGATTAAGG	optiValidation2_guide_548	549	0.0234347	10	0.0186783	0.797038	1712
1329	CATATTAACTCAAATAGACG	optiValidation2_guide_2292	604	0.0257824	11	0.0205462	0.796906	1713
1882	CGTTACCCCCCTTTGTCGCG	optiValidation2_guide_3406	714	0.0304779	13	0.0242818	0.796703	1714
77	CCTACCAGTGCACAGACAAA	optiValidation2_guide_221	934	0.0398688	17	0.0317531	0.796441	1715
4057	CTTGGGCAACGTTTGTTCGA	optiValidation2_guide_3143	495	0.0211296	9	0.0168105	0.795589	1716
46	CAATTGACCAACTTGCAGGA	optiValidation2_guide_3652	550	0.0234774	10	0.0186783	0.795589	1717
3149	AGGATCCCATCATTTTTCAA	optiValidation2_guide_69	386	0.0164768	7	0.0130748	0.793528	1718
3357	AATGATCTAGGGACTATGGG	optiValidation2_guide_4101	552	0.0235627	10	0.0186783	0.792706	1719
4115	AATCGAAACTAGGCAACACA	optiValidation2_guide_3507	497	0.021215	9	0.0168105	0.792387	1720
1514	TGTGCTTCAGTAATGTCCCA	optiValidation2_guide_1291	442	0.0188673	8	0.0149427	0.791989	1721
3736	CAGATATACAGTTCACACCG	optiValidation2_guide_2723	664	0.0283436	12	0.022414	0.790796	1722
2248	TGATGACAAGTCCTTTGCAA	optiValidation2_guide_3320	277	0.011824	5	0.00933916	0.789845	1723
2228	TCAAGAAATTATCAGAACAG	optiValidation2_guide_1012	444	0.0189526	8	0.0149427	0.788421	1724
2758	CAAAAAGTAAGTCAACCACA	optiValidation2_guide_1969	777	0.0331671	14	0.0261497	0.788421	1725
2759	CATAACACAAAGAAATTAAG	optiValidation2_guide_2400	1166	0.049772	21	0.0392245	0.788083	1726
1630	GCTACAATAGCTGCTCAGAA	optiValidation2_guide_818	667	0.0284716	12	0.022414	0.787239	1727
1008	TTTGGCAACAGCCTTCCCCG	optiValidation2_guide_2755	167	0.00712858	3	0.0056035	0.786061	1728
408	CTGTGACATCGTTAGTGCAA	optiValidation2_guide_3949	725	0.0309474	13	0.0242818	0.784615	1729
2731	ACGTCCACTTCTTAGTTAAA	optiValidation2_guide_2251	168	0.00717126	3	0.0056035	0.781382	1730
3061	TAAAGACTATGACCACACAG	optiValidation2_guide_2616	785	0.0335086	14	0.0261497	0.780387	1731
3762	CCGGAAAATAAGAATTAGAG	optiValidation2_guide_1410	843	0.0359844	15	0.0280175	0.778601	1732
2611	TGGGGCTCTCTATTGCCGAG	optiValidation2_guide_4012	394	0.0168183	7	0.0130748	0.777416	1733
4119	CAGTACCACAAACAATCCCA	optiValidation2_guide_4215	511	0.0218126	9	0.0168105	0.770678	1734
2936	ACATGTAAATGCCTGTAGGA	optiValidation2_guide_578	342	0.0145986	6	0.011207	0.767673	1735
868	ATACGGGTAATGACTCACAA	optiValidation2_guide_1330	570	0.0243311	10	0.0186783	0.767673	1736
1999	CTGTTACCTCCGAAATGCAG	optiValidation2_guide_782	570	0.0243311	10	0.0186783	0.767673	1737
402	CTTTTATACTATCTTAGGAG	optiValidation2_guide_3698	399	0.0170318	7	0.0130748	0.767673	1738
4059	CCAGCCCGAATATCGCCCCA	optiValidation2_guide_277	856	0.0365393	15	0.0280175	0.766777	1739
3853	CCGTTCACTGTGTATCAGAA	optiValidation2_guide_926	858	0.0366247	15	0.0280175	0.764989	1740
400	TCTCCCAATACTAATATAGA	optiValidation2_guide_632	458	0.0195502	8	0.0149427	0.764321	1741
757	AGTGGGTTCATGTTGTCACG	optiValidation2_guide_1523	573	0.0244591	10	0.0186783	0.763654	1742
3341	CATTGAAATCTGTAGTGACA	optiValidation2_guide_152	745	0.0318011	13	0.0242818	0.763552	1743
2458	AATTTGCCCCATCCTCCGGG	optiValidation2_guide_1629	172	0.00734201	3	0.0056035	0.76321	1744
1797	CTACACCCACCCATTAACGG	optiValidation2_guide_702	631	0.0269349	11	0.0205462	0.762807	1745
786	CGTAATAAAAGGTTATTCGG	optiValidation2_guide_665	574	0.0245018	10	0.0186783	0.762324	1746
248	ATTAACAATATTCAACACAA	optiValidation2_guide_3577	750	0.0320146	13	0.0242818	0.758461	1747
939	GCTGGTCACATTCATATCCA	optiValidation2_guide_3765	404	0.0172452	7	0.0130748	0.758173	1748
2822	CAGCACGGTTTTCATCACAA	optiValidation2_guide_1584	1155	0.0493024	20	0.0373566	0.757704	1749
2142	CGTACTGATCTTACAAGGGA	optiValidation2_guide_832	751	0.0320573	13	0.0242818	0.757451	1750
3120	CTAAAAAACCTGTTTCAGGA	optiValidation2_guide_2182	809	0.0345331	14	0.0261497	0.757235	1751
3392	CCACATTCCGCAGAGATAAA	optiValidation2_guide_1574	521	0.0222395	9	0.0168105	0.755886	1752
830	CAGTACCCCGCAATACCGAG	optiValidation2_guide_1564	811	0.0346184	14	0.0261497	0.755368	1753
3575	CTATCTCACTCTTCAACACA	optiValidation2_guide_2546	290	0.012379	5	0.00933916	0.754438	1754
728	CAGCACAACTAGGATAGACA	optiValidation2_guide_1406	1277	0.0545101	22	0.0410923	0.753847	1755
2388	CTAGGCCAAGTCACTAAAAA	optiValidation2_guide_1991	639	0.0272764	11	0.0205462	0.753257	1756
574	CCTTTTTTTCCATTTTGAAA	optiValidation2_guide_2320	349	0.0148974	6	0.011207	0.752276	1757
2940	CAGCTTATTTCTGTTTAGAG	optiValidation2_guide_2705	582	0.0248433	10	0.0186783	0.751845	1758
3986	CGTTAAAGTGTAACGCTACG	optiValidation2_guide_3744	641	0.0273618	11	0.0205462	0.750907	1759
3782	CTAGCCTTAAACTAGCCGAA	optiValidation2_guide_2438	351	0.0149828	6	0.011207	0.74799	1760
3127	CTATCAGGACCTGCAAGGCA	optiValidation2_guide_269	819	0.0349599	14	0.0261497	0.74799	1761
2829	CGTCGGCTTAGCGTTCGAAG	optiValidation2_guide_709	588	0.0250994	10	0.0186783	0.744173	1762
2020	CAAGTGCCAGAAATGCTAAA	optiValidation2_guide_3139	706	0.0301364	12	0.022414	0.743752	1763
1172	AAGAATAGCCTATAGCGAAG	optiValidation2_guide_125	412	0.0175867	7	0.0130748	0.743451	1764
1060	AAGGGCCCTGCGTTAATCGA	optiValidation2_guide_2504	589	0.0251421	10	0.0186783	0.74291	1765
3203	CCTATGCCTAGTAAGTAAGA	optiValidation2_guide_1071	589	0.0251421	10	0.0186783	0.74291	1766
3366	CGTACGAGATTTAAAAAGAA	optiValidation2_guide_1466	825	0.035216	14	0.0261497	0.74255	1767
199	GGTAGTGCCAATTCACGGGA	optiValidation2_guide_2378	825	0.035216	14	0.0261497	0.74255	1768
4071	AGTAAAGCTTCGAAATCCGG	optiValidation2_guide_296	473	0.0201905	8	0.0149427	0.740083	1769
2341	GGTAATTTAGAGGCGTACCG	optiValidation2_guide_501	473	0.0201905	8	0.0149427	0.740083	1770
2624	TATCCTAGCGCCACTTTACA	optiValidation2_guide_2023	355	0.0151536	6	0.011207	0.739561	1771
3600	CCACATCGTTGTATGCAGAA	optiValidation2_guide_1147	711	0.0303498	12	0.022414	0.738521	1772
477	CCTCGCCGACACTAACACAA	optiValidation2_guide_3469	652	0.0278313	11	0.0205462	0.738238	1773
2497	CCTCCCAGTAATACGTTGAG	optiValidation2_guide_3907	830	0.0354295	14	0.0261497	0.738076	1774
2895	CAAGTGAAAGAACATTTCGA	optiValidation2_guide_214	1070	0.0456741	18	0.033621	0.736106	1775
2797	GCGGCCCTACGTGTTCCAAG	optiValidation2_guide_3201	655	0.0279594	11	0.0205462	0.734857	1776
148	CTAAGGTAAGAAAATCAAAG	optiValidation2_guide_2718	656	0.0280021	11	0.0205462	0.733737	1777
3797	CAATATACCAGAACTTACCA	optiValidation2_guide_2098	537	0.0229224	9	0.0168105	0.733364	1778
2215	AATCCAGGCATAGCAAGGGG	optiValidation2_guide_2929	538	0.0229651	9	0.0168105	0.732001	1779
2835	TCTGCGATTTCCGAAAGAGA	optiValidation2_guide_1865	479	0.0204466	8	0.0149427	0.730812	1780
2873	CCACATACATAATTTTTAGA	optiValidation2_guide_2278	720	0.030734	12	0.022414	0.72929	1781
1033	CCGAAATAAAATGAATCAAA	optiValidation2_guide_1282	660	0.0281728	11	0.0205462	0.72929	1782
1601	GAACCTTGTAGGGCTATGGG	optiValidation2_guide_358	360	0.015367	6	0.011207	0.72929	1783
3944	TTAACCTGTGTTTAGCCGAG	optiValidation2_guide_3740	360	0.015367	6	0.011207	0.72929	1784
2343	CCAATCAGTGCAACGTACGG	optiValidation2_guide_1453	901	0.0384602	15	0.0280175	0.72848	1785
3058	CCTTCCAAAGGCTCACCAGG	optiValidation2_guide_1182	421	0.0179708	7	0.0130748	0.727558	1786
3144	TCGCGGTCTGCTCCAATCAG	optiValidation2_guide_4072	421	0.0179708	7	0.0130748	0.727558	1787
1031	TTGATTAATCGCATATGCCG	optiValidation2_guide_1177	241	0.0102874	4	0.00747133	0.726264	1788
2357	TTGCCTTCCCTAAAAACAAG	optiValidation2_guide_2082	241	0.0102874	4	0.00747133	0.726264	1789
2948	CCACATACATAATATCTAGA	optiValidation2_guide_2960	784	0.0334659	13	0.0242818	0.725569	1790
688	GTTTAGATCTTGGCGCCGGG	optiValidation2_guide_3049	181	0.00772618	3	0.0056035	0.725261	1791
2137	CTGGCACCTCTACATTAAAG	optiValidation2_guide_2465	363	0.0154951	6	0.011207	0.723263	1792
2229	TCTTACACTTTCTAGTAAAG	optiValidation2_guide_453	363	0.0154951	6	0.011207	0.723263	1793
634	CCGCACGAACCAGAATAGAG	optiValidation2_guide_3733	1211	0.0516929	20	0.0373566	0.722665	1794
421	CAATTACTTTGCGATACAAA	optiValidation2_guide_3702	364	0.0155377	6	0.011207	0.721276	1795
2919	CATGTTTATTCTGTACACGA	optiValidation2_guide_3516	668	0.0285143	11	0.0205462	0.720556	1796
2264	CTGAGGAGTTGCTAGAGACA	optiValidation2_guide_3967	973	0.0415336	16	0.0298853	0.719546	1797
724	CATGAGAGTAGAATTCTGAA	optiValidation2_guide_613	669	0.028557	11	0.0205462	0.719479	1798
7	CGGAGTGTAATCTATTCCAG	optiValidation2_guide_3647	1034	0.0441374	17	0.0317531	0.719415	1799
1759	GTTATACGTTTAGATAAGAG	optiValidation2_guide_3890	365	0.0155804	6	0.011207	0.7193	1800
416	CTGCCCTCTGCAATGAAACG	optiValidation2_guide_109	791	0.0337647	13	0.0242818	0.719148	1801
2857	ACTCGGCGCGAAACGCTAAA	optiValidation2_guide_2806	611	0.0260812	10	0.0186783	0.71616	1802
1576	CTGCACTACCATTAGACCGA	optiValidation2_guide_189	735	0.0313743	12	0.022414	0.714406	1803
1663	AGATGCCAAGTCCTTTGCAA	optiValidation2_guide_3399	429	0.0183123	7	0.0130748	0.71399	1804
3671	TGTTCCTTCCATCTACCGAA	optiValidation2_guide_369	184	0.00785424	3	0.0056035	0.713436	1805
3026	AAACTGCACAGCCAACGCCG	optiValidation2_guide_1111	614	0.0262093	10	0.0186783	0.712661	1806
97	CCGGCGTATATAGATTACCA	optiValidation2_guide_1451	676	0.0288558	11	0.0205462	0.712028	1807
2363	CTGACCTAAGCACTGTGCAG	optiValidation2_guide_362	677	0.0288985	11	0.0205462	0.710977	1808
375	TGGAATTGTTTATCGATACG	optiValidation2_guide_1273	308	0.0131473	5	0.00933916	0.710347	1809
3152	CAGATATCCAGTTAACACCG	optiValidation2_guide_2675	678	0.0289412	11	0.0205462	0.709928	1810
3641	TAACTGTCCAGCTCTTGAGA	optiValidation2_guide_2346	370	0.0157939	6	0.011207	0.709579	1811
1485	ACTAGCAGTAACCCGCAGAA	optiValidation2_guide_473	620	0.0264654	10	0.0186783	0.705764	1812
3212	CTACGCCCAGCCGAAACGAG	optiValidation2_guide_2117	310	0.0132327	5	0.00933916	0.705764	1813
1034	GGGTTGCCCAAGCCGCACGA	optiValidation2_guide_750	558	0.0238188	9	0.0168105	0.705764	1814
1825	CTTGCAATCAAAATTACCGG	optiValidation2_guide_1801	748	0.0319292	12	0.022414	0.70199	1815
917	CCAGCCTGATATACTCCGAA	optiValidation2_guide_1516	998	0.0426007	16	0.0298853	0.701521	1816
4194	AGGCCCTTTGTGTATTCGAA	optiValidation2_guide_4033	251	0.0107142	4	0.00747133	0.697329	1817
3824	GTTACTTGCCAAGTTTACGA	optiValidation2_guide_4170	251	0.0107142	4	0.00747133	0.697329	1818
371	CAACCTTGCCATATGTCGGG	optiValidation2_guide_1341	816	0.0348319	13	0.0242818	0.697115	1819
2958	TTTTTTATACTTTATACCCA	optiValidation2_guide_2140	63	0.00268922	1	0.00186783	0.694562	1820
303	AGTACTAAAGATATATCAAG	optiValidation2_guide_3028	505	0.0215565	8	0.0149427	0.693186	1821
3909	CGACTTTCAAAATAAAAACA	optiValidation2_guide_590	379	0.016178	6	0.011207	0.692729	1822
3516	CGGTGGCCTCCGACTAGAAG	optiValidation2_guide_198	759	0.0323987	12	0.022414	0.691816	1823
1971	CTACGTCCTTGCACGATCAG	optiValidation2_guide_945	190	0.00811036	3	0.0056035	0.690906	1824
654	CATAACTCCGACCTTATAGG	optiValidation2_guide_1475	634	0.027063	10	0.0186783	0.69018	1825
3247	TAACAGAAATTATTAAGACG	optiValidation2_guide_3545	508	0.0216845	8	0.0149427	0.689093	1826
412	CGAAGAGGACTATAACGGGA	optiValidation2_guide_2127	765	0.0326549	12	0.022414	0.68639	1827
2603	CGAAGTGACCGGTCTAGAGG	optiValidation2_guide_664	766	0.0326976	12	0.022414	0.685494	1828
1931	TAAAGCACCTACGATCTACA	optiValidation2_guide_1931	575	0.0245445	9	0.0168105	0.684898	1829
3409	ATTTCCTCATTTAAATGCGG	optiValidation2_guide_3557	128	0.00546382	2	0.00373566	0.683709	1830
1040	CCAGATCGAAACGAGCTACA	optiValidation2_guide_3278	962	0.041064	15	0.0280175	0.682288	1831
2998	CGGCGGCGAGACCATTCGAA	optiValidation2_guide_130	1028	0.0438813	16	0.0298853	0.681049	1832
3667	CTGTTGCTCGAGGAGTACAA	optiValidation2_guide_2832	450	0.0192087	7	0.0130748	0.68067	1833
651	CCGAACAGTTTCCATTCGGA	optiValidation2_guide_1635	1032	0.0440521	16	0.0298853	0.678409	1834
1187	GGGTTCTACCACTTGAAAAA	optiValidation2_guide_2502	258	0.011013	4	0.00747133	0.678409	1835
984	AAATCAAGAACTTAACAAAA	optiValidation2_guide_176	452	0.0192941	7	0.0130748	0.677659	1836
2255	GAACAGCACTTCCCTACCCA	optiValidation2_guide_1437	517	0.0220687	8	0.0149427	0.677097	1837
1091	CGATGGGCCCGGGTTTGAGG	optiValidation2_guide_3786	777	0.0331671	12	0.022414	0.67579	1838
4084	CATAAATCTGGTCAAAACAG	optiValidation2_guide_1114	714	0.0304779	11	0.0205462	0.674133	1839
2549	TTAACGTGTGTGTAGCCGAG	optiValidation2_guide_3770	390	0.0166476	6	0.011207	0.673191	1840
1062	ACTGTAAACGATATACAGGG	optiValidation2_guide_2505	781	0.0333378	12	0.022414	0.672329	1841
1943	TTAGCGGATTCTCTATTGGG	optiValidation2_guide_3774	456	0.0194649	7	0.0130748	0.671714	1842
1471	CGTCCCCATATTTAGCGAAG	optiValidation2_guide_3106	261	0.0111411	4	0.00747133	0.670611	1843
3872	CGATACTTTATATTGAAAAG	optiValidation2_guide_2725	457	0.0195075	7	0.0130748	0.670244	1844
3962	CATTTCCAAGGCGAAACCAG	optiValidation2_guide_532	588	0.0250994	9	0.0168105	0.669756	1845
3426	GCTGGTTTACCGTAGCTAAG	optiValidation2_guide_3222	523	0.0223248	8	0.0149427	0.669329	1846
2832	CCGAAGGCAGAGCAGCTCAG	optiValidation2_guide_2700	850	0.0362832	13	0.0242818	0.669231	1847
1087	GCAGACCTACGCCAAACACG	optiValidation2_guide_1100	458	0.0195502	7	0.0130748	0.668781	1848
71	AGGATCTCATCATTTTTCAA	optiValidation2_guide_3854	394	0.0168183	6	0.011207	0.666356	1849
3201	CTAGACATTACGTCGACCCG	optiValidation2_guide_52	526	0.0224529	8	0.0149427	0.665512	1850
4085	TAGGGACGTACAGAGTCAAG	optiValidation2_guide_1707	724	0.0309047	11	0.0205462	0.664822	1851
704	GGTCATGAATCTTTACCGAA	optiValidation2_guide_1655	527	0.0224956	8	0.0149427	0.664249	1852
2668	GTAGTTCGATCAGCTCGACG	optiValidation2_guide_83	463	0.0197637	7	0.0130748	0.661559	1853
2715	GTAGCGTATGCTCCTATCAG	optiValidation2_guide_3501	398	0.0169891	6	0.011207	0.659659	1854
3423	CTTGGGACACGTTTGTTCGA	optiValidation2_guide_2436	665	0.0283863	10	0.0186783	0.658006	1855
3241	CTGTATCTTATCGCATAACA	optiValidation2_guide_2039	466	0.0198917	7	0.0130748	0.6573	1856
1305	TTGTGGACACAAGTACCGAG	optiValidation2_guide_187	333	0.0142145	5	0.00933916	0.657018	1857
2984	CCGCTTTCACTAGTTCACAG	optiValidation2_guide_1785	668	0.0285143	10	0.0186783	0.655051	1858
1116	CCGCCGGAAATTACTAAAAG	optiValidation2_guide_2887	1338	0.057114	20	0.0373566	0.654072	1859
1804	GATTATCTAAGGTCTAGGAA	optiValidation2_guide_888	201	0.00857991	3	0.0056035	0.653095	1860
1443	TCGGCCCTTATCGCGAGACA	optiValidation2_guide_268	604	0.0257824	9	0.0168105	0.652014	1861
2851	TGATAACGATACGCGTGAAG	optiValidation2_guide_1774	605	0.0258251	9	0.0168105	0.650936	1862
1639	AGGGATAACGCAACTAACGG	optiValidation2_guide_3872	1816	0.077518	27	0.0504315	0.650578	1863
3381	CAAGGGGCCTAGGCTACAAG	optiValidation2_guide_4109	942	0.0402103	14	0.0261497	0.650322	1864
2230	TGGCATTAAACACAACCACG	optiValidation2_guide_1732	743	0.0317158	11	0.0205462	0.647821	1865
3851	CCGGCACCCATTCATTAAGG	optiValidation2_guide_2238	946	0.0403811	14	0.0261497	0.647572	1866
3557	GGACGCCGCGCTATATCCAG	optiValidation2_guide_1422	338	0.0144279	5	0.00933916	0.647299	1867
4189	CAGCGGTCTCCCCAACTGGA	optiValidation2_guide_3536	678	0.0289412	10	0.0186783	0.645389	1868
1548	CTTTATCTCAAACTGTCACG	optiValidation2_guide_1304	340	0.0145133	5	0.00933916	0.643491	1869
2627	CGAAGGACTGAGCATCCGGA	optiValidation2_guide_1776	816	0.0348319	12	0.022414	0.643491	1870
433	CAGGGTTGTACGAAGCCCCG	optiValidation2_guide_2496	955	0.0407652	14	0.0261497	0.64147	1871
1894	AGGATCAGCTTACTAAGGAG	optiValidation2_guide_2518	614	0.0262093	9	0.0168105	0.641395	1872
3106	TCTACCTGTGGTATGCTAAG	optiValidation2_guide_332	410	0.0175013	6	0.011207	0.640352	1873
2827	CATTTCCATAAAGTTCACAA	optiValidation2_guide_3510	547	0.0233493	8	0.0149427	0.639962	1874
2814	ATGACATTTTGGGTAATACG	optiValidation2_guide_1333	479	0.0204466	7	0.0130748	0.639461	1875
105	AAGTGATATCTGTCACTGGG	optiValidation2_guide_1185	411	0.017544	6	0.011207	0.638794	1876
403	CGATCCACTACGGCTAACAA	optiValidation2_guide_1287	1097	0.0468267	16	0.0298853	0.638212	1877
2489	CTATGAGAACGTCTTACCGA	optiValidation2_guide_3993	892	0.038076	13	0.0242818	0.63772	1878
3682	AAGGATAAAGCAGTTTACAA	optiValidation2_guide_4016	550	0.0234774	8	0.0149427	0.636471	1879
3514	CAGCACGGTTTTTATCACAA	optiValidation2_guide_3566	894	0.0381614	13	0.0242818	0.636293	1880
2521	GCGGTAGTACGTTCAAGAGA	optiValidation2_guide_2091	758	0.0323561	11	0.0205462	0.635002	1881
357	CTGAGGTAAGAAAATCAAAG	optiValidation2_guide_631	827	0.0353014	12	0.022414	0.634932	1882
432	AATCGAAACTAGGCGACACA	optiValidation2_guide_1005	552	0.0235627	8	0.0149427	0.634165	1883
541	CCTCAGGTCGATCTTCACCA	optiValidation2_guide_3011	828	0.0353441	12	0.022414	0.634165	1884
3275	CCAGGAAGTTAGTTGTCAAA	optiValidation2_guide_2077	691	0.0294961	10	0.0186783	0.633247	1885
3564	CAAACCTGCTCTGCGTACCA	optiValidation2_guide_3720	693	0.0295815	10	0.0186783	0.63142	1886
3654	CCTGTGATATATACTAGCCG	optiValidation2_guide_465	416	0.0177574	6	0.011207	0.631116	1887
4162	CATCTAAGAACCATGTTACA	optiValidation2_guide_3839	486	0.0207454	7	0.0130748	0.63025	1888
1925	ATAGACATTACGTCGACCCG	optiValidation2_guide_3132	417	0.0178001	6	0.011207	0.629603	1889
2042	CAGCGGTGCTACTAGACCAG	optiValidation2_guide_562	906	0.0386736	13	0.0242818	0.627865	1890
702	CTGGAAACCAGGTAAACCCA	optiValidation2_guide_1621	839	0.0358136	12	0.022414	0.625851	1891
2141	CTATCTCCCTATTCAACACA	optiValidation2_guide_2643	280	0.0119521	4	0.00747133	0.625106	1892
1581	CTAGTTAGCTCGTTTTTAAA	optiValidation2_guide_412	350	0.0149401	5	0.00933916	0.625106	1893
1064	GGATTATAACTGGCTTGGGA	optiValidation2_guide_1770	350	0.0149401	5	0.00933916	0.625106	1894
2328	ATAGGCCAAGTCATTCCGGG	optiValidation2_guide_3152	491	0.0209589	7	0.0130748	0.623832	1895
2577	ACTGGTCCCATGCATCTAAA	optiValidation2_guide_15	351	0.0149828	5	0.00933916	0.623325	1896
411	TAGGGCCCAGCGTTAATCGA	optiValidation2_guide_2861	702	0.0299656	10	0.0186783	0.623325	1897
2462	CAGCACACTTAAAAGAGCGA	optiValidation2_guide_2284	1194	0.0509672	17	0.0317531	0.623011	1898
1896	CCTTTAATCCATTTACCACA	optiValidation2_guide_1325	281	0.0119948	4	0.00747133	0.622881	1899
3086	CAACTCTCTTCCGTACACCA	optiValidation2_guide_1830	496	0.0211723	7	0.0130748	0.617544	1900
3963	GCGACTACCAGGCCAAAGCG	optiValidation2_guide_606	496	0.0211723	7	0.0130748	0.617544	1901
1192	GAGGCTACTGATCTACCGAA	optiValidation2_guide_2898	780	0.0332952	11	0.0205462	0.617091	1902
2072	CAATGGGCCCGGTTTTGAGG	optiValidation2_guide_2921	923	0.0393993	13	0.0242818	0.616301	1903
847	CCATGGGTCCCAACTAAAAG	optiValidation2_guide_1421	710	0.0303071	10	0.0186783	0.616301	1904
3649	CATGAGGGCCTGGCTCTGAG	optiValidation2_guide_1758	1208	0.0515648	17	0.0317531	0.615791	1905
270	CCGGCACCCATACATCAAGG	optiValidation2_guide_2835	1210	0.0516502	17	0.0317531	0.614773	1906
1352	CCGCGGGTAGAGTAAACAAA	optiValidation2_guide_1393	1424	0.060785	20	0.0373566	0.61457	1907
2561	CTTTACCAATAGAAGAAGAA	optiValidation2_guide_2777	285	0.0121655	4	0.00747133	0.614139	1908
1792	CTTTTTCCCTTACTAATGCA	optiValidation2_guide_3330	285	0.0121655	4	0.00747133	0.614139	1909
1813	CCAACAACAGTCCATTCAAA	optiValidation2_guide_2587	784	0.0334659	11	0.0205462	0.613943	1910
3459	CAAGGGTGACCGCATAGGGA	optiValidation2_guide_4122	1283	0.0547663	18	0.033621	0.613899	1911
1181	CCATGCTCCGCTATTCACAG	optiValidation2_guide_1404	499	0.0213004	7	0.0130748	0.613831	1912
3735	ATGCCCACCCCCATGTCCAA	optiValidation2_guide_1197	357	0.0152389	5	0.00933916	0.612849	1913
1146	CTACCAATTTGTTTACCGCA	optiValidation2_guide_737	643	0.0274472	9	0.0168105	0.612467	1914
608	CTTCTGGATTAAGAAACAGA	optiValidation2_guide_2134	359	0.0153243	5	0.00933916	0.609434	1915
2840	GAGTAGAAATTTATGCCGGA	optiValidation2_guide_1289	431	0.0183977	6	0.011207	0.609152	1916
1242	CAAAGGGACCAGCAACGAAA	optiValidation2_guide_667	1222	0.0521624	17	0.0317531	0.608736	1917
3031	CCGCACAGATTACTGTCAGA	optiValidation2_guide_1088	1222	0.0521624	17	0.0317531	0.608736	1918
2729	CAATCTCGTAAGTAACCCCA	optiValidation2_guide_4026	647	0.0276179	9	0.0168105	0.608681	1919
4183	AAGGGCCAAACCGTTTAAAA	optiValidation2_guide_4224	504	0.0215138	7	0.0130748	0.607741	1920
645	AAAGGGGATGCCGAATTAAA	optiValidation2_guide_2055	577	0.0246299	8	0.0149427	0.606688	1921
674	AGACCCTACTGTGAGTAAGG	optiValidation2_guide_207	505	0.0215565	7	0.0130748	0.606538	1922
2849	CAATCTAGTTAGTAACCCCA	optiValidation2_guide_2530	433	0.0184831	6	0.011207	0.606338	1923
2882	GGAGGTTGAGCCTCGAGAAA	optiValidation2_guide_1839	650	0.027746	9	0.0168105	0.605872	1924
2787	AGACATAAAACCAATTCCGA	optiValidation2_guide_3178	651	0.0277887	9	0.0168105	0.604941	1925
2423	CAACATCCCGCCTTGTCGCG	optiValidation2_guide_734	651	0.0277887	9	0.0168105	0.604941	1926
2266	CAGCATAACCAAACTCTCGG	optiValidation2_guide_1372	868	0.0370515	12	0.022414	0.604941	1927
1480	CAATCTTGTTAGTAACCCCA	optiValidation2_guide_2224	508	0.0216845	7	0.0130748	0.602956	1928
3004	TAGGGAGGCCCTGTGCGAGA	optiValidation2_guide_4208	508	0.0216845	7	0.0130748	0.602956	1929
592	ATTGGTACTTCGGTATCACG	optiValidation2_guide_2743	363	0.0154951	5	0.00933916	0.602719	1930
2024	CCATGACCATGCGCGCCCAG	optiValidation2_guide_786	726	0.0309901	10	0.0186783	0.602719	1931
3790	CCACGTGAAGAACCAATACG	optiValidation2_guide_3096	1162	0.0496012	16	0.0298853	0.602511	1932
3053	CTGTCCAACCTTAAAAGCAA	optiValidation2_guide_2046	509	0.0217272	7	0.0130748	0.601772	1933
3602	TGGATAAAATCCCCGTGGAA	optiValidation2_guide_1484	291	0.0124217	4	0.00747133	0.601476	1934
3659	CCTAAATATCGCCCTACACG	optiValidation2_guide_848	729	0.0311182	10	0.0186783	0.600239	1935
1537	CCATACGTTCTAAATTGAAA	optiValidation2_guide_803	732	0.0312462	10	0.0186783	0.597779	1936
2270	CCTATAAGATTACAGATCCG	optiValidation2_guide_2681	586	0.0250141	8	0.0149427	0.59737	1937
2950	CGATGACAAAAAGATCTCCG	optiValidation2_guide_2654	661	0.0282155	9	0.0168105	0.595789	1938
2683	GAGCGACAACGGGATCCACG	optiValidation2_guide_1033	1103	0.0470828	15	0.0280175	0.595069	1939
4231	AGTTCTCCATACCAGAGCGA	optiValidation2_guide_437	515	0.0219833	7	0.0130748	0.594761	1940
3635	CTATGAAGAACCCCTCGGCA	optiValidation2_guide_1254	444	0.0189526	6	0.011207	0.591316	1941
1554	CTTTTACTCAATGAATCCAG	optiValidation2_guide_2389	222	0.00947631	3	0.0056035	0.591316	1942
3891	ACAGGGGACTGCAAGTTACA	optiValidation2_guide_3612	962	0.041064	13	0.0242818	0.591316	1943
4025	ATGAACAGCTTGGAAACGAG	optiValidation2_guide_4093	814	0.0347465	11	0.0205462	0.591316	1944
3819	GCATACAACCTCTTTCAAGA	optiValidation2_guide_2080	445	0.0189953	6	0.011207	0.589987	1945
2621	CAGTTCCAAATAGAATAACA	optiValidation2_guide_3546	668	0.0285143	9	0.0168105	0.589546	1946
3524	CCATAGTCCCTAAAGCAGAG	optiValidation2_guide_2370	817	0.0348745	11	0.0205462	0.589145	1947
2645	CGGGATACAAAACCACAGAG	optiValidation2_guide_525	893	0.0381187	12	0.022414	0.588005	1948
3419	TAAGCCTCCTTGCCACTCAA	optiValidation2_guide_4115	298	0.0127205	4	0.00747133	0.587347	1949
1778	GAATACCCTGCTGAAAAGGA	optiValidation2_guide_835	373	0.0159219	5	0.00933916	0.58656	1950
3294	CCGTAGACCTGACTACTACG	optiValidation2_guide_1154	672	0.0286851	9	0.0168105	0.586036	1951
910	ATTAACAATATCAAACACAA	optiValidation2_guide_2877	374	0.0159646	5	0.00933916	0.584992	1952
58	GTACACAAACCGGTATACGG	optiValidation2_guide_2443	525	0.0224102	7	0.0130748	0.583432	1953
2454	CTGTATCTAAGCCAATAGGA	optiValidation2_guide_2795	451	0.0192514	6	0.011207	0.582138	1954
2495	GCATCTGTTAATCATACCCG	optiValidation2_guide_329	376	0.01605	5	0.00933916	0.58188	1955
2511	CTATCACCCAATCCGTTACG	optiValidation2_guide_3798	903	0.0385455	12	0.022414	0.581494	1956
3546	GGGTTCTACCACTCGACAAA	optiValidation2_guide_4134	226	0.00964706	3	0.0056035	0.58085	1957
2607	ACTACACTCTATCCGACAAG	optiValidation2_guide_2588	453	0.0193368	6	0.011207	0.579568	1958
1490	AATAAGTCTTACTATCCCCG	optiValidation2_guide_1896	302	0.0128912	4	0.00747133	0.579568	1959
599	CAGGGGCCCCGCATACACAG	optiValidation2_guide_2869	984	0.0420031	13	0.0242818	0.578096	1960
4000	CTGATGTATTAGAAGCCCAG	optiValidation2_guide_3627	530	0.0226236	7	0.0130748	0.577928	1961
3343	CATTTTTTCGCTAAACCACA	optiValidation2_guide_3003	303	0.0129339	4	0.00747133	0.577655	1962
364	CCGTCGGGCTTCCATATACG	optiValidation2_guide_2129	379	0.016178	5	0.00933916	0.577274	1963
1413	ACAGGACGTTGTTAATACAA	optiValidation2_guide_940	531	0.0226663	7	0.0130748	0.576839	1964
1353	CCGCACCGACACTAACACAA	optiValidation2_guide_3828	1442	0.0615534	19	0.0354888	0.576554	1965
2615	ACTGTAAACGATATACCGGG	optiValidation2_guide_327	608	0.0259531	8	0.0149427	0.575755	1966
544	AGTATAATCTCGTCTACGGA	optiValidation2_guide_3719	228	0.00973243	3	0.0056035	0.575755	1967
1076	CAAAGTGACCGGTCTAGAGG	optiValidation2_guide_3073	912	0.0389297	12	0.022414	0.575755	1968
209	CCGACGTTTAGAACTCGCAA	optiValidation2_guide_3281	688	0.029368	9	0.0168105	0.572408	1969
1364	GGGCAGACACACCATCTGGG	optiValidation2_guide_3832	765	0.0326549	10	0.0186783	0.571992	1970
1908	CCAAACAGTTTCCATTCGGA	optiValidation2_guide_3407	843	0.0359844	11	0.0205462	0.570974	1971
1190	GGGACTAAACTTACGCTACG	optiValidation2_guide_3362	230	0.0098178	3	0.0056035	0.570749	1972
511	GAGGGGAACCCCGTGCACAA	optiValidation2_guide_330	537	0.0229224	7	0.0130748	0.570394	1973
1153	CATCATGTTACGGAGTACCG	optiValidation2_guide_732	691	0.0294961	9	0.0168105	0.569923	1974
3098	CAACCAATTTGAAAGATCCA	optiValidation2_guide_276	768	0.0327829	10	0.0186783	0.569758	1975
2394	CGGGGGATATAACCGTGACA	optiValidation2_guide_3461	1229	0.0524612	16	0.0298853	0.569665	1976
2635	CGGGGGATATCACCGTGACA	optiValidation2_guide_565	1229	0.0524612	16	0.0298853	0.569665	1977
2296	CTAACGCCACTGACTTCCAG	optiValidation2_guide_1412	461	0.0196783	6	0.011207	0.56951	1978
4129	CGTGTCCGATATAAAAACGA	optiValidation2_guide_1076	615	0.026252	8	0.0149427	0.569202	1979
2421	CCGCCGTCTATTAAATTCGA	optiValidation2_guide_3160	846	0.0361124	11	0.0205462	0.568949	1980
1211	TCGCGCTAAAATAATAAAGG	optiValidation2_guide_2890	540	0.0230505	7	0.0130748	0.567225	1981
1450	CTTAACACCAAGAAATTAAG	optiValidation2_guide_4160	541	0.0230932	7	0.0130748	0.566177	1982
2813	CTTGGGCCACGTTTGTTAGA	optiValidation2_guide_2431	464	0.0198064	6	0.011207	0.565828	1983
3118	CAACTGATATAAGTATGCCA	optiValidation2_guide_1676	774	0.033039	10	0.0186783	0.565341	1984
943	CGAGCCTCCCATAAGTTACG	optiValidation2_guide_2322	698	0.0297949	9	0.0168105	0.564207	1985
3407	CAATGTGAAAAATATATACA	optiValidation2_guide_797	780	0.0332952	10	0.0186783	0.560992	1986
1067	CATGATATAAAAGTATAGAG	optiValidation2_guide_2553	235	0.0100312	3	0.0056035	0.558605	1987
1818	CGACGCTGAGCTGCACTGGA	optiValidation2_guide_789	470	0.0200625	6	0.011207	0.558605	1988
3024	CCACCAGGAAACAAGCCCAA	optiValidation2_guide_1386	1568	0.0669318	20	0.0373566	0.55813	1989
1653	ACACAGTCATGCTCTCAGGA	optiValidation2_guide_126	549	0.0234347	7	0.0130748	0.557927	1990
3724	AATTGTCGTAAAGCAACGGA	optiValidation2_guide_1518	628	0.0268069	8	0.0149427	0.557419	1991
2752	GAACTGCATGCGACGACCGG	optiValidation2_guide_1706	628	0.0268069	8	0.0149427	0.557419	1992
924	CCTCCAGGCTGCGCTATGGG	optiValidation2_guide_1192	786	0.0335513	10	0.0186783	0.55671	1993
3310	CGATGCTAAGCCCTGTGAGG	optiValidation2_guide_3379	629	0.0268496	8	0.0149427	0.556533	1994
583	AAGGTGATTTAAATACTCGG	optiValidation2_guide_2742	236	0.0100739	3	0.0056035	0.556238	1995
867	TTGAAGAAAACCACGCTGAG	optiValidation2_guide_1832	551	0.02352	7	0.0130748	0.555901	1996
3427	CCTGTATAAAGTCCGATCAA	optiValidation2_guide_270	630	0.0268922	8	0.0149427	0.555649	1997
3982	CCGCATACATAATTTCTAGA	optiValidation2_guide_4192	631	0.0269349	8	0.0149427	0.554769	1998
1042	CTGGGTCCTAGAGTAAGCAA	optiValidation2_guide_3776	474	0.0202332	6	0.011207	0.553891	1999
[truncated: 2,233 more rows]
