# Supplementary material for: Circular synthesized CRISPR/Cas gRNAs for functional interrogations in the coding and noncoding genome
Source: eLife journal article supplement (doi:10.7554/elife.42549), 2019-03-06
Supplement: supp [file elife-42549-supp-v1.zip › elife_poa_e42549_Supplementary_File_12.xlsx]

## Sheet: Hits
	Unnamed: 0	Guide	Read counts CTRL	CTRL (%)	Read counts Doxo	Doxo (%)	Doxo(%)/CTRL(%)	position	annotation	mismatch	upstream_genes	downstream_genes	Coding_Genes
317	121	TAATACCTAGTAGTACTAGA	283	0.0120802	14	0.0261394	2.16383	chr14: 49663308	protein_coding: POLE2	0	['LRR1', 'RPL36AL', 'MGAT2', 'DNAAF2', 'POLE2']	['KLHDC1', 'KLHDC2', 'NEMF', 'ARF6', 'VCPKMT']	POLE2
328	126	GAAACGCACAACACTCAGCA	674	0.0287704	61	0.113893	3.95869	chr13: 48707205	protein_coding: CYSLTR2	0	['ITM2B', 'RB1', 'LPAR6', 'RCBTB2', 'CYSLTR2']	['FNDC3A', 'MLNR', 'CDADC1', 'CAB39L', 'SETDB2']	CYSLTR2
357	134	AGTAATTGAGAGATACAAGG	567	0.024203	41	0.0765511	3.16287	chr5: 77412152	protein_coding: AC022414.1, protein_coding: PDE8B	0	['AGGF1', 'AC008581.2', 'ZBED3', 'AC022414.1', 'PDE8B']	['WDR41', 'OTP', 'TBCA', 'AP3B1', 'SCAMP1']	AC022414.1, PDE8B
499	183	CGACAAACTTATCTGTGCAG	625	0.0266788	58	0.108292	4.05909	chrX: 1352468	protein_coding: IL3RA	0	['PPP2R3B', 'SHOX', 'CRLF2', 'CSF2RA', 'IL3RA']	['SLC25A6', 'ASMTL', 'P2RY8', 'AKAP17A', 'ASMT']	IL3RA
537	199	ATACTTCACGGCCCGACACA	315	0.0134461	28	0.0522788	3.88802	chrX: 153905834	protein_coding: AVPR2, protein_coding: U52112.2	0	['SSR4', 'PDZD4', 'L1CAM', 'U52112.2', 'AVPR2']	['ARHGAP4', 'NAA10', 'RENBP', 'HCFC1', 'TMEM187']	AVPR2, U52112.2
29	9	CAATTTATTTCACCAATACG	322	0.0137449	34	0.0634814	4.61853	chr9: 5403147	protein_coding: PLGRKT	1	['INSL6', 'INSL4', 'RLN2', 'RLN1', 'PLGRKT']	['CD274', 'PDCD1LG2', 'RIC1', 'ERMP1', 'KIAA2026']	PLGRKT
101	36	CTTTTCCAATAGCAGAAGAA	210	0.00896408	40	0.074684	8.33147	chr5: 79496284	protein_coding: HOMER1	1	['DMGDH', 'BHMT2', 'BHMT', 'JMY', 'HOMER1']	['TENT2', 'CMYA5', 'MTX3', 'THBS4', 'SERINC5']	HOMER1
115	42	AGGTTCCCATTTAATAAGAA	305	0.0130193	14	0.0261394	2.00775	chr10: 127289202	protein_coding: DOCK1	1	['FANK1', 'ADAM12', 'C10orf90', 'DOCK1', 'FAM196A']	['NPS', 'AL391005.1', 'FOXI2', 'CLRN3', 'PTPRE']	DOCK1
399	149	AGACTACCCTGAAATTAACA	483	0.0206174	28	0.0522788	2.53567	chr12: 77705430	protein_coding: NAV3	1	['OSBPL8', 'ZDHHC17', 'CSRP2', 'E2F7', 'NAV3']	['SYT1', 'PAWR', 'PPP1R12A', 'PPP1R12A-AS1', 'OTOGL']	NAV3
511	189	CAAGGTATTGAAGCTAAAAG	584	0.0249287	77	0.143767	5.76712	chr17: 65181562	protein_coding: RGS9	1	['CEP95', 'SMURF2', 'LRRC37A3', 'GNA13', 'RGS9']	['AXIN2', 'AC004805.1', 'CEP112', 'APOH', 'PRKCA']	RGS9
7	2	CTGCCTGTTGCCAAAAGCAG	716	0.0305632	57	0.106425	3.48211	chr3: 134824475	protein_coding: EPHB1	2	['AMOTL2', 'ANAPC13', 'CEP63', 'EPHB1', 'KY']	['PPP2R3A', 'MSL2', 'PCCB', 'STAG1', 'SLC35G2']	EPHB1
14	5	TATATTGATACCATATAGAG	284	0.0121229	14	0.0261394	2.15621	chr14: 89133376	protein_coding: FOXN3	2	['PTPN21', 'ZC3H14', 'EML5', 'TTC8', 'FOXN3']	['EFCAB11', 'TDP1', 'KCNK13', 'PSMC1', 'NRDE2']	FOXN3
17	6	CAGGCACCAAAAACAAAACA	628	0.0268069	64	0.119494	4.4576	chr7: 21627290	protein_coding: DNAH11	2	['ITGB8', 'ABCB5', 'SP8', 'SP4', 'DNAH11']	['CDCA7L', 'RAPGEF5', 'STEAP1B', 'IL6', 'TOMM7']	DNAH11
18	6	CAGGCACCAAAAACAAAACA	628	0.0268069	64	0.119494	4.4576	chr12: 86603005	protein_coding: MGAT4C, lincRNA: AC010196.1	2	['LRRIQ1', 'ALX1', 'RASSF9', 'NTS', 'MGAT4C']	['AC079597.1', 'C12orf50', 'C12orf29', 'CEP290', 'TMTC3']	MGAT4C
19	6	CAGGCACCAAAAACAAAACA	628	0.0268069	64	0.119494	4.4576	chr10: 62451286	protein_coding: ZNF365	2	['TMEM26', 'CABCOCO1', 'ARID5B', 'RTKN2', 'ZNF365']	['ADO', 'EGR2', 'NRBF2', 'JMJD1C', 'REEP3']	ZNF365
21	6	CAGGCACCAAAAACAAAACA	628	0.0268069	64	0.119494	4.4576	chr19: 11055490	protein_coding: SMARCA4	2	['C19orf38', 'CARM1', 'YIPF2', 'TIMM29', 'SMARCA4']	['LDLR', 'SPC24', 'KANK2', 'DOCK6', 'AC011472.5']	SMARCA4
22	6	CAGGCACCAAAAACAAAACA	628	0.0268069	64	0.119494	4.4576	chr2: 105096468	protein_coding: MRPS9	2	['MFSD9', 'TMEM182', 'AC068057.2', 'POU3F3', 'MRPS9']	['GPR45', 'TGFBRAP1', 'C2orf49', 'FHL2', 'NCK2']	MRPS9
27	8	CTACTCCAAATTATTTAACA	551	0.02352	61	0.113893	4.84238	chr22: 39774650	protein_coding: ENTHD1	2	['AL022312.1', 'ATF4', 'RPS19BP1', 'CACNA1I', 'ENTHD1']	['GRAP2', 'Z82206.1', 'FAM83F', 'TNRC6B', 'ADSL']	ENTHD1
29	9	CAATTTATTTCACCAATACG	322	0.0137449	34	0.0634814	4.61853	chr22: 39774650	protein_coding: ENTHD1	2	['AL022312.1', 'ATF4', 'RPS19BP1', 'CACNA1I', 'ENTHD1']	['GRAP2', 'Z82206.1', 'FAM83F', 'TNRC6B', 'ADSL']	ENTHD1
30	9	CAATTTATTTCACCAATACG	322	0.0137449	34	0.0634814	4.61853	chr3: 79563008	protein_coding: ROBO1	2	['CNTN3', 'FRG2C', 'ZNF717', 'ROBO2', 'ROBO1']	['GBE1', 'CADM2', 'VGLL3', 'CHMP2B', 'POU1F1']	ROBO1
32	10	TGATACAATTTAGCTACAGA	346	0.0147694	19	0.0354749	2.40192	chr13: 46672902	protein_coding: LRCH1	2	['AL137141.1', 'LCP1', 'LRRC63', 'RUBCNL', 'LRCH1']	['ESD', 'HTR2A', 'SUCLA2', 'NUDT15', 'MED4']	LRCH1
38	12	TGAAAAGACCATATACAGAG	500	0.021343	34	0.0634814	2.97434	chr6: 143729279	protein_coding: PHACTR2	2	['AIG1', 'ADAT2', 'PEX3', 'FUCA2', 'PHACTR2']	['AL049844.1', 'LTV1', 'AL049844.3', 'ZC2HC1B', 'PLAGL1']	PHACTR2
41	12	TGAAAAGACCATATACAGAG	500	0.021343	34	0.0634814	2.97434	chr6: 146292343	protein_coding: GRM1	2	['EPM2A', 'AL023806.3', 'FBXO30', 'SHPRH', 'GRM1']	['RAB32', 'ADGB', 'STXBP5', 'SAMD5', 'SASH1']	GRM1
45	14	CTTCACGACCATCAAACCAG	362	0.0154524	38	0.0709498	4.59152	chr13: 41655927	protein_coding: VWA8	2	['KBTBD7', 'MTRF1', 'NAA16', 'RGCC', 'VWA8']	['DGKH', 'AKAP11', 'TNFSF11', 'FAM216B', 'EPSTI1']	VWA8
50	16	CAATGGCTTACCATGTTAGG	549	0.0234347	38	0.0709498	3.02756	chr8: 27451190	protein_coding: PTK2B	2	['DPYSL2', 'ADRA1A', 'STMN4', 'TRIM35', 'PTK2B']	['CHRNA2', 'EPHX2', 'CLU', 'SCARA3', 'AC013643.3']	PTK2B
52	17	TTAACCTGTGAGTAGCCGAG	245	0.0104581	26	0.0485446	4.64182	chr19: 7233366	protein_coding: INSR	2	['MBD3L4', 'MBD3L2', 'MBD3L3', 'ZNF557', 'INSR']	['AC119396.1', 'AC008878.3', 'ARHGEF18', 'PEX11G', 'TEX45']	INSR
54	18	CGGTGGTCTTTGGAACCCAG	521	0.0222395	36	0.0672156	3.02236	chr14: 92589522	protein_coding: RIN3	2	['ATXN3', 'NDUFB1', 'CPSF2', 'SLC24A4', 'RIN3']	['LGMN', 'GOLGA5', 'CHGA', 'ITPK1', 'MOAP1']	RIN3
57	19	AAGGATAAAGCAGTTAACAA	257	0.0109703	19	0.0354749	3.23371	chr3: 155602312	protein_coding: PLCH1	2	['AC134026.1', 'GPR149', 'MME', 'DWORF', 'PLCH1']	['C3orf33', 'AC104472.3', 'SLC33A1', 'GMPS', 'KCNAB1']	PLCH1
59	20	TATTCAATTATACTTCCGCA	98	0.00418324	28	0.0522788	12.4972	chr4: 109454977	protein_coding: SEC24B	2	['RPL34', 'OSTC', 'ETNPPL', 'COL25A1', 'SEC24B']	['MCUB', 'CASP6', 'PLA2G12A', 'AC126283.2', 'CFI']	SEC24B
62	21	TAAAGGCTATGACCACCCAG	479	0.0204466	46	0.0858866	4.20052	chr8: 86495497	protein_coding: RMDN1	2	['ATP6V0D2', 'PSKH2', 'SLC7A13', 'WWP1', 'RMDN1']	['CPNE3', 'CNGB3', 'CNBD1', 'DCAF4L2', 'MMP16']	RMDN1
64	22	CCAGGCCCCCGGTATACCCG	524	0.0223675	36	0.0672156	3.00505	chr5: 1395570	protein_coding: SLC6A3	2	['SLC6A18', 'TERT', 'CLPTM1L', 'AC026748.1', 'SLC6A3']	['LPCAT1', 'MRPL36', 'NDUFS6', 'AC025183.4', 'IRX4']	SLC6A3
66	23	TGAAAAGAACATCTACAGAG	411	0.017544	24	0.0448104	2.55417	chr5: 1395570	protein_coding: SLC6A3	2	['SLC6A18', 'TERT', 'CLPTM1L', 'AC026748.1', 'SLC6A3']	['LPCAT1', 'MRPL36', 'NDUFS6', 'AC025183.4', 'IRX4']	SLC6A3
67	23	TGAAAAGAACATCTACAGAG	411	0.017544	24	0.0448104	2.55417	chr3: 136056779	protein_coding: PPP2R3A	2	['ANAPC13', 'CEP63', 'EPHB1', 'KY', 'PPP2R3A']	['MSL2', 'PCCB', 'STAG1', 'SLC35G2', 'NCK1']	PPP2R3A
68	23	TGAAAAGAACATCTACAGAG	411	0.017544	24	0.0448104	2.55417	chr5: 143071985	protein_coding: ARHGAP26	2	['AC091825.1', 'SPRY4', 'FGF1', 'ARHGAP26', 'AC008533.1']	['NR3C1', 'AC091925.2', 'AC091925.1', 'HMHB1', 'YIPF5']	ARHGAP26
70	23	TGAAAAGAACATCTACAGAG	411	0.017544	24	0.0448104	2.55417	chr6: 143729279	protein_coding: PHACTR2	2	['AIG1', 'ADAT2', 'PEX3', 'FUCA2', 'PHACTR2']	['AL049844.1', 'LTV1', 'AL049844.3', 'ZC2HC1B', 'PLAGL1']	PHACTR2
72	24	CTAATACTTAGGAAGCCAAG	299	0.0127631	53	0.0989563	7.75328	chr12: 62909025	protein_coding: PPM1H	2	['SLC16A7', 'FAM19A2', 'USP15', 'MON2', 'PPM1H']	['AVPR1A', 'AC135584.1', 'DPY19L2', 'RXYLT1', 'SRGAP1']	PPM1H
73	24	CTAATACTTAGGAAGCCAAG	299	0.0127631	53	0.0989563	7.75328	chr5: 84213945	protein_coding: EDIL3	2	['TMEM167A', 'XRCC4', 'VCAN', 'HAPLN1', 'EDIL3']	['AC020923.1', 'COX7C', 'RASA1', 'CCNH', 'TMEM161B']	EDIL3
74	24	CTAATACTTAGGAAGCCAAG	299	0.0127631	53	0.0989563	7.75328	chr7: 69741914	protein_coding: AUTS2	2	['RABGEF1', 'TMEM248', 'SBDS', 'TYW1', 'AUTS2']	['GALNT17', 'CALN1', 'TYW1B', 'POM121', 'TRIM74']	AUTS2
77	25	TGATTTACTTACTTTTGGGG	185	0.00789693	17	0.0317407	4.01937	chr12: 2349885	protein_coding: CACNA1C	2	['ADIPOR2', 'CACNA2D4', 'LRTM2', 'DCP1B', 'CACNA1C']	['FKBP4', 'ITFG2', 'NRIP2', 'TEX52', 'FOXM1']	CACNA1C
78	25	TGATTTACTTACTTTTGGGG	185	0.00789693	17	0.0317407	4.01937	chr10: 71998135	protein_coding: CHST3	2	['CDH23', 'C10orf105', 'VSIR', 'PSAP', 'CHST3']	['SPOCK2', 'ASCC1', 'ANAPC16', 'DDIT4', 'DNAJB12']	CHST3
85	28	CGGGTTCATATTCCAACGGG	635	0.0271057	57	0.106425	3.92629	chr5: 168344728	protein_coding: WWC1	2	['HMMR', 'MAT2B', 'TENM2', 'AC011369.2', 'WWC1']	['RARS', 'FBLL1', 'PANK3', 'SLIT3', 'AC011389.3']	WWC1
95	33	GCACTTGTAGCGGCGTTAAA	461	0.0196783	28	0.0522788	2.65667	chr6: 149921016	protein_coding: RAET1G	2	['NUP43', 'PCMT1', 'LRP11', 'RAET1E', 'RAET1G']	['ULBP2', 'ULBP1', 'RAET1L', 'ULBP3', 'PPP1R14C']	RAET1G
103	37	GCGACTCTCCAAAAGCGCAA	371	0.0158365	33	0.0616143	3.89064	chr10: 89411671	protein_coding: LIPA	2	['LIPA', 'IFIT2', 'IFIT3', 'IFIT1B', 'IFIT1']	['IFIT5', 'SLC16A12', 'PANK1', 'KIF20B', 'HTR7']	LIPA
107	39	TGGGGCCCTCTATTGCTGAG	486	0.0207454	48	0.0896208	4.32002	chr5: 134925738	processed_pseudogene: MTND5P11, protein_coding: PCBD2	2	['DDX46', 'C5orf24', 'TXNDC15', 'PCBD2', 'AC006077.2']	['CATSPER3', 'PITX1', 'H2AFY', 'DCANP1', 'TIFAB']	PCBD2
117	43	TAGACCCACTTTCTTCCCAG	292	0.0124643	17	0.0317407	2.54652	chr1: 3136108	protein_coding: PRDM16	2	['FAM213B', 'MMEL1', 'TTC34', 'ACTRT2', 'PRDM16']	['AL512383.1', 'ARHGEF16', 'MEGF6', 'TPRG1L', 'WRAP73']	PRDM16
121	44	TCTATTCCTTACCAGTAAAG	165	0.00704321	17	0.0317407	4.50657	chr1: 216504883	protein_coding: ESRRG	2	['CENPF', 'KCNK2', 'KCTD3', 'USH2A', 'ESRRG']	['GPATCH2', 'SPATA17', 'RRP15', 'TGFB2', 'TGFB2-OT1']	ESRRG
122	44	TCTATTCCTTACCAGTAAAG	165	0.00704321	17	0.0317407	4.50657	chr7: 112204523	protein_coding: DOCK4	2	['DNAJB9', 'AC004014.2', 'IMMP2L', 'LRRN3', 'DOCK4']	['ZNF277', 'IFRD1', 'LSMEM1', 'TMEM168', 'BMT2']	DOCK4
125	45	AATAGGGCTCCTATAACACA	434	0.0185258	24	0.0448104	2.41881	chr14: 23008690	protein_coding: C14orf93	2	['HAUS4', 'AL132780.3', 'AJUBA', 'C14orf93', 'AL132780.5']	['PSMB5', 'AL132780.4', 'PSMB11', 'CDH24', 'ACIN1']	C14orf93
131	48	TTTAAGAACATATTAATCGG	245	0.0104581	25	0.0466775	4.46329	chr17: 28404283	protein_coding: SLC46A1	2	['AC002094.3', 'SARM1', 'VTN', 'AC002094.5', 'SLC46A1']	['AC005726.1', 'SLC13A2', 'FOXN1', 'UNC119', 'PIGS']	SLC46A1
135	50	CCTACAAATGCTCCTTGGCA	621	0.0265081	57	0.106425	4.0148	chr8: 50041188	protein_coding: SNTG1	2	['AC041040.1', 'EFCAB1', 'SNAI2', 'PPDPFL', 'SNTG1']	['PXDNL', 'PCMTD1', 'ST18', 'ALKAL1', 'RB1CC1']	SNTG1
137	51	TATACCTTTCCCACGTCCAA	155	0.00661635	24	0.0448104	6.77268	chr11: 77628208	protein_coding: CLNS1A	2	['MYO7A', 'GDPD4', 'PAK1', 'CLNS1A', 'AQP11']	['RSF1', 'AAMDC', 'INTS4', 'KCTD14', 'NDUFC2-KCTD14']	CLNS1A
139	52	CGGGATCTCTGCAAGCCAGA	595	0.0253982	29	0.0541459	2.13188	chr17: 79163474	protein_coding: RBFOX3	2	['LGALS3BP', 'CANT1', 'C1QTNF1', 'ENGASE', 'RBFOX3']	['ENPP7', 'CBX2', 'CBX8', 'CBX4', 'TBC1D16']	RBFOX3
147	56	TCTAAGTCCACACAGTCAAA	323	0.0137876	22	0.0410762	2.97921	chr12: 102127845	protein_coding: PARPBP	2	['GNPTAB', 'DRAM1', 'WASHC3', 'NUP37', 'PARPBP']	['PMCH', 'IGF1', 'PAH', 'ASCL1', 'C12orf42']	PARPBP
151	58	CAGCACGAACCAGATTAGAG	1075	0.0458876	57	0.106425	2.31925	chr1: 41119859	protein_coding: SCMH1	2	['KCNQ4', 'CITED4', 'CTPS1', 'SLFNL1', 'SCMH1']	['FOXO6', 'EDN2', 'HIVEP3', 'AC119676.1', 'GUCA2B']	SCMH1
154	59	CGGCCTCTCATGCCTTGGCA	621	0.0265081	35	0.0653485	2.46523	chr10: 32981788	lincRNA: ITGB1-DT, protein_coding: ITGB1	2	['ARHGAP12', 'KIF5B', 'EPC1', 'CCDC7', 'ITGB1']	['NRP1', 'PARD3', 'CUL2', 'CREM', 'CCNY']	ITGB1
156	60	AGTGAAAACCTACCACACCA	387	0.0165195	23	0.0429433	2.59955	chr12: 59630177	protein_coding: SLC16A7	2	['ATP23', 'AC090643.1', 'AC090643.2', 'LRIG3', 'SLC16A7']	['FAM19A2', 'USP15', 'MON2', 'PPM1H', 'AVPR1A']	SLC16A7
159	61	CTGCCTGCTGGCTCAAAGCA	528	0.0225383	54	0.100823	4.47343	chr10: 113850560	protein_coding: DCLRE1A	2	['HABP2', 'NRAP', 'CASP7', 'PLEKHS1', 'DCLRE1A']	['NHLRC2', 'ADRB1', 'CCDC186', 'TDRD1', 'VWA2']	DCLRE1A
163	63	CCTTTAGTTCTAACAATGAA	659	0.0281301	36	0.0672156	2.38945	chr1: 89013139	protein_coding: GBP3	2	['PKN2', 'GTF2B', 'KYAT3', 'RBMXL1', 'GBP3']	['GBP1', 'GBP2', 'GBP7', 'GBP4', 'GBP5']	GBP3
165	64	CTGAGAAAACTCCAGTCCAG	506	0.0215992	46	0.0858866	3.97638	chr3: 169093610	protein_coding: MECOM	2	['WDR49', 'PDCD10', 'SERPINI1', 'GOLIM4', 'MECOM']	['ACTRT3', 'MYNN', 'LRRC34', 'LRRIQ4', 'LRRC31']	MECOM
166	64	CTGAGAAAACTCCAGTCCAG	506	0.0215992	46	0.0858866	3.97638	chr2: 9229295	protein_coding: ASAP2	2	['RNF144A', 'ID2', 'KIDINS220', 'MBOAT2', 'ASAP2']	['ITGB1BP1', 'CPSF3', 'IAH1', 'ADAM17', 'YWHAQ']	ASAP2
182	68	ATTTATAAAATCAAAAAGAG	103	0.00439667	5	0.0093355	2.12331	chr3: 59775502	protein_coding: FHIT	2	['ACOX2', 'FAM107A', 'FAM3D', 'C3orf67', 'FHIT']	['PTPRG', 'C3orf14', 'FEZF2', 'CADPS', 'SYNPR']	FHIT
189	71	CTGGCCCCCAAATCAATACA	546	0.0233066	75	0.140032	6.00827	chr7: 140331848	protein_coding: SLC37A3	2	['TBXAS1', 'PARP12', 'KDM7A', 'KDM7A-DT', 'SLC37A3']	['RAB19', 'MKRN1', 'DENND2A', 'ADCK2', 'NDUFB2']	SLC37A3
191	72	TGAAACCGTCCTGCATTAAG	374	0.0159646	70	0.130697	8.18667	chr17: 9365346	protein_coding: STX8	2	['MFSD6L', 'PIK3R6', 'PIK3R5', 'NTN1', 'STX8']	['CFAP52', 'USP43', 'DHRS7C', 'GSG1L2', 'GLP2R']	STX8
194	73	TGAATGCCAAAGGCACCAGG	404	0.0172452	26	0.0485446	2.81497	chr22: 35729051	protein_coding: APOL5	2	['MCM5', 'RASD2', 'MB', 'APOL6', 'APOL5']	['RBFOX2', 'Z95114.3', 'APOL3', 'APOL4', 'APOL2']	APOL5
200	76	AGTCTGGTACCAATATCCAA	231	0.00986049	15	0.0280065	2.84027	chr14: 32671632	protein_coding: AKAP6	2	['DTD2', 'GPR33', 'NUBPL', 'ARHGAP5', 'AKAP6']	['AL049781.1', 'NPAS3', 'EGLN3', 'SPTSSA', 'EAPP']	AKAP6
203	77	TCTTCTCCCATGACTCACAG	228	0.00973243	25	0.0466775	4.79608	chr22: 43446344	protein_coding: MPPED1	2	['MCAT', 'TSPO', 'TTLL12', 'SCUBE1', 'MPPED1']	['EFCAB6', 'SULT4A1', 'PNPLA5', 'PNPLA3', 'SAMM50']	MPPED1
205	78	CAATTCCTTTGCGATACAAA	353	0.0150682	18	0.0336078	2.23038	chr2: 45968602	protein_coding: PRKCE	2	['AC012354.3', 'SIX3', 'SIX2', 'SRBD1', 'PRKCE']	['EPAS1', 'TMEM247', 'ATP6V1E2', 'RHOQ', 'PIGF']	PRKCE
209	80	CTTTACTCATTACCAAGCCA	231	0.00986049	19	0.0354749	3.59768	chr15: 58232096	protein_coding: ALDH1A2	2	['GCOM1', 'MYZAP', 'POLR2M', 'ALDH1A2', 'AQP9']	['LIPC', 'ADAM10', 'MINDY2', 'RNF111', 'SLTM']	ALDH1A2
211	81	GCTACCGGATAAGAGTCCAG	800	0.0341489	109	0.203514	5.95961	chr12: 132797033	protein_coding: GOLGA3	2	['PXMP2', 'AC135586.2', 'PGAM5', 'ANKLE2', 'GOLGA3']	['CHFR', 'AC127070.4', 'ZNF605', 'ZNF26', 'ZNF84']	GOLGA3
213	82	CTATCAGCAGTCCATTTCCA	441	0.0188246	21	0.0392091	2.08287	chr5: 135386659	protein_coding: H2AFY	2	['PCBD2', 'AC006077.2', 'CATSPER3', 'PITX1', 'H2AFY']	['DCANP1', 'TIFAB', 'NEUROG1', 'CXCL14', 'SLC25A48']	H2AFY
217	83	CTATCTCCCTCTTCATCACA	247	0.0105435	32	0.0597472	5.66675	chr20: 49831124	protein_coding: SLC9A8	2	['ZNFX1', 'KCNB1', 'PTGIS', 'B4GALT5', 'SLC9A8']	['SPATA2', 'RNF114', 'SNAI1', 'UBE2V1', 'TMEM189-UBE2V1']	SLC9A8
220	84	CCGCACAAACCAGATTAGAG	1007	0.0429849	120	0.224052	5.21234	chr1: 41119859	protein_coding: SCMH1	2	['KCNQ4', 'CITED4', 'CTPS1', 'SLFNL1', 'SCMH1']	['FOXO6', 'EDN2', 'HIVEP3', 'AC119676.1', 'GUCA2B']	SCMH1
222	85	CCTTCCCCACTTCCTCGACA	179	0.00764081	20	0.037342	4.88718	chr3: 186616558	protein_coding: AHSG, antisense: AC068631.1	2	['CRYGS', 'TBCCD1', 'DNAJB11', 'AC068631.2', 'AHSG']	['FETUB', 'HRG', 'KNG1', 'EIF4A2', 'RFC4']	AHSG
225	86	AAATCAAGATCTTAACAAAA	425	0.0181416	22	0.0410762	2.2642	chr9: 130743009	protein_coding: ABL1	2	['ASS1', 'FUBP3', 'PRDM12', 'EXOSC2', 'ABL1']	['QRFP', 'FIBCD1', 'LAMC3', 'AIF1L', 'NUP214']	ABL1
226	86	AAATCAAGATCTTAACAAAA	425	0.0181416	22	0.0410762	2.2642	chr20: 25571913	protein_coding: NINL	2	['AL035252.4', 'PYGB', 'ABHD12', 'GINS1', 'NINL']	['NANP', 'ZNF337', 'FAM182B', 'DEFB115', 'DEFB116']	NINL
228	87	CCTACAATTACTCCTTGGCA	591	0.0252275	50	0.093355	3.70053	chr15: 47673152	protein_coding: SEMA6D	2	['BLOC1S6', 'AC090527.2', 'SQOR', 'AC066615.1', 'SEMA6D']	['SLC24A5', 'MYEF2', 'CTXN2', 'SLC12A1', 'DUT']	SEMA6D
232	89	AATTGTCCTGCTCTATTAGA	155	0.00661635	15	0.0280065	4.23293	chr15: 85095745	protein_coding: PDE8A	2	['SEC11A', 'ZNF592', 'ALPK3', 'SLC28A1', 'PDE8A']	['AKAP13', 'KLHL25', 'AGBL1', 'NTRK3', 'MRPL46']	PDE8A
234	90	ACATAAAACAAACCAAACAG	394	0.0168183	56	0.104558	6.21689	chr5: 54206069	protein_coding: ARL15	2	['ITGA2', 'MOCS2', 'FST', 'NDUFS4', 'ARL15']	['AC008873.1', 'HSPB3', 'SNX18', 'AC016583.1', 'ESM1']	ARL15
236	90	ACATAAAACAAACCAAACAG	394	0.0168183	56	0.104558	6.21689	chr11: 90142746	protein_coding: NAALAD2	2	['TRIM64', 'TRIM49C', 'UBTFL1', 'AP000648.2', 'NAALAD2']	['AP000648.3', 'CHORDC1', 'AP002364.1', 'AP002782.1', 'AP001002.3']	NAALAD2
243	93	ACTTTTCCTTACCAGTAAAG	275	0.0117387	22	0.0410762	3.49922	chr6: 41821463	protein_coding: USP49	2	['FRS3', 'AL365205.1', 'PRICKLE4', 'TOMM6', 'USP49']	['MED20', 'BYSL', 'CCND3', 'TAF8', 'C6orf132']	USP49
245	94	CTTGCCATCCCGCATCCAGG	455	0.0194222	41	0.0765511	3.94143	chr3: 50633650	protein_coding: MAPKAPK3	2	['CACNA2D2', 'C3orf18', 'HEMK1', 'CISH', 'MAPKAPK3']	['DOCK3', 'MANF', 'RBM15B', 'DCAF1', 'RAD54L2']	MAPKAPK3
250	96	CTGAGCAAACTCCAATCCAG	654	0.0279167	31	0.0578801	2.07331	chr2: 9229295	protein_coding: ASAP2	2	['RNF144A', 'ID2', 'KIDINS220', 'MBOAT2', 'ASAP2']	['ITGB1BP1', 'CPSF3', 'IAH1', 'ADAM17', 'YWHAQ']	ASAP2
254	97	CTTCTCATTTACAAGTACGG	304	0.0129766	29	0.0541459	4.17259	chr2: 70536066	protein_coding: TGFA	2	['TIA1', 'PCYOX1', 'SNRPG', 'FAM136A', 'TGFA']	['ADD2', 'FIGLA', 'CLEC4F', 'CD207', 'VAX2']	TGFA
262	101	ATAGCCCTCACTAATAGGAG	281	0.0119948	13	0.0242723	2.02357	chr8: 108754961	protein_coding: TMEM74	2	['ANGPT1', 'RSPO2', 'EIF3E', 'EMC2', 'TMEM74']	['TRHR', 'NUDCD1', 'ENY2', 'PKHD1L1', 'EBAG9']	TMEM74
265	102	GGGAGCCTCCTTGCGCTACA	449	0.0191661	42	0.0784182	4.09151	chr6: 149230724	protein_coding: TAB2, lincRNA: AL031056.1	2	['STXBP5', 'SAMD5', 'SASH1', 'UST', 'TAB2']	['SUMO4', 'ZC3H12D', 'PPIL4', 'GINM1', 'KATNA1']	TAB2
267	103	CCAAAGGCAGTGCAGCTCAG	451	0.0192514	22	0.0410762	2.13367	chr7: 92394036	protein_coding: ANKIB1	2	['AKAP9', 'CYP51A1', 'LRRD1', 'KRIT1', 'ANKIB1']	['GATAD1', 'ERVW-1', 'PEX1', 'RBM48', 'FAM133B']	ANKIB1
269	103	CCAAAGGCAGTGCAGCTCAG	451	0.0192514	22	0.0410762	2.13367	chr9: 113936156	protein_coding: ZNF618	2	['POLE3', 'C9orf43', 'RGS3', 'AL162727.3', 'ZNF618']	['AMBP', 'KIF12', 'COL27A1', 'ORM1', 'ORM2']	ZNF618
276	105	TGGCAGAATTATTTGTAACA	434	0.0185258	21	0.0392091	2.11646	chr17: 42093181	protein_coding: ZNF385C	2	['CNP', 'DNAJC7', 'NKIRAS2', 'ZNF385C', 'C17orf113']	['DHX58', 'KAT2A', 'AC099811.2', 'HSPB9', 'RAB5C']	ZNF385C
279	106	ACACAGTAACCCCCTAAGAA	645	0.0275325	43	0.0802853	2.91602	chr22: 24063890	protein_coding: CABIN1	2	['DDTL', 'DDT', 'GSTT2', 'GSTT4', 'CABIN1']	['SUSD2', 'GGT5', 'SPECC1L', 'SPECC1L-ADORA2A', 'ADORA2A']	CABIN1
282	107	ACTACTGAAAGTACGAGCAA	512	0.0218553	37	0.0690827	3.16092	chrX: 27734164	protein_coding: DCAF8L2	2	['MAGEB6B', 'MAGEB6', 'MAGEB5', 'PPP4R3C', 'DCAF8L2']	['MAGEB10', 'DCAF8L1', 'IL1RAPL1', 'MAGEB2', 'MAGEB3']	DCAF8L2
284	108	AGACTACCCTGAAATTTACA	272	0.0116106	17	0.0317407	2.73376	chr12: 77705430	protein_coding: NAV3	2	['OSBPL8', 'ZDHHC17', 'CSRP2', 'E2F7', 'NAV3']	['SYT1', 'PAWR', 'PPP1R12A', 'PPP1R12A-AS1', 'OTOGL']	NAV3
288	110	GTGCACATATGGGCTAGGCG	905	0.0386309	46	0.0858866	2.22326	chr6: 35461311	protein_coding: FANCE	2	['SCUBE3', 'ZNF76', 'DEF6', 'PPARD', 'FANCE']	['RPL10A', 'TEAD3', 'TULP1', 'FKBP5', 'ARMC12']	FANCE
290	111	GCTGGGAACCTGGCTATAAA	494	0.0210869	41	0.0765511	3.63026	chr8: 123088319	protein_coding: TBC1D31	2	['SNTB1', 'HAS2', 'ZHX2', 'DERL1', 'TBC1D31']	['FAM83A', 'C8orf76', 'ZHX1-C8orf76', 'ZHX1', 'ATAD2']	TBC1D31
298	114	CCAGGGATACAAATGCCCAG	1150	0.049089	101	0.188577	3.84153	chr1: 17779163	protein_coding: ACTL8	2	['PADI4', 'PADI6', 'RCC2', 'ARHGEF10L', 'ACTL8']	['IGSF21', 'AL365209.1', 'KLHDC7A', 'PAX7', 'TAS1R2']	ACTL8
302	116	CCTCATGAAGAACCAATACG	613	0.0261666	39	0.0728169	2.78282	chr3: 191222147	antisense: OSTN-AS1, protein_coding: OSTN	2	['CLDN16', 'TMEM207', 'IL1RAP', 'GMNC', 'OSTN']	['UTS2B', 'CCDC50', 'PYDC2', 'FGF12', 'MB21D2']	OSTN
305	117	GGACCCATAACTACTCGGGG	475	0.0202759	56	0.104558	5.15674	chr7: 128939209	protein_coding: IRF5	2	['FLNC', 'KCP', 'ATP6V1F', 'ATP6V1FNB', 'IRF5']	['AC025594.2', 'TNPO3', 'AC011005.1', 'TSPAN33', 'SMO']	IRF5
308	118	GTAACTCCCCCAGATTAAAG	173	0.0073847	32	0.0597472	8.09068	chr12: 103715021	protein_coding: STAB2	2	['IGF1', 'PAH', 'ASCL1', 'C12orf42', 'STAB2']	['NT5DC3', 'HSP90B1', 'C12orf73', 'TDG', 'GLT8D2']	STAB2
315	120	GGGCAAGGTGCACATCCCAA	519	0.0221541	67	0.125096	5.64662	chr6: 150832199	protein_coding: PLEKHG1	2	['RAET1L', 'ULBP3', 'PPP1R14C', 'IYD', 'PLEKHG1']	['MTHFD1L', 'AKAP12', 'ZBTB2', 'RMND1', 'ARMT1']	PLEKHG1
317	121	TAATACCTAGTAGTACTAGA	283	0.0120802	14	0.0261394	2.16383	chr6: 150832199	protein_coding: PLEKHG1	2	['RAET1L', 'ULBP3', 'PPP1R14C', 'IYD', 'PLEKHG1']	['MTHFD1L', 'AKAP12', 'ZBTB2', 'RMND1', 'ARMT1']	PLEKHG1
321	123	GCTTTAGACAAAGTTCTGAA	343	0.0146413	18	0.0336078	2.29541	chr16: 4045089	protein_coding: ADCY9	2	['SLX4', 'DNASE1', 'TRAP1', 'CREBBP', 'ADCY9']	['SRL', 'TFAP4', 'GLIS2', 'PAM16', 'CORO7-PAM16']	ADCY9
326	125	GTACTCATATTTCCTCAGGG	249	0.0106288	15	0.0280065	2.63495	chr1: 65370083	protein_coding: DNAJC6	2	['CACHD1', 'RAVER2', 'JAK1', 'AK4', 'DNAJC6']	['LEPROT', 'LEPR', 'PDE4B', 'SGIP1', 'TCTEX1D1']	DNAJC6
328	126	GAAACGCACAACACTCAGCA	674	0.0287704	61	0.113893	3.95869	chr1: 65370083	protein_coding: DNAJC6	2	['CACHD1', 'RAVER2', 'JAK1', 'AK4', 'DNAJC6']	['LEPROT', 'LEPR', 'PDE4B', 'SGIP1', 'TCTEX1D1']	DNAJC6
329	126	GAAACGCACAACACTCAGCA	674	0.0287704	61	0.113893	3.95869	chr11: 62146286	protein_coding: INCENP	2	['RAB3IL1', 'BEST1', 'FTH1', 'AP003733.4', 'INCENP']	['SCGB1D1', 'SCGB2A1', 'SCGB1D2', 'SCGB2A2', 'SCGB1D4']	INCENP
331	127	CTTTTTCCCTTACTGATGAA	122	0.0052077	7	0.0130697	2.50969	chr4: 172657013	protein_coding: GALNTL6	2	['CLCN3', 'HPF1', 'MFAP3L', 'AADAT', 'GALNTL6']	['GALNT7', 'HMGB2', 'SAP30', 'SCRG1', 'HAND2']	GALNTL6
333	128	TTTTATGATAACACTTTGGG	245	0.0104581	26	0.0485446	4.64182	chr6: 149043364	protein_coding: UST	2	['ADGB', 'STXBP5', 'SAMD5', 'SASH1', 'UST']	['TAB2', 'SUMO4', 'ZC3H12D', 'PPIL4', 'GINM1']	UST
334	128	TTTTATGATAACACTTTGGG	245	0.0104581	26	0.0485446	4.64182	chr6: 56941734	protein_coding: DST	2	['GFRAL', 'HMGCLL1', 'BMP5', 'COL21A1', 'DST']	['BEND6', 'KIAA1586', 'ZNF451', 'BAG2', 'RAB23']	DST
336	128	TTTTATGATAACACTTTGGG	245	0.0104581	26	0.0485446	4.64182	chr6: 161567301	protein_coding: PRKN	2	['PLG', 'MAP3K4', 'AGPAT4', 'AGPAT4-IT1', 'PRKN']	['PACRG', 'QKI', 'C6orf118', 'PDE10A', 'TBXT']	PRKN
342	129	TCTGAATCTTTGGTTCACCG	214	0.00913483	17	0.0317407	3.47469	chr15: 48469213	protein_coding: FBN1	2	['MYEF2', 'CTXN2', 'SLC12A1', 'DUT', 'FBN1']	['CEP152', 'SHC4', 'EID1', 'SECISBP2L', 'COPS2']	FBN1
347	131	GAACCTAGCATTTATTTGAA	340	0.0145133	19	0.0354749	2.44431	chr17: 81635498	protein_coding: NPLOC4	2	['AC110285.7', 'ACTG1', 'FSCN2', 'FAAP100', 'NPLOC4']	['TSPAN10', 'PDE6G', 'OXLD1', 'CCDC137', 'ARL16']	NPLOC4
348	131	GAACCTAGCATTTATTTGAA	340	0.0145133	19	0.0354749	2.44431	chr4: 127637323	protein_coding: INTU	2	['SPATA5', 'SPRY1', 'ANKRD50', 'FAT4', 'INTU']	['SLC25A31', 'HSPA4L', 'PLK4', 'MFSD8', 'ABHD18']	INTU
349	131	GAACCTAGCATTTATTTGAA	340	0.0145133	19	0.0354749	2.44431	chr3: 79387914	protein_coding: ROBO1	2	['CNTN3', 'FRG2C', 'ZNF717', 'ROBO2', 'ROBO1']	['GBE1', 'CADM2', 'VGLL3', 'CHMP2B', 'POU1F1']	ROBO1
354	133	CCTTAGGCAGGGCTTCTGAA	550	0.0234774	50	0.093355	3.97638	chr10: 103282011	protein_coding: INA	2	['AS3MT', 'CNNM2', 'NT5C2', 'RPEL1', 'INA']	['PCGF6', 'TAF5', 'ATP5MD', 'PDCD11', 'CALHM2']	INA
362	136	TGGTTTGGAGGCAAGTGACA	342	0.0145986	20	0.037342	2.55791	chr10: 74198552	protein_coding: ADK	2	['PLAU', 'C10orf55', 'VCL', 'AP3M1', 'ADK']	['KAT6B', 'DUPD1', 'DUSP13', 'SAMD8', 'VDAC2']	ADK
364	137	CAATTGCCCATTGTTAGACA	628	0.0268069	29	0.0541459	2.01985	chr11: 86617582	antisense: AP001831.1, protein_coding: ME3	2	['EED', 'HIKESHI', 'CCDC81', 'AP001148.1', 'ME3']	['PRSS23', 'AP001528.3', 'FZD4', 'TMEM135', 'AP002967.1']	ME3
370	139	CAGGGAAACTGCGCTTGACA	875	0.0373503	54	0.100823	2.6994	chr10: 99940792	protein_coding: DNMBP, antisense: DNMBP-AS1	2	['ENTPD7', 'CUTC', 'COX15', 'ABCC2', 'DNMBP']	['CPN1', 'ERLIN1', 'CHUK', 'CWF19L1', 'BLOC1S2']	DNMBP
372	140	TAAAGCCCATAACTTCCCCA	494	0.0210869	63	0.117627	5.57821	chr18: 3633048	protein_coding: DLGAP1	2	['MYOM1', 'MYL12A', 'MYL12B', 'TGIF1', 'DLGAP1']	['AKAIN1', 'ZBTB14', 'EPB41L3', 'TMEM200C', 'L3MBTL4']	DLGAP1
375	141	CATAATATAAAAGTATTGAG	645	0.0275325	37	0.0690827	2.50913	chr18: 23764239	protein_coding: LAMA3	2	['RIOK3', 'RMC1', 'NPC1', 'ANKRD29', 'LAMA3']	['TTC39C', 'AC090772.4', 'CABYR', 'OSBPL1A', 'IMPACT']	LAMA3
377	142	CAGCCTCGATAACAGAGGCG	1110	0.0473816	88	0.164305	3.46769	chr7: 64683066	protein_coding: ZNF107, processed_pseudogene: BNIP3P11	2	['ZNF735', 'ZNF679', 'ZNF736', 'ZNF680', 'ZNF107']	['ZNF138', 'ZNF273', 'ZNF117', 'ERV3-1', 'ZNF92']	ZNF107
383	145	CCTGCTCCTGGTGATATGGG	705	0.0300937	49	0.0914879	3.0401	chr8: 120445481	protein_coding: MTBP	2	['AC021945.1', 'DEPTOR', 'COL14A1', 'MRPL13', 'MTBP']	['SNTB1', 'HAS2', 'ZHX2', 'DERL1', 'TBC1D31']	MTBP
385	145	CCTGCTCCTGGTGATATGGG	705	0.0300937	49	0.0914879	3.0401	chr20: 32138892	protein_coding: TM9SF4	2	['PDRG1', 'XKR7', 'CCM2L', 'HCK', 'TM9SF4']	['PLAGL2', 'POFUT1', 'KIF3B', 'ASXL1', 'NOL4L']	TM9SF4
387	146	CCTACCCCACCAAAATCCCA	551	0.02352	32	0.0597472	2.54027	chr11: 131562516	antisense: AP003025.1, protein_coding: NTM	2	['ZBTB44', 'ADAMTS8', 'ADAMTS15', 'SNX19', 'NTM']	['AP000843.1', 'OPCML', 'AP003784.1', 'AP004782.1', 'AP003972.1']	NTM
388	146	CCTACCCCACCAAAATCCCA	551	0.02352	32	0.0597472	2.54027	chr11: 72191212	protein_coding: FOLR1, antisense: AP000812.1	2	['LAMTOR1', 'AP000812.4', 'ANAPC15', 'FOLR3', 'FOLR1']	['FOLR2', 'INPPL1', 'PHOX2A', 'CLPB', 'PDE2A']	FOLR1
394	147	AATGTAACTTCTGTGAAAAG	473	0.0201905	31	0.0578801	2.8667	chr6: 96949151	protein_coding: KLHL32	2	['UFL1', 'FHL5', 'GPR63', 'NDUFAF4', 'KLHL32']	['MMS22L', 'POU3F2', 'FBXL4', 'FAXC', 'COQ3']	KLHL32
395	147	AATGTAACTTCTGTGAAAAG	473	0.0201905	31	0.0578801	2.8667	chr11: 10686968	protein_coding: MRVI1	2	['AMPD3', 'MTRNR2L8', 'RNF141', 'LYVE1', 'MRVI1']	['CTR9', 'EIF4G2', 'ZBED5', 'GALNT18', 'CSNK2A3']	MRVI1
397	148	CTTCCTTTACCCAATTCAGA	217	0.00926288	12	0.0224052	2.41881	chr10: 95880798	antisense: ENTPD1-AS1, protein_coding: AL365273.2	2	['SORBS1', 'ALDH18A1', 'TCTN3', 'ENTPD1', 'AL365273.2']	['CC2D2B', 'CCNJ', 'ZNF518A', 'BLNK', 'DNTT']	AL365273.2
399	149	AGACTACCCTGAAATTAACA	483	0.0206174	28	0.0522788	2.53567	chr10: 95880798	antisense: ENTPD1-AS1, protein_coding: AL365273.2	2	['SORBS1', 'ALDH18A1', 'TCTN3', 'ENTPD1', 'AL365273.2']	['CC2D2B', 'CCNJ', 'ZNF518A', 'BLNK', 'DNTT']	AL365273.2
404	151	ACACAGTCATGCTCTCACGA	995	0.0424727	57	0.106425	2.50572	chr1: 149001035	protein_coding: PDE4DIP	2	['AC245100.8', 'PPIAL4G', 'NBPF14', 'NUDT4B', 'PDE4DIP']	['NBPF9', 'NBPF19', 'PPIAL4C', 'FCGR1A', 'HIST2H2BF']	PDE4DIP
411	154	CTGAGCAAACTACAGTCCAG	461	0.0196783	74	0.138165	7.02121	chr2: 9229295	protein_coding: ASAP2	2	['RNF144A', 'ID2', 'KIDINS220', 'MBOAT2', 'ASAP2']	['ITGB1BP1', 'CPSF3', 'IAH1', 'ADAM17', 'YWHAQ']	ASAP2
413	154	CTGAGCAAACTACAGTCCAG	461	0.0196783	74	0.138165	7.02121	chr20: 52070919	protein_coding: ZFP64	2	['AL121785.1', 'NFATC2', 'ATP9A', 'SALL4', 'ZFP64']	['TSHZ2', 'ZNF217', 'BCAS1', 'CYP24A1', 'PFDN4']	ZFP64
414	154	CTGAGCAAACTACAGTCCAG	461	0.0196783	74	0.138165	7.02121	chr2: 62982408	protein_coding: EHBP1	2	['CCT4', 'COMMD1', 'B3GNT2', 'TMEM17', 'EHBP1']	['OTX1', 'WDPCP', 'AC016734.2', 'MDH1', 'UGP2']	EHBP1
415	154	CTGAGCAAACTACAGTCCAG	461	0.0196783	74	0.138165	7.02121	chr6: 42289745	protein_coding: TRERF1	2	['GUCA1A', 'AL096814.1', 'GUCA1B', 'MRPS10', 'TRERF1']	['UBR2', 'PRPH2', 'TBCC', 'BICRAL', 'RPL7L1']	TRERF1
417	155	GCAGACCTTTGGTCTTCAAG	229	0.00977512	12	0.0224052	2.29206	chr17: 69512972	protein_coding: MAP2K6	2	['ABCA10', 'AC005495.1', 'ABCA5', 'MAP2K6', 'AC015920.1']	['KCNJ16', 'KCNJ2', 'SOX9', 'SLC39A11', 'SSTR2']	MAP2K6
423	157	CTTCCGCCCTCGGCTTGGCA	266	0.0113545	15	0.0280065	2.46655	chr7: 142929674	protein_coding: TRPV5	2	['TRBC2', 'TRBV30', 'EPHB6', 'TRPV6', 'TRPV5']	['LLCFC1', 'KEL', 'OR9A2', 'OR6V1', 'PIP']	TRPV5
424	157	CTTCCGCCCTCGGCTTGGCA	266	0.0113545	15	0.0280065	2.46655	chr9: 4093437	protein_coding: GLIS3	2	['VLDLR', 'KCNV2', 'PUM3', 'RFX3', 'GLIS3']	['SLC1A1', 'SPATA6L', 'PLPP6', 'CDC37L1', 'AK3']	GLIS3
430	159	CCTCTCGCCAGCCATCTCAA	378	0.0161353	24	0.0448104	2.77716	chr13: 27616525	protein_coding: LNX2	2	['RPL21', 'RASL11A', 'GTF3A', 'MTIF3', 'LNX2']	['POLR1D', 'GSX1', 'PDX1', 'CDX2', 'URAD']	LNX2
432	160	TGTACGGCATGAAATTGGGG	627	0.0267642	36	0.0672156	2.5114	chr20: 46249741	protein_coding: CDH22	2	['MMP9', 'SLC12A5', 'NCOA5', 'CD40', 'CDH22']	['SLC35C2', 'ELMO2', 'ZNF334', 'OCSTAMP', 'SLC13A3']	CDH22
434	161	CTTATTTCTGAAATTTAAGA	171	0.00729932	14	0.0261394	3.58107	chr4: 79904023	protein_coding: ANTXR2	2	['BMP2K', 'PAQR3', 'NAA11', 'GK2', 'ANTXR2']	['PRDM8', 'FGF5', 'CFAP299', 'BMP3', 'PRKG2']	ANTXR2
438	163	AATAAATGTCTTGAGAACCA	221	0.00943363	26	0.0485446	5.14591	chr19: 7969061	protein_coding: ELAVL1	2	['TGFBR3L', 'SNAPC2', 'CTXN1', 'TIMM44', 'ELAVL1']	['CCL25', 'FBN3', 'CERS4', 'CD320', 'AC010323.1']	ELAVL1
444	165	CCGGCACCCATTCATCAAGG	674	0.0287704	41	0.0765511	2.66076	chr3: 147409323	protein_coding: ZIC1	2	['AC069528.2', 'PLSCR1', 'PLSCR5', 'ZIC4', 'ZIC1']	['AGTR1', 'CPB1', 'CPA3', 'GYG1', 'HLTF']	ZIC1
453	167	CTGATGTATTTTAAGCCCAG	442	0.0188673	33	0.0616143	3.26567	chr8: 98566732	protein_coding: STK3	2	['POP1', 'NIPAL2', 'AP003355.3', 'STK3', 'KCNS2']	['OSR2', 'VPS13B', 'COX6C', 'RGS22', 'FBXO43']	STK3
456	168	CCTTGGTCAGGTATTCCCAG	387	0.0165195	35	0.0653485	3.95583	chr1: 119894525	protein_coding: ADAM30	2	['ZNF697', 'PHGDH', 'HMGCS2', 'REG4', 'ADAM30']	['NOTCH2', 'SEC22B', 'NBPF26', 'PPIAL4A', 'AC241377.3']	ADAM30
458	169	CTGAGCAAACACCAGTCCAG	798	0.0340635	42	0.0784182	2.30212	chr7: 105456782	protein_coding: PUS7	2	['ORC5', 'LHFPL3', 'KMT2E', 'SRPK2', 'PUS7']	['RINT1', 'EFCAB10', 'ATXN7L1', 'CDHR3', 'AC004836.1']	PUS7
459	169	CTGAGCAAACACCAGTCCAG	798	0.0340635	42	0.0784182	2.30212	chr2: 9229295	protein_coding: ASAP2	2	['RNF144A', 'ID2', 'KIDINS220', 'MBOAT2', 'ASAP2']	['ITGB1BP1', 'CPSF3', 'IAH1', 'ADAM17', 'YWHAQ']	ASAP2
461	169	CTGAGCAAACACCAGTCCAG	798	0.0340635	42	0.0784182	2.30212	chr12: 123753105	protein_coding: ATP6V0A2	2	['GTF2H3', 'AC117503.3', 'AC117503.2', 'TCTN2', 'ATP6V0A2']	['AC117503.4', 'DNAH10', 'CCDC92', 'DNAH10OS', 'ZNF664']	ATP6V0A2
462	169	CTGAGCAAACACCAGTCCAG	798	0.0340635	42	0.0784182	2.30212	chr12: 123753185	protein_coding: ATP6V0A2	2	['GTF2H3', 'AC117503.3', 'AC117503.2', 'TCTN2', 'ATP6V0A2']	['AC117503.4', 'DNAH10', 'CCDC92', 'DNAH10OS', 'ZNF664']	ATP6V0A2
470	172	GCTGCGTACATACCTTTGAA	702	0.0299656	75	0.140032	4.6731	chr12: 103723587	protein_coding: STAB2	2	['IGF1', 'PAH', 'ASCL1', 'C12orf42', 'STAB2']	['NT5DC3', 'HSP90B1', 'C12orf73', 'TDG', 'GLT8D2']	STAB2
472	173	AAAGCACACAATCAACGGCA	385	0.0164341	22	0.0410762	2.49944	chr5: 146249342	protein_coding: RBM27, protein_coding: AC091959.3	2	['SH3RF2', 'PLAC8L1', 'LARS', 'AC091959.3', 'RBM27']	['POU4F3', 'TCERG1', 'GPR151', 'PPP2R2B', 'STK32A']	RBM27, AC091959.3
476	175	CCTTTCTCACTTCCTCGACA	70	0.00298803	8	0.0149368	4.99888	chr2: 54560781	protein_coding: SPTBN1	2	['PSME4', 'ACYP2', 'TSPYL6', 'C2orf73', 'SPTBN1']	['EML6', 'RTN4', 'CLHC1', 'RPS27A', 'MTIF2']	SPTBN1
480	176	CCGAGAACTCTCTCTAGCCG	816	0.0348319	40	0.074684	2.14413	chr17: 21697146	protein_coding: KCNJ18	2	['NATD1', 'MAP2K3', 'KCNJ12', 'C17orf51', 'KCNJ18']	['MTRNR2L1', 'WSB1', 'KSR1', 'AC015688.4', 'LGALS9']	KCNJ18
485	178	CCACAGTCATGCTCTCAGGA	718	0.0306486	49	0.0914879	2.98506	chr16: 89746201	protein_coding: FANCA	2	['CDK10', 'SPATA2L', 'VPS9D1', 'ZNF276', 'FANCA']	['SPIRE2', 'TCF25', 'MC1R', 'AC092143.1', 'TUBB3']	FANCA
486	178	CCACAGTCATGCTCTCAGGA	718	0.0306486	49	0.0914879	2.98506	chr10: 59266433	protein_coding: FAM13C	2	['UBE2D1', 'TFAM', 'BICC1', 'PHYHIPL', 'FAM13C']	['SLC16A9', 'MRLN', 'CCDC6', 'ANK3', 'CDK1']	FAM13C
495	181	GGAAAATAAAATCTACGGCA	450	0.0192087	25	0.0466775	2.43001	chr8: 61642027	protein_coding: ASPH	2	['CA8', 'RAB2A', 'CHD7', 'CLVS1', 'ASPH']	['NKAIN3', 'GGH', 'TTPA', 'YTHDF3', 'BHLHE22']	ASPH
505	186	CTGCTGACTTGCCTGAACAG	484	0.0206601	41	0.0765511	3.70527	chr3: 120167304	protein_coding: GPR156	2	['COX17', 'MAATS1', 'NR1I2', 'GSK3B', 'GPR156']	['LRRC58', 'FSTL1', 'NDUFB4', 'HGD', 'RABL3']	GPR156
507	187	AATAAATCTGTCACAACAGA	395	0.016861	36	0.0672156	3.98645	chr10: 116826244	protein_coding: HSPA12A	2	['PNLIP', 'PNLIPRP1', 'PNLIPRP2', 'C10orf82', 'HSPA12A']	['ENO4', 'SHTN1', 'VAX1', 'KCNK18', 'SLC18A2']	HSPA12A
516	191	CTATAAGAAAAGCATCAACA	599	0.025569	44	0.0821524	3.21297	chr18: 26136143	protein_coding: PSMA8	2	['HRH4', 'ZNF521', 'AC105114.1', 'SS18', 'PSMA8']	['TAF4B', 'KCTD1', 'AQP4', 'CHST9', 'CDH2']	PSMA8
518	192	CCTGATACAATATCTATAAA	237	0.0101166	16	0.0298736	2.95293	chr10: 11578467	protein_coding: USP6NL	2	['GATA3', 'AL583859.3', 'CELF2', 'AC026887.1', 'USP6NL']	['ECHDC3', 'PROSER2', 'UPF2', 'DHTKD1', 'SEC61A2']	USP6NL
520	193	CCTATGCAACTTTATACCAA	333	0.0142145	24	0.0448104	3.15245	chr21: 40337190	protein_coding: DSCAM	2	['SH3BGR', 'B3GALT5', 'IGSF5', 'PCP4', 'DSCAM']	['BACE2', 'FAM3B', 'MX2', 'MX1', 'TMPRSS2']	DSCAM
525	194	CTGGACCACATTGCAAGAGA	755	0.032228	41	0.0765511	2.3753	chr10: 18475554	protein_coding: CACNB2	2	['STAM', 'TMEM236', 'MRC1', 'SLC39A12', 'CACNB2']	['NSUN6', 'ARL5B', 'MALRD1', 'PLXDC2', 'NEBL']	CACNB2
527	195	ATTCATGATAACACTTTGGG	250	0.0106715	16	0.0298736	2.79937	chr10: 18475554	protein_coding: CACNB2	2	['STAM', 'TMEM236', 'MRC1', 'SLC39A12', 'CACNB2']	['NSUN6', 'ARL5B', 'MALRD1', 'PLXDC2', 'NEBL']	CACNB2
532	197	CTGCCTGCCCGGTCTCCCAA	587	0.0250567	35	0.0653485	2.60802	chr20: 37259615	protein_coding: GHRH	2	['SAMHD1', 'RBL1', 'MROH8', 'RPN2', 'GHRH']	['MANBAL', 'SRC', 'BLCAP', 'NNAT', 'CTNNBL1']	GHRH
535	198	CCATCAATATATATGTCACA	418	0.0178428	45	0.0840195	4.70888	chr18: 31916975	protein_coding: TRAPPC8	2	['DSG2', 'TTR', 'B4GALT6', 'SLC25A52', 'TRAPPC8']	['AC009831.4', 'RNF125', 'RNF138', 'GAREM1', 'MEP1B']	TRAPPC8
537	199	ATACTTCACGGCCCGACACA	315	0.0134461	28	0.0522788	3.88802	chr18: 31916975	protein_coding: TRAPPC8	2	['DSG2', 'TTR', 'B4GALT6', 'SLC25A52', 'TRAPPC8']	['AC009831.4', 'RNF125', 'RNF138', 'GAREM1', 'MEP1B']	TRAPPC8
543	202	CTGAGCAAACTCCAGTACAG	604	0.0257824	40	0.074684	2.8967	chr15: 80702701	protein_coding: ABHD17C	2	['ZFAND6', 'FAH', 'CTXND1', 'ARNT2', 'ABHD17C']	['CEMIP', 'MESD', 'TLNRD1', 'CFAP161', 'AC068870.3']	ABHD17C
544	202	CTGAGCAAACTCCAGTACAG	604	0.0257824	40	0.074684	2.8967	chr2: 9229295	protein_coding: ASAP2	2	['RNF144A', 'ID2', 'KIDINS220', 'MBOAT2', 'ASAP2']	['ITGB1BP1', 'CPSF3', 'IAH1', 'ADAM17', 'YWHAQ']	ASAP2
551	205	ACGGAACCTGTTCAGTGGAG	616	0.0262946	41	0.0765511	2.91128	chr14: 32784395	protein_coding: AKAP6	2	['DTD2', 'GPR33', 'NUBPL', 'ARHGAP5', 'AKAP6']	['AL049781.1', 'NPAS3', 'EGLN3', 'SPTSSA', 'EAPP']	AKAP6
553	206	GCTTACTGCACCAATCACCA	384	0.0163915	50	0.093355	5.69534	chr14: 32784395	protein_coding: AKAP6	2	['DTD2', 'GPR33', 'NUBPL', 'ARHGAP5', 'AKAP6']	['AL049781.1', 'NPAS3', 'EGLN3', 'SPTSSA', 'EAPP']	AKAP6
559	209	AATGCATCAGCGCAGCACAG	536	0.0228797	48	0.0896208	3.91704	chr16: 30021011	protein_coding: DOC2A	2	['TMEM219', 'TAOK2', 'HIRIP3', 'INO80E', 'DOC2A']	['C16orf92', 'FAM57B', 'AC093512.2', 'ALDOA', 'PPP4C']	DOC2A
565	211	GTTCCAAGCATGCTGCAAAG	294	0.0125497	29	0.0541459	4.31451	chr10: 50601726	protein_coding: SGMS1	2	['AGAP6', 'WASHC2A', 'ASAH2', 'SGMS1', 'AC069547.1']	['ASAH2B', 'A1CF', 'PRKG1', 'CSTF2T', 'DKK1']	SGMS1
567	212	TGTTCAGGACCAGAGCCCCA	471	0.0201052	23	0.0429433	2.13593	chr6: 166629269	protein_coding: RPS6KA2	2	['PRR18', 'SFT2D1', 'MPC1', 'AL022069.2', 'RPS6KA2']	['AL159163.1', 'RNASET2', 'FGFR1OP', 'CCR6', 'TCP10L2']	RPS6KA2
575	215	CCACCCAATTGCTATTCCAG	888	0.0379053	49	0.0914879	2.41359	chr7: 121120217	protein_coding: CPED1	2	['ANKRD7', 'KCND2', 'TSPAN12', 'ING3', 'CPED1']	['WNT16', 'FAM3C', 'PTPRZ1', 'AASS', 'FEZF1']	CPED1
577	216	CGGAGGCCTCCGACTAGAAG	488	0.0208308	30	0.056013	2.68895	chr10: 73358465	protein_coding: CFAP70	2	['ECD', 'FAM149B1', 'DNAJC9', 'MRPS16', 'CFAP70']	['ANXA7', 'MSS51', 'PPP3CB', 'USP54', 'MYOZ1']	CFAP70
581	217	CTGCCTGTTGCCAAGAGCAG	492	0.0210016	53	0.0989563	4.71185	chr3: 120004057	protein_coding: GSK3B	2	['POPDC2', 'COX17', 'MAATS1', 'NR1I2', 'GSK3B']	['GPR156', 'LRRC58', 'FSTL1', 'NDUFB4', 'HGD']	GSK3B
584	218	CCTGACGTCATTATTCACCA	472	0.0201478	53	0.0989563	4.91151	chr5: 71533831	protein_coding: BDP1	2	['SERF1A', 'SMN1', 'NAIP', 'GTF2H2', 'BDP1']	['MCCC2', 'CARTPT', 'MAP1B', 'MRPS27', 'PTCD2']	BDP1
586	218	CCTGACGTCATTATTCACCA	472	0.0201478	53	0.0989563	4.91151	chr19: 11111324	protein_coding: LDLR	2	['CARM1', 'YIPF2', 'TIMM29', 'SMARCA4', 'LDLR']	['SPC24', 'KANK2', 'DOCK6', 'AC011472.5', 'ANGPTL8']	LDLR
596	222	AGGAGCCTTCCTTTTTTAGA	360	0.015367	24	0.0448104	2.91602	chr14: 93040911	protein_coding: ITPK1	2	['RIN3', 'LGMN', 'GOLGA5', 'CHGA', 'ITPK1']	['MOAP1', 'TMEM251', 'AL110118.2', 'GON7', 'UBR7']	ITPK1
599	223	ACTGATAGATTAAAGTGCAG	311	0.0132754	15	0.0280065	2.10966	chrY: 7085021	protein_coding: TBL1Y	2	['TGIF2LY', 'PCDH11Y', 'TSPY2', 'AMELY', 'TBL1Y']	['TSPY4', 'TSPY8', 'TSPY3', 'TSPY1', 'TSPY10']	TBL1Y
601	224	CATCCTTGTATCCTGTGAGA	520	0.0221968	27	0.0504117	2.27113	chr2: 74866375	protein_coding: HK2	2	['LOXL3', 'DOK1', 'M1AP', 'SEMA4F', 'HK2']	['POLE4', 'TACR1', 'EVA1A', 'MRPL19', 'GCFC2']	HK2
605	226	CAGAATATAACCTCTCAAAG	591	0.0252275	33	0.0616143	2.44235	chr3: 89421208	protein_coding: EPHA3	2	['CGGBP1', 'ZNF654', 'C3orf38', 'CSNKA2IP', 'EPHA3']	['PROS1', 'ARL13B', 'STX19', 'DHFR2', 'NSUN3']	EPHA3

## Sheet: Target
	Tageted by Guides	positions	number of different positions
ASAP2	5	['chr2: 9229295 ']	1
AKAP6	3	['chr14: 32671632 ', 'chr14: 32784395 ']	2
AL365273.2	2	['chr10: 95880798 ']	1
ATP6V0A2	2	['chr12: 123753105 ', 'chr12: 123753185 ']	2
CACNB2	2	['chr10: 18475554 ']	1
DNAJC6	2	['chr1: 65370083 ']	1
ENTHD1	2	['chr22: 39774650 ']	1
NAV3	2	['chr12: 77705430 ']	1
PHACTR2	2	['chr6: 143729279 ']	1
PLEKHG1	2	['chr6: 150832199 ']	1
ROBO1	2	['chr3: 79563008 ', 'chr3: 79387914 ']	2
SCMH1	2	['chr1: 41119859 ']	1
SLC6A3	2	['chr5: 1395570 ']	1
STAB2	2	['chr12: 103715021 ', 'chr12: 103723587 ']	2
TRAPPC8	2	['chr18: 31916975 ']	1
ABHD17C	1	['chr15: 80702701 ']	1
ABL1	1	['chr9: 130743009 ']	1
AC022414.1	1	['chr5: 77412152 ']	1
ACTL8	1	['chr1: 17779163 ']	1
ADAM30	1	['chr1: 119894525 ']	1
ADCY9	1	['chr16: 4045089 ']	1
ADK	1	['chr10: 74198552 ']	1
AHSG	1	['chr3: 186616558 ']	1
ALDH1A2	1	['chr15: 58232096 ']	1
ANKIB1	1	['chr7: 92394036 ']	1
ANTXR2	1	['chr4: 79904023 ']	1
APOL5	1	['chr22: 35729051 ']	1
ARHGAP26	1	['chr5: 143071985 ']	1
ARL15	1	['chr5: 54206069 ']	1
ASPH	1	['chr8: 61642027 ']	1
AUTS2	1	['chr7: 69741914 ']	1
AVPR2	1	['chrX: 153905834 ']	1
BDP1	1	['chr5: 71533831 ']	1
C14orf93	1	['chr14: 23008690 ']	1
CABIN1	1	['chr22: 24063890 ']	1
CACNA1C	1	['chr12: 2349885 ']	1
CDH22	1	['chr20: 46249741 ']	1
CFAP70	1	['chr10: 73358465 ']	1
CHST3	1	['chr10: 71998135 ']	1
CLNS1A	1	['chr11: 77628208 ']	1
CPED1	1	['chr7: 121120217 ']	1
CYSLTR2	1	['chr13: 48707205 ']	1
DCAF8L2	1	['chrX: 27734164 ']	1
DCLRE1A	1	['chr10: 113850560 ']	1
DLGAP1	1	['chr18: 3633048 ']	1
DNAH11	1	['chr7: 21627290 ']	1
DNMBP	1	['chr10: 99940792 ']	1
DOC2A	1	['chr16: 30021011 ']	1
DOCK1	1	['chr10: 127289202 ']	1
DOCK4	1	['chr7: 112204523 ']	1
DSCAM	1	['chr21: 40337190 ']	1
DST	1	['chr6: 56941734 ']	1
EDIL3	1	['chr5: 84213945 ']	1
EHBP1	1	['chr2: 62982408 ']	1
ELAVL1	1	['chr19: 7969061 ']	1
EPHA3	1	['chr3: 89421208 ']	1
EPHB1	1	['chr3: 134824475 ']	1
ESRRG	1	['chr1: 216504883 ']	1
FAM13C	1	['chr10: 59266433 ']	1
FANCA	1	['chr16: 89746201 ']	1
FANCE	1	['chr6: 35461311 ']	1
FBN1	1	['chr15: 48469213 ']	1
FHIT	1	['chr3: 59775502 ']	1
FOLR1	1	['chr11: 72191212 ']	1
FOXN3	1	['chr14: 89133376 ']	1
GALNTL6	1	['chr4: 172657013 ']	1
GBP3	1	['chr1: 89013139 ']	1
GHRH	1	['chr20: 37259615 ']	1
GLIS3	1	['chr9: 4093437 ']	1
GOLGA3	1	['chr12: 132797033 ']	1
GPR156	1	['chr3: 120167304 ']	1
GRM1	1	['chr6: 146292343 ']	1
GSK3B	1	['chr3: 120004057 ']	1
H2AFY	1	['chr5: 135386659 ']	1
HK2	1	['chr2: 74866375 ']	1
HOMER1	1	['chr5: 79496284 ']	1
HSPA12A	1	['chr10: 116826244 ']	1
IL3RA	1	['chrX: 1352468 ']	1
INA	1	['chr10: 103282011 ']	1
INCENP	1	['chr11: 62146286 ']	1
INSR	1	['chr19: 7233366 ']	1
INTU	1	['chr4: 127637323 ']	1
IRF5	1	['chr7: 128939209 ']	1
ITGB1	1	['chr10: 32981788 ']	1
ITPK1	1	['chr14: 93040911 ']	1
KCNJ18	1	['chr17: 21697146 ']	1
KLHL32	1	['chr6: 96949151 ']	1
LAMA3	1	['chr18: 23764239 ']	1
LDLR	1	['chr19: 11111324 ']	1
LIPA	1	['chr10: 89411671 ']	1
LNX2	1	['chr13: 27616525 ']	1
LRCH1	1	['chr13: 46672902 ']	1
MAP2K6	1	['chr17: 69512972 ']	1
MAPKAPK3	1	['chr3: 50633650 ']	1
ME3	1	['chr11: 86617582 ']	1
MECOM	1	['chr3: 169093610 ']	1
MGAT4C	1	['chr12: 86603005 ']	1
MPPED1	1	['chr22: 43446344 ']	1
MRPS9	1	['chr2: 105096468 ']	1
MRVI1	1	['chr11: 10686968 ']	1
MTBP	1	['chr8: 120445481 ']	1
NAALAD2	1	['chr11: 90142746 ']	1
NINL	1	['chr20: 25571913 ']	1
NPLOC4	1	['chr17: 81635498 ']	1
NTM	1	['chr11: 131562516 ']	1
OSTN	1	['chr3: 191222147 ']	1
PARPBP	1	['chr12: 102127845 ']	1
PCBD2	1	['chr5: 134925738 ']	1
PDE4DIP	1	['chr1: 149001035 ']	1
PDE8A	1	['chr15: 85095745 ']	1
PLCH1	1	['chr3: 155602312 ']	1
PLGRKT	1	['chr9: 5403147 ']	1
POLE2	1	['chr14: 49663308 ']	1
PPM1H	1	['chr12: 62909025 ']	1
PPP2R3A	1	['chr3: 136056779 ']	1
PRDM16	1	['chr1: 3136108 ']	1
PRKCE	1	['chr2: 45968602 ']	1
PRKN	1	['chr6: 161567301 ']	1
PSMA8	1	['chr18: 26136143 ']	1
PTK2B	1	['chr8: 27451190 ']	1
PUS7	1	['chr7: 105456782 ']	1
RAET1G	1	['chr6: 149921016 ']	1
RBFOX3	1	['chr17: 79163474 ']	1
RBM27	1	['chr5: 146249342 ']	1
RGS9	1	['chr17: 65181562 ']	1
RIN3	1	['chr14: 92589522 ']	1
RMDN1	1	['chr8: 86495497 ']	1
RPS6KA2	1	['chr6: 166629269 ']	1
SEC24B	1	['chr4: 109454977 ']	1
SEMA6D	1	['chr15: 47673152 ']	1
SGMS1	1	['chr10: 50601726 ']	1
SLC16A7	1	['chr12: 59630177 ']	1
SLC37A3	1	['chr7: 140331848 ']	1
SLC46A1	1	['chr17: 28404283 ']	1
SLC9A8	1	['chr20: 49831124 ']	1
SMARCA4	1	['chr19: 11055490 ']	1
SNTG1	1	['chr8: 50041188 ']	1
SPTBN1	1	['chr2: 54560781 ']	1
STK3	1	['chr8: 98566732 ']	1
STX8	1	['chr17: 9365346 ']	1
TAB2	1	['chr6: 149230724 ']	1
TBC1D31	1	['chr8: 123088319 ']	1
TBL1Y	1	['chrY: 7085021 ']	1
TGFA	1	['chr2: 70536066 ']	1
TM9SF4	1	['chr20: 32138892 ']	1
TMEM74	1	['chr8: 108754961 ']	1
TRERF1	1	['chr6: 42289745 ']	1
TRPV5	1	['chr7: 142929674 ']	1
USP49	1	['chr6: 41821463 ']	1
USP6NL	1	['chr10: 11578467 ']	1
UST	1	['chr6: 149043364 ']	1
VWA8	1	['chr13: 41655927 ']	1
WWC1	1	['chr5: 168344728 ']	1
ZFP64	1	['chr20: 52070919 ']	1
ZIC1	1	['chr3: 147409323 ']	1
ZNF107	1	['chr7: 64683066 ']	1
ZNF365	1	['chr10: 62451286 ']	1
ZNF385C	1	['chr17: 42093181 ']	1
ZNF618	1	['chr9: 113936156 ']	1
