# Supplementary material for: Circular synthesized CRISPR/Cas gRNAs for functional interrogations in the coding and noncoding genome
Source: eLife journal article supplement (doi:10.7554/elife.42549), 2019-03-06
Supplement: supp [file elife-42549-supp-v1.zip › elife_poa_e42549_Supplementary_File_13.xlsx]

## Sheet: Hits
	Unnamed: 0	Guide	Read counts CTRL	CTRL (%)	Read counts Doxo	Doxo (%)	Doxo(%)/CTRL(%)	position	annotation	mismatch	upstream_genes	downstream_genes	all_genes
0	93	ACTTTTCCTTACCAGTAAAG	275	0.0117387	22	0.0410762	3.49922	chr8: 93022800		0	['OTUD6B', 'LRRC69', 'SLC26A7', 'RUNX1T1', 'TRIQK']	['FAM92A', 'RBM12B', 'RBM12B-AS1', 'TMEM67', 'PDP1']	['OTUD6B', 'LRRC69', 'SLC26A7', 'RUNX1T1', 'TRIQK', 'FAM92A', 'RBM12B', 'RBM12B-AS1', 'TMEM67', 'PDP1']
1	23	TGAAAAGAACATCTACAGAG	411	0.017544	24	0.0448104	2.55417	chr10: 26873904		1	['GAD2', 'APBB1IP', 'AL390961.3', 'PDSS1', 'ABI1']	['ANKRD26', 'YME1L1', 'MASTL', 'ACBD5', 'PTCHD3']	['GAD2', 'APBB1IP', 'AL390961.3', 'PDSS1', 'ABI1', 'ANKRD26', 'YME1L1', 'MASTL', 'ACBD5', 'PTCHD3']
2	26	CAATTTATTTACCTGTCCAG	534	0.0227944	26	0.0485446	2.12967	chr7: 134974490		1	['AKR1B1', 'AKR1B10', 'AKR1B15', 'BPGM', 'CALD1']	['AGBL3', 'CYREN', 'TMEM140', 'WDR91', 'STRA8']	['AKR1B1', 'AKR1B10', 'AKR1B15', 'BPGM', 'CALD1', 'AGBL3', 'CYREN', 'TMEM140', 'WDR91', 'STRA8']
3	83	CTATCTCCCTCTTCATCACA	247	0.0105435	32	0.0597472	5.66675	chr11: 34717155		1	['NAT10', 'ABTB2', 'CAT', 'ELF5', 'EHF']	['APIP', 'PDHX', 'CD44', 'SLC1A2', 'PAMR1']	['NAT10', 'ABTB2', 'CAT', 'ELF5', 'EHF', 'APIP', 'PDHX', 'CD44', 'SLC1A2', 'PAMR1']
4	136	TGGTTTGGAGGCAAGTGACA	342	0.0145986	20	0.037342	2.55791	chr1: 29331667	lincRNA: LINC01756	1	['EPB41', 'TMEM200B', 'SRSF4', 'MECR', 'PTPRU']	['MATN1', 'LAPTM5', 'SDC3', 'PUM1', 'NKAIN1']	['EPB41', 'TMEM200B', 'SRSF4', 'MECR', 'PTPRU', 'MATN1', 'LAPTM5', 'SDC3', 'PUM1', 'NKAIN1']
5	189	CAAGGTATTGAAGCTAAAAG	584	0.0249287	77	0.143767	5.76712	chr17: 65181562	Transcription factor binding site: TF binding site	1	['CEP95', 'SMURF2', 'LRRC37A3', 'GNA13', 'RGS9']	['AXIN2', 'AC004805.1', 'CEP112', 'APOH', 'PRKCA']	['CEP95', 'SMURF2', 'LRRC37A3', 'GNA13', 'RGS9', 'AXIN2', 'AC004805.1', 'CEP112', 'APOH', 'PRKCA']
6	195	ATTCATGATAACACTTTGGG	250	0.0106715	16	0.0298736	2.79937	chr2: 211103345		1	['AC006994.2', 'ACADL', 'MYL1', 'LANCL1', 'CPS1']	['ERBB4', 'IKZF2', 'SPAG16', 'VWC2L', 'BARD1']	['AC006994.2', 'ACADL', 'MYL1', 'LANCL1', 'CPS1', 'ERBB4', 'IKZF2', 'SPAG16', 'VWC2L', 'BARD1']
7	206	GCTTACTGCACCAATCACCA	384	0.0163915	50	0.093355	5.69534	chr15: 93351922	lincRNA: AC091078.1	1	['FAM174B', 'AC013394.1', 'CHD2', 'RGMA', 'AC112693.3']	['MCTP2', 'AC104260.2', 'AC012409.5', 'AC016251.1', 'AC016251.2']	['FAM174B', 'AC013394.1', 'CHD2', 'RGMA', 'AC112693.3', 'MCTP2', 'AC104260.2', 'AC012409.5', 'AC016251.1', 'AC016251.2']
8	217	CTGCCTGTTGCCAAGAGCAG	492	0.0210016	53	0.0989563	4.71185	chr3: 134378450	CTCF binding site: CTCF Binding Site, Transcription factor binding site: TF binding site	1	['RAB6B', 'C3orf36', 'SLCO2A1', 'RYK', 'AMOTL2']	['ANAPC13', 'CEP63', 'EPHB1', 'KY', 'PPP2R3A']	['RAB6B', 'C3orf36', 'SLCO2A1', 'RYK', 'AMOTL2', 'ANAPC13', 'CEP63', 'EPHB1', 'KY', 'PPP2R3A']
9	1	TTGGTAATACCCCTTTGGGG	163	0.00695783	30	0.056013	8.05035	chr15: 94044085	lincRNA: LINC01579, lincRNA: LINC01581	2	['FAM174B', 'AC013394.1', 'CHD2', 'RGMA', 'AC112693.3']	['MCTP2', 'AC104260.2', 'AC012409.5', 'AC016251.1', 'AC016251.2']	['FAM174B', 'AC013394.1', 'CHD2', 'RGMA', 'AC112693.3', 'MCTP2', 'AC104260.2', 'AC012409.5', 'AC016251.1', 'AC016251.2']
10	2	CTGCCTGTTGCCAAAAGCAG	716	0.0305632	57	0.106425	3.48211	chr1: 105967667	lincRNA: AL355306.2, lincRNA: LINC01677	2	['AMY2B', 'AMY2A', 'AMY1A', 'AMY1B', 'AMY1C']	['PRMT6', 'NTNG1', 'VAV3', 'SLC25A24', 'AL359258.3']	['AMY2B', 'AMY2A', 'AMY1A', 'AMY1B', 'AMY1C', 'PRMT6', 'NTNG1', 'VAV3', 'SLC25A24', 'AL359258.3']
11	2	CTGCCTGTTGCCAAAAGCAG	716	0.0305632	57	0.106425	3.48211	chr2: 225376800		2	['SERPINE2', 'FAM124B', 'CUL3', 'CCDC195', 'DOCK10']	['NYAP2', 'AC016717.3', 'IRS1', 'RHBDD1', 'COL4A4']	['SERPINE2', 'FAM124B', 'CUL3', 'CCDC195', 'DOCK10', 'NYAP2', 'AC016717.3', 'IRS1', 'RHBDD1', 'COL4A4']
12	2	CTGCCTGTTGCCAAAAGCAG	716	0.0305632	57	0.106425	3.48211	chr5: 80110814		2	['HOMER1', 'TENT2', 'CMYA5', 'MTX3', 'THBS4']	['SERINC5', 'SPZ1', 'ZFYVE16', 'FAM151B', 'ANKRD34B']	['HOMER1', 'TENT2', 'CMYA5', 'MTX3', 'THBS4', 'SERINC5', 'SPZ1', 'ZFYVE16', 'FAM151B', 'ANKRD34B']
13	2	CTGCCTGTTGCCAAAAGCAG	716	0.0305632	57	0.106425	3.48211	chr3: 134378450	CTCF binding site: CTCF Binding Site, Transcription factor binding site: TF binding site	2	['RAB6B', 'C3orf36', 'SLCO2A1', 'RYK', 'AMOTL2']	['ANAPC13', 'CEP63', 'EPHB1', 'KY', 'PPP2R3A']	['RAB6B', 'C3orf36', 'SLCO2A1', 'RYK', 'AMOTL2', 'ANAPC13', 'CEP63', 'EPHB1', 'KY', 'PPP2R3A']
14	2	CTGCCTGTTGCCAAAAGCAG	716	0.0305632	57	0.106425	3.48211	chr10: 118618077		2	['PDZD8', 'EMX2', 'RAB11FIP2', 'FAM204A', 'PRLHR']	['CACUL1', 'NANOS1', 'EIF3A', 'FAM45A', 'SFXN4']	['PDZD8', 'EMX2', 'RAB11FIP2', 'FAM204A', 'PRLHR', 'CACUL1', 'NANOS1', 'EIF3A', 'FAM45A', 'SFXN4']
15	3	GTACTACCTGATGTGCAGGA	270	0.0115252	25	0.0466775	4.05002	chr8: 133596004		2	['TG', 'SLA', 'WISP1', 'NDRG1', 'ST3GAL1']	['ZFAT', 'AC087045.3', 'AC083843.4', 'KHDRBS3', 'FAM135B']	['TG', 'SLA', 'WISP1', 'NDRG1', 'ST3GAL1', 'ZFAT', 'AC087045.3', 'AC083843.4', 'KHDRBS3', 'FAM135B']
16	4	AGTGAAAACCTACCACCCCA	624	0.0266361	95	0.177374	6.65917	chr8: 123661773	Open chromatin region: Open chromatin	2	['ZHX1', 'ATAD2', 'WDYHV1', 'FBXO32', 'KLHL38']	['ANXA13', 'FAM91A1', 'FER1L6', 'TMEM65', 'TRMT12']	['ZHX1', 'ATAD2', 'WDYHV1', 'FBXO32', 'KLHL38', 'ANXA13', 'FAM91A1', 'FER1L6', 'TMEM65', 'TRMT12']
17	5	TATATTGATACCATATAGAG	284	0.0121229	14	0.0261394	2.15621	chrX: 56546543		2	['MAGEH1', 'USP51', 'FOXR2', 'RRAGB', 'KLF8']	['UBQLN2', 'NBDY', 'SPIN3', 'SPIN2B', 'SPIN2A']	['MAGEH1', 'USP51', 'FOXR2', 'RRAGB', 'KLF8', 'UBQLN2', 'NBDY', 'SPIN3', 'SPIN2B', 'SPIN2A']
18	6	CAGGCACCAAAAACAAAACA	628	0.0268069	64	0.119494	4.4576	chr6: 150103083		2	['RAET1G', 'ULBP2', 'ULBP1', 'RAET1L', 'ULBP3']	['PPP1R14C', 'IYD', 'PLEKHG1', 'MTHFD1L', 'AKAP12']	['RAET1G', 'ULBP2', 'ULBP1', 'RAET1L', 'ULBP3', 'PPP1R14C', 'IYD', 'PLEKHG1', 'MTHFD1L', 'AKAP12']
19	6	CAGGCACCAAAAACAAAACA	628	0.0268069	64	0.119494	4.4576	chr10: 62451286	Predicted promoter flanking region: Promoter Flanking Region	2	['TMEM26', 'CABCOCO1', 'ARID5B', 'RTKN2', 'ZNF365']	['ADO', 'EGR2', 'NRBF2', 'JMJD1C', 'REEP3']	['TMEM26', 'CABCOCO1', 'ARID5B', 'RTKN2', 'ZNF365', 'ADO', 'EGR2', 'NRBF2', 'JMJD1C', 'REEP3']
20	6	CAGGCACCAAAAACAAAACA	628	0.0268069	64	0.119494	4.4576	chr2: 173827443		2	['ITGA6', 'PDK1', 'RAPGEF4', 'MAP3K20', 'CDCA7']	['SP3', 'OLA1', 'AC018470.1', 'SP9', 'CIR1']	['ITGA6', 'PDK1', 'RAPGEF4', 'MAP3K20', 'CDCA7', 'SP3', 'OLA1', 'AC018470.1', 'SP9', 'CIR1']
21	7	GAGGCTACTGATCTACAAAA	508	0.0216845	29	0.0541459	2.49698	chr15: 46196807		2	['C15orf48', 'SLC30A4', 'BLOC1S6', 'AC090527.2', 'SQOR']	['AC066615.1', 'SEMA6D', 'SLC24A5', 'MYEF2', 'CTXN2']	['C15orf48', 'SLC30A4', 'BLOC1S6', 'AC090527.2', 'SQOR', 'AC066615.1', 'SEMA6D', 'SLC24A5', 'MYEF2', 'CTXN2']
22	11	GCGCTGTCACTGGTGTGGGA	705	0.0300937	48	0.0896208	2.97806	chr8: 20435223	CTCF binding site: CTCF Binding Site	2	['INTS10', 'LPL', 'SLC18A1', 'ATP6V1B2', 'LZTS1']	['AC021613.1', 'GFRA2', 'DOK2', 'XPO7', 'NPM2']	['INTS10', 'LPL', 'SLC18A1', 'ATP6V1B2', 'LZTS1', 'AC021613.1', 'GFRA2', 'DOK2', 'XPO7', 'NPM2']
23	12	TGAAAAGACCATATACAGAG	500	0.021343	34	0.0634814	2.97434	chr14: 21813515		2	['TRAV5', 'TRAV6', 'TRAV7', 'TRAV8-1', 'TRAV9-1']	['TRAV10', 'TRAV12-1', 'TRAV8-2', 'TRAV8-3', 'TRAV13-1']	['TRAV5', 'TRAV6', 'TRAV7', 'TRAV8-1', 'TRAV9-1', 'TRAV10', 'TRAV12-1', 'TRAV8-2', 'TRAV8-3', 'TRAV13-1']
24	12	TGAAAAGACCATATACAGAG	500	0.021343	34	0.0634814	2.97434	chrX: 42915060		2	['CASK', 'GPR34', 'GPR82', 'AL023875.1', 'PPP1R2C']	['MAOA', 'MAOB', 'NDP', 'EFHC2', 'FUNDC1']	['CASK', 'GPR34', 'GPR82', 'AL023875.1', 'PPP1R2C', 'MAOA', 'MAOB', 'NDP', 'EFHC2', 'FUNDC1']
25	12	TGAAAAGACCATATACAGAG	500	0.021343	34	0.0634814	2.97434	chr11: 60570893		2	['MS4A14', 'MS4A5', 'MS4A1', 'MS4A12', 'MS4A13']	['MS4A8', 'MS4A18', 'MS4A15', 'MS4A10', 'CCDC86']	['MS4A14', 'MS4A5', 'MS4A1', 'MS4A12', 'MS4A13', 'MS4A8', 'MS4A18', 'MS4A15', 'MS4A10', 'CCDC86']
26	12	TGAAAAGACCATATACAGAG	500	0.021343	34	0.0634814	2.97434	chr7: 145048388		2	['CTAGE8', 'OR2A1', 'ARHGEF5', 'NOBOX', 'TPK1']	['AC073308.1', 'CNTNAP2', 'C7orf33', 'CUL1', 'EZH2']	['CTAGE8', 'OR2A1', 'ARHGEF5', 'NOBOX', 'TPK1', 'AC073308.1', 'CNTNAP2', 'C7orf33', 'CUL1', 'EZH2']
27	13	CTGACCATTCCGTTATCACA	416	0.0177574	25	0.0466775	2.62862	chr10: 3197670	Predicted promoter flanking region: Promoter Flanking Region	2	['IDI1', 'WDR37', 'ADARB2', 'PFKP', 'PITRM1']	['KLF6', 'AKR1E2', 'AKR1C1', 'AKR1C2', 'AKR1C3']	['IDI1', 'WDR37', 'ADARB2', 'PFKP', 'PITRM1', 'KLF6', 'AKR1E2', 'AKR1C1', 'AKR1C2', 'AKR1C3']
28	15	ACACAATTCCGGCCATTGCA	524	0.0223675	75	0.140032	6.26053	chr3: 20849148	processed_transcript: SGO1-AS1	2	['EFHB', 'RAB5A', 'PP2D1', 'KAT2B', 'SGO1']	['ZNF385D', 'UBE2E2', 'UBE2E1', 'NKIRAS1', 'RPL15']	['EFHB', 'RAB5A', 'PP2D1', 'KAT2B', 'SGO1', 'ZNF385D', 'UBE2E2', 'UBE2E1', 'NKIRAS1', 'RPL15']
29	15	ACACAATTCCGGCCATTGCA	524	0.0223675	75	0.140032	6.26053	chr4: 175563886		2	['FBXO8', 'CEP44', 'HPGD', 'GLRA3', 'ADAM29']	['GPM6A', 'WDR17', 'SPATA4', 'ASB5', 'SPCS3']	['FBXO8', 'CEP44', 'HPGD', 'GLRA3', 'ADAM29', 'GPM6A', 'WDR17', 'SPATA4', 'ASB5', 'SPCS3']
30	18	CGGTGGTCTTTGGAACCCAG	521	0.0222395	36	0.0672156	3.02236	chr14: 92589522	CTCF binding site: CTCF Binding Site	2	['ATXN3', 'NDUFB1', 'CPSF2', 'SLC24A4', 'RIN3']	['LGMN', 'GOLGA5', 'CHGA', 'ITPK1', 'MOAP1']	['ATXN3', 'NDUFB1', 'CPSF2', 'SLC24A4', 'RIN3', 'LGMN', 'GOLGA5', 'CHGA', 'ITPK1', 'MOAP1']
31	20	TATTCAATTATACTTCCGCA	98	0.00418324	28	0.0522788	12.4972	chr4: 31886149		2	['RBPJ', 'CCKAR', 'TBC1D19', 'STIM2', 'PCDH7']	['ARAP2', 'DTHD1', 'NWD2', 'C4orf19', 'RELL1']	['RBPJ', 'CCKAR', 'TBC1D19', 'STIM2', 'PCDH7', 'ARAP2', 'DTHD1', 'NWD2', 'C4orf19', 'RELL1']
32	23	TGAAAAGAACATCTACAGAG	411	0.017544	24	0.0448104	2.55417	chr11: 60570893		2	['MS4A14', 'MS4A5', 'MS4A1', 'MS4A12', 'MS4A13']	['MS4A8', 'MS4A18', 'MS4A15', 'MS4A10', 'CCDC86']	['MS4A14', 'MS4A5', 'MS4A1', 'MS4A12', 'MS4A13', 'MS4A8', 'MS4A18', 'MS4A15', 'MS4A10', 'CCDC86']
33	25	TGATTTACTTACTTTTGGGG	185	0.00789693	17	0.0317407	4.01937	chr11: 36880110		2	['TRAF6', 'AC061999.1', 'RAG1', 'RAG2', 'C11orf74']	['AC103798.2', 'AC080100.1', 'LRRC4C', 'API5', 'TTC17']	['TRAF6', 'AC061999.1', 'RAG1', 'RAG2', 'C11orf74', 'AC103798.2', 'AC080100.1', 'LRRC4C', 'API5', 'TTC17']
34	25	TGATTTACTTACTTTTGGGG	185	0.00789693	17	0.0317407	4.01937	chr10: 71998135	Predicted promoter flanking region: Promoter Flanking Region	2	['CDH23', 'C10orf105', 'VSIR', 'PSAP', 'CHST3']	['SPOCK2', 'ASCC1', 'ANAPC16', 'DDIT4', 'DNAJB12']	['CDH23', 'C10orf105', 'VSIR', 'PSAP', 'CHST3', 'SPOCK2', 'ASCC1', 'ANAPC16', 'DDIT4', 'DNAJB12']
35	26	CAATTTATTTACCTGTCCAG	534	0.0227944	26	0.0485446	2.12967	chr10: 71998135	Predicted promoter flanking region: Promoter Flanking Region	2	['CDH23', 'C10orf105', 'VSIR', 'PSAP', 'CHST3']	['SPOCK2', 'ASCC1', 'ANAPC16', 'DDIT4', 'DNAJB12']	['CDH23', 'C10orf105', 'VSIR', 'PSAP', 'CHST3', 'SPOCK2', 'ASCC1', 'ANAPC16', 'DDIT4', 'DNAJB12']
36	27	CCTTGGTTAGGTATTCCCAG	326	0.0139157	46	0.0858866	6.17193	chr5: 151595853		2	['GM2A', 'SLC36A3', 'SLC36A2', 'SLC36A1', 'FAT2']	['SPARC', 'ATOX1', 'G3BP1', 'GLRA1', 'NMUR2']	['GM2A', 'SLC36A3', 'SLC36A2', 'SLC36A1', 'FAT2', 'SPARC', 'ATOX1', 'G3BP1', 'GLRA1', 'NMUR2']
37	29	CTGCGGTCTCCCCAACAGGA	775	0.0330817	39	0.0728169	2.20112	chr1: 207841996	lincRNA: MIR29B2CHG	2	['CD55', 'CR2', 'CR1', 'CR1L', 'CD46']	['CD34', 'PLXNA2', 'CAMK1G', 'LAMB3', 'G0S2']	['CD55', 'CR2', 'CR1', 'CR1L', 'CD46', 'CD34', 'PLXNA2', 'CAMK1G', 'LAMB3', 'G0S2']
38	30	CGATAATAACCTCCACAGAG	457	0.0195075	27	0.0504117	2.58421	chr10: 94670929		2	['SLC35G1', 'PLCE1', 'NOC3L', 'TBC1D12', 'HELLS']	['CYP2C18', 'AL583836.1', 'CYP2C19', 'CYP2C9', 'CYP2C8']	['SLC35G1', 'PLCE1', 'NOC3L', 'TBC1D12', 'HELLS', 'CYP2C18', 'AL583836.1', 'CYP2C19', 'CYP2C9', 'CYP2C8']
39	31	CAGTGATAAGCACCATTGCG	670	0.0285997	58	0.108292	3.78647	chr4: 127602114		2	['NUDT6', 'SPATA5', 'SPRY1', 'ANKRD50', 'FAT4']	['INTU', 'SLC25A31', 'HSPA4L', 'PLK4', 'MFSD8']	['NUDT6', 'SPATA5', 'SPRY1', 'ANKRD50', 'FAT4', 'INTU', 'SLC25A31', 'HSPA4L', 'PLK4', 'MFSD8']
40	32	TCACCAAATCTAGATAAAAG	576	0.0245872	36	0.0672156	2.73376	chr15: 39284781	lincRNA: AC013652.1	2	['TMCO5A', 'SPRED1', 'FAM98B', 'RASGRP1', 'C15orf53']	['THBS1', 'FSIP1', 'GPR176', 'EIF2AK4', 'SRP14']	['TMCO5A', 'SPRED1', 'FAM98B', 'RASGRP1', 'C15orf53', 'THBS1', 'FSIP1', 'GPR176', 'EIF2AK4', 'SRP14']
41	34	CTATCTTGCTCCACTTCCAA	288	0.0122936	14	0.0261394	2.12626	chr6: 93684039		2	['CASP8AP2', 'GJA10', 'BACH2', 'MAP3K7', 'EPHA7']	['AL356094.1', 'AL078595.3', 'MANEA', 'FUT9', 'UFL1']	['CASP8AP2', 'GJA10', 'BACH2', 'MAP3K7', 'EPHA7', 'AL356094.1', 'AL078595.3', 'MANEA', 'FUT9', 'UFL1']
42	35	GCTCGGGGAATACCGTAGCG	974	0.0415763	66	0.123229	2.96392	chr19: 4833280		2	['TNFAIP8L1', 'MYDGF', 'DPP9', 'FEM1A', 'TICAM1']	['PLIN3', 'ARRDC5', 'UHRF1', 'KDM4B', 'PTPRS']	['TNFAIP8L1', 'MYDGF', 'DPP9', 'FEM1A', 'TICAM1', 'PLIN3', 'ARRDC5', 'UHRF1', 'KDM4B', 'PTPRS']
43	36	CTTTTCCAATAGCAGAAGAA	210	0.00896408	40	0.074684	8.33147	chr19: 4833280		2	['TNFAIP8L1', 'MYDGF', 'DPP9', 'FEM1A', 'TICAM1']	['PLIN3', 'ARRDC5', 'UHRF1', 'KDM4B', 'PTPRS']	['TNFAIP8L1', 'MYDGF', 'DPP9', 'FEM1A', 'TICAM1', 'PLIN3', 'ARRDC5', 'UHRF1', 'KDM4B', 'PTPRS']
44	38	CTATCTTGCTTCCCTTCCAA	247	0.0105435	16	0.0298736	2.83338	chr1: 40036652		2	['BMP8B', 'OXCT2', 'TRIT1', 'MYCL', 'MFSD2A']	['CAP1', 'PPT1', 'RLF', 'TMCO2', 'ZMPSTE24']	['BMP8B', 'OXCT2', 'TRIT1', 'MYCL', 'MFSD2A', 'CAP1', 'PPT1', 'RLF', 'TMCO2', 'ZMPSTE24']
45	39	TGGGGCCCTCTATTGCTGAG	486	0.0207454	48	0.0896208	4.32002	chr5: 134925738	: motif_Egr1	2	['DDX46', 'C5orf24', 'TXNDC15', 'PCBD2', 'AC006077.2']	['CATSPER3', 'PITX1', 'H2AFY', 'DCANP1', 'TIFAB']	['DDX46', 'C5orf24', 'TXNDC15', 'PCBD2', 'AC006077.2', 'CATSPER3', 'PITX1', 'H2AFY', 'DCANP1', 'TIFAB']
46	39	TGGGGCCCTCTATTGCTGAG	486	0.0207454	48	0.0896208	4.32002	chr7: 68736601	Open chromatin region: Open chromatin	2	['AC027644.4', 'RABGEF1', 'TMEM248', 'SBDS', 'TYW1']	['AUTS2', 'GALNT17', 'CALN1', 'TYW1B', 'POM121']	['AC027644.4', 'RABGEF1', 'TMEM248', 'SBDS', 'TYW1', 'AUTS2', 'GALNT17', 'CALN1', 'TYW1B', 'POM121']
47	40	AGTATATTCTCGTCTAAGGA	215	0.00917751	19	0.0354749	3.86542	chr13: 106372978	Predicted promoter flanking region: Promoter Flanking Region	2	['BIVM', 'BIVM-ERCC5', 'ERCC5', 'SLC10A2', 'DAOA']	['EFNB2', 'ARGLU1', 'AL162574.3', 'FAM155A', 'LIG4']	['BIVM', 'BIVM-ERCC5', 'ERCC5', 'SLC10A2', 'DAOA', 'EFNB2', 'ARGLU1', 'AL162574.3', 'FAM155A', 'LIG4']
48	41	TATTCAAATATGCTTCCGCA	276	0.0117814	25	0.0466775	3.96198	chr4: 151347946	lincRNA: AC104819.3	2	['LRBA', 'MAB21L2', 'RPS3A', 'SH3D19', 'PRSS48']	['FAM160A1', 'AC092611.3', 'GATB', 'FBXW7', 'MIR4453HG']	['LRBA', 'MAB21L2', 'RPS3A', 'SH3D19', 'PRSS48', 'FAM160A1', 'AC092611.3', 'GATB', 'FBXW7', 'MIR4453HG']
49	42	AGGTTCCCATTTAATAAGAA	305	0.0130193	14	0.0261394	2.00775	chr4: 151347946	lincRNA: AC104819.3	2	['LRBA', 'MAB21L2', 'RPS3A', 'SH3D19', 'PRSS48']	['FAM160A1', 'AC092611.3', 'GATB', 'FBXW7', 'MIR4453HG']	['LRBA', 'MAB21L2', 'RPS3A', 'SH3D19', 'PRSS48', 'FAM160A1', 'AC092611.3', 'GATB', 'FBXW7', 'MIR4453HG']
50	43	TAGACCCACTTTCTTCCCAG	292	0.0124643	17	0.0317407	2.54652	chr1: 3136108	Open chromatin region: Open chromatin	2	['FAM213B', 'MMEL1', 'TTC34', 'ACTRT2', 'PRDM16']	['AL512383.1', 'ARHGEF16', 'MEGF6', 'TPRG1L', 'WRAP73']	['FAM213B', 'MMEL1', 'TTC34', 'ACTRT2', 'PRDM16', 'AL512383.1', 'ARHGEF16', 'MEGF6', 'TPRG1L', 'WRAP73']
51	44	TCTATTCCTTACCAGTAAAG	165	0.00704321	17	0.0317407	4.50657	chr8: 93022800		2	['OTUD6B', 'LRRC69', 'SLC26A7', 'RUNX1T1', 'TRIQK']	['FAM92A', 'RBM12B', 'RBM12B-AS1', 'TMEM67', 'PDP1']	['OTUD6B', 'LRRC69', 'SLC26A7', 'RUNX1T1', 'TRIQK', 'FAM92A', 'RBM12B', 'RBM12B-AS1', 'TMEM67', 'PDP1']
52	44	TCTATTCCTTACCAGTAAAG	165	0.00704321	17	0.0317407	4.50657	chr7: 112204523	Predicted promoter: Promoter	2	['DNAJB9', 'AC004014.2', 'IMMP2L', 'LRRN3', 'DOCK4']	['ZNF277', 'IFRD1', 'LSMEM1', 'TMEM168', 'BMT2']	['DNAJB9', 'AC004014.2', 'IMMP2L', 'LRRN3', 'DOCK4', 'ZNF277', 'IFRD1', 'LSMEM1', 'TMEM168', 'BMT2']
53	46	CCTGCAATTGCTCCTTGGCA	816	0.0348319	95	0.177374	5.09231	chrX: 57766898	processed_pseudogene: Z93019.1	2	['SPIN2B', 'SPIN2A', 'FAAH2', 'ZXDB', 'NLRP2B']	['ZXDA', 'SPIN4', 'ARHGEF9', 'AMER1', 'ASB12']	['SPIN2B', 'SPIN2A', 'FAAH2', 'ZXDB', 'NLRP2B', 'ZXDA', 'SPIN4', 'ARHGEF9', 'AMER1', 'ASB12']
54	47	GCTTCGGATCTACCTTTAAA	459	0.0195929	29	0.0541459	2.76354	chr6: 148677634	Transcription factor binding site: TF binding site	2	['RAB32', 'ADGB', 'STXBP5', 'SAMD5', 'SASH1']	['UST', 'TAB2', 'SUMO4', 'ZC3H12D', 'PPIL4']	['RAB32', 'ADGB', 'STXBP5', 'SAMD5', 'SASH1', 'UST', 'TAB2', 'SUMO4', 'ZC3H12D', 'PPIL4']
55	49	AGTATATTCTTGTCTACGGA	309	0.01319	18	0.0336078	2.54797	chr13: 106372978	Predicted promoter flanking region: Promoter Flanking Region	2	['BIVM', 'BIVM-ERCC5', 'ERCC5', 'SLC10A2', 'DAOA']	['EFNB2', 'ARGLU1', 'AL162574.3', 'FAM155A', 'LIG4']	['BIVM', 'BIVM-ERCC5', 'ERCC5', 'SLC10A2', 'DAOA', 'EFNB2', 'ARGLU1', 'AL162574.3', 'FAM155A', 'LIG4']
56	53	GGACTCTTCCTCTTTTTCGA	139	0.00593337	25	0.0466775	7.86695	chr8: 25769979		2	['NEFL', 'DOCK5', 'GNRH1', 'KCTD9', 'CDCA2']	['EBF2', 'PPP2R2A', 'BNIP3L', 'PNMA2', 'DPYSL2']	['NEFL', 'DOCK5', 'GNRH1', 'KCTD9', 'CDCA2', 'EBF2', 'PPP2R2A', 'BNIP3L', 'PNMA2', 'DPYSL2']
57	54	CTGTAATGTTTATTATGCCA	586	0.0250141	30	0.056013	2.23926	chr11: 102760189	transcribed_processed_pseudogene: WTAPP1	2	['TMEM123', 'MMP7', 'MMP20', 'MMP27', 'MMP8']	['MMP10', 'MMP1', 'MMP3', 'MMP12', 'MMP13']	['TMEM123', 'MMP7', 'MMP20', 'MMP27', 'MMP8', 'MMP10', 'MMP1', 'MMP3', 'MMP12', 'MMP13']
58	55	AATAAGCCTCCCCAGCTGAG	440	0.0187819	27	0.0504117	2.68406	chr1: 112197253	lincRNA: AL445426.1	2	['AL049557.1', 'INKA2-AS1', 'AL049557.2', 'DDX20', 'KCND3']	['CTTNBP2NL', 'WNT2B', 'ST7L', 'CAPZA1', 'MOV10']	['AL049557.1', 'INKA2-AS1', 'AL049557.2', 'DDX20', 'KCND3', 'CTTNBP2NL', 'WNT2B', 'ST7L', 'CAPZA1', 'MOV10']
59	57	CTGTCCATAGGATTAAGGAG	454	0.0193795	34	0.0634814	3.2757	chr6: 93537835		2	['CASP8AP2', 'GJA10', 'BACH2', 'MAP3K7', 'EPHA7']	['AL356094.1', 'AL078595.3', 'MANEA', 'FUT9', 'UFL1']	['CASP8AP2', 'GJA10', 'BACH2', 'MAP3K7', 'EPHA7', 'AL356094.1', 'AL078595.3', 'MANEA', 'FUT9', 'UFL1']
60	59	CGGCCTCTCATGCCTTGGCA	621	0.0265081	35	0.0653485	2.46523	chr1: 87426197		2	['SH3GLB1', 'SELENOF', 'HS2ST1', 'AC093155.3', 'LMO4']	['AL445437.1', 'PKN2', 'GTF2B', 'KYAT3', 'RBMXL1']	['SH3GLB1', 'SELENOF', 'HS2ST1', 'AC093155.3', 'LMO4', 'AL445437.1', 'PKN2', 'GTF2B', 'KYAT3', 'RBMXL1']
61	60	AGTGAAAACCTACCACACCA	387	0.0165195	23	0.0429433	2.59955	chr8: 55649699		2	['LYPLA1', 'MRPL15', 'SOX17', 'RP1', 'XKR4']	['TMEM68', 'TGS1', 'LYN', 'RPS20', 'MOS']	['LYPLA1', 'MRPL15', 'SOX17', 'RP1', 'XKR4', 'TMEM68', 'TGS1', 'LYN', 'RPS20', 'MOS']
62	62	CCTGTGTACATTCCATTGGA	746	0.0318438	77	0.143767	4.51474	chrY: 9626347	unprocessed_pseudogene: TSPY25P	2	['TSPY4', 'TSPY8', 'TSPY3', 'TSPY1', 'TSPY10']	['USP9Y', 'DDX3Y', 'UTY', 'TMSB4Y', 'VCY']	['TSPY4', 'TSPY8', 'TSPY3', 'TSPY1', 'TSPY10', 'USP9Y', 'DDX3Y', 'UTY', 'TMSB4Y', 'VCY']
63	64	CTGAGAAAACTCCAGTCCAG	506	0.0215992	46	0.0858866	3.97638	chr2: 9229295	Predicted promoter flanking region: Promoter Flanking Region	2	['RNF144A', 'ID2', 'KIDINS220', 'MBOAT2', 'ASAP2']	['ITGB1BP1', 'CPSF3', 'IAH1', 'ADAM17', 'YWHAQ']	['RNF144A', 'ID2', 'KIDINS220', 'MBOAT2', 'ASAP2', 'ITGB1BP1', 'CPSF3', 'IAH1', 'ADAM17', 'YWHAQ']
64	65	CTAGCCACAGTCTAGAGACA	651	0.0277887	63	0.117627	4.23293	chr3: 41965447		2	['ZNF619', 'ZNF620', 'ZNF621', 'CTNNB1', 'ULK4']	['TRAK1', 'CCK', 'LYZL4', 'VIPR1', 'SEC22C']	['ZNF619', 'ZNF620', 'ZNF621', 'CTNNB1', 'ULK4', 'TRAK1', 'CCK', 'LYZL4', 'VIPR1', 'SEC22C']
65	66	ATTCATAAAATCAAAAAGAG	180	0.0076835	13	0.0242723	3.15902	chr4: 126772179		2	['NUDT6', 'SPATA5', 'SPRY1', 'ANKRD50', 'FAT4']	['INTU', 'SLC25A31', 'HSPA4L', 'PLK4', 'MFSD8']	['NUDT6', 'SPATA5', 'SPRY1', 'ANKRD50', 'FAT4', 'INTU', 'SLC25A31', 'HSPA4L', 'PLK4', 'MFSD8']
66	66	ATTCATAAAATCAAAAAGAG	180	0.0076835	13	0.0242723	3.15902	chr15: 48650997	lincRNA: AC084757.3	2	['MYEF2', 'CTXN2', 'SLC12A1', 'DUT', 'FBN1']	['CEP152', 'SHC4', 'EID1', 'SECISBP2L', 'COPS2']	['MYEF2', 'CTXN2', 'SLC12A1', 'DUT', 'FBN1', 'CEP152', 'SHC4', 'EID1', 'SECISBP2L', 'COPS2']
67	66	ATTCATAAAATCAAAAAGAG	180	0.0076835	13	0.0242723	3.15902	chr15: 48650997	Open chromatin region: Open chromatin	2	['MYEF2', 'CTXN2', 'SLC12A1', 'DUT', 'FBN1']	['CEP152', 'SHC4', 'EID1', 'SECISBP2L', 'COPS2']	['MYEF2', 'CTXN2', 'SLC12A1', 'DUT', 'FBN1', 'CEP152', 'SHC4', 'EID1', 'SECISBP2L', 'COPS2']
68	67	TAAGAATCCCTCCTGATGAA	184	0.00785424	9	0.0168039	2.13947	chrY: 14928127		2	['UTY', 'TMSB4Y', 'VCY', 'VCY1B', 'NLGN4Y']	['CDY2B', 'CDY2A', 'HSFY1', 'HSFY2', 'KDM5D']	['UTY', 'TMSB4Y', 'VCY', 'VCY1B', 'NLGN4Y', 'CDY2B', 'CDY2A', 'HSFY1', 'HSFY2', 'KDM5D']
69	67	TAAGAATCCCTCCTGATGAA	184	0.00785424	9	0.0168039	2.13947	chr2: 64089673		2	['WDPCP', 'AC016734.2', 'MDH1', 'UGP2', 'VPS54']	['PELI1', 'LGALSL', 'AFTPH', 'SERTAD2', 'SLC1A4']	['WDPCP', 'AC016734.2', 'MDH1', 'UGP2', 'VPS54', 'PELI1', 'LGALSL', 'AFTPH', 'SERTAD2', 'SLC1A4']
70	68	ATTTATAAAATCAAAAAGAG	103	0.00439667	5	0.0093355	2.12331	chr7: 53810547	lincRNA: LINC01446	2	['FIGNL1', 'DDC', 'GRB10', 'COBL', 'POM121L12']	['VSTM2A', 'SEC61G', 'EGFR', 'LANCL2', 'VOPP1']	['FIGNL1', 'DDC', 'GRB10', 'COBL', 'POM121L12', 'VSTM2A', 'SEC61G', 'EGFR', 'LANCL2', 'VOPP1']
71	68	ATTTATAAAATCAAAAAGAG	103	0.00439667	5	0.0093355	2.12331	chr4: 126772179		2	['NUDT6', 'SPATA5', 'SPRY1', 'ANKRD50', 'FAT4']	['INTU', 'SLC25A31', 'HSPA4L', 'PLK4', 'MFSD8']	['NUDT6', 'SPATA5', 'SPRY1', 'ANKRD50', 'FAT4', 'INTU', 'SLC25A31', 'HSPA4L', 'PLK4', 'MFSD8']
72	68	ATTTATAAAATCAAAAAGAG	103	0.00439667	5	0.0093355	2.12331	chr2: 14517142	Open chromatin region: Open chromatin	2	['E2F6', 'GREB1', 'NTSR2', 'LPIN1', 'TRIB2']	['FAM84A', 'NBAS', 'DDX1', 'MYCN', 'AC104623.2']	['E2F6', 'GREB1', 'NTSR2', 'LPIN1', 'TRIB2', 'FAM84A', 'NBAS', 'DDX1', 'MYCN', 'AC104623.2']
73	68	ATTTATAAAATCAAAAAGAG	103	0.00439667	5	0.0093355	2.12331	chrX: 121507576		2	['CT47A4', 'CT47A3', 'CT47A2', 'CT47A1', 'GLUD2']	['AL357562.1', 'GRIA3', 'THOC2', 'XIAP', 'STAG2']	['CT47A4', 'CT47A3', 'CT47A2', 'CT47A1', 'GLUD2', 'AL357562.1', 'GRIA3', 'THOC2', 'XIAP', 'STAG2']
74	68	ATTTATAAAATCAAAAAGAG	103	0.00439667	5	0.0093355	2.12331	chr1: 198498227		2	['CRB1', 'DENND1B', 'C1orf53', 'LHX9', 'NEK7']	['ATP6V1G3', 'PTPRC', 'NR5A2', 'ZNF281', 'KIF14']	['CRB1', 'DENND1B', 'C1orf53', 'LHX9', 'NEK7', 'ATP6V1G3', 'PTPRC', 'NR5A2', 'ZNF281', 'KIF14']
75	69	CTATTTTTTTAATATCGAGG	180	0.0076835	11	0.0205381	2.67301	chr13: 70129939	antisense: ATXN8OS	2	['AL161901.1', 'PCDH20', 'AL592490.1', 'PCDH9', 'KLHL1']	['DACH1', 'MZT1', 'BORA', 'DIS3', 'PIBF1']	['AL161901.1', 'PCDH20', 'AL592490.1', 'PCDH9', 'KLHL1', 'DACH1', 'MZT1', 'BORA', 'DIS3', 'PIBF1']
76	70	GGACCTGAAAGTAAAACCCA	571	0.0243738	27	0.0504117	2.06828	chr14: 101263038	lincRNA: AL359682.1	2	['WARS', 'WDR25', 'BEGAIN', 'DLK1', 'RTL1']	['DIO3', 'PPP2R5C', 'DYNC1H1', 'HSP90AA1', 'WDR20']	['WARS', 'WDR25', 'BEGAIN', 'DLK1', 'RTL1', 'DIO3', 'PPP2R5C', 'DYNC1H1', 'HSP90AA1', 'WDR20']
77	72	TGAAACCGTCCTGCATTAAG	374	0.0159646	70	0.130697	8.18667	chr17: 9365346	Open chromatin region: Open chromatin	2	['MFSD6L', 'PIK3R6', 'PIK3R5', 'NTN1', 'STX8']	['CFAP52', 'USP43', 'DHRS7C', 'GSG1L2', 'GLP2R']	['MFSD6L', 'PIK3R6', 'PIK3R5', 'NTN1', 'STX8', 'CFAP52', 'USP43', 'DHRS7C', 'GSG1L2', 'GLP2R']
78	74	CGGTTCACATTTAATAAGAA	460	0.0196356	34	0.0634814	3.23297	chr6: 7037517		2	['FARS2', 'NRN1', 'F13A1', 'LY86', 'AL031123.3']	['RREB1', 'SSR1', 'CAGE1', 'RIOK1', 'DSP']	['FARS2', 'NRN1', 'F13A1', 'LY86', 'AL031123.3', 'RREB1', 'SSR1', 'CAGE1', 'RIOK1', 'DSP']
79	75	CTGGACCAAATGCCTCAAGG	725	0.0309474	42	0.0784182	2.53392	chr2: 231916829		2	['NMUR1', 'TEX44', 'PTMA', 'PDE6D', 'COPS7B']	['NPPC', 'DIS3L2', 'ALPP', 'ALPG', 'ALPI']	['NMUR1', 'TEX44', 'PTMA', 'PDE6D', 'COPS7B', 'NPPC', 'DIS3L2', 'ALPP', 'ALPG', 'ALPI']
80	77	TCTTCTCCCATGACTCACAG	228	0.00973243	25	0.0466775	4.79608	chr8: 107508647		2	['LRP12', 'ZFPM2', 'OXR1', 'ABRA', 'ANGPT1']	['RSPO2', 'EIF3E', 'EMC2', 'TMEM74', 'TRHR']	['LRP12', 'ZFPM2', 'OXR1', 'ABRA', 'ANGPT1', 'RSPO2', 'EIF3E', 'EMC2', 'TMEM74', 'TRHR']
81	79	TGAATTTCCTCGAATTTGCA	217	0.00926288	13	0.0242723	2.62038	chr1: 212621320		2	['DTL', 'PPP2R5A', 'TMEM206', 'NENF', 'ATF3']	['FAM71A', 'BATF3', 'NSL1', 'TATDN3', 'SPATA45']	['DTL', 'PPP2R5A', 'TMEM206', 'NENF', 'ATF3', 'FAM71A', 'BATF3', 'NSL1', 'TATDN3', 'SPATA45']
82	82	CTATCAGCAGTCCATTTCCA	441	0.0188246	21	0.0392091	2.08287	chr5: 135386659	Predicted promoter flanking region: Promoter Flanking Region	2	['PCBD2', 'AC006077.2', 'CATSPER3', 'PITX1', 'H2AFY']	['DCANP1', 'TIFAB', 'NEUROG1', 'CXCL14', 'SLC25A48']	['PCBD2', 'AC006077.2', 'CATSPER3', 'PITX1', 'H2AFY', 'DCANP1', 'TIFAB', 'NEUROG1', 'CXCL14', 'SLC25A48']
83	83	CTATCTCCCTCTTCATCACA	247	0.0105435	32	0.0597472	5.66675	chr5: 135386659	Predicted promoter flanking region: Promoter Flanking Region	2	['PCBD2', 'AC006077.2', 'CATSPER3', 'PITX1', 'H2AFY']	['DCANP1', 'TIFAB', 'NEUROG1', 'CXCL14', 'SLC25A48']	['PCBD2', 'AC006077.2', 'CATSPER3', 'PITX1', 'H2AFY', 'DCANP1', 'TIFAB', 'NEUROG1', 'CXCL14', 'SLC25A48']
84	83	CTATCTCCCTCTTCATCACA	247	0.0105435	32	0.0597472	5.66675	chr20: 49831124	Transcription factor binding site: TF binding site	2	['ZNFX1', 'KCNB1', 'PTGIS', 'B4GALT5', 'SLC9A8']	['SPATA2', 'RNF114', 'SNAI1', 'UBE2V1', 'TMEM189-UBE2V1']	['ZNFX1', 'KCNB1', 'PTGIS', 'B4GALT5', 'SLC9A8', 'SPATA2', 'RNF114', 'SNAI1', 'UBE2V1', 'TMEM189-UBE2V1']
85	86	AAATCAAGATCTTAACAAAA	425	0.0181416	22	0.0410762	2.2642	chrX: 44395117		2	['PPP1R2C', 'MAOA', 'MAOB', 'NDP', 'EFHC2']	['FUNDC1', 'DUSP21', 'KDM6A', 'CXorf36', 'KRBOX4']	['PPP1R2C', 'MAOA', 'MAOB', 'NDP', 'EFHC2', 'FUNDC1', 'DUSP21', 'KDM6A', 'CXorf36', 'KRBOX4']
86	88	CCTACGGTCATCCCATTGCA	596	0.0254409	54	0.100823	3.96304	chr5: 124953192	lincRNA: LINC02240	2	['PRDM6', 'CEP120', 'AC026422.1', 'CSNK1G3', 'ZNF608']	['GRAMD2B', 'AC093535.2', 'ALDH7A1', 'PHAX', 'TEX43']	['PRDM6', 'CEP120', 'AC026422.1', 'CSNK1G3', 'ZNF608', 'GRAMD2B', 'AC093535.2', 'ALDH7A1', 'PHAX', 'TEX43']
87	90	ACATAAAACAAACCAAACAG	394	0.0168183	56	0.104558	6.21689	chr1: 242753866		2	['WDR64', 'EXO1', 'BECN2', 'MAP1LC3C', 'PLD5']	['CEP170', 'SDCCAG8', 'AKT3', 'ZBTB18', 'AL590483.3']	['WDR64', 'EXO1', 'BECN2', 'MAP1LC3C', 'PLD5', 'CEP170', 'SDCCAG8', 'AKT3', 'ZBTB18', 'AL590483.3']
88	91	CATGATATAAAAGTATTGGG	143	0.00610411	11	0.0205381	3.36463	chr12: 102300105	macro_lncRNA: HELLPAR	2	['DRAM1', 'WASHC3', 'NUP37', 'PARPBP', 'PMCH']	['IGF1', 'PAH', 'ASCL1', 'C12orf42', 'STAB2']	['DRAM1', 'WASHC3', 'NUP37', 'PARPBP', 'PMCH', 'IGF1', 'PAH', 'ASCL1', 'C12orf42', 'STAB2']
89	92	CCATTTTTTCCCCCGATAGA	525	0.0224102	58	0.108292	4.83225	chr17: 48740801		2	['HOXB8', 'HOXB9', 'PRAC1', 'PRAC2', 'HOXB13']	['TTLL6', 'CALCOCO2', 'ATP5MC1', 'UBE2Z', 'SNF8']	['HOXB8', 'HOXB9', 'PRAC1', 'PRAC2', 'HOXB13', 'TTLL6', 'CALCOCO2', 'ATP5MC1', 'UBE2Z', 'SNF8']
90	93	ACTTTTCCTTACCAGTAAAG	275	0.0117387	22	0.0410762	3.49922	chr17: 48740801		2	['HOXB8', 'HOXB9', 'PRAC1', 'PRAC2', 'HOXB13']	['TTLL6', 'CALCOCO2', 'ATP5MC1', 'UBE2Z', 'SNF8']	['HOXB8', 'HOXB9', 'PRAC1', 'PRAC2', 'HOXB13', 'TTLL6', 'CALCOCO2', 'ATP5MC1', 'UBE2Z', 'SNF8']
91	94	CTTGCCATCCCGCATCCAGG	455	0.0194222	41	0.0765511	3.94143	chr3: 50633650	Predicted promoter flanking region: Promoter Flanking Region	2	['CACNA2D2', 'C3orf18', 'HEMK1', 'CISH', 'MAPKAPK3']	['DOCK3', 'MANF', 'RBM15B', 'DCAF1', 'RAD54L2']	['CACNA2D2', 'C3orf18', 'HEMK1', 'CISH', 'MAPKAPK3', 'DOCK3', 'MANF', 'RBM15B', 'DCAF1', 'RAD54L2']
92	95	CGAACACATGGATAGACGAA	690	0.0294534	44	0.0821524	2.78923	chr12: 54906319		2	['PDE1B', 'PPP1R1A', 'LACRT', 'DCD', 'MUCL1']	['TESPA1', 'NEUROD4', 'OR9K2', 'OR10A7', 'OR6C74']	['PDE1B', 'PPP1R1A', 'LACRT', 'DCD', 'MUCL1', 'TESPA1', 'NEUROD4', 'OR9K2', 'OR10A7', 'OR6C74']
93	96	CTGAGCAAACTCCAATCCAG	654	0.0279167	31	0.0578801	2.07331	chr2: 9229295	Predicted promoter flanking region: Promoter Flanking Region	2	['RNF144A', 'ID2', 'KIDINS220', 'MBOAT2', 'ASAP2']	['ITGB1BP1', 'CPSF3', 'IAH1', 'ADAM17', 'YWHAQ']	['RNF144A', 'ID2', 'KIDINS220', 'MBOAT2', 'ASAP2', 'ITGB1BP1', 'CPSF3', 'IAH1', 'ADAM17', 'YWHAQ']
94	97	CTTCTCATTTACAAGTACGG	304	0.0129766	29	0.0541459	4.17259	chr7: 45341971		2	['MYO1G', 'CCM2', 'NACAD', 'TBRG4', 'RAMP3']	['ADCY1', 'AC096582.3', 'IGFBP1', 'IGFBP3', 'TNS3']	['MYO1G', 'CCM2', 'NACAD', 'TBRG4', 'RAMP3', 'ADCY1', 'AC096582.3', 'IGFBP1', 'IGFBP3', 'TNS3']
95	98	GTTTCAGGATTTCTTCGAAA	244	0.0104154	28	0.0522788	5.01937	chr17: 54286803		2	['AC005839.1', 'UTP18', 'CA10', 'AC002090.1', 'KIF2B']	['TOM1L1', 'COX11', 'AC007485.2', 'STXBP4', 'HLF']	['AC005839.1', 'UTP18', 'CA10', 'AC002090.1', 'KIF2B', 'TOM1L1', 'COX11', 'AC007485.2', 'STXBP4', 'HLF']
96	99	AAGAACTCCAGTGCATCAGG	531	0.0226663	36	0.0672156	2.96544	chr3: 99082001		2	['CLDND1', 'CPOX', 'GPR15', 'ST3GAL6', 'DCBLD2']	['COL8A1', 'CMSS1', 'FILIP1L', 'TBC1D23', 'NIT2']	['CLDND1', 'CPOX', 'GPR15', 'ST3GAL6', 'DCBLD2', 'COL8A1', 'CMSS1', 'FILIP1L', 'TBC1D23', 'NIT2']
97	100	CTACTAGATTTGCTTCTGGA	487	0.0207881	37	0.0690827	3.32318	chr10: 58842471		2	['IPMK', 'CISD1', 'UBE2D1', 'TFAM', 'BICC1']	['PHYHIPL', 'FAM13C', 'SLC16A9', 'MRLN', 'CCDC6']	['IPMK', 'CISD1', 'UBE2D1', 'TFAM', 'BICC1', 'PHYHIPL', 'FAM13C', 'SLC16A9', 'MRLN', 'CCDC6']
98	102	GGGAGCCTCCTTGCGCTACA	449	0.0191661	42	0.0784182	4.09151	chr1: 15991245	unprocessed_pseudogene: TBC1D3P6	2	['TMEM82', 'FBLIM1', 'UQCRHL', 'SPEN', 'ZBTB17']	['SRARP', 'HSPB7', 'CLCNKA', 'CLCNKB', 'FAM131C']	['TMEM82', 'FBLIM1', 'UQCRHL', 'SPEN', 'ZBTB17', 'SRARP', 'HSPB7', 'CLCNKA', 'CLCNKB', 'FAM131C']
99	103	CCAAAGGCAGTGCAGCTCAG	451	0.0192514	22	0.0410762	2.13367	chr12: 58338965		2	['AVIL', 'CTDSP2', 'ATP23', 'AC090643.1', 'AC090643.2']	['LRIG3', 'SLC16A7', 'FAM19A2', 'USP15', 'MON2']	['AVIL', 'CTDSP2', 'ATP23', 'AC090643.1', 'AC090643.2', 'LRIG3', 'SLC16A7', 'FAM19A2', 'USP15', 'MON2']
100	103	CCAAAGGCAGTGCAGCTCAG	451	0.0192514	22	0.0410762	2.13367	chr6: 33377465	Open chromatin region: Open chromatin	2	['RGL2', 'TAPBP', 'ZBTB22', 'DAXX', 'AL662820.1']	['KIFC1', 'PHF1', 'CUTA', 'SYNGAP1', 'ZBTB9']	['RGL2', 'TAPBP', 'ZBTB22', 'DAXX', 'AL662820.1', 'KIFC1', 'PHF1', 'CUTA', 'SYNGAP1', 'ZBTB9']
101	104	CATGTTTATACTGTACACAA	247	0.0105435	13	0.0242723	2.30212	chr11: 71633812		2	['KRTAP5-7', 'KRTAP5-8', 'KRTAP5-9', 'KRTAP5-10', 'KRTAP5-11']	['FAM86C1', 'ZNF705E', 'DEFB108B', 'AP002495.2', 'DEFB131B']	['KRTAP5-7', 'KRTAP5-8', 'KRTAP5-9', 'KRTAP5-10', 'KRTAP5-11', 'FAM86C1', 'ZNF705E', 'DEFB108B', 'AP002495.2', 'DEFB131B']
102	104	CATGTTTATACTGTACACAA	247	0.0105435	13	0.0242723	2.30212	chr3: 75585884		2	['PPP4R2', 'EBLN2', 'PDZRN3', 'AC117489.1', 'CNTN3']	['FRG2C', 'ZNF717', 'ROBO2', 'ROBO1', 'GBE1']	['PPP4R2', 'EBLN2', 'PDZRN3', 'AC117489.1', 'CNTN3', 'FRG2C', 'ZNF717', 'ROBO2', 'ROBO1', 'GBE1']
103	104	CATGTTTATACTGTACACAA	247	0.0105435	13	0.0242723	2.30212	chr12: 8402372		2	['AC006511.3', 'CLEC4A', 'AC092111.3', 'ZNF705A', 'FAM90A1']	['CLEC6A', 'CLEC4D', 'CLEC4E', 'AICDA', 'AC092184.1']	['AC006511.3', 'CLEC4A', 'AC092111.3', 'ZNF705A', 'FAM90A1', 'CLEC6A', 'CLEC4D', 'CLEC4E', 'AICDA', 'AC092184.1']
104	105	TGGCAGAATTATTTGTAACA	434	0.0185258	21	0.0392091	2.11646	chr9: 92116400		2	['SYK', 'AUH', 'NFIL3', 'ROR2', 'SPTLC1']	['IARS', 'NOL8', 'CENPP', 'OGN', 'OMD']	['SYK', 'AUH', 'NFIL3', 'ROR2', 'SPTLC1', 'IARS', 'NOL8', 'CENPP', 'OGN', 'OMD']
105	106	ACACAGTAACCCCCTAAGAA	645	0.0275325	43	0.0802853	2.91602	chr5: 3009017		2	['NDUFS6', 'AC025183.4', 'IRX4', 'IRX2', 'C5orf38']	['IRX1', 'ADAMTS16', 'ICE1', 'AC026797.1', 'MED10']	['NDUFS6', 'AC025183.4', 'IRX4', 'IRX2', 'C5orf38', 'IRX1', 'ADAMTS16', 'ICE1', 'AC026797.1', 'MED10']
106	109	ATTTAAGATTGGCAATCAAA	411	0.017544	22	0.0410762	2.34133	chr17: 42423866		2	['STAT5B', 'AC099811.6', 'STAT5A', 'STAT3', 'CAVIN1']	['ATP6V0A1', 'NAGLU', 'HSD17B1', 'COASY', 'MLX']	['STAT5B', 'AC099811.6', 'STAT5A', 'STAT3', 'CAVIN1', 'ATP6V0A1', 'NAGLU', 'HSD17B1', 'COASY', 'MLX']
107	111	GCTGGGAACCTGGCTATAAA	494	0.0210869	41	0.0765511	3.63026	chrX: 40943975		2	['BCOR', 'ATP6AP2', 'MPC1L', 'CXorf38', 'MED14']	['USP9X', 'DDX3X', 'NYX', 'CASK', 'GPR34']	['BCOR', 'ATP6AP2', 'MPC1L', 'CXorf38', 'MED14', 'USP9X', 'DDX3X', 'NYX', 'CASK', 'GPR34']
108	112	TATTCAAATATACTTCCGCA	183	0.00781156	9	0.0168039	2.15116	chr4: 151347946	lincRNA: AC104819.3	2	['LRBA', 'MAB21L2', 'RPS3A', 'SH3D19', 'PRSS48']	['FAM160A1', 'AC092611.3', 'GATB', 'FBXW7', 'MIR4453HG']	['LRBA', 'MAB21L2', 'RPS3A', 'SH3D19', 'PRSS48', 'FAM160A1', 'AC092611.3', 'GATB', 'FBXW7', 'MIR4453HG']
109	113	CTGCAGGCTTTAAAGCGACA	860	0.03671	44	0.0821524	2.23787	chrX: 125186709		2	['XIAP', 'STAG2', 'SH2D1A', 'TEX13D', 'TENM1']	['TEX13C', 'AL645820.1', 'DCAF12L2', 'DCAF12L1', 'PRR32']	['XIAP', 'STAG2', 'SH2D1A', 'TEX13D', 'TENM1', 'TEX13C', 'AL645820.1', 'DCAF12L2', 'DCAF12L1', 'PRR32']
110	114	CCAGGGATACAAATGCCCAG	1150	0.049089	101	0.188577	3.84153	chr6: 143494096	processed_transcript: AL031320.2, transcribed_processed_pseudogene: VDAC1P8	2	['ADGRG6', 'HIVEP2', 'AIG1', 'ADAT2', 'PEX3']	['FUCA2', 'PHACTR2', 'AL049844.1', 'LTV1', 'AL049844.3']	['ADGRG6', 'HIVEP2', 'AIG1', 'ADAT2', 'PEX3', 'FUCA2', 'PHACTR2', 'AL049844.1', 'LTV1', 'AL049844.3']
111	115	AGAAGCCATTTAATTCCCCA	293	0.012507	18	0.0336078	2.68711	chr12: 9488657	processed_transcript: AC092821.3, transcribed_unprocessed_pseudogene: AC092821.1	2	['PHC1', 'M6PR', 'KLRG1', 'A2M', 'PZP']	['KLRB1', 'CLEC2D', 'CLECL1', 'CD69', 'KLRF1']	['PHC1', 'M6PR', 'KLRG1', 'A2M', 'PZP', 'KLRB1', 'CLEC2D', 'CLECL1', 'CD69', 'KLRF1']
112	116	CCTCATGAAGAACCAATACG	613	0.0261666	39	0.0728169	2.78282	chr12: 73821342	CTCF binding site: CTCF Binding Site	2	['TMEM19', 'RAB21', 'TBC1D15', 'TPH2', 'TRHDE']	['ATXN7L3B', 'KCNC2', 'CAPS2', 'GLIPR1L1', 'GLIPR1L2']	['TMEM19', 'RAB21', 'TBC1D15', 'TPH2', 'TRHDE', 'ATXN7L3B', 'KCNC2', 'CAPS2', 'GLIPR1L1', 'GLIPR1L2']
113	117	GGACCCATAACTACTCGGGG	475	0.0202759	56	0.104558	5.15674	chr7: 128939209	Predicted promoter: Promoter	2	['FLNC', 'KCP', 'ATP6V1F', 'ATP6V1FNB', 'IRF5']	['AC025594.2', 'TNPO3', 'AC011005.1', 'TSPAN33', 'SMO']	['FLNC', 'KCP', 'ATP6V1F', 'ATP6V1FNB', 'IRF5', 'AC025594.2', 'TNPO3', 'AC011005.1', 'TSPAN33', 'SMO']
114	119	TTATAGAGTTTCCTTTGCCA	221	0.00943363	20	0.037342	3.95839	chrX: 63133046		2	['SPIN2A', 'FAAH2', 'ZXDB', 'NLRP2B', 'ZXDA']	['SPIN4', 'ARHGEF9', 'AMER1', 'ASB12', 'MTMR8']	['SPIN2A', 'FAAH2', 'ZXDB', 'NLRP2B', 'ZXDA', 'SPIN4', 'ARHGEF9', 'AMER1', 'ASB12', 'MTMR8']
115	119	TTATAGAGTTTCCTTTGCCA	221	0.00943363	20	0.037342	3.95839	chr1: 157325675	Transcription factor binding site: TF binding site	2	['PEAR1', 'LRRC71', 'ARHGEF11', 'ETV3L', 'ETV3']	['FCRL5', 'FCRL4', 'FCRL3', 'FCRL2', 'FCRL1']	['PEAR1', 'LRRC71', 'ARHGEF11', 'ETV3L', 'ETV3', 'FCRL5', 'FCRL4', 'FCRL3', 'FCRL2', 'FCRL1']
116	119	TTATAGAGTTTCCTTTGCCA	221	0.00943363	20	0.037342	3.95839	chr11: 43950323	sense_overlapping: AC087521.3	2	['API5', 'TTC17', 'HSD17B12', 'ALKBH3', 'C11orf96']	['ACCSL', 'ACCS', 'EXT2', 'ALX4', 'CD82']	['API5', 'TTC17', 'HSD17B12', 'ALKBH3', 'C11orf96', 'ACCSL', 'ACCS', 'EXT2', 'ALX4', 'CD82']
117	119	TTATAGAGTTTCCTTTGCCA	221	0.00943363	20	0.037342	3.95839	chrX: 63245878		2	['SPIN2A', 'FAAH2', 'ZXDB', 'NLRP2B', 'ZXDA']	['SPIN4', 'ARHGEF9', 'AMER1', 'ASB12', 'MTMR8']	['SPIN2A', 'FAAH2', 'ZXDB', 'NLRP2B', 'ZXDA', 'SPIN4', 'ARHGEF9', 'AMER1', 'ASB12', 'MTMR8']
118	122	ACTATTCCTTACAAGTAAAG	299	0.0127631	27	0.0504117	3.94979	chr8: 93022800		2	['OTUD6B', 'LRRC69', 'SLC26A7', 'RUNX1T1', 'TRIQK']	['FAM92A', 'RBM12B', 'RBM12B-AS1', 'TMEM67', 'PDP1']	['OTUD6B', 'LRRC69', 'SLC26A7', 'RUNX1T1', 'TRIQK', 'FAM92A', 'RBM12B', 'RBM12B-AS1', 'TMEM67', 'PDP1']
119	123	GCTTTAGACAAAGTTCTGAA	343	0.0146413	18	0.0336078	2.29541	chr16: 4045089	Predicted promoter flanking region: Promoter Flanking Region	2	['SLX4', 'DNASE1', 'TRAP1', 'CREBBP', 'ADCY9']	['SRL', 'TFAP4', 'GLIS2', 'PAM16', 'CORO7-PAM16']	['SLX4', 'DNASE1', 'TRAP1', 'CREBBP', 'ADCY9', 'SRL', 'TFAP4', 'GLIS2', 'PAM16', 'CORO7-PAM16']
120	124	CTGTTCACAGGGGTGCAAAA	706	0.0301364	55	0.10269	3.40753	chr2: 236560246		2	['SH3BP4', 'AGAP1', 'GBX2', 'ASB18', 'IQCA1']	['ACKR3', 'COPS8', 'COL6A3', 'MLPH', 'PRLH']	['SH3BP4', 'AGAP1', 'GBX2', 'ASB18', 'IQCA1', 'ACKR3', 'COPS8', 'COL6A3', 'MLPH', 'PRLH']
121	128	TTTTATGATAACACTTTGGG	245	0.0104581	26	0.0485446	4.64182	chr6: 56941734	CTCF binding site: CTCF Binding Site	2	['GFRAL', 'HMGCLL1', 'BMP5', 'COL21A1', 'DST']	['BEND6', 'KIAA1586', 'ZNF451', 'BAG2', 'RAB23']	['GFRAL', 'HMGCLL1', 'BMP5', 'COL21A1', 'DST', 'BEND6', 'KIAA1586', 'ZNF451', 'BAG2', 'RAB23']
122	128	TTTTATGATAACACTTTGGG	245	0.0104581	26	0.0485446	4.64182	chr1: 116313674		2	['VANGL1', 'CASQ2', 'NHLH2', 'SLC22A15', 'MAB21L3']	['ATP1A1', 'CD58', 'IGSF3', 'CD2', 'PTGFRN']	['VANGL1', 'CASQ2', 'NHLH2', 'SLC22A15', 'MAB21L3', 'ATP1A1', 'CD58', 'IGSF3', 'CD2', 'PTGFRN']
123	128	TTTTATGATAACACTTTGGG	245	0.0104581	26	0.0485446	4.64182	chr15: 77090180		2	['SCAPER', 'RCN2', 'PSTPIP1', 'TSPAN3', 'AC090181.3']	['PEAK1', 'HMG20A', 'AC090984.1', 'LINGO1', 'AC105133.2']	['SCAPER', 'RCN2', 'PSTPIP1', 'TSPAN3', 'AC090181.3', 'PEAK1', 'HMG20A', 'AC090984.1', 'LINGO1', 'AC105133.2']
124	128	TTTTATGATAACACTTTGGG	245	0.0104581	26	0.0485446	4.64182	chr2: 25902572		2	['EFR3B', 'POMC', 'DNMT3A', 'DTNB', 'ASXL2']	['KIF3C', 'RAB10', 'GAREM2', 'HADHA', 'HADHB']	['EFR3B', 'POMC', 'DNMT3A', 'DTNB', 'ASXL2', 'KIF3C', 'RAB10', 'GAREM2', 'HADHA', 'HADHB']
125	128	TTTTATGATAACACTTTGGG	245	0.0104581	26	0.0485446	4.64182	chr6: 52197333		2	['DEFB112', 'TFAP2D', 'TFAP2B', 'PKHD1', 'IL17A']	['IL17F', 'MCM3', 'PAQR8', 'EFHC1', 'TRAM2']	['DEFB112', 'TFAP2D', 'TFAP2B', 'PKHD1', 'IL17A', 'IL17F', 'MCM3', 'PAQR8', 'EFHC1', 'TRAM2']
126	129	TCTGAATCTTTGGTTCACCG	214	0.00913483	17	0.0317407	3.47469	chr15: 48469213	Open chromatin region: Open chromatin	2	['MYEF2', 'CTXN2', 'SLC12A1', 'DUT', 'FBN1']	['CEP152', 'SHC4', 'EID1', 'SECISBP2L', 'COPS2']	['MYEF2', 'CTXN2', 'SLC12A1', 'DUT', 'FBN1', 'CEP152', 'SHC4', 'EID1', 'SECISBP2L', 'COPS2']
127	130	CATGTATGCTTGAAGTCCGA	333	0.0142145	17	0.0317407	2.23298	chr8: 81929599		2	['SLC10A5', 'AC132219.2', 'ZFAND1', 'CHMP4C', 'SNX16']	['RALYL', 'LRRCC1', 'E2F5', 'C8orf59', 'CA13']	['SLC10A5', 'AC132219.2', 'ZFAND1', 'CHMP4C', 'SNX16', 'RALYL', 'LRRCC1', 'E2F5', 'C8orf59', 'CA13']
128	132	CATTGACCCTTACTGTTCAA	457	0.0195075	40	0.074684	3.82847	chr13: 27396418	Transcription factor binding site: TF binding site	2	['WASF3', 'GPR12', 'USP12', 'RPL21', 'RASL11A']	['GTF3A', 'MTIF3', 'LNX2', 'POLR1D', 'GSX1']	['WASF3', 'GPR12', 'USP12', 'RPL21', 'RASL11A', 'GTF3A', 'MTIF3', 'LNX2', 'POLR1D', 'GSX1']
129	132	CATTGACCCTTACTGTTCAA	457	0.0195075	40	0.074684	3.82847	chr5: 58872998		2	['GPBP1', 'ACTBL2', 'PLK2', 'GAPT', 'RAB3C']	['PDE4D', 'DEPDC1B', 'ELOVL7', 'ERCC8', 'NDUFAF2']	['GPBP1', 'ACTBL2', 'PLK2', 'GAPT', 'RAB3C', 'PDE4D', 'DEPDC1B', 'ELOVL7', 'ERCC8', 'NDUFAF2']
130	133	CCTTAGGCAGGGCTTCTGAA	550	0.0234774	50	0.093355	3.97638	chr10: 103282011	: motif_Yy1, Predicted promoter flanking region: Promoter Flanking Region	2	['AS3MT', 'CNNM2', 'NT5C2', 'RPEL1', 'INA']	['PCGF6', 'TAF5', 'ATP5MD', 'PDCD11', 'CALHM2']	['AS3MT', 'CNNM2', 'NT5C2', 'RPEL1', 'INA', 'PCGF6', 'TAF5', 'ATP5MD', 'PDCD11', 'CALHM2']
131	134	AGTAATTGAGAGATACAAGG	567	0.024203	41	0.0765511	3.16287	chr10: 103282011	: motif_Yy1, Predicted promoter flanking region: Promoter Flanking Region	2	['AS3MT', 'CNNM2', 'NT5C2', 'RPEL1', 'INA']	['PCGF6', 'TAF5', 'ATP5MD', 'PDCD11', 'CALHM2']	['AS3MT', 'CNNM2', 'NT5C2', 'RPEL1', 'INA', 'PCGF6', 'TAF5', 'ATP5MD', 'PDCD11', 'CALHM2']
132	135	CTGATGTATTTCAAGCCCAG	342	0.0145986	25	0.0466775	3.19739	chr15: 25510318	lincRNA: LINC02250	2	['PWAR5', 'AC124312.6', 'PWAR1', 'AC124303.2', 'UBE3A']	['ATP10A', 'GABRB3', 'GABRA5', 'GABRG3', 'OCA2']	['PWAR5', 'AC124312.6', 'PWAR1', 'AC124303.2', 'UBE3A', 'ATP10A', 'GABRB3', 'GABRA5', 'GABRG3', 'OCA2']
133	136	TGGTTTGGAGGCAAGTGACA	342	0.0145986	20	0.037342	2.55791	chr15: 25510318	lincRNA: LINC02250	2	['PWAR5', 'AC124312.6', 'PWAR1', 'AC124303.2', 'UBE3A']	['ATP10A', 'GABRB3', 'GABRA5', 'GABRG3', 'OCA2']	['PWAR5', 'AC124312.6', 'PWAR1', 'AC124303.2', 'UBE3A', 'ATP10A', 'GABRB3', 'GABRA5', 'GABRG3', 'OCA2']
134	138	GCATAATTTACACAAACAGG	367	0.0156658	26	0.0485446	3.09876	chr2: 77774499		2	['TACR1', 'EVA1A', 'MRPL19', 'GCFC2', 'LRRTM4']	['REG3G', 'REG1B', 'REG1A', 'REG3A', 'CTNNA2']	['TACR1', 'EVA1A', 'MRPL19', 'GCFC2', 'LRRTM4', 'REG3G', 'REG1B', 'REG1A', 'REG3A', 'CTNNA2']
135	138	GCATAATTTACACAAACAGG	367	0.0156658	26	0.0485446	3.09876	chrX: 11911178		2	['MID1', 'HCCS', 'ARHGAP6', 'AMELX', 'MSL3']	['FRMPD4', 'PRPS2', 'TLR7', 'TLR8', 'TMSB4X']	['MID1', 'HCCS', 'ARHGAP6', 'AMELX', 'MSL3', 'FRMPD4', 'PRPS2', 'TLR7', 'TLR8', 'TMSB4X']
136	139	CAGGGAAACTGCGCTTGACA	875	0.0373503	54	0.100823	2.6994	chr9: 81564979	Open chromatin region: Open chromatin	2	['GNAQ', 'CEP78', 'PSAT1', 'TLE4', 'AL161912.4']	['TLE1', 'SPATA31D4', 'SPATA31D3', 'SPATA31D1', 'AL356490.1']	['GNAQ', 'CEP78', 'PSAT1', 'TLE4', 'AL161912.4', 'TLE1', 'SPATA31D4', 'SPATA31D3', 'SPATA31D1', 'AL356490.1']
137	141	CATAATATAAAAGTATTGAG	645	0.0275325	37	0.0690827	2.50913	chr6: 40603547		2	['KIF6', 'DAAM2', 'AL592158.1', 'MOCS1', 'LRFN2']	['UNC5CL', 'OARD1', 'TSPO2', 'APOBEC2', 'NFYA']	['KIF6', 'DAAM2', 'AL592158.1', 'MOCS1', 'LRFN2', 'UNC5CL', 'OARD1', 'TSPO2', 'APOBEC2', 'NFYA']
138	143	ATGACTAACAGGCCAACCAA	385	0.0164341	33	0.0616143	3.74916	chr15: 61231050		2	['BNIP2', 'FOXB1', 'ANXA2', 'ICE2', 'RORA']	['VPS13C', 'C2CD4A', 'C2CD4B', 'TLN2', 'TPM1']	['BNIP2', 'FOXB1', 'ANXA2', 'ICE2', 'RORA', 'VPS13C', 'C2CD4A', 'C2CD4B', 'TLN2', 'TPM1']
139	144	CTTCAGTTTGACGAAATGAG	689	0.0294107	55	0.10269	3.4916	chr11: 98600890		2	['CEP57', 'MTMR2', 'MAML2', 'CCDC82', 'JRKL']	['CNTN5', 'ARHGAP42', 'PGR', 'TRPC6', 'ANGPTL5']	['CEP57', 'MTMR2', 'MAML2', 'CCDC82', 'JRKL', 'CNTN5', 'ARHGAP42', 'PGR', 'TRPC6', 'ANGPTL5']
140	145	CCTGCTCCTGGTGATATGGG	705	0.0300937	49	0.0914879	3.0401	chr8: 120445481	Predicted promoter: Promoter	2	['AC021945.1', 'DEPTOR', 'COL14A1', 'MRPL13', 'MTBP']	['SNTB1', 'HAS2', 'ZHX2', 'DERL1', 'TBC1D31']	['AC021945.1', 'DEPTOR', 'COL14A1', 'MRPL13', 'MTBP', 'SNTB1', 'HAS2', 'ZHX2', 'DERL1', 'TBC1D31']
141	146	CCTACCCCACCAAAATCCCA	551	0.02352	32	0.0597472	2.54027	chr11: 72191212	Open chromatin region: Open chromatin	2	['LAMTOR1', 'AP000812.4', 'ANAPC15', 'FOLR3', 'FOLR1']	['FOLR2', 'INPPL1', 'PHOX2A', 'CLPB', 'PDE2A']	['LAMTOR1', 'AP000812.4', 'ANAPC15', 'FOLR3', 'FOLR1', 'FOLR2', 'INPPL1', 'PHOX2A', 'CLPB', 'PDE2A']
142	146	CCTACCCCACCAAAATCCCA	551	0.02352	32	0.0597472	2.54027	chr18: 60242180		2	['RAX', 'CPLX4', 'LMAN1', 'CCBE1', 'PMAIP1']	['MC4R', 'CDH20', 'RNF152', 'PIGN', 'KIAA1468']	['RAX', 'CPLX4', 'LMAN1', 'CCBE1', 'PMAIP1', 'MC4R', 'CDH20', 'RNF152', 'PIGN', 'KIAA1468']
143	146	CCTACCCCACCAAAATCCCA	551	0.02352	32	0.0597472	2.54027	chr7: 100337575	processed_transcript: STAG3L5P-PVRIG2P-PILRB, transcribed_unprocessed_pseudogene: STAG3L5P, unprocessed_pseudogene: PMS2P1	2	['GPC2', 'STAG3', 'CASTOR3', 'PVRIG', 'SPDYE3']	['PILRB', 'PILRA', 'ZCWPW1', 'MEPCE', 'PPP1R35']	['GPC2', 'STAG3', 'CASTOR3', 'PVRIG', 'SPDYE3', 'PILRB', 'PILRA', 'ZCWPW1', 'MEPCE', 'PPP1R35']
144	146	CCTACCCCACCAAAATCCCA	551	0.02352	32	0.0597472	2.54027	chrX: 19894167	Open chromatin region: Open chromatin	2	['PHKA2', 'ADGRG2', 'PDHA1', 'MAP3K15', 'SH3KBP1']	['BCLAF3', 'MAP7D2', 'EIF1AX', 'RPS6KA3', 'CNKSR2']	['PHKA2', 'ADGRG2', 'PDHA1', 'MAP3K15', 'SH3KBP1', 'BCLAF3', 'MAP7D2', 'EIF1AX', 'RPS6KA3', 'CNKSR2']
145	150	CATGATATAAAAGTATTAAG	419	0.0178855	24	0.0448104	2.50541	chr16: 50140415		2	['AC027348.2', 'AC007603.2', 'CNEP1R1', 'HEATR3', 'AC007610.4']	['TENT4B', 'ADCY7', 'BRD7', 'NKD1', 'AC007608.4']	['AC027348.2', 'AC007603.2', 'CNEP1R1', 'HEATR3', 'AC007610.4', 'TENT4B', 'ADCY7', 'BRD7', 'NKD1', 'AC007608.4']
146	151	ACACAGTCATGCTCTCACGA	995	0.0424727	57	0.106425	2.50572	chr1: 120521201	transcribed_unprocessed_pseudogene: AC241952.1	2	['HMGCS2', 'REG4', 'ADAM30', 'NOTCH2', 'SEC22B']	['NBPF26', 'PPIAL4A', 'AC241377.3', 'FCGR1B', 'FAM72B']	['HMGCS2', 'REG4', 'ADAM30', 'NOTCH2', 'SEC22B', 'NBPF26', 'PPIAL4A', 'AC241377.3', 'FCGR1B', 'FAM72B']
147	152	CGTCCAAATATGAAGAGGCA	197	0.00840916	35	0.0653485	7.77111	chr11: 91656449		2	['AP001002.1', 'AP001002.2', 'AP003485.2', 'AP003485.1', 'AP002791.1']	['AP002799.1', 'FAT3', 'MTNR1B', 'AP002371.1', 'AP003072.4']	['AP001002.1', 'AP001002.2', 'AP003485.2', 'AP003485.1', 'AP002791.1', 'AP002799.1', 'FAT3', 'MTNR1B', 'AP002371.1', 'AP003072.4']
148	153	AGAAACCATTTAATTCCCCA	336	0.0143425	18	0.0336078	2.34323	chr4: 147131329		2	['AC097372.4', 'SLC10A7', 'POU4F2', 'TTC29', 'AC092435.4']	['EDNRA', 'AC093908.1', 'TMEM184C', 'PRMT9', 'ARHGAP10']	['AC097372.4', 'SLC10A7', 'POU4F2', 'TTC29', 'AC092435.4', 'EDNRA', 'AC093908.1', 'TMEM184C', 'PRMT9', 'ARHGAP10']
149	154	CTGAGCAAACTACAGTCCAG	461	0.0196783	74	0.138165	7.02121	chr1: 165071923		2	['CCDC190', 'RGS4', 'RGS5', 'NUF2', 'PBX1']	['LMX1A', 'RXRG', 'LRRC52', 'MGST3', 'ALDH9A1']	['CCDC190', 'RGS4', 'RGS5', 'NUF2', 'PBX1', 'LMX1A', 'RXRG', 'LRRC52', 'MGST3', 'ALDH9A1']
150	154	CTGAGCAAACTACAGTCCAG	461	0.0196783	74	0.138165	7.02121	chr2: 9229295	Predicted promoter flanking region: Promoter Flanking Region	2	['RNF144A', 'ID2', 'KIDINS220', 'MBOAT2', 'ASAP2']	['ITGB1BP1', 'CPSF3', 'IAH1', 'ADAM17', 'YWHAQ']	['RNF144A', 'ID2', 'KIDINS220', 'MBOAT2', 'ASAP2', 'ITGB1BP1', 'CPSF3', 'IAH1', 'ADAM17', 'YWHAQ']
151	156	CGTGACAGCAGCATACTGAA	771	0.032911	38	0.0709498	2.15581	chr13: 87671102	lincRNA: MIR4500HG	2	['RBM26', 'NDFIP2', 'SPRY2', 'SLITRK1', 'SLITRK6']	['SLITRK5', 'GPC5', 'AL356118.1', 'AL157815.1', 'AL159152.1']	['RBM26', 'NDFIP2', 'SPRY2', 'SLITRK1', 'SLITRK6', 'SLITRK5', 'GPC5', 'AL356118.1', 'AL157815.1', 'AL159152.1']
152	156	CGTGACAGCAGCATACTGAA	771	0.032911	38	0.0709498	2.15581	chr13: 87671102	Predicted promoter: Promoter	2	['RBM26', 'NDFIP2', 'SPRY2', 'SLITRK1', 'SLITRK6']	['SLITRK5', 'GPC5', 'AL356118.1', 'AL157815.1', 'AL159152.1']	['RBM26', 'NDFIP2', 'SPRY2', 'SLITRK1', 'SLITRK6', 'SLITRK5', 'GPC5', 'AL356118.1', 'AL157815.1', 'AL159152.1']
153	156	CGTGACAGCAGCATACTGAA	771	0.032911	38	0.0709498	2.15581	chr13: 22795283		2	['SKA3', 'MRPL57', 'ZDHHC20', 'MICU2', 'FGF9']	['SGCG', 'SACS', 'TNFRSF19', 'MIPEP', 'C1QTNF9B']	['SKA3', 'MRPL57', 'ZDHHC20', 'MICU2', 'FGF9', 'SGCG', 'SACS', 'TNFRSF19', 'MIPEP', 'C1QTNF9B']
154	157	CTTCCGCCCTCGGCTTGGCA	266	0.0113545	15	0.0280065	2.46655	chr9: 4093437	Predicted enhancer region: Enhancer	2	['VLDLR', 'KCNV2', 'PUM3', 'RFX3', 'GLIS3']	['SLC1A1', 'SPATA6L', 'PLPP6', 'CDC37L1', 'AK3']	['VLDLR', 'KCNV2', 'PUM3', 'RFX3', 'GLIS3', 'SLC1A1', 'SPATA6L', 'PLPP6', 'CDC37L1', 'AK3']
155	158	CAGGGTGCCCATTCTAGGGA	812	0.0346611	59	0.110159	3.17817	chr7: 24467390		2	['TRA2A', 'CCDC126', 'FAM221A', 'STK31', 'NPY']	['MPP6', 'GSDME', 'OSBPL3', 'CYCS', 'C7orf31']	['TRA2A', 'CCDC126', 'FAM221A', 'STK31', 'NPY', 'MPP6', 'GSDME', 'OSBPL3', 'CYCS', 'C7orf31']
156	159	CCTCTCGCCAGCCATCTCAA	378	0.0161353	24	0.0448104	2.77716	chr20: 50212767		2	['SNAI1', 'UBE2V1', 'TMEM189-UBE2V1', 'TMEM189', 'CEBPB']	['PTPN1', 'RIPOR3', 'PARD6B', 'BCAS4', 'ADNP']	['SNAI1', 'UBE2V1', 'TMEM189-UBE2V1', 'TMEM189', 'CEBPB', 'PTPN1', 'RIPOR3', 'PARD6B', 'BCAS4', 'ADNP']
157	162	GCAGACCTTTAATCTTCAAG	430	0.018355	20	0.037342	2.03443	chr12: 63123236		2	['SLC16A7', 'FAM19A2', 'USP15', 'MON2', 'PPM1H']	['AVPR1A', 'AC135584.1', 'DPY19L2', 'RXYLT1', 'SRGAP1']	['SLC16A7', 'FAM19A2', 'USP15', 'MON2', 'PPM1H', 'AVPR1A', 'AC135584.1', 'DPY19L2', 'RXYLT1', 'SRGAP1']
158	163	AATAAATGTCTTGAGAACCA	221	0.00943363	26	0.0485446	5.14591	chr19: 7969061	Open chromatin region: Open chromatin	2	['TGFBR3L', 'SNAPC2', 'CTXN1', 'TIMM44', 'ELAVL1']	['CCL25', 'FBN3', 'CERS4', 'CD320', 'AC010323.1']	['TGFBR3L', 'SNAPC2', 'CTXN1', 'TIMM44', 'ELAVL1', 'CCL25', 'FBN3', 'CERS4', 'CD320', 'AC010323.1']
159	163	AATAAATGTCTTGAGAACCA	221	0.00943363	26	0.0485446	5.14591	chr5: 25439614	lincRNA: AC022140.1	2	['CDH12', 'PRDM9', 'CDH10', 'AC106754.2', 'AC022140.2']	['AC022418.1', 'CDH9', 'AC018765.1', 'CDH6', 'DROSHA']	['CDH12', 'PRDM9', 'CDH10', 'AC106754.2', 'AC022140.2', 'AC022418.1', 'CDH9', 'AC018765.1', 'CDH6', 'DROSHA']
160	164	GCAGAAGGTAGTAAGCCAAG	842	0.0359417	63	0.117627	3.27273	chr2: 53176953		2	['GTF2A1L', 'AC073082.1', 'LHCGR', 'FSHR', 'NRXN1']	['ASB3', 'GPR75-ASB3', 'CHAC2', 'ERLEC1', 'GPR75']	['GTF2A1L', 'AC073082.1', 'LHCGR', 'FSHR', 'NRXN1', 'ASB3', 'GPR75-ASB3', 'CHAC2', 'ERLEC1', 'GPR75']
161	165	CCGGCACCCATTCATCAAGG	674	0.0287704	41	0.0765511	2.66076	chr3: 147409323	CTCF binding site: CTCF Binding Site, Transcription factor binding site: TF binding site	2	['AC069528.2', 'PLSCR1', 'PLSCR5', 'ZIC4', 'ZIC1']	['AGTR1', 'CPB1', 'CPA3', 'GYG1', 'HLTF']	['AC069528.2', 'PLSCR1', 'PLSCR5', 'ZIC4', 'ZIC1', 'AGTR1', 'CPB1', 'CPA3', 'GYG1', 'HLTF']
162	166	GCAGTAAATGTGGTGAGAGG	711	0.0303498	40	0.074684	2.46077	chr5: 140091178	antisense: MALINC1	2	['TMEM173', 'UBE2D2', 'CXXC5', 'PSD2', 'NRG2']	['PURA', 'IGIP', 'CYSTM1', 'PFDN1', 'HBEGF']	['TMEM173', 'UBE2D2', 'CXXC5', 'PSD2', 'NRG2', 'PURA', 'IGIP', 'CYSTM1', 'PFDN1', 'HBEGF']
163	166	GCAGTAAATGTGGTGAGAGG	711	0.0303498	40	0.074684	2.46077	chr5: 140091178	CTCF binding site: CTCF Binding Site	2	['TMEM173', 'UBE2D2', 'CXXC5', 'PSD2', 'NRG2']	['PURA', 'IGIP', 'CYSTM1', 'PFDN1', 'HBEGF']	['TMEM173', 'UBE2D2', 'CXXC5', 'PSD2', 'NRG2', 'PURA', 'IGIP', 'CYSTM1', 'PFDN1', 'HBEGF']
164	166	GCAGTAAATGTGGTGAGAGG	711	0.0303498	40	0.074684	2.46077	chr9: 73908491		2	['GDA', 'ZFAND5', 'TMC1', 'ALDH1A1', 'ANXA1']	['RORB', 'TRPM6', 'C9orf40', 'CARNMT1', 'NMRK1']	['GDA', 'ZFAND5', 'TMC1', 'ALDH1A1', 'ANXA1', 'RORB', 'TRPM6', 'C9orf40', 'CARNMT1', 'NMRK1']
165	166	GCAGTAAATGTGGTGAGAGG	711	0.0303498	40	0.074684	2.46077	chr8: 24437438	antisense: AC120193.1	2	['NKX3-1', 'NKX2-6', 'STC1', 'ADAM28', 'ADAMDEC1']	['ADAM7', 'NEFM', 'NEFL', 'DOCK5', 'GNRH1']	['NKX3-1', 'NKX2-6', 'STC1', 'ADAM28', 'ADAMDEC1', 'ADAM7', 'NEFM', 'NEFL', 'DOCK5', 'GNRH1']
166	166	GCAGTAAATGTGGTGAGAGG	711	0.0303498	40	0.074684	2.46077	chr10: 26366309		2	['ENKUR', 'THNSL1', 'GPR158', 'MYO3A', 'GAD2']	['APBB1IP', 'AL390961.3', 'PDSS1', 'ABI1', 'ANKRD26']	['ENKUR', 'THNSL1', 'GPR158', 'MYO3A', 'GAD2', 'APBB1IP', 'AL390961.3', 'PDSS1', 'ABI1', 'ANKRD26']
167	168	CCTTGGTCAGGTATTCCCAG	387	0.0165195	35	0.0653485	3.95583	chr11: 55692835		2	['OR4C16', 'OR4C11', 'OR4P4', 'OR4S2', 'OR4C6']	['OR5D3P', 'OR5D13', 'OR5D14', 'OR5L1', 'OR5D18']	['OR4C16', 'OR4C11', 'OR4P4', 'OR4S2', 'OR4C6', 'OR5D3P', 'OR5D13', 'OR5D14', 'OR5L1', 'OR5D18']
168	169	CTGAGCAAACACCAGTCCAG	798	0.0340635	42	0.0784182	2.30212	chr2: 9229295	Predicted promoter flanking region: Promoter Flanking Region	2	['RNF144A', 'ID2', 'KIDINS220', 'MBOAT2', 'ASAP2']	['ITGB1BP1', 'CPSF3', 'IAH1', 'ADAM17', 'YWHAQ']	['RNF144A', 'ID2', 'KIDINS220', 'MBOAT2', 'ASAP2', 'ITGB1BP1', 'CPSF3', 'IAH1', 'ADAM17', 'YWHAQ']
169	170	CCTACTCCTCAATTTCCCCA	414	0.017672	26	0.0485446	2.74697	chr10: 131406357		2	['MGMT', 'EBF3', 'C10orf143', 'GLRX3', 'TCERG1L']	['AL607033.1', 'PPP2R2D', 'BNIP3', 'AL162274.3', 'JAKMIP3']	['MGMT', 'EBF3', 'C10orf143', 'GLRX3', 'TCERG1L', 'AL607033.1', 'PPP2R2D', 'BNIP3', 'AL162274.3', 'JAKMIP3']
170	170	CCTACTCCTCAATTTCCCCA	414	0.017672	26	0.0485446	2.74697	chr20: 45993823	Transcription factor binding site: TF binding site	2	['NEURL2', 'CTSA', 'PLTP', 'PCIF1', 'ZNF335']	['MMP9', 'SLC12A5', 'NCOA5', 'CD40', 'CDH22']	['NEURL2', 'CTSA', 'PLTP', 'PCIF1', 'ZNF335', 'MMP9', 'SLC12A5', 'NCOA5', 'CD40', 'CDH22']
171	170	CCTACTCCTCAATTTCCCCA	414	0.017672	26	0.0485446	2.74697	chrX: 143464562	antisense: AC239727.1	2	['SPANXD', 'MAGEC3', 'MAGEC1', 'MAGEC2', 'SPANXN4']	['SPANXN3', 'SLITRK4', 'SPANXN2', 'UBE2NL', 'SPANXN1']	['SPANXD', 'MAGEC3', 'MAGEC1', 'MAGEC2', 'SPANXN4', 'SPANXN3', 'SLITRK4', 'SPANXN2', 'UBE2NL', 'SPANXN1']
172	171	CTTTTCTACTATCTTAGAAG	156	0.00665903	36	0.0672156	10.0939	chrX: 66279221		2	['ZC3H12B', 'LAS1L', 'MSN', 'VSIG4', 'HEPH']	['EDA2R', 'AR', 'OPHN1', 'YIPF6', 'STARD8']	['ZC3H12B', 'LAS1L', 'MSN', 'VSIG4', 'HEPH', 'EDA2R', 'AR', 'OPHN1', 'YIPF6', 'STARD8']
173	174	TAAGACCCTATTCTTAAAGG	255	0.010885	12	0.0224052	2.05836	chr14: 22562728		2	['TRAJ4', 'TRAJ3', 'TRAJ2', 'TRAJ1', 'TRAC']	['DAD1', 'ABHD4', 'OR6J1', 'OXA1L', 'SLC7A7']	['TRAJ4', 'TRAJ3', 'TRAJ2', 'TRAJ1', 'TRAC', 'DAD1', 'ABHD4', 'OR6J1', 'OXA1L', 'SLC7A7']
174	175	CCTTTCTCACTTCCTCGACA	70	0.00298803	8	0.0149368	4.99888	chr2: 54560781	Predicted promoter: Promoter	2	['PSME4', 'ACYP2', 'TSPYL6', 'C2orf73', 'SPTBN1']	['EML6', 'RTN4', 'CLHC1', 'RPS27A', 'MTIF2']	['PSME4', 'ACYP2', 'TSPYL6', 'C2orf73', 'SPTBN1', 'EML6', 'RTN4', 'CLHC1', 'RPS27A', 'MTIF2']
175	175	CCTTTCTCACTTCCTCGACA	70	0.00298803	8	0.0149368	4.99888	chr1: 113299744		2	['AL603832.3', 'PPM1J', 'FAM19A3', 'SLC16A1', 'LRIG2']	['MAGI3', 'PHTF1', 'RSBN1', 'PTPN22', 'BCL2L15']	['AL603832.3', 'PPM1J', 'FAM19A3', 'SLC16A1', 'LRIG2', 'MAGI3', 'PHTF1', 'RSBN1', 'PTPN22', 'BCL2L15']
176	177	TGTGCAGGACCAGAGCCACA	573	0.0244591	29	0.0541459	2.21373	chr6: 168858621		2	['KIF25', 'FRMD1', 'DACT2', 'SMOC2', 'AL513210.1']	['AL109924.4', 'THBS2', 'WDR27', 'C6orf120', 'PHF10']	['KIF25', 'FRMD1', 'DACT2', 'SMOC2', 'AL513210.1', 'AL109924.4', 'THBS2', 'WDR27', 'C6orf120', 'PHF10']
177	177	TGTGCAGGACCAGAGCCACA	573	0.0244591	29	0.0541459	2.21373	chr1: 244734376		2	['C1orf100', 'ADSS', 'CATSPERE', 'DESI2', 'AL451007.3']	['COX20', 'HNRNPU', 'EFCAB2', 'KIF26B', 'SMYD3']	['C1orf100', 'ADSS', 'CATSPERE', 'DESI2', 'AL451007.3', 'COX20', 'HNRNPU', 'EFCAB2', 'KIF26B', 'SMYD3']
178	178	CCACAGTCATGCTCTCAGGA	718	0.0306486	49	0.0914879	2.98506	chr10: 129806134	lincRNA: AL157832.3	2	['FOXI2', 'CLRN3', 'PTPRE', 'MKI67', 'MGMT']	['EBF3', 'C10orf143', 'GLRX3', 'TCERG1L', 'AL607033.1']	['FOXI2', 'CLRN3', 'PTPRE', 'MKI67', 'MGMT', 'EBF3', 'C10orf143', 'GLRX3', 'TCERG1L', 'AL607033.1']
179	179	TATATTAATACCATATAGAG	118	0.00503696	9	0.0168039	3.33612	chr18: 24627962	Open chromatin region: Open chromatin	2	['AC090772.4', 'CABYR', 'OSBPL1A', 'IMPACT', 'HRH4']	['ZNF521', 'AC105114.1', 'SS18', 'PSMA8', 'TAF4B']	['AC090772.4', 'CABYR', 'OSBPL1A', 'IMPACT', 'HRH4', 'ZNF521', 'AC105114.1', 'SS18', 'PSMA8', 'TAF4B']
180	179	TATATTAATACCATATAGAG	118	0.00503696	9	0.0168039	3.33612	chr12: 129976375		2	['AC108704.2', 'GLT1D1', 'TMEM132D', 'AC079456.1', 'AC055717.3']	['AC026336.4', 'AC026336.5', 'FZD10', 'PIWIL1', 'AC127071.1']	['AC108704.2', 'GLT1D1', 'TMEM132D', 'AC079456.1', 'AC055717.3', 'AC026336.4', 'AC026336.5', 'FZD10', 'PIWIL1', 'AC127071.1']
181	179	TATATTAATACCATATAGAG	118	0.00503696	9	0.0168039	3.33612	chr22: 45464960		2	['KIAA0930', 'UPK3A', 'FAM118A', 'SMC1B', 'RIBC2']	['FBLN1', 'ATXN10', 'WNT7B', 'BX537318.2', 'PRR34']	['KIAA0930', 'UPK3A', 'FAM118A', 'SMC1B', 'RIBC2', 'FBLN1', 'ATXN10', 'WNT7B', 'BX537318.2', 'PRR34']
182	180	CTGAGGAGTTGCTCGAGACA	830	0.0354295	49	0.0914879	2.58225	chr17: 77894431		2	['AC016168.3', 'SEC14L1', 'SEPT9', 'AC111170.3', 'AC021683.4']	['TNRC6C', 'AC015804.1', 'TMC6', 'TMC8', 'C17orf99']	['AC016168.3', 'SEC14L1', 'SEPT9', 'AC111170.3', 'AC021683.4', 'TNRC6C', 'AC015804.1', 'TMC6', 'TMC8', 'C17orf99']
183	182	CCTCTATAACATAATATAAG	420	0.0179282	64	0.119494	6.66518	chr3: 87719043		2	['GBE1', 'CADM2', 'VGLL3', 'CHMP2B', 'POU1F1']	['HTR1F', 'CGGBP1', 'ZNF654', 'C3orf38', 'CSNKA2IP']	['GBE1', 'CADM2', 'VGLL3', 'CHMP2B', 'POU1F1', 'HTR1F', 'CGGBP1', 'ZNF654', 'C3orf38', 'CSNKA2IP']
184	183	CGACAAACTTATCTGTGCAG	625	0.0266788	58	0.108292	4.05909	chr3: 87719043		2	['GBE1', 'CADM2', 'VGLL3', 'CHMP2B', 'POU1F1']	['HTR1F', 'CGGBP1', 'ZNF654', 'C3orf38', 'CSNKA2IP']	['GBE1', 'CADM2', 'VGLL3', 'CHMP2B', 'POU1F1', 'HTR1F', 'CGGBP1', 'ZNF654', 'C3orf38', 'CSNKA2IP']
185	184	CGACTGTATTAACTGACAGG	572	0.0244164	27	0.0504117	2.06466	chr1: 98021128	lincRNA: MIR137HG	2	['TMEM56', 'TMEM56-RWDD3', 'RWDD3', 'PTBP2', 'DPYD']	['AC095031.1', 'SNX7', 'PLPPR5', 'PLPPR4', 'PALMD']	['TMEM56', 'TMEM56-RWDD3', 'RWDD3', 'PTBP2', 'DPYD', 'AC095031.1', 'SNX7', 'PLPPR5', 'PLPPR4', 'PALMD']
186	185	CATATCCTTAAGAATTAGCA	481	0.020532	25	0.0466775	2.2734	chr9: 99202085		2	['GABBR2', 'ANKS6', 'GALNT12', 'COL15A1', 'TGFBR1']	['ALG2', 'SEC61B', 'NR4A3', 'STX17', 'ERP44']	['GABBR2', 'ANKS6', 'GALNT12', 'COL15A1', 'TGFBR1', 'ALG2', 'SEC61B', 'NR4A3', 'STX17', 'ERP44']
187	188	TCAAGTAAAGGTGTGCACAG	505	0.0215565	25	0.0466775	2.16536	chr3: 114219595	antisense: AC093010.2	2	['GRAMD1C', 'ZDHHC23', 'CCDC191', 'QTRT2', 'DRD3']	['ZNF80', 'TIGIT', 'ZBTB20', 'AC093010.3', 'GAP43']	['GRAMD1C', 'ZDHHC23', 'CCDC191', 'QTRT2', 'DRD3', 'ZNF80', 'TIGIT', 'ZBTB20', 'AC093010.3', 'GAP43']
188	189	CAAGGTATTGAAGCTAAAAG	584	0.0249287	77	0.143767	5.76712	chr3: 114219595	antisense: AC093010.2	2	['GRAMD1C', 'ZDHHC23', 'CCDC191', 'QTRT2', 'DRD3']	['ZNF80', 'TIGIT', 'ZBTB20', 'AC093010.3', 'GAP43']	['GRAMD1C', 'ZDHHC23', 'CCDC191', 'QTRT2', 'DRD3', 'ZNF80', 'TIGIT', 'ZBTB20', 'AC093010.3', 'GAP43']
189	189	CAAGGTATTGAAGCTAAAAG	584	0.0249287	77	0.143767	5.76712	chr3: 114219595	antisense: AC093010.2	2	['GRAMD1C', 'ZDHHC23', 'CCDC191', 'QTRT2', 'DRD3']	['ZNF80', 'TIGIT', 'ZBTB20', 'AC093010.3', 'GAP43']	['GRAMD1C', 'ZDHHC23', 'CCDC191', 'QTRT2', 'DRD3', 'ZNF80', 'TIGIT', 'ZBTB20', 'AC093010.3', 'GAP43']
190	190	CCGCTAGTATAAGAAAAGGG	2019	0.0861832	174	0.324875	3.76959	chr1: 202938530	Open chromatin region: Open chromatin	2	['PPP1R12B', 'SYT2', 'KDM5B', 'RABIF', 'KLHL12']	['ADIPOR1', 'CYB5R1', 'TMEM183A', 'PPFIA4', 'MYOG']	['PPP1R12B', 'SYT2', 'KDM5B', 'RABIF', 'KLHL12', 'ADIPOR1', 'CYB5R1', 'TMEM183A', 'PPFIA4', 'MYOG']
191	194	CTGGACCACATTGCAAGAGA	755	0.032228	41	0.0765511	2.3753	chr10: 87294109	antisense: NUTM2A-AS1	2	['ADIRF', 'FAM25A', 'GLUD1', 'SHLD2', 'NUTM2A']	['LINC00863', 'NUTM2D', 'MINPP1', 'PAPSS2', 'ATAD1']	['ADIRF', 'FAM25A', 'GLUD1', 'SHLD2', 'NUTM2A', 'LINC00863', 'NUTM2D', 'MINPP1', 'PAPSS2', 'ATAD1']
192	194	CTGGACCACATTGCAAGAGA	755	0.032228	41	0.0765511	2.3753	chr10: 79771960	antisense: NUTM2B-AS1	2	['EIF5AL1', 'SFTPA2', 'SFTPA1', 'AL132656.4', 'NUTM2B']	['NUTM2E', 'SFTPD', 'AL512662.1', 'TMEM254', 'AL356095.2']	['EIF5AL1', 'SFTPA2', 'SFTPA1', 'AL132656.4', 'NUTM2B', 'NUTM2E', 'SFTPD', 'AL512662.1', 'TMEM254', 'AL356095.2']
193	194	CTGGACCACATTGCAAGAGA	755	0.032228	41	0.0765511	2.3753	chr10: 87443841		2	['GLUD1', 'SHLD2', 'NUTM2A', 'LINC00863', 'NUTM2D']	['MINPP1', 'PAPSS2', 'ATAD1', 'KLLN', 'PTEN']	['GLUD1', 'SHLD2', 'NUTM2A', 'LINC00863', 'NUTM2D', 'MINPP1', 'PAPSS2', 'ATAD1', 'KLLN', 'PTEN']
194	196	GAGCATAAATGTTATAGCGA	595	0.0253982	68	0.126963	4.99888	chrX: 66937900		2	['LAS1L', 'MSN', 'VSIG4', 'HEPH', 'EDA2R']	['AR', 'OPHN1', 'YIPF6', 'STARD8', 'EFNB1']	['LAS1L', 'MSN', 'VSIG4', 'HEPH', 'EDA2R', 'AR', 'OPHN1', 'YIPF6', 'STARD8', 'EFNB1']
195	197	CTGCCTGCCCGGTCTCCCAA	587	0.0250567	35	0.0653485	2.60802	chr4: 139651636	Predicted promoter flanking region: Promoter Flanking Region, CTCF binding site: CTCF Binding Site	2	['MGARP', 'NDUFC1', 'NAA15', 'RAB33B', 'SETD7']	['MGST2', 'MAML3', 'SCOC', 'CLGN', 'MGAT4D']	['MGARP', 'NDUFC1', 'NAA15', 'RAB33B', 'SETD7', 'MGST2', 'MAML3', 'SCOC', 'CLGN', 'MGAT4D']
196	197	CTGCCTGCCCGGTCTCCCAA	587	0.0250567	35	0.0653485	2.60802	chr11: 6713375		2	['ILK', 'TAF10', 'TPP1', 'DCHS1', 'MRPL17']	['OR2AG2', 'OR2AG1', 'OR6A2', 'OR10A5', 'OR10A2']	['ILK', 'TAF10', 'TPP1', 'DCHS1', 'MRPL17', 'OR2AG2', 'OR2AG1', 'OR6A2', 'OR10A5', 'OR10A2']
197	200	TAGATGTAAGACCATAACGA	487	0.0207881	36	0.0672156	3.23336	chr2: 41469032		2	['CDKL4', 'MAP4K3', 'TMEM178A', 'THUMPD2', 'SLC8A1']	['C2orf91', 'PKDCC', 'EML4', 'COX7A2L', 'KCNG3']	['CDKL4', 'MAP4K3', 'TMEM178A', 'THUMPD2', 'SLC8A1', 'C2orf91', 'PKDCC', 'EML4', 'COX7A2L', 'KCNG3']
198	201	AGTACTAAAGATATTTAAAG	237	0.0101166	34	0.0634814	6.27497	chr14: 62172322		2	['AL355916.3', 'HIF1A', 'SNAPC1', 'AL137918.1', 'SYT16']	['KCNH5', 'RHOJ', 'GPHB5', 'PPP2R5E', 'WDR89']	['AL355916.3', 'HIF1A', 'SNAPC1', 'AL137918.1', 'SYT16', 'KCNH5', 'RHOJ', 'GPHB5', 'PPP2R5E', 'WDR89']
199	202	CTGAGCAAACTCCAGTACAG	604	0.0257824	40	0.074684	2.8967	chr2: 9229295	Predicted promoter flanking region: Promoter Flanking Region	2	['RNF144A', 'ID2', 'KIDINS220', 'MBOAT2', 'ASAP2']	['ITGB1BP1', 'CPSF3', 'IAH1', 'ADAM17', 'YWHAQ']	['RNF144A', 'ID2', 'KIDINS220', 'MBOAT2', 'ASAP2', 'ITGB1BP1', 'CPSF3', 'IAH1', 'ADAM17', 'YWHAQ']
200	203	CGATACTTCATATTGAAAAG	406	0.0173306	73	0.136298	7.86462	chr6: 155556696		2	['SCAF8', 'TIAM2', 'TFB1M', 'CLDN20', 'NOX3']	['ARID1B', 'TMEM242', 'ZDHHC14', 'SNX9', 'SYNJ2']	['SCAF8', 'TIAM2', 'TFB1M', 'CLDN20', 'NOX3', 'ARID1B', 'TMEM242', 'ZDHHC14', 'SNX9', 'SYNJ2']
201	204	ACAGGGGACGGCAAGTTACA	971	0.0414482	60	0.112026	2.70279	chrX: 30790464		2	['MAGEB4', 'MAGEB1', 'NR0B1', 'CXorf21', 'GK']	['TAB3', 'FTHL17', 'DMD', 'FAM47A', 'TMEM47']	['MAGEB4', 'MAGEB1', 'NR0B1', 'CXorf21', 'GK', 'TAB3', 'FTHL17', 'DMD', 'FAM47A', 'TMEM47']
202	207	CTACGCACCCCATAGCTGCA	336	0.0143425	24	0.0448104	3.1243	chr3: 161561866		2	['PPM1L', 'B3GALNT1', 'NMD3', 'SPTSSB', 'OTOL1']	['SI', 'SLITRK3', 'BCHE', 'ZBBX', 'SERPINI2']	['PPM1L', 'B3GALNT1', 'NMD3', 'SPTSSB', 'OTOL1', 'SI', 'SLITRK3', 'BCHE', 'ZBBX', 'SERPINI2']
203	208	CTGTCTACTCCACTTCAGAA	347	0.0148121	41	0.0765511	5.16815	chr5: 133784509		2	['HSPA4', 'AC113410.3', 'FSTL4', 'AC010608.3', 'AC010608.2']	['C5orf15', 'VDAC1', 'TCF7', 'SKP1', 'AC104109.3']	['HSPA4', 'AC113410.3', 'FSTL4', 'AC010608.3', 'AC010608.2', 'C5orf15', 'VDAC1', 'TCF7', 'SKP1', 'AC104109.3']
204	209	AATGCATCAGCGCAGCACAG	536	0.0228797	48	0.0896208	3.91704	chr16: 30021011	Predicted promoter: Promoter	2	['TMEM219', 'TAOK2', 'HIRIP3', 'INO80E', 'DOC2A']	['C16orf92', 'FAM57B', 'AC093512.2', 'ALDOA', 'PPP4C']	['TMEM219', 'TAOK2', 'HIRIP3', 'INO80E', 'DOC2A', 'C16orf92', 'FAM57B', 'AC093512.2', 'ALDOA', 'PPP4C']
205	210	CCTGCCGTCATTATACACCA	530	0.0226236	44	0.0821524	3.63126	chr17: 80400548	antisense: AC124319.2	2	['CARD14', 'SGSH', 'SLC26A11', 'RNF213', 'AC124319.4']	['ENDOV', 'AC120024.4', 'NPTX1', 'RPTOR', 'CHMP6']	['CARD14', 'SGSH', 'SLC26A11', 'RNF213', 'AC124319.4', 'ENDOV', 'AC120024.4', 'NPTX1', 'RPTOR', 'CHMP6']
206	210	CCTGCCGTCATTATACACCA	530	0.0226236	44	0.0821524	3.63126	chr17: 19893113		2	['ALDH3A2', 'SLC47A2', 'ALDH3A1', 'ULK2', 'AC015726.3']	['AKAP10', 'SPECC1', 'LGALS9B', 'CDRT15L2', 'CCDC144NL']	['ALDH3A2', 'SLC47A2', 'ALDH3A1', 'ULK2', 'AC015726.3', 'AKAP10', 'SPECC1', 'LGALS9B', 'CDRT15L2', 'CCDC144NL']
207	213	AAGGATAAAGCAGTAAACAA	673	0.0287277	32	0.0597472	2.07977	chr5: 44763778	lincRNA: AC093297.1, antisense: MRPS30-DT	2	['C5orf34', 'PAIP1', 'AC010435.1', 'NNT', 'FGF10']	['MRPS30', 'HCN1', 'EMB', 'PARP8', 'ISL1']	['C5orf34', 'PAIP1', 'AC010435.1', 'NNT', 'FGF10', 'MRPS30', 'HCN1', 'EMB', 'PARP8', 'ISL1']
208	213	AAGGATAAAGCAGTAAACAA	673	0.0287277	32	0.0597472	2.07977	chr21: 24424088		2	['C21orf91', 'CHODL', 'TMPRSS15', 'AL157359.3', 'NCAM2']	['AP001340.1', 'MRPL39', 'JAM2', 'ATP5PF', 'GABPA']	['C21orf91', 'CHODL', 'TMPRSS15', 'AL157359.3', 'NCAM2', 'AP001340.1', 'MRPL39', 'JAM2', 'ATP5PF', 'GABPA']
209	214	GATCGACAATCTCAGTCAGG	470	0.0200625	33	0.0616143	3.07112	chr6: 21813553	lincRNA: CASC15	2	['ID4', 'MBOAT1', 'E2F3', 'CDKAL1', 'SOX4']	['AL136313.1', 'PRL', 'HDGFL1', 'NRSN1', 'DCDC2']	['ID4', 'MBOAT1', 'E2F3', 'CDKAL1', 'SOX4', 'AL136313.1', 'PRL', 'HDGFL1', 'NRSN1', 'DCDC2']
210	214	GATCGACAATCTCAGTCAGG	470	0.0200625	33	0.0616143	3.07112	chr1: 147385106	antisense: LINC00624	2	['AC243756.1', 'NBPF12', 'PRKAB2', 'FMO5', 'CHD1L']	['BCL9', 'ACP6', 'GJA5', 'GJA8', 'GPR89B']	['AC243756.1', 'NBPF12', 'PRKAB2', 'FMO5', 'CHD1L', 'BCL9', 'ACP6', 'GJA5', 'GJA8', 'GPR89B']
211	216	CGGAGGCCTCCGACTAGAAG	488	0.0208308	30	0.056013	2.68895	chr10: 73358465	Predicted promoter: Promoter	2	['ECD', 'FAM149B1', 'DNAJC9', 'MRPS16', 'CFAP70']	['ANXA7', 'MSS51', 'PPP3CB', 'USP54', 'MYOZ1']	['ECD', 'FAM149B1', 'DNAJC9', 'MRPS16', 'CFAP70', 'ANXA7', 'MSS51', 'PPP3CB', 'USP54', 'MYOZ1']
212	217	CTGCCTGTTGCCAAGAGCAG	492	0.0210016	53	0.0989563	4.71185	chr10: 73358465	Predicted promoter: Promoter	2	['ECD', 'FAM149B1', 'DNAJC9', 'MRPS16', 'CFAP70']	['ANXA7', 'MSS51', 'PPP3CB', 'USP54', 'MYOZ1']	['ECD', 'FAM149B1', 'DNAJC9', 'MRPS16', 'CFAP70', 'ANXA7', 'MSS51', 'PPP3CB', 'USP54', 'MYOZ1']
213	217	CTGCCTGTTGCCAAGAGCAG	492	0.0210016	53	0.0989563	4.71185	chr3: 120004057	Predicted promoter flanking region: Promoter Flanking Region	2	['POPDC2', 'COX17', 'MAATS1', 'NR1I2', 'GSK3B']	['GPR156', 'LRRC58', 'FSTL1', 'NDUFB4', 'HGD']	['POPDC2', 'COX17', 'MAATS1', 'NR1I2', 'GSK3B', 'GPR156', 'LRRC58', 'FSTL1', 'NDUFB4', 'HGD']
214	218	CCTGACGTCATTATTCACCA	472	0.0201478	53	0.0989563	4.91151	chr5: 71533831	Open chromatin region: Open chromatin	2	['SERF1A', 'SMN1', 'NAIP', 'GTF2H2', 'BDP1']	['MCCC2', 'CARTPT', 'MAP1B', 'MRPS27', 'PTCD2']	['SERF1A', 'SMN1', 'NAIP', 'GTF2H2', 'BDP1', 'MCCC2', 'CARTPT', 'MAP1B', 'MRPS27', 'PTCD2']
215	219	CATGGGCCACGTTTGTTCGA	606	0.0258678	57	0.106425	4.11418	chr12: 92283942	lincRNA: LINC02391	2	['EPYC', 'KERA', 'LUM', 'DCN', 'BTG1']	['CLLU1OS', 'C12orf74', 'PLEKHG7', 'EEA1', 'NUDT4']	['EPYC', 'KERA', 'LUM', 'DCN', 'BTG1', 'CLLU1OS', 'C12orf74', 'PLEKHG7', 'EEA1', 'NUDT4']
216	220	CGATATTGACCTCCACAGAG	429	0.0183123	25	0.0466775	2.54896	chr3: 73290817		2	['RYBP', 'SHQ1', 'GXYLT2', 'PPP4R2', 'EBLN2']	['PDZRN3', 'AC117489.1', 'CNTN3', 'FRG2C', 'ZNF717']	['RYBP', 'SHQ1', 'GXYLT2', 'PPP4R2', 'EBLN2', 'PDZRN3', 'AC117489.1', 'CNTN3', 'FRG2C', 'ZNF717']
217	221	ACTGCGAATCTTCAGCCAGG	493	0.0210442	45	0.0840195	3.99252	chr12: 72740808		2	['TMEM19', 'RAB21', 'TBC1D15', 'TPH2', 'TRHDE']	['ATXN7L3B', 'KCNC2', 'CAPS2', 'GLIPR1L1', 'GLIPR1L2']	['TMEM19', 'RAB21', 'TBC1D15', 'TPH2', 'TRHDE', 'ATXN7L3B', 'KCNC2', 'CAPS2', 'GLIPR1L1', 'GLIPR1L2']
218	221	ACTGCGAATCTTCAGCCAGG	493	0.0210442	45	0.0840195	3.99252	chr4: 42786482		2	['DCAF4L1', 'SLC30A9', 'BEND4', 'SHISA3', 'ATP8A1']	['GRXCR1', 'KCTD8', 'YIPF7', 'GUF1', 'GNPDA2']	['DCAF4L1', 'SLC30A9', 'BEND4', 'SHISA3', 'ATP8A1', 'GRXCR1', 'KCTD8', 'YIPF7', 'GUF1', 'GNPDA2']
219	222	AGGAGCCTTCCTTTTTTAGA	360	0.015367	24	0.0448104	2.91602	chr15: 62277150	lincRNA: AC126323.6	2	['ICE2', 'RORA', 'VPS13C', 'C2CD4A', 'C2CD4B']	['TLN2', 'TPM1', 'LACTB', 'RPS27L', 'RAB8B']	['ICE2', 'RORA', 'VPS13C', 'C2CD4A', 'C2CD4B', 'TLN2', 'TPM1', 'LACTB', 'RPS27L', 'RAB8B']
220	222	AGGAGCCTTCCTTTTTTAGA	360	0.015367	24	0.0448104	2.91602	chr14: 93040911	Predicted promoter flanking region: Promoter Flanking Region	2	['RIN3', 'LGMN', 'GOLGA5', 'CHGA', 'ITPK1']	['MOAP1', 'TMEM251', 'AL110118.2', 'GON7', 'UBR7']	['RIN3', 'LGMN', 'GOLGA5', 'CHGA', 'ITPK1', 'MOAP1', 'TMEM251', 'AL110118.2', 'GON7', 'UBR7']
221	225	ATGATGATTACCCCGAGGAA	503	0.0214711	28	0.0522788	2.43484	chr7: 45551118		2	['MYO1G', 'CCM2', 'NACAD', 'TBRG4', 'RAMP3']	['ADCY1', 'AC096582.3', 'IGFBP1', 'IGFBP3', 'TNS3']	['MYO1G', 'CCM2', 'NACAD', 'TBRG4', 'RAMP3', 'ADCY1', 'AC096582.3', 'IGFBP1', 'IGFBP3', 'TNS3']

## Sheet: Target
	Found near different Hits	positions	number of different positions
RNF144A	5	['chr2: 9229295 ']	1
ID2	5	['chr2: 9229295 ']	1
KIDINS220	5	['chr2: 9229295 ']	1
MBOAT2	5	['chr2: 9229295 ']	1
ASAP2	5	['chr2: 9229295 ']	1
ITGB1BP1	5	['chr2: 9229295 ']	1
CPSF3	5	['chr2: 9229295 ']	1
IAH1	5	['chr2: 9229295 ']	1
ADAM17	5	['chr2: 9229295 ']	1
YWHAQ	5	['chr2: 9229295 ']	1
SPIN2A	4	['chrX: 56546543', 'chrX: 57766898 ', 'chrX: 63133046', 'chrX: 63245878']	4
MYEF2	4	['chr15: 46196807', 'chr15: 48650997 ', 'chr15: 48469213 ']	3
CTXN2	4	['chr15: 46196807', 'chr15: 48650997 ', 'chr15: 48469213 ']	3
OTUD6B	3	['chr8: 93022800']	1
LRRC69	3	['chr8: 93022800']	1
SLC26A7	3	['chr8: 93022800']	1
RUNX1T1	3	['chr8: 93022800']	1
TRIQK	3	['chr8: 93022800']	1
FAM92A	3	['chr8: 93022800']	1
RBM12B	3	['chr8: 93022800']	1
RBM12B-AS1	3	['chr8: 93022800']	1
TMEM67	3	['chr8: 93022800']	1
PDP1	3	['chr8: 93022800']	1
NUDT6	3	['chr4: 127602114', 'chr4: 126772179']	2
SPATA5	3	['chr4: 127602114', 'chr4: 126772179']	2
SPRY1	3	['chr4: 127602114', 'chr4: 126772179']	2
ANKRD50	3	['chr4: 127602114', 'chr4: 126772179']	2
FAT4	3	['chr4: 127602114', 'chr4: 126772179']	2
INTU	3	['chr4: 127602114', 'chr4: 126772179']	2
SLC25A31	3	['chr4: 127602114', 'chr4: 126772179']	2
HSPA4L	3	['chr4: 127602114', 'chr4: 126772179']	2
PLK4	3	['chr4: 127602114', 'chr4: 126772179']	2
MFSD8	3	['chr4: 127602114', 'chr4: 126772179']	2
PCBD2	3	['chr5: 134925738 ', 'chr5: 135386659 ']	2
AC006077.2	3	['chr5: 134925738 ', 'chr5: 135386659 ']	2
CATSPER3	3	['chr5: 134925738 ', 'chr5: 135386659 ']	2
PITX1	3	['chr5: 134925738 ', 'chr5: 135386659 ']	2
H2AFY	3	['chr5: 134925738 ', 'chr5: 135386659 ']	2
DCANP1	3	['chr5: 134925738 ', 'chr5: 135386659 ']	2
TIFAB	3	['chr5: 134925738 ', 'chr5: 135386659 ']	2
LRBA	3	['chr4: 151347946 ']	1
MAB21L2	3	['chr4: 151347946 ']	1
RPS3A	3	['chr4: 151347946 ']	1
SH3D19	3	['chr4: 151347946 ']	1
PRSS48	3	['chr4: 151347946 ']	1
FAM160A1	3	['chr4: 151347946 ']	1
AC092611.3	3	['chr4: 151347946 ']	1
GATB	3	['chr4: 151347946 ']	1
FBXW7	3	['chr4: 151347946 ']	1
MIR4453HG	3	['chr4: 151347946 ']	1
FAAH2	3	['chrX: 57766898 ', 'chrX: 63133046', 'chrX: 63245878']	3
ZXDB	3	['chrX: 57766898 ', 'chrX: 63133046', 'chrX: 63245878']	3
NLRP2B	3	['chrX: 57766898 ', 'chrX: 63133046', 'chrX: 63245878']	3
ZXDA	3	['chrX: 57766898 ', 'chrX: 63133046', 'chrX: 63245878']	3
SPIN4	3	['chrX: 57766898 ', 'chrX: 63133046', 'chrX: 63245878']	3
ARHGEF9	3	['chrX: 57766898 ', 'chrX: 63133046', 'chrX: 63245878']	3
AMER1	3	['chrX: 57766898 ', 'chrX: 63133046', 'chrX: 63245878']	3
ASB12	3	['chrX: 57766898 ', 'chrX: 63133046', 'chrX: 63245878']	3
SLC12A1	3	['chr15: 48650997 ', 'chr15: 48469213 ']	2
DUT	3	['chr15: 48650997 ', 'chr15: 48469213 ']	2
FBN1	3	['chr15: 48650997 ', 'chr15: 48469213 ']	2
CEP152	3	['chr15: 48650997 ', 'chr15: 48469213 ']	2
SHC4	3	['chr15: 48650997 ', 'chr15: 48469213 ']	2
EID1	3	['chr15: 48650997 ', 'chr15: 48469213 ']	2
SECISBP2L	3	['chr15: 48650997 ', 'chr15: 48469213 ']	2
COPS2	3	['chr15: 48650997 ', 'chr15: 48469213 ']	2
GBE1	3	['chr3: 75585884', 'chr3: 87719043']	2
GRAMD1C	3	['chr3: 114219595 ']	1
ZDHHC23	3	['chr3: 114219595 ']	1
CCDC191	3	['chr3: 114219595 ']	1
QTRT2	3	['chr3: 114219595 ']	1
DRD3	3	['chr3: 114219595 ']	1
ZNF80	3	['chr3: 114219595 ']	1
TIGIT	3	['chr3: 114219595 ']	1
ZBTB20	3	['chr3: 114219595 ']	1
AC093010.3	3	['chr3: 114219595 ']	1
GAP43	3	['chr3: 114219595 ']	1
GAD2	2	['chr10: 26873904', 'chr10: 26366309']	2
APBB1IP	2	['chr10: 26873904', 'chr10: 26366309']	2
AL390961.3	2	['chr10: 26873904', 'chr10: 26366309']	2
PDSS1	2	['chr10: 26873904', 'chr10: 26366309']	2
ABI1	2	['chr10: 26873904', 'chr10: 26366309']	2
ANKRD26	2	['chr10: 26873904', 'chr10: 26366309']	2
FAM174B	2	['chr15: 93351922 ', 'chr15: 94044085 ']	2
AC013394.1	2	['chr15: 93351922 ', 'chr15: 94044085 ']	2
CHD2	2	['chr15: 93351922 ', 'chr15: 94044085 ']	2
RGMA	2	['chr15: 93351922 ', 'chr15: 94044085 ']	2
AC112693.3	2	['chr15: 93351922 ', 'chr15: 94044085 ']	2
MCTP2	2	['chr15: 93351922 ', 'chr15: 94044085 ']	2
AC104260.2	2	['chr15: 93351922 ', 'chr15: 94044085 ']	2
AC012409.5	2	['chr15: 93351922 ', 'chr15: 94044085 ']	2
AC016251.1	2	['chr15: 93351922 ', 'chr15: 94044085 ']	2
AC016251.2	2	['chr15: 93351922 ', 'chr15: 94044085 ']	2
RAB6B	2	['chr3: 134378450 ']	1
C3orf36	2	['chr3: 134378450 ']	1
SLCO2A1	2	['chr3: 134378450 ']	1
RYK	2	['chr3: 134378450 ']	1
AMOTL2	2	['chr3: 134378450 ']	1
ANAPC13	2	['chr3: 134378450 ']	1
CEP63	2	['chr3: 134378450 ']	1
EPHB1	2	['chr3: 134378450 ']	1
KY	2	['chr3: 134378450 ']	1
PPP2R3A	2	['chr3: 134378450 ']	1
SPIN2B	2	['chrX: 56546543', 'chrX: 57766898 ']	2
CASK	2	['chrX: 42915060', 'chrX: 40943975']	2
GPR34	2	['chrX: 42915060', 'chrX: 40943975']	2
PPP1R2C	2	['chrX: 42915060', 'chrX: 44395117']	2
MAOA	2	['chrX: 42915060', 'chrX: 44395117']	2
MAOB	2	['chrX: 42915060', 'chrX: 44395117']	2
NDP	2	['chrX: 42915060', 'chrX: 44395117']	2
EFHC2	2	['chrX: 42915060', 'chrX: 44395117']	2
FUNDC1	2	['chrX: 42915060', 'chrX: 44395117']	2
MS4A14	2	['chr11: 60570893']	1
MS4A5	2	['chr11: 60570893']	1
MS4A1	2	['chr11: 60570893']	1
MS4A12	2	['chr11: 60570893']	1
MS4A13	2	['chr11: 60570893']	1
MS4A8	2	['chr11: 60570893']	1
MS4A18	2	['chr11: 60570893']	1
MS4A15	2	['chr11: 60570893']	1
MS4A10	2	['chr11: 60570893']	1
CCDC86	2	['chr11: 60570893']	1
RIN3	2	['chr14: 92589522 ', 'chr14: 93040911 ']	2
LGMN	2	['chr14: 92589522 ', 'chr14: 93040911 ']	2
GOLGA5	2	['chr14: 92589522 ', 'chr14: 93040911 ']	2
CHGA	2	['chr14: 92589522 ', 'chr14: 93040911 ']	2
ITPK1	2	['chr14: 92589522 ', 'chr14: 93040911 ']	2
MOAP1	2	['chr14: 92589522 ', 'chr14: 93040911 ']	2
API5	2	['chr11: 36880110', 'chr11: 43950323 ']	2
TTC17	2	['chr11: 36880110', 'chr11: 43950323 ']	2
CDH23	2	['chr10: 71998135 ']	1
C10orf105	2	['chr10: 71998135 ']	1
VSIR	2	['chr10: 71998135 ']	1
PSAP	2	['chr10: 71998135 ']	1
CHST3	2	['chr10: 71998135 ']	1
SPOCK2	2	['chr10: 71998135 ']	1
ASCC1	2	['chr10: 71998135 ']	1
ANAPC16	2	['chr10: 71998135 ']	1
DDIT4	2	['chr10: 71998135 ']	1
DNAJB12	2	['chr10: 71998135 ']	1
CASP8AP2	2	['chr6: 93684039', 'chr6: 93537835']	2
GJA10	2	['chr6: 93684039', 'chr6: 93537835']	2
BACH2	2	['chr6: 93684039', 'chr6: 93537835']	2
MAP3K7	2	['chr6: 93684039', 'chr6: 93537835']	2
EPHA7	2	['chr6: 93684039', 'chr6: 93537835']	2
AL356094.1	2	['chr6: 93684039', 'chr6: 93537835']	2
AL078595.3	2	['chr6: 93684039', 'chr6: 93537835']	2
MANEA	2	['chr6: 93684039', 'chr6: 93537835']	2
FUT9	2	['chr6: 93684039', 'chr6: 93537835']	2
UFL1	2	['chr6: 93684039', 'chr6: 93537835']	2
TNFAIP8L1	2	['chr19: 4833280']	1
MYDGF	2	['chr19: 4833280']	1
DPP9	2	['chr19: 4833280']	1
FEM1A	2	['chr19: 4833280']	1
TICAM1	2	['chr19: 4833280']	1
PLIN3	2	['chr19: 4833280']	1
ARRDC5	2	['chr19: 4833280']	1
UHRF1	2	['chr19: 4833280']	1
KDM4B	2	['chr19: 4833280']	1
PTPRS	2	['chr19: 4833280']	1
BIVM	2	['chr13: 106372978 ']	1
BIVM-ERCC5	2	['chr13: 106372978 ']	1
ERCC5	2	['chr13: 106372978 ']	1
SLC10A2	2	['chr13: 106372978 ']	1
DAOA	2	['chr13: 106372978 ']	1
EFNB2	2	['chr13: 106372978 ']	1
ARGLU1	2	['chr13: 106372978 ']	1
AL162574.3	2	['chr13: 106372978 ']	1
FAM155A	2	['chr13: 106372978 ']	1
LIG4	2	['chr13: 106372978 ']	1
NEFL	2	['chr8: 25769979', 'chr8: 24437438 ']	2
DOCK5	2	['chr8: 25769979', 'chr8: 24437438 ']	2
GNRH1	2	['chr8: 25769979', 'chr8: 24437438 ']	2
UTY	2	['chrY: 9626347 ', 'chrY: 14928127']	2
TMSB4Y	2	['chrY: 9626347 ', 'chrY: 14928127']	2
VCY	2	['chrY: 9626347 ', 'chrY: 14928127']	2
XIAP	2	['chrX: 121507576', 'chrX: 125186709']	2
STAG2	2	['chrX: 121507576', 'chrX: 125186709']	2
NEUROG1	2	['chr5: 135386659 ']	1
CXCL14	2	['chr5: 135386659 ']	1
SLC25A48	2	['chr5: 135386659 ']	1
SNAI1	2	['chr20: 49831124 ', 'chr20: 50212767']	2
UBE2V1	2	['chr20: 49831124 ', 'chr20: 50212767']	2
TMEM189-UBE2V1	2	['chr20: 49831124 ', 'chr20: 50212767']	2
HOXB8	2	['chr17: 48740801']	1
HOXB9	2	['chr17: 48740801']	1
PRAC1	2	['chr17: 48740801']	1
PRAC2	2	['chr17: 48740801']	1
HOXB13	2	['chr17: 48740801']	1
TTLL6	2	['chr17: 48740801']	1
CALCOCO2	2	['chr17: 48740801']	1
ATP5MC1	2	['chr17: 48740801']	1
UBE2Z	2	['chr17: 48740801']	1
SNF8	2	['chr17: 48740801']	1
MYO1G	2	['chr7: 45341971', 'chr7: 45551118']	2
CCM2	2	['chr7: 45341971', 'chr7: 45551118']	2
NACAD	2	['chr7: 45341971', 'chr7: 45551118']	2
TBRG4	2	['chr7: 45341971', 'chr7: 45551118']	2
RAMP3	2	['chr7: 45341971', 'chr7: 45551118']	2
ADCY1	2	['chr7: 45341971', 'chr7: 45551118']	2
AC096582.3	2	['chr7: 45341971', 'chr7: 45551118']	2
IGFBP1	2	['chr7: 45341971', 'chr7: 45551118']	2
IGFBP3	2	['chr7: 45341971', 'chr7: 45551118']	2
TNS3	2	['chr7: 45341971', 'chr7: 45551118']	2
SLC16A7	2	['chr12: 58338965', 'chr12: 63123236']	2
FAM19A2	2	['chr12: 58338965', 'chr12: 63123236']	2
USP15	2	['chr12: 58338965', 'chr12: 63123236']	2
MON2	2	['chr12: 58338965', 'chr12: 63123236']	2
PPP4R2	2	['chr3: 75585884', 'chr3: 73290817']	2
EBLN2	2	['chr3: 75585884', 'chr3: 73290817']	2
PDZRN3	2	['chr3: 75585884', 'chr3: 73290817']	2
AC117489.1	2	['chr3: 75585884', 'chr3: 73290817']	2
CNTN3	2	['chr3: 75585884', 'chr3: 73290817']	2
FRG2C	2	['chr3: 75585884', 'chr3: 73290817']	2
ZNF717	2	['chr3: 75585884', 'chr3: 73290817']	2
TMEM19	2	['chr12: 73821342 ', 'chr12: 72740808']	2
RAB21	2	['chr12: 73821342 ', 'chr12: 72740808']	2
TBC1D15	2	['chr12: 73821342 ', 'chr12: 72740808']	2
TPH2	2	['chr12: 73821342 ', 'chr12: 72740808']	2
TRHDE	2	['chr12: 73821342 ', 'chr12: 72740808']	2
ATXN7L3B	2	['chr12: 73821342 ', 'chr12: 72740808']	2
KCNC2	2	['chr12: 73821342 ', 'chr12: 72740808']	2
CAPS2	2	['chr12: 73821342 ', 'chr12: 72740808']	2
GLIPR1L1	2	['chr12: 73821342 ', 'chr12: 72740808']	2
GLIPR1L2	2	['chr12: 73821342 ', 'chr12: 72740808']	2
MTMR8	2	['chrX: 63133046', 'chrX: 63245878']	2
AS3MT	2	['chr10: 103282011 ']	1
CNNM2	2	['chr10: 103282011 ']	1
NT5C2	2	['chr10: 103282011 ']	1
RPEL1	2	['chr10: 103282011 ']	1
INA	2	['chr10: 103282011 ']	1
PCGF6	2	['chr10: 103282011 ']	1
TAF5	2	['chr10: 103282011 ']	1
ATP5MD	2	['chr10: 103282011 ']	1
PDCD11	2	['chr10: 103282011 ']	1
CALHM2	2	['chr10: 103282011 ']	1
PWAR5	2	['chr15: 25510318 ']	1
AC124312.6	2	['chr15: 25510318 ']	1
PWAR1	2	['chr15: 25510318 ']	1
AC124303.2	2	['chr15: 25510318 ']	1
UBE3A	2	['chr15: 25510318 ']	1
ATP10A	2	['chr15: 25510318 ']	1
GABRB3	2	['chr15: 25510318 ']	1
GABRA5	2	['chr15: 25510318 ']	1
GABRG3	2	['chr15: 25510318 ']	1
OCA2	2	['chr15: 25510318 ']	1
ICE2	2	['chr15: 61231050', 'chr15: 62277150 ']	2
RORA	2	['chr15: 61231050', 'chr15: 62277150 ']	2
VPS13C	2	['chr15: 61231050', 'chr15: 62277150 ']	2
C2CD4A	2	['chr15: 61231050', 'chr15: 62277150 ']	2
C2CD4B	2	['chr15: 61231050', 'chr15: 62277150 ']	2
TLN2	2	['chr15: 61231050', 'chr15: 62277150 ']	2
TPM1	2	['chr15: 61231050', 'chr15: 62277150 ']	2
RBM26	2	['chr13: 87671102 ']	1
NDFIP2	2	['chr13: 87671102 ']	1
SPRY2	2	['chr13: 87671102 ']	1
SLITRK1	2	['chr13: 87671102 ']	1
SLITRK6	2	['chr13: 87671102 ']	1
SLITRK5	2	['chr13: 87671102 ']	1
GPC5	2	['chr13: 87671102 ']	1
AL356118.1	2	['chr13: 87671102 ']	1
AL157815.1	2	['chr13: 87671102 ']	1
AL159152.1	2	['chr13: 87671102 ']	1
TMEM173	2	['chr5: 140091178 ']	1
UBE2D2	2	['chr5: 140091178 ']	1
CXXC5	2	['chr5: 140091178 ']	1
PSD2	2	['chr5: 140091178 ']	1
NRG2	2	['chr5: 140091178 ']	1
PURA	2	['chr5: 140091178 ']	1
IGIP	2	['chr5: 140091178 ']	1
CYSTM1	2	['chr5: 140091178 ']	1
PFDN1	2	['chr5: 140091178 ']	1
HBEGF	2	['chr5: 140091178 ']	1
MGMT	2	['chr10: 131406357', 'chr10: 129806134 ']	2
EBF3	2	['chr10: 131406357', 'chr10: 129806134 ']	2
C10orf143	2	['chr10: 131406357', 'chr10: 129806134 ']	2
GLRX3	2	['chr10: 131406357', 'chr10: 129806134 ']	2
TCERG1L	2	['chr10: 131406357', 'chr10: 129806134 ']	2
AL607033.1	2	['chr10: 131406357', 'chr10: 129806134 ']	2
LAS1L	2	['chrX: 66279221', 'chrX: 66937900']	2
MSN	2	['chrX: 66279221', 'chrX: 66937900']	2
VSIG4	2	['chrX: 66279221', 'chrX: 66937900']	2
HEPH	2	['chrX: 66279221', 'chrX: 66937900']	2
EDA2R	2	['chrX: 66279221', 'chrX: 66937900']	2
AR	2	['chrX: 66279221', 'chrX: 66937900']	2
OPHN1	2	['chrX: 66279221', 'chrX: 66937900']	2
YIPF6	2	['chrX: 66279221', 'chrX: 66937900']	2
STARD8	2	['chrX: 66279221', 'chrX: 66937900']	2
CADM2	2	['chr3: 87719043']	1
VGLL3	2	['chr3: 87719043']	1
CHMP2B	2	['chr3: 87719043']	1
POU1F1	2	['chr3: 87719043']	1
HTR1F	2	['chr3: 87719043']	1
CGGBP1	2	['chr3: 87719043']	1
ZNF654	2	['chr3: 87719043']	1
C3orf38	2	['chr3: 87719043']	1
CSNKA2IP	2	['chr3: 87719043']	1
GLUD1	2	['chr10: 87294109 ', 'chr10: 87443841']	2
SHLD2	2	['chr10: 87294109 ', 'chr10: 87443841']	2
NUTM2A	2	['chr10: 87294109 ', 'chr10: 87443841']	2
LINC00863	2	['chr10: 87294109 ', 'chr10: 87443841']	2
NUTM2D	2	['chr10: 87294109 ', 'chr10: 87443841']	2
MINPP1	2	['chr10: 87294109 ', 'chr10: 87443841']	2
PAPSS2	2	['chr10: 87294109 ', 'chr10: 87443841']	2
ATAD1	2	['chr10: 87294109 ', 'chr10: 87443841']	2
ECD	2	['chr10: 73358465 ']	1
FAM149B1	2	['chr10: 73358465 ']	1
DNAJC9	2	['chr10: 73358465 ']	1
MRPS16	2	['chr10: 73358465 ']	1
CFAP70	2	['chr10: 73358465 ']	1
ANXA7	2	['chr10: 73358465 ']	1
MSS51	2	['chr10: 73358465 ']	1
PPP3CB	2	['chr10: 73358465 ']	1
USP54	2	['chr10: 73358465 ']	1
MYOZ1	2	['chr10: 73358465 ']	1
YME1L1	1	['chr10: 26873904']	1
MASTL	1	['chr10: 26873904']	1
ACBD5	1	['chr10: 26873904']	1
PTCHD3	1	['chr10: 26873904']	1
AKR1B1	1	['chr7: 134974490']	1
AKR1B10	1	['chr7: 134974490']	1
AKR1B15	1	['chr7: 134974490']	1
BPGM	1	['chr7: 134974490']	1
CALD1	1	['chr7: 134974490']	1
AGBL3	1	['chr7: 134974490']	1
CYREN	1	['chr7: 134974490']	1
TMEM140	1	['chr7: 134974490']	1
WDR91	1	['chr7: 134974490']	1
STRA8	1	['chr7: 134974490']	1
NAT10	1	['chr11: 34717155']	1
ABTB2	1	['chr11: 34717155']	1
CAT	1	['chr11: 34717155']	1
ELF5	1	['chr11: 34717155']	1
EHF	1	['chr11: 34717155']	1
APIP	1	['chr11: 34717155']	1
PDHX	1	['chr11: 34717155']	1
CD44	1	['chr11: 34717155']	1
SLC1A2	1	['chr11: 34717155']	1
PAMR1	1	['chr11: 34717155']	1
EPB41	1	['chr1: 29331667 ']	1
TMEM200B	1	['chr1: 29331667 ']	1
SRSF4	1	['chr1: 29331667 ']	1
MECR	1	['chr1: 29331667 ']	1
PTPRU	1	['chr1: 29331667 ']	1
MATN1	1	['chr1: 29331667 ']	1
LAPTM5	1	['chr1: 29331667 ']	1
SDC3	1	['chr1: 29331667 ']	1
PUM1	1	['chr1: 29331667 ']	1
NKAIN1	1	['chr1: 29331667 ']	1
CEP95	1	['chr17: 65181562 ']	1
SMURF2	1	['chr17: 65181562 ']	1
LRRC37A3	1	['chr17: 65181562 ']	1
GNA13	1	['chr17: 65181562 ']	1
RGS9	1	['chr17: 65181562 ']	1
AXIN2	1	['chr17: 65181562 ']	1
AC004805.1	1	['chr17: 65181562 ']	1
CEP112	1	['chr17: 65181562 ']	1
APOH	1	['chr17: 65181562 ']	1
PRKCA	1	['chr17: 65181562 ']	1
AC006994.2	1	['chr2: 211103345']	1
ACADL	1	['chr2: 211103345']	1
MYL1	1	['chr2: 211103345']	1
LANCL1	1	['chr2: 211103345']	1
CPS1	1	['chr2: 211103345']	1
ERBB4	1	['chr2: 211103345']	1
IKZF2	1	['chr2: 211103345']	1
SPAG16	1	['chr2: 211103345']	1
VWC2L	1	['chr2: 211103345']	1
BARD1	1	['chr2: 211103345']	1
AMY2B	1	['chr1: 105967667 ']	1
AMY2A	1	['chr1: 105967667 ']	1
AMY1A	1	['chr1: 105967667 ']	1
AMY1B	1	['chr1: 105967667 ']	1
AMY1C	1	['chr1: 105967667 ']	1
PRMT6	1	['chr1: 105967667 ']	1
NTNG1	1	['chr1: 105967667 ']	1
VAV3	1	['chr1: 105967667 ']	1
SLC25A24	1	['chr1: 105967667 ']	1
AL359258.3	1	['chr1: 105967667 ']	1
SERPINE2	1	['chr2: 225376800']	1
FAM124B	1	['chr2: 225376800']	1
CUL3	1	['chr2: 225376800']	1
CCDC195	1	['chr2: 225376800']	1
DOCK10	1	['chr2: 225376800']	1
NYAP2	1	['chr2: 225376800']	1
AC016717.3	1	['chr2: 225376800']	1
IRS1	1	['chr2: 225376800']	1
RHBDD1	1	['chr2: 225376800']	1
COL4A4	1	['chr2: 225376800']	1
HOMER1	1	['chr5: 80110814']	1
TENT2	1	['chr5: 80110814']	1
CMYA5	1	['chr5: 80110814']	1
MTX3	1	['chr5: 80110814']	1
THBS4	1	['chr5: 80110814']	1
SERINC5	1	['chr5: 80110814']	1
SPZ1	1	['chr5: 80110814']	1
ZFYVE16	1	['chr5: 80110814']	1
FAM151B	1	['chr5: 80110814']	1
ANKRD34B	1	['chr5: 80110814']	1
PDZD8	1	['chr10: 118618077']	1
EMX2	1	['chr10: 118618077']	1
RAB11FIP2	1	['chr10: 118618077']	1
FAM204A	1	['chr10: 118618077']	1
PRLHR	1	['chr10: 118618077']	1
CACUL1	1	['chr10: 118618077']	1
NANOS1	1	['chr10: 118618077']	1
EIF3A	1	['chr10: 118618077']	1
FAM45A	1	['chr10: 118618077']	1
SFXN4	1	['chr10: 118618077']	1
TG	1	['chr8: 133596004']	1
SLA	1	['chr8: 133596004']	1
WISP1	1	['chr8: 133596004']	1
NDRG1	1	['chr8: 133596004']	1
ST3GAL1	1	['chr8: 133596004']	1
ZFAT	1	['chr8: 133596004']	1
AC087045.3	1	['chr8: 133596004']	1
AC083843.4	1	['chr8: 133596004']	1
KHDRBS3	1	['chr8: 133596004']	1
FAM135B	1	['chr8: 133596004']	1
ZHX1	1	['chr8: 123661773 ']	1
ATAD2	1	['chr8: 123661773 ']	1
WDYHV1	1	['chr8: 123661773 ']	1
FBXO32	1	['chr8: 123661773 ']	1
KLHL38	1	['chr8: 123661773 ']	1
ANXA13	1	['chr8: 123661773 ']	1
FAM91A1	1	['chr8: 123661773 ']	1
FER1L6	1	['chr8: 123661773 ']	1
TMEM65	1	['chr8: 123661773 ']	1
TRMT12	1	['chr8: 123661773 ']	1
MAGEH1	1	['chrX: 56546543']	1
USP51	1	['chrX: 56546543']	1
FOXR2	1	['chrX: 56546543']	1
RRAGB	1	['chrX: 56546543']	1
KLF8	1	['chrX: 56546543']	1
UBQLN2	1	['chrX: 56546543']	1
NBDY	1	['chrX: 56546543']	1
SPIN3	1	['chrX: 56546543']	1
RAET1G	1	['chr6: 150103083']	1
ULBP2	1	['chr6: 150103083']	1
ULBP1	1	['chr6: 150103083']	1
RAET1L	1	['chr6: 150103083']	1
ULBP3	1	['chr6: 150103083']	1
PPP1R14C	1	['chr6: 150103083']	1
IYD	1	['chr6: 150103083']	1
PLEKHG1	1	['chr6: 150103083']	1
MTHFD1L	1	['chr6: 150103083']	1
AKAP12	1	['chr6: 150103083']	1
TMEM26	1	['chr10: 62451286 ']	1
CABCOCO1	1	['chr10: 62451286 ']	1
ARID5B	1	['chr10: 62451286 ']	1
RTKN2	1	['chr10: 62451286 ']	1
ZNF365	1	['chr10: 62451286 ']	1
ADO	1	['chr10: 62451286 ']	1
EGR2	1	['chr10: 62451286 ']	1
NRBF2	1	['chr10: 62451286 ']	1
JMJD1C	1	['chr10: 62451286 ']	1
REEP3	1	['chr10: 62451286 ']	1
ITGA6	1	['chr2: 173827443']	1
PDK1	1	['chr2: 173827443']	1
RAPGEF4	1	['chr2: 173827443']	1
MAP3K20	1	['chr2: 173827443']	1
CDCA7	1	['chr2: 173827443']	1
SP3	1	['chr2: 173827443']	1
OLA1	1	['chr2: 173827443']	1
AC018470.1	1	['chr2: 173827443']	1
SP9	1	['chr2: 173827443']	1
CIR1	1	['chr2: 173827443']	1
C15orf48	1	['chr15: 46196807']	1
SLC30A4	1	['chr15: 46196807']	1
BLOC1S6	1	['chr15: 46196807']	1
AC090527.2	1	['chr15: 46196807']	1
SQOR	1	['chr15: 46196807']	1
AC066615.1	1	['chr15: 46196807']	1
SEMA6D	1	['chr15: 46196807']	1
SLC24A5	1	['chr15: 46196807']	1
INTS10	1	['chr8: 20435223 ']	1
LPL	1	['chr8: 20435223 ']	1
SLC18A1	1	['chr8: 20435223 ']	1
ATP6V1B2	1	['chr8: 20435223 ']	1
LZTS1	1	['chr8: 20435223 ']	1
AC021613.1	1	['chr8: 20435223 ']	1
GFRA2	1	['chr8: 20435223 ']	1
DOK2	1	['chr8: 20435223 ']	1
XPO7	1	['chr8: 20435223 ']	1
NPM2	1	['chr8: 20435223 ']	1
TRAV5	1	['chr14: 21813515']	1
TRAV6	1	['chr14: 21813515']	1
TRAV7	1	['chr14: 21813515']	1
TRAV8-1	1	['chr14: 21813515']	1
TRAV9-1	1	['chr14: 21813515']	1
TRAV10	1	['chr14: 21813515']	1
TRAV12-1	1	['chr14: 21813515']	1
TRAV8-2	1	['chr14: 21813515']	1
TRAV8-3	1	['chr14: 21813515']	1
TRAV13-1	1	['chr14: 21813515']	1
GPR82	1	['chrX: 42915060']	1
AL023875.1	1	['chrX: 42915060']	1
CTAGE8	1	['chr7: 145048388']	1
OR2A1	1	['chr7: 145048388']	1
ARHGEF5	1	['chr7: 145048388']	1
NOBOX	1	['chr7: 145048388']	1
TPK1	1	['chr7: 145048388']	1
AC073308.1	1	['chr7: 145048388']	1
CNTNAP2	1	['chr7: 145048388']	1
C7orf33	1	['chr7: 145048388']	1
CUL1	1	['chr7: 145048388']	1
EZH2	1	['chr7: 145048388']	1
IDI1	1	['chr10: 3197670 ']	1
WDR37	1	['chr10: 3197670 ']	1
ADARB2	1	['chr10: 3197670 ']	1
PFKP	1	['chr10: 3197670 ']	1
PITRM1	1	['chr10: 3197670 ']	1
KLF6	1	['chr10: 3197670 ']	1
AKR1E2	1	['chr10: 3197670 ']	1
AKR1C1	1	['chr10: 3197670 ']	1
AKR1C2	1	['chr10: 3197670 ']	1
AKR1C3	1	['chr10: 3197670 ']	1
EFHB	1	['chr3: 20849148 ']	1
RAB5A	1	['chr3: 20849148 ']	1
PP2D1	1	['chr3: 20849148 ']	1
KAT2B	1	['chr3: 20849148 ']	1
SGO1	1	['chr3: 20849148 ']	1
ZNF385D	1	['chr3: 20849148 ']	1
UBE2E2	1	['chr3: 20849148 ']	1
UBE2E1	1	['chr3: 20849148 ']	1
NKIRAS1	1	['chr3: 20849148 ']	1
RPL15	1	['chr3: 20849148 ']	1
FBXO8	1	['chr4: 175563886']	1
CEP44	1	['chr4: 175563886']	1
HPGD	1	['chr4: 175563886']	1
GLRA3	1	['chr4: 175563886']	1
ADAM29	1	['chr4: 175563886']	1
GPM6A	1	['chr4: 175563886']	1
WDR17	1	['chr4: 175563886']	1
SPATA4	1	['chr4: 175563886']	1
ASB5	1	['chr4: 175563886']	1
SPCS3	1	['chr4: 175563886']	1
ATXN3	1	['chr14: 92589522 ']	1
NDUFB1	1	['chr14: 92589522 ']	1
CPSF2	1	['chr14: 92589522 ']	1
SLC24A4	1	['chr14: 92589522 ']	1
RBPJ	1	['chr4: 31886149']	1
CCKAR	1	['chr4: 31886149']	1
TBC1D19	1	['chr4: 31886149']	1
STIM2	1	['chr4: 31886149']	1
PCDH7	1	['chr4: 31886149']	1
ARAP2	1	['chr4: 31886149']	1
DTHD1	1	['chr4: 31886149']	1
NWD2	1	['chr4: 31886149']	1
C4orf19	1	['chr4: 31886149']	1
RELL1	1	['chr4: 31886149']	1
TRAF6	1	['chr11: 36880110']	1
AC061999.1	1	['chr11: 36880110']	1
RAG1	1	['chr11: 36880110']	1
RAG2	1	['chr11: 36880110']	1
C11orf74	1	['chr11: 36880110']	1
AC103798.2	1	['chr11: 36880110']	1
AC080100.1	1	['chr11: 36880110']	1
LRRC4C	1	['chr11: 36880110']	1
GM2A	1	['chr5: 151595853']	1
SLC36A3	1	['chr5: 151595853']	1
SLC36A2	1	['chr5: 151595853']	1
SLC36A1	1	['chr5: 151595853']	1
FAT2	1	['chr5: 151595853']	1
SPARC	1	['chr5: 151595853']	1
ATOX1	1	['chr5: 151595853']	1
G3BP1	1	['chr5: 151595853']	1
GLRA1	1	['chr5: 151595853']	1
NMUR2	1	['chr5: 151595853']	1
CD55	1	['chr1: 207841996 ']	1
CR2	1	['chr1: 207841996 ']	1
CR1	1	['chr1: 207841996 ']	1
CR1L	1	['chr1: 207841996 ']	1
CD46	1	['chr1: 207841996 ']	1
CD34	1	['chr1: 207841996 ']	1
PLXNA2	1	['chr1: 207841996 ']	1
CAMK1G	1	['chr1: 207841996 ']	1
LAMB3	1	['chr1: 207841996 ']	1
G0S2	1	['chr1: 207841996 ']	1
SLC35G1	1	['chr10: 94670929']	1
PLCE1	1	['chr10: 94670929']	1
NOC3L	1	['chr10: 94670929']	1
TBC1D12	1	['chr10: 94670929']	1
HELLS	1	['chr10: 94670929']	1
CYP2C18	1	['chr10: 94670929']	1
AL583836.1	1	['chr10: 94670929']	1
CYP2C19	1	['chr10: 94670929']	1
CYP2C9	1	['chr10: 94670929']	1
CYP2C8	1	['chr10: 94670929']	1
TMCO5A	1	['chr15: 39284781 ']	1
SPRED1	1	['chr15: 39284781 ']	1
FAM98B	1	['chr15: 39284781 ']	1
RASGRP1	1	['chr15: 39284781 ']	1
C15orf53	1	['chr15: 39284781 ']	1
THBS1	1	['chr15: 39284781 ']	1
FSIP1	1	['chr15: 39284781 ']	1
GPR176	1	['chr15: 39284781 ']	1
EIF2AK4	1	['chr15: 39284781 ']	1
SRP14	1	['chr15: 39284781 ']	1
BMP8B	1	['chr1: 40036652']	1
OXCT2	1	['chr1: 40036652']	1
TRIT1	1	['chr1: 40036652']	1
MYCL	1	['chr1: 40036652']	1
MFSD2A	1	['chr1: 40036652']	1
CAP1	1	['chr1: 40036652']	1
PPT1	1	['chr1: 40036652']	1
RLF	1	['chr1: 40036652']	1
TMCO2	1	['chr1: 40036652']	1
ZMPSTE24	1	['chr1: 40036652']	1
DDX46	1	['chr5: 134925738 ']	1
C5orf24	1	['chr5: 134925738 ']	1
TXNDC15	1	['chr5: 134925738 ']	1
AC027644.4	1	['chr7: 68736601 ']	1
RABGEF1	1	['chr7: 68736601 ']	1
TMEM248	1	['chr7: 68736601 ']	1
SBDS	1	['chr7: 68736601 ']	1
TYW1	1	['chr7: 68736601 ']	1
AUTS2	1	['chr7: 68736601 ']	1
GALNT17	1	['chr7: 68736601 ']	1
CALN1	1	['chr7: 68736601 ']	1
TYW1B	1	['chr7: 68736601 ']	1
POM121	1	['chr7: 68736601 ']	1
FAM213B	1	['chr1: 3136108 ']	1
MMEL1	1	['chr1: 3136108 ']	1
TTC34	1	['chr1: 3136108 ']	1
ACTRT2	1	['chr1: 3136108 ']	1
PRDM16	1	['chr1: 3136108 ']	1
AL512383.1	1	['chr1: 3136108 ']	1
ARHGEF16	1	['chr1: 3136108 ']	1
MEGF6	1	['chr1: 3136108 ']	1
TPRG1L	1	['chr1: 3136108 ']	1
WRAP73	1	['chr1: 3136108 ']	1
DNAJB9	1	['chr7: 112204523 ']	1
AC004014.2	1	['chr7: 112204523 ']	1
IMMP2L	1	['chr7: 112204523 ']	1
LRRN3	1	['chr7: 112204523 ']	1
DOCK4	1	['chr7: 112204523 ']	1
ZNF277	1	['chr7: 112204523 ']	1
IFRD1	1	['chr7: 112204523 ']	1
LSMEM1	1	['chr7: 112204523 ']	1
TMEM168	1	['chr7: 112204523 ']	1
BMT2	1	['chr7: 112204523 ']	1
RAB32	1	['chr6: 148677634 ']	1
ADGB	1	['chr6: 148677634 ']	1
STXBP5	1	['chr6: 148677634 ']	1
SAMD5	1	['chr6: 148677634 ']	1
SASH1	1	['chr6: 148677634 ']	1
UST	1	['chr6: 148677634 ']	1
TAB2	1	['chr6: 148677634 ']	1
SUMO4	1	['chr6: 148677634 ']	1
ZC3H12D	1	['chr6: 148677634 ']	1
PPIL4	1	['chr6: 148677634 ']	1
KCTD9	1	['chr8: 25769979']	1
CDCA2	1	['chr8: 25769979']	1
EBF2	1	['chr8: 25769979']	1
PPP2R2A	1	['chr8: 25769979']	1
BNIP3L	1	['chr8: 25769979']	1
PNMA2	1	['chr8: 25769979']	1
DPYSL2	1	['chr8: 25769979']	1
TMEM123	1	['chr11: 102760189 ']	1
MMP7	1	['chr11: 102760189 ']	1
MMP20	1	['chr11: 102760189 ']	1
MMP27	1	['chr11: 102760189 ']	1
MMP8	1	['chr11: 102760189 ']	1
MMP10	1	['chr11: 102760189 ']	1
MMP1	1	['chr11: 102760189 ']	1
MMP3	1	['chr11: 102760189 ']	1
MMP12	1	['chr11: 102760189 ']	1
MMP13	1	['chr11: 102760189 ']	1
AL049557.1	1	['chr1: 112197253 ']	1
INKA2-AS1	1	['chr1: 112197253 ']	1
AL049557.2	1	['chr1: 112197253 ']	1
DDX20	1	['chr1: 112197253 ']	1
KCND3	1	['chr1: 112197253 ']	1
CTTNBP2NL	1	['chr1: 112197253 ']	1
WNT2B	1	['chr1: 112197253 ']	1
ST7L	1	['chr1: 112197253 ']	1
CAPZA1	1	['chr1: 112197253 ']	1
MOV10	1	['chr1: 112197253 ']	1
SH3GLB1	1	['chr1: 87426197']	1
SELENOF	1	['chr1: 87426197']	1
HS2ST1	1	['chr1: 87426197']	1
AC093155.3	1	['chr1: 87426197']	1
LMO4	1	['chr1: 87426197']	1
AL445437.1	1	['chr1: 87426197']	1
PKN2	1	['chr1: 87426197']	1
GTF2B	1	['chr1: 87426197']	1
KYAT3	1	['chr1: 87426197']	1
RBMXL1	1	['chr1: 87426197']	1
LYPLA1	1	['chr8: 55649699']	1
MRPL15	1	['chr8: 55649699']	1
SOX17	1	['chr8: 55649699']	1
RP1	1	['chr8: 55649699']	1
XKR4	1	['chr8: 55649699']	1
TMEM68	1	['chr8: 55649699']	1
TGS1	1	['chr8: 55649699']	1
LYN	1	['chr8: 55649699']	1
RPS20	1	['chr8: 55649699']	1
MOS	1	['chr8: 55649699']	1
TSPY4	1	['chrY: 9626347 ']	1
TSPY8	1	['chrY: 9626347 ']	1
TSPY3	1	['chrY: 9626347 ']	1
TSPY1	1	['chrY: 9626347 ']	1
TSPY10	1	['chrY: 9626347 ']	1
USP9Y	1	['chrY: 9626347 ']	1
DDX3Y	1	['chrY: 9626347 ']	1
ZNF619	1	['chr3: 41965447']	1
ZNF620	1	['chr3: 41965447']	1
ZNF621	1	['chr3: 41965447']	1
CTNNB1	1	['chr3: 41965447']	1
ULK4	1	['chr3: 41965447']	1
TRAK1	1	['chr3: 41965447']	1
CCK	1	['chr3: 41965447']	1
LYZL4	1	['chr3: 41965447']	1
VIPR1	1	['chr3: 41965447']	1
SEC22C	1	['chr3: 41965447']	1
VCY1B	1	['chrY: 14928127']	1
NLGN4Y	1	['chrY: 14928127']	1
CDY2B	1	['chrY: 14928127']	1
CDY2A	1	['chrY: 14928127']	1
HSFY1	1	['chrY: 14928127']	1
HSFY2	1	['chrY: 14928127']	1
KDM5D	1	['chrY: 14928127']	1
WDPCP	1	['chr2: 64089673']	1
AC016734.2	1	['chr2: 64089673']	1
MDH1	1	['chr2: 64089673']	1
UGP2	1	['chr2: 64089673']	1
VPS54	1	['chr2: 64089673']	1
PELI1	1	['chr2: 64089673']	1
LGALSL	1	['chr2: 64089673']	1
AFTPH	1	['chr2: 64089673']	1
SERTAD2	1	['chr2: 64089673']	1
SLC1A4	1	['chr2: 64089673']	1
FIGNL1	1	['chr7: 53810547 ']	1
DDC	1	['chr7: 53810547 ']	1
GRB10	1	['chr7: 53810547 ']	1
COBL	1	['chr7: 53810547 ']	1
POM121L12	1	['chr7: 53810547 ']	1
VSTM2A	1	['chr7: 53810547 ']	1
SEC61G	1	['chr7: 53810547 ']	1
EGFR	1	['chr7: 53810547 ']	1
LANCL2	1	['chr7: 53810547 ']	1
VOPP1	1	['chr7: 53810547 ']	1
E2F6	1	['chr2: 14517142 ']	1
GREB1	1	['chr2: 14517142 ']	1
NTSR2	1	['chr2: 14517142 ']	1
LPIN1	1	['chr2: 14517142 ']	1
TRIB2	1	['chr2: 14517142 ']	1
FAM84A	1	['chr2: 14517142 ']	1
NBAS	1	['chr2: 14517142 ']	1
DDX1	1	['chr2: 14517142 ']	1
MYCN	1	['chr2: 14517142 ']	1
AC104623.2	1	['chr2: 14517142 ']	1
CT47A4	1	['chrX: 121507576']	1
CT47A3	1	['chrX: 121507576']	1
CT47A2	1	['chrX: 121507576']	1
CT47A1	1	['chrX: 121507576']	1
GLUD2	1	['chrX: 121507576']	1
AL357562.1	1	['chrX: 121507576']	1
GRIA3	1	['chrX: 121507576']	1
THOC2	1	['chrX: 121507576']	1
CRB1	1	['chr1: 198498227']	1
DENND1B	1	['chr1: 198498227']	1
C1orf53	1	['chr1: 198498227']	1
LHX9	1	['chr1: 198498227']	1
NEK7	1	['chr1: 198498227']	1
ATP6V1G3	1	['chr1: 198498227']	1
PTPRC	1	['chr1: 198498227']	1
NR5A2	1	['chr1: 198498227']	1
ZNF281	1	['chr1: 198498227']	1
KIF14	1	['chr1: 198498227']	1
AL161901.1	1	['chr13: 70129939 ']	1
PCDH20	1	['chr13: 70129939 ']	1
AL592490.1	1	['chr13: 70129939 ']	1
PCDH9	1	['chr13: 70129939 ']	1
KLHL1	1	['chr13: 70129939 ']	1
DACH1	1	['chr13: 70129939 ']	1
MZT1	1	['chr13: 70129939 ']	1
BORA	1	['chr13: 70129939 ']	1
DIS3	1	['chr13: 70129939 ']	1
PIBF1	1	['chr13: 70129939 ']	1
WARS	1	['chr14: 101263038 ']	1
WDR25	1	['chr14: 101263038 ']	1
BEGAIN	1	['chr14: 101263038 ']	1
DLK1	1	['chr14: 101263038 ']	1
RTL1	1	['chr14: 101263038 ']	1
DIO3	1	['chr14: 101263038 ']	1
PPP2R5C	1	['chr14: 101263038 ']	1
DYNC1H1	1	['chr14: 101263038 ']	1
HSP90AA1	1	['chr14: 101263038 ']	1
WDR20	1	['chr14: 101263038 ']	1
MFSD6L	1	['chr17: 9365346 ']	1
PIK3R6	1	['chr17: 9365346 ']	1
PIK3R5	1	['chr17: 9365346 ']	1
NTN1	1	['chr17: 9365346 ']	1
STX8	1	['chr17: 9365346 ']	1
CFAP52	1	['chr17: 9365346 ']	1
USP43	1	['chr17: 9365346 ']	1
DHRS7C	1	['chr17: 9365346 ']	1
GSG1L2	1	['chr17: 9365346 ']	1
GLP2R	1	['chr17: 9365346 ']	1
FARS2	1	['chr6: 7037517']	1
NRN1	1	['chr6: 7037517']	1
F13A1	1	['chr6: 7037517']	1
LY86	1	['chr6: 7037517']	1
AL031123.3	1	['chr6: 7037517']	1
RREB1	1	['chr6: 7037517']	1
SSR1	1	['chr6: 7037517']	1
CAGE1	1	['chr6: 7037517']	1
RIOK1	1	['chr6: 7037517']	1
DSP	1	['chr6: 7037517']	1
NMUR1	1	['chr2: 231916829']	1
TEX44	1	['chr2: 231916829']	1
PTMA	1	['chr2: 231916829']	1
PDE6D	1	['chr2: 231916829']	1
COPS7B	1	['chr2: 231916829']	1
NPPC	1	['chr2: 231916829']	1
DIS3L2	1	['chr2: 231916829']	1
ALPP	1	['chr2: 231916829']	1
ALPG	1	['chr2: 231916829']	1
ALPI	1	['chr2: 231916829']	1
LRP12	1	['chr8: 107508647']	1
ZFPM2	1	['chr8: 107508647']	1
OXR1	1	['chr8: 107508647']	1
ABRA	1	['chr8: 107508647']	1
ANGPT1	1	['chr8: 107508647']	1
RSPO2	1	['chr8: 107508647']	1
EIF3E	1	['chr8: 107508647']	1
EMC2	1	['chr8: 107508647']	1
TMEM74	1	['chr8: 107508647']	1
TRHR	1	['chr8: 107508647']	1
DTL	1	['chr1: 212621320']	1
PPP2R5A	1	['chr1: 212621320']	1
TMEM206	1	['chr1: 212621320']	1
NENF	1	['chr1: 212621320']	1
ATF3	1	['chr1: 212621320']	1
FAM71A	1	['chr1: 212621320']	1
BATF3	1	['chr1: 212621320']	1
NSL1	1	['chr1: 212621320']	1
TATDN3	1	['chr1: 212621320']	1
SPATA45	1	['chr1: 212621320']	1
ZNFX1	1	['chr20: 49831124 ']	1
KCNB1	1	['chr20: 49831124 ']	1
PTGIS	1	['chr20: 49831124 ']	1
B4GALT5	1	['chr20: 49831124 ']	1
SLC9A8	1	['chr20: 49831124 ']	1
SPATA2	1	['chr20: 49831124 ']	1
RNF114	1	['chr20: 49831124 ']	1
DUSP21	1	['chrX: 44395117']	1
KDM6A	1	['chrX: 44395117']	1
CXorf36	1	['chrX: 44395117']	1
KRBOX4	1	['chrX: 44395117']	1
PRDM6	1	['chr5: 124953192 ']	1
CEP120	1	['chr5: 124953192 ']	1
AC026422.1	1	['chr5: 124953192 ']	1
CSNK1G3	1	['chr5: 124953192 ']	1
ZNF608	1	['chr5: 124953192 ']	1
GRAMD2B	1	['chr5: 124953192 ']	1
AC093535.2	1	['chr5: 124953192 ']	1
ALDH7A1	1	['chr5: 124953192 ']	1
PHAX	1	['chr5: 124953192 ']	1
TEX43	1	['chr5: 124953192 ']	1
WDR64	1	['chr1: 242753866']	1
EXO1	1	['chr1: 242753866']	1
BECN2	1	['chr1: 242753866']	1
MAP1LC3C	1	['chr1: 242753866']	1
PLD5	1	['chr1: 242753866']	1
CEP170	1	['chr1: 242753866']	1
SDCCAG8	1	['chr1: 242753866']	1
AKT3	1	['chr1: 242753866']	1
ZBTB18	1	['chr1: 242753866']	1
AL590483.3	1	['chr1: 242753866']	1
DRAM1	1	['chr12: 102300105 ']	1
WASHC3	1	['chr12: 102300105 ']	1
NUP37	1	['chr12: 102300105 ']	1
PARPBP	1	['chr12: 102300105 ']	1
PMCH	1	['chr12: 102300105 ']	1
IGF1	1	['chr12: 102300105 ']	1
PAH	1	['chr12: 102300105 ']	1
ASCL1	1	['chr12: 102300105 ']	1
C12orf42	1	['chr12: 102300105 ']	1
STAB2	1	['chr12: 102300105 ']	1
CACNA2D2	1	['chr3: 50633650 ']	1
C3orf18	1	['chr3: 50633650 ']	1
HEMK1	1	['chr3: 50633650 ']	1
CISH	1	['chr3: 50633650 ']	1
MAPKAPK3	1	['chr3: 50633650 ']	1
DOCK3	1	['chr3: 50633650 ']	1
MANF	1	['chr3: 50633650 ']	1
RBM15B	1	['chr3: 50633650 ']	1
DCAF1	1	['chr3: 50633650 ']	1
RAD54L2	1	['chr3: 50633650 ']	1
PDE1B	1	['chr12: 54906319']	1
PPP1R1A	1	['chr12: 54906319']	1
LACRT	1	['chr12: 54906319']	1
DCD	1	['chr12: 54906319']	1
MUCL1	1	['chr12: 54906319']	1
TESPA1	1	['chr12: 54906319']	1
NEUROD4	1	['chr12: 54906319']	1
OR9K2	1	['chr12: 54906319']	1
OR10A7	1	['chr12: 54906319']	1
OR6C74	1	['chr12: 54906319']	1
AC005839.1	1	['chr17: 54286803']	1
UTP18	1	['chr17: 54286803']	1
CA10	1	['chr17: 54286803']	1
AC002090.1	1	['chr17: 54286803']	1
KIF2B	1	['chr17: 54286803']	1
TOM1L1	1	['chr17: 54286803']	1
COX11	1	['chr17: 54286803']	1
AC007485.2	1	['chr17: 54286803']	1
STXBP4	1	['chr17: 54286803']	1
HLF	1	['chr17: 54286803']	1
CLDND1	1	['chr3: 99082001']	1
CPOX	1	['chr3: 99082001']	1
GPR15	1	['chr3: 99082001']	1
ST3GAL6	1	['chr3: 99082001']	1
DCBLD2	1	['chr3: 99082001']	1
COL8A1	1	['chr3: 99082001']	1
CMSS1	1	['chr3: 99082001']	1
FILIP1L	1	['chr3: 99082001']	1
TBC1D23	1	['chr3: 99082001']	1
NIT2	1	['chr3: 99082001']	1
IPMK	1	['chr10: 58842471']	1
CISD1	1	['chr10: 58842471']	1
UBE2D1	1	['chr10: 58842471']	1
TFAM	1	['chr10: 58842471']	1
BICC1	1	['chr10: 58842471']	1
PHYHIPL	1	['chr10: 58842471']	1
FAM13C	1	['chr10: 58842471']	1
SLC16A9	1	['chr10: 58842471']	1
MRLN	1	['chr10: 58842471']	1
CCDC6	1	['chr10: 58842471']	1
TMEM82	1	['chr1: 15991245 ']	1
FBLIM1	1	['chr1: 15991245 ']	1
UQCRHL	1	['chr1: 15991245 ']	1
SPEN	1	['chr1: 15991245 ']	1
ZBTB17	1	['chr1: 15991245 ']	1
SRARP	1	['chr1: 15991245 ']	1
HSPB7	1	['chr1: 15991245 ']	1
CLCNKA	1	['chr1: 15991245 ']	1
CLCNKB	1	['chr1: 15991245 ']	1
FAM131C	1	['chr1: 15991245 ']	1
AVIL	1	['chr12: 58338965']	1
CTDSP2	1	['chr12: 58338965']	1
ATP23	1	['chr12: 58338965']	1
AC090643.1	1	['chr12: 58338965']	1
AC090643.2	1	['chr12: 58338965']	1
LRIG3	1	['chr12: 58338965']	1
RGL2	1	['chr6: 33377465 ']	1
TAPBP	1	['chr6: 33377465 ']	1
ZBTB22	1	['chr6: 33377465 ']	1
DAXX	1	['chr6: 33377465 ']	1
AL662820.1	1	['chr6: 33377465 ']	1
KIFC1	1	['chr6: 33377465 ']	1
PHF1	1	['chr6: 33377465 ']	1
CUTA	1	['chr6: 33377465 ']	1
SYNGAP1	1	['chr6: 33377465 ']	1
ZBTB9	1	['chr6: 33377465 ']	1
KRTAP5-7	1	['chr11: 71633812']	1
KRTAP5-8	1	['chr11: 71633812']	1
KRTAP5-9	1	['chr11: 71633812']	1
KRTAP5-10	1	['chr11: 71633812']	1
KRTAP5-11	1	['chr11: 71633812']	1
FAM86C1	1	['chr11: 71633812']	1
ZNF705E	1	['chr11: 71633812']	1
DEFB108B	1	['chr11: 71633812']	1
AP002495.2	1	['chr11: 71633812']	1
DEFB131B	1	['chr11: 71633812']	1
ROBO2	1	['chr3: 75585884']	1
ROBO1	1	['chr3: 75585884']	1
AC006511.3	1	['chr12: 8402372']	1
CLEC4A	1	['chr12: 8402372']	1
AC092111.3	1	['chr12: 8402372']	1
ZNF705A	1	['chr12: 8402372']	1
FAM90A1	1	['chr12: 8402372']	1
CLEC6A	1	['chr12: 8402372']	1
CLEC4D	1	['chr12: 8402372']	1
CLEC4E	1	['chr12: 8402372']	1
AICDA	1	['chr12: 8402372']	1
AC092184.1	1	['chr12: 8402372']	1
SYK	1	['chr9: 92116400']	1
AUH	1	['chr9: 92116400']	1
NFIL3	1	['chr9: 92116400']	1
ROR2	1	['chr9: 92116400']	1
SPTLC1	1	['chr9: 92116400']	1
IARS	1	['chr9: 92116400']	1
NOL8	1	['chr9: 92116400']	1
CENPP	1	['chr9: 92116400']	1
OGN	1	['chr9: 92116400']	1
OMD	1	['chr9: 92116400']	1
NDUFS6	1	['chr5: 3009017']	1
AC025183.4	1	['chr5: 3009017']	1
IRX4	1	['chr5: 3009017']	1
IRX2	1	['chr5: 3009017']	1
C5orf38	1	['chr5: 3009017']	1
IRX1	1	['chr5: 3009017']	1
ADAMTS16	1	['chr5: 3009017']	1
ICE1	1	['chr5: 3009017']	1
AC026797.1	1	['chr5: 3009017']	1
MED10	1	['chr5: 3009017']	1
STAT5B	1	['chr17: 42423866']	1
AC099811.6	1	['chr17: 42423866']	1
STAT5A	1	['chr17: 42423866']	1
STAT3	1	['chr17: 42423866']	1
CAVIN1	1	['chr17: 42423866']	1
ATP6V0A1	1	['chr17: 42423866']	1
NAGLU	1	['chr17: 42423866']	1
HSD17B1	1	['chr17: 42423866']	1
COASY	1	['chr17: 42423866']	1
MLX	1	['chr17: 42423866']	1
BCOR	1	['chrX: 40943975']	1
ATP6AP2	1	['chrX: 40943975']	1
MPC1L	1	['chrX: 40943975']	1
CXorf38	1	['chrX: 40943975']	1
MED14	1	['chrX: 40943975']	1
USP9X	1	['chrX: 40943975']	1
DDX3X	1	['chrX: 40943975']	1
NYX	1	['chrX: 40943975']	1
SH2D1A	1	['chrX: 125186709']	1
TEX13D	1	['chrX: 125186709']	1
TENM1	1	['chrX: 125186709']	1
TEX13C	1	['chrX: 125186709']	1
AL645820.1	1	['chrX: 125186709']	1
DCAF12L2	1	['chrX: 125186709']	1
DCAF12L1	1	['chrX: 125186709']	1
PRR32	1	['chrX: 125186709']	1
ADGRG6	1	['chr6: 143494096 ']	1
HIVEP2	1	['chr6: 143494096 ']	1
AIG1	1	['chr6: 143494096 ']	1
ADAT2	1	['chr6: 143494096 ']	1
PEX3	1	['chr6: 143494096 ']	1
FUCA2	1	['chr6: 143494096 ']	1
PHACTR2	1	['chr6: 143494096 ']	1
AL049844.1	1	['chr6: 143494096 ']	1
LTV1	1	['chr6: 143494096 ']	1
AL049844.3	1	['chr6: 143494096 ']	1
PHC1	1	['chr12: 9488657 ']	1
M6PR	1	['chr12: 9488657 ']	1
KLRG1	1	['chr12: 9488657 ']	1
A2M	1	['chr12: 9488657 ']	1
PZP	1	['chr12: 9488657 ']	1
KLRB1	1	['chr12: 9488657 ']	1
CLEC2D	1	['chr12: 9488657 ']	1
CLECL1	1	['chr12: 9488657 ']	1
CD69	1	['chr12: 9488657 ']	1
KLRF1	1	['chr12: 9488657 ']	1
FLNC	1	['chr7: 128939209 ']	1
KCP	1	['chr7: 128939209 ']	1
ATP6V1F	1	['chr7: 128939209 ']	1
ATP6V1FNB	1	['chr7: 128939209 ']	1
IRF5	1	['chr7: 128939209 ']	1
AC025594.2	1	['chr7: 128939209 ']	1
TNPO3	1	['chr7: 128939209 ']	1
AC011005.1	1	['chr7: 128939209 ']	1
TSPAN33	1	['chr7: 128939209 ']	1
SMO	1	['chr7: 128939209 ']	1
PEAR1	1	['chr1: 157325675 ']	1
LRRC71	1	['chr1: 157325675 ']	1
ARHGEF11	1	['chr1: 157325675 ']	1
ETV3L	1	['chr1: 157325675 ']	1
ETV3	1	['chr1: 157325675 ']	1
FCRL5	1	['chr1: 157325675 ']	1
FCRL4	1	['chr1: 157325675 ']	1
FCRL3	1	['chr1: 157325675 ']	1
FCRL2	1	['chr1: 157325675 ']	1
FCRL1	1	['chr1: 157325675 ']	1
HSD17B12	1	['chr11: 43950323 ']	1
ALKBH3	1	['chr11: 43950323 ']	1
C11orf96	1	['chr11: 43950323 ']	1
ACCSL	1	['chr11: 43950323 ']	1
ACCS	1	['chr11: 43950323 ']	1
EXT2	1	['chr11: 43950323 ']	1
ALX4	1	['chr11: 43950323 ']	1
CD82	1	['chr11: 43950323 ']	1
SLX4	1	['chr16: 4045089 ']	1
DNASE1	1	['chr16: 4045089 ']	1
TRAP1	1	['chr16: 4045089 ']	1
CREBBP	1	['chr16: 4045089 ']	1
ADCY9	1	['chr16: 4045089 ']	1
SRL	1	['chr16: 4045089 ']	1
TFAP4	1	['chr16: 4045089 ']	1
GLIS2	1	['chr16: 4045089 ']	1
PAM16	1	['chr16: 4045089 ']	1
CORO7-PAM16	1	['chr16: 4045089 ']	1
SH3BP4	1	['chr2: 236560246']	1
AGAP1	1	['chr2: 236560246']	1
GBX2	1	['chr2: 236560246']	1
ASB18	1	['chr2: 236560246']	1
IQCA1	1	['chr2: 236560246']	1
ACKR3	1	['chr2: 236560246']	1
COPS8	1	['chr2: 236560246']	1
COL6A3	1	['chr2: 236560246']	1
MLPH	1	['chr2: 236560246']	1
PRLH	1	['chr2: 236560246']	1
GFRAL	1	['chr6: 56941734 ']	1
HMGCLL1	1	['chr6: 56941734 ']	1
BMP5	1	['chr6: 56941734 ']	1
COL21A1	1	['chr6: 56941734 ']	1
DST	1	['chr6: 56941734 ']	1
BEND6	1	['chr6: 56941734 ']	1
KIAA1586	1	['chr6: 56941734 ']	1
ZNF451	1	['chr6: 56941734 ']	1
BAG2	1	['chr6: 56941734 ']	1
RAB23	1	['chr6: 56941734 ']	1
VANGL1	1	['chr1: 116313674']	1
CASQ2	1	['chr1: 116313674']	1
NHLH2	1	['chr1: 116313674']	1
SLC22A15	1	['chr1: 116313674']	1
MAB21L3	1	['chr1: 116313674']	1
ATP1A1	1	['chr1: 116313674']	1
CD58	1	['chr1: 116313674']	1
IGSF3	1	['chr1: 116313674']	1
CD2	1	['chr1: 116313674']	1
PTGFRN	1	['chr1: 116313674']	1
SCAPER	1	['chr15: 77090180']	1
RCN2	1	['chr15: 77090180']	1
PSTPIP1	1	['chr15: 77090180']	1
TSPAN3	1	['chr15: 77090180']	1
AC090181.3	1	['chr15: 77090180']	1
PEAK1	1	['chr15: 77090180']	1
HMG20A	1	['chr15: 77090180']	1
AC090984.1	1	['chr15: 77090180']	1
LINGO1	1	['chr15: 77090180']	1
AC105133.2	1	['chr15: 77090180']	1
EFR3B	1	['chr2: 25902572']	1
POMC	1	['chr2: 25902572']	1
DNMT3A	1	['chr2: 25902572']	1
DTNB	1	['chr2: 25902572']	1
ASXL2	1	['chr2: 25902572']	1
KIF3C	1	['chr2: 25902572']	1
RAB10	1	['chr2: 25902572']	1
GAREM2	1	['chr2: 25902572']	1
HADHA	1	['chr2: 25902572']	1
HADHB	1	['chr2: 25902572']	1
DEFB112	1	['chr6: 52197333']	1
TFAP2D	1	['chr6: 52197333']	1
TFAP2B	1	['chr6: 52197333']	1
PKHD1	1	['chr6: 52197333']	1
IL17A	1	['chr6: 52197333']	1
IL17F	1	['chr6: 52197333']	1
MCM3	1	['chr6: 52197333']	1
PAQR8	1	['chr6: 52197333']	1
EFHC1	1	['chr6: 52197333']	1
TRAM2	1	['chr6: 52197333']	1
SLC10A5	1	['chr8: 81929599']	1
AC132219.2	1	['chr8: 81929599']	1
ZFAND1	1	['chr8: 81929599']	1
CHMP4C	1	['chr8: 81929599']	1
SNX16	1	['chr8: 81929599']	1
RALYL	1	['chr8: 81929599']	1
LRRCC1	1	['chr8: 81929599']	1
E2F5	1	['chr8: 81929599']	1
C8orf59	1	['chr8: 81929599']	1
CA13	1	['chr8: 81929599']	1
WASF3	1	['chr13: 27396418 ']	1
GPR12	1	['chr13: 27396418 ']	1
USP12	1	['chr13: 27396418 ']	1
RPL21	1	['chr13: 27396418 ']	1
RASL11A	1	['chr13: 27396418 ']	1
GTF3A	1	['chr13: 27396418 ']	1
MTIF3	1	['chr13: 27396418 ']	1
LNX2	1	['chr13: 27396418 ']	1
POLR1D	1	['chr13: 27396418 ']	1
GSX1	1	['chr13: 27396418 ']	1
GPBP1	1	['chr5: 58872998']	1
ACTBL2	1	['chr5: 58872998']	1
PLK2	1	['chr5: 58872998']	1
GAPT	1	['chr5: 58872998']	1
RAB3C	1	['chr5: 58872998']	1
PDE4D	1	['chr5: 58872998']	1
DEPDC1B	1	['chr5: 58872998']	1
ELOVL7	1	['chr5: 58872998']	1
ERCC8	1	['chr5: 58872998']	1
NDUFAF2	1	['chr5: 58872998']	1
TACR1	1	['chr2: 77774499']	1
EVA1A	1	['chr2: 77774499']	1
MRPL19	1	['chr2: 77774499']	1
GCFC2	1	['chr2: 77774499']	1
LRRTM4	1	['chr2: 77774499']	1
REG3G	1	['chr2: 77774499']	1
REG1B	1	['chr2: 77774499']	1
REG1A	1	['chr2: 77774499']	1
REG3A	1	['chr2: 77774499']	1
CTNNA2	1	['chr2: 77774499']	1
MID1	1	['chrX: 11911178']	1
HCCS	1	['chrX: 11911178']	1
ARHGAP6	1	['chrX: 11911178']	1
AMELX	1	['chrX: 11911178']	1
MSL3	1	['chrX: 11911178']	1
FRMPD4	1	['chrX: 11911178']	1
PRPS2	1	['chrX: 11911178']	1
TLR7	1	['chrX: 11911178']	1
TLR8	1	['chrX: 11911178']	1
TMSB4X	1	['chrX: 11911178']	1
GNAQ	1	['chr9: 81564979 ']	1
CEP78	1	['chr9: 81564979 ']	1
PSAT1	1	['chr9: 81564979 ']	1
TLE4	1	['chr9: 81564979 ']	1
AL161912.4	1	['chr9: 81564979 ']	1
TLE1	1	['chr9: 81564979 ']	1
SPATA31D4	1	['chr9: 81564979 ']	1
SPATA31D3	1	['chr9: 81564979 ']	1
SPATA31D1	1	['chr9: 81564979 ']	1
AL356490.1	1	['chr9: 81564979 ']	1
KIF6	1	['chr6: 40603547']	1
DAAM2	1	['chr6: 40603547']	1
AL592158.1	1	['chr6: 40603547']	1
MOCS1	1	['chr6: 40603547']	1
LRFN2	1	['chr6: 40603547']	1
UNC5CL	1	['chr6: 40603547']	1
OARD1	1	['chr6: 40603547']	1
TSPO2	1	['chr6: 40603547']	1
APOBEC2	1	['chr6: 40603547']	1
NFYA	1	['chr6: 40603547']	1
BNIP2	1	['chr15: 61231050']	1
FOXB1	1	['chr15: 61231050']	1
ANXA2	1	['chr15: 61231050']	1
CEP57	1	['chr11: 98600890']	1
MTMR2	1	['chr11: 98600890']	1
MAML2	1	['chr11: 98600890']	1
CCDC82	1	['chr11: 98600890']	1
JRKL	1	['chr11: 98600890']	1
CNTN5	1	['chr11: 98600890']	1
ARHGAP42	1	['chr11: 98600890']	1
PGR	1	['chr11: 98600890']	1
TRPC6	1	['chr11: 98600890']	1
ANGPTL5	1	['chr11: 98600890']	1
AC021945.1	1	['chr8: 120445481 ']	1
DEPTOR	1	['chr8: 120445481 ']	1
COL14A1	1	['chr8: 120445481 ']	1
MRPL13	1	['chr8: 120445481 ']	1
MTBP	1	['chr8: 120445481 ']	1
SNTB1	1	['chr8: 120445481 ']	1
HAS2	1	['chr8: 120445481 ']	1
ZHX2	1	['chr8: 120445481 ']	1
DERL1	1	['chr8: 120445481 ']	1
TBC1D31	1	['chr8: 120445481 ']	1
LAMTOR1	1	['chr11: 72191212 ']	1
AP000812.4	1	['chr11: 72191212 ']	1
ANAPC15	1	['chr11: 72191212 ']	1
FOLR3	1	['chr11: 72191212 ']	1
FOLR1	1	['chr11: 72191212 ']	1
FOLR2	1	['chr11: 72191212 ']	1
INPPL1	1	['chr11: 72191212 ']	1
PHOX2A	1	['chr11: 72191212 ']	1
CLPB	1	['chr11: 72191212 ']	1
PDE2A	1	['chr11: 72191212 ']	1
RAX	1	['chr18: 60242180']	1
CPLX4	1	['chr18: 60242180']	1
LMAN1	1	['chr18: 60242180']	1
CCBE1	1	['chr18: 60242180']	1
PMAIP1	1	['chr18: 60242180']	1
MC4R	1	['chr18: 60242180']	1
CDH20	1	['chr18: 60242180']	1
RNF152	1	['chr18: 60242180']	1
PIGN	1	['chr18: 60242180']	1
KIAA1468	1	['chr18: 60242180']	1
GPC2	1	['chr7: 100337575 ']	1
STAG3	1	['chr7: 100337575 ']	1
CASTOR3	1	['chr7: 100337575 ']	1
PVRIG	1	['chr7: 100337575 ']	1
SPDYE3	1	['chr7: 100337575 ']	1
PILRB	1	['chr7: 100337575 ']	1
PILRA	1	['chr7: 100337575 ']	1
ZCWPW1	1	['chr7: 100337575 ']	1
MEPCE	1	['chr7: 100337575 ']	1
PPP1R35	1	['chr7: 100337575 ']	1
PHKA2	1	['chrX: 19894167 ']	1
ADGRG2	1	['chrX: 19894167 ']	1
PDHA1	1	['chrX: 19894167 ']	1
MAP3K15	1	['chrX: 19894167 ']	1
SH3KBP1	1	['chrX: 19894167 ']	1
BCLAF3	1	['chrX: 19894167 ']	1
MAP7D2	1	['chrX: 19894167 ']	1
EIF1AX	1	['chrX: 19894167 ']	1
RPS6KA3	1	['chrX: 19894167 ']	1
CNKSR2	1	['chrX: 19894167 ']	1
AC027348.2	1	['chr16: 50140415']	1
AC007603.2	1	['chr16: 50140415']	1
CNEP1R1	1	['chr16: 50140415']	1
HEATR3	1	['chr16: 50140415']	1
AC007610.4	1	['chr16: 50140415']	1
TENT4B	1	['chr16: 50140415']	1
ADCY7	1	['chr16: 50140415']	1
BRD7	1	['chr16: 50140415']	1
NKD1	1	['chr16: 50140415']	1
AC007608.4	1	['chr16: 50140415']	1
HMGCS2	1	['chr1: 120521201 ']	1
REG4	1	['chr1: 120521201 ']	1
ADAM30	1	['chr1: 120521201 ']	1
NOTCH2	1	['chr1: 120521201 ']	1
SEC22B	1	['chr1: 120521201 ']	1
NBPF26	1	['chr1: 120521201 ']	1
PPIAL4A	1	['chr1: 120521201 ']	1
AC241377.3	1	['chr1: 120521201 ']	1
FCGR1B	1	['chr1: 120521201 ']	1
FAM72B	1	['chr1: 120521201 ']	1
AP001002.1	1	['chr11: 91656449']	1
AP001002.2	1	['chr11: 91656449']	1
AP003485.2	1	['chr11: 91656449']	1
AP003485.1	1	['chr11: 91656449']	1
AP002791.1	1	['chr11: 91656449']	1
AP002799.1	1	['chr11: 91656449']	1
FAT3	1	['chr11: 91656449']	1
MTNR1B	1	['chr11: 91656449']	1
AP002371.1	1	['chr11: 91656449']	1
AP003072.4	1	['chr11: 91656449']	1
AC097372.4	1	['chr4: 147131329']	1
SLC10A7	1	['chr4: 147131329']	1
POU4F2	1	['chr4: 147131329']	1
TTC29	1	['chr4: 147131329']	1
AC092435.4	1	['chr4: 147131329']	1
EDNRA	1	['chr4: 147131329']	1
AC093908.1	1	['chr4: 147131329']	1
TMEM184C	1	['chr4: 147131329']	1
PRMT9	1	['chr4: 147131329']	1
ARHGAP10	1	['chr4: 147131329']	1
CCDC190	1	['chr1: 165071923']	1
RGS4	1	['chr1: 165071923']	1
RGS5	1	['chr1: 165071923']	1
NUF2	1	['chr1: 165071923']	1
PBX1	1	['chr1: 165071923']	1
LMX1A	1	['chr1: 165071923']	1
RXRG	1	['chr1: 165071923']	1
LRRC52	1	['chr1: 165071923']	1
MGST3	1	['chr1: 165071923']	1
ALDH9A1	1	['chr1: 165071923']	1
SKA3	1	['chr13: 22795283']	1
MRPL57	1	['chr13: 22795283']	1
ZDHHC20	1	['chr13: 22795283']	1
MICU2	1	['chr13: 22795283']	1
FGF9	1	['chr13: 22795283']	1
SGCG	1	['chr13: 22795283']	1
SACS	1	['chr13: 22795283']	1
TNFRSF19	1	['chr13: 22795283']	1
MIPEP	1	['chr13: 22795283']	1
C1QTNF9B	1	['chr13: 22795283']	1
VLDLR	1	['chr9: 4093437 ']	1
KCNV2	1	['chr9: 4093437 ']	1
PUM3	1	['chr9: 4093437 ']	1
RFX3	1	['chr9: 4093437 ']	1
GLIS3	1	['chr9: 4093437 ']	1
SLC1A1	1	['chr9: 4093437 ']	1
SPATA6L	1	['chr9: 4093437 ']	1
PLPP6	1	['chr9: 4093437 ']	1
CDC37L1	1	['chr9: 4093437 ']	1
AK3	1	['chr9: 4093437 ']	1
TRA2A	1	['chr7: 24467390']	1
CCDC126	1	['chr7: 24467390']	1
FAM221A	1	['chr7: 24467390']	1
STK31	1	['chr7: 24467390']	1
NPY	1	['chr7: 24467390']	1
MPP6	1	['chr7: 24467390']	1
GSDME	1	['chr7: 24467390']	1
OSBPL3	1	['chr7: 24467390']	1
CYCS	1	['chr7: 24467390']	1
C7orf31	1	['chr7: 24467390']	1
TMEM189	1	['chr20: 50212767']	1
CEBPB	1	['chr20: 50212767']	1
PTPN1	1	['chr20: 50212767']	1
RIPOR3	1	['chr20: 50212767']	1
PARD6B	1	['chr20: 50212767']	1
BCAS4	1	['chr20: 50212767']	1
ADNP	1	['chr20: 50212767']	1
PPM1H	1	['chr12: 63123236']	1
AVPR1A	1	['chr12: 63123236']	1
AC135584.1	1	['chr12: 63123236']	1
DPY19L2	1	['chr12: 63123236']	1
RXYLT1	1	['chr12: 63123236']	1
SRGAP1	1	['chr12: 63123236']	1
TGFBR3L	1	['chr19: 7969061 ']	1
SNAPC2	1	['chr19: 7969061 ']	1
CTXN1	1	['chr19: 7969061 ']	1
TIMM44	1	['chr19: 7969061 ']	1
ELAVL1	1	['chr19: 7969061 ']	1
CCL25	1	['chr19: 7969061 ']	1
FBN3	1	['chr19: 7969061 ']	1
CERS4	1	['chr19: 7969061 ']	1
CD320	1	['chr19: 7969061 ']	1
AC010323.1	1	['chr19: 7969061 ']	1
CDH12	1	['chr5: 25439614 ']	1
PRDM9	1	['chr5: 25439614 ']	1
CDH10	1	['chr5: 25439614 ']	1
AC106754.2	1	['chr5: 25439614 ']	1
AC022140.2	1	['chr5: 25439614 ']	1
AC022418.1	1	['chr5: 25439614 ']	1
CDH9	1	['chr5: 25439614 ']	1
AC018765.1	1	['chr5: 25439614 ']	1
CDH6	1	['chr5: 25439614 ']	1
DROSHA	1	['chr5: 25439614 ']	1
GTF2A1L	1	['chr2: 53176953']	1
AC073082.1	1	['chr2: 53176953']	1
LHCGR	1	['chr2: 53176953']	1
FSHR	1	['chr2: 53176953']	1
NRXN1	1	['chr2: 53176953']	1
ASB3	1	['chr2: 53176953']	1
GPR75-ASB3	1	['chr2: 53176953']	1
CHAC2	1	['chr2: 53176953']	1
ERLEC1	1	['chr2: 53176953']	1
GPR75	1	['chr2: 53176953']	1
AC069528.2	1	['chr3: 147409323 ']	1
PLSCR1	1	['chr3: 147409323 ']	1
PLSCR5	1	['chr3: 147409323 ']	1
ZIC4	1	['chr3: 147409323 ']	1
ZIC1	1	['chr3: 147409323 ']	1
AGTR1	1	['chr3: 147409323 ']	1
CPB1	1	['chr3: 147409323 ']	1
CPA3	1	['chr3: 147409323 ']	1
GYG1	1	['chr3: 147409323 ']	1
HLTF	1	['chr3: 147409323 ']	1
GDA	1	['chr9: 73908491']	1
ZFAND5	1	['chr9: 73908491']	1
TMC1	1	['chr9: 73908491']	1
ALDH1A1	1	['chr9: 73908491']	1
ANXA1	1	['chr9: 73908491']	1
RORB	1	['chr9: 73908491']	1
TRPM6	1	['chr9: 73908491']	1
C9orf40	1	['chr9: 73908491']	1
CARNMT1	1	['chr9: 73908491']	1
NMRK1	1	['chr9: 73908491']	1
NKX3-1	1	['chr8: 24437438 ']	1
NKX2-6	1	['chr8: 24437438 ']	1
STC1	1	['chr8: 24437438 ']	1
ADAM28	1	['chr8: 24437438 ']	1
ADAMDEC1	1	['chr8: 24437438 ']	1
ADAM7	1	['chr8: 24437438 ']	1
NEFM	1	['chr8: 24437438 ']	1
ENKUR	1	['chr10: 26366309']	1
THNSL1	1	['chr10: 26366309']	1
GPR158	1	['chr10: 26366309']	1
MYO3A	1	['chr10: 26366309']	1
OR4C16	1	['chr11: 55692835']	1
OR4C11	1	['chr11: 55692835']	1
OR4P4	1	['chr11: 55692835']	1
OR4S2	1	['chr11: 55692835']	1
OR4C6	1	['chr11: 55692835']	1
OR5D3P	1	['chr11: 55692835']	1
OR5D13	1	['chr11: 55692835']	1
OR5D14	1	['chr11: 55692835']	1
OR5L1	1	['chr11: 55692835']	1
OR5D18	1	['chr11: 55692835']	1
PPP2R2D	1	['chr10: 131406357']	1
BNIP3	1	['chr10: 131406357']	1
AL162274.3	1	['chr10: 131406357']	1
JAKMIP3	1	['chr10: 131406357']	1
NEURL2	1	['chr20: 45993823 ']	1
CTSA	1	['chr20: 45993823 ']	1
PLTP	1	['chr20: 45993823 ']	1
PCIF1	1	['chr20: 45993823 ']	1
ZNF335	1	['chr20: 45993823 ']	1
MMP9	1	['chr20: 45993823 ']	1
SLC12A5	1	['chr20: 45993823 ']	1
NCOA5	1	['chr20: 45993823 ']	1
CD40	1	['chr20: 45993823 ']	1
CDH22	1	['chr20: 45993823 ']	1
SPANXD	1	['chrX: 143464562 ']	1
MAGEC3	1	['chrX: 143464562 ']	1
MAGEC1	1	['chrX: 143464562 ']	1
MAGEC2	1	['chrX: 143464562 ']	1
SPANXN4	1	['chrX: 143464562 ']	1
SPANXN3	1	['chrX: 143464562 ']	1
SLITRK4	1	['chrX: 143464562 ']	1
SPANXN2	1	['chrX: 143464562 ']	1
UBE2NL	1	['chrX: 143464562 ']	1
SPANXN1	1	['chrX: 143464562 ']	1
ZC3H12B	1	['chrX: 66279221']	1
TRAJ4	1	['chr14: 22562728']	1
TRAJ3	1	['chr14: 22562728']	1
TRAJ2	1	['chr14: 22562728']	1
TRAJ1	1	['chr14: 22562728']	1
TRAC	1	['chr14: 22562728']	1
DAD1	1	['chr14: 22562728']	1
ABHD4	1	['chr14: 22562728']	1
OR6J1	1	['chr14: 22562728']	1
OXA1L	1	['chr14: 22562728']	1
SLC7A7	1	['chr14: 22562728']	1
PSME4	1	['chr2: 54560781 ']	1
ACYP2	1	['chr2: 54560781 ']	1
TSPYL6	1	['chr2: 54560781 ']	1
C2orf73	1	['chr2: 54560781 ']	1
SPTBN1	1	['chr2: 54560781 ']	1
EML6	1	['chr2: 54560781 ']	1
RTN4	1	['chr2: 54560781 ']	1
CLHC1	1	['chr2: 54560781 ']	1
RPS27A	1	['chr2: 54560781 ']	1
MTIF2	1	['chr2: 54560781 ']	1
AL603832.3	1	['chr1: 113299744']	1
PPM1J	1	['chr1: 113299744']	1
FAM19A3	1	['chr1: 113299744']	1
SLC16A1	1	['chr1: 113299744']	1
LRIG2	1	['chr1: 113299744']	1
MAGI3	1	['chr1: 113299744']	1
PHTF1	1	['chr1: 113299744']	1
RSBN1	1	['chr1: 113299744']	1
PTPN22	1	['chr1: 113299744']	1
BCL2L15	1	['chr1: 113299744']	1
KIF25	1	['chr6: 168858621']	1
FRMD1	1	['chr6: 168858621']	1
DACT2	1	['chr6: 168858621']	1
SMOC2	1	['chr6: 168858621']	1
AL513210.1	1	['chr6: 168858621']	1
AL109924.4	1	['chr6: 168858621']	1
THBS2	1	['chr6: 168858621']	1
WDR27	1	['chr6: 168858621']	1
C6orf120	1	['chr6: 168858621']	1
PHF10	1	['chr6: 168858621']	1
C1orf100	1	['chr1: 244734376']	1
ADSS	1	['chr1: 244734376']	1
CATSPERE	1	['chr1: 244734376']	1
DESI2	1	['chr1: 244734376']	1
AL451007.3	1	['chr1: 244734376']	1
COX20	1	['chr1: 244734376']	1
HNRNPU	1	['chr1: 244734376']	1
EFCAB2	1	['chr1: 244734376']	1
KIF26B	1	['chr1: 244734376']	1
SMYD3	1	['chr1: 244734376']	1
FOXI2	1	['chr10: 129806134 ']	1
CLRN3	1	['chr10: 129806134 ']	1
PTPRE	1	['chr10: 129806134 ']	1
MKI67	1	['chr10: 129806134 ']	1
AC090772.4	1	['chr18: 24627962 ']	1
CABYR	1	['chr18: 24627962 ']	1
OSBPL1A	1	['chr18: 24627962 ']	1
IMPACT	1	['chr18: 24627962 ']	1
HRH4	1	['chr18: 24627962 ']	1
ZNF521	1	['chr18: 24627962 ']	1
AC105114.1	1	['chr18: 24627962 ']	1
SS18	1	['chr18: 24627962 ']	1
PSMA8	1	['chr18: 24627962 ']	1
TAF4B	1	['chr18: 24627962 ']	1
AC108704.2	1	['chr12: 129976375']	1
GLT1D1	1	['chr12: 129976375']	1
TMEM132D	1	['chr12: 129976375']	1
AC079456.1	1	['chr12: 129976375']	1
AC055717.3	1	['chr12: 129976375']	1
AC026336.4	1	['chr12: 129976375']	1
AC026336.5	1	['chr12: 129976375']	1
FZD10	1	['chr12: 129976375']	1
PIWIL1	1	['chr12: 129976375']	1
AC127071.1	1	['chr12: 129976375']	1
KIAA0930	1	['chr22: 45464960']	1
UPK3A	1	['chr22: 45464960']	1
FAM118A	1	['chr22: 45464960']	1
SMC1B	1	['chr22: 45464960']	1
RIBC2	1	['chr22: 45464960']	1
FBLN1	1	['chr22: 45464960']	1
ATXN10	1	['chr22: 45464960']	1
WNT7B	1	['chr22: 45464960']	1
BX537318.2	1	['chr22: 45464960']	1
PRR34	1	['chr22: 45464960']	1
AC016168.3	1	['chr17: 77894431']	1
SEC14L1	1	['chr17: 77894431']	1
SEPT9	1	['chr17: 77894431']	1
AC111170.3	1	['chr17: 77894431']	1
AC021683.4	1	['chr17: 77894431']	1
TNRC6C	1	['chr17: 77894431']	1
AC015804.1	1	['chr17: 77894431']	1
TMC6	1	['chr17: 77894431']	1
TMC8	1	['chr17: 77894431']	1
C17orf99	1	['chr17: 77894431']	1
TMEM56	1	['chr1: 98021128 ']	1
TMEM56-RWDD3	1	['chr1: 98021128 ']	1
RWDD3	1	['chr1: 98021128 ']	1
PTBP2	1	['chr1: 98021128 ']	1
DPYD	1	['chr1: 98021128 ']	1
AC095031.1	1	['chr1: 98021128 ']	1
SNX7	1	['chr1: 98021128 ']	1
PLPPR5	1	['chr1: 98021128 ']	1
PLPPR4	1	['chr1: 98021128 ']	1
PALMD	1	['chr1: 98021128 ']	1
GABBR2	1	['chr9: 99202085']	1
ANKS6	1	['chr9: 99202085']	1
GALNT12	1	['chr9: 99202085']	1
COL15A1	1	['chr9: 99202085']	1
TGFBR1	1	['chr9: 99202085']	1
ALG2	1	['chr9: 99202085']	1
SEC61B	1	['chr9: 99202085']	1
NR4A3	1	['chr9: 99202085']	1
STX17	1	['chr9: 99202085']	1
ERP44	1	['chr9: 99202085']	1
PPP1R12B	1	['chr1: 202938530 ']	1
SYT2	1	['chr1: 202938530 ']	1
KDM5B	1	['chr1: 202938530 ']	1
RABIF	1	['chr1: 202938530 ']	1
KLHL12	1	['chr1: 202938530 ']	1
ADIPOR1	1	['chr1: 202938530 ']	1
CYB5R1	1	['chr1: 202938530 ']	1
TMEM183A	1	['chr1: 202938530 ']	1
PPFIA4	1	['chr1: 202938530 ']	1
MYOG	1	['chr1: 202938530 ']	1
ADIRF	1	['chr10: 87294109 ']	1
FAM25A	1	['chr10: 87294109 ']	1
EIF5AL1	1	['chr10: 79771960 ']	1
SFTPA2	1	['chr10: 79771960 ']	1
SFTPA1	1	['chr10: 79771960 ']	1
AL132656.4	1	['chr10: 79771960 ']	1
NUTM2B	1	['chr10: 79771960 ']	1
NUTM2E	1	['chr10: 79771960 ']	1
SFTPD	1	['chr10: 79771960 ']	1
AL512662.1	1	['chr10: 79771960 ']	1
TMEM254	1	['chr10: 79771960 ']	1
AL356095.2	1	['chr10: 79771960 ']	1
KLLN	1	['chr10: 87443841']	1
PTEN	1	['chr10: 87443841']	1
EFNB1	1	['chrX: 66937900']	1
MGARP	1	['chr4: 139651636 ']	1
NDUFC1	1	['chr4: 139651636 ']	1
NAA15	1	['chr4: 139651636 ']	1
RAB33B	1	['chr4: 139651636 ']	1
SETD7	1	['chr4: 139651636 ']	1
MGST2	1	['chr4: 139651636 ']	1
MAML3	1	['chr4: 139651636 ']	1
SCOC	1	['chr4: 139651636 ']	1
CLGN	1	['chr4: 139651636 ']	1
MGAT4D	1	['chr4: 139651636 ']	1
ILK	1	['chr11: 6713375']	1
TAF10	1	['chr11: 6713375']	1
TPP1	1	['chr11: 6713375']	1
DCHS1	1	['chr11: 6713375']	1
MRPL17	1	['chr11: 6713375']	1
OR2AG2	1	['chr11: 6713375']	1
OR2AG1	1	['chr11: 6713375']	1
OR6A2	1	['chr11: 6713375']	1
OR10A5	1	['chr11: 6713375']	1
OR10A2	1	['chr11: 6713375']	1
CDKL4	1	['chr2: 41469032']	1
MAP4K3	1	['chr2: 41469032']	1
TMEM178A	1	['chr2: 41469032']	1
THUMPD2	1	['chr2: 41469032']	1
SLC8A1	1	['chr2: 41469032']	1
C2orf91	1	['chr2: 41469032']	1
PKDCC	1	['chr2: 41469032']	1
EML4	1	['chr2: 41469032']	1
COX7A2L	1	['chr2: 41469032']	1
KCNG3	1	['chr2: 41469032']	1
AL355916.3	1	['chr14: 62172322']	1
HIF1A	1	['chr14: 62172322']	1
SNAPC1	1	['chr14: 62172322']	1
AL137918.1	1	['chr14: 62172322']	1
SYT16	1	['chr14: 62172322']	1
KCNH5	1	['chr14: 62172322']	1
RHOJ	1	['chr14: 62172322']	1
GPHB5	1	['chr14: 62172322']	1
PPP2R5E	1	['chr14: 62172322']	1
WDR89	1	['chr14: 62172322']	1
SCAF8	1	['chr6: 155556696']	1
TIAM2	1	['chr6: 155556696']	1
TFB1M	1	['chr6: 155556696']	1
CLDN20	1	['chr6: 155556696']	1
NOX3	1	['chr6: 155556696']	1
ARID1B	1	['chr6: 155556696']	1
TMEM242	1	['chr6: 155556696']	1
ZDHHC14	1	['chr6: 155556696']	1
SNX9	1	['chr6: 155556696']	1
SYNJ2	1	['chr6: 155556696']	1
MAGEB4	1	['chrX: 30790464']	1
MAGEB1	1	['chrX: 30790464']	1
NR0B1	1	['chrX: 30790464']	1
CXorf21	1	['chrX: 30790464']	1
GK	1	['chrX: 30790464']	1
TAB3	1	['chrX: 30790464']	1
FTHL17	1	['chrX: 30790464']	1
DMD	1	['chrX: 30790464']	1
FAM47A	1	['chrX: 30790464']	1
TMEM47	1	['chrX: 30790464']	1
PPM1L	1	['chr3: 161561866']	1
B3GALNT1	1	['chr3: 161561866']	1
NMD3	1	['chr3: 161561866']	1
SPTSSB	1	['chr3: 161561866']	1
OTOL1	1	['chr3: 161561866']	1
SI	1	['chr3: 161561866']	1
SLITRK3	1	['chr3: 161561866']	1
BCHE	1	['chr3: 161561866']	1
ZBBX	1	['chr3: 161561866']	1
SERPINI2	1	['chr3: 161561866']	1
HSPA4	1	['chr5: 133784509']	1
AC113410.3	1	['chr5: 133784509']	1
FSTL4	1	['chr5: 133784509']	1
AC010608.3	1	['chr5: 133784509']	1
AC010608.2	1	['chr5: 133784509']	1
C5orf15	1	['chr5: 133784509']	1
VDAC1	1	['chr5: 133784509']	1
TCF7	1	['chr5: 133784509']	1
SKP1	1	['chr5: 133784509']	1
AC104109.3	1	['chr5: 133784509']	1
TMEM219	1	['chr16: 30021011 ']	1
TAOK2	1	['chr16: 30021011 ']	1
HIRIP3	1	['chr16: 30021011 ']	1
INO80E	1	['chr16: 30021011 ']	1
DOC2A	1	['chr16: 30021011 ']	1
C16orf92	1	['chr16: 30021011 ']	1
FAM57B	1	['chr16: 30021011 ']	1
AC093512.2	1	['chr16: 30021011 ']	1
ALDOA	1	['chr16: 30021011 ']	1
PPP4C	1	['chr16: 30021011 ']	1
CARD14	1	['chr17: 80400548 ']	1
SGSH	1	['chr17: 80400548 ']	1
SLC26A11	1	['chr17: 80400548 ']	1
RNF213	1	['chr17: 80400548 ']	1
AC124319.4	1	['chr17: 80400548 ']	1
ENDOV	1	['chr17: 80400548 ']	1
AC120024.4	1	['chr17: 80400548 ']	1
NPTX1	1	['chr17: 80400548 ']	1
RPTOR	1	['chr17: 80400548 ']	1
CHMP6	1	['chr17: 80400548 ']	1
ALDH3A2	1	['chr17: 19893113']	1
SLC47A2	1	['chr17: 19893113']	1
ALDH3A1	1	['chr17: 19893113']	1
ULK2	1	['chr17: 19893113']	1
AC015726.3	1	['chr17: 19893113']	1
AKAP10	1	['chr17: 19893113']	1
SPECC1	1	['chr17: 19893113']	1
LGALS9B	1	['chr17: 19893113']	1
CDRT15L2	1	['chr17: 19893113']	1
CCDC144NL	1	['chr17: 19893113']	1
C5orf34	1	['chr5: 44763778 ']	1
PAIP1	1	['chr5: 44763778 ']	1
AC010435.1	1	['chr5: 44763778 ']	1
NNT	1	['chr5: 44763778 ']	1
FGF10	1	['chr5: 44763778 ']	1
MRPS30	1	['chr5: 44763778 ']	1
HCN1	1	['chr5: 44763778 ']	1
EMB	1	['chr5: 44763778 ']	1
PARP8	1	['chr5: 44763778 ']	1
ISL1	1	['chr5: 44763778 ']	1
C21orf91	1	['chr21: 24424088']	1
CHODL	1	['chr21: 24424088']	1
TMPRSS15	1	['chr21: 24424088']	1
AL157359.3	1	['chr21: 24424088']	1
NCAM2	1	['chr21: 24424088']	1
AP001340.1	1	['chr21: 24424088']	1
MRPL39	1	['chr21: 24424088']	1
JAM2	1	['chr21: 24424088']	1
ATP5PF	1	['chr21: 24424088']	1
GABPA	1	['chr21: 24424088']	1
ID4	1	['chr6: 21813553 ']	1
MBOAT1	1	['chr6: 21813553 ']	1
E2F3	1	['chr6: 21813553 ']	1
CDKAL1	1	['chr6: 21813553 ']	1
SOX4	1	['chr6: 21813553 ']	1
AL136313.1	1	['chr6: 21813553 ']	1
PRL	1	['chr6: 21813553 ']	1
HDGFL1	1	['chr6: 21813553 ']	1
NRSN1	1	['chr6: 21813553 ']	1
DCDC2	1	['chr6: 21813553 ']	1
AC243756.1	1	['chr1: 147385106 ']	1
NBPF12	1	['chr1: 147385106 ']	1
PRKAB2	1	['chr1: 147385106 ']	1
FMO5	1	['chr1: 147385106 ']	1
CHD1L	1	['chr1: 147385106 ']	1
BCL9	1	['chr1: 147385106 ']	1
ACP6	1	['chr1: 147385106 ']	1
GJA5	1	['chr1: 147385106 ']	1
GJA8	1	['chr1: 147385106 ']	1
GPR89B	1	['chr1: 147385106 ']	1
POPDC2	1	['chr3: 120004057 ']	1
COX17	1	['chr3: 120004057 ']	1
MAATS1	1	['chr3: 120004057 ']	1
NR1I2	1	['chr3: 120004057 ']	1
GSK3B	1	['chr3: 120004057 ']	1
GPR156	1	['chr3: 120004057 ']	1
LRRC58	1	['chr3: 120004057 ']	1
FSTL1	1	['chr3: 120004057 ']	1
NDUFB4	1	['chr3: 120004057 ']	1
HGD	1	['chr3: 120004057 ']	1
SERF1A	1	['chr5: 71533831 ']	1
SMN1	1	['chr5: 71533831 ']	1
NAIP	1	['chr5: 71533831 ']	1
GTF2H2	1	['chr5: 71533831 ']	1
BDP1	1	['chr5: 71533831 ']	1
MCCC2	1	['chr5: 71533831 ']	1
CARTPT	1	['chr5: 71533831 ']	1
MAP1B	1	['chr5: 71533831 ']	1
MRPS27	1	['chr5: 71533831 ']	1
PTCD2	1	['chr5: 71533831 ']	1
EPYC	1	['chr12: 92283942 ']	1
KERA	1	['chr12: 92283942 ']	1
LUM	1	['chr12: 92283942 ']	1
DCN	1	['chr12: 92283942 ']	1
BTG1	1	['chr12: 92283942 ']	1
CLLU1OS	1	['chr12: 92283942 ']	1
C12orf74	1	['chr12: 92283942 ']	1
PLEKHG7	1	['chr12: 92283942 ']	1
EEA1	1	['chr12: 92283942 ']	1
NUDT4	1	['chr12: 92283942 ']	1
RYBP	1	['chr3: 73290817']	1
SHQ1	1	['chr3: 73290817']	1
GXYLT2	1	['chr3: 73290817']	1
DCAF4L1	1	['chr4: 42786482']	1
SLC30A9	1	['chr4: 42786482']	1
BEND4	1	['chr4: 42786482']	1
SHISA3	1	['chr4: 42786482']	1
ATP8A1	1	['chr4: 42786482']	1
GRXCR1	1	['chr4: 42786482']	1
KCTD8	1	['chr4: 42786482']	1
YIPF7	1	['chr4: 42786482']	1
GUF1	1	['chr4: 42786482']	1
GNPDA2	1	['chr4: 42786482']	1
LACTB	1	['chr15: 62277150 ']	1
RPS27L	1	['chr15: 62277150 ']	1
RAB8B	1	['chr15: 62277150 ']	1
TMEM251	1	['chr14: 93040911 ']	1
AL110118.2	1	['chr14: 93040911 ']	1
GON7	1	['chr14: 93040911 ']	1
UBR7	1	['chr14: 93040911 ']	1
