# Supplementary material for: Circular synthesized CRISPR/Cas gRNAs for functional interrogations in the coding and noncoding genome
Source: eLife journal article supplement (doi:10.7554/elife.42549), 2019-03-06
Supplement: supp [file elife-42549-supp-v1.zip › elife_poa_e42549_Supplementary_File_14.xlsx]

## Sheet: Sheet1
Overlap Results
Collection(s):	C1, C2, C3, C4, C5, C6, C7, H
# overlaps shown:	10
# genesets in collections:	17810
# genes in comparison (n):	148
# genes in universe (N):	45956
Gene Set Name	# Genes in Gene Set (K)	Description	# Genes in Overlap (k)	k/K	p-value	FDR q-value
DACOSTA_UV_RESPONSE_VIA_ERCC3_DN	855	Genes down-regulated in fibroblasts expressing mutant forms of ERCC3 [GeneID=2071] after UV irradiation.	25	0.0292	6.11e-17	1.09e-12
GO_POSITIVE_REGULATION_OF_CATALYTIC_ACTIVITY	1518	Any process that activates or increases the activity of an enzyme.	29	0.0191	1.02e-14	8.95e-11
GO_POSITIVE_REGULATION_OF_MOLECULAR_FUNCTION	1791	Any process that activates or increases the rate or extent of a molecular function, an elemental biological activity occurring at the molecular level, such as catalysis or binding.	31	0.0173	1.51e-14	8.95e-11
AACTTT_UNKNOWN	1890	Genes having at least one occurence of the highly conserved motif M17 AACTTT in the region spanning up to 4 kb around their transcription start sites. The motif does not match any known transcription factor binding site (v7.4 TRANSFAC).	30	0.0159	3.93e-13	1.75e-09
GO_PHOSPHATE_CONTAINING_COMPOUND_METABOLIC_PROCESS	1977	The chemical reactions and pathways involving the phosphate group, the anion or salt of any phosphoric acid.	29	0.0147	7.01e-12	2.17e-08
GO_INTRACELLULAR_SIGNAL_TRANSDUCTION	1572	The process in which a signal is passed on to downstream components within the cell, which become activated themselves to further propagate the signal and finally trigger a change in the function or state of the cell.	26	0.0165	7.32e-12	2.17e-08
GO_ENZYME_BINDING	1737	Interacting selectively and non-covalently with any enzyme.	27	0.0155	1.13e-11	2.86e-08
GO_REGULATION_OF_PHOSPHORUS_METABOLIC_PROCESS	1618	Any process that modulates the frequency, rate or extent of the chemical reactions and pathways involving phosphorus or compounds containing phosphorus.	26	0.0161	1.38e-11	3.07e-08
GOBERT_OLIGODENDROCYTE_DIFFERENTIATION_DN	1080	Genes down-regulated during differentiation of Oli-Neu cells (oligodendroglial precursor) in response to PD174265 [PubChem=4709].	21	0.0194	5.07e-11	1e-07
DACOSTA_UV_RESPONSE_VIA_ERCC3_COMMON_DN	483	Common down-regulated transcripts in fibroblasts expressing either XP/CS or TDD mutant forms of ERCC3 [GeneID=2071], after UVC irradiation.	15	0.0311	6.24e-11	1.11e-07
Gene/Gene Set Overlap Matrix
Entrez Gene Id	Gene Symbol	Gene Description	DACOSTA_UV_RESPONSE_VIA_ERCC3_DN	GO_POSITIVE_REGULATION_OF_CATALYTIC_ACTIVITY	GO_POSITIVE_REGULATION_OF_MOLECULAR_FUNCTION	AACTTT_UNKNOWN	GO_PHOSPHATE_CONTAINING_COMPOUND_METABOLIC_PROCESS	GO_INTRACELLULAR_SIGNAL_TRANSDUCTION	GO_ENZYME_BINDING	GO_REGULATION_OF_PHOSPHORUS_METABOLIC_PROCESS	GOBERT_OLIGODENDROCYTE_DIFFERENTIATION_DN	DACOSTA_UV_RESPONSE_VIA_ERCC3_COMMON_DN
6788	STK3	serine/threonine kinase 3	DACOSTA_UV_RESPONSE_VIA_ERCC3_DN	GO_POSITIVE_REGULATION_OF_CATALYTIC_ACTIVITY	GO_POSITIVE_REGULATION_OF_MOLECULAR_FUNCTION	AACTTT_UNKNOWN	GO_PHOSPHATE_CONTAINING_COMPOUND_METABOLIC_PROCESS	GO_INTRACELLULAR_SIGNAL_TRANSDUCTION		GO_REGULATION_OF_PHOSPHORUS_METABOLIC_PROCESS		DACOSTA_UV_RESPONSE_VIA_ERCC3_COMMON_DN
23118	TAB2	TGF-beta activated kinase 1/MAP3K7 binding protein 2	DACOSTA_UV_RESPONSE_VIA_ERCC3_DN	GO_POSITIVE_REGULATION_OF_CATALYTIC_ACTIVITY	GO_POSITIVE_REGULATION_OF_MOLECULAR_FUNCTION	AACTTT_UNKNOWN	GO_PHOSPHATE_CONTAINING_COMPOUND_METABOLIC_PROCESS	GO_INTRACELLULAR_SIGNAL_TRANSDUCTION		GO_REGULATION_OF_PHOSPHORUS_METABOLIC_PROCESS		DACOSTA_UV_RESPONSE_VIA_ERCC3_COMMON_DN
9732	DOCK4	dedicator of cytokinesis 4	DACOSTA_UV_RESPONSE_VIA_ERCC3_DN	GO_POSITIVE_REGULATION_OF_CATALYTIC_ACTIVITY	GO_POSITIVE_REGULATION_OF_MOLECULAR_FUNCTION	AACTTT_UNKNOWN		GO_INTRACELLULAR_SIGNAL_TRANSDUCTION	GO_ENZYME_BINDING		GOBERT_OLIGODENDROCYTE_DIFFERENTIATION_DN
2932	GSK3B	glycogen synthase kinase 3 beta	DACOSTA_UV_RESPONSE_VIA_ERCC3_DN	GO_POSITIVE_REGULATION_OF_CATALYTIC_ACTIVITY	GO_POSITIVE_REGULATION_OF_MOLECULAR_FUNCTION		GO_PHOSPHATE_CONTAINING_COMPOUND_METABOLIC_PROCESS	GO_INTRACELLULAR_SIGNAL_TRANSDUCTION	GO_ENZYME_BINDING	GO_REGULATION_OF_PHOSPHORUS_METABOLIC_PROCESS	GOBERT_OLIGODENDROCYTE_DIFFERENTIATION_DN	DACOSTA_UV_RESPONSE_VIA_ERCC3_COMMON_DN
115	ADCY9	adenylate cyclase 9	DACOSTA_UV_RESPONSE_VIA_ERCC3_DN	GO_POSITIVE_REGULATION_OF_CATALYTIC_ACTIVITY	GO_POSITIVE_REGULATION_OF_MOLECULAR_FUNCTION		GO_PHOSPHATE_CONTAINING_COMPOUND_METABOLIC_PROCESS	GO_INTRACELLULAR_SIGNAL_TRANSDUCTION		GO_REGULATION_OF_PHOSPHORUS_METABOLIC_PROCESS	GOBERT_OLIGODENDROCYTE_DIFFERENTIATION_DN
23268	DNMBP	dynamin binding protein	DACOSTA_UV_RESPONSE_VIA_ERCC3_DN	GO_POSITIVE_REGULATION_OF_CATALYTIC_ACTIVITY	GO_POSITIVE_REGULATION_OF_MOLECULAR_FUNCTION			GO_INTRACELLULAR_SIGNAL_TRANSDUCTION				DACOSTA_UV_RESPONSE_VIA_ERCC3_COMMON_DN
1793	DOCK1	dedicator of cytokinesis 1	DACOSTA_UV_RESPONSE_VIA_ERCC3_DN	GO_POSITIVE_REGULATION_OF_CATALYTIC_ACTIVITY	GO_POSITIVE_REGULATION_OF_MOLECULAR_FUNCTION			GO_INTRACELLULAR_SIGNAL_TRANSDUCTION
8853	ASAP2	ArfGAP with SH3 domain, ankyrin repeat and PH domain 2	DACOSTA_UV_RESPONSE_VIA_ERCC3_DN	GO_POSITIVE_REGULATION_OF_CATALYTIC_ACTIVITY	GO_POSITIVE_REGULATION_OF_MOLECULAR_FUNCTION							DACOSTA_UV_RESPONSE_VIA_ERCC3_COMMON_DN
6196	RPS6KA2	ribosomal protein S6 kinase, 90kDa, polypeptide 2	DACOSTA_UV_RESPONSE_VIA_ERCC3_DN			AACTTT_UNKNOWN	GO_PHOSPHATE_CONTAINING_COMPOUND_METABOLIC_PROCESS	GO_INTRACELLULAR_SIGNAL_TRANSDUCTION
5523	PPP2R3A	protein phosphatase 2, regulatory subunit B'', alpha	DACOSTA_UV_RESPONSE_VIA_ERCC3_DN			AACTTT_UNKNOWN	GO_PHOSPHATE_CONTAINING_COMPOUND_METABOLIC_PROCESS			GO_REGULATION_OF_PHOSPHORUS_METABOLIC_PROCESS		DACOSTA_UV_RESPONSE_VIA_ERCC3_COMMON_DN
2122	MECOM	MDS1 and EVI1 complex locus	DACOSTA_UV_RESPONSE_VIA_ERCC3_DN			AACTTT_UNKNOWN				GO_REGULATION_OF_PHOSPHORUS_METABOLIC_PROCESS
9456	HOMER1	homer homolog 1 (Drosophila)	DACOSTA_UV_RESPONSE_VIA_ERCC3_DN			AACTTT_UNKNOWN					GOBERT_OLIGODENDROCYTE_DIFFERENTIATION_DN	DACOSTA_UV_RESPONSE_VIA_ERCC3_COMMON_DN
23301	EHBP1	EH domain binding protein 1	DACOSTA_UV_RESPONSE_VIA_ERCC3_DN			AACTTT_UNKNOWN					GOBERT_OLIGODENDROCYTE_DIFFERENTIATION_DN	DACOSTA_UV_RESPONSE_VIA_ERCC3_COMMON_DN
10090	UST	uronyl-2-sulfotransferase	DACOSTA_UV_RESPONSE_VIA_ERCC3_DN			AACTTT_UNKNOWN					GOBERT_OLIGODENDROCYTE_DIFFERENTIATION_DN
89795	NAV3	neuron navigator 3	DACOSTA_UV_RESPONSE_VIA_ERCC3_DN			AACTTT_UNKNOWN					GOBERT_OLIGODENDROCYTE_DIFFERENTIATION_DN
10427	SEC24B	SEC24 family, member B (S. cerevisiae)	DACOSTA_UV_RESPONSE_VIA_ERCC3_DN			AACTTT_UNKNOWN						DACOSTA_UV_RESPONSE_VIA_ERCC3_COMMON_DN
1112	FOXN3	forkhead box N3	DACOSTA_UV_RESPONSE_VIA_ERCC3_DN			AACTTT_UNKNOWN						DACOSTA_UV_RESPONSE_VIA_ERCC3_COMMON_DN
5151	PDE8A	phosphodiesterase 8A	DACOSTA_UV_RESPONSE_VIA_ERCC3_DN				GO_PHOSPHATE_CONTAINING_COMPOUND_METABOLIC_PROCESS					DACOSTA_UV_RESPONSE_VIA_ERCC3_COMMON_DN
259230	SGMS1	sphingomyelin synthase 1	DACOSTA_UV_RESPONSE_VIA_ERCC3_DN				GO_PHOSPHATE_CONTAINING_COMPOUND_METABOLIC_PROCESS
23286	WWC1	WW and C2 domain containing 1	DACOSTA_UV_RESPONSE_VIA_ERCC3_DN					GO_INTRACELLULAR_SIGNAL_TRANSDUCTION	GO_ENZYME_BINDING	GO_REGULATION_OF_PHOSPHORUS_METABOLIC_PROCESS		DACOSTA_UV_RESPONSE_VIA_ERCC3_COMMON_DN
3949	LDLR	low density lipoprotein receptor	DACOSTA_UV_RESPONSE_VIA_ERCC3_DN						GO_ENZYME_BINDING	GO_REGULATION_OF_PHOSPHORUS_METABOLIC_PROCESS		DACOSTA_UV_RESPONSE_VIA_ERCC3_COMMON_DN
667	DST	dystonin	DACOSTA_UV_RESPONSE_VIA_ERCC3_DN								GOBERT_OLIGODENDROCYTE_DIFFERENTIATION_DN	DACOSTA_UV_RESPONSE_VIA_ERCC3_COMMON_DN
9194	SLC16A7	solute carrier family 16, member 7 (monocarboxylic acid transporter 2)	DACOSTA_UV_RESPONSE_VIA_ERCC3_DN								GOBERT_OLIGODENDROCYTE_DIFFERENTIATION_DN
22878	TRAPPC8	trafficking protein particle complex 8	DACOSTA_UV_RESPONSE_VIA_ERCC3_DN									DACOSTA_UV_RESPONSE_VIA_ERCC3_COMMON_DN
9469	CHST3	carbohydrate (chondroitin 6) sulfotransferase 3	DACOSTA_UV_RESPONSE_VIA_ERCC3_DN
25	ABL1	c-abl oncogene 1, non-receptor tyrosine kinase		GO_POSITIVE_REGULATION_OF_CATALYTIC_ACTIVITY	GO_POSITIVE_REGULATION_OF_MOLECULAR_FUNCTION	AACTTT_UNKNOWN	GO_PHOSPHATE_CONTAINING_COMPOUND_METABOLIC_PROCESS	GO_INTRACELLULAR_SIGNAL_TRANSDUCTION	GO_ENZYME_BINDING	GO_REGULATION_OF_PHOSPHORUS_METABOLIC_PROCESS
5608	MAP2K6	mitogen-activated protein kinase kinase 6		GO_POSITIVE_REGULATION_OF_CATALYTIC_ACTIVITY	GO_POSITIVE_REGULATION_OF_MOLECULAR_FUNCTION	AACTTT_UNKNOWN	GO_PHOSPHATE_CONTAINING_COMPOUND_METABOLIC_PROCESS	GO_INTRACELLULAR_SIGNAL_TRANSDUCTION	GO_ENZYME_BINDING	GO_REGULATION_OF_PHOSPHORUS_METABOLIC_PROCESS
143471	PSMA8	proteasome (prosome, macropain) subunit, alpha type, 8		GO_POSITIVE_REGULATION_OF_CATALYTIC_ACTIVITY	GO_POSITIVE_REGULATION_OF_MOLECULAR_FUNCTION	AACTTT_UNKNOWN	GO_PHOSPHATE_CONTAINING_COMPOUND_METABOLIC_PROCESS	GO_INTRACELLULAR_SIGNAL_TRANSDUCTION
2911	GRM1	glutamate receptor, metabotropic 1		GO_POSITIVE_REGULATION_OF_CATALYTIC_ACTIVITY	GO_POSITIVE_REGULATION_OF_MOLECULAR_FUNCTION	AACTTT_UNKNOWN				GO_REGULATION_OF_PHOSPHORUS_METABOLIC_PROCESS
2185	PTK2B	PTK2B protein tyrosine kinase 2 beta		GO_POSITIVE_REGULATION_OF_CATALYTIC_ACTIVITY	GO_POSITIVE_REGULATION_OF_MOLECULAR_FUNCTION		GO_PHOSPHATE_CONTAINING_COMPOUND_METABOLIC_PROCESS	GO_INTRACELLULAR_SIGNAL_TRANSDUCTION	GO_ENZYME_BINDING	GO_REGULATION_OF_PHOSPHORUS_METABOLIC_PROCESS
5581	PRKCE	protein kinase C, epsilon		GO_POSITIVE_REGULATION_OF_CATALYTIC_ACTIVITY	GO_POSITIVE_REGULATION_OF_MOLECULAR_FUNCTION		GO_PHOSPHATE_CONTAINING_COMPOUND_METABOLIC_PROCESS	GO_INTRACELLULAR_SIGNAL_TRANSDUCTION	GO_ENZYME_BINDING	GO_REGULATION_OF_PHOSPHORUS_METABOLIC_PROCESS
6711	SPTBN1	spectrin, beta, non-erythrocytic 1		GO_POSITIVE_REGULATION_OF_CATALYTIC_ACTIVITY	GO_POSITIVE_REGULATION_OF_MOLECULAR_FUNCTION		GO_PHOSPHATE_CONTAINING_COMPOUND_METABOLIC_PROCESS	GO_INTRACELLULAR_SIGNAL_TRANSDUCTION	GO_ENZYME_BINDING		GOBERT_OLIGODENDROCYTE_DIFFERENTIATION_DN
7867	MAPKAPK3	mitogen-activated protein kinase-activated protein kinase 3		GO_POSITIVE_REGULATION_OF_CATALYTIC_ACTIVITY	GO_POSITIVE_REGULATION_OF_MOLECULAR_FUNCTION		GO_PHOSPHATE_CONTAINING_COMPOUND_METABOLIC_PROCESS	GO_INTRACELLULAR_SIGNAL_TRANSDUCTION		GO_REGULATION_OF_PHOSPHORUS_METABOLIC_PROCESS
3563	IL3RA	interleukin 3 receptor, alpha (low affinity)		GO_POSITIVE_REGULATION_OF_CATALYTIC_ACTIVITY	GO_POSITIVE_REGULATION_OF_MOLECULAR_FUNCTION		GO_PHOSPHATE_CONTAINING_COMPOUND_METABOLIC_PROCESS	GO_INTRACELLULAR_SIGNAL_TRANSDUCTION
3643	INSR	insulin receptor		GO_POSITIVE_REGULATION_OF_CATALYTIC_ACTIVITY	GO_POSITIVE_REGULATION_OF_MOLECULAR_FUNCTION		GO_PHOSPHATE_CONTAINING_COMPOUND_METABOLIC_PROCESS		GO_ENZYME_BINDING	GO_REGULATION_OF_PHOSPHORUS_METABOLIC_PROCESS
9472	AKAP6	A kinase (PRKA) anchor protein 6		GO_POSITIVE_REGULATION_OF_CATALYTIC_ACTIVITY	GO_POSITIVE_REGULATION_OF_MOLECULAR_FUNCTION			GO_INTRACELLULAR_SIGNAL_TRANSDUCTION	GO_ENZYME_BINDING	GO_REGULATION_OF_PHOSPHORUS_METABOLIC_PROCESS
554	AVPR2	arginine vasopressin receptor 2		GO_POSITIVE_REGULATION_OF_CATALYTIC_ACTIVITY	GO_POSITIVE_REGULATION_OF_MOLECULAR_FUNCTION			GO_INTRACELLULAR_SIGNAL_TRANSDUCTION		GO_REGULATION_OF_PHOSPHORUS_METABOLIC_PROCESS
444	ASPH	aspartate beta-hydroxylase		GO_POSITIVE_REGULATION_OF_CATALYTIC_ACTIVITY	GO_POSITIVE_REGULATION_OF_MOLECULAR_FUNCTION			GO_INTRACELLULAR_SIGNAL_TRANSDUCTION
8787	RGS9	regulator of G-protein signaling 9		GO_POSITIVE_REGULATION_OF_CATALYTIC_ACTIVITY	GO_POSITIVE_REGULATION_OF_MOLECULAR_FUNCTION			GO_INTRACELLULAR_SIGNAL_TRANSDUCTION
3688	ITGB1	integrin, beta 1 (fibronectin receptor, beta polypeptide, antigen CD29 includes MDF2, MSK12)		GO_POSITIVE_REGULATION_OF_CATALYTIC_ACTIVITY	GO_POSITIVE_REGULATION_OF_MOLECULAR_FUNCTION				GO_ENZYME_BINDING	GO_REGULATION_OF_PHOSPHORUS_METABOLIC_PROCESS
9712	USP6NL	USP6 N-terminal like		GO_POSITIVE_REGULATION_OF_CATALYTIC_ACTIVITY	GO_POSITIVE_REGULATION_OF_MOLECULAR_FUNCTION				GO_ENZYME_BINDING		GOBERT_OLIGODENDROCYTE_DIFFERENTIATION_DN
79890	RIN3	Ras and Rab interactor 3		GO_POSITIVE_REGULATION_OF_CATALYTIC_ACTIVITY	GO_POSITIVE_REGULATION_OF_MOLECULAR_FUNCTION				GO_ENZYME_BINDING
7039	TGFA	transforming growth factor, alpha		GO_POSITIVE_REGULATION_OF_CATALYTIC_ACTIVITY	GO_POSITIVE_REGULATION_OF_MOLECULAR_FUNCTION					GO_REGULATION_OF_PHOSPHORUS_METABOLIC_PROCESS
57480	PLEKHG1	pleckstrin homology domain containing, family G (with RhoGef domain) member 1		GO_POSITIVE_REGULATION_OF_CATALYTIC_ACTIVITY	GO_POSITIVE_REGULATION_OF_MOLECULAR_FUNCTION						GOBERT_OLIGODENDROCYTE_DIFFERENTIATION_DN
6091	ROBO1	roundabout, axon guidance receptor, homolog 1 (Drosophila)		GO_POSITIVE_REGULATION_OF_CATALYTIC_ACTIVITY	GO_POSITIVE_REGULATION_OF_MOLECULAR_FUNCTION
23092	ARHGAP26	Rho GTPase activating protein 26		GO_POSITIVE_REGULATION_OF_CATALYTIC_ACTIVITY	GO_POSITIVE_REGULATION_OF_MOLECULAR_FUNCTION
783	CACNB2	calcium channel, voltage-dependent, beta 2 subunit			GO_POSITIVE_REGULATION_OF_MOLECULAR_FUNCTION	AACTTT_UNKNOWN			GO_ENZYME_BINDING
6597	SMARCA4	SWI/SNF related, matrix associated, actin dependent regulator of chromatin, subfamily a, member 4			GO_POSITIVE_REGULATION_OF_MOLECULAR_FUNCTION				GO_ENZYME_BINDING
2047	EPHB1	EPH receptor B1				AACTTT_UNKNOWN	GO_PHOSPHATE_CONTAINING_COMPOUND_METABOLIC_PROCESS			GO_REGULATION_OF_PHOSPHORUS_METABOLIC_PROCESS
57105	CYSLTR2	cysteinyl leukotriene receptor 2				AACTTT_UNKNOWN				GO_REGULATION_OF_PHOSPHORUS_METABOLIC_PROCESS
80031	SEMA6D	sema domain, transmembrane domain (TM), and cytoplasmic domain, (semaphorin) 6D				AACTTT_UNKNOWN					GOBERT_OLIGODENDROCYTE_DIFFERENTIATION_DN
220965	FAM13C	family with sequence similarity 13, member C				AACTTT_UNKNOWN					GOBERT_OLIGODENDROCYTE_DIFFERENTIATION_DN
26053	AUTS2	autism susceptibility candidate 2				AACTTT_UNKNOWN
7545	ZIC1	Zic family member 1				AACTTT_UNKNOWN
54212	SNTG1	syntrophin, gamma 1				AACTTT_UNKNOWN
55809	TRERF1	transcriptional regulating factor 1				AACTTT_UNKNOWN
2104	ESRRG	estrogen-related receptor gamma				AACTTT_UNKNOWN
63976	PRDM16	PR domain containing 16				AACTTT_UNKNOWN
10335	MRVI1	murine retrovirus integration site 1 homolog				AACTTT_UNKNOWN
10085	EDIL3	EGF-like repeats and discoidin I-like domains 3				AACTTT_UNKNOWN
50863	NTM	neurotrimin				AACTTT_UNKNOWN
2272	FHIT	fragile histidine triad gene					GO_PHOSPHATE_CONTAINING_COMPOUND_METABOLIC_PROCESS	GO_INTRACELLULAR_SIGNAL_TRANSDUCTION	GO_ENZYME_BINDING
23007	PLCH1	phospholipase C, eta 1					GO_PHOSPHATE_CONTAINING_COMPOUND_METABOLIC_PROCESS	GO_INTRACELLULAR_SIGNAL_TRANSDUCTION
23545	ATP6V0A2	ATPase, H+ transporting, lysosomal V0 subunit a2					GO_PHOSPHATE_CONTAINING_COMPOUND_METABOLIC_PROCESS		GO_ENZYME_BINDING		GOBERT_OLIGODENDROCYTE_DIFFERENTIATION_DN
2042	EPHA3	EPH receptor A3					GO_PHOSPHATE_CONTAINING_COMPOUND_METABOLIC_PROCESS
3099	HK2	hexokinase 2					GO_PHOSPHATE_CONTAINING_COMPOUND_METABOLIC_PROCESS
9829	DNAJC6	DnaJ (Hsp40) homolog, subfamily C, member 6					GO_PHOSPHATE_CONTAINING_COMPOUND_METABOLIC_PROCESS
8622	PDE8B	phosphodiesterase 8B					GO_PHOSPHATE_CONTAINING_COMPOUND_METABOLIC_PROCESS
3705	ITPK1	inositol-tetrakisphosphate 1-kinase					GO_PHOSPHATE_CONTAINING_COMPOUND_METABOLIC_PROCESS
132	ADK	adenosine kinase					GO_PHOSPHATE_CONTAINING_COMPOUND_METABOLIC_PROCESS
5379	PMS2P1	postmeiotic segregation increased 2 pseudogene 1					GO_PHOSPHATE_CONTAINING_COMPOUND_METABOLIC_PROCESS
57460	PPM1H	protein phosphatase, Mg2+/Mn2+ dependent, 1H					GO_PHOSPHATE_CONTAINING_COMPOUND_METABOLIC_PROCESS
2691	GHRH	growth hormone releasing hormone						GO_INTRACELLULAR_SIGNAL_TRANSDUCTION		GO_REGULATION_OF_PHOSPHORUS_METABOLIC_PROCESS
775	CACNA1C	calcium channel, voltage-dependent, L type, alpha 1C subunit						GO_INTRACELLULAR_SIGNAL_TRANSDUCTION
54622	ARL15	ADP-ribosylation factor-like 15						GO_INTRACELLULAR_SIGNAL_TRANSDUCTION
9555	H2AFY	H2A histone family, member Y							GO_ENZYME_BINDING	GO_REGULATION_OF_PHOSPHORUS_METABOLIC_PROCESS
1994	ELAVL1	ELAV (embryonic lethal, abnormal vision, Drosophila)-like 1 (Hu antigen R)							GO_ENZYME_BINDING		GOBERT_OLIGODENDROCYTE_DIFFERENTIATION_DN
23523	CABIN1	calcineurin binding protein 1							GO_ENZYME_BINDING		GOBERT_OLIGODENDROCYTE_DIFFERENTIATION_DN
54467	ANKIB1	ankyrin repeat and IBR domain containing 1							GO_ENZYME_BINDING
6531	SLC6A3	solute carrier family 6 (neurotransmitter transporter, dopamine), member 3							GO_ENZYME_BINDING
9482	STX8	syntaxin 8							GO_ENZYME_BINDING
9659	PDE4DIP	phosphodiesterase 4D interacting protein							GO_ENZYME_BINDING
55666	NPLOC4	nuclear protein localization 4 homolog (S. cerevisiae)							GO_ENZYME_BINDING
54517	PUS7	pseudouridylate synthase 7 homolog (S. cerevisiae)							GO_ENZYME_BINDING
1826	DSCAM	Down syndrome cell adhesion molecule								GO_REGULATION_OF_PHOSPHORUS_METABOLIC_PROCESS	GOBERT_OLIGODENDROCYTE_DIFFERENTIATION_DN
344901	OSTN	osteocrin								GO_REGULATION_OF_PHOSPHORUS_METABOLIC_PROCESS
197	AHSG	alpha-2-HS-glycoprotein								GO_REGULATION_OF_PHOSPHORUS_METABOLIC_PROCESS
169792	GLIS3	GLIS family zinc finger 3									GOBERT_OLIGODENDROCYTE_DIFFERENTIATION_DN
22891	ZNF365	zinc finger protein 365									GOBERT_OLIGODENDROCYTE_DIFFERENTIATION_DN
118429	ANTXR2	anthrax toxin receptor 2									GOBERT_OLIGODENDROCYTE_DIFFERENTIATION_DN
8448	DOC2A	double C2-like domains, alpha
2348	FOLR1	folate receptor 1 (adult)
9229	DLGAP1	discs, large (Drosophila) homolog-associated protein 1
113235	SLC46A1	solute carrier family 46 (folate transporter), member 1
56302	TRPV5	transient receptor potential cation channel, subfamily V, member 5
27152	INTU	inturned planar cell polarity effector homolog (Drosophila)
25834	MGAT4C	mannosyl (alpha-1,3-)-glycoprotein beta-1,4-N-acetylglucosaminyltransferase, isozyme C (putative)
2802	GOLGA3	golgin A3
23315	SLC9A8	solute carrier family 9 (sodium/hydrogen exchanger), member 8
2635	GBP3	guanylate binding protein 3
442117	GALNTL6	UDP-N-acetyl-alpha-D-galactosamine:polypeptide N-acetylgalactosaminyltransferase-like 6
3909	LAMA3	laminin, alpha 3
165829	GPR156	G protein-coupled receptor 156
55576	STAB2	stabilin 2
9749	PHACTR2	phosphatase and actin regulator 2
5427	POLE2	polymerase (DNA directed), epsilon 2 (p59 subunit)
8854	ALDH1A2	aldehyde dehydrogenase 1 family, member A2
2200	FBN1	fibrillin 1
3663	IRF5	interferon regulatory factor 5
146713	RBFOX3	RNA binding protein, fox-1 homolog (C. elegans) 3
9937	DCLRE1A	DNA cross-link repair 1A
3988	LIPA	lipase A, lysosomal acid, cholesterol esterase
1207	CLNS1A	chloride channel, nucleotide-sensitive, 1A
8701	DNAH11	dynein, axonemal, heavy chain 11
3619	INCENP	inner centromere protein antigens 135/155kDa
22955	SCMH1	sex comb on midleg homolog 1 (Drosophila)
222484	LNX2	ligand of numb-protein X 2
25862	USP49	ubiquitin specific peptidase 49
10003	NAALAD2	N-acetylated alpha-linked acidic dipeptidase 2
84105	PCBD2	pterin-4 alpha-carbinolamine dehydratase/dimerization cofactor of hepatocyte nuclear factor 1 alpha (TCF1) 2
9118	INA	internexin neuronal intermediate filament protein, alpha
23143	LRCH1	leucine-rich repeats and calponin homology (CH) domain containing 1
64405	CDH22	cadherin 22, type 2
80831	APOL5	apolipoprotein L, 5
259217	HSPA12A	heat shock 70kDa protein 12A
9777	TM9SF4	transmembrane 9 superfamily protein member 4
10873	ME3	malic enzyme 3, NADP(+)-dependent, mitochondrial
2178	FANCE	Fanconi anemia, complementation group E
81569	ACTL8	actin-like 8
6315	ATXN8OS	ATXN8 opposite strand (non-protein coding)
2175	FANCA	Fanconi anemia, complementation group A
64965	MRPS9	mitochondrial ribosomal protein S9
55814	BDP1	B double prime 1, subunit of RNA polymerase III transcription initiation factor IIIB
27085	MTBP	Mdm2, transformed 3T3 cell double minute 2, p53 binding protein (mouse) binding protein, 104kDa
90665	TBL1Y	transducin (beta)-like 1, Y-linked
114991	ZNF618	zinc finger protein 618
353091	RAET1G	retinoic acid early transcript 1G
22981	NINL	ninein-like
114792	KLHL32	kelch-like 32 (Drosophila)
157753	TMEM74	transmembrane protein 74
11085	ADAM30	ADAM metallopeptidase domain 30
758	MPPED1	metallophosphoesterase domain containing 1
84255	SLC37A3	solute carrier family 37 (glycerol-3-phosphate transporter), member 3
54439	RBM27	RNA binding motif protein 27
55734	ZFP64	zinc finger protein 64 homolog (mouse)
150350	ENTHD1	ENTH domain containing 1
60686	C14orf93	chromosome 14 open reading frame 93
51427	ZNF107	zinc finger protein 107
