# Supplementary material for: Circular synthesized CRISPR/Cas gRNAs for functional interrogations in the coding and noncoding genome
Source: eLife journal article supplement (doi:10.7554/elife.42549), 2019-03-06
Supplement: supp [file elife-42549-supp-v1.zip › elife_poa_e42549_Supplementary_File_15.xlsx]

## Sheet: overlap
Overlap Results
Collection(s):	C1, C2, C3, C4, C5, C6, C7, H
# overlaps shown:	10
# genesets in collections:	17810
# genes in comparison (n):	168
# genes in universe (N):	45956
Gene Set Name	# Genes in Gene Set (K)	Description	# Genes in Overlap (k)	k/K	p-value	FDR q-value
GO_POSITIVE_REGULATION_OF_BIOSYNTHETIC_PROCESS	1805	Any process that activates or increases the frequency, rate or extent of the chemical reactions and pathways resulting in the formation of substances.	33	0.0183	1.91E-14	3.41E-10
AACTTT_UNKNOWN	1890	Genes having at least one occurence of the highly conserved motif M17 AACTTT in the region spanning up to 4 kb around their transcription start sites. The motif does not match any known transcription factor binding site (v7.4 TRANSFAC).	33	0.0175	6.89E-14	6.14E-10
GO_TISSUE_DEVELOPMENT	1518	The process whose specific outcome is the progression of a tissue over time, from its formation to the mature structure.	29	0.0191	3.08E-13	1.83E-9
GO_REGULATION_OF_PHOSPHORUS_METABOLIC_PROCESS	1618	Any process that modulates the frequency, rate or extent of the chemical reactions and pathways involving phosphorus or compounds containing phosphorus.	29	0.0179	1.48E-12	6.57E-9
TTGTTT_FOXO4_01	2061	Genes having at least one occurence of the highly conserved motif M60 TTGTTT sites. The motif matches transcription factor binding site V$FOXO4_01 (v7.4 TRANSFAC).	32	0.0155	3.91E-12	1.39E-8
GO_POSITIVE_REGULATION_OF_RESPONSE_TO_STIMULUS	1929	Any process that activates, maintains or increases the rate of a response to a stimulus. Response to stimulus is a change in state or activity of a cell or an organism (in terms of movement, secretion, enzyme production, gene expression, etc.) as a result of a stimulus.	30	0.0156	1.96E-11	5.81E-8
GO_RESPONSE_TO_ORGANIC_CYCLIC_COMPOUND	917	Any process that results in a change in state or activity of a cell or an organism (in terms of movement, secretion, enzyme production, gene expression, etc.) as a result of an organic cyclic compound stimulus.	21	0.0229	2.89E-11	7.36E-8
GO_POSITIVE_REGULATION_OF_GENE_EXPRESSION	1733	Any process that increases the frequency, rate or extent of gene expression. Gene expression is the process in which a gene's coding sequence is converted into a mature gene product or products (proteins or RNA). This includes the production of an RNA transcript as well as any processing to produce a mature RNA product or an mRNA (for protein-coding genes) and the translation of that mRNA into pr…	28	0.0162	4.2E-11	9.36E-8
GO_POSITIVE_REGULATION_OF_PHOSPHORUS_METABOLIC_PROCESS	1036	Any process that increases the frequency, rate or extent of the chemical reactions and pathways involving phosphorus or compounds containing phosphorus.	21	0.0203	2.66E-10	5.06E-7
GO_RESPONSE_TO_OXYGEN_CONTAINING_COMPOUND	1381	Any process that results in a change in state or activity of a cell or an organism (in terms of movement, secretion, enzyme production, gene expression, etc.) as a result of an oxygen-containing compound stimulus.	24	0.0174	2.84E-10	5.06E-7
Gene/Gene Set Overlap Matrix
Entrez Gene Id	Gene Symbol	Gene Description	GO_POSITIVE_REGULATION_OF_BIOSYNTHETIC_PROCESS	AACTTT_UNKNOWN	GO_TISSUE_DEVELOPMENT	GO_REGULATION_OF_PHOSPHORUS_METABOLIC_PROCESS	TTGTTT_FOXO4_01	GO_POSITIVE_REGULATION_OF_RESPONSE_TO_STIMULUS	GO_RESPONSE_TO_ORGANIC_CYCLIC_COMPOUND	GO_POSITIVE_REGULATION_OF_GENE_EXPRESSION	GO_POSITIVE_REGULATION_OF_PHOSPHORUS_METABOLIC_PROCESS	GO_RESPONSE_TO_OXYGEN_CONTAINING_COMPOUND
2066	ERBB4	v-erb-a erythroblastic leukemia viral oncogene homolog 4 (avian)	GO_POSITIVE_REGULATION_OF_BIOSYNTHETIC_PROCESS	AACTTT_UNKNOWN	GO_TISSUE_DEVELOPMENT	GO_REGULATION_OF_PHOSPHORUS_METABOLIC_PROCESS	TTGTTT_FOXO4_01	GO_POSITIVE_REGULATION_OF_RESPONSE_TO_STIMULUS		GO_POSITIVE_REGULATION_OF_GENE_EXPRESSION	GO_POSITIVE_REGULATION_OF_PHOSPHORUS_METABOLIC_PROCESS
467	ATF3	activating transcription factor 3	GO_POSITIVE_REGULATION_OF_BIOSYNTHETIC_PROCESS	AACTTT_UNKNOWN	GO_TISSUE_DEVELOPMENT	GO_REGULATION_OF_PHOSPHORUS_METABOLIC_PROCESS		GO_POSITIVE_REGULATION_OF_RESPONSE_TO_STIMULUS		GO_POSITIVE_REGULATION_OF_GENE_EXPRESSION
6096	RORB	RAR-related orphan receptor B	GO_POSITIVE_REGULATION_OF_BIOSYNTHETIC_PROCESS	AACTTT_UNKNOWN	GO_TISSUE_DEVELOPMENT		TTGTTT_FOXO4_01		GO_RESPONSE_TO_ORGANIC_CYCLIC_COMPOUND	GO_POSITIVE_REGULATION_OF_GENE_EXPRESSION		GO_RESPONSE_TO_OXYGEN_CONTAINING_COMPOUND
5087	PBX1	pre-B-cell leukemia homeobox 1	GO_POSITIVE_REGULATION_OF_BIOSYNTHETIC_PROCESS	AACTTT_UNKNOWN	GO_TISSUE_DEVELOPMENT		TTGTTT_FOXO4_01			GO_POSITIVE_REGULATION_OF_GENE_EXPRESSION
64641	EBF2	early B-cell factor 2	GO_POSITIVE_REGULATION_OF_BIOSYNTHETIC_PROCESS	AACTTT_UNKNOWN	GO_TISSUE_DEVELOPMENT		TTGTTT_FOXO4_01			GO_POSITIVE_REGULATION_OF_GENE_EXPRESSION
26298	EHF	ets homologous factor	GO_POSITIVE_REGULATION_OF_BIOSYNTHETIC_PROCESS	AACTTT_UNKNOWN	GO_TISSUE_DEVELOPMENT		TTGTTT_FOXO4_01			GO_POSITIVE_REGULATION_OF_GENE_EXPRESSION
257397	TAB3	TGF-beta activated kinase 1/MAP3K7 binding protein 3	GO_POSITIVE_REGULATION_OF_BIOSYNTHETIC_PROCESS	AACTTT_UNKNOWN		GO_REGULATION_OF_PHOSPHORUS_METABOLIC_PROCESS		GO_POSITIVE_REGULATION_OF_RESPONSE_TO_STIMULUS		GO_POSITIVE_REGULATION_OF_GENE_EXPRESSION	GO_POSITIVE_REGULATION_OF_PHOSPHORUS_METABOLIC_PROCESS
6239	RREB1	ras responsive element binding protein 1	GO_POSITIVE_REGULATION_OF_BIOSYNTHETIC_PROCESS	AACTTT_UNKNOWN			TTGTTT_FOXO4_01	GO_POSITIVE_REGULATION_OF_RESPONSE_TO_STIMULUS		GO_POSITIVE_REGULATION_OF_GENE_EXPRESSION
6095	RORA	RAR-related orphan receptor A	GO_POSITIVE_REGULATION_OF_BIOSYNTHETIC_PROCESS	AACTTT_UNKNOWN			TTGTTT_FOXO4_01		GO_RESPONSE_TO_ORGANIC_CYCLIC_COMPOUND	GO_POSITIVE_REGULATION_OF_GENE_EXPRESSION		GO_RESPONSE_TO_OXYGEN_CONTAINING_COMPOUND
57492	ARID1B	AT rich interactive domain 1B (SWI1-like)	GO_POSITIVE_REGULATION_OF_BIOSYNTHETIC_PROCESS	AACTTT_UNKNOWN			TTGTTT_FOXO4_01			GO_POSITIVE_REGULATION_OF_GENE_EXPRESSION
4009	LMX1A	LIM homeobox transcription factor 1, alpha	GO_POSITIVE_REGULATION_OF_BIOSYNTHETIC_PROCESS	AACTTT_UNKNOWN						GO_POSITIVE_REGULATION_OF_GENE_EXPRESSION
8543	LMO4	LIM domain only 4	GO_POSITIVE_REGULATION_OF_BIOSYNTHETIC_PROCESS		GO_TISSUE_DEVELOPMENT	GO_REGULATION_OF_PHOSPHORUS_METABOLIC_PROCESS	TTGTTT_FOXO4_01			GO_POSITIVE_REGULATION_OF_GENE_EXPRESSION	GO_POSITIVE_REGULATION_OF_PHOSPHORUS_METABOLIC_PROCESS
7046	TGFBR1	transforming growth factor, beta receptor 1	GO_POSITIVE_REGULATION_OF_BIOSYNTHETIC_PROCESS		GO_TISSUE_DEVELOPMENT	GO_REGULATION_OF_PHOSPHORUS_METABOLIC_PROCESS		GO_POSITIVE_REGULATION_OF_RESPONSE_TO_STIMULUS	GO_RESPONSE_TO_ORGANIC_CYCLIC_COMPOUND	GO_POSITIVE_REGULATION_OF_GENE_EXPRESSION	GO_POSITIVE_REGULATION_OF_PHOSPHORUS_METABOLIC_PROCESS	GO_RESPONSE_TO_OXYGEN_CONTAINING_COMPOUND
1909	EDNRA	endothelin receptor type A	GO_POSITIVE_REGULATION_OF_BIOSYNTHETIC_PROCESS		GO_TISSUE_DEVELOPMENT	GO_REGULATION_OF_PHOSPHORUS_METABOLIC_PROCESS		GO_POSITIVE_REGULATION_OF_RESPONSE_TO_STIMULUS	GO_RESPONSE_TO_ORGANIC_CYCLIC_COMPOUND		GO_POSITIVE_REGULATION_OF_PHOSPHORUS_METABOLIC_PROCESS	GO_RESPONSE_TO_OXYGEN_CONTAINING_COMPOUND
60401	EDA2R	ectodysplasin A2 receptor	GO_POSITIVE_REGULATION_OF_BIOSYNTHETIC_PROCESS		GO_TISSUE_DEVELOPMENT	GO_REGULATION_OF_PHOSPHORUS_METABOLIC_PROCESS		GO_POSITIVE_REGULATION_OF_RESPONSE_TO_STIMULUS		GO_POSITIVE_REGULATION_OF_GENE_EXPRESSION	GO_POSITIVE_REGULATION_OF_PHOSPHORUS_METABOLIC_PROCESS
4880	NPPC	natriuretic peptide C	GO_POSITIVE_REGULATION_OF_BIOSYNTHETIC_PROCESS		GO_TISSUE_DEVELOPMENT	GO_REGULATION_OF_PHOSPHORUS_METABOLIC_PROCESS					GO_POSITIVE_REGULATION_OF_PHOSPHORUS_METABOLIC_PROCESS	GO_RESPONSE_TO_OXYGEN_CONTAINING_COMPOUND
301	ANXA1	annexin A1	GO_POSITIVE_REGULATION_OF_BIOSYNTHETIC_PROCESS		GO_TISSUE_DEVELOPMENT		TTGTTT_FOXO4_01	GO_POSITIVE_REGULATION_OF_RESPONSE_TO_STIMULUS	GO_RESPONSE_TO_ORGANIC_CYCLIC_COMPOUND			GO_RESPONSE_TO_OXYGEN_CONTAINING_COMPOUND
112744	IL17F	interleukin 17F	GO_POSITIVE_REGULATION_OF_BIOSYNTHETIC_PROCESS		GO_TISSUE_DEVELOPMENT			GO_POSITIVE_REGULATION_OF_RESPONSE_TO_STIMULUS		GO_POSITIVE_REGULATION_OF_GENE_EXPRESSION
1051	CEBPB	CCAAT/enhancer binding protein (C/EBP), beta	GO_POSITIVE_REGULATION_OF_BIOSYNTHETIC_PROCESS		GO_TISSUE_DEVELOPMENT				GO_RESPONSE_TO_ORGANIC_CYCLIC_COMPOUND	GO_POSITIVE_REGULATION_OF_GENE_EXPRESSION		GO_RESPONSE_TO_OXYGEN_CONTAINING_COMPOUND
57623	ZFAT	zinc finger and AT hook domain containing	GO_POSITIVE_REGULATION_OF_BIOSYNTHETIC_PROCESS		GO_TISSUE_DEVELOPMENT					GO_POSITIVE_REGULATION_OF_GENE_EXPRESSION
367	AR	androgen receptor	GO_POSITIVE_REGULATION_OF_BIOSYNTHETIC_PROCESS			GO_REGULATION_OF_PHOSPHORUS_METABOLIC_PROCESS			GO_RESPONSE_TO_ORGANIC_CYCLIC_COMPOUND	GO_POSITIVE_REGULATION_OF_GENE_EXPRESSION	GO_POSITIVE_REGULATION_OF_PHOSPHORUS_METABOLIC_PROCESS
107	ADCY1	adenylate cyclase 1 (brain)	GO_POSITIVE_REGULATION_OF_BIOSYNTHETIC_PROCESS			GO_REGULATION_OF_PHOSPHORUS_METABOLIC_PROCESS			GO_RESPONSE_TO_ORGANIC_CYCLIC_COMPOUND		GO_POSITIVE_REGULATION_OF_PHOSPHORUS_METABOLIC_PROCESS	GO_RESPONSE_TO_OXYGEN_CONTAINING_COMPOUND
5449	POU1F1	POU class 1 homeobox 1	GO_POSITIVE_REGULATION_OF_BIOSYNTHETIC_PROCESS			GO_REGULATION_OF_PHOSPHORUS_METABOLIC_PROCESS				GO_POSITIVE_REGULATION_OF_GENE_EXPRESSION	GO_POSITIVE_REGULATION_OF_PHOSPHORUS_METABOLIC_PROCESS
4160	MC4R	melanocortin 4 receptor	GO_POSITIVE_REGULATION_OF_BIOSYNTHETIC_PROCESS			GO_REGULATION_OF_PHOSPHORUS_METABOLIC_PROCESS					GO_POSITIVE_REGULATION_OF_PHOSPHORUS_METABOLIC_PROCESS	GO_RESPONSE_TO_OXYGEN_CONTAINING_COMPOUND
10487	CAP1	CAP, adenylate cyclase-associated protein 1 (yeast)	GO_POSITIVE_REGULATION_OF_BIOSYNTHETIC_PROCESS			GO_REGULATION_OF_PHOSPHORUS_METABOLIC_PROCESS					GO_POSITIVE_REGULATION_OF_PHOSPHORUS_METABOLIC_PROCESS
3605	IL17A	interleukin 17A	GO_POSITIVE_REGULATION_OF_BIOSYNTHETIC_PROCESS					GO_POSITIVE_REGULATION_OF_RESPONSE_TO_STIMULUS	GO_RESPONSE_TO_ORGANIC_CYCLIC_COMPOUND	GO_POSITIVE_REGULATION_OF_GENE_EXPRESSION		GO_RESPONSE_TO_OXYGEN_CONTAINING_COMPOUND
148022	TICAM1	toll-like receptor adaptor molecule 1	GO_POSITIVE_REGULATION_OF_BIOSYNTHETIC_PROCESS					GO_POSITIVE_REGULATION_OF_RESPONSE_TO_STIMULUS	GO_RESPONSE_TO_ORGANIC_CYCLIC_COMPOUND	GO_POSITIVE_REGULATION_OF_GENE_EXPRESSION		GO_RESPONSE_TO_OXYGEN_CONTAINING_COMPOUND
55252	ASXL2	additional sex combs like 2 (Drosophila)	GO_POSITIVE_REGULATION_OF_BIOSYNTHETIC_PROCESS					GO_POSITIVE_REGULATION_OF_RESPONSE_TO_STIMULUS		GO_POSITIVE_REGULATION_OF_GENE_EXPRESSION
9282	MED14	mediator complex subunit 14	GO_POSITIVE_REGULATION_OF_BIOSYNTHETIC_PROCESS						GO_RESPONSE_TO_ORGANIC_CYCLIC_COMPOUND	GO_POSITIVE_REGULATION_OF_GENE_EXPRESSION
552	AVPR1A	arginine vasopressin receptor 1A	GO_POSITIVE_REGULATION_OF_BIOSYNTHETIC_PROCESS						GO_RESPONSE_TO_ORGANIC_CYCLIC_COMPOUND			GO_RESPONSE_TO_OXYGEN_CONTAINING_COMPOUND
6670	SP3	Sp3 transcription factor	GO_POSITIVE_REGULATION_OF_BIOSYNTHETIC_PROCESS							GO_POSITIVE_REGULATION_OF_GENE_EXPRESSION
7789	ZXDA	zinc finger, X-linked, duplicated A	GO_POSITIVE_REGULATION_OF_BIOSYNTHETIC_PROCESS							GO_POSITIVE_REGULATION_OF_GENE_EXPRESSION
140609	NEK7	NIMA (never in mitosis gene a)-related kinase 7	GO_POSITIVE_REGULATION_OF_BIOSYNTHETIC_PROCESS
5144	PDE4D	phosphodiesterase 4D, cAMP-specific		AACTTT_UNKNOWN	GO_TISSUE_DEVELOPMENT	GO_REGULATION_OF_PHOSPHORUS_METABOLIC_PROCESS	TTGTTT_FOXO4_01	GO_POSITIVE_REGULATION_OF_RESPONSE_TO_STIMULUS	GO_RESPONSE_TO_ORGANIC_CYCLIC_COMPOUND			GO_RESPONSE_TO_OXYGEN_CONTAINING_COMPOUND
2254	FGF9	fibroblast growth factor 9 (glia-activating factor)		AACTTT_UNKNOWN	GO_TISSUE_DEVELOPMENT	GO_REGULATION_OF_PHOSPHORUS_METABOLIC_PROCESS	TTGTTT_FOXO4_01	GO_POSITIVE_REGULATION_OF_RESPONSE_TO_STIMULUS		GO_POSITIVE_REGULATION_OF_GENE_EXPRESSION	GO_POSITIVE_REGULATION_OF_PHOSPHORUS_METABOLIC_PROCESS
2045	EPHA7	EPH receptor A7		AACTTT_UNKNOWN	GO_TISSUE_DEVELOPMENT	GO_REGULATION_OF_PHOSPHORUS_METABOLIC_PROCESS	TTGTTT_FOXO4_01				GO_POSITIVE_REGULATION_OF_PHOSPHORUS_METABOLIC_PROCESS
340419	RSPO2	R-spondin 2		AACTTT_UNKNOWN	GO_TISSUE_DEVELOPMENT			GO_POSITIVE_REGULATION_OF_RESPONSE_TO_STIMULUS
80059	LRRTM4	leucine rich repeat transmembrane neuronal 4		AACTTT_UNKNOWN		GO_REGULATION_OF_PHOSPHORUS_METABOLIC_PROCESS	TTGTTT_FOXO4_01
157313	CDCA2	cell division cycle associated 2		AACTTT_UNKNOWN		GO_REGULATION_OF_PHOSPHORUS_METABOLIC_PROCESS					GO_POSITIVE_REGULATION_OF_PHOSPHORUS_METABOLIC_PROCESS
51678	MPP6	membrane protein, palmitoylated 6 (MAGUK p55 subfamily member 6)		AACTTT_UNKNOWN			TTGTTT_FOXO4_01
5099	PCDH7	protocadherin 7		AACTTT_UNKNOWN			TTGTTT_FOXO4_01
138046	RALYL	RALY RNA binding protein-like		AACTTT_UNKNOWN			TTGTTT_FOXO4_01
50508	NOX3	NADPH oxidase 3		AACTTT_UNKNOWN			TTGTTT_FOXO4_01
11279	KLF8	Kruppel-like factor 8		AACTTT_UNKNOWN			TTGTTT_FOXO4_01
9378	NRXN1	neurexin 1		AACTTT_UNKNOWN				GO_POSITIVE_REGULATION_OF_RESPONSE_TO_STIMULUS
6678	SPARC	secreted protein, acidic, cysteine-rich (osteonectin)		AACTTT_UNKNOWN					GO_RESPONSE_TO_ORGANIC_CYCLIC_COMPOUND			GO_RESPONSE_TO_OXYGEN_CONTAINING_COMPOUND
2710	GK	glycerol kinase		AACTTT_UNKNOWN								GO_RESPONSE_TO_OXYGEN_CONTAINING_COMPOUND
83879	CDCA7	cell division cycle associated 7		AACTTT_UNKNOWN
6482	ST3GAL1	ST3 beta-galactoside alpha-2,3-sialyltransferase 1		AACTTT_UNKNOWN
115827	RAB3C	RAB3C, member RAS oncogene family		AACTTT_UNKNOWN
800	CALD1	caldesmon 1		AACTTT_UNKNOWN
116984	ARAP2	ArfGAP with RhoGAP domain, ankyrin repeat and PH domain 2		AACTTT_UNKNOWN
4685	NCAM2	neural cell adhesion molecule 2		AACTTT_UNKNOWN
256536	TCERG1L	transcription elongation regulator 1-like		AACTTT_UNKNOWN
6476	SI	sucrase-isomaltase (alpha-glucosidase)		AACTTT_UNKNOWN
10006	ABI1	abl-interactor 1			GO_TISSUE_DEVELOPMENT	GO_REGULATION_OF_PHOSPHORUS_METABOLIC_PROCESS		GO_POSITIVE_REGULATION_OF_RESPONSE_TO_STIMULUS			GO_POSITIVE_REGULATION_OF_PHOSPHORUS_METABOLIC_PROCESS
1373	CPS1	carbamoyl-phosphate synthase 1, mitochondrial			GO_TISSUE_DEVELOPMENT		TTGTTT_FOXO4_01		GO_RESPONSE_TO_ORGANIC_CYCLIC_COMPOUND			GO_RESPONSE_TO_OXYGEN_CONTAINING_COMPOUND
10481	HOXB13	homeobox B13			GO_TISSUE_DEVELOPMENT		TTGTTT_FOXO4_01		GO_RESPONSE_TO_ORGANIC_CYCLIC_COMPOUND			GO_RESPONSE_TO_OXYGEN_CONTAINING_COMPOUND
1295	COL8A1	collagen, type VIII, alpha 1			GO_TISSUE_DEVELOPMENT		TTGTTT_FOXO4_01
79633	FAT4	FAT tumor suppressor homolog 4 (Drosophila)			GO_TISSUE_DEVELOPMENT		TTGTTT_FOXO4_01
27152	INTU	inturned planar cell polarity effector homolog (Drosophila)			GO_TISSUE_DEVELOPMENT			GO_POSITIVE_REGULATION_OF_RESPONSE_TO_STIMULUS
6546	SLC8A1	solute carrier family 8 (sodium/calcium exchanger), member 1			GO_TISSUE_DEVELOPMENT				GO_RESPONSE_TO_ORGANIC_CYCLIC_COMPOUND			GO_RESPONSE_TO_OXYGEN_CONTAINING_COMPOUND
9562	MINPP1	multiple inositol-polyphosphate phosphatase 1			GO_TISSUE_DEVELOPMENT
6445	SGCG	sarcoglycan, gamma (35kDa dystrophin-associated glycoprotein)			GO_TISSUE_DEVELOPMENT
79192	IRX1	iroquois homeobox 1			GO_TISSUE_DEVELOPMENT
284	ANGPT1	angiopoietin 1				GO_REGULATION_OF_PHOSPHORUS_METABOLIC_PROCESS	TTGTTT_FOXO4_01	GO_POSITIVE_REGULATION_OF_RESPONSE_TO_STIMULUS			GO_POSITIVE_REGULATION_OF_PHOSPHORUS_METABOLIC_PROCESS
260425	MAGI3	membrane associated guanylate kinase, WW and PDZ domain containing 3				GO_REGULATION_OF_PHOSPHORUS_METABOLIC_PROCESS	TTGTTT_FOXO4_01
5770	PTPN1	protein tyrosine phosphatase, non-receptor type 1				GO_REGULATION_OF_PHOSPHORUS_METABOLIC_PROCESS		GO_POSITIVE_REGULATION_OF_RESPONSE_TO_STIMULUS			GO_POSITIVE_REGULATION_OF_PHOSPHORUS_METABOLIC_PROCESS	GO_RESPONSE_TO_OXYGEN_CONTAINING_COMPOUND
7060	THBS4	thrombospondin 4				GO_REGULATION_OF_PHOSPHORUS_METABOLIC_PROCESS		GO_POSITIVE_REGULATION_OF_RESPONSE_TO_STIMULUS			GO_POSITIVE_REGULATION_OF_PHOSPHORUS_METABOLIC_PROCESS
222643	UNC5CL	unc-5 homolog C (C. elegans)-like				GO_REGULATION_OF_PHOSPHORUS_METABOLIC_PROCESS		GO_POSITIVE_REGULATION_OF_RESPONSE_TO_STIMULUS			GO_POSITIVE_REGULATION_OF_PHOSPHORUS_METABOLIC_PROCESS
2192	FBLN1	fibulin 1				GO_REGULATION_OF_PHOSPHORUS_METABOLIC_PROCESS				GO_POSITIVE_REGULATION_OF_GENE_EXPRESSION
10040	TOM1L1	target of myb1 (chicken)-like 1				GO_REGULATION_OF_PHOSPHORUS_METABOLIC_PROCESS					GO_POSITIVE_REGULATION_OF_PHOSPHORUS_METABOLIC_PROCESS
54986	ULK4	unc-51-like kinase 4 (C. elegans)				GO_REGULATION_OF_PHOSPHORUS_METABOLIC_PROCESS
81706	PPP1R14C	protein phosphatase 1, regulatory (inhibitor) subunit 14C				GO_REGULATION_OF_PHOSPHORUS_METABOLIC_PROCESS
51074	APIP	APAF1 interacting protein				GO_REGULATION_OF_PHOSPHORUS_METABOLIC_PROCESS
10268	RAMP3	receptor (G protein-coupled) activity modifying protein 3					TTGTTT_FOXO4_01		GO_RESPONSE_TO_ORGANIC_CYCLIC_COMPOUND			GO_RESPONSE_TO_OXYGEN_CONTAINING_COMPOUND
535	ATP6V0A1	ATPase, H+ transporting, lysosomal V0 subunit a1					TTGTTT_FOXO4_01					GO_RESPONSE_TO_OXYGEN_CONTAINING_COMPOUND
2572	GAD2	glutamate decarboxylase 2 (pancreatic islets and brain, 65kDa)					TTGTTT_FOXO4_01
2823	GPM6A	glycoprotein M6A					TTGTTT_FOXO4_01
10943	MSL3	male-specific lethal 3 homolog (Drosophila)					TTGTTT_FOXO4_01
126868	MAB21L3	mab-21-like 3 (C. elegans)					TTGTTT_FOXO4_01
2747	GLUD2	glutamate dehydrogenase 2					TTGTTT_FOXO4_01
57162	PELI1	pellino homolog 1 (Drosophila)						GO_POSITIVE_REGULATION_OF_RESPONSE_TO_STIMULUS	GO_RESPONSE_TO_ORGANIC_CYCLIC_COMPOUND			GO_RESPONSE_TO_OXYGEN_CONTAINING_COMPOUND
5366	PMAIP1	phorbol-12-myristate-13-acetate-induced protein 1						GO_POSITIVE_REGULATION_OF_RESPONSE_TO_STIMULUS	GO_RESPONSE_TO_ORGANIC_CYCLIC_COMPOUND
4852	NPY	neuropeptide Y						GO_POSITIVE_REGULATION_OF_RESPONSE_TO_STIMULUS
130120	REG3G	regenerating islet-derived 3 gamma						GO_POSITIVE_REGULATION_OF_RESPONSE_TO_STIMULUS
93978	CLEC6A	C-type lectin domain family 6, member A						GO_POSITIVE_REGULATION_OF_RESPONSE_TO_STIMULUS
10558	SPTLC1	serine palmitoyltransferase, long chain base subunit 1						GO_POSITIVE_REGULATION_OF_RESPONSE_TO_STIMULUS
28755	TRAC	T cell receptor alpha constant						GO_POSITIVE_REGULATION_OF_RESPONSE_TO_STIMULUS
29978	UBQLN2	ubiquilin 2						GO_POSITIVE_REGULATION_OF_RESPONSE_TO_STIMULUS
476	ATP1A1	ATPase, Na+/K+ transporting, alpha 1 polypeptide							GO_RESPONSE_TO_ORGANIC_CYCLIC_COMPOUND			GO_RESPONSE_TO_OXYGEN_CONTAINING_COMPOUND
57690	TNRC6C	trinucleotide repeat containing 6C								GO_POSITIVE_REGULATION_OF_GENE_EXPRESSION
127124	ATP6V1G3	ATPase, H+ transporting, lysosomal 13kDa, V1 subunit G3										GO_RESPONSE_TO_OXYGEN_CONTAINING_COMPOUND
8239	USP9X	ubiquitin specific peptidase 9, X-linked
22906	TRAK1	trafficking protein, kinesin binding 1
79834	PEAK1	NKF3 kinase family member
27010	TPK1	thiamin pyrophosphokinase 1
3797	KIF3C	kinesin family member 3C
3070	HELLS	helicase, lymphoid-specific
51542	VPS54	vacuolar protein sorting 54 homolog (S. cerevisiae)
23024	PDZRN3	PDZ domain containing ring finger 3
3376	IARS	isoleucyl-tRNA synthetase
80114	BICC1	bicaudal C homolog 1 (Drosophila)
10226	PLIN3	perilipin 3
1562	CYP2C18	cytochrome P450, family 2, subfamily C, polypeptide 18
63875	MRPL17	mitochondrial ribosomal protein L17
79465	ULBP3	UL16 binding protein 3
22829	NLGN4Y	neuroligin 4, Y-linked
256987	SERINC5	serine incorporator 5
27133	KCNH5	potassium voltage-gated channel, subfamily H (eag-related), member 5
57460	PPM1H	protein phosphatase, Mg2+/Mn2+ dependent, 1H
84643	KIF2B	kinesin family member 2B
54518	APBB1IP	amyloid beta (A4) precursor protein-binding, family B, member 1 interacting protein
284076	TTLL6	tubulin tyrosine ligase-like family, member 6
55619	DOCK10	dedicator of cytokinesis 10
10396	ATP8A1	ATPase, aminophospholipid transporter (APLT), class I, type 8A, member 1
84879	MFSD2A	major facilitator superfamily domain containing 2A
64089	SNX16	sorting nexin 16
53942	CNTN5	contactin 5
153571	C5orf38	chromosome 5 open reading frame 38
29953	TRHDE	thyrotropin-releasing hormone degrading enzyme
1603	DAD1	defender against cell death 1
57497	LRFN2	leucine rich repeat and fibronectin type III domain containing 2
51130	ASB3	ankyrin repeat and SOCS box containing 3
139341	FUNDC1	FUN14 domain containing 1
121227	LRIG3	leucine-rich repeats and immunoglobulin-like domains 3
56951	C5orf15	chromosome 5 open reading frame 15
131566	DCBLD2	discoidin, CUB and LCCL domain containing 2
3355	HTR1F	5-hydroxytryptamine (serotonin) receptor 1F
2834	PRLHR	prolactin releasing hormone receptor
200150	PLD5	phospholipase D family, member 5
54832	VPS13C	vacuolar protein sorting 13 homolog C (S. cerevisiae)
219432	OR4C6	olfactory receptor, family 4, subfamily C, member 6
338755	OR2AG2	olfactory receptor, family 2, subfamily AG, member 2
9860	LRIG2	leucine-rich repeats and immunoglobulin-like domains 2
79781	IQCA1	IQ motif containing with AAA domain 1
2196	FAT2	FAT tumor suppressor homolog 2 (Drosophila)
83851	SYT16	synaptotagmin XVI
5067	CNTN3	contactin 3 (plasmacytoma associated)
4128	MAOA	monoamine oxidase A
9843	HEPH	hephaestin
9859	CEP170	centrosomal protein 170kDa
80258	EFHC2	EF-hand domain (C-terminal) containing 2
149647	FAM71A	family with sequence similarity 71, member A
64708	COPS7B	COP9 constitutive photomorphogenic homolog subunit 7B (Arabidopsis)
8690	JRKL	jerky homolog-like (mouse)
11216	AKAP10	A kinase (PRKA) anchor protein 10
11086	ADAM29	ADAM metallopeptidase domain 29
9758	FRMPD4	FERM and PDZ domain containing 4
118430	MUCL1	mucin-like 1
114786	XKR4	XK, Kell blood group complex subunit-related family, member 4
139886	SPIN4	spindlin family, member 4
203611	CDY2B	chromodomain protein, Y-linked, 2B
84457	PHYHIPL	phytanoyl-CoA 2-hydroxylase interacting protein-like
85365	ALG2	asparagine-linked glycosylation 2, alpha-1,3-mannosyltransferase homolog (S. cerevisiae)
340351	AGBL3	ATP/GTP binding protein-like 3
119710	C11orf74	chromosome 11 open reading frame 74
22852	ANKRD26	ankyrin repeat domain 26
55096	EBLN2	endogenous Bornavirus-like nucleoprotein 2
137695	TMEM68	transmembrane protein 68
26150	RIBC2	RIB43A domain with coiled-coils 2
552889	ATXN7L3B	ataxin 7-like 3B
55138	FAM90A1	family with sequence similarity 90, member A1
440051	KRTAP5-11	keratin associated protein 5-11
503497	MS4A13	membrane-spanning 4-domains, subfamily A, member 13
28676	TRAV10	T cell receptor alpha variable 10
28678	TRAV9-1	T cell receptor alpha variable 9-1
8594	OR5D3P	olfactory receptor, family 5, subfamily D, member 3 pseudogene
