# Supplementary material for: Circular synthesized CRISPR/Cas gRNAs for functional interrogations in the coding and noncoding genome
Source: eLife journal article supplement (doi:10.7554/elife.42549), 2019-03-06
Supplement: supp [file elife-42549-supp-v1.zip › elife_poa_e42549_Supplementary_File_16.xlsx]

## Sheet: Sheet1
Name	Purpose	Sequence (5’-3’)
NHT	gRNA	CACCGaaaaagcttccgcctgatgg
I-SceI	gRNA	CACCGctagggataacagggtaatt
10 nts	3Cs (homology length test)	gctctaaaacYBBNDHDNNNNDNNNNNHNNcGGTGTTTCG
13 nts	3Cs (homology length test)	CtagctctaaaacYBBNDHDNNNNDNNNNNHNNcGGTGTTTCGTCC
15 nts	3Cs (homology length test)	TTCtagctctaaaacYBBNDHDNNN
(TGW)		NDNNNNNHNNcGGTGTTTCGTCCTT
18 nts	3Cs (homology length test)	taTTTCtagctctaaaacYBBNDHDNNNNDNNNNNHNNcGGTGTTTCGTCCTTTCC
gGFP-1	3Cs-gRNA	TTCtagctctaaaacaggtgaagttcgagggcgaccGGTGTTTCGTCCTT
gGFP-2	3Cs-gRNA	TTCtagctctaaaacccctgagcaaagaccccaaccGGTGTTTCGTCCTT
gGFP-3	3Cs-gRNA	TTCtagctctaaaactcgtgaccaccctgacctaccGGTGTTTCGTCCTT
gGFP-4	3Cs-gRNA	TTCtagctctaaaaccggcgcgggtcttgtagttgCcGGTGTTTCGTCCTT
gGFP-5	3Cs-gRNA	TTCtagctctaaaacttcagctcgatgcggttcaccGGTGTTTCGTCCTT
gGFP-6	3Cs-gRNA	TTCtagctctaaaaccggtgaacagctcctcgccccGGTGTTTCGTCCTT
eGFP T7 forward	Amplification of eGFP locus	CAGGACCGGTATGGTGAGCAAGGGCGAGGAGCTGTTCACC
eGFP T7 reverse	Amplification of eGFP locus	ATCCTCTAGAATTACTTGTACAGCTCGTCCATGCC
TGW	3Cs-gRNA	TTCtagctctaaaacYBBNDHDNNNNDNNNNNHNN cGGTGTTTCGTCCTT
oTGW	3Cs-gRNA	taTTTCtagctctaaaacYBBNDHDNNNNDNNNNNcGGTGTTTCGTCCTTTCC
shGFP	3Cs-shRNA	TCGAGAATTCAAAAAaagcatcgacttcaaggaggaCTCGAGtcctccttgaagtcgatgcttCCGGTGTTTCGTCCT
shLuciferase#1	3Cs-shRNA	CGAGGTCGAGAATTCAAAAAAAGGAAAGACGATGACGGAAAAACTCGAGTTTTTCCGTCATCGTCTTTCCCGGTGTTTCGTCCT
shLuciferase#2	3Cs-shRNA	CGAGGTCGAGAATTCAAAAAAAGGATCTGGATACCGGGAAAACCTCGAGGTTTTCCCGGTATCCAGATCCCGGTGTTTCGTCCT
shPlk1#1	3Cs-shRNA	CGAGGTCGAGAATTCAAAAAAAGAGAAGATGTCCATGGAAATACTCGAGTATTTCCATGGACATCTTCTCCGGTGTTTCGTCCT
shPlk1#2	3Cs-shRNA	CGAGGTCGAGAATTCAAAAAAAGGATCAAGAAGAATGAATACACTCGAGTGTATTCATTCTTCTTGATCCCGGTGTTTCGTCCT
shUsp28#1	3Cs-shRNA	CGAGGTCGAGAATTCAAAAAAATGGAAAGGTATGTGAAATATGCTCGAGCATATTTCACATACCTTTCCACGGTGTTTCGTCCT
shUsp28#2	3Cs-shRNA	CGAGGTCGAGAATTCAAAAAAATCACAGATGAGGAGATAAATTCTCGAGAATTTATCTCCTCATCTGTGACGGTGTTTCGTCCT
shBRCC3#1	3Cs-shRNA	CGAGGTCGAGAATTCAAAAAAACAACAGAGGCAGAGAGGTTGGCTCGAGCCAACCTCTCTGCCTCTGTTGCGGTGTTTCGTCCT
shBRCC3#2	3Cs-shRNA	CGAGGTCGAGAATTCAAAAAAAGCACAGAGAAGGAGGAAGTAACTCGAGTTACTTCCTCCTTCTCTGTGCCGGTGTTTCGTCCT
shCOPS6#1	3Cs-shRNA	CGAGGTCGAGAATTCAAAAAAACAGACAAGTTCAAGACAGATTCTCGAGAATCTGTCTTGAACTTGTCTGCGGTGTTTCGTCCT
shCOPS6#2	3Cs-shRNA	CGAGGTCGAGAATTCAAAAAAACCAAGGAGGAGCAGTTTAAACCTCGAGGTTTAAACTGCTCCTCCTTGGCGGTGTTTCGTCCT
shPSMD14#1	3Cs-shRNA	CGAGGTCGAGAATTCAAAAAAACAATAAGGCTGTAGAAGAAGACTCGAGTCTTCTTCTACAGCCTTATTGCGGTGTTTCGTCCT
shPSMD14#2	3Cs-shRNA	CGAGGTCGAGAATTCAAAAAAAGGACATGAACCAAGACAAACACTCGAGTGTTTGTCTTGGTTCATGTCCCGGTGTTTCGTCCT
F1	NGS-F	AATGATACGGCGACCACCGAGATCTACACTCTTTCCCTACACGACGCTCTTCCGATCTtTAAGGCGAtcttgtggaaaggacgaaacaccg
F2	NGS-F	AATGATACGGCGACCACCGAGATCTACACTCTTTCCCTACACGACGCTCTTCCGATCTatCGTACTAGtcttgtggaaaggacgaaacaccg
F3	NGS-F	AATGATACGGCGACCACCGAGATCTACACTCTTTCCCTACACGACGCTCTTCCGATCTgatAGGCAGAAtcttgtggaaaggacgaaacaccg
F4	NGS-F	AATGATACGGCGACCACCGAGATCTACACTCTTTCCCTACACGACGCTCTTCCGATCTcgatTCCTGAGCtcttgtggaaaggacgaaacaccg
F5	NGS-F	AATGATACGGCGACCACCGAGATCTACACTCTTTCCCTACACGACGCTCTTCCGATCTtcgatGGACTCCTtcttgtggaaaggacgaaacaccg
F6	NGS-F	AATGATACGGCGACCACCGAGATCTACACTCTTTCCCTACACGACGCTCTTCCGATCTatcgatTAGGCATGtcttgtggaaaggacgaaacaccg
F7	NGS-F	AATGATACGGCGACCACCGAGATCTACACTCTTTCCCTACACGACGCTCTTCCGATCTgatcgatCTCTCTACtcttgtggaaaggacgaaacaccg
F8	NGS-F	AATGATACGGCGACCACCGAGATCTACACTCTTTCCCTACACGACGCTCTTCCGATCTcgatcgatCGAGGCTGtcttgtggaaaggacgaaacaccg
R1	NGS-R	CAAGCAGAAGACGGCATACGAGATAAGAGGCAGTGACTGGAGTTCAGACGTGTGCTCTTCCGATCTtccaattcccactcctttcaagacct
R2	NGS-R	CAAGCAGAAGACGGCATACGAGATGTAGAGGAGTGACTGGAGTTCAGACGTGTGCTCTTCCGATCTatccaattcccactcctttcaagacct
R3	NGS-R	CAAGCAGAAGACGGCATACGAGATGCTCATGAGTGACTGGAGTTCAGACGTGTGCTCTTCCGATCTgatccaattcccactcctttcaagacct
R4	NGS-R	CAAGCAGAAGACGGCATACGAGATATCTCAGGGTGACTGGAGTTCAGACGTGTGCTCTTCCGATCTcgatccaattcccactcctttcaagacct
R5	NGS-R	CAAGCAGAAGACGGCATACGAGATACTCGCTAGTGACTGGAGTTCAGACGTGTGCTCTTCCGATCTtcgatccaattcccactcctttcaagacct
R6	NGS-R	CAAGCAGAAGACGGCATACGAGATGGAGCTACGTGACTGGAGTTCAGACGTGTGCTCTTCCGATCTatcgatccaattcccactcctttcaagacct
R7	NGS-R	CAAGCAGAAGACGGCATACGAGATGCGTAGTAGTGACTGGAGTTCAGACGTGTGCTCTTCCGATCTgatcgatccaattcccactcctttcaagacct
R8	NGS-R	5’CAAGCAGAAGACGGCATACGAGATCGGAGCCTGTGACTGGAGTTCAGACGTGTGCTCTTCCGATCTcgatcgatccaattcccactcctttcaagacct
R9	NGS-R	CAAGCAGAAGACGGCATACGAGATTACGCTGCGTGACTGGAGTTCAGACGTGTGCTCTTCCGATCTacgatcgatccaattcccactcctttcaagacct
U6	SANGER-seq	GGGCCTATTTCCCATGATTCCTTCATATTTGC
U6-M13	SANGER-seq	TGTAAAACGACGGCCAGTCACgggcctatttcccatgattccttcatatttgc
v4N	Randomized 4N	GCTATTTCTAGCTCTAAAACCAGTGATGANNNNTGAGGCTCGTTTCGTCCTTTCCACAA
V5N	Randomized 5N	GCTATTTCTAGCTCTAAAACCAGTGATGNNNNNTGAGGCTCGTTTCGTCCTTTCCACAA
v6N	Randomized 6N	GCTATTTCTAGCTCTAAAACCAGTGATGNNNNNNGAGGCTCGTTTCGTCCTTTCCACAA
v7N	Randomized 7N	GCTATTTCTAGCTCTAAAACCAGTGATNNNNNNNGAGGCTCGTTTCGTCCTTTCCACAA
v8N	Randomized 8N	GCTATTTCTAGCTCTAAAACCAGTGATNNNNNNNNAGGCTCGTTTCGTCCTTTCCACAA
v9N	Randomized 9N	GCTATTTCTAGCTCTAAAACCAGTGANNNNNNNNNAGGCTCGTTTCGTCCTTTCCACAA
