# Supplementary material for: Circular synthesized CRISPR/Cas gRNAs for functional interrogations in the coding and noncoding genome
Source: eLife journal article supplement (doi:10.7554/elife.42549), 2019-03-06
Supplement: supp [file elife-42549-supp-v1.zip › elife_poa_e42549_Supplementary_File_17.xlsx]

## Sheet: Sheet1
4N		5N		6N		7N		8N		9N
Motif	Count	Motif	Count	Motif	Count	Motif	Count	Motif	Count	Motif	Count
CCCC	420731	CCCCC	91696	CCACCC	29960	CCCCCCC	37544	CCCCCCCC	364364	CCCCCCGCC	3028
CACC	272636	CCCAC	80005	CCCCCA	28484	CCGCCCC	28998	CCCCCCAC	57478	GCCCCCCCC	2757
TCCC	260972	CACCC	76881	CCCCAC	27695	CCCCCAC	26544	CCCCCCTC	49653	CCCCCCCGC	2713
CCCT	258780	CCCCA	75097	CCCACC	26874	CGCCCCC	26434	CCCCCCGC	45317	CGCCCCCCC	2467
CCCA	256877	ACCCC	71824	ACCCCC	26126	CCCGCCC	26128	CCCACCCC	44544	CCCCCCCAC	2250
ACCC	255087	CCACC	70862	CCCCCC	25562	CCCCACC	26041	CCACCCCC	44537	CCCCCCCCA	2244
CTCC	249556	CACAC	67306	CCCCCT	24848	CCACCCC	25742	CCTCCCCC	43346	GCCCGCCCC	2196
CCTC	234809	CCCCT	65672	CCCCCG	24397	CCCCGCC	25724	CCCCACCC	42596	CCCGCCCCC	2192
CCAC	233119	CCCAA	65518	CACCCC	24310	CCCACCC	24949	ACCCCCCC	42288	CCCCCCACC	2126
GCCC	227608	CTCCC	65492	CCCCTC	24135	CCTCCCC	24813	CCCCCCCA	42167	CCGCCCCCC	2099
CCCG	211237	GCCCC	64244	CCTCCC	23674	CTCCCCC	24450	CCGCCCCC	42064	GCCCCCGCC	2071
CGCC	207749	CCCTC	64044	CCCCGC	23538	GCCCCCC	24331	CCCCCACC	41661	GCGCCCCCC	2034
CCGC	194557	CCCGC	61417	CCACAC	22821	CCCCTCC	24014	CCCCTCCC	41466	CCCCCCTCC	1958
TACC	193031	TCCCC	61049	CCCACA	22713	ACCCCCC	23851	CCCCGCCC	41152	GCCCCCCGC	1938
CACA	190000	CGCCC	61018	CTCCCC	22694	CCCTCCC	23668	CCCGCCCC	40450	GGCCCCCCC	1931
TTCC	182763	CCTCC	59917	CCCTCC	22001	CCCCCTC	23617	CCCTCCCC	39677	CCCCCGCCC	1925
CCTA	181133	ACCAC	59819	CCACCA	21939	CCCCCGC	23394	TCCCCCCC	37481	CCCCCCCTC	1923
CACT	178619	CACCA	59602	CACCCA	21933	CCCCCCA	22866	GCCCCCCC	36114	GCCGCCCCC	1878
ACCT	171276	CCGCC	59168	CACACC	21582	CACCCCC	22865	CCCCCGCC	35897	CGGCCCCCC	1799
TCCA	169383	ACACC	58736	CGCCCC	21575	TCCCCCC	22304	CCCCCTCC	35491	CCCCGCCCC	1797
CTAC	169275	CCCCG	58698	ACACCC	21412	CCCCCCT	20242	CCCCCCCT	34824	TCCCCCCCC	1762
ACAC	168341	CCACA	57071	TCCCCC	21330	CCCCCCG	18847	CACCCCCC	32642	CCCCTCCCC	1745
TGCC	167853	CCAAC	56648	GCCCCC	21326	CCCACAC	14806	CCCCCCCG	30726	CACCCCCCC	1742
CTCA	167767	ACCCA	56495	CCGCCC	21164	CACACCC	14271	CTCCCCCC	30712	CCGCCCCGC	1716
ACCA	167532	CACAA	56028	CCCGCC	21109	CCCCACA	14239	CGCCCCCC	30696	ACCCCCCCC	1715
CTTC	167510	CAACC	55295	CCCCAA	21081	CCGACCC	14098	CCACCCAC	9863	CCCCCTCCC	1700
AACC	166003	CCTAC	54242	ACCCCA	21065	CACCCAC	14077	ACCCCCAC	9820	GCCCCGCCC	1680
CCTT	165247	CCCAT	54211	CCAACC	20025	CCACACC	13957	CCCCACAC	9328	GGGCCCCCC	1645
ATCC	164864	AACCC	53663	ACCACC	19918	CTGCCCC	13915	ACACCCCC	8641	CTCCCCCCC	1622
TCCT	161261	CCCTA	53612	CACCAC	19888	GGCCCCC	13738	CCACCCTC	8333	GCCCCCCCG	1602
CTCT	160691	CTCAC	52851	ACCCAC	19686	CACCCCA	13515	ACCCCCTC	8181	CCCCCCGGC	1596
CATC	160097	TACCC	52810	CCCAAC	19673	CTACCCC	13317	CCCACCAC	8126	CCCCCACCC	1592
CAAC	159858	CTACC	52339	CAACCC	19424	CCCCAAC	13284	CCCCTCAC	7817	GCCCCCCAC	1591
TCAC	159062	GACCC	52205	CCCCTA	19309	CCGCCAC	13205	CCACCCCA	7812	CCCTCCCCC	1576
GACC	157620	CCGAC	52030	CCACCT	19032	ACCCCAC	13144	CCACACCC	7768	GCCCACCCC	1574
CCAA	155672	GCCAC	51895	ACCCCT	18703	CCACCAC	13135	CCTCCCAC	7687	CGCCCCCGC	1565
CCAT	155078	CACCT	51406	CTACCC	18489	CCCGGCC	13107	ACTCCCCC	7514	CGCCCCGCC	1532
TCTC	153937	AACAC	51012	CCACCG	18374	CACCACC	13025	ACCCACCC	7412	CGCGCCCCC	1532
ACTC	153145	CGCAC	50871	AACCCC	18217	CCGGCCC	13008	ACCCCCCA	7213	GCCCCCACC	1517
CCTG	152227	CCAAA	50674	CACCCT	18194	CCTGCCC	12994	CCCCACTC	7154	GCCCCCCCA	1497
CACG	150474	ACCAA	49351	CCCTCA	18067	CACGCCC	12959	CACCCCAC	7061	CCCCCCGCA	1477
CCGA	148512	CCCGA	49114	CCAACA	17984	ACCACCC	12949	TCCCCCAC	7052	CCCCCCGCG	1476
GGCC	147592	GGCCC	49015	CCTACC	17939	ACACCCC	12940	ACCACCCC	6995	GCCACCCCC	1460
GTCC	144696	ATCCC	48991	CCCACG	17877	CCACCCA	12811	CCCCCCAA	6882	CCCGCCCCG	1455
GCCT	143943	GCCCA	48868	CCCACT	17833	CCTACCC	12810	ACCCTCCC	6818	CCGCCCCCG	1453
GCCA	143854	ACCCT	48684	CACACA	17779	CCCCTAC	12795	TCACCCCC	6786	GCCCCCCTC	1440
AGCC	143549	CGACC	48305	CCACGC	17728	CCCTCAC	12741	CCCACCTC	6775	CCCCCGGCC	1440
TACA	143227	CACTC	48221	ACACCA	17583	CGGCCCC	12704	CCCCCCTA	6756	CCCCCCGAC	1438
CCGT	140505	CTCCA	48198	CCACTC	17463	CGCCCAC	12639	CCCCCAAC	6748	CCCGCCGCC	1437
CGCA	140304	ACACA	48003	CCCCGA	17394	CCCGCAC	12613	CCGCCCAC	6687	CCTCCCCCC	1434
CTGC	140242	CACGC	47843	CACCCG	17365	CCGCCCA	12606	CCACCACC	6596	CCCCCCCGG	1417
TCCG	139197	CAACA	47557	CCTCCA	17197	GACCCCC	12605	GCCCCCAC	6569	CCCCGCGCC	1415
ACCG	139049	AGCCC	47302	CCTCAC	17186	GCGCCCC	12577	CCTCCCTC	6541	CGGGCCCCC	1413
CGCT	137267	GCACC	47077	GACCCC	16979	CGCGCCC	12560	CCCACCCA	6498	CCCGCCCGC	1411
CATA	133523	CATCC	46994	ACACAC	16976	CCCACCT	12548	ACCCCACC	6472	CCACCCCCC	1399
CTTA	133322	TCCCA	46697	CCCCAT	16962	ACCCCCA	12543	CCACTCCC	6464	CCCGCCCCA	1399
GCAC	132951	CCTAA	46482	GCACCC	16944	CGACCCC	12490	ACCCCCGC	6456	CCGCCCCCA	1388
CCGG	131956	ACCTC	46431	CACCTC	16917	CCCACCA	12483	CCCCCACA	6456	CCCCGCCGC	1369
CGAC	131779	CCACT	46361	CTCACC	16846	CCCAACC	12443	CCACCCGC	6416	GCCCCACCC	1367
TTAC	131542	CACAT	46319	ACCACA	16631	ACGCCCC	12421	CCCTCCAC	6416	CCCGGCCCC	1363
AACA	131240	CCCAG	46214	CACTCC	16565	CAGCCCC	12418	ACGCCCCC	6414	CCGCCCGCC	1362
TACT	131220	TACAC	45973	CCACAA	16556	CCCGACC	12334	CCCCTCTC	6132	CCCCCCCCG	1357
ACGC	130222	CCTCA	45954	ACCCTC	16548	CTCACCC	12330	TCCCCCTC	6124	CCCCCCCCT	1357
TTCA	130169	CACCG	45877	CCATCC	16515	ACCCACC	12327	CCCCACGC	6119	CGCCCCCCG	1355
TAAC	128711	ACAAC	45872	TACCCC	16514	CACCCTC	12296	CCCCACCA	6102	GCCCTCCCC	1355
TCGC	128440	TCCAC	45653	ACCCCG	16484	CCGCACC	12259	CCCACACC	6091	CCCCCCACA	1354
CTTT	128127	CGCCA	45575	CCCCAG	16352	CCACGCC	12245	CCTCCCCA	6087	GCCTCCCCC	1348
ACTA	126397	CATAC	45479	CTCCCA	16324	CCCCCTA	12225	ACCCGCCC	6040	CCCCACCCC	1346
CATT	125958	TCACC	45468	TCACCC	16324	CCAACCC	12195	CCACCCCT	5987	GCCCCCTCC	1341
TTTC	124599	CCGCA	45462	CAACCA	16199	CCCGCCA	12183	CCTCACCC	5976	CCCCCCGGG	1331
TCTA	124103	CAAAC	45407	CCCGCA	16178	CCTCACC	12156	CCAACCCC	5940	GCTCCCCCC	1328
TATC	123674	CCCTT	45383	GCCCCA	16161	GCCACCC	12133	CCCCCCTT	5933	CCCCACGCC	1328
CTAA	123385	CAGCC	45239	CACCGC	16118	CACTCCC	12130	ACCCCCCT	5924	CCGGCCCCC	1325
ACTT	123275	ACGCC	45072	CAACAC	16100	ACCGCCC	12102	ACCTCCCC	5923	CCGCCCCAC	1323
ACAA	122762	TTCCC	44992	CGACCC	16086	CGCCCCA	12095	TCTCCCCC	5913	ACCCCCGCC	1319
ATAC	122745	ACCGC	44789	GCCACC	16080	CGCACCC	12093	CCTACCCC	5911	ACGCCCCCC	1317
TTCT	122005	GACAC	44727	ACCTCC	16060	CCACCTC	12084	CCCACCGC	5883	CCCACCCCC	1314
GCCG	121674	CTCAA	44693	TCCCCA	16036	CCCCGAC	12049	CCACGCCC	5881	GCCCCCCCT	1297
AACT	121452	CCATC	44599	ACCCAA	15939	CCCACTC	12046	CCCCGCAC	5875	CCGCCGCCC	1294
CAAA	120850	CAAAA	44584	ACTCCC	15872	CCACCCT	12033	CCCCCCAT	5852	CCCCCCCGA	1292
CAGC	119792	TGCCC	44518	GCCCAC	15835	CCCCACT	12024	GCCCCCTC	5778	CCCGCCCAC	1289
CGTC	119757	GTCCC	44079	CGCCCA	15777	CGCCACC	11990	CCCCCTAC	5769	CCCCCACAC	1266
CTAT	119420	CTAAC	44076	CCTACA	15743	CTCCCAC	11989	CCCCTCCA	5737	GCCCCTCCC	1263
CTCG	119413	CTGCC	44024	CACGCC	15734	CTCCCCA	11953	CACCCCTC	5704	GACCCCCCC	1259
ACAT	119352	CTACA	43870	CCCCTG	15724	CCTCCAC	11943	CCCCACCT	5671	AGCCCCCCC	1258
ATCA	119068	ACTCC	43399	CATCCC	15708	CCCTCCA	11921	CCCGCCAC	5575	CCGCGCCCC	1254
TCTT	117496	AACAA	43148	CCCCTT	15605	CACCGCC	11894	CCTCCCGC	5566	CGCCGCCCC	1247
CTGA	115904	ACCCG	42787	CCCATC	15571	TGCCCCC	11888	CCCACCCT	5549	CCCCCGCGC	1241
GCGC	115461	ACAAA	42261	CCCAAA	15516	TACCCCC	11864	CCCCCCGA	5539	GCACCCCCC	1240
ATTC	115375	CAGAC	42228	AACACC	15444	CCCCCAA	11855	CTCCCCAC	5496	ACCGCCCCC	1239
ATCT	115268	AACCA	42152	CACCAA	15376	CCCACGC	11845	ACCGCCCC	5449	CCCCCCTGC	1234
TGCA	115209	CTTCC	42063	CCGACC	15342	CCCCTCA	11826	CCGCCCTC	5425	CCCCCACCA	1231
TCAA	114603	CCACG	41963	CCCGAC	15285	CCTCCCA	11805	TCCCCCCA	5400	CCCCCGCCG	1222
CAAT	114310	CACTA	41920	AACCCA	15186	GCCCCAC	11802	CCCTCCTC	5388	GGCCCCGCC	1220
CGCG	113863	ACTAC	41405	CGCACC	15173	CAACCCC	11767	CCCTCCCA	5326	ACCCCCCCA	1219
CCAG	113582	TACCA	41402	CCGCCA	15125	ACCCCTC	11747	CACACCCC	5316	CCCCCTGCC	1212
TGAC	112988	GCGCC	41308	ACCCGC	15075	CCCTGCC	11744	ACCCCTCC	5307	CCCCCCGTC	1210
TACG	111721	ATACC	41229	CCAGCC	15074	GCCCACC	11730	TCCCTCCC	5298	TGCCCCCCC	1206
TTGC	111660	CCTGC	41196	ACAACC	15023	GCCGCCC	11705	GCACCCCC	5260	CCCCCACGC	1205
AAAC	111267	CCCTG	41132	CACCTA	14930	CCAGCCC	11705	CCCCCATC	5255	CCGCCCACC	1203
CATG	110739	GCCCT	41088	CCCAGC	14924	CCGCGCC	11672	CCCCTCGC	5249	CCCGACCCC	1202
GACA	110083	CTCCT	41069	CGCCAC	14899	AACCCCC	11626	CCACCTCC	5248	CCCGCGCCC	1199
TCAT	110028	CCGAA	41055	TCCCAC	14898	CCGCCCT	11624	CCGACCCC	5170	CCCCGCCAC	1197
CTTG	109723	ACCAT	41004	ACACCT	14865	CACCTCC	11579	CACCACCC	5142	CCCCCGCCA	1197
AATC	109613	TCCAA	40905	CTCCAC	14843	GCCCCCA	11557	CCTCTCCC	5135	CGCCCCCCA	1195
TGCT	109408	ATCAC	40831	GCCCCG	14824	CCACTCC	11455	TCCCCCGC	5120	CCCCCCCAG	1195
TATA	109291	CCAGC	40559	CCCTAC	14798	GCACCCC	11405	CACCCCCA	5117	ACCCCCCAC	1190
TTTA	108967	GCCAA	40532	ATCCCC	14796	CCACCGC	11386	GCCCACCC	5111	CCCCACACC	1188
CTGT	108391	CCAAT	40531	CCCCGG	14771	CCCCATC	11353	CCTCCCCT	5109	CCCCCAGCC	1187
CAGA	107676	GACCA	40499	ACACAA	14673	CACCCGC	11328	CCCAACCC	5092	CGCCCCCAC	1186
TGTC	107610	TAACC	40428	CCACTA	14600	CCCCACG	11312	GCCCCCGC	5078	CCCCACCGC	1185
ACGA	105384	ACCTA	40417	ACAACA	14507	CACCCCT	11303	CCGCCCCA	5062	CCCCGCCCA	1179
ACGT	104581	GCCGC	40324	CACAAC	14456	CCGCCGC	11278	CCATCCCC	5046	TCCCCCGCC	1174
CGTA	104525	CCATA	40183	ACCGCC	14405	ACCTCCC	11276	CCCTACCC	5042	CGCCCGCCC	1174
ACTG	104490	TCCCT	40161	CTACAC	14391	CCCACCG	11275	CCCCCGAC	5039	GCCCCCCGG	1161
GACT	104168	CCTTC	39945	CCTCCT	14371	GCCCCGC	11266	CCTGCCCC	4991	CCCACCCCA	1153
CAGT	103424	GCCTC	39804	CCTCCG	14293	CTCCACC	11253	CCCCCACT	4965	CCCGCCACC	1153
TCGA	103155	AGCAC	39802	GGCCCC	14246	AGCCCCC	11177	CCGCCCGC	4956	CCCCACCCA	1152
TCTG	103073	CTTAC	39802	ACCCTA	14212	CCATCCC	11161	GCCCTCCC	4933	CCGCCACCC	1152
TTTT	102939	CACAG	39749	CCCTGC	14204	CCCCGGC	11157	GCTCCCCC	4923	CCCACCCCG	1149
TTAA	102758	CCCGT	39720	CCGCAC	14183	CCCGCGC	11119	CCTCCACC	4894	CCCCCCTCA	1147
CAGG	102374	AAACC	39706	ACCAAC	14148	CCCCCTT	11102	CCCCCTCA	4894	CCCCCCAAC	1141
AGCA	101697	CGCAA	39564	CTACCA	14093	ACCCCCT	11101	CCCCAACC	4841	CCCCGGCCC	1140
TATT	101663	GGCAC	39507	CCTGCC	14091	ACCCTCC	11094	CCCCCTTC	4837	CCCCCCACG	1139
GCTC	101542	CTCTC	39490	CCCTAA	14053	CCTTCCC	11093	CCACCCCG	4830	CCCCCCAGC	1136
ATGC	101479	CATAA	39409	AACCAC	13995	TTCCCCC	11073	GCGCCCCC	4829	ACCCCCCGC	1128
GTAC	100975	CACGA	39373	CAACAA	13983	ACCCGCC	11055	CCCTCCGC	4828	CCCCCCGCT	1126
ATTA	100739	CTGAC	39265	CACACT	13961	ACTCCCC	11020	GCCCGCCC	4823	GCCCCCGGC	1126
AACG	100708	CCGGC	39193	CCCTTC	13933	CCGCCTC	10999	GCCCCCCA	4820	CCCCCCCAA	1123
ACAG	100204	CTAAA	39160	TCCACC	13910	CATCCCC	10986	CCTCGCCC	4817	CCCCCCTAC	1120
GTCA	100097	TACAA	39157	CCCATA	13877	CTCGCCC	10972	CCCGACCC	4792	CCCCACCAC	1120
AATA	100066	ACGAC	39106	CTCCCG	13859	CCCCGCA	10942	CGCCCCAC	4791	CACCCCGCC	1119
TAAA	100008	CGAAC	38916	ACGCCC	13834	CCGTCCC	10920	CCCCGCGC	4783	CCTCCCCCA	1117
GTCT	98703	ACACT	38498	AACACA	13793	ATCCCCC	10917	CTCCCCTC	4779	CACCCCCAC	1116
ATAA	98360	CGACA	38247	CTCACA	13786	TCCCCAC	10917	TCGCCCCC	4729	CCCCCACCG	1113
GTTC	97620	ATCCA	37938	CTCCCT	13769	CCCAGCC	10897	TCCCGCCC	4720	CCCCGCCCG	1111
AGAC	97583	TCACA	37856	CCACAT	13764	CCCCTTC	10890	CCACCGCC	4708	CGCCCACCC	1110
AGCT	97513	CATCA	37812	CCCTCT	13734	CCCGCCT	10866	CCCCTCCT	4690	CCACCCGCC	1106
GCTA	97210	CCCGG	37792	CCATAC	13727	CCCCTGC	10864	CCAGCCCC	4681	CCCGCCCCT	1102
TGCG	96981	TCCGC	37711	TTCCCC	13706	CGCCGCC	10863	CTACCCCC	4671	CCCACCCAC	1099
CTGG	96866	TCCTC	37575	CCTTCC	13692	CTCCGCC	10857	CCCTTCCC	4665	CACCCCCCA	1099
TCGT	96604	CCTCT	37490	CAGCCC	13690	CTCCCCT	10849	TCCCCCCT	4647	TCCCCCCGC	1098
TTAT	96357	AAACA	37476	CCCGGC	13610	CCCCCAT	10802	CCCCGCCA	4622	CCGCCCCTC	1098
CTAG	96133	AGACC	37466	TCCCCG	13592	CACCCCG	10780	GCCCCACC	4619	CGCCCCACC	1096
ATTT	96030	GCACA	37427	CCAACT	13591	CCCCAGC	10736	CCCCGCTC	4604	CCCCCGCAC	1095
GCTT	95659	GAACC	37345	TCCCCT	13558	CCACCCG	10726	GCCACCCC	4593	CTGCCCCCC	1094
TAGC	95288	CCTAT	37343	ACCACT	13549	CCCCCGA	10716	CCCGCCCA	4593	CCCCCCCTA	1094
CGAT	94826	CAATC	37198	CCCCGT	13528	CCTCCCT	10627	CACCTCCC	4591	ACCCCCCTC	1094
CAAG	94677	GGACC	37151	CCACAG	13523	ACCCCGC	10607	TCCTCCCC	4583	CCCACCCGC	1093
ATAT	94119	AACCT	37040	AGCCCC	13506	CTCCCTC	10587	CCCTGCCC	4575	GGCGCCCCC	1093
TAAT	94058	ACATC	36977	CACACG	13491	TCCCCCA	10577	TCCCCACC	4573	CCACCCCGC	1092
GGCA	93769	CAACT	36951	CCCGCG	13460	CGCCCCT	10524	CCCTCACC	4558	CCCGCCCTC	1089
TTCG	93726	ACCGA	36868	CCACGA	13404	CCCGCCG	10511	CAACCCCC	4550	CGACCCCCC	1086
GAAC	93121	TCTCC	36842	CAAACA	13383	CCCTTCC	10500	CCCGCCTC	4544	CCCACCGCC	1084
CGAA	92984	TTACC	36828	CACTAC	13381	TCCGCCC	10492	CACCCACC	4542	GTCCCCCCC	1083
GATC	92808	TGCAC	36802	CCAAAC	13379	TCACCCC	10489	ACCCCGCC	4541	CGCCACCCC	1082
AATT	92534	AAAAA	36788	CCATCA	13370	CCTCCTC	10472	CCGCACCC	4531	CCCCGCACC	1079
CGTG	92385	GACAA	36758	CCCTCG	13368	GCCCCTC	10469	CCCATCCC	4522	CCTCCCCGC	1078
ACGG	92159	CTCCG	36754	CCTCTC	13356	CTTCCCC	10460	CCCGCCGC	4518	ACCCCCACC	1072
ATCG	91974	GCCCG	36737	CCTCAA	13348	CCCATCC	10441	CCCCACCG	4516	GGCCCCCGC	1071
CGGG	91911	CCAAG	36661	TACCCA	13313	CTCTCCC	10422	CACCCCGC	4510	CAGCCCCCC	1071
AGTC	91724	TTCAC	36541	CTAACC	13298	CCTCGCC	10419	CCCCCCTG	4506	ACCCCACCC	1068
TTGA	91511	TCCCG	36491	ACACCG	13292	CGCCCTC	10413	CCGCGCCC	4500	CTCCCCGCC	1064
AAAA	91479	TCAAC	36380	GCCCCT	13284	CCCTACC	10409	CCTTCCCC	4474	CCTCCCGCC	1062
CGGA	90934	GCAAC	36249	TGCCCC	13245	GCCCGCC	10408	ACCCCCCG	4435	GCGCCCCGC	1061
GTGC	90902	ATAAC	36244	CAAACC	13232	CCGCCCG	10355	CCCTCCCT	4434	ACCTCCCCC	1059
GGAC	90794	CTCGC	36207	AAACCC	13182	CCCCTCT	10292	TCCCACCC	4410	TCCGCCCCC	1059
GGCT	90137	AGCCA	36176	CACTCA	13113	CTCCCGC	10267	CCCACCCG	4390	CCCCTCCCA	1058
TCAG	89919	AACAT	36128	CAACCT	13107	GCCTCCC	10258	CCCCGACC	4378	CCCCCGACC	1057
GCAT	89456	TGACC	36050	ACTACC	13101	TCCCACC	10252	TCCACCCC	4377	ACCCCGCCC	1055
TGTA	89300	AACTC	36033	ACACTC	13084	CCCTCCT	10224	CCCCCCGT	4376	CCCCTCCGC	1052
AAGC	89237	GTCAC	35988	ACCTCA	13083	CCTCCGC	10221	CCCACTCC	4355	CCCTCCCCA	1052
GCAA	88721	CCGCG	35872	CATACC	13080	CCCCCTG	10221	GCCCCCCT	4345	CCCCCTCCA	1051
GACG	88698	ACTAA	35633	CTGCCC	13060	CCCTCTC	10202	TCCGCCCC	4332	CACCCCCGC	1050
CGGT	88278	ACAGC	35628	CCAACG	13045	CGCCCCG	10188	TACCCCCC	4322	CCCTGCCCC	1046
GGTC	88123	CACTT	35599	CCTAAC	12961	CCCCGTC	10172	CCCCCCAG	4312	GGCCGCCCC	1040
TTTG	86822	CTCAT	35598	ACCCAT	12954	CTCCTCC	10095	AACCCCCC	4298	CCCCCCCGT	1040
CGTT	86795	TCGCC	35597	AACCCT	12937	CGCCTCC	10066	CTTCCCCC	4293	CCCTCCGCC	1038
TCGG	86747	CGCCG	35594	CCTCGC	12934	CCTCTCC	10005	CGACCCCC	4281	TCCCCCCCA	1037
AAAT	86746	CAGCA	35494	GACCCA	12907	TCGCCCC	9998	CCGCCACC	4270	CCCCTCCAC	1032
TTGT	86722	CAAGC	35438	ACCTAC	12836	ACCCCCG	9985	CACTCCCC	4218	CTCCCCCGC	1030
ATGA	86496	GGCCA	35381	GCCACA	12754	CGCCCGC	9982	CGCCCCGC	4214	CCCCCCCTG	1030
GCGA	85749	TAACA	35373	TCCCTC	12750	TCCCCTC	9927	CCCCCAGC	4214	CCACCCCAC	1029
TATG	85513	CGCGC	35337	CACCGA	12744	CTCCCCG	9893	GCCGCCCC	4212	CCCCCACTC	1028
GCGT	85008	GGGCC	35309	CTCCGC	12711	GCCCCCT	9879	CCCCTACC	4207	GCCCCGGCC	1028
AGCG	84715	CGTCC	35308	CTCCTC	12694	TCCCGCC	9872	CTCCCCCA	4203	GGGGCCCCC	1026
TAGA	83738	CGCCT	35276	TCACCA	12693	GCCCCCG	9846	CCCCCTGC	4168	CGCCCCCTC	1025
GCTG	82941	CCTTA	35270	ACACGC	12676	CCCCCGG	9737	CCCACGCC	4159	CCCCTCGCC	1025
GGCG	82841	CAAAT	35223	CTCTCC	12670	CCGCTCC	9734	CCCCCACG	4142	GCCCCCGCG	1022
TGAA	82816	ATACA	35198	TACACC	12662	CCTCCCG	9725	CACCGCCC	4139	CCCCCTCAC	1018
ATGT	82400	AATAC	35185	CCAAAA	12597	CCCTCCG	9708	CACCCCCT	4120	ACCCCCCCG	1017
TGTT	81680	GTACC	35024	ACCACG	12578	CCCCCAG	9692	CCGGCCCC	4117	TCGCCCCCC	1012
GGGA	80347	AATCC	34976	CACCAT	12571	GCTCCCC	9678	CCTCCCCG	4106	CCGCACCCC	1011
GTTA	80193	ATCAA	34937	ATACCC	12526	CCCTCGC	9658	CCGCCCCT	4096	GCGCCCCCG	1007
TGAT	80176	CGGAC	34858	GACACC	12521	CCCCGCT	9597	CCCCCCGG	4036	ACCCTCCCC	1006
CGGC	80014	CCGTC	34842	GCACCA	12517	CCCGCTC	9583	CCCAGCCC	4023	ACACCCCCC	1002
ATTG	79812	CGTAC	34780	ACTCCA	12510	CCCGTCC	9553	CTCCCCGC	4020	CCCGCACCC	1000
CGAG	79715	ACGCA	34778	ACATCC	12485	CGTCCCC	9526	CCCCGCCT	4017	CCCTCCCGC	1000
GATA	79133	ACACG	34746	CTTCCC	12479	TCCTCCC	9518	ATCCCCCC	4013	CGCACCCCC	997
AGTA	78739	ACTCA	34704	CACAAA	12459	TCCCCGC	9479	CCCCCTCT	4012	CCCCCCTTC	996
TAGT	78696	CCGAT	34694	CAACCG	12432	TCTCCCC	9468	CGCCCCTC	4009	AGGCCCCCC	995
AATG	78415	TACCT	34675	CACATC	12428	GCCCTCC	9465	GCCCCGCC	3993	CCCTCCCCG	994
GTCG	78023	CGGCC	34593	GCGCCC	12415	TCCCCCT	9420	GCCTCCCC	3990	CACGCCCCC	992
TGGC	77538	GCGAC	34543	ACTACA	12382	TCCCTCC	9388	CCTCCTCC	3988	CCGGGCCCC	992
AAGA	77365	AACGC	34491	GCACAC	12367	CCCCGCG	9378	CCCCCGTC	3979	CCCCCCACT	991
GTTT	77338	CAATA	34475	GACCAC	12365	TCCACCC	9358	CGGCCCCC	3974	TCCCCCCCG	989
GAGC	77226	ACAAT	34461	TCCCGC	12323	CCCCCGT	9306	TGCCCCCC	3961	CCCTCCCAC	989
TGGA	76681	CCAGA	34381	CGACCA	12317	CGCTCCC	9219	TCCCCTCC	3950	CTCCCCCCA	988
GCGG	76033	CAGGC	34337	CGCCCT	12309	CCCCTCG	9165	CCCCTTCC	3929	CCACCCCCA	986
AAGT	74678	CTCTA	34282	ACCCGA	12309	TCCCCCG	8967	CTGCCCCC	3926	ACCACCCCC	985
TTAG	74589	CTGCA	34192	ACACTA	12292	GGGCCCC	8683	CCCCCGGC	3925	GGCCCCCCG	982
TGTG	74472	TCCAT	34144	CTAACA	12286	CACACAC	8295	CATCCCCC	3922	CCCCCTCCG	981
GATT	74212	GCTCC	34103	CCCTTA	12284	CCACACA	8127	CTCACCCC	3890	CCCAGCCCC	981
TAAG	74210	ACATA	34083	GCCCGC	12255	CACACCA	7995	CCCCGGCC	3877	GCGGCCCCC	977
GTAA	73910	ACCTT	33969	TCACAC	12234	CCTACAC	7820	AGCCCCCC	3858	CCCACCACC	975
GCAG	73658	ATGCC	33937	ACCAAA	12232	CCAACAC	7642	CCGCCCCG	3848	ACCCCTCCC	975
AGTT	73195	CCTGA	33915	CCGCCG	12206	CCCAACA	7602	CCCGGCCC	3840	CCCCCCTCG	975
AGAA	72928	AAGCC	33881	ACACAT	12202	CACCACA	7589	CTCCTCCC	3829	ACCCCCCCT	975
GTAT	72521	GCCAT	33862	CTCCAA	12197	ACCACAC	7517	GCCCCTCC	3822	ACCCCCTCC	975
TTGG	72299	TCTAC	33846	TCTCCC	12183	ACCCACA	7458	CCTCCGCC	3815	CGCCCCCCT	973
TGGT	71765	CTTAA	33734	CGCGCC	12168	ACACCAC	7380	CACGCCCC	3761	CACCCACCC	972
GTGA	71492	CTATC	33679	GCCTCC	12121	CTACACC	7340	CCCGCCCT	3733	CCCCCCATC	972
ATAG	71296	GACCT	33605	CGCCCG	12104	CCGACAC	7285	CCCCGCCG	3729	CCTCCCCCG	970
GGGT	71155	CCATT	33583	CACAGC	12073	ACACACC	7220	CGCCACCC	3727	CCCCACCTC	967
AGAT	70519	TGCCA	33578	CCCAAG	12072	CACACCT	7206	CCCCTCCG	3727	CACCCCACC	967
GGGC	70202	CCGCT	33576	CAACGC	12057	CCACAAC	7179	CGCCCCCA	3710	GCGCCCGCC	967
GAAA	69439	CGCTC	33546	CGCACA	12052	CTCACAC	7118	CTCCGCCC	3705	CCCACCCTC	966
GTGT	69294	CTTCA	33444	CAACTC	12051	ACACCCA	7110	CCCCTGCC	3681	TCCCCCCAC	963
GGTA	69251	CAGAA	33326	CACGAC	12047	CACCTAC	7083	CTCCACCC	3653	CCCCCACCT	960
TAGG	69121	CAACG	33325	CCGACA	12038	CACCCAA	7075	GCCCCCCG	3649	CACCCGCCC	960
AGGA	68418	CATGC	33298	GCTCCC	12011	CTGACCC	7070	CCGCTCCC	3648	CTCCCCCAC	957
AGGC	68359	TAAAC	33293	TCCTCC	12006	CCTCACA	7052	TCCCCGCC	3635	CCGCCTCCC	957
AAAG	67532	TCAAA	33232	GCCGCC	11989	CCCACAA	7048	GACCCCCC	3626	CGCCCCTCC	955
ATGG	67498	CACGT	33073	GCCCTC	11988	CACTACC	7011	GGCCCCCC	3618	CCTCCCCAC	952
GAAT	67220	TACTC	32990	CATACA	11982	CACCCTA	7000	CCCCATCC	3607	CCCCCTCGC	952
GGTT	66236	CGAAA	32988	CACGCA	11977	CAACACC	6967	TCCCCCCG	3583	CCCCACCCG	950
TGGG	65868	AACCG	32981	CCGCCT	11929	CACCAAC	6961	CCCTCCCG	3583	CCGCCCTCC	945
AGGT	65691	CCTAG	32973	CATCAC	11925	ACCCAAC	6932	CCCGCACC	3582	CCCCCGGGC	942
AGTG	65059	GCCTA	32920	CCCAAT	11912	CTACCAC	6931	CCCGTCCC	3577	CCCCCGCCT	939
TGAG	64852	GCTAC	32893	CATCCA	11896	GTCCCCC	6928	CGCCGCCC	3577	CCGCCCCCT	939
GTTG	64604	CATTC	32859	AAACAC	11892	CCACCTA	6924	CCCCCGCA	3565	GCCCCCGAC	938
AAGG	63734	CTACT	32777	CTACAA	11881	CTACCCA	6892	CACCCTCC	3557	CCCCCTACC	937
GATG	63714	GTCCA	32624	CCCAGA	11870	CCTACCA	6857	CCGCCGCC	3534	TCCCCGCCC	936
GAGA	63175	AACTA	32552	CGACAC	11863	CCCTAAC	6855	CTCCCCCT	3530	CCCCCAACC	936
GGAT	63054	ATAAA	32550	TACCAC	11862	CCCAAAC	6851	CTCCCACC	3517	CCCCCCTCT	935
AGGG	62348	GACGC	32500	CCCGCT	11850	CCACACT	6840	CCGTCCCC	3504	CCACCGCCC	933
GGAA	61408	TCGAC	32349	CCACTT	11802	CACGACC	6836	CGCCCACC	3494	CGGCCCCGC	931
GAGT	60885	CCGAG	32242	ACCCTT	11799	CAACCAC	6832	CAGCCCCC	3462	CACACCCCC	929
GGTG	60084	CACTG	32182	CTCGCC	11744	AACACCC	6825	CCCTCTCC	3454	CGCCCTCCC	928
GGGG	59605	GGGAC	32178	TCCCAA	11742	CCCTACA	6788	CGCACCCC	3386	GGCCCCCAC	928
GTGG	57979	TCCTA	32168	CCAATC	11729	ACCACCA	6764	CCCGCCCG	3327	CCTCCGCCC	926
AGAG	56929	TATCC	32142	CGCCGC	11717	CACACTC	6729	CACCCCCG	3316	CGGCCCCCG	926
GTAG	55640	ATCCT	32088	CCTTAC	11641	CCAACCA	6699	CTCTCCCC	3287	CCCCTGCCC	925
GAAG	53659	ATTCC	32085	CTACCT	11632	CCGGGCC	6687	CCCTCGCC	3270	CCACCCACC	924
GAGG	53520	CGCAT	32037	CCAAGC	11629	CCTCAAC	6682	CGCGCCCC	3259	GGCCCGCCC	923
GGAG	51011	TATAC	32026	CCATAA	11622	CGGGCCC	6681	CCCCAGCC	3251	CCCCACTCC	921
		TACGC	32020	ACAAAA	11617	CAACCCA	6668	CGCCTCCC	3213	GCCGCCGCC	920
		CCTCG	31971	CCACTG	11602	CCGCACA	6666	CACCCGCC	3174	CCCTACCCC	920
		TTAAC	31941	CACATA	11590	CATACCC	6647	CGCCCCCT	3170	CACCCCCCG	920
		CCGTA	31823	ATCCCA	11582	CCGACCA	6636	CCGCCTCC	3131	CCCGCCTCC	919
		CCGGA	31818	CACCTT	11580	CACTCAC	6631	CCCCCTCG	3116	CCCCACCCT	919
		GACTC	31809	ACTCAC	11574	CACAACC	6623	GTCCCCCC	3102	ACTCCCCCC	916
		TTCCA	31657	AACCTC	11554	AACCCCA	6619	CCCCGTCC	3066	CCCCCCCAT	916
		AATAA	31644	AACCAA	11550	CACGCCA	6618	CCCGCGCC	3029	AGGGCCCCC	915
		AAGAC	31611	CCTCTA	11519	CCACTAC	6610	CTCGCCCC	3020	CCGACCCCC	912
		TAAAA	31566	CCCTGA	11482	ACCCCTA	6576	CTCCCTCC	2993	CCCCGCCTC	911
		TACAT	31417	CCGCGC	11474	CTGGCCC	6574	CGCCCCCG	2992	CCACGCCCC	911
		CTGAA	31379	CCTTCA	11444	ACTACCC	6554	CGCCCGCC	2905	GCCGCCCGC	911
		ACGAA	31327	CGCCTC	11442	CCCACTA	6553	CCCCCGCG	2903	CACCGCCCC	909
		AGGCC	31303	CCAGCA	11428	ACCCTAC	6544	CTCCCCCG	2866	CCACACCCC	908
		GCCGA	31283	CCTACG	11427	CACCACT	6534	ACACCCAC	2853	CGCCTCCCC	906
		CTCAG	31245	CTCAAC	11418	ACGACCC	6533	CCCCCGCT	2793	CGGCCCGCC	905
		CTCGA	31162	CAACTA	11418	ACCCCAA	6520	CGCTCCCC	2745	CCCGTCCCC	904
		AACAG	31158	CCACGG	11415	CCCCATA	6518	CTCCCGCC	2741	GGCCCCACC	904
		AGCAA	31150	TAACCC	11401	AACCCAC	6508	CCCGCTCC	2609	CGCTCCCCC	902
		GGCGC	31113	CCAGAC	11399	CCTGACC	6506	CCACACAC	2507	CCCAACCCC	902
		GTGCC	31105	CCTACT	11396	CAGGCCC	6503	ACCCACAC	2495	CCCTCCACC	899
		GAACA	31075	ACCATC	11379	ACCTACC	6501	CGCCCTCC	2450	GCGCGCCCC	894
		CTAAT	31023	CCGGCC	11356	CGACCAC	6500	ACACCCTC	2312	GCCCGCCGC	894
		GAGCC	31007	GCCCAA	11346	CTAACCC	6495	ACACACCC	2221	CCCACGCCC	894
		ATGAC	30987	CAATCC	11338	CCCACAT	6475	ACTCCCAC	2220	CTCCCCCCG	894
		ACCAG	30982	TCAACC	11336	GACCCAC	6468	ACACCCCA	2200	TACCCCCCC	893
		GCAAA	30982	CACCAG	11322	CCACGAC	6468	TTCCCCCC	2178	GCCCCCGCA	892
		TTACA	30976	ACCGCA	11320	CCCGACA	6460	CGTCCCCC	2171	ACCCGCCCC	892
		CTAGC	30956	CTACCG	11296	ACCACCT	6458	AAAAAAAA	2138	TCCCCCACC	891
		CGCTA	30948	ACATCA	11262	CAGACCC	6455	ACCCTCAC	2082	CCCCGCCCT	891
		GACCG	30891	AACCCG	11261	CTGCCCA	6444	ACCCCCAA	2021	TCCCGCCCC	890
		CATAT	30801	CAACAT	11250	ACACCTC	6441	TCACCCAC	2010	CCCCTCCCG	890
		CTATA	30794	TCCGCC	11209	CGCCACA	6426	ACCACCAC	1999	CCCCAGCCC	889
		ACTTC	30783	ACCTAA	11207	TACCCCA	6424	CCACCCAA	1954	CCCCTCACC	889
		AGACA	30738	ATCACC	11199	CTCACCA	6422	CCTCACAC	1936	GCGCCCCCA	885
		CGGGC	30735	CACCTG	11197	CTGCCAC	6420	ACCCCAAC	1908	CCGCCCCGG	885
		ATTAC	30721	CCCATG	11195	GACCCCA	6409	CCAACCAC	1908	CACCACCCC	884
		CCATG	30684	ACCGAC	11184	CACTCCA	6403	CCACTCAC	1907	GCCCCGCGC	881
		TACCG	30655	CGGCCC	11173	CGCACAC	6398	CCACACTC	1888	GCCGCCCAC	878
		TTGCC	30642	CACTAA	11157	CCTACCT	6388	CCACCAAC	1879	GCGCCCCAC	878
		GATCC	30615	AAACCA	11156	ACAACCC	6386	ACACCACC	1869	CACCCCTCC	876
		TTCAA	30602	TTACCC	11152	CCCATAC	6378	ACTCCCTC	1865	CCCCCCCCC	876
		ATCTC	30579	CCCATT	11137	ACACCCT	6371	ACACCCCT	1854	CCCCGACCC	875
		ACCTG	30569	AACTCC	11135	ACGCCAC	6355	CCACACCA	1835	CCCCCTTCC	874
		CAGTC	30470	ACGCCA	11104	CTCCACA	6347	ACCCACTC	1823	CCCTCCCTC	867
		AGAAC	30447	TACACA	11079	TACCCAC	6343	ACAACCCC	1814	GGCCCCCCA	867
		CGATC	30428	CCAATA	11064	CACCGAC	6336	ACCCCCTA	1814	GCCCGCGCC	867
		ACCGT	30414	CCCGTC	11053	CCGACCT	6333	CCACCCTA	1798	CGCCCCCGG	865
		TAGCC	30406	TACCCT	11053	CCTGCAC	6326	ACCCCACA	1794	CCCTCCCCT	862
		GAAAC	30368	AACAAC	11041	CCATCAC	6321	CCCAACAC	1764	CACCCCCCT	861
		CGCGA	30355	ACCCAG	11037	GACACCC	6321	AATAAAAA	1764	GGCCCACCC	859
		GCCAG	30340	CTTACC	11033	GCCACAC	6320	ACACTCCC	1751	CCACCCCTC	858
		TCCGA	30313	ACATAC	11020	CACGCAC	6320	ACCACCCA	1745	CCCCCGCTC	858
		AAAAC	30301	GCAACC	11019	TACACCC	6314	CCACCACA	1742	CACCCCCTC	856
		ACAGA	30264	ACACGA	10958	CTGCACC	6310	CCCCACAA	1741	CCCCCCAGG	855
		CAAAG	30250	AACACT	10950	CCATACC	6310	AAATAAAA	1739	GCCGCCCCA	855
		GATAC	30152	CCCAGG	10938	CACCCTT	6307	ACCCACCA	1739	ATCCCCCCC	855
		ACAAG	30139	CCTGCA	10934	CACGGCC	6306	ACGCCCAC	1725	GCCGCCCCG	852
		GACAT	30030	CTACTC	10934	CGACACC	6294	ACTCCCCA	1721	CTCCCGCCC	852
		ACTGC	29997	ACCCTG	10915	CACCCAT	6287	CACCACAC	1707	TCCTCCCCC	851
		CTACG	29950	ACAAAC	10906	CAGCCAC	6286	AAAAAATA	1687	GCGCCCACC	851
		AGCCT	29685	CCCTAT	10899	CCTTACC	6283	ATAAAAAA	1679	CCTCCACCC	849
		CAAGA	29682	ATACCA	10892	CCCACTT	6276	ACTACCCC	1673	GCCCCCGGG	848
		AAACT	29557	CTACGC	10880	CTTACCC	6266	CACACCAC	1666	AACCCCCCC	846
		TCCAG	29523	CCTAAA	10865	CCACATC	6265	AAAAATAA	1666	TCACCCCCC	846
		TCACT	29489	ACAGCC	10841	ACCTCAC	6261	TCACCCTC	1660	GCGCCGCCC	845
		GCGCA	29438	CCATGC	10833	AACCACC	6255	CCACCCAT	1653	CTCCCACCC	845
		AACGA	29410	ACAACT	10801	ACCAACC	6254	ACCACCTC	1649	CCCCCTCTC	845
		AGCGC	29400	ACGACC	10796	ACGCCCA	6253	TAAAAAAA	1646	CCTCCCCTC	844
		CATCT	29399	CACTTC	10787	CCAACCT	6243	ACCCCTAC	1643	CACCCTCCC	844
		CGAGC	29376	CTCACT	10783	CCTAACC	6235	ACCCCCAT	1640	CGGCCCCCA	843
		GCACT	29363	AAACAA	10778	CGACCCA	6210	ACACCCGC	1639	GCCCCCCGA	842
		AATCA	29347	CGCCAA	10771	CCACCAA	6197	TCACACCC	1632	GCCCCCACA	840
		AGTCC	29307	CCCGAA	10744	CCAGGCC	6191	ACTCACCC	1617	CCCCCATCC	839
		GGTCC	29236	GACACA	10730	CCCTGAC	6189	TCACCCCA	1611	CCACCACCC	838
		CTGGC	29192	CTCCTA	10727	GACCACC	6187	CCTACCAC	1610	CCCGCCCGG	838
		TGAAC	29178	CGTCCC	10720	CACCTCA	6184	ACCCTCTC	1601	GGCCCCCTC	837
		CATTA	29160	ACCATA	10718	CCCAACT	6177	ACCACACC	1600	CCCCCGTCC	836
		CTTGC	29110	CCAGGC	10711	CTACCCT	6176	CCCCACTA	1586	CCACCCCCG	836
		AAAAT	29101	ACTCCT	10706	CCGGCCA	6159	CCACCTAC	1585	CCTCGCCCC	835
		AAATC	29087	CAAGCC	10700	CTCCAAC	6158	AAAATAAA	1582	CCCCTCCTC	834
		CCGGG	29055	CCTGAC	10644	CCACTCA	6158	AACCCCAC	1581	CCCCTCTCC	834
		TACTA	29049	GAACCC	10641	CACACGC	6152	CCACACCT	1580	CTTCCCCCC	834
		GTAAC	29031	GACCCT	10637	CCCTTAC	6150	CCAACCCA	1573	GGCCACCCC	829
		GCATC	28996	ACCTCT	10627	ACCGACC	6147	ACCTCCAC	1571	CTCCGCCCC	828
		GTCAA	28919	TCACCT	10625	GGCGCCC	6142	CCCTACAC	1567	TCCCTCCCC	827
		TCATC	28901	ACACAG	10621	CCACCTT	6126	CCACCCTT	1566	CCTGCCCCC	827
		GGAAC	28889	CACTGC	10613	CCACACG	6124	TCTCCCAC	1561	TCCCCCCCT	826
		AAATA	28849	CCACGT	10608	CCTTCAC	6124	CCCACCAA	1557	CCCCCCCTT	826
		CACGG	28799	CCCTAG	10605	CGGCACC	6123	AAAAAAAT	1550	CTCGCCCCC	824
		TCTAA	28790	GGGCCC	10603	CCCACGA	6117	ACCCTCCA	1543	GCCCCCCAG	824
		GGCCT	28787	TCAACA	10583	GGCACCC	6114	CAACCCAC	1535	GCCGGCCCC	824
		CGCAG	28767	AATCCC	10567	CTTGCCC	6107	CCACTCTC	1533	TCCCCCTCC	822
		TTTCC	28699	GCACCT	10564	GCCCACA	6100	CCACACGC	1532	TCCCCACCC	821
		CGTCA	28656	TACCCG	10562	ACCACTC	6096	CCAACCTC	1531	CTACCCCCC	821
		TTAAA	28561	TCCACA	10547	CTCTACC	6096	ACCCGCAC	1527	CCACCCTCC	820
		TGACA	28517	CAAAAA	10545	CCTACTC	6090	CCCACAAC	1526	CACCTCCCC	819
		ATCCG	28477	TCCCTA	10541	ATACCCC	6089	ACCCACCT	1523	GGGCCCCGC	818
		ACGGC	28467	CCTATC	10530	GGCCACC	6088	ACCCCCTT	1519	CCCCGCTCC	817
		TGCAA	28447	AACCGC	10527	CAGCACC	6084	ACCCACGC	1519	CCCGCTCCC	817
		TAGAC	28387	CGCTCC	10518	CCAGACC	6070	CCCACCTA	1517	GCCCACGCC	815
		GATAA	28386	CCATCT	10512	CTCACCT	6069	CCTCCCAA	1511	CCCTCACCC	814
		ATCGC	28375	AGACCC	10496	GGCCCAC	6055	TCCCTCAC	1508	CCCCTTCCC	810
		GGCAA	28371	AGCCCA	10491	ACCCACT	6048	ACTCCCCT	1503	CCTCCCACC	810
		TCTCA	28333	CAACAG	10478	CCGCCTA	6046	CCAACACC	1497	TCCCCCCTC	809
		GTACA	28328	CCATTC	10464	CAGCCCA	6042	CCTCTCAC	1492	GCCCCCTGC	808
		GTTCC	28263	AAAACA	10463	CACACCG	6039	CCCACACA	1490	GGGCCCCCG	808
		CGTAA	28256	CCTCAT	10454	TGGCCCC	6039	CCCCACAT	1474	CCCACACCC	806
		CTCTT	28244	CCGTCC	10449	CCTGCCA	6026	CCCCAAAC	1473	GGCCCCTCC	806
		CGACG	28236	AACAAA	10445	CAACCCT	6022	CCATCCAC	1471	GCTGCCCCC	806
		CAGAT	28217	CAGCCA	10430	CATGCCC	6020	CCTCCAAC	1468	CGCCCCGCG	805
		TTTAC	28212	ATACAC	10422	CTTCACC	6017	GCCCACAC	1466	GCCGCGCCC	805
		TGGCC	28185	AACCTA	10419	CCGGCAC	6015	ACTTCCCC	1457	CCCACCTCC	804
		GGACA	28151	ACATAA	10404	CACAGCC	6011	CCCCTAAC	1456	GCCCCGCCG	803
		TTCCT	28148	CCTCGA	10386	CCCCAAA	6010	ACACCTCC	1447	GCCCCTGCC	802
		CCAGG	28137	CCGCTC	10371	CTCCCTA	6008	ACATCCCC	1443	GCCCCCCTA	800
		TATAA	28134	TAACCA	10368	CCCTCAA	6008	ACTCCCGC	1435	CCCGCCGGC	800
		ACTCT	28120	AACGCC	10366	AGGCCCC	5989	GCACCCAC	1433	GCCCCACAC	799
		CTGTC	28113	TCACAA	10342	CATCCCA	5989	CCTACCCA	1410	CCGCTCCCC	796
		GAAAA	28037	CACCGG	10338	GGCCCCA	5986	ACCACCCT	1405	CACTCCCCC	795
		GCCTT	28035	CACTCT	10332	ACTGCCC	5982	CCACCATC	1403	CGGCGCCCC	795
		ATCAT	28025	CTATCC	10326	CATCACC	5976	ACACGCCC	1401	CCCCGCCGG	794
		ACTAT	27987	CAGACC	10303	CACCCGA	5976	ACCCCCGA	1399	CGGCCGCCC	793
		AAGCA	27985	CTTCAC	10273	CCTGGCC	5976	CCTCACTC	1399	CCTCACCCC	793
		TCGCA	27945	TCGCCC	10260	TACCACC	5972	ACGACCCC	1398	CCCTTCCCC	790
		CAGCG	27922	GCCAAC	10246	ACCCCAT	5961	ACTCTCCC	1397	GCCCCCTAC	789
		CCTTT	27916	ACCAGC	10246	CCAGCAC	5961	ACTCCACC	1391	TGGCCCCCC	787
		CATGA	27843	CGAACC	10234	CGGACCC	5945	ACCCCATC	1386	TCTCCCCCC	787
		AGCCG	27824	ACCTTC	10218	CCTCTAC	5941	CCCCCAAA	1385	CCCCAACCC	786
		CGACT	27790	CAATCA	10212	CACCATC	5932	AAAAAAAC	1385	CTCCCCACC	785
		ACGTC	27759	CAATAC	10207	CCCCTAA	5930	CTACCCAC	1384	GCCCCAGCC	785
		CAATT	27756	ACCTGC	10206	CACTGCC	5930	CCACTCCA	1384	CCGGCCGCC	783
		AGGAC	27712	CTCACG	10204	CCATCCA	5928	TACCCCAC	1379	CCTCCCCCT	783
		CCTGT	27711	CCGCAA	10203	CCGGACC	5924	ACCAACCC	1379	CGGCCCCAC	780
		GACTA	27707	ATCCAC	10192	ACCCCTT	5922	TCTCCCTC	1374	GCCCCGCAC	779
		GAGAC	27704	CTGACC	10188	CCACCGA	5920	TCAACCCC	1366	GCCCCCACG	779
		ATCTA	27673	CATCAA	10178	CTCCCAA	5916	TCACTCCC	1364	GCCCCCGTC	778
		GCTAA	27670	TCACCG	10168	ATGCCCC	5916	ACGCCCTC	1361	CCCCGGGCC	778
		ACATT	27601	CCTCAG	10150	CCCTTCA	5911	CCTCACCA	1360	GCCCCCCTG	777
		TGCGC	27528	ACTTCC	10144	CCCCTTA	5910	CCCCAACA	1360	CCCCTCCCT	777
		CAGGA	27505	CACCGT	10133	CCAACTC	5909	CCCCTCAA	1359	CCACCTCCC	776
		GCAGC	27414	GGCCCA	10121	CAACCTC	5903	CCACAACC	1359	CCCCCCGGA	776
		TGCCT	27362	ACTCAA	10120	CCCGGGC	5903	CCAACCCT	1353	CGCCCCGGC	776
		TGTCC	27335	ACGCAC	10113	TTACCCC	5902	CCGACCAC	1352	CCCTCGCCC	775
		ACCGG	27334	ATCCCT	10110	CCGCAAC	5900	ATAAAATA	1352	GCGCCCCCT	773
		CGTGC	27330	ACAACG	10103	CCCAGAC	5892	CACCCCAA	1346	ACCCACCCC	771
		TTGAC	27320	TGACCC	10101	CACATCC	5888	ACCCAACC	1346	GCCCACCGC	771
		TACAG	27285	GCACCG	10094	CTCAACC	5886	CAACACCC	1344	GGCCTCCCC	771
		CTAGA	27279	TTCACC	10092	CTCGACC	5878	ACCCCACT	1344	CCCGGGCCC	769
		TAACT	27277	CTCTAC	10088	CCCTCTA	5878	ACTGCCCC	1342	GCGACCCCC	768
		GGCCG	27250	CAGCAC	10086	CCGACGC	5877	ACGCCCCA	1339	GCGCACCCC	767
		CGATA	27249	ACACTT	10082	CCACAGC	5877	CCTCCCTA	1335	CCCGGCGCC	767
		ATATC	27227	CCAAAT	10079	ACCGCCA	5870	AAACAAAA	1333	GCCCCACGC	767
		TCAGC	27132	ATCACA	10066	ACACTCC	5868	AATAAATA	1332	GCCCGCCCA	766
		AACTT	27123	CTCTCA	10058	ACCTCCA	5866	TCCCCCAA	1331	GCCACCGCC	766
		ACTTA	27122	AACTAC	10051	CCTCCAA	5858	ACCTACCC	1329	GCCGACCCC	765
		TCACG	27113	CCATCG	10047	CTGTCCC	5850	AATATAAA	1329	GCCCCCAGC	764
		ACGCG	27084	ACCAAT	10038	ACCGCAC	5846	ACCTCCCA	1328	CAACCCCCC	763
		TTCTC	27065	CCTAGC	10030	ACGCACC	5842	CACCTCAC	1323	CCGCCCGCG	763
		ATTAA	27058	CACGGC	10002	CACCTTC	5835	CCACGCAC	1323	CGGGGCCCC	763
		AGTAC	26958	AGCACC	10001	ACCCGAC	5829	CACCCAAC	1320	CTCCCCCTC	761
		GCACG	26955	TACCAA	9999	CCTACGC	5828	ATTAAAAA	1319	CCGCCCGGC	761
		ATACT	26905	CAACGA	9997	ATCCCCA	5826	CCCCCATA	1319	CCCGCCGAC	757
		CCTTG	26866	GACCCG	9972	ACCCATC	5824	AAAAAACA	1317	GGCACCCCC	756
		AGAAA	26838	AACACG	9963	CTACGCC	5822	CCACTACC	1316	CCCCCGGCG	756
		TCAAT	26835	TGCCCA	9958	ACTCCCA	5818	AAAACAAA	1313	CCCGCCGCG	756
		CCGGT	26783	CAAACT	9958	CCCATCA	5817	CCACCCGA	1313	CCCTCCTCC	755
		TACGA	26747	CCCTTG	9952	CAAACCC	5814	AATTAAAA	1312	CCAGCCCCC	755
		CGGCA	26744	GCTACC	9939	ACCCTCA	5810	CCCCACTT	1311	CTCACCCCC	754
		GTGAC	26719	TCTACC	9938	TACGCCC	5802	GCACCCTC	1308	CCCACCCCT	754
		GTCCT	26705	CGACCT	9937	CTCCTAC	5800	AAATAATA	1307	CTCCCTCCC	753
		CAGTA	26635	CATGCC	9934	ACACGCC	5800	TCACCCCT	1306	GCCACCCGC	751
		ACGAT	26557	TCCAAC	9930	GCACCAC	5795	ACCGCCAC	1305	CATCCCCCC	750
		CTTAT	26547	ATAACC	9928	CCTCCTA	5794	AACCCCTC	1304	CCCACTCCC	750
		CCAGT	26544	GCCACT	9923	GCGCCAC	5794	CCACCACT	1304	CCCCCGCGG	748
		AAAGC	26504	GCCACG	9891	CACGCCT	5794	ACAAAAAA	1302	GCCCACCCA	746
		CCGTT	26493	ACTAAC	9887	ACTCCAC	5791	GCTCCCAC	1300	TCCCCTCCC	746
		GACAG	26448	CATAAC	9852	GCGACCC	5788	CCACCGAC	1296	CCCCCCTGG	745
		TAATC	26417	CTACTA	9843	CGCACCA	5788	CCCATCAC	1295	CCACCCCCT	744
		ATGCA	26399	ATAACA	9840	GACGCCC	5785	CCCAACTC	1295	GTGCCCCCC	744
		CTAAG	26384	CCTATA	9840	ATCACCC	5780	CCTACCTC	1287	CGCCCGGCC	741
		AGCTC	26337	AGCCAC	9826	GCACCCA	5779	CCCAACCA	1286	GCCCACCAC	740
		CATCG	26283	GGCCAC	9825	CTACCTC	5779	TAAAAATA	1285	AGCCCCGCC	739
		TATCA	26253	CCTTAA	9824	CTGCCCT	5775	CCGCACAC	1283	CCCATCCCC	738
		TCCTT	26234	GTACCC	9822	TGCCCAC	5771	GCACACCC	1282	ACCCCCCGG	738
		CTTTC	26211	GGCACC	9807	CATCCAC	5767	AAAAACAA	1279	CCCCATCCC	737
		CTTCT	26166	GCCCTA	9803	CACCGCA	5766	ACAGCCCC	1279	CGCGCCGCC	735
		CCGTG	26156	CGACCG	9801	TTGCCCC	5757	CCCTCAAC	1278	CCTCCCTCC	734
		CGAAT	26144	AAACCT	9774	CCACTTC	5744	CCCCTCTA	1278	CCCCCTCCT	733
		AGCAT	26074	GACCTC	9770	CGACCCT	5737	CCACCTCA	1276	GCCCCCTCA	733
		ATTCA	26073	ACCCGT	9755	CGCCAAC	5727	TCCCACAC	1275	GGACCCCCC	732
		GCCTG	26050	ACAATA	9751	ACTCACC	5719	CCTACACC	1274	GCCCCCAAC	732
		GTCTC	26030	CATTCC	9746	CTAGCCC	5718	CCTCCCAT	1273	CCGCCGGCC	731
		CGGAA	26012	TACCTC	9744	GGCCGCC	5717	AATAATAA	1272	GCCCACCCG	730
		TGCCG	26012	TTCCCA	9742	ACCTGCC	5701	CCCGACAC	1270	GCAGCCCCC	730
		AAGAA	26007	CAATAA	9740	CCACGCA	5699	ATATAAAA	1269	AGCGCCCCC	729
		CTGAT	25981	CTTACA	9733	CACCACG	5691	GCCCTCAC	1266	CCACTCCCC	728
		ATAAT	25930	CATCCT	9733	GCCACCA	5691	CCCACCTT	1264	GCCCCCCAA	728
		CTTTA	25914	CTCCGA	9712	CCCACAG	5688	TATAAAAA	1264	GACCCCCAC	725
		GTCCG	25904	AAAAAA	9711	CTGCGCC	5687	AACACCCC	1261	GCCCCGCCA	724
		CGGTC	25888	CTCAAA	9705	CCCCATT	5685	ACCTCCTC	1261	GCCCCACCG	722
		TCATA	25888	GCACAA	9705	CCAAACC	5676	ACGCACCC	1260	CCTCTCCCC	722
		GACGA	25880	AACTCA	9691	CCTTGCC	5671	ATAAAAAT	1258	GCCCGGCCC	721
		CTCTG	25837	CACTTA	9661	CCGCCAA	5666	ACCCTACC	1258	GCCCGCCCG	720
		GGGCA	25835	CACAGA	9659	CCAACGC	5665	TAAATAAA	1256	GACCCCGCC	719
		TTCCG	25759	TACCGC	9656	CCGCGAC	5659	ACCATCCC	1255	TGCCCCGCC	718
		ATATA	25752	CCAAGA	9653	GCACACC	5658	TCTACCCC	1253	GCCACCCCA	717
		ACGCT	25731	GCCTAC	9639	GCCCAAC	5657	ACACACAC	1253	GCCACCCAC	717
		TAAAT	25726	AAAACC	9638	CGCCCAA	5657	CCCACCAT	1251	GCGCCCCTC	717
		GGTAC	25726	TACTCC	9615	CACTTCC	5655	CACACCCA	1251	ACCCCCACA	716
		CATAG	25719	GGACCC	9602	CTACTCC	5653	CCCTTCAC	1249	GCGCCACCC	715
		TGTAC	25654	CCGAAC	9590	CCCGAAC	5653	AAAATATA	1249	CGCCCCGCA	714
		ACTGA	25646	ATTCCC	9580	TCCCACA	5651	ATCCCCAC	1249	CGCGCCCGC	714
		CGCTT	25644	CTAGCC	9580	ACTTCCC	5649	TCACCCGC	1247	CCCCCACGG	713
		GTTAC	25637	GCAACA	9574	ACCCACG	5648	TCTCACCC	1246	GCACCCCCA	712
		GTCGC	25630	TCCTCA	9572	CCGCACT	5647	TAAAAAAT	1246	GACCCCCGC	712
		GCGGC	25614	TAACAC	9567	AACCCTC	5645	AAAAAATT	1245	GACCCCCCA	711
		CGTTC	25604	ACCTTA	9561	CACCCTG	5643	CCCACTAC	1244	ACCCCCGCA	710
		AAACG	25601	CTCCAG	9561	CCGTCAC	5640	ACCCTCCT	1243	CCCCAGGCC	710
		CCTGG	25595	CACGCG	9546	ACATCCC	5634	AATAAAAT	1242	CCGCCCGAC	709
		CAGGG	25515	CCATTA	9544	TACCCTC	5633	AACCCCCA	1240	CCCACCGAC	708
		TTCGC	25506	ATACAA	9538	AACGCCC	5633	AACCACCC	1238	GCACCCCCG	707
		ACAGT	25466	CTGCCA	9530	TCACCAC	5632	TCCCTCTC	1237	CTCCCCTCC	707
		TGCTC	25466	GCACGC	9525	ACAGCCC	5618	AAATTAAA	1234	CCCGCGGCC	706
		CTGCG	25443	AACCAT	9521	CGCACCT	5613	TTAAAAAA	1231	ACCCCCGGC	706
		GCGAA	25422	CCCGAG	9520	TGCCCCA	5610	CCCACACT	1231	ACCCCCGCG	706
		GCCGT	25403	TGCACC	9520	CCCAGGC	5608	AAATAAAT	1230	GGTCCCCCC	703
		TGGAC	25334	CAAACG	9509	GTGCCCC	5606	CAACCCCA	1230	GCCGCCCCT	703
		GCTCA	25319	CTCCAT	9504	CCTCACT	5602	CACACCTC	1229	CCGCGCGCC	702
		GCAAT	25303	ACTCCG	9494	TGACCCC	5601	TCCCCAAC	1228	CCGGCGCCC	702
		AATAT	25257	CATCCG	9494	CACCTGC	5598	TCTCCCCA	1228	GGCCCCCCT	701
		AATTC	25244	GACCAA	9490	CAACGCC	5589	ACCACCGC	1228	ACGCCCCCA	700
		GCTGC	25198	CGCCTA	9485	CGCCTAC	5587	ACCCCTTC	1226	AGCCCCCGC	699
		CAAGT	25153	TCACTC	9476	AGCCCAC	5586	CCCTCCAA	1226	GCCCGCCAC	699
		ACGTA	25153	ACTGCC	9475	CCCACGG	5574	AACAAAAA	1223	GCCCCCGCT	699
		TCGAA	25152	CGACAA	9471	CCGACCG	5574	GCACCCCA	1220	CCGCGCCGC	698
		ACATG	25141	GACTCC	9467	TCACCCA	5572	ACCCTCGC	1219	CCCTCTCCC	696
		TCTGC	25136	CACAAT	9464	TGCACCC	5568	TAATAAAA	1217	GGGCCCCAC	696
		CAATG	25115	CCCGGG	9459	CCCGGCA	5563	CACCCACA	1216	GGCCCTCCC	695
		GCATA	25114	CTCATC	9458	CCATGCC	5562	CCCCACGA	1215	GCCCTCGCC	695
		CAGAG	25104	CCAGCG	9446	CGCCCTA	5562	CCACCTTC	1215	CTCCCCCCT	693
		TTCAT	25020	CTGCAC	9441	CCTAGCC	5561	ACCCCTCA	1212	CTCTCCCCC	693
		TGAAA	25002	TCACGC	9433	CCACCTG	5561	CACACACC	1209	GGCCCCCGG	692
		GTAAA	24991	GACCGC	9432	CCCACTG	5558	TCCCCCTA	1205	GCCCAGCCC	692
		TCCTG	24897	ACAATC	9429	CCCCGGG	5558	AAACCCCC	1204	CCCCGTCCC	691
		AATGC	24849	CGACGC	9429	ACCACGC	5557	AAAAATTA	1204	TGCCCCCGC	691
		ATGAA	24799	TCCCAT	9417	CTCACTC	5552	CAACCCTC	1202	GCCCACACC	691
		TCTTC	24762	CTACAT	9416	GGACCCC	5550	AAATATAA	1202	ACCCCGGCC	690
		TCCGT	24747	CTATAC	9411	CCACCAT	5548	CACCACTC	1199	GCACCCGCC	690
		ACAGG	24731	AACATA	9407	CACTCCT	5546	TCACCACC	1197	GCCGCCACC	689
		TAATA	24705	TATCCC	9404	CCGAACC	5545	CCTCCACA	1192	CGGCCCACC	688
		GAATC	24699	AATACC	9404	AACCCCT	5540	CCCACATC	1191	CCCCCCGTG	688
		AACGT	24603	TCCCGA	9401	CCCTGCA	5539	CACCCCTA	1191	CCCCACACA	688
		ATAGC	24595	ACGACA	9401	CCTGCCT	5538	CCTCCCTT	1188	CCCCACCGG	688
		AGCTA	24594	CTAAAC	9400	ACACCGC	5535	CCCCTACA	1187	CCCCCAGGC	688
		TAAGC	24565	ACCCGG	9394	GCGCCCA	5534	CCTACCCT	1187	CGCCACGCC	687
		CTGTA	24546	CCTTGC	9380	TCACACC	5531	CACCACCA	1183	CTCCTCCCC	687
		CTTGA	24500	CCCGGA	9351	CCACGGC	5526	ACACCCCG	1183	CCGTCCCCC	687
		CGGGA	24493	GCACTC	9350	AACTCCC	5526	GCCCACTC	1183	GCCCCCCGT	687
		ATCGA	24485	TACGCC	9340	CCCAACG	5524	CCAAACCC	1182	GCCCGACCC	684
		TAGCA	24471	TCATCC	9340	GACCGCC	5524	CCATCCCA	1182	CGGGCCCCG	684
		CTATT	24468	AACATC	9321	CGCGCCA	5520	TCACGCCC	1180	CCTCCTCCC	684
		GAACT	24463	CCCGTA	9312	CCGCTAC	5516	GCCACCAC	1178	GCTCCCCGC	683
		CGAGA	24454	TAACAA	9305	CGGCCAC	5514	CCCTACTC	1178	CCCGACGCC	683
		GCTTC	24374	CATCTC	9302	AGCCCCA	5514	TAAAATAA	1176	ACGCCCGCC	682
		ACTAG	24352	ACACTG	9294	CAGCCCT	5514	CCCCATAC	1175	GACGCCCCC	682
		TAACG	24286	CCGACG	9275	CTCTCAC	5505	CCCCTCAT	1175	ACGCCCCGC	681
		GATCA	24243	CTCGAC	9254	CCCAATC	5505	CCTCCTAC	1175	CCGCCCGGG	681
		AAAAG	24224	CCCTTT	9249	ATCCCAC	5502	ACCCCGAC	1173	GCCGCACCC	681
		AACTG	24217	CCCAGT	9245	CCCGCAA	5497	CCTAACCC	1173	TCCCCCCGG	680
		ATCAG	24209	CCATGA	9224	CAAGCCC	5494	ACACCGCC	1171	GCACCCCAC	680
		ATACG	24200	CATAAA	9222	TTCACCC	5491	AAAAATAT	1168	GCACCCCGC	679
		CGCTG	24104	ACCTCG	9215	CTACCCG	5490	ATACCCCC	1167	CCCGCCGCA	678
		CATTT	24084	CAAATA	9214	GACCCCT	5489	CCCACCGA	1165	GGGCCCGCC	676
		AGGCA	24041	AAGCCC	9211	ACCCCGA	5489	ACCGCCCA	1165	CCGCCCCGA	676
		TTTAA	24037	CCAAAG	9209	CCGTACC	5487	ACCGACCC	1162	CCCCCCAGA	675
		CAGCT	24024	CTCGCA	9208	GACCCTC	5486	TCGCCCAC	1161	CCCCACGAC	675
		TTCTA	23976	ATCCAA	9206	CCCGGAC	5482	CCACGACC	1159	GCCCGCACC	674
		ACTCG	23890	GCCTCA	9200	CATTCCC	5480	AAAGAAAA	1156	ACGGCCCCC	673
		GAGCA	23883	AATACA	9193	CACCTCT	5473	ACGCCACC	1155	CCGCCCACA	673
		TACTT	23869	ACTAAA	9174	CCTACCG	5462	CCATACCC	1151	CCGCCGCGC	673
		TTACT	23859	CACTCG	9173	CCCGCTA	5459	TACCCCTC	1150	CGCGCCCCG	672
		GCCGG	23857	ACAGCA	9171	GCCACCT	5453	CCCTACCA	1150	CGCCCCCGA	672
		CTGCT	23840	CACAAG	9161	CGCGACC	5451	CATCCCAC	1147	CCCCCTGGC	671
		AAAGA	23826	ATACCT	9156	CCTTCCA	5447	AAAATTAA	1146	GGGCCCCTC	670
		GCGTC	23800	AACTAA	9156	CCCAGCA	5446	CCACTCCT	1146	TCCACCCCC	669
		TTATC	23777	CCTCTG	9141	ACCCTTC	5444	AAAATAAT	1145	GCCTCCGCC	669
		GGCAT	23767	ACCTAT	9133	GACTCCC	5435	ACCTCCCT	1143	GCCCTCCGC	669
		AGACT	23727	ACTCTC	9117	CGACGCC	5434	ACCCGACC	1142	GCCTCCCGC	668
		GCGCG	23712	GACGCC	9116	CGCCACT	5432	CCAGCCAC	1141	CCACCCCGG	668
		TCAAG	23658	ACTACT	9110	GCCCCTA	5430	ATAAATAA	1138	GACCCCCCG	667
		GTCAT	23589	ACAAGC	9109	CCGGCCT	5428	ACTCGCCC	1137	CCACCCACA	666
		ACGAG	23576	ATCCCG	9107	TACCCCT	5426	GACCCCAC	1137	AGCCCCCCA	666
		TGCAT	23556	ACCAAG	9105	CCCCAGA	5426	CGACCCAC	1136	ACCGCCCAC	666
		CTGGA	23531	CTAACT	9104	TGCGCCC	5423	CAAAAAAA	1133	GCCCTCCCG	665
		CAGGT	23489	TTACCA	9102	ACCACCG	5423	TCCCCCAT	1133	TCCCCCGGC	665
		ACGGA	23471	CGCAAC	9098	CCACTGC	5422	CCGACCCA	1133	GGGCGCCCC	665
		GGAAA	23448	GCGACC	9094	CCCATTC	5419	CTACCCCA	1131	CCGGCCCCA	665
		GTGCA	23336	CCCTGG	9076	CACCCAG	5414	CCAACCGC	1131	GACCCCACC	664
		TTGCA	23314	CGCACT	9074	CCTCGAC	5411	CCTCGCAC	1128	GCCCCACCA	664
		AGATC	23300	ACAGAC	9074	AGCACCC	5408	GCCCCAAC	1125	CCGGCCCCG	664
		AATTA	23280	TACCTA	9055	GCCCACT	5405	TCCCGCAC	1125	GAGCCCCCC	663
		AATCT	23239	TCCTAC	9051	GCCGACC	5404	CCTCTCTC	1124	GGGCCCCCT	663
		AGTCA	23179	CAAGCA	9047	CCCTATC	5396	CCCTCACA	1123	CCCGCCACA	662
		CTTCG	23178	GCCCAG	9039	CCAACCG	5394	GCCCCCAA	1123	GCCCTGCCC	662
		GAAGC	23148	GCCCGA	9036	CCCTACT	5388	CTACCCTC	1123	GCTCCCGCC	662
		GGGTC	23120	CACATT	9024	CTCCGAC	5384	CCGCCCAA	1122	AGCCCCCCG	662
		AGCGA	23113	CTCAGC	9018	CTATCCC	5384	CCCTCCTA	1122	GCCCCGACC	662
		CGTAT	23057	AGCCCT	9013	CTGCCTC	5384	CCACCCTG	1120	GGGCCCCCA	661
		GACTT	23052	ACAAAT	9011	CTCCACT	5382	TCCCCTAC	1120	CCCGCCCGA	661
		AGCAG	23039	CAACTT	9000	CTCCCTT	5380	ACCCCCAG	1116	GCCTCCCCG	661
		AAGTC	23018	CGAACA	8993	ACCATCC	5378	ACCCGCTC	1115	CGGCCACCC	660
		CGAAG	22993	CTAACG	8992	ACACCCG	5372	CCTCACGC	1114	CCTACCCCC	660
		GGGAA	22983	TCCCAG	8986	CTACCGC	5370	TCCCCACA	1114	CGCGCCCAC	660
		TTTCA	22982	CCGTCA	8971	CTGCCGC	5368	ACTCCTCC	1114	GCCACCCCG	660
		GCAAG	22980	CACATG	8966	CCGACTC	5366	CCTCACCT	1113	GCGCCCTCC	659
		TCTCT	22965	CCTCTT	8964	CCCAAGC	5359	ACAAAATA	1113	ACCCACACC	659
		CATGT	22946	TCTCCA	8951	CCCACGT	5352	CCTCCCGA	1112	CGCGCGCCC	659
		AGTAA	22945	CCGCTA	8947	TCCCAAC	5351	CCCCTTAC	1110	GCACACCCC	659
		TCAGA	22943	CGTACC	8944	TCGACCC	5350	TCATCCCC	1107	CCACCCGAC	659
		GTCTA	22928	TAAACA	8943	CACGCCG	5345	ACCCCAGC	1107	CCCCCACAA	658
		AAGGC	22872	AAACTA	8932	CGCTACC	5341	TACCCCCA	1106	CGGCACCCC	658
		CGCGT	22870	CGCACG	8926	CCGAGCC	5338	ACCCCCGT	1104	CGCCGCGCC	658
		AAATT	22745	CCATAT	8919	CCCCTAT	5336	CTACACCC	1103	CCCCCTACA	658
		TCTAT	22738	CATCGC	8915	ACCTCCT	5336	CCCAACCT	1102	CGGCCCCCT	658
		TATTC	22722	TGCCAC	8910	CGACCTC	5335	CCTGCCAC	1101	GTCCCCGCC	657
		ATTTC	22721	ACCGCG	8910	CAGTCCC	5333	TCCACCAC	1099	CGCCCCGAC	657
		GCGCT	22719	TTACAC	8907	CCACGTC	5333	CCATCCTC	1099	ACGCCCCAC	656
		CGCGG	22686	AACCGA	8906	CCAGCCA	5331	ACCTGCCC	1098	GCCGCCCTC	655
		AGAGC	22644	ACACGT	8900	ACCTTCC	5330	CCACCCAG	1096	CCCCACGGC	655
		CTTAG	22642	CTATCA	8897	CTCCCAT	5329	CCCCTCTT	1095	CCCCGCGCG	655
		CTGAG	22641	CCTGGC	8894	CACGTCC	5329	ACCTCACC	1095	CCGACCCCA	654
		CGGAT	22641	GCATCC	8884	CAACTCC	5324	ACCCGCCA	1094	GCCCTCCAC	654
		TAGAA	22589	AATCCA	8883	CACCGTC	5323	AGAAAAAA	1093	GCCCTCCCA	654
		TATGC	22552	GAACCA	8877	TTCCCCA	5323	ACATAAAA	1093	GGCTCCCCC	653
		CTCGT	22508	AAACAT	8876	CCCTCAT	5322	ACCCACCG	1092	CCCCCGGCA	652
		GAACG	22413	ACTTCA	8876	CCCCAAT	5321	ATAATAAA	1090	ACCCCCCAA	651
		CGGCG	22408	ACCATT	8868	CCGTGCC	5315	AGCCCCAC	1090	CGGCCCCTC	651
		TCCGG	22402	CTACAG	8867	GACCTCC	5314	ACCACTCC	1090	CCCCCACGA	651
		GGCTA	22375	AACCTT	8865	AAGCCCC	5309	CCACGCCA	1090	CCCACCCGA	651
		GAAAT	22347	CACGAA	8862	GCTACCC	5308	TCTCTCCC	1085	CGTCCCCCC	651
		CTCGG	22343	TCCACG	8860	CTCGCAC	5308	CCCCCTAA	1085	CGCCCCTGC	650
		GGCGA	22332	CCTTCT	8857	ACCGGCC	5307	TCTCCCCT	1085	ACCGCCGCC	650
		CTATG	22327	GCCCAT	8853	ACCCGCA	5299	CCCCACTG	1084	GCCCCTCCA	649
		GGATC	22322	AACAGC	8853	ACCGCCT	5299	TCCCACTC	1084	CCCGACCGC	649
		ATGTC	22319	TCTACA	8842	GGCCCCT	5295	CCTTACCC	1082	CCCACCCGG	648
		GAATA	22249	GAACAC	8837	CCGGCGC	5292	CACCTCTC	1082	GCCACCACC	648
		GCAGA	22235	ACCGGC	8837	CACCAGC	5290	GAAAAAAA	1081	ACCCCCCGA	648
		TGCTA	22202	AGACCA	8830	CTTCCCA	5287	TCCCCCTT	1080	CCCCCAACA	648
		TCGGC	22201	ACTTAC	8827	CCTCATC	5287	ACCTTCCC	1076	CCCCCGGAC	648
		GTACT	22197	CACGTC	8824	CCCCAGG	5287	CCACACCG	1074	CCCGCCCAG	648
		ACTTT	22166	CACTGA	8821	AGACCCC	5286	CAACCACC	1073	CCGCCCGCA	648
		GGCTC	22159	ATGCCC	8809	ACGCCCT	5285	AACCTCCC	1073	GCCCACCCT	646
		TGATC	22105	CCCTGT	8803	AAACCCC	5278	AAAAGAAA	1072	CCGCGCCCG	646
		AGACG	22090	CACAGG	8802	CCCTGGC	5276	CTCCACAC	1071	ACGCCCCCG	646
		TATAT	22086	CGCTAC	8800	CAACCGC	5273	AAAAAGAA	1070	GCCCACCTC	645
		TTAAT	22075	CTAAAA	8800	CGGCCCA	5271	CTCACCAC	1070	ACCGACCCC	645
		CGTTA	22070	GCGCCA	8779	CCACCGG	5268	ATCCCCTC	1070	CGCCCCACA	644
		ATCTT	22017	CTACGA	8778	CCGCCTT	5267	GCCCACCA	1069	CTGCCCGCC	644
		GACGT	21994	CAGACA	8772	CCAAGCC	5262	AAGAAAAA	1069	CCGACCCCG	643
		GTATC	21983	ATCTCC	8770	TGCCACC	5260	AAAAAAAG	1069	CCGCGGCCC	642
		ATTGC	21982	CCGACT	8760	CTCTCCA	5257	CCATCACC	1067	GCCACGCCC	642
		TACGT	21971	GCCGCA	8758	CCGCCAT	5253	CACCCCAT	1067	CAGCCCCGC	642
		GCGAT	21945	CCAATT	8751	AACCTCC	5253	TAACCCCC	1065	AGCCCCCAC	642
		AGGGC	21927	GCTCCA	8746	ATTCCCC	5253	CACAACCC	1064	CCGCGCCCA	642
		TCTTA	21925	TACACT	8740	TCTACCC	5244	CCCCAATC	1062	GCCACACCC	641
		TTGAA	21919	TTCACA	8737	CATCCCT	5241	CACTCCAC	1060	CCCGGCCGC	641
		GGACT	21896	CAACTG	8724	CCTATCC	5240	GCCCCCTA	1059	GCCCCCTCG	640
		CAGTT	21880	AAACCG	8722	CCCGACT	5237	CCCCACAG	1059	GCGCCCCGG	640
		CGTGA	21869	CACGCT	8721	CGCGCAC	5233	TCCTCCAC	1057	GCACGCCCC	639
		GGGGC	21839	GCCGAC	8715	CCGCCGA	5232	ACGCCCCT	1055	CCCCACCTA	638
		ATGGC	21814	TCCACT	8709	CACCGGC	5231	AATAAAAC	1055	GCCCCACCT	638
		TTCAG	21802	AACGCA	8702	AGCCACC	5230	CCCCCTTA	1054	GTCCCCCGC	638
		GCTAT	21797	CATCTA	8702	CCCCTGA	5230	CCTCCATC	1053	CCGGCACCC	636
		CGATT	21791	CATACT	8698	TCCCCTA	5228	AATAACAA	1051	ACCCCACAC	636
		TGACT	21789	CAAATC	8693	TACTCCC	5228	CACCCTAC	1051	CGCGCCACC	636
		AATGA	21753	ACCTGA	8684	GCCTACC	5223	AAATAAAC	1050	CCCCGCCGA	636
		GGCAG	21746	ATCCTC	8679	CTCGCCA	5222	AAACAATA	1049	CCCGGCACC	636
		AAGAT	21741	CATTAC	8662	CGTACCC	5220	CCTACCGC	1047	CTGGCCCCC	636
		GGAGC	21736	AAACTC	8655	CACCCGT	5219	CCCAACGC	1047	CGCGCCCCA	636
		TTCGA	21728	CTTGCC	8654	CGTGCCC	5216	ACGCCCGC	1047	ACCCCCCTA	636
		CAAGG	21705	CCCGAT	8648	CAATCCC	5216	TCTCCCGC	1046	CCCGCCCTG	636
		GTTAA	21617	CATTCA	8646	CCATCCT	5214	TCCCTCCA	1046	GCCGTCCCC	635
		ATAAG	21606	CGCCGA	8645	GCCGCCA	5210	AACCCACC	1046	GACCCGCCC	635
		TGAGC	21573	GTCACC	8638	CTCTGCC	5207	CACCCCTT	1043	GCCCCCTTC	635
		CTAGT	21568	CGACTC	8633	CCAGCCT	5204	CCCACTCA	1042	CCCACACCA	634
		GGTCA	21556	TCCGCA	8630	GCCCCAA	5199	GCACCACC	1041	CCCACCGCA	634
		TACTG	21536	CAGGCC	8620	AGCGCCC	5195	AAAAAAGA	1041	CCCCCTGAC	633
		TTAGC	21521	TACAAA	8618	GCTGCCC	5191	ACTAAAAA	1040	CCGCCCTGC	631
		GAGAA	21516	CTCTAA	8613	ACTCCCT	5191	AGACCCCC	1038	ACCGCCCCA	631
		GATGC	21515	TCTCAC	8612	GCACCCT	5190	CCACATCC	1037	ACCCCCGAC	631
		TCGCG	21484	TCCAAA	8611	ACCCCTG	5190	TACACCCC	1037	CCCCGCGAC	630
		GTTCA	21474	AGACAC	8609	CAGCGCC	5189	CCAATCCC	1037	CCCCCCTTA	630
		AGAAT	21467	ACCGCT	8607	GAGCCCC	5188	CCACTCGC	1035	CACCCCCGG	629
		TAAAG	21445	TTAACC	8597	GGCCCTC	5182	CCCCCAAT	1034	CCCACCCAA	629
		TGGCA	21430	GACCTA	8592	TACCGCC	5182	GCCCCACA	1034	GCCAGCCCC	628
		CAGTG	21388	GACAAC	8592	CCTCCAT	5178	ACACCCAA	1033	GGGACCCCC	628
		TCGAT	21369	CAAGAC	8591	CCCTAGC	5173	CCACCAGC	1033	AGCCCCACC	627
		GGGAT	21360	CTCCTG	8591	ACCCTGC	5171	ACCCATCC	1032	CCCCGGCGC	626
		TTATA	21354	AAATAA	8579	CCCATCT	5170	TAAAAAAC	1032	GCCTGCCCC	626
		AGATA	21328	ACCAGA	8575	GCCGCAC	5170	GCCCTCTC	1030	GCTCCCCCA	626
		TGTCA	21318	TCACTA	8560	CCATTCC	5168	CCCACGAC	1029	GCACCCACC	625
		GACTG	21284	AACAAT	8546	CCTGCGC	5165	CCCTGCAC	1029	ACCCCACCA	625
		TTACG	21283	AACGAC	8543	CCCATGC	5164	AATCAAAA	1028	ACACCCCCA	625
		CGTCG	21281	CCGTAC	8536	CTCCTCA	5162	CACCGCAC	1028	GCCCCGCCT	625
		ACGTT	21254	CCGCGA	8536	GTACCCC	5160	ACCACCCG	1027	CCCCACCGA	625
		CGGTA	21249	GATCCC	8532	GACCCGC	5155	ACCCTTCC	1027	TCCCCGGCC	624
		GATTC	21218	CTGACA	8529	CACCCGG	5152	TCCCCATC	1024	CGTGCCCCC	624
		TAAGA	21172	ACATCT	8529	ACCCTCT	5151	ATGAAAAA	1024	GCCCCCATC	624
		ATAGA	21163	CTTAAC	8525	CACTCTC	5150	AAAACATA	1023	CCTCCCCGG	623
		AACGG	21136	TCCCTG	8518	GGCCTCC	5150	CACACCCT	1023	CCCCGCGGC	623
		CATTG	21098	CCAGTC	8515	CCCCTTT	5150	CCAACTCC	1022	CGGTCCCCC	623
		ATTAT	21051	CTTCAA	8512	CCACCGT	5143	ATTTAAAA	1020	GCCCCTACC	623
		TGCGA	21035	TACTCA	8511	CCCGTAC	5142	AAAATAAC	1018	CCCGCACAC	622
		GGGCG	20994	CGCCAG	8507	TAGCCCC	5142	CCGCACTC	1018	CCCACGGCC	622
		TATCT	20955	CTCATA	8505	CGGCGCC	5137	CCCATCTC	1015	CCCCCCGGT	622
		TCATT	20936	CCTTCG	8504	TGCCCCT	5134	CCCAAACC	1015	ACCCCCAGC	622
		TGCAG	20925	ACTCTA	8488	CACGCGC	5132	ACCCCTGC	1014	CGCCCGCGC	622
		TGTAA	20915	AGCACA	8487	CTCGGCC	5132	GCGCCCAC	1014	CCCGCCCTA	622
		TCGCT	20846	ACGCCT	8485	GCGCACC	5130	CTTCCCAC	1014	CTCCACCCC	622
		GCATT	20834	CCAGAA	8484	CTGCCCG	5130	AAACATAA	1012	ACGCCCACC	621
		GCTTA	20821	CACTAT	8479	CGCCGAC	5129	TAACAAAA	1012	ACCCCCCAG	621
		AAGTA	20820	CGCGCA	8474	CGACCGC	5124	ACCCCCTG	1012	GCCCCCCAT	621
		CTTTT	20807	GCCAGC	8470	CTCAGCC	5123	CCACCCGT	1011	CCGCGCCAC	621
		ACTGT	20779	TACAAC	8464	CCCTACG	5120	ATAACAAA	1011	CCGGCCCAC	621
		GTCGA	20773	ACCGAA	8445	CCGCACG	5120	TCGACCCC	1011	CCACCCGGC	621
		AGTGC	20757	CGGCAC	8443	TACCCGC	5119	ATTAAATA	1010	GCCACCCTC	621
		AGGAA	20745	ACATTC	8436	CTCCACG	5119	CCACGCTC	1010	GCCCCCACT	620
		TCTGA	20735	GCAGCC	8434	CTCACGC	5116	TCTTCCCC	1010	CGACCCGCC	620
		ACGGG	20698	TCGACC	8422	CCCTTGC	5113	CCGACACC	1010	CGCCCCGGG	620
		GAGGC	20676	CCAATG	8413	CCCGACG	5110	CCCCTATC	1010	CCCCCAGAC	619
		AAGCG	20674	CGTCAC	8406	CTCCATC	5109	GCTCCCTC	1009	CCCCTACCC	619
		GTCAG	20646	CTATAA	8401	CCACTCT	5107	CCCATACC	1009	GGCCCCGCG	618
		GTGAA	20604	TTCCCG	8395	CCTGCCG	5103	ACTCCCCG	1009	CCCACCACA	618
		GGACG	20603	ATCAAC	8390	CCCGTCA	5095	CCCATCCA	1008	GCCCCTCGC	618
		GCGAG	20596	GCCAAA	8389	TCCCTAC	5091	AAATAACA	1008	GCCGCCTCC	618
		TGACG	20588	CCTAGA	8379	ACGGCCC	5091	ACACCAAC	1008	GCACCCCTC	617
		GGTAA	20572	TTCCCT	8376	GCCCTAC	5090	CCTGACCC	1007	TGCGCCCCC	617
		TAGGC	20496	GCCCTG	8370	CCACGCT	5088	GCACTCCC	1007	CCCCCCGAG	617
		ATATT	20488	CGCCAT	8368	ACCCAGC	5086	GCCACCTC	1006	CCCACCCTA	616
		TATTA	20468	CCGGCA	8351	CGCGGCC	5085	CACCACCT	1006	ACCCCCACG	616
		GATAT	20467	ATCCGC	8351	AACCGCC	5084	TCACCTCC	1006	GCCCCTCCG	616
		AATAG	20444	CCTGCG	8346	CCTCTCA	5081	ACCCGCCT	1003	TGCCCCCCA	616
		ATTTA	20431	CCGCAG	8344	CCTCACG	5081	CCCAGCAC	1002	CACCCCGAC	616
		AGGTC	20405	AAAACT	8339	ACCTCTC	5080	TAAACAAA	1002	CGACCCCCG	615
		ATTCT	20380	GCTCAC	8336	CCCTCTT	5079	CCCGACCA	1001	CCGCCCCTG	614
		ACGGT	20359	CCTTTA	8332	ATCCACC	5076	CCAGCCCA	999	CCGCCCAGC	614
		GCGTA	20358	TAACCT	8325	ACTCCTC	5076	GCCCCCTT	998	CAGGCCCCC	614
		GTAGC	20358	TACACG	8323	CGCGCCT	5065	CCGCCCTA	998	ACCCACCAC	614
		CGGGT	20277	AAATCC	8320	CAGCCTC	5064	CCCTCTAC	996	ACCCCCAAC	614
		AATCG	20219	GGGACC	8317	CTCACCG	5064	ACCGCCTC	995	CCCCCCGTA	613
		GTACG	20206	CCTAAT	8317	CCCCATG	5063	CCTCTCCA	995	ACCCCCTCA	612
		TAGTC	20200	ACTGCA	8316	CAACCCG	5063	TAAAACAA	993	CCCACCGCG	611
		TGAAT	20187	CAAAGC	8308	CGTCACC	5062	CACCACGC	993	CCGCCCCAA	611
		AAATG	20141	GCTACA	8304	TGCCCTC	5059	CAACTCCC	991	CCGCCAGCC	610
		CGTCT	20138	TCAGCC	8301	CGGTCCC	5055	TATATAAA	991	ACCCCCTGC	610
		ATGAT	20125	ACTACG	8301	TAACCCC	5055	CCCCGACA	991	GACCCCCTC	610
		ACTTG	20120	CCGAGC	8299	GCCAACC	5053	AAATGAAA	991	TCCCCCGCG	609
		CGGAG	20096	CTAATA	8287	CCCGCGA	5052	CCCCTCGA	990	CCCGACACC	609
		GGATA	20090	CGCGAC	8286	TCAACCC	5050	TCACCCCG	990	CCCTCCGAC	609
		GTATA	20066	TCCCTT	8286	ACGTCCC	5050	CCCCGAAC	990	GTCGCCCCC	609
		CGAGT	20048	CATACG	8285	GCCGGCC	5045	CCCCAACT	990	CCGCCCCAG	609
		AAGCT	20041	CGATCC	8278	CCGGTCC	5044	CGACCCTC	989	CTGCCCCGC	609
		GCTGA	20035	CCCGTG	8277	CCCTGTC	5043	ACAATAAA	988	GCCTCCCCA	609
		GGTGC	20018	CCGCAT	8276	CCGTCCA	5042	CTCCTCAC	987	GACCACCCC	609
		TTTGC	20005	AAACGC	8274	CATCCTC	5040	ACAAATAA	987	CGCCCCAGC	608
		GTAAT	19974	CGAGCC	8259	TCCCCAA	5037	GCCCCTAC	987	GCACCGCCC	608
		AGCTT	19942	ACATGC	8254	CAGCCGC	5035	CCACCACG	987	CCCCTGGCC	608
		AGTTC	19925	ACGCCG	8250	TTCCCAC	5033	AACATAAA	986	CCACACCCA	608
		ATCTG	19906	TATACC	8247	CGCACTC	5029	AATCCCCC	985	GTCCCCCCG	607
		ACGTG	19902	ACATAT	8246	GCCCGAC	5017	CCCCTGAC	985	CGCGGCCCC	607
		TCGTA	19884	ACTCAT	8232	TACCCCG	5016	ACCCGCGC	985	GCACCCCCT	607
		TCTCG	19860	ACATTA	8230	GGTCCCC	5015	TCTGCCCC	985	CGCCCAGCC	607
		TGATA	19857	ACTCGC	8223	CCTGTCC	5010	AAACAAAT	984	GCTCCCCAC	607
		GAGTC	19829	ATACCG	8219	TATCCCC	5006	CACCTCCA	983	CCCCGCGCA	607
		TTTTC	19823	TACTAC	8217	ATCCCTC	5000	GCCCACGC	983	ACCCACCCA	607
		CTGTT	19800	ACACGG	8213	GGCCCCG	4999	ATAAACAA	983	ACCCGCCGC	607
		CGATG	19753	ATTACC	8195	CCTTCCT	4990	CCCTCCTT	983	ACCCCCTAC	606
		CATGG	19710	GTCCCC	8188	GCCACGC	4986	ATAAAAAC	982	CCCCACGTC	606
		TAATT	19705	CCGGGC	8180	CCCTTTC	4982	GCCCACCT	981	GCCCCTCAC	606
		TATGA	19545	GGCGCC	8180	CCGCGCA	4978	GCCCCCAT	980	CTGCCCCCG	606
		CTAGG	19520	CTTCCG	8179	TACCTCC	4977	CCCACAGC	980	CCACCCCAA	605
		ATGTA	19503	CAGCCT	8178	GTCACCC	4977	AATACAAA	980	AGACCCCCC	605
		GTGGC	19490	AAAATA	8177	GCCTCAC	4976	CCACCGTC	980	CCCCCACAG	604
		GCGGA	19489	AATCAC	8176	CGAACCC	4976	ACACAAAA	979	CGGCCCTCC	604
		AAAGT	19477	ACCATG	8174	ACCAGCC	4976	ACGCGCCC	979	CACCCCACA	603
		CGTAG	19471	AAATAC	8173	CCCGCAT	4972	ATCACCCC	977	CCCCCCAAA	603
		ATGCG	19428	CTTCCT	8159	ATCCCCT	4965	CCTCCGAC	977	CGGACCCCC	603
		GATCT	19418	GCCATC	8156	CCGCAGC	4961	CCATCCCT	976	CCCCCCGAA	603
		AGCGT	19376	GCACTA	8150	ATCGCCC	4960	CCTTCCCA	976	CGACCCCCA	603
		CTGGT	19374	CAAAAT	8150	TGTCCCC	4959	TCCCCCGA	976	CCCCCCTGA	602
		TCTAG	19348	ACTATC	8140	CGCCCTT	4958	CCCTCCAT	976	ACGACCCCC	602
		ATGCT	19320	CTCCTT	8133	CGCCACG	4955	CCCACTTC	975	GCCCTCACC	601
		GTGTC	19314	ACCTAG	8128	CGAGCCC	4954	CACACCGC	975	CCGACCGCC	601
		GAAGA	19304	CATATA	8125	CCATCTC	4949	CTACTCCC	974	CCCCCAGGG	601
		TGGGC	19300	CTCTGC	8120	CCCGAGC	4948	CAGCCCAC	974	CCGGCCACC	601
		TTAAG	19255	ATAAAA	8114	CCGCCTG	4948	CATCCCTC	973	GCCCGCCCT	601
		TCATG	19254	TGACCA	8113	GACCCCG	4944	ACCCCGTC	972	CCCGGCCCA	601
		GCATG	19234	TGCCCT	8106	TCTGCCC	4942	CCAGACCC	972	GCCCGCCTC	600
		GAAAG	19222	ACTATA	8093	AATCCCC	4938	CCGACCTC	972	CCCCGCAGC	599
		TCGAG	19210	GACACT	8086	CGCAACC	4936	CACCCATC	972	CCTGCCGCC	599
		ATCGT	19202	ACCGTC	8083	ACGCCGC	4935	AACCCCGC	971	CGCGACCCC	598
		GGGTA	19201	CCTGAA	8083	GCCACTC	4932	ACCCCACG	971	CCGACCCGC	597
		GCTAG	19191	TCACAT	8079	CGCCCAT	4932	AGGCCCCC	970	CCCGACCCG	597
		TAGAT	19182	AAATCA	8077	CCAGCGC	4931	TCAAAAAA	970	ACGCGCCCC	597
		CTTGT	19147	CGCCTG	8075	CTCCAGC	4925	AACAAATA	970	GCGTCCCCC	597
		TGTGC	19115	CGGACC	8074	CGACCCG	4922	CCCGCCAA	968	TCCCACCCC	597
		AGGCG	19095	CATTAA	8067	CCAATCC	4921	ATCCCCCA	968	GCCCCGGGC	596
		TTGGC	19093	ATCACT	8059	CGACTCC	4916	CCCCCATT	967	GCCTCCCAC	596
		GACGG	19054	CTCCGG	8058	CCACCAG	4912	AATTTAAA	967	ACCGCCCGC	596
		CTGTG	19028	CACTAG	8058	CACTCCG	4910	TATAAAAT	966	CGGGCGCCC	595
		TGGAA	19027	ACTTAA	8050	CTTCCCT	4907	AAAACAAT	966	CACCCACAC	595
		CTTTG	18998	TCGCCA	8045	TCCTACC	4907	TAATAATA	966	CCTTCCCCC	595
		TTCTT	18961	CCATAG	8044	AGCCCCT	4906	AAAAAATC	966	CCCCAACAC	595
		AGCTG	18930	TACCGA	8041	TCCGCAC	4903	AAACTAAA	966	ACCCCCCTG	595
		AATTT	18860	AACAGA	8041	CCTCCTT	4903	CAACCCCT	965	GACCCACCC	594
		TTGTC	18850	GCGCAC	8029	CCTTCTC	4901	CCCTACCT	965	CCCCACTCA	594
		GGTTC	18847	TTCCAC	8027	CACCGCT	4901	ACAAAAAT	964	GCCCCCCTT	594
		GATTA	18827	GGCCCT	8011	TCGCCCA	4898	CCGCCACA	964	CCAGGCCCC	594
		GTTGC	18815	ATACTC	8009	TTCCCCT	4898	AATATATA	964	ACCCGCGCC	594
		GTCTT	18813	CAGCCG	8003	CTCCCGA	4894	TGCCCCAC	964	CCGGACCCC	594
		TACGG	18805	TTAACA	7998	CCTCAGC	4893	CAAACCCC	963	GCCCTACCC	594
		GCAGT	18776	ACAAGA	7998	CTCCGCA	4892	ACACACCA	963	CCACCCCGA	594
		AAGGA	18696	AATCAA	7992	TCACCCT	4892	TCCCCGAC	962	CGACCCCAC	593
		ATTGA	18691	CATGCA	7986	CCCGCTT	4889	TCCGCCAC	962	CCCGACCAC	593
		TTTAT	18578	AGGCCC	7981	CACGCTC	4886	CCGCCAAC	962	CACCCCGCA	593
		TCGGA	18571	CCGGAC	7977	TCACCTC	4885	ACCTCCGC	962	CCGCCACGC	593
		AGAAG	18545	AATAAA	7976	GAACCCC	4885	TAAAAAGA	962	ACCCACGCC	593
		TCAGT	18494	CTAGAC	7974	ACACACA	4873	CCTCAACC	962	CCCCCTGCA	593
		AGAGA	18470	CTAATC	7973	CTTCGCC	4871	CCACCTGC	961	CCCCACTAC	593
		GTTTC	18465	GCACAT	7971	CCCTTCT	4869	TTAAAATA	961	CCTGCCCGC	593
		GGAAT	18460	GACACG	7965	CCGCATC	4865	CCTTCCTC	961	CGACCCCGC	592
		GGCGT	18448	TCCTAA	7963	TCCTCAC	4864	TATTAAAA	961	ACCCACCGC	592
		AAGAG	18438	AATAAC	7956	TCGCCAC	4863	TCCTCCCA	960	CGGCCCCGG	592
		ATATG	18436	TGCCCG	7953	CCTCCGA	4863	TCCTACCC	960	GCCCCCTCT	592
		TCGTC	18390	TAACCG	7945	CGCACGC	4861	AAAAACTA	959	CCCCCACTA	592
		ACTGG	18379	AACCTG	7944	ACGCCTC	4859	ATTAAAAT	959	CGCCCCCGT	592
		TATCG	18345	CAATTA	7941	CCCTCGA	4856	AAAGAATA	958	ACAGCCCCC	591
		GGCTT	18336	CGGCCA	7937	TCCACAC	4854	GCACCCCT	958	CCCCACAAC	591
		GAGCG	18336	ACGCAA	7937	TGCCGCC	4850	AATAAACA	958	GCCCACTCC	591
		GAGAT	18309	AGCCCG	7935	CTCATCC	4849	TTACCCCC	957	CTCCCCCGG	590
		CGTGT	18238	CCTGTC	7932	ACCGCGC	4848	ACGTCCCC	957	CCCGACCCA	590
		TATAG	18221	TCCATC	7922	GCCCACG	4846	TCCACCTC	956	CCCGGCCAC	590
		TTAGA	18221	CGCATC	7921	CCCCGAA	4843	CATACCCC	956	ACACCCGCC	589
		GCTCT	18191	AGTCCC	7916	CCTCTGC	4838	CGCCACAC	956	CCGCCCACG	589
		AGTAT	18136	ATTACA	7915	CCCGGCG	4834	AATGAAAA	955	CAGCCCGCC	589
		TGTTC	18127	TGCACA	7913	ACCCCAG	4834	TACCTCCC	955	CCCCCTGCG	589
		CTGGG	18115	CCGATC	7910	GCCTCCA	4834	CCACTTCC	954	CACACCCCA	589
		TTTTA	18103	ACAGGC	7906	CATCGCC	4829	CCCCACGT	953	AGCCCCCCT	589
		TGCTT	18062	TTGCCC	7904	ATCTCCC	4827	TAAATATA	952	CCCGCCTGC	589
		TGGTC	18036	ATCCTA	7902	TCCCACT	4825	AAAAATAC	952	AGCCCCCTC	589
		TAGCG	17988	CCAGCT	7895	CGCACCG	4823	CCACCTCT	952	CGCCCACGC	588
		AGGAT	17951	CATATC	7893	CCCCTTG	4823	CTCCCCAA	951	CCCCGCACA	588
		CGGGG	17899	CCTCGG	7892	GCGCGCC	4821	AAATTATA	951	CCCGCAGCC	587
		TAATG	17835	CACAGT	7884	CCGCCGG	4819	CCACGCGC	951	CCACCCGCA	587
		AGGGA	17825	CAACGT	7883	TTCTCCC	4817	TCCACCCA	949	ACCACCCCA	587
		TAGTA	17823	CATGAC	7878	AACCCGC	4816	GCTCACCC	948	TGCCCCCCG	587
		GAATT	17781	TACATA	7878	CTTCCTC	4813	ATAAAACA	948	CCCCACGCA	587
		ATTCG	17760	TCAACT	7876	TTCCCTC	4811	AAAACTAA	947	AGTCCCCCC	586
		TTTCT	17729	GACTAC	7875	GCAACCC	4808	CCTCTCGC	947	TGCCGCCCC	586
		TAGCT	17703	CCTAAG	7874	TGCCCGC	4807	ACCACGCC	947	ACCCCCGTC	586
		TTCTG	17700	CACGTA	7871	CCGCCAG	4804	CCTACTCC	946	CCCCACAGC	586
		CGGTT	17692	GTACCA	7870	GCCCCAT	4801	GCAACCCC	946	CACCCCCGA	585
		AGTCT	17692	TACCAT	7869	GCACCTC	4801	CACGCCAC	945	AGCCCGCCC	585
		TCTTT	17599	ACATCG	7868	GGCCCGC	4799	GCTACCCC	945	ACACACCCC	585
		ATGGA	17594	ATCAAA	7867	CTCCCTG	4795	ATTCCCCC	945	GCACTCCCC	585
		GCAGG	17565	CTAGCA	7863	CCCTCTG	4795	TTAAAAAT	944	ACCCCAACC	584
		ATGAG	17541	CTACTT	7860	CCCAGTC	4794	CCCTTCTC	944	CGCCGCCCG	584
		GCGTT	17526	AGCCTC	7858	CCTCGCA	4793	TTTAAAAA	943	CCGCACGCC	584
		GGCTG	17508	TCACGA	7856	CATCTCC	4793	AACTCCCC	943	CCCCCGACA	584
		TTGCG	17499	TCACAG	7853	ACCCGTC	4792	CACCAACC	942	ACTGCCCCC	584
		GATGA	17497	ACAATT	7851	GCACGCC	4788	TTATAAAA	942	AGCCCACCC	584
		TTGAT	17467	CTTCTC	7845	ACCCCGG	4788	AATTAATA	942	CACCCCCTA	584
		GAGCT	17441	CCTTGA	7839	CCGCGGC	4786	TGACCCCC	942	CCCCACCTG	583
		TGGCG	17431	AAACAG	7839	CCCCGTA	4784	CCTCCACT	941	CCTGCCCCA	583
		GTGCG	17410	CTCTTC	7831	GCGCCCT	4783	TCCTCCTC	941	CTGCCCCCA	583
		TGAAG	17392	TCAAAA	7830	TCCCCTT	4782	AAATACAA	940	CCCCTCCGG	582
		GTGCT	17384	AACTTC	7830	TCCCGAC	4778	CCCCGCTA	940	CCCCGGCAC	582
		GAGTA	17378	TAGCCC	7829	GCCACCG	4775	GCCTCCAC	940	CCGCCCTAC	582
		GCGGG	17371	CGTCCA	7829	GCCCCTT	4768	TAAATAAT	939	GACCTCCCC	582
		AGATT	17362	GGCCGC	7825	GCCTGCC	4765	ACCCCTCT	939	CGCCCCACG	581
		GTTCT	17335	CTTAAA	7823	CCTCTTC	4765	AATTATAA	939	TGCCCCACC	581
		GTCTG	17333	TCCGAC	7822	ACCGCCG	4764	ACAAACAA	938	GCTCCCCCG	581
		TCAGG	17322	ATCGCC	7815	CCCGGCT	4762	GCCCGCAC	938	CCCACCTCA	580
		GATCG	17315	GTACAC	7807	GCGCCGC	4756	ATACAAAA	938	CCGACCCAC	580
		AATGT	17305	ACAAAG	7805	CTGCTCC	4756	GCCCTCCA	937	CCCACACAC	579
		AGTTA	17267	CCAGGG	7804	CTCGCCT	4756	CGACCCCA	936	AGCCGCCCC	579
		GGTCT	17263	TATACA	7801	CGCGCCG	4754	AACCCCCT	936	CGCCCCCAG	579
		ATTAG	17245	CGCAGC	7796	CCCCAGT	4748	CCGCACCA	935	GCCCCACTC	579
		GTGAT	17243	TCATAC	7795	TCTCCCA	4746	CTTCCCTC	935	GACCGCCCC	579
		GCTTT	17242	ATATCC	7790	CCTCCAG	4742	AATAATAT	934	GGGCACCCC	579
		TGCTG	17189	CCCGGT	7790	ACTCTCC	4742	CCATTCCC	932	ACCCCAGCC	579
		CGAGG	17185	TACATC	7788	CGCCTGC	4739	TAAAAATT	932	CCCCGCCAG	579
		TTATT	17174	CAATTC	7787	GCCCATC	4739	ACCCCGCA	932	CGCCACCGC	578
		TGAGA	17165	GGCCTC	7787	CCTTCGC	4736	CTCCCAAC	932	AGGCCCCCA	578
		TGTAT	17118	AGCCGC	7787	CCGCTGC	4736	CCGACCCT	932	CCCGCCAAC	578
		TGCGT	17107	GAAACA	7784	TCCGCCA	4731	CTACCACC	930	CCCGCACCA	577
		GTAAG	17105	CAGCAA	7778	GCACCGC	4730	AATAAATT	929	GCCACCCCT	577
		CTTGG	17102	CCGAAA	7772	CCGATCC	4728	TAATTAAA	929	GCCCCAACC	577
		TTGCT	17087	CATCAT	7772	GCGGCCC	4723	ACAACCAC	929	CCCGCCCAA	577
		AAGTT	17080	CAGCGC	7770	CGCCATC	4720	CCGCTCAC	929	CCGCCCCTA	577
		GCGGT	17054	AACTCT	7768	AACCCCG	4718	TCCAACCC	929	CCCCACGCG	577
		TATTT	17024	GACTCA	7764	CGTCCAC	4717	TACCACCC	928	CCGCCGCCA	576
		GGGAG	17013	TTCTCC	7761	TCAGCCC	4715	CCTATCCC	928	ACACCCCAC	576
		TAAGT	17004	TCCTGC	7756	CAACACA	4714	GCCACCCA	928	TGCCCCCTC	576
		CGGTG	16998	TCTTCC	7752	CCCCAAG	4714	CCTGCCCA	928	CCCGCGCCG	576
		AGGTA	16955	TCCATA	7751	CGCCGGC	4709	ATATAATA	928	GCCTCCACC	576
		TCTGT	16929	CCAGGA	7745	GCCCCGA	4707	CCACGCCT	927	CCCCCCATA	576
		GTTAT	16819	ATCTAC	7744	CCGGCCG	4705	CCCACCTG	926	GCCCTCCTC	576
		TTTGA	16759	CTGCCG	7743	CGCCCGA	4704	CATCACCC	926	TGCCCCCAC	576
		ATAGT	16733	TTACAA	7739	CTCCTGC	4700	GATAAAAA	925	CCCGCCAGC	575
		AATTG	16684	CAATGC	7739	TCCAACC	4698	AACCGCCC	924	CCCCCAGCA	575
		GCGTG	16679	TCCCGG	7738	CGCCAGC	4697	CCCTACGC	923	CGACCCACC	574
		GTAGA	16653	CAACGG	7736	CCCGTGC	4694	CCGCCCAT	923	TGGGCCCCC	574
		GCTGT	16636	AACAAG	7736	AGCCCTC	4690	CAAATAAA	923	GCACCACCC	574
		TGTCT	16625	CAGTCC	7724	CATCCGC	4688	ACACCCTA	922	GTCCGCCCC	573
		AAAGG	16607	ATACTA	7724	CGCCGCA	4688	CCCCAGAC	922	ACCGCGCCC	573
		GGAGA	16596	AAGCCA	7721	TTCCGCC	4685	CATCCCCA	922	CCGTGCCCC	573
		AGTGA	16565	ACTGAC	7720	GCAGCCC	4684	CTACCCGC	921	CCCCCCTAA	573
		TTGTA	16533	GGCACA	7719	ACACAAC	4682	ATCCACCC	921	CCACGCCGC	573
		GGTAT	16500	GCCCGG	7717	CCAGCCG	4681	TCCCTCGC	920	GCCTACCCC	572
		GTTTA	16494	AGCCAA	7714	CGCCTCA	4679	AAACAAAC	919	CCCACCTAC	572
		GAATG	16449	ATAACT	7711	CTCTTCC	4679	CCTCTACC	919	CCCGCCGTC	572
		GTGTA	16420	GGCCCG	7708	CCCCTAG	4678	ATATTAAA	918	CCCGCACGC	572
		AGCGG	16407	CAATCT	7707	CCATCGC	4677	AATATAAT	918	CCCCCTCGG	572
		AGTCG	16406	GAGCCC	7706	AGTCCCC	4675	TATAAATA	918	CCCTCCCGG	572
		GTCGT	16404	TCATCA	7702	CCCTGCT	4675	AACAATAA	917	GCGGGCCCC	571
		GGAAG	16395	AGCGCC	7702	ACCCGGC	4666	ATATATAA	916	CGGGCCGCC	571
		GATAG	16391	GCCTGC	7699	TCTCCAC	4663	CCCGTCAC	916	ACACCCCGC	571
		TAGAG	16373	ATACAT	7699	CCGCTTC	4662	CTCACCCA	916	CCGCCTGCC	570
		ATCGG	16362	CCATTT	7698	ACGCGCC	4658	CTCCCCTA	914	CACCCCGCG	570
		CGTTG	16340	TTCCGC	7690	ACCCCGT	4654	CCCGACTC	914	CGCCGCCGC	570
		GGCGG	16274	GACAAA	7683	GCCAGCC	4651	TCAGCCCC	914	ACCCCTGCC	570
		GTATT	16258	CGCTCA	7681	CCGTCGC	4651	TTAAATAA	913	CCCAACACC	570
		TCTTG	16218	GGTCCC	7661	GCCGCGC	4650	ATATAAAT	913	CACACCGCC	569
		TAGGA	16168	CCAAGG	7655	CCAGTCC	4648	ACAAAAAC	912	CCCACCGTC	569
		TGGAT	16168	ATCCAT	7654	CCCCTGG	4647	TCCCTACC	912	CCGGCCCGC	569
		TCGTT	16160	ACATGA	7636	TCCCCGA	4643	AAATCAAA	912	CCAGCCCCA	569
		ATTTT	16142	ACCAGG	7636	CGCTGCC	4641	AAAAACAT	911	CCCGCGACC	569
		GCTTG	16040	CGACTA	7634	CGCAGCC	4636	AAATATTA	911	CCGCACCCA	568
		GGGGA	15983	CATCGA	7632	CCCTCAG	4635	CTGCCCAC	910	CCCCAACCA	568
		TGATT	15884	ATAAAC	7628	TCCCTCA	4632	ACAACAAA	909	CGCCCCCTG	567
		CGTGG	15874	GCCTAA	7624	CTTCTCC	4629	AATATTAA	908	CACCCCCAA	567
		AGATG	15839	AAACGA	7615	CACACAA	4627	GCTCCCCA	908	CACCCCTAC	567
		TTATG	15800	CTAAGC	7614	CCTCCTG	4626	TCCCTCCT	908	CGCCCGCCG	567
		TGTTA	15790	CTGGCC	7609	CTTCCGC	4622	CCCACACG	908	CCACCCGCG	567
		TCGGG	15751	CTCTCT	7608	CCCGCTG	4621	CCTCTCCT	907	CCCCTCACA	567
		ATGTT	15728	AACATT	7606	CTACACA	4619	AAAAAACT	906	CCCCCACAT	566
		GAGGA	15706	GTGCCC	7606	CCCGATC	4619	CCTCCTCA	906	CCACACACC	566
		TTTAG	15698	TCAACG	7603	CGCCTTC	4618	CCTTCACC	906	CACGCCCAC	566
		GGTCG	15674	AAGACC	7600	CGCGCGC	4617	GACCCCTC	905	CCCCCACGT	566
		TTCGT	15671	GAACAA	7599	TGCCCCG	4616	ACTCACAC	905	CCACCGGCC	566
		GAGAG	15670	CTACTG	7599	TCACGCC	4614	ACCCTCCG	905	ACCACCCAC	566
		GGATT	15662	GCACAG	7597	AGCCGCC	4613	CCCCCAGA	904	GACCCCCCT	566
		AAGGT	15637	CGCAAA	7596	CCCGGTC	4612	ATAGAAAA	904	CCCGCGCCA	565
		CGTTT	15595	ATACGC	7594	GCCCTCA	4611	CCCTCATC	904	CCGCCACAC	565
		GAAGT	15576	CTTCGC	7594	CTCCGGC	4605	ACACTCAC	904	CCCCCGGTC	565
		AAGTG	15541	CGTACA	7592	CTCCCAG	4601	CCCCCTAT	904	CGCCACACC	565
		TCGTG	15541	GGACCA	7589	CTCCTTC	4601	AATTAAAT	904	CCCACCGGC	565
		TGTCG	15522	ACGTCC	7584	ATCCTCC	4600	CCCCTTCA	904	AGCCACCCC	565
		AGAGT	15512	GCACGA	7573	GCACTCC	4595	CATAAAAA	904	GACACCCCC	565
		TCGGT	15489	AACCAG	7573	CACCGCG	4595	CCACCCGG	901	CCCGCCGGG	565
		GTTCG	15485	CTCAAT	7560	CCTCGGC	4592	AAACACAA	901	CGCCCTGCC	565
		TTGAG	15463	CAAAAC	7559	CACCTCG	4587	TAAGAAAA	900	CCCCCATGC	565
		GCTGG	15446	GCTGCC	7557	ATCCCCG	4585	CCTCCCAG	899	CGCCCACCG	565
		GGTTA	15446	AACTTA	7553	GATCCCC	4582	ATAAAATT	899	CGCCCCCTA	564
		GTTGA	15426	TATCCA	7552	TGCCTCC	4581	TAAAAACA	899	CCGCCGCCG	564
		TATGT	15415	GCCGCG	7551	CCGCTCA	4580	CCAGCCTC	897	CGCGCACCC	564
		TGTGA	15414	CAAAGA	7549	GCCGCCT	4575	CCACCGCA	897	GCCACCTCC	564
		GGGTT	15403	ACCTTT	7543	GCTCCAC	4574	AGCCCCTC	896	CCCGCCTAC	564
		AGGAG	15371	GAAACC	7542	ACTCCGC	4572	ACGCTCCC	895	GTCCCCCAC	563
		GATTT	15365	TGTCCC	7541	CCGTTCC	4572	AACTAAAA	894	CCACACCAC	563
		GTGAG	15318	GACCAT	7536	CACAACA	4570	CGACACCC	894	CGCCTGCCC	563
		TGCGG	15249	TAACTA	7535	CCCGCGG	4566	ATCAAAAA	893	CCGACGCCC	563
		GGTGA	15248	ATATAC	7535	TCCGGCC	4565	GCACCCGC	893	CCCTACCCA	563
		AGTAG	15220	GCCATA	7534	TCCCATC	4563	TCTCGCCC	893	CCCCCAGCG	563
		TTTCG	15219	CCAAGT	7534	ACCCGCT	4562	AAAAGATA	893	CAGCCCCCA	563
		TTCGG	15191	AATCCT	7525	CGGCCTC	4558	TGAAAAAA	892	CCACACGCC	562
		TCTGG	15165	ATCTCA	7520	TCACTCC	4557	CACCCCGA	892	TCCGCCGCC	562
		ATTGT	15019	AGACAA	7518	TTCGCCC	4553	AATAAAGA	891	GCCCGCTCC	562
		TAGTT	14958	TACTAA	7507	TCCCCAT	4548	AGATAAAA	891	GACCCCTCC	562
		TGGTA	14911	GCTTCC	7502	CCGCCGT	4547	CAACCCGC	891	GCCTCGCCC	562
		GTGGA	14906	GATACC	7499	CATCCCG	4546	TACCCCCT	891	CCCACAGCC	562
		GTCGG	14834	TTCCTC	7498	ATCCGCC	4545	TAATATAA	891	GCTCCCACC	561
		TGGGA	14802	CGCCTT	7495	CGATCCC	4545	CCTGCCTC	890	TGCCCCCCT	561
		TTGGA	14782	AGACCT	7492	CCATCCG	4542	AGTAAAAA	890	CGGGCCCCA	561
		CGGCT	14669	CCTGCT	7491	GCCCAGC	4541	TCCCCACT	890	CGCACCCAC	561
		ATAGG	14664	TCTGCC	7489	CTCTCCT	4540	TATAATAA	889	CCCTCCCGA	561
		TAAGG	14647	CCTATT	7485	CAGCCCG	4540	AAGTAAAA	889	CCGCACCCG	560
		GTATG	14638	TAACGC	7485	CCCGCAG	4536	AGAATAAA	888	CCTGCCCCG	560
		ATGTG	14623	CTCAAG	7479	CCCAGCT	4535	ACCCACAA	888	CCACCACCA	560
		GGGCT	14605	GCCGGC	7473	CACTCGC	4534	GCCACACC	888	GCCAACCCC	559
		AATGG	14575	CCTATG	7470	TCCGACC	4531	TACTCCCC	888	CCAGCCGCC	559
		ATTTG	14570	CCGTGC	7465	ACCGTCC	4527	CCCCTCTG	887	CCCCCATAC	559
		AGGGT	14558	TACCAG	7454	AACACAC	4524	AAATTTAA	887	CGCCGCCCA	559
		AAGGG	14524	CTGTCC	7453	TTCCACC	4524	TCCCGCTC	887	GCTTCCCCC	559
		GGATG	14457	ACAGAA	7451	CCCCTGT	4523	CTCCACTC	886	CGCCCACAC	559
		GATGT	14435	TACGCA	7447	TCGGCCC	4523	TATCCCCC	886	CACCCCAAC	558
		TTAGT	14408	CGCCGG	7445	TTCCCGC	4521	AGCCACCC	886	CCCGTCGCC	558
		GGGTG	14399	GCAAAC	7443	GCCCGCA	4516	TCCCACCA	885	GCCCCATCC	558
		TATTG	14388	CCCGTT	7442	CCCGCGT	4516	GCCCCCGA	885	ACCCCGCCA	557
		TGATG	14350	CTCGGC	7441	TCACCGC	4516	AAAGATAA	885	GGCCCCGGC	557
		TTTTT	14281	CACTTG	7441	TCCCGCA	4515	ATTATAAA	884	CCGCACACC	557
		ATGGT	14237	CAATAT	7439	CACACTA	4511	ACAAAACA	884	CCGCCACCA	557
		GGGGT	14236	AGAACC	7437	CGCCCTG	4505	CCACTGCC	884	ACCCGCCCA	556
		GTTAG	14233	CACTTT	7431	CTCCTCT	4500	TACAAAAA	883	CCACCCCAG	556
		TGGAG	14185	AAACTT	7429	GCCCGGC	4497	AATAATTA	882	CCGCTGCCC	556
		GAGTT	14164	CTAAAT	7428	GCGCCCG	4495	CCCTAACC	882	CCCCCTCAA	556
		TGTAG	14122	TGGCCC	7427	CGCTCAC	4494	ATAAATTA	882	CCCTCACAC	556
		AGGCT	14052	TGACAC	7426	CCCCGGA	4494	CCCCCTTT	881	CGCACCCCA	556
		GGTAG	14022	ATATAA	7425	CCACGCG	4489	AAGAATAA	880	ATGCCCCCC	555
		TGAGT	14012	TAACTC	7424	TGCTCCC	4487	CCCCATTC	880	TCCCCCCGA	555
		GATTG	13933	ACTAAT	7417	GCATCCC	4487	ATCCTCCC	880	GCCTCACCC	555
		AGTTT	13882	AAGCAC	7409	CGGCCCT	4486	CCATCCGC	880	CCATCCCCC	554
		AGGTT	13878	TGCCGC	7407	GCACCCG	4484	CCACTCCG	879	CGCCGGCCC	554
		GGAGT	13877	CGACAT	7402	TCCTGCC	4483	GCACGCCC	879	TGCCACCCC	554
		TAGGT	13734	AACTGC	7398	GCTTCCC	4482	CACATCCC	879	CACCCGGCC	554
		GTAGT	13672	CTCAGA	7397	CGCATCC	4479	AACAAAAT	879	TGACCCCCC	554
		TAGTG	13643	CTGCCT	7395	TCCACCT	4475	CTTCCCCA	878	CCCAACCCA	554
		GAAGG	13612	TAAAAA	7391	ACCTCCG	4475	AAATAATT	878	ACCGGCCCC	554
		AGTGT	13609	CTCGCG	7384	CCGCGTC	4474	TCCCCTCA	878	GTCCCCCCA	553
		GAGGT	13551	ACGAAC	7380	CTCGCCG	4469	CACTCCCA	878	CCCCCATCA	553
		TTGTT	13523	CGTGCC	7379	CGTTCCC	4467	CCTCGACC	877	CCGCACCGC	553
		GTTTT	13452	TCCTTC	7377	TCCCACG	4466	AAGATAAA	877	ACCTCCCCA	553
		GAGTG	13401	CCTCGT	7376	CTCTCTC	4465	TCGCCCCA	877	CGGCCTCCC	553
		GTGTT	13349	CCGCTG	7374	CCTGCTC	4464	ATTAATAA	877	TGCCCGCCC	553
		TATGG	13094	CCTAGG	7372	GCGCCTC	4459	TCGCCCTC	877	CACCACCCA	553
		TTTGT	13029	ATTCAC	7369	CCCTGCG	4446	AAAAATCA	877	CCCCCGTGC	553
		ATGGG	12987	CTCTCG	7365	TCATCCC	4446	ACCAGCCC	876	CCCCCGCGA	552
		TAGGG	12944	TCTCCG	7365	TTCCCCG	4443	ACCTCTCC	876	ACCCGCCAC	552
		TTTTG	12913	AACCGT	7365	ACCTCGC	4442	ACCCCCGG	875	CCCCCCAAG	552
		AGGTG	12879	ACCGTA	7361	TCTCACC	4441	CCTACCCG	875	CCACCCTCA	552
		GCTCG	12799	AAAGCC	7342	CTTCCCG	4440	TCCCAACC	875	CCCTACACC	552
		TGGCT	12744	AAAACG	7341	CCGCGCT	4440	CCCTCACT	874	CTCCCCGAC	551
		TTGTG	12721	CAAAAG	7338	ACGCCCG	4439	CCAACCCG	874	CCCCCCTTG	551
		AGAGG	12699	ATCACG	7338	CCTTCCG	4436	CTACGCCC	874	CCCCACACT	551
		GGTGT	12648	TTTCCC	7336	ACCCTCG	4435	CCCATCCT	873	CCCCGCACG	551
		TTAGG	12645	GACCGA	7334	TCTTCCC	4434	ATAAATAT	873	CCCCCTCGA	551
		GATGG	12635	TCCTCT	7333	GGCTCCC	4429	CAAAAATA	872	GACTCCCCC	551
		TGTGT	12634	TTCCAA	7331	ACCGCTC	4429	CCCACCGT	872	CCTCCCGCG	550
		TGTTT	12633	AAAAAT	7325	CGTCCCA	4428	GAAATAAA	872	ACCCCCCAT	550
		GAGGG	12621	CCAGTA	7322	ACTCCCG	4426	CCACACAA	872	ACCCCTCAC	550
		GTGTG	12593	CACGAG	7320	CTCGCGC	4425	AAGAAATA	872	CACCACACC	550
		ATTGG	12562	TCTCCT	7315	ACTACAC	4425	CACTACCC	872	GCCCGGGCC	550
		AGTTG	12538	CACGGA	7314	CAACAAC	4425	AAAGTAAA	872	CCCGCGCGC	550
		GGTTT	12536	TAACAT	7311	GCCCTGC	4419	GACCACCC	872	ACCCCCACT	549
		AGGGG	12481	ATGACC	7296	CTCCCGT	4416	TACCCCGC	872	ACCCCACGC	549
		TGGGT	12356	CGGGCC	7296	AGCCCGC	4414	TAAAATTA	872	CGCCACCCA	549
		GTTGT	12295	ATTCCA	7295	TTTCCCC	4408	ACACCACA	871	CCCCGCCTG	549
		TGGTT	12255	GTAACC	7293	CCCAGCG	4405	AAAATACA	870	ACCCCCGGG	549
		GTGGT	12236	ACCTTG	7292	TCCTCCA	4400	CCCCTACT	870	ACCACCGCC	549
		TTGGT	12212	GCATCA	7291	GTTCCCC	4398	GAATAAAA	870	ACGCCCCCT	549
		GTTTG	12150	TGCCTC	7288	GCTCCCA	4391	CTACCCCT	870	CCGCCCAAC	548
		TGAGG	12129	TACAGC	7279	ATCCCGC	4388	CCCTCCGA	869	CCACCCCTA	548
		GGTTG	11931	CTGCGC	7275	ACAACAC	4384	CTCCCACA	869	ACTCCCGCC	548
		GTAGG	11904	ACTCGA	7272	CGCTCCA	4383	CTTACCCC	869	CGCGCCCTC	548
		GGGGG	11881	AACTAT	7269	CTCCGTC	4377	GAAAAATA	869	AGCCCCTCC	548
		TGTTG	11818	TTACCG	7257	TCACCCG	4374	CCTCGCCA	868	CACCCCGGC	547
		TGGTG	11754	TATCAC	7257	CCAACAA	4372	AGTCCCCC	868	GCCCAACCC	547
		AGTGG	11749	CAAGAA	7256	CCCGTCT	4370	AAAAATGA	867	ACCGCCCCG	547
		GGAGG	11600	CATAAT	7255	AGCCTCC	4367	GCCCCGAC	867	GGCCCGGCC	547
		TTTGG	11577	CATAGC	7246	CCTCCGT	4364	AAATTAAT	867	GCTCCACCC	547
		GTGGG	11365	TTACCT	7242	CGCCCGG	4356	ATAAGAAA	865	CCCTCCACA	546
		TTGGG	11176	CCATTG	7241	GCCGCCG	4355	CTCACCTC	865	CCCCCCTAG	546
		GGTGG	10931	GCGCCG	7235	TCGCACC	4354	CCTCCTTC	865	CCCCGGCCG	546
		TGTGG	10918	TCCGCG	7234	CCTCTCT	4352	TTAATAAA	865	ACCCGACCC	546
		TGGGG	10891	TCCTCG	7234	CGGCCGC	4352	AAAGAAAT	863	ACGCCACCC	546
		GTTGG	10753	CATCAG	7233	CCCATCG	4342	CACTCCTC	862	CCCGCTGCC	545
				TCCCGT	7233	CCCCGAT	4342	ACCGCCCT	862	CCGCACCAC	545
				CTATGC	7229	ACTCGCC	4341	AACCCTCC	861	CCCCCTGTC	545
				CCTTAT	7225	ACCCGCG	4337	TAAATTAA	861	TCCCCCGAC	545
				TCATAA	7223	CGCTTCC	4335	CCCCATCA	861	CAGCCCCCG	545
				CTTACT	7221	CTCCCGG	4331	TGCCCCTC	861	CCTCCCCGA	544
				GCATAC	7218	GCCCCTG	4330	AAAATCAA	861	ACCCCTCCA	544
				GACATC	7208	GCGTCCC	4330	ATAAAAGA	860	CCCCACACG	544
				GTCACA	7206	CCCTTCG	4329	CCCCGCAA	860	GACCCTCCC	544
				TACGAC	7206	TCCCCTG	4326	TCCCGCCA	860	CCCTCCGCG	544
				GCAACG	7203	CCTCCGG	4326	CTCCCCAT	860	GCGCCCGGC	544
				CAAGCG	7199	AGCCCCG	4318	AGAAATAA	860	CCAGCCCCG	544
				CAAATT	7197	GGGGCCC	4318	CTTCACCC	860	CCCCACTGC	544
				GAACCT	7188	GCTCACC	4317	TCGCACCC	859	CGCCACCCG	543
				ACGCTC	7187	GTCGCCC	4315	GCACCTCC	859	CCTGCCCAC	543
				CGCTGC	7186	CTAACAC	4312	CCCGACGC	859	ACCACACCC	543
				ACTAGC	7174	CGCCCAG	4306	ACTCCGCC	859	CCAACCCCC	543
				CGATAC	7168	CCGCGCG	4304	TAATAAAT	859	ACCGCCACC	543
				ACAGCG	7163	ACGCTCC	4301	CACCCTTC	858	TCCGCCCCG	543
				CCGCGG	7163	CCCGTTC	4299	AATAGAAA	858	ACGCACCCC	543
				CCGCTT	7161	GCCCCGG	4298	CCTCACCG	857	ACACCCCCT	543
				TACCTT	7160	TCCCTTC	4297	CCGCGCAC	857	CACACCCAC	543
				TCGCAC	7154	TCCGCCT	4296	GAAAAAAT	857	CCTGGCCCC	542
				GGACAC	7152	CCACTCG	4291	CACCCGAC	857	CCCGACCCT	542
				CACGAT	7145	TTCCTCC	4282	CACCTACC	856	CCCCGACGC	542
				TGCGCC	7138	TCCACGC	4279	CCCCTCAG	856	ACCCCGACC	542
				CTCTTA	7132	ACCAACA	4273	CACCCTCA	856	TCACCCCCA	542
				ACGGCC	7130	GCCCCAG	4265	TCACCGCC	856	ACCCCGCGC	542
				TCCGGC	7129	CTCCGCT	4264	CTCACACC	856	TCCCCCCTA	541
				TCTCAA	7124	CCCTCGG	4263	CCGCCTAC	855	CGCCCGCCA	541
				GTTCCC	7123	CCCCGTG	4259	ACCCTGCC	855	GTCCCGCCC	541
				CGCTAA	7121	GGGACCC	4253	ACTTAAAA	855	TCGCGCCCC	541
				GCTCCG	7121	CCGTCTC	4251	CAATAAAA	854	CCCCGCGTC	541
				AATTCC	7120	CTACAAC	4250	CCCACCAG	854	CTCCCCGCA	541
				CTCCGT	7119	TCGCGCC	4243	AAAAGTAA	854	ACCGCACCC	541
				ATATCA	7119	CTCCGCG	4228	TAAAGAAA	854	ACGCCCTCC	540
				CTTACG	7117	AACACCA	4227	ACCGCCGC	854	CCGCGACCC	540
				CAGAAC	7116	CCAAACA	4224	CCCGCCTA	854	CACGCCGCC	540
				GCCTCT	7108	CACTACA	4217	AAAAGAAT	853	CCCTCCGGC	540
				CCATGG	7098	CCTCGTC	4216	GCTCCCCT	853	CCTCCCGAC	540
				AGCTCC	7097	CCCCGTT	4212	CAACGCCC	853	CCCTACGCC	539
				TTTACC	7096	CGTCGCC	4208	ACCTCCCG	851	CTCCCCGCG	539
				ACGCGC	7095	TCCCAGC	4207	GAAAATAA	851	GCTCCGCCC	539
				CAAGGC	7093	CAAACAC	4204	AAAAAATG	850	CCCCACCAA	539
				ACAATG	7091	CGCCGCT	4190	CCCTTCCA	849	ACCCCCCGT	539
				GACGCA	7087	GCCTCCT	4181	AAAATGAA	848	GCGCCTCCC	539
				CGCATA	7086	CACACAT	4175	AAATAAGA	848	CCAGCCCGC	538
				CGACAG	7086	CCAGCTC	4174	CCACAGCC	847	CCACCCTGC	538
				GCAACT	7085	GCCTCTC	4172	AGAAAATA	846	CCCCTCGAC	538
				GGCCAA	7083	GCCATCC	4171	CCAACGCC	845	GCCCATCCC	538
				AAAATC	7082	TCCCGGC	4166	CTCCTCTC	845	CGCACCACC	538
				CTTTAC	7082	ACCACAA	4163	CCCCAAGC	845	CCCGCCGCT	538
				ACCGAT	7078	ACACCAA	4158	GCCGCCAC	845	CGCCCACCA	538
				CTTCTA	7074	TCCACCA	4154	CATCTCCC	845	GGCGCCCGC	537
				CAATCG	7074	AGCTCCC	4149	ACGGCCCC	845	GCACCTCCC	537
				TAATCC	7071	CCTAACA	4137	AAGCCCCC	844	GGGCCCACC	537
				ACCTGT	7065	TCCCTGC	4131	AAAATATT	844	CCCCGCGGG	537
				ACTCAG	7064	GTCTCCC	4130	AAAAATTT	844	ACCGCCCCT	537
				AGAACA	7058	TCTCCCT	4126	CCATGCCC	844	CCCTGCGCC	537
				CGATCA	7056	ACACCTA	4124	CCAACAAC	843	CCCAACCAC	537
				GCCCTT	7055	TCCTCCT	4123	CCTTCCCT	843	GCCTCCCTC	537
				CCGGCG	7053	CCCCGAG	4122	TCTCCACC	843	CCCCCACTG	537
				CGACGA	7050	AACCACA	4121	TCCCACGC	842	CCGACACCC	537
				TCCAGC	7047	CCCCGGT	4118	CACCCACT	841	CCCCACCGT	537
				ACTTCT	7046	CTCTCCG	4112	AAAATTTA	841	CCCCCCTGT	536
				GCCTCG	7030	CGCCGTC	4110	TAAAATAT	841	CCTACCCCA	536
				AATACT	7024	CACAAAC	4109	GCCCCACT	840	TTGCCCCCC	536
				CCGATA	7020	TCCCCGG	4107	TCCATCCC	839	CGAGCCCCC	536
				CTAGGC	7017	TCCGCCG	4099	ATACAATA	839	CGCCCCAAC	535
				CGATAA	7009	TCCCCAG	4099	ACACACAA	838	CCTCCCGGC	535
				CGCGCG	7003	CCTACAA	4093	TCCGCCTC	837	CCCCCTCTA	535
				TGAACC	7000	TCCACTC	4091	CGACCACC	837	CGCGCCCCT	535
				ACGACT	6999	CGCGCTC	4087	GTCCCCAC	836	CCCACCCAG	535
				AACATG	6985	CGCCGCG	4084	CCTCCCTG	835	TCGGCCCCC	534
				AAGACA	6979	CCCGTCG	4082	GCGCCCTC	835	CGCCCCGCT	534
				TCTAAC	6977	CATACAC	4080	TAAATAAC	835	GCCCCCGGA	534
				TCTCTC	6975	CCGTCCG	4080	ATCCCACC	835	ACCTCCCAC	534
				AACGAA	6974	TCGCCCT	4078	ACCGTCCC	835	ACACCCACC	534
				GACAGC	6973	TCTCCTC	4076	ATAATATA	834	CCCCGACAC	534
				CGAAAC	6967	GCCCCGT	4050	ACAACCCA	834	CCTCCGGCC	534
				ATCCGA	6964	CCACATA	4050	AACGCCCC	833	CCGCCACCG	534
				TAACAG	6962	TCGCCTC	4033	CAAAATAA	833	CCGGGGCCC	533
				ACGTCA	6961	ACCTACA	4024	TAGAAAAA	833	CCCCGCTGC	533
				TTCAAC	6947	GCCGCTC	4015	ATCCGCCC	833	CCGCCCCGT	533
				GCGACA	6942	TCCTTCC	4015	TTAAAAAC	831	CCACCACGC	533
				GGGGCC	6941	GCCCGCT	4014	CCCATCGC	831	CCCCTCGGC	532
				CTATTA	6941	CAGCTCC	4005	TCCCCTTC	831	CCGGTCCCC	532
				CACGGG	6940	ACGACAC	4005	TACCCACC	831	CCCCTGACC	532
				CCATGT	6938	TCCTCTC	4004	CCCACCGG	830	CCCGCCACG	532
				TCGACA	6931	CCGTCCT	4003	GTAAAAAA	829	GCACCCTCC	531
				ACTCTT	6931	TCGCCGC	3999	CCGACCGC	829	CACCCACCA	531
				TACCTG	6928	TCCCGTC	3995	GCCCTACC	829	CTGCCGCCC	531
				ATAATA	6926	TCCCTCT	3989	CCTCGCTC	828	ACCCCACCT	531
				ACGCTA	6925	CTCGCTC	3989	CACGACCC	828	CCCCCGCTG	531
				ATGCCA	6923	GCGCTCC	3986	CCTTCCGC	828	ACCTGCCCC	531
				CACTGT	6920	CAACCTA	3982	TCTCCTCC	828	CCACCCTAC	531
				CTTCCA	6911	CACGACA	3978	CCCCTAGC	828	CCCCACGGG	531
				CTCGAA	6891	CCCTCGT	3971	CAACCTCC	827	CCCCTGCGC	531
				CCAGAG	6884	TCCGCGC	3970	ACCAAAAA	826	CCCCATGCC	530
				GACCAG	6880	TACACAC	3969	CCCAGACC	826	CCAGCCCAC	530
				AAAGCA	6879	CCTCGCT	3956	TAAAAGAA	826	CCCCTAGCC	530
				AATATA	6878	CCTCGCG	3946	TCCGACCC	826	ACGCCGCCC	530
				AGACCG	6877	CTCTCGC	3945	CCTCCCGT	826	CGCCGCCAC	530
				CAATGA	6877	CTGACAC	3944	CCTTCCAC	826	TCGCCCCGC	530
				TCAAAC	6872	TCCCGCT	3943	GCCCCATC	825	ACACCACCC	529
				ACCGAG	6872	CTTACAC	3942	GGCCCCAC	825	CGCACCCCG	529
				GACGAC	6872	CCATACA	3941	CCAAGCCC	825	GCCCCCAGG	529
				CTACGG	6869	TCCCCGT	3937	ACACCCAT	824	CGCCACCAC	528
				TCAGCA	6868	GCCCTCT	3936	ACCCAAAC	824	TACCCCCCA	528
				CCTGTA	6865	GCCCTTC	3925	CTCCCCTT	824	CCCAGCGCC	528
				ACCGGA	6860	CCTAAAC	3925	AAAAAGTA	823	CACACCACC	528
				AAAAAC	6859	CGTCCGC	3919	TCCCACCT	823	CGGGCCCCT	528
				ACATAG	6847	GCCCGCG	3918	AATGAATA	822	GGCGCCGCC	528
				AACCGG	6844	CATACCA	3915	AACCAAAA	822	TCCGGCCCC	528
				GACATA	6843	GCTCCCT	3911	ACCCCGGC	822	GGCCCCCGA	527
				CTTGCA	6842	CGCGTCC	3910	AGCCCCCA	821	ACCCCACCG	527
				CTACGT	6842	CAACACT	3906	ATCCCCCT	820	ACCCTCCCA	527
				CCGTAA	6840	CTCAACA	3904	AAAAAAGT	820	CCCCCGAGC	527
				ATCATC	6840	ACACTAC	3902	ATAATAAT	819	TCCCCCGCA	526
				CGCTTC	6837	TCCACCG	3902	CCGCCCTT	819	CCCTCCGCA	526
				CGTTCC	6834	CACCATA	3900	GCGACCCC	819	TGCCCACCC	526
				ATACGA	6830	AACACCT	3898	TTTCCCCC	819	CGCCCCCAA	526
				CTCATG	6829	CACTAAC	3888	TCCCCCTG	819	CCACCACAC	526
				ACGACG	6826	CGCCTCT	3888	CCCGCCTT	819	GCCCGTCCC	526
				GATACA	6825	CCAACTA	3887	CCGCCCGA	818	CCCCGAGCC	526
				TGCTCC	6822	ACCAAAC	3883	GGGCCCCC	818	CCCTCTGCC	526
				ATAACG	6822	TCCATCC	3880	TCCACCCT	818	TACCCCCGC	526
				CTGCAA	6818	ACCTAAC	3878	CCTCCAGC	817	GCCGCCCGG	526
				GACCTG	6817	CGTCCCT	3876	CACTCACC	816	CCCACCCTG	525
				ATCTAA	6806	ACACACT	3873	TCCTTCCC	815	CCCCCCAGT	525
				TGCCAA	6797	AACCAAC	3861	CCCTCGAC	815	GCTACCCCC	525
				CAAATG	6796	CACATAC	3859	CTCTCCAC	815	CCCCCTAAC	525
				TAATAA	6795	CCATAAC	3855	CCCCGCTT	815	CCCTGCCCA	524
				CATCTT	6795	GCCTCCG	3851	AATAAGAA	814	ACCGCCCTC	524
				ATACAG	6794	CCAAAAC	3851	CCGCACGC	814	GCCCTCCCT	524
				GCAAAA	6794	TCGCCCG	3846	CCGCACCT	813	AGGGGCCCC	524
				CTGAAC	6790	GACACAC	3846	CCCACTCT	813	GCTCACCCC	524
				GATCCA	6788	CACACTT	3832	ATAAAGAA	813	CCCCCGCAG	524
				ACAGTC	6782	CCTCTCG	3823	ATAACATA	813	CCCCAGCAC	524
				AATGCC	6777	CCAACAT	3814	ACCAACAC	812	CGCCCCTAC	524
				TCAATA	6775	TCCTCCG	3810	TAAAAAAG	812	CCCGCCACT	523
				TACAGA	6774	CAACCAA	3803	CCCTTACC	812	CACCCCCAG	523
				ATTCCT	6773	CTACCAA	3799	GCCAACCC	811	AGCACCCCC	523
				TCACTT	6769	CAGACAC	3794	CCCGCAAC	811	GCCCCTCTC	523
				GCTAAC	6768	CACAACT	3792	ATCCCCGC	811	GCTCGCCCC	523
				AACAGG	6766	ACAACCA	3792	AAAATAGA	811	GGCCCCTGC	523
				CCGTCG	6763	CAACTAC	3791	CTAACCCC	811	ACCCACCCG	523
				GCTCCT	6762	CTACCTA	3788	CGCACCAC	810	CTGCCCCAC	523
				AATTAA	6762	CGACACA	3786	CCTTGCCC	809	ACCTACCCC	523
				TAAACT	6762	TACCACA	3786	CTGCCCTC	809	GCCTCCCCT	523
				CCGTTC	6760	ACTACCA	3784	TCACACAC	809	CACACCCGC	523
				AGCAAC	6759	GCCCGTC	3783	CGGGCCCC	809	CTGCCCACC	522
				TAACGA	6755	CTCCTCG	3775	ACACAAAC	809	GCCCCTCCT	522
				ATCATA	6752	GGGTCCC	3769	ACAACACC	808	CCCCTACAC	522
				CGCGGC	6751	ACCCATA	3767	TCCCCCGT	808	GGCCGCGCC	522
				TCCAAT	6751	ACCCAAA	3765	TAATAAAC	807	CCGCCGACC	522
				CTTGAC	6750	GCCGTCC	3759	AATAAAAG	807	GTCACCCCC	522
				ACTTGC	6746	ACCACTA	3754	GACACCCC	806	CGCACCCGC	522
				TCACTG	6741	GCCTCGC	3754	CAGACCCC	806	CCTGCGCCC	521
				CCAGAT	6741	CGCTCCT	3752	ACGCCTCC	806	CGGGACCCC	521
				ACGAAA	6738	CTAACCA	3748	CCTACGCC	806	GCCCGCCGG	521
				TTACTC	6732	CATCACA	3747	AAATATAT	805	AGCCCTCCC	521
				CGAACT	6725	CGTCTCC	3744	AAATAGAA	805	ACTCCCCAC	521
				CATTTA	6722	TCCTCGC	3743	ACCGCACC	805	CCCCGGCCA	521
				GGGTCC	6721	TCTCCGC	3742	AAAAACAC	804	CCTCCCCAA	521
				GGCTCC	6721	TCTCGCC	3741	TCCACCGC	804	CCACCTGCC	521
				ACTTTA	6719	CTTCCAC	3739	TCCTCCCT	804	CGCCCGACC	521
				CTAAGA	6717	CACCTAA	3738	GCCCTCGC	804	GGCCCCGCA	520
				TCAATC	6713	CCACAAA	3730	CCAAAAAA	803	CCCTCGGCC	520
				CACTGG	6713	ACACATC	3727	AAAACAAC	803	ACCCCCTTC	520
				CACGTG	6709	TCCGCTC	3715	TCCGCCCA	803	GTCCCCACC	520
				AGCACT	6709	GCTCCTC	3707	GCTTCCCC	802	ACCACCACC	520
				TTACGC	6707	ATACACC	3704	GCCCGCCA	802	CTCCCCGGC	520
				CTATTC	6707	TCTCTCC	3698	CCAGCACC	802	CGCCGCACC	520
				TACAAT	6706	TCTCCCG	3695	CCCGCACA	802	GCCCCGGCG	519
				TTCCTA	6705	ATACCAC	3692	CCTGTCCC	802	TCCGCCCGC	519
				AAATTA	6697	CACCAAA	3690	GCGCACCC	802	CCCTCCCTG	519
				ACATTT	6695	GCTCCGC	3685	ACTACCAC	801	GCCCCTTCC	519
				AATCTA	6695	CTACACT	3682	AAACCAAA	801	GCCCCGCTC	519
				CCTTAG	6694	CCTTAAC	3680	ACTATAAA	801	CCCCACCAT	519
				AGCCTA	6691	CACCTTA	3679	AATACATA	801	CCTACCGCC	519
				TCCAAG	6690	AACCCTA	3678	ACGCCCCG	801	CGGGCCCAC	519
				GAACCG	6688	AACCCAA	3672	AAATAAAG	800	CACGCCCCA	518
				CTATCT	6688	ACGACCA	3670	AGAAAAAT	800	TCCCCCACA	518
				GACTAA	6687	ACCACAT	3666	CCCCTTTC	800	CGCACCGCC	518
				GAACTC	6680	AACAACC	3664	ATGCCCCC	798	CCCCTCTAC	518
				GCATAA	6680	AAACACC	3662	GCCACCCT	798	CAGCCCCAC	518
				ACCAGT	6680	CTCACAA	3657	TACCGCCC	798	CCCTCCCTA	518
				AACTGA	6679	CCTTACA	3654	CTGACCCC	798	GCAACCCCC	518
				TTCGCC	6679	CGCCCGT	3650	CTAAAAAA	797	GCGCTCCCC	517
				GCGCGC	6679	CTACTAC	3650	CAGCCCTC	797	CCAGCGCCC	517
				CAGGCA	6679	CAACATC	3647	CTCCGCAC	797	CCCCCTTCA	517
				ACTAGA	6675	CGTCCCG	3643	GACCCCCA	797	CGCCCCGTC	517
				TAATCA	6674	CTGACCA	3639	CTCCCTAC	797	CCCGCGCAC	517
				CGCCGT	6668	TCCCGCG	3639	AGCCCCGC	796	CCCCCTTAC	516
				CAGCTA	6667	ACCGACA	3639	CCTGCCCT	796	CCCACGCCA	516
				GCTCAA	6664	CTCGTCC	3637	ATAAACTA	796	CCGCGCCCT	516
				CATTGC	6663	CACACGA	3630	GACCCCGC	795	ACCCAACCC	516
				TAGACC	6662	ACCATAC	3628	GCGCCCCA	795	ACCCCACTC	515
				GCACTT	6662	CACATCA	3626	CACACTCC	795	TACCCCGCC	515
				CAGACG	6657	GCCTTCC	3624	AAAATTAT	794	CCCCGACCA	515
				CCGAGA	6657	ACTCACA	3618	CACCTCCT	794	ACCCTCCAC	515
				ATTAAC	6652	ACATCAC	3617	CCGGCCAC	794	TGCCTCCCC	515
				CCTAGT	6650	ATCACAC	3610	AATGATAA	793	CCCTCCTAC	515
				AAATAT	6642	CCCAAAA	3609	ACACACTC	793	CCCGCACCG	515
				TCTCGC	6641	CCTACTA	3603	TCCCCAGC	793	CGCACACCC	514
				ATAGCC	6638	GACCACA	3589	CCTAGCCC	792	TGCCCCTCC	514
				CAGACT	6637	TCCAGCC	3585	TAACAATA	792	CCCCTCCGA	514
				AAACTG	6633	GCTCCCG	3579	CAAAAAAC	792	AACCCCCCA	514
				ATTCAA	6633	AACACTC	3576	GCGCCCGC	792	CCACGCCCA	514
				CCGCGT	6627	ACATACC	3572	ACACAACA	792	AGCCTCCCC	514
				CATCTG	6624	GACACCA	3569	GCCACCGC	792	CCCACCCAT	514
				CTCTGA	6621	TCCCTCG	3568	ACACAATA	791	CCCCCGGGG	513
				GTCTCC	6618	CCTACAT	3567	CCCGACCT	791	CGCCCCTCA	513
				GCAGCA	6617	CACTTAC	3566	CACCTCGC	791	AGGCCCCGC	513
				TTCACG	6615	CTCAAAC	3566	TCGCGCCC	791	CCCGTGCCC	513
				TTTACA	6614	CACTACT	3549	AACAAAAC	791	CGACCACCC	513
				TAATAC	6611	CTTACCA	3549	ATAATTAA	790	CCCCTAACC	513
				CTCGCT	6608	CCCAATA	3548	CCCCACGG	790	CCCACTGCC	513
				ACAAGT	6607	CATCAAC	3547	AATTAAAC	790	CCACACCGC	513
				TACTGC	6603	CGACAAC	3543	GCATCCCC	790	CACCCCTCA	513
				AATTAC	6602	ACACCTT	3543	TATACAAA	790	CCGCGCCTC	512
				GACCTT	6601	CATAACC	3540	AATAACAT	790	ACCCTCGCC	512
				TACTTC	6599	ATACCCA	3539	CCCCGCGA	789	CCCCCGCGT	512
				CTAAAG	6599	CTTCACA	3535	AATATAAC	789	CCCCCCTAT	512
				ATTAAA	6596	TACCCTA	3534	ATTACAAA	789	CCCCAACGC	512
				AAAAGA	6594	CCTGACA	3527	GCTCTCCC	789	GGGTCCCCC	512
				GCACTG	6593	CACTCAA	3525	CCCACGTC	789	CACCACGCC	511
				ACCTGG	6591	CTACATC	3524	CCAGCCCT	789	ACCGCCTCC	511
				TTCACT	6591	TACCCAA	3524	TCCTCACC	789	CCCACCCGT	511
				AATCCG	6590	AACTACC	3519	GCTCCCGC	789	CCACGCGCC	511
				CTTATA	6587	CTGCACA	3517	TCGCCCCT	789	CCCCCGACG	511
				GCCGCT	6587	GCCCTCG	3515	ACCCAACA	789	CCCACACGC	511
				ACGTAC	6586	CCTATAC	3511	CCAAACAC	789	CCCACCAGC	511
				ATAAAT	6582	TACACCA	3511	ACCCCAAA	788	GCTCCCCCT	511
				GCCCGT	6582	CTCTACA	3508	TAACAAAT	787	CCCCCAACG	511
				CGTCAA	6579	CACACAG	3505	ACCCTCAA	786	ACTCCCCCA	511
				GCCAAG	6578	ACACCAT	3504	TCGCCCGC	786	CCCTCCCAA	510
				CCGGTC	6578	CCCTATA	3504	GCGCGCCC	786	CCCCAACCG	510
				CAAGTC	6577	CCAAACT	3501	ATATAAAC	786	ACCCCTACC	510
				GATCAC	6575	CCAACTT	3495	CACGCCCA	785	CACGCCCGC	510
				AAAAGC	6573	ACTCAAC	3490	TATAAAAC	785	CCCCCAAAC	509
				TCTACT	6569	CGCTCCG	3488	TCAAAATA	785	GCCGCTCCC	509
				GTACAA	6569	CCAGACA	3486	GCACCCCG	784	TCCGCCCAC	509
				ATGACA	6563	ACACGAC	3484	CCCCAACG	784	CCCCCGGCT	509
				TTACTA	6562	CCGCTCT	3473	ACACCAAA	784	CCCACCGGG	509
				CGTCGC	6560	CTCACTA	3466	GACCTCCC	784	TCCCGCGCC	509
				GAACGC	6555	CCGACAA	3464	CCCCGCAT	783	CCCCCCATG	509
				TCAAGC	6554	ATGACCC	3463	CCCTGACC	783	TGCACCCCC	509
				GTAACA	6554	TCCGTCC	3457	GCCTCCTC	783	ACCCCCATC	509
				TACAAG	6553	TCACACA	3455	CCACAAAC	783	CCCAACGCC	509
				TAGCCA	6552	CACCATT	3453	AAAAAGAT	782	CCTGCCACC	509
				GGGCCA	6550	CAGACCA	3453	CCCGCCAT	782	CCCGTCCGC	509
				GCGCCT	6548	GTCCACC	3452	ACCCGTCC	782	GCCCCGCGG	508
				CTTCAT	6545	ACTGCAC	3444	CTTCTCCC	782	ACGCCCCTC	508
				AACTCG	6544	CAACCAT	3444	CCGTCCAC	782	CCGCGCACC	508
				ATGCAC	6539	CATTACC	3442	ACACCCTT	781	ACCCTGCCC	508
				TAAGCC	6537	CACTCTA	3435	TAAAACAT	781	CCGCCCTCA	508
				TCCAGA	6535	ACTAACC	3434	CCGAACCC	781	CCCCTCGCA	508
				AACAGT	6535	ATAACCC	3430	GCCCGCGC	781	ACCCACCCT	508
				AACGCT	6527	CTATACC	3429	ACCCAGCC	780	CACCCCACG	508
				TCTAAA	6527	CCACTTA	3424	CAATCCCC	780	ACCCCGCAC	507
				ACGCAT	6524	TACCAAC	3422	CCCCGTAC	780	GGGCCCCGG	507
				CGAGCA	6523	CAAACCA	3421	GCTCCACC	779	GGCCCCGAC	507
				ACTCTG	6522	ACTACCT	3416	CACCCCAG	779	GCCGCCGGC	507
				CATGAA	6520	CCTTTCC	3412	TCCACACC	779	ACACCCCCG	506
				TGACCT	6520	AACTCAC	3412	TCACCCAA	779	GTCCCCCCT	506
				TAAACC	6520	CAGCACA	3411	TTAACAAA	779	CCCCACATC	506
				CTGCTC	6519	CAGGGCC	3410	TAAACATA	778	AGGCCCCCG	506
				TAAATA	6516	GGGCCAC	3400	CACCCCTG	778	ACCCTCCCG	506
				ATCGCA	6514	CAATACC	3399	ACATAAAT	778	CACCACCGC	506
				GCCAAT	6513	TTACACC	3395	CCTGGCCC	778	AACCCCCAC	506
				ATCGAC	6508	ACAACTC	3395	AAACATTA	777	CCCCTCGCG	506
				AATCTC	6504	CTTGACC	3394	CCCTTCGC	777	TCTGCCCCC	506
				CATAGA	6501	CCAATAC	3394	CCCCCTGA	777	CCCCTCTGC	506
				CTTTAA	6500	AAACCAC	3393	TCCTGCCC	776	CCCCTACGC	505
				ACAGTA	6499	CACAGAC	3391	TCAATAAA	776	CCCCCAAGC	505
				CATTCT	6497	CCCATAA	3388	ACATAATA	776	AGCTCCCCC	505
				AAAGAC	6494	AACGACC	3388	ACTAAATA	775	GTACCCCCC	504
				TGACCG	6491	ACTTACC	3386	ATATAACA	775	ACCCACCTC	504
				TACTCT	6483	AACCTAC	3384	CCGCCGAC	775	ACCCGCCCG	504
				TTAAAA	6482	TTCACAC	3377	TATAACAA	775	GCCTCCTCC	504
				ATCAGC	6476	CCTAACT	3374	GGCCCCTC	774	CGCCCCCAT	503
				ACAGGG	6473	AAACCCA	3372	ACCTACAC	774	GCCTTCCCC	503
				CTTCGA	6473	ACACTCA	3369	CCCACTGC	774	ACCCTCACC	503
				AACGCG	6471	CCGAACA	3366	TTACAAAA	773	GGGCCGCCC	503
				CGAACG	6468	CTACACG	3365	CCACACTA	772	CTCCCGGCC	503
				CAGCTC	6468	CATCCAA	3364	ACTAATAA	772	CCTCCCACA	503
				AATTCA	6468	CTTAACC	3363	CCACCGGC	772	TCGCCCCCG	503
				GCCAGA	6462	ACCTCAA	3362	AATCAATA	771	CCTCACCCA	503
				GGAACC	6462	TCGCTCC	3361	CCCTCTCA	771	CCCCCTTGC	502
				ATCCAG	6457	CACCTAT	3359	TCCCGACC	770	CCGACCACC	502
				TCCTTA	6455	ACCTTAC	3359	CGCCTCAC	770	AGGCGCCCC	502
				ACAGGA	6454	CTAGACC	3358	ACATTAAA	770	CCCACCTGC	502
				CTCATT	6450	CCACATT	3357	AACACAAA	768	CCCAGCCCA	502
				CAGTCA	6448	AACCACT	3356	TCCCCCAG	768	CCCCAGCCA	502
				GAGCCA	6443	CCACTAA	3355	ATCTCCCC	767	CCCACTCCA	502
				AGTCCA	6442	ATCCACA	3352	AATAAATC	767	GCCCTTCCC	502
				TGAACA	6440	ACAACCT	3351	AATCTAAA	767	CCCCTCCAA	501
				CGGCGC	6439	CTCACAT	3347	TCTCCCCG	767	CCACCTCCA	501
				AGCCAT	6437	ACTTCAC	3346	AATTACAA	766	TCCGACCCC	501
				CACGTT	6435	CCCTAAA	3346	CCAACACA	766	CCCCGCACT	501
				TATCAA	6429	CACAGCA	3344	AATGTAAA	766	CACCACCAC	501
				ACTGAA	6426	ACGCACA	3344	CGCCACTC	766	CCCGCACCT	501
				ACCGGG	6424	GTCCCAC	3344	CCCTGCCA	766	ACCCCCCTT	501
				TAAACG	6421	CATGACC	3343	TATGAAAA	765	CCACGCCAC	500
				TTGACC	6420	CTTCAAC	3342	AAACAACA	764	CCCCCACTT	500
				TCGCCG	6417	GACCCTA	3338	GCCCCTTC	764	AACGCCCCC	500
				AACGGC	6415	CAATCAC	3337	CCCTCCAG	764	CCCACACCG	500
				ATCCTT	6411	ACACAGC	3334	CCCAACCG	764	CACCCACCG	500
				CATTTC	6409	CGCACAA	3332	GCCCAACC	763	CCTCCCCTA	500
				CTGACG	6406	AACTCCA	3329	ATTAAACA	762	CGCCGACCC	500
				TATAAA	6405	CTCTAAC	3328	AATGAAAT	762	CCCCGCCTA	500
				CTTATC	6402	CTAACCT	3328	CCCCATCT	762	CCCCCGCAA	500
				TCAGAC	6399	CGACCAA	3327	TCCTCCGC	761	AGGCCACCC	500
				ACTATT	6397	CATGCAC	3326	CCATCTCC	761	TCCCCCGGG	500
				TATAAC	6393	TACACCT	3318	CAAAAAAT	761	CTCCCCCGA	500
				CTCTAT	6392	GACCAAC	3318	AACCCCAA	760	ATCCCCGCC	500
				TTCTCA	6389	TCAACAC	3317	ATAACAAT	760	CCCCTGCAC	499
				CCAGGT	6389	ATCACCA	3315	TCCCGCGC	760	AACCCACCC	499
				AGACGC	6389	GACACCT	3314	CGCCCCAA	760	CACCCCAGC	499
				CAAGCT	6388	CAACGAC	3313	CATCCCCT	759	ACCTCCCCG	499
				CCTGGA	6388	CAACACG	3312	GCCCGCTC	759	ACGCCTCCC	499
				TATCCT	6383	CGACCTA	3311	TCCCCGTC	758	CCCTCACCA	499
				TGACAA	6382	CAGGCCA	3310	GCCTACCC	758	CACTCCCAC	498
				ATCAAT	6379	CAAACCT	3309	TACAAATA	758	CCTACCCGC	498
				AAGCCT	6378	CCATTAC	3306	ACACAACC	758	CCACCCCTG	498
				CTATAT	6375	CATGCCA	3305	CCTGCCGC	758	ACCACCCTC	498
				GAACTA	6375	CCACAGA	3305	TCCCCTCT	758	CCCCTCAGC	498
				ATACTT	6374	CACACTG	3305	ACACCTAC	758	GGCCCCGGG	498
				GCTTAC	6373	GCACACA	3304	GCCCCTCA	757	ACTCACCCC	498
				AAGCAA	6371	GTCCCCA	3303	CCTCCACG	757	CCCCTCAAC	498
				CTATGA	6371	CAACCTT	3300	ATAAAAAG	757	CCCCAGCGC	497
				CAGGGC	6370	ACTACTC	3299	GCCTCCCA	757	CCCTACCAC	497
				ACATGT	6358	GACCCAA	3295	CCCCTGTC	757	ACCCCCGCT	497
				TCTTCA	6356	AGCACAC	3294	TAGCCCCC	756	CGGGCCCGC	497
				TGCCTA	6353	ATTACCC	3293	ATATACAA	756	CCCCGCCAA	497
				TCTTAC	6350	ATGCCAC	3289	ACATCCAC	756	CCCAGCCAC	497
				CGAAAA	6348	CATCCTA	3289	GGCCGCCC	756	CACCCCTGC	497
				TTCAAA	6343	TTGACCC	3287	CCCCATGC	756	TCCCCGCGC	496
				CGGACA	6341	CACAATC	3286	ATACAAAT	756	CAGCCACCC	496
				AATAAT	6340	CCTCATA	3286	ACCCGCCG	755	ACCACGCCC	496
				AGCTAC	6339	ACAAACC	3283	CTTCCCGC	755	CCGCCCTCG	496
				CAGTAC	6337	ACCACTT	3282	CGCCCCTA	755	CCCCCTACG	496
				AATACG	6336	CACGACT	3282	ACACACCT	755	CCGCCACCT	496
				CGTCCG	6336	ACAGACC	3281	ACAAATAT	755	CGACACCCC	496
				AGACTC	6336	ACCACGA	3280	CCCCCATG	754	ACACGCCCC	495
				ATAATC	6335	ACAGCAC	3278	AAACTAAT	754	AACCCCGCC	495
				CAATAG	6330	CCTTTAC	3276	TCGCCACC	754	ACCACCCGC	495
				CTATCG	6329	CCATACT	3276	CCCAGCCA	753	CCCGACCTC	495
				CATAAG	6318	CCGGCTC	3274	AACAACAA	753	GCCCTCTCC	495
				ACTAAG	6315	CACTGAC	3273	TACCCTCC	753	CCCCTCCAG	495
				AAAAAG	6314	CCACAAT	3271	ATTCAAAA	753	CCCGCCTCA	495
				TTATCC	6311	CCAACAG	3271	GAACCCCC	752	CCCTGCCGC	495
				AGTACC	6308	ACACTTC	3267	ACCACACA	752	CGCCTCCGC	494
				GGCCTA	6306	CAACAGC	3263	AACTAATA	752	CCACCCAAC	494
				CAGGAC	6306	CCCATTA	3261	CTCACCCT	752	CACGCCCCG	494
				ACGCGA	6298	AACCCAT	3261	CCCTCCGT	751	AGGCCCCAC	494
				AACTTT	6297	ACGACCT	3261	CCAACCAA	751	CCACACCCT	494
				CAGAAA	6297	AATACCC	3260	CCCCCAAG	751	GCTCCCCTC	494
				AGGCCA	6291	CACGAAC	3260	CAACACAC	751	CCCTACCCT	494
				CTAGAA	6291	CTTTACC	3259	CGACTCCC	751	CCCCACGCT	494
				CCTTTG	6289	CCAACGA	3258	CCTCGCGC	750	TCGCCCCCA	493
				CCTTTT	6288	CCTACTT	3257	ATTAACAA	750	CAGCCCACC	493
				CCGTCT	6285	CCGACTA	3257	AGCACCCC	750	TCGCCGCCC	493
				TCTCTA	6285	TTACCAC	3256	CCACCAAA	750	CACCCTGCC	493
				CGGTCC	6277	CGCAACA	3256	AAATTACA	750	CACGCCACC	493
				CAAGTA	6276	CACGCTA	3255	CTGCACCC	749	CGGCTCCCC	493
				CGTAAC	6270	CGTCCTC	3254	GCCCCCGG	748	CCCCGACCG	493
				TACCGT	6269	ATGCCCA	3252	CCCTTCCT	748	CCCACCACG	492
				TTCTAC	6267	CTATCAC	3252	AGACAAAA	748	ACCCCGCCG	492
				TACTTA	6266	CTCAACT	3251	TTAAAACA	748	ACACCCCTC	492
				TCGCGC	6263	ACTGACC	3250	AAATACTA	748	CAACCCCCA	492
				CATGGC	6258	GGGCCCA	3247	CACCGCCA	748	CGACGCCCC	492
				GGACAA	6255	ACATCCA	3246	CACCGACC	748	CCACCAGCC	492
				CGACTG	6251	ACCCTAA	3246	CACTTCCC	747	CCTCCCCAG	492
				TCTACG	6250	CCCTTAA	3245	CCAGGCCC	747	CCCCTCTCA	492
				CGACTT	6244	ACACACG	3243	TAACTAAA	747	CCGCCCACT	492
				CTAGCG	6243	ACCCTTA	3242	ACCCGGCC	747	TCGCACCCC	492
				CGCAGA	6243	CAACTCA	3241	CCACAACA	747	CGACCGCCC	491
				AATATC	6236	CTGACCT	3238	CTCCCATC	747	ACTCCCCCG	491
				GGATAA	6234	ACAGCCA	3238	CCGCCACT	746	CTACCCCCA	491
				GCCTTC	6230	CTCGACA	3237	AAAATAAG	746	CCCAACCGC	491
				CATATT	6228	GCTCTCC	3235	AGTAAATA	746	CCCCGTGCC	491
				AAATCT	6227	TAACCAC	3234	AAGAAAAT	746	GCCCCGTCC	491
				ACAGAT	6223	CAGCCTA	3234	AAACCCAC	746	CACCCCCTG	491
				AACTAG	6222	TCACAAC	3233	AATTAACA	746	CGCCACCCT	490
				TCCTGA	6222	TCTACAC	3231	ACGCCGCC	745	CCTCCCGCA	490
				AACGTA	6221	CTACCAT	3229	ACAACAAC	745	TCCCCTGCC	490
				CTAATT	6219	AGACCAC	3226	CCTCTTCC	745	CCAACCCCA	490
				AGCACG	6218	AACCCTT	3225	CCCACGCA	745	CCCCTGCCA	490
				AACGTC	6214	AGACACC	3222	ATAATAAC	744	CAGCGCCCC	490
				ACAGCT	6214	CACTTCA	3218	CCCGGCAC	744	CGCACGCCC	490
				ACTTAT	6213	CTGCAAC	3218	CTGCCCCA	744	ACCCCATCC	490
				CCGAAT	6210	CGGCCCG	3218	TAATAACA	744	CCGCCGCAC	490
				GACTTC	6205	ACACCGA	3218	AAAACATT	743	CACCGCCCA	489
				CTTCAG	6204	CCGACAT	3217	TGCCCCGC	743	AGGCACCCC	489
				GCAAGC	6203	ACCATCA	3216	ATTAAATT	743	CCCACGACC	489
				AATCAT	6200	TAACCCA	3215	TTGCCCCC	743	CGGGCACCC	489
				TCACGG	6200	AACACGC	3214	AAATCATA	743	CCCCAAGCC	488
				AAAATT	6192	CCATCAA	3213	CAACAAAA	742	GTCCCCCTC	488
				AGCAAA	6190	CTTGCAC	3213	AATAACTA	742	CGCCCCACT	488
				CCTGAG	6189	TACCTAC	3209	ACCACAAC	741	CCCCTTGCC	488
				AAACGT	6189	CCATCTA	3208	AGCCTCCC	741	ACCCTCCGC	488
				CAGCAT	6189	CAGGCAC	3208	ATTGAAAA	741	GCCTCTCCC	487
				AAATTC	6187	CTGTACC	3208	CAGCACCC	741	GTCCACCCC	487
				CGAGAC	6187	CTTACCT	3206	ACCCACAT	741	CGGCCCGGC	487
				CTGACT	6186	CAAGACC	3206	TAAGAATA	740	TCACCCCGC	487
				GCAGAC	6183	GGGCACC	3201	CAGCCCCA	740	CTGCCACCC	487
				ATTTCC	6183	ACCTGAC	3199	AAACTATA	740	CCCCCGCTA	487
				GAGACC	6181	CAGACCT	3198	TTTATAAA	740	CCGGCCCCT	487
				GTTACC	6181	ACCTACT	3197	CGGCCCAC	739	CCCCCTACT	487
				TACCGG	6180	CATTCAC	3195	AATACAAT	739	CCCGCCTTC	487
				CATGCG	6177	CCTCAAA	3195	GCCGACCC	739	CCCTACCGC	486
				GCCTTA	6175	CAAGCAC	3194	CACACCCG	739	CCCCCATCG	486
				CTCAGG	6171	CTACGAC	3193	CCCTGCTC	739	CCACCCACG	486
				TTTCAC	6170	CATACTC	3191	CCGCCATC	738	CCTGCACCC	486
				CTTAGC	6165	TACGCAC	3189	TAACATAA	737	TCCGCCCCA	486
				ACGATC	6158	CATCTAC	3187	CGCCACCA	737	TCCGCGCCC	486
				GCAATC	6156	GCGACAC	3186	TAAAAATC	737	CCACCACCG	486
				CGCGCT	6154	CATACCT	3185	ACATATAA	737	CCCCCGACT	486
				ACTTGA	6153	ATACCCT	3183	ACTCCAAC	737	CCACCCGGG	486
				TCCGAA	6150	CACTATC	3183	CACTCCCT	737	ACCACCCCT	486
				ATCCTG	6150	CCTGAAC	3182	TTTAAAAT	737	CCCACCAAC	486
				ACTTCG	6143	CAAACTC	3182	GCCCGACC	737	CTGCCCTCC	485
				TCATGC	6138	CACCAAT	3178	CCACGTCC	737	GGGCCACCC	485
				ACCGTT	6136	CTGGCCA	3177	TTAAACAA	736	CGCTCCGCC	485
				TGCACG	6132	CTCCATA	3176	TATAAACA	736	CCACCCGTC	485
				GTACCT	6131	GCCACAA	3174	AAAACACA	736	ACGTCCCCC	485
				CATTAT	6130	CCCTTTA	3173	ACAGAAAA	736	AGGCCGCCC	485
				GATAAC	6126	CTCATAC	3173	CCTGCACC	735	CCACCGCGC	485
				GAATCC	6126	ACCCAAT	3171	AGGAAAAA	735	CCCCACCAG	485
				TCCTAT	6119	CTACTCA	3170	ACCGGCCC	735	CCGCACTCC	485
				GTACCG	6116	GCACAAC	3170	GCGCCCCT	734	ACCAACCCC	485
				CGCAAT	6115	AGCCACA	3169	AGATAATA	734	CCAGCCACC	485
				AATCGC	6114	CAGGACC	3167	CTTCCCCT	734	CCCAGCCGC	485
				GTCGCC	6113	TGACCCA	3166	GCTGCCCC	734	CGCCCGCAC	485
				TCACGT	6110	CCTAGAC	3162	AATTGAAA	734	GCATCCCCC	484
				TAGACA	6108	ACACGCA	3162	ATACATAA	734	CGCCACCTC	484
				CGAATC	6106	ACCACAG	3161	CGACCCGC	734	CCTCACACC	484
				GCCTGA	6105	TCCAACA	3160	ATAAATGA	734	CCCTCAGCC	484
				ACAAGG	6104	CCATGAC	3158	ATATGAAA	734	TCCCCCCTG	484
				TTAAAC	6102	TACTCAC	3158	CCCGCCGA	733	ATCCCCCCA	484
				CGCAAG	6099	ACGCAAC	3156	AATTCAAA	733	TCCCCCCAG	484
				TGACGC	6098	ATCCAAC	3154	AAATTAAC	733	CCGGGCGCC	484
				TATTCC	6097	TTACCCA	3153	AGAACAAA	732	CCCGTCACC	484
				CCTGAT	6088	TCGTCCC	3149	AATTTAAT	732	CCCACACCT	483
				AGATAA	6087	ACCAACT	3149	AAATCTAA	731	CCCCACTTC	483
				CAATTT	6081	TGCACAC	3148	TCCCCTGC	731	GCCATCCCC	483
				TCCGCT	6078	CTACCTT	3147	TCAAATAA	731	CCCAGCACC	483
				ACATTG	6076	AACGCAC	3145	GACCCACC	731	CGCCCAACC	482
				CTGTCA	6075	CGAACAC	3145	AAAAACGA	731	ACCGTCCCC	482
				TAACTT	6075	CCGTACA	3145	CCCTGCGC	730	CCCTGCCCG	482
				CATTCG	6074	CTGGCAC	3144	CGACGCCC	730	GTCTCCCCC	482
				GCTACT	6067	CAATCCA	3144	TAATGAAA	730	CTCCCCACA	482
				GACTGC	6065	TACTACC	3144	TATTAATA	729	TCTCCCCCA	482
				CCGAAG	6065	ACCTCTA	3143	AATAATAC	729	CCGCCCCAT	482
				TATGCC	6061	GGCACAC	3141	CCCAACAA	729	AACCCCCGC	481
				GCTACG	6058	CGGCTCC	3140	AAATGATA	729	TCCCGCCGC	481
				GGGCAC	6055	GACCACT	3139	ACAATATA	728	AACCCCACC	481
				CTAATG	6054	CACGCAA	3139	CATTCCCC	728	CCCTCCAGC	481
				AATGCA	6045	CCTACAG	3138	ATTAAAAC	728	CCCCGCTAC	481
				AGACAT	6045	CGTACAC	3136	AGCCCACC	728	CCACGCCCG	481
				TGTACC	6039	CCTTGAC	3136	TATTAAAT	728	CCGGCCTCC	480
				CTCTAG	6036	CACAACG	3135	CCTCATCC	728	CTCCCCCTA	480
				TTCCGA	6036	AAGCCAC	3133	CACCCAGC	727	CCGGGCCGC	480
				GTCCAC	6034	CTAAACC	3133	CGCCCAAC	727	CCCCCTCAG	480
				AGTACA	6032	TTTACCC	3133	CCAGTCCC	727	CCCACTACC	480
				GCCGAA	6030	CCTTCAA	3132	AAAGTATA	727	AGGCCCGCC	480
				CTGCTA	6023	TCACCTA	3132	AAAGACAA	727	CCCCCTGCT	480
				GTCCCA	6022	CCAGGGC	3131	ACAACACA	727	CCGCTCCGC	480
				TACATG	6021	ACTCCAA	3128	ACTCCCAA	727	CCCGCCCGT	480
				GCCATG	6021	CCCAAAT	3126	TTAATATA	726	ACCTTCCCC	480
				CTAGTC	6020	TGACCAC	3125	AACCACAC	726	CCACCGCCA	480
				TCTGCA	6019	GGCCACA	3125	CCTCGCCT	726	CACCACCCG	480
				AGACTA	6018	CTCCAAA	3124	AGCCCCCT	726	ACCTCCGCC	479
				TACATT	6016	CTGGACC	3124	ATCAAATA	726	CCCGCCATC	479
				ACTTTC	6013	CGCTACA	3124	TCAAAAAT	726	CCCACCACT	479
				GCGTCC	6009	CCTATCA	3120	CAACCGCC	725	GCGCCCGCG	479
				AGGACC	6006	CACCTTT	3119	TCCCGCCT	725	TACCGCCCC	479
				AGTCAC	6005	GTCCGCC	3119	CTCACCGC	725	CTGCACCCC	479
				AGCGCA	6004	TTCACCA	3115	GCCCTCCT	725	CCCAACCCT	479
				TTAACT	6003	AAGACCC	3115	CACACAAC	725	CACCGCGCC	478
				GCAATA	5997	ACGCCTA	3111	AAATATAC	725	GCCACCCGG	478
				TCATTC	5996	CAGCAAC	3111	CAAACAAA	725	CCCACCATC	478
				AGATCC	5995	CGCTCTC	3111	CTTAAAAA	725	GCCACTCCC	478
				AGCCGA	5993	AACCTCA	3109	CCAGCCGC	725	GCGCCGGCC	478
				ATTGCC	5991	CTGCCTA	3108	GAACAAAA	724	CCACCCGCT	478
				GCATGC	5990	AACATCC	3108	CCACACAT	724	CACACCCCG	478
				TTGCCA	5986	CCTACGA	3107	CCCAATCC	724	CCCCCGCAT	478
				ACCGTG	5984	CTACCGA	3106	ACAATAAT	724	ACTCCCCGC	478
				CGTCTC	5981	GCACCTA	3105	ATGAAATA	723	CCCCCCGAT	478
				TCAAAT	5980	ATGCACC	3104	TACATAAA	723	CCCTCGACC	478
				GGCAAC	5978	ATCCCAA	3102	AAATTTTA	723	CGCCCCATC	478
				GCTTCA	5972	ACAACGC	3100	ACTCTCAC	722	CCAGCACCC	478
				GCTGCA	5972	CACACGT	3099	CGCCCACA	722	TTCCCCCCC	478
				GTCAAC	5969	ACCGAAC	3098	CACCCACG	722	CCTGCCCCT	477
				ACGGAC	5967	CACGTAC	3098	AATATACA	722	TCCCCCCAA	477
				TGCAAC	5967	CCACAGG	3097	CAACCCCG	722	CTACCCGCC	477
				CGCTTA	5967	CAACGCA	3096	CCACCGCT	722	CCCCAACCT	477
				AAATGA	5964	CCAATCA	3095	TCTAAAAA	721	CCCAGGCCC	477
				ATTACT	5963	CCAAGAC	3095	CTATCCCC	721	CCACGCACC	476
				ATAGCA	5961	ACGCCAA	3094	CTCAACCC	721	CCCACGCGC	476
				CTGTAC	5961	TAACACC	3094	ATGTAAAA	721	CGGGTCCCC	476
				GGTACC	5960	ACCCATT	3093	AAACTTAA	721	CCACCAACC	476
				CCAGTG	5956	GACCTAC	3092	AATCAAAT	720	CCCTGCCAC	476
				TCCATT	5954	AACCATC	3088	ATAAAATC	720	TACCCCCAC	476
				CGGCCT	5954	CTAACTC	3087	CATCCCGC	720	CGACCCTCC	476
				ATAAGC	5953	CGACACT	3086	AAAAATAG	720	CCCCTGCCG	476
				CACGGT	5951	GTGACCC	3086	AACTTAAA	720	CCGGCCCTC	476
				AGGCAC	5948	GCAACAC	3086	TATCAAAA	720	CCCGACTCC	476
				GGACCT	5947	AACGCCA	3085	ACAACCTC	719	ACCTCCACC	476
				TGCACT	5944	CACAGGC	3084	TCATAAAA	719	CACCCACGC	476
				CCGGGA	5942	TACGACC	3080	TAATACAA	719	TACGCCCCC	475
				GCGCTC	5942	CCGGACA	3079	ATAAATAC	719	CCCTGGCCC	475
				CAGCGA	5940	AATCCAC	3079	TGCCACCC	719	CTCGCCGCC	475
				TACTCG	5937	TATACCC	3079	ACCACCAA	719	CGCCCTCGC	475
				TCGCCT	5936	GCCAACA	3077	GCCCCAGC	719	ATCCCACCC	475
				TCCATG	5933	CACTGCA	3075	GCCCCACG	719	CTTCCCGCC	475
				TAGCAC	5932	CAACCGA	3074	CCCCCGAA	718	TCCCGCCCA	475
				GCTAAA	5932	ACCTATC	3073	GTCCCCTC	718	GGCGCCCCG	475
				CTTAAT	5932	CCCAATT	3072	AAATACAT	718	TCGCCACCC	475
				ATCTCT	5929	CACAAGC	3069	TGCACCCC	717	CCGCAGCCC	474
				GACCGG	5928	CTGAACC	3068	CTCCCCGA	717	CAGCACCCC	474
				ATTCCG	5925	TACAACC	3066	CCCTCCTG	717	GTTCCCCCC	474
				AAGCCG	5923	CGCACTA	3065	GCTCGCCC	716	CACGACCCC	474
				GACCGT	5920	TCGACAC	3061	AAACGAAA	716	CCTGCCCTC	474
				GAAAAA	5918	AACACAA	3060	ATGAAAAT	716	ACCCAGCCC	474
				TCATCT	5917	AGGCCAC	3060	AAACAAGA	715	TACCCCCCG	474
				CCTTTC	5915	CGCCTCG	3059	AAACAATT	715	CCCCAACTC	474
				CATATG	5914	CTACAGC	3057	AACTAAAT	714	CCTACCCAC	474
				ACTATG	5909	CCCAGGG	3056	CACCACCG	714	CCCCTCACG	474
				CGGCCG	5906	CCATATC	3056	ATTTAATA	714	CAACCCGCC	474
				CAAAGT	5906	CATCACT	3053	ACCCAAAA	713	CCACACCCG	474
				GAACAT	5896	CCTTACT	3049	ACAAACCC	713	CCCCATACC	474
				CTGAAA	5896	CTAGCAC	3049	AATATCAA	713	CCCCATCAC	474
				GACAAT	5893	CCGACTT	3048	GCCCGGCC	713	CCCCCTAGC	473
				TACGCG	5891	AACACCG	3045	CCCTCAGC	712	CCTGACCCC	473
				TACTAT	5891	AACAGCC	3043	CCCCGATC	712	CCCCCGTCA	473
				AAATGC	5890	TACACTC	3041	TCCCCCGG	712	CTACCCCGC	473
				ACCGGT	5885	AGCACCA	3041	ACACATAA	712	CCCCGCAAC	473
				ATCTGC	5883	ACCAATC	3040	ACAACATA	712	ACACCCTCC	473
				TTACAT	5882	CCTTCTA	3038	AAAGAAAC	712	CACCCGCCA	473
				ACGCTT	5881	CACCAGA	3036	ATATCAAA	711	CGCCCACTC	472
				TACGGC	5881	TAGACCC	3035	TAAAATGA	711	CACCCCCAT	472
				GGACCG	5881	ATCCCTA	3035	TGCCTCCC	711	CCCCCAGTC	472
				TATCCG	5875	TCCTACA	3029	ATTTATAA	711	GCGCCCGAC	472
				CGAATA	5872	CGGACAC	3028	CAAAACAA	711	ACTACCCCC	472
				CGAAGC	5871	CTCACTT	3027	CTTGCCCC	710	CACCTCCCA	472
				CATGTC	5870	AGGACCC	3024	CATCCACC	710	ACTCCACCC	472
				CAAGAT	5868	CTATCCA	3022	TAAAACTA	710	CACTCCCCA	472
				CAGCAG	5868	CAACTTC	3022	ATGAATAA	709	CTGCGCCCC	472
				AAAATG	5862	ACCTTCA	3021	ACACCATC	709	GGCCCGCGC	472
				TGACTC	5860	AATCCCA	3020	TAAACAAT	709	CCCCCCATT	472
				CCGTTA	5859	ACACCTG	3020	CACCGCTC	709	ACAACCCCC	472
				ACTGGC	5855	AGGGCCC	3020	AGCCGCCC	709	TCCCCCTGC	472
				GCCTAG	5852	GCTACAC	3019	AATACTAA	709	CCGCCCATC	471
				GTGACC	5852	CATTCCA	3018	GCCATCCC	709	GCCCGCGGC	471
				TTATAC	5851	CCCATAT	3014	CACTCCGC	708	CCCTCCTGC	471
				TCCTAG	5849	CCGCATA	3013	ATATATTA	708	CCCTGCCCT	471
				ATGCCT	5847	CTAGCCA	3012	TTTTAAAA	708	CGCCCTCAC	471
				CTAGGA	5842	CTGTCAC	3012	ACAAACAC	708	CACCGCCAC	471
				TCAAGA	5842	CTGACGC	3010	ACACTCCA	708	CGCCTCCCG	471
				AATGAC	5840	CCACATG	3008	TAAATCAA	708	CGCGTCCCC	471
				ACGCAG	5840	CAAGCCA	3006	GCCCCCTG	708	CCACCCACT	471
				TTATAA	5838	CAGCCAA	3006	CCTCCTCT	707	ACCCGCACC	471
				CCTTGT	5837	CACGGAC	3005	TAACACAA	707	ACCCTACCC	471
				ACGTAA	5836	AACCGAC	3005	CCGCCCGG	707	TAGCCCCCC	471
				GCTCTC	5836	ATTCACC	3005	CCGCCTTC	706	TCGCCCGCC	471
				ATCTTC	5835	CCAAACG	3004	CTACCTCC	706	TCACCCCCG	471
				AGCCAG	5835	CTGCCAA	3004	ATACTAAA	706	CCGCCTACC	471
				GCCATT	5834	CATACGC	3004	ACGAAAAA	706	ACATCCCCC	471
				ACGATA	5828	CACTCAT	3000	CACTGCCC	706	CACGCACCC	470
				TAAGCA	5826	GTCCCGC	2999	TACGCCCC	706	CCCCGCGCT	470
				AAGTCC	5826	CCGGGAC	2999	CCGTCCCA	705	CAGCCGCCC	470
				GTATCC	5824	TACCACT	2999	CCGGGCCC	705	TCGACCCCC	470
				TTACAG	5823	ACGACGC	2996	GATAAAAT	705	CCACAACCC	470
				ACTGCG	5822	ATCTACC	2996	AGAAACAA	705	CCACTGCCC	469
				TCAGGC	5822	CTGCACT	2995	TAAACTAA	704	CTTGCCCCC	469
				ATTCTC	5822	AAACCCT	2995	AAATAACT	704	CCAACCCAC	469
				ATACTG	5821	ACTGCCA	2993	CCCCGACT	704	TCCCGCCCG	469
				ATATAT	5817	TGCCACA	2989	ATAAAATG	704	CTGCCCCTC	469
				AGCCTT	5817	CCCTAAT	2988	AAAGAACA	703	AAGCCCCCC	469
				ATATCT	5816	GACGACC	2988	CCCCTTGC	703	AACCACCCC	469
				TATACT	5815	CCGACGA	2987	CCTCTGCC	703	GTCCCCTCC	469
				GACTCT	5813	TACTCCA	2987	GCCCACCG	703	CGACCCCCT	469
				GCCAGG	5806	CTCACGA	2987	CGGCGCCC	703	TCCCCACCA	469
				AAAGAA	5801	ACATGCC	2986	GAAACAAA	703	CCGCCCGTC	469
				GACAGA	5800	CACTACG	2985	CCCGTCCA	702	ACCCACTCC	468
				ATATTA	5800	ACGTCAC	2984	ACTAAAAT	702	CACACACCC	468
				GAATAC	5795	CCAGAAC	2983	CCCACGGC	702	ACCCTCCCT	468
				ACTGTC	5795	CCGATAC	2981	ACAAACTA	702	CCAGCCCTC	468
				CTGGCA	5794	ACTACGC	2980	CTCCTCCA	702	ACCACCCCG	468
				GCGGCC	5791	CGACCAT	2980	CCCTCTTC	702	ACCCGGCCC	468
				AACGAT	5790	CAGGCCT	2978	TTAAAATT	701	CTGCCCCCT	468
				GCACGG	5788	ATCAACC	2975	ATAAATCA	701	TCACCCGCC	467
				TTAGCC	5788	ACCCAGA	2975	ATGATAAA	701	CGCCTCGCC	467
				CTAGGG	5787	CGGACCA	2975	CCACGGCC	701	CCACGACCC	467
				CAAGGA	5786	GACTACC	2975	CCTAACAC	701	CACCCCCGT	467
				TACGAA	5786	ACTTCCA	2974	CCCCAGGC	700	CCTCGCGCC	467
				GGCTAC	5785	GACAACC	2972	GCGCCACC	700	CGCCCTCCA	467
				CGACGT	5784	CACCTGA	2972	TTAATAAT	700	CACCTCCAC	467
				TTATCA	5783	AGGCCCA	2971	AATTATTA	699	CGACCTCCC	467
				GAATAA	5783	TCACCAA	2970	CACGCCTC	699	TCCCCCTAC	467
				GAAGCC	5783	CCAAATC	2969	ATTTTAAA	699	GTCCCACCC	467
				ATTTAC	5782	TTAACCC	2969	CCTCAGCC	699	CCCACAACC	466
				GCCGTC	5781	ATACCTC	2968	ACATAAAC	699	CACCCAACC	466
				TTAACG	5778	ACTCCTA	2968	ATTTAAAT	699	CGCCTCCAC	466
				GCCTAT	5775	CACATCT	2966	AAAGCAAA	698	CCCCCCGTT	466
				ACGGCA	5775	AACCTTC	2963	ACCCACTA	698	CCCCGGACC	466
				CAGATC	5774	ACTCACT	2963	ACTAAAAC	698	CCGTCCGCC	466
				CAGAGC	5774	ACAGGCC	2962	AAGAAAAC	698	CCCTCACCG	466
				ACGAGC	5773	CTACTTC	2962	CCTCCTGC	698	CCTCCCGTC	466
				GCGCAA	5772	CACATGC	2961	CCACGCCG	698	CCGCCGCCT	465
				CAGGCG	5771	CACATTC	2960	AGTAATAA	698	CCTCCCCGT	465
				GCACGT	5763	CCGTAAC	2959	AAAAACAG	697	CCCCCAACT	465
				TTCCAT	5762	ATTCCCA	2959	AACAAACA	697	CCGCCAACC	465
				TCCAGG	5760	ACCCTAT	2957	CCCCTACG	697	CTCCCCTCA	465
				TTCATC	5760	TACGCCA	2957	ACTAACAA	697	CTGACCCCC	465
				ACTGCT	5759	CCTAATC	2956	CCATCCCG	697	TCACCCCAC	465
				TCTATC	5759	GACACTC	2955	GGCCCCGC	697	CCCGTCCCA	464
				ATAGAC	5758	CCTGACT	2955	ATCCCTCC	696	AACCCCCCG	464
				TCATTA	5758	CACACGG	2953	AGAAAACA	696	TCAGCCCCC	464
				CAGATA	5756	CGGGCCA	2948	TAAAATAC	696	CCGCCTCCA	464
				CCTTGG	5753	ATCACCT	2948	TCGGCCCC	696	CCCTTCGCC	464
				AAGAAC	5752	CTCACAG	2948	TCCGCCGC	695	TACCCCACC	464
				CTGCGA	5752	ACCAGAC	2947	CCGACCCG	695	CCCACACTC	464
				AGCGAC	5747	CCAACTG	2947	ATAAACAT	694	CACCCGACC	464
				GCATTC	5745	CAGACTC	2946	CTCCACCA	694	ACCTCCCGC	464
				CCGTGA	5740	AATCACC	2946	CGGCCCTC	694	TCCCCAGCC	464
				GACAAG	5736	CACGCAT	2946	ACAAATTA	694	CCACGGCCC	463
				GAGCAC	5735	CAGTACC	2942	TTATAATA	694	CCCACATCC	463
				AGCATC	5733	CTAACGC	2942	CCTCCGTC	694	CCCCCGTAC	463
				CAATTG	5732	ACGTACC	2941	AAGAACAA	694	CACCCCGCT	463
				ACTGTA	5728	AGACCCA	2941	CACCGCCT	694	CACCCTACC	463
				TCAAAG	5726	TACCCAT	2941	CCTCCCGG	694	CCGCACCTC	463
				AAGGCC	5724	ACTCTAC	2941	AACATATA	693	CCGACCCTC	463
				CATGTA	5724	CGGGCAC	2940	ATCTAAAA	693	CCCACGCCG	463
				TTCCAG	5723	CCAACGT	2940	GGACCCCC	693	GCGCCCGGG	463
				ATCAAG	5720	GGACCAC	2939	TAATCAAA	692	CCTCCCTAC	463
				CTCGTA	5718	AACTGCC	2939	CCGCAACC	692	TCCGCCACC	463
				GACGCG	5718	TACATCC	2938	CTCTCCCA	692	CCACTCCCA	462
				TCGCAA	5717	TAACCCT	2936	GCCCCCAG	692	CCTCACGCC	462
				TAAAAT	5717	CCACTAT	2935	TTTAAATA	692	AGGGCACCC	462
				TCTTAA	5715	ACCACTG	2934	AAGACAAA	692	GCGGCCGCC	462
				TTACGA	5714	GCCACTA	2932	GGCCACCC	691	TGTCCCCCC	462
				GGCCGA	5713	TGGCCAC	2932	ACCCCGCT	691	CACCCAGCC	462
				TACTGA	5711	TTACCCT	2931	CCCTACCG	691	GGCCACGCC	462
				ACAGAG	5707	AAACCTC	2930	TGGCCCCC	690	CCCGCAACC	462
				GTGCCA	5707	CTAGGCC	2929	ATTAGAAA	690	CACCCGCGC	462
				CATTGA	5706	CTGTCCA	2929	CATAAATA	689	CCATCCCCA	462
				ATAAAG	5699	GGCACCA	2929	ACCCTAAC	689	CCACCGCCG	462
				CGACGG	5699	GCCTACA	2928	ATAGATAA	689	ACGGGCCCC	462
				AATCGA	5699	ACGAACC	2927	AATTTTAA	689	CCCCGCCGT	462
				TAACTG	5698	CAGAACC	2927	AAAAAACC	689	CGCCCACCT	462
				CTATAG	5697	ACCGCAA	2927	GCACCGCC	689	GGCCCGCCG	462
				GGCACG	5693	CTGACTC	2927	AAATTGAA	689	ACCACTCCC	461
				AAACGG	5692	GACTCAC	2927	TATATAAT	688	CCCCAAACC	461
				GCTGAC	5689	GCCACAT	2927	CCCATTCC	688	CCCGCCCAT	461
				TGATCC	5683	AACTTCC	2925	AAAATCTA	687	CTCGCCCCA	461
				TATCTA	5679	CTTACTC	2925	TAAGAAAT	687	CACACCTCC	461
				GTACTC	5677	AAAACCC	2925	GTAAAATA	687	CCCTACTCC	461
				TGCTAC	5676	CGGCACA	2923	CCGCCCAG	687	CGGCCCGCG	460
				GGCGCA	5674	CTGCTAC	2923	TGCCCCCA	687	GGGGCCCCG	460
				AAGCGC	5673	CTATGCC	2921	CGCCACGC	687	CTCGACCCC	460
				GCATCT	5670	GTCCCCT	2921	TCCGCCCT	686	ACCCCCTCT	460
				GGCACT	5667	TGACACC	2920	ACTAAACA	685	CCCGCACTC	459
				GGCGAC	5666	CCTACTG	2919	CCGGACCC	685	CCCACCGCT	459
				CGTACT	5665	AGGCACC	2915	TCCCCACG	685	CCTACGCCC	459
				ATCATT	5658	TACCCTT	2915	CCCCTCGG	684	CCACCCCAT	459
				ATCAGA	5657	CGACTAC	2915	CCCCAGTC	684	CACCCACCT	459
				ACATGG	5656	CCACGGG	2914	AAATAATC	684	CCTCGCCCA	459
				TTCAGC	5655	CACGGCA	2914	TCCCTTCC	684	GGCCACCCA	459
				GTACGC	5647	TCAACCA	2914	AAAATTAC	683	CCTCCTGCC	459
				AACTTG	5645	ACGCTAC	2913	AAATAATG	683	ATCCCCCAC	459
				TTGCAC	5644	AACCACG	2913	GCCCCCGT	683	CCACACCTC	459
				ATATTC	5644	CGCTAAC	2912	AAAATATC	683	TCCCCCGCT	458
				CGTGCA	5643	ACAGCCT	2911	CCCAGCCT	683	GCTCTCCCC	458
				ATTACG	5640	CCATGCA	2910	TCAACAAA	683	CACCACCCT	458
				TCTGAC	5640	CCAAGCA	2910	CACCCCGT	683	TCCCCGCCA	458
				CTCAGT	5638	CACGTCA	2907	TCAACCAC	682	CTACCCCAC	458
				CTTCTG	5637	CCCATGA	2906	AATAAATG	682	ATCCCCCGC	458
				CATCGT	5637	TACCGAC	2905	ACAACCAA	682	CCGCCCGCT	458
				TCGGCC	5636	CCGAACT	2904	CCAACCTA	682	CCCCTCCTG	457
				ATAAGA	5634	AAGCCCA	2904	TACAATAA	682	TCCCCCGTC	457
				GGACGC	5633	GTCCCCG	2903	CACCGCGC	682	GCCCCCGTG	457
				TATACG	5632	CCAGCAA	2901	AAATCAAT	682	CTCCCTGCC	457
				GGTCCA	5629	CTACCTG	2899	AATAAACT	682	CCCCTTCCA	457
				ATCTTA	5625	CCATTCA	2898	AAATGAAT	682	ACTCCCACC	457
				ATGCAA	5618	CTCCTAA	2897	TATTTAAA	682	CTCCCCCTG	457
				CGCTGA	5618	TTGCCCA	2897	TAATAATT	681	GCTCCCTCC	457
				ATTTAA	5616	TGCACCA	2896	AATATGAA	681	CCCGGACCC	457
				GACTTA	5615	CCACTGA	2895	TATTATAA	681	CCACCCAGC	457
				CATCGG	5615	GGGCCCT	2894	AAGATATA	680	CCCACCCTT	456
				CGCGAA	5609	CTACGCA	2894	TATAAATT	680	CCCCTCCTA	456
				TCTATA	5608	CAGTCAC	2893	AATCATAA	680	CCCCATCCA	456
				CCTGTG	5608	CAGCACT	2890	AGTTAAAA	680	CCCCTACCA	456
				ATACGT	5607	CCGAAAC	2890	CTCGCCAC	680	CCCTCCACG	456
				TATCTC	5606	CGGGACC	2889	AATATATT	680	ACCCCTCCG	456
				AAGAAA	5605	CCTAACG	2889	CACCTTCC	679	CGGCCGGCC	456
				AGAAAA	5601	CGCACAT	2888	TTGAAAAA	679	TACCCCCTC	456
				ATGCCG	5599	CTTCTAC	2888	AAACATAT	679	CGACCCCTC	456
				GAACGA	5594	CGTCACA	2888	ATACCAAA	679	CCACCGACC	455
				CGTTAC	5594	GCCTAAC	2888	TTAAATTA	679	AACCCCTCC	455
				TTCGAC	5593	GCACACT	2887	CTCCCGAC	679	CACCCCGTC	455
				CGCATG	5589	AACAACA	2887	GCCTCCGC	679	CCCTCCCAG	455
				CGCATT	5589	ACACTGC	2885	TAAAGATA	679	CTCACCCAC	455
				TTAATA	5587	GAACACC	2885	CTCCACGC	679	CCTCCAGCC	455
				TCTCAT	5583	ACCGCTA	2885	AACCCCCG	679	CCCATCCCA	454
				ACAGGT	5581	ACACGTC	2884	CTCCTACC	679	CCACACTCC	454
				TCCGTC	5580	CACCGTA	2881	ACAATAAC	679	CCCTACCTC	454
				TTCGCA	5578	CTCTTAC	2881	CCCTCTCT	679	CACACCCCT	454
				CGTACG	5577	AACGCCT	2879	TAAATACA	678	CGCACCCTC	454
				ATCTAT	5576	CCTGCAA	2879	AAATATTT	678	CAACACCCC	454
				TCATCG	5575	CCGGGCA	2878	ACACTCTC	678	CCTACCCTC	454
				TATTAC	5572	GACGCCA	2877	CCCCTTCT	678	TCCCCACAC	453
				AGAACT	5570	ACCATTC	2876	CCCGTCGC	678	CCTCCCACG	453
				ATGTCC	5570	ACCAAGC	2876	GCCACCCG	677	CCCAACCCG	453
				CGTCTA	5568	ACGGGCC	2876	AGCGCCCC	677	CGCTGCCCC	453
				AGACAG	5568	CAACCTG	2876	CCCCGGAC	677	GGCCCCCTG	453
				CAAAGG	5564	CAAGCCT	2876	ACTACCCA	677	CGCGCCCGG	453
				TTTAAC	5563	CCTCTTA	2876	AACAATAT	677	CACCCCACT	453
				AGATAC	5563	AGCCAAC	2875	CTACCCCG	677	ACACCTCCC	453
				ATAATT	5557	CTTCACT	2874	AACAATTA	677	CCCTCCAAC	452
				ATTCTA	5557	CCATCAT	2874	GATATAAA	677	ACCCGCCCT	452
				AGACGA	5556	ATCGACC	2873	TAAAAGTA	677	CGCTCCCAC	452
				CCAGTT	5554	GACCCTT	2873	GCCTTCCC	676	TGCCCTCCC	452
				CGTAAA	5553	ATATCCC	2873	CACACGCC	676	GCGCGCCGC	452
				CGTGAC	5551	CTCTCAA	2871	ACCGCCCG	676	CCCCTCCGT	452
				TGCCGA	5551	ACAATCC	2871	GAAAAAAC	676	AGGGACCCC	452
				ATCCGT	5550	TAACCTC	2871	TTCACCCC	676	CAGACCCCC	452
				ACGTGC	5547	CCACTTT	2870	CCCTCACG	676	ACTCCCCCT	452
				GGCCAT	5546	ACCTAGC	2869	TCCCCGGC	676	CACCCTCCA	452
				AGAGCC	5545	CTTGCCA	2868	GCCCTGCC	675	GATCCCCCC	451
				GGATCC	5545	CCACGTA	2867	TAATTATA	675	CCCTCCACT	451
				AGCCTG	5538	CACAGTC	2866	AACCCGCC	675	CTACCACCC	451
				CCTGGG	5533	GTACACC	2865	AAATTATT	675	CGGCCCCAG	451
				CATGCT	5530	TACACGC	2865	ACCTCGCC	675	CCTACACCC	451
				AGCTAA	5529	GACGCAC	2864	TAAATTTA	675	CCCCCTCTG	451
				GATCAA	5528	TATCCCA	2863	CCCTGCCT	675	CACCCTCAC	451
				CTAGTA	5527	CGAACCA	2862	CCTACCAA	675	CGCCGCCCT	451
				GACGGC	5523	CACCATG	2861	AACGAAAA	674	CGCCCCTCG	450
				GCTATC	5523	CATATCC	2861	TCCCTGCC	674	TCGCCCCCT	450
				AGCAGC	5522	CTTCCTA	2860	CTAATAAA	674	CCGACCTCC	450
				CGTCCT	5521	CACGGGC	2859	ACAAGAAA	674	TCTACCCCC	450
				GAATCA	5519	AACCGCA	2859	CCCGCTAC	674	GCCCCCGAG	450
				GATTCC	5519	CCTCAAT	2858	AAGAAACA	674	CCGACCCCT	450
				AGCTCA	5517	TACCATC	2858	CAATAATA	673	CCCTTCACC	450
				CTGATC	5514	CTCTACT	2857	CTCCACCT	673	CCACCCATC	449
				CGTTCA	5511	TAGGCCC	2856	CCTTCTCC	673	CCCTCCGTC	449
				GTCACG	5510	TCGACCA	2856	ACAAACAT	673	GCCGCGGCC	449
				TGCGCA	5506	CAGCTAC	2856	CCGCGCGC	673	CCCTCGCGC	449
				TGTCCA	5504	AGCCTAC	2855	AATAGATA	673	CGCCCTACC	449
				TATATA	5501	CACTTCT	2854	TCTCCGCC	673	CACCGCCGC	449
				TATTAA	5500	GGCCAAC	2854	GAATTAAA	673	GCCGGCGCC	449
				ATTATA	5500	TACCTCA	2853	CCGCGCTC	672	CCCACGCAC	449
				GATAAA	5500	TACACCG	2853	ACCACCTA	672	GGCCCTGCC	449
				TAAGAC	5500	CTAACCG	2853	CATGCCCC	672	TCGCCCCAC	449
				CGATGC	5499	CCTGCTA	2851	AGAGAAAA	672	CTCGCCCGC	448
				CTTCTT	5498	TCACACT	2851	TAAGATAA	672	GGCCCCACA	448
				CAGTAA	5496	CACTAGC	2849	ACACACTA	672	ACCCCTCTC	448
				AGCATA	5493	CAGACGC	2849	CCACCTCG	672	CCCGAGCCC	448
				TGGCCA	5493	CATACCG	2848	CCTACAAC	672	CACCCCGGG	448
				ATTTCA	5490	CCAGGAC	2848	ATAGAATA	672	GGCCCCCAG	448
				AACTGT	5489	CCAGGCA	2847	AATAACAC	672	CCCCCCTTT	448
				CTGGAC	5488	GCTACCA	2847	ATTAAGAA	672	CCCGGCCTC	448
				CAAGAG	5486	CTCAACG	2847	ACAACAAT	672	CCCCTTCAC	448
				AGAAAC	5485	TTGCCAC	2846	ACACCACT	672	CTCCCCCAA	447
				CTCGTC	5484	CCATACG	2846	AAAACTTA	671	CGCCCTCCG	447
				CTGAGC	5484	CATCCAT	2845	AGTAAAAT	671	CCACTCCAC	447
				TTCTAA	5482	ATTGCCC	2844	ACCCCTCG	671	CCCGCGCCT	447
				CGCTAT	5478	CACGATC	2843	GCCACTCC	671	AACACCCCC	447
				GAAACT	5477	AGCCCAA	2843	ACACTAAA	671	CCCCCTCAT	447
				CCGGAA	5476	CTGGCCT	2842	ATAAAGTA	671	ACCCCTCGC	447
				CGCGTC	5474	CGCCATA	2841	ATTATATA	671	AGCCCCCGG	447
				TCATAT	5474	CAAACGC	2840	CCCCCGTA	671	CGCCGCCTC	447
				GAACAG	5473	GACACGC	2839	ATAACTAA	671	CCCCGCCAT	447
				TATCGC	5472	GATACCC	2839	AACAAAGA	670	CTCACCCCA	447
				CAATGT	5470	CCCTAGA	2839	CCCCTCGT	670	TCCCCCAGC	447
				CCGATG	5468	AAGCACC	2838	AATAATTT	670	GCCGCCGCG	447
				TGCCAT	5466	ACCACGT	2837	AAAGATTA	670	ACCCGCCTC	446
				TATTCA	5466	TCCTAAC	2836	ATAATACA	670	GGCCCCCGT	446
				CTCGAG	5466	AGCCCTA	2835	ATAGAAAT	670	CCCACTCAC	446
				CTTAAG	5464	CGACCTT	2835	TTATTAAA	670	CGCCTACCC	446
				CTCGGA	5464	GCACCAA	2833	AAGTAAAT	670	CCGCCACTC	446
				TAAATC	5460	AATGCCC	2833	GGCCCCCA	669	CATCCCCCA	446
				TCAGCG	5460	GGCGACC	2833	ATAAGATA	669	CCCCGGCCT	446
				TCTCGA	5456	CTTCCAA	2833	AGATATAA	669	CAAGCCCCC	446
				CTCTTT	5456	TGGACCC	2831	CCCAGCTC	669	CGTCACCCC	446
				GCAGGC	5456	CTGACCG	2829	AAATATCA	668	CCACTCCGC	446
				TTTAAA	5455	ATGGCCC	2828	GTTAAAAA	668	CCACCCTCT	446
				CTGCAT	5455	CACCGAA	2828	CGAACCCC	668	CCGCGGGCC	446
				AACGAG	5450	ACCTACG	2827	ACATAACA	667	AGGACCCCC	445
				AATAGC	5446	TACAGCC	2826	CCCCCAGG	667	CCCGTCCAC	445
				GAAAAC	5446	CCTTATC	2825	CCCGGCGC	667	GCCGGGCCC	445
				ACTCGG	5442	CTCAGAC	2825	CCTCACAA	667	CACACCCTC	445
				GTCTAC	5442	CCCTATT	2824	ACACCTCA	667	ACCATCCCC	445
				AATTTA	5440	ACACTCT	2823	CCCCTGCA	667	CCTCCCTGC	445
				GGCTAA	5438	CCCGATA	2823	ATACAAAC	667	GCCCGCGCG	445
				AACGGA	5436	ACGCACT	2822	AAACACTA	666	CACTCCGCC	445
				ATTCAT	5436	TGACCCT	2821	CTCCCCTG	666	CCTCACCAC	445
				GGGACA	5434	ATCACTC	2821	ACACTACC	666	ACCCCCTCG	445
				AAATCG	5431	ACACCGT	2821	TCGCTCCC	666	CCACCACTC	444
				CTTTCA	5431	GCGACCA	2820	GCGCCCCG	665	CTTCCCCGC	444
				CGATCT	5428	ACACCAG	2820	AACAGAAA	665	CCCTCAACC	444
				AAATAG	5428	AACCCGA	2820	CTCCCTCA	665	CCGTCCCGC	444
				AATCAG	5426	GACCTCA	2819	TGAAAATA	665	CACTGCCCC	444
				CTTGGC	5426	ATTCCAC	2818	ATTAATTA	665	CCCAACCTC	444
				CCGATT	5426	CACGACG	2817	CCCGCACT	665	CCCCCGAAC	444
				GCATTA	5424	ACAACAA	2817	TGTAAAAA	665	CGCGCTCCC	444
				CTTGAA	5421	GGACACC	2816	ACACGCAC	665	TTACCCCCC	443
				GTAAAC	5420	GACATCC	2813	CGCACCCA	664	CCCTTCCCG	443
				TCATGA	5420	TCTACCA	2813	CGGCCCCA	664	GACCCCCGG	443
				AAATTT	5418	TAGCCAC	2813	CGACCCCT	664	CACCAACCC	443
				CGCAGG	5418	GACCCAT	2813	ACATCCCA	664	TCCTACCCC	443
				ATATGC	5417	AGCACCT	2812	ACCAACAA	664	CGCTCCCGC	443
				ACGCTG	5415	ACTATCC	2812	AAAAATTC	664	CCCAGCCCT	443
				GGAACA	5415	CACCGGG	2812	AATAATGA	664	CCCCCAGCT	443
				CTCTTG	5411	GACCGAC	2812	TACTAAAA	664	CTCCCCTAC	443
				TAAAGC	5408	CTGGGCC	2809	TGTCCCCC	663	ACCCCGCCT	442
				CTTAGA	5408	TTCCAAC	2808	CCACTAAC	663	TCCGCACCC	442
				CTTTGC	5407	CCAGACT	2805	CAGCCCGC	662	CCTCGCCGC	442
				TTTCAA	5404	TCACTAC	2805	ATACACAA	662	CACACGCCC	442
				AATAAG	5404	CACCTAG	2805	GCGGCCCC	662	GCCCCCTGG	442
				GGCCAG	5401	ACAAGCC	2804	CAACCCAA	662	CCTACCCCG	442
				TCTAGC	5398	CGATACC	2804	TAAATGAA	662	CTCACCGCC	442
				TCTCAG	5397	CCTCTAA	2804	ACAAAATT	662	CGCCAGCCC	442
				AATAGA	5397	CACTCTT	2802	TCCAGCCC	662	CGCCACTCC	442
				GCCGTA	5396	CAACTGC	2802	AAAATACC	661	CGACTCCCC	442
				AGATCA	5396	AAACTCC	2802	AAAGAATT	661	ATACCCCCC	442
				TGTACA	5394	ACCTCAT	2801	GATAAATA	661	CCCCGGTCC	441
				CGATTC	5394	GCCAAAC	2800	GTCCACCC	661	CACAACCCC	441
				GATGCC	5394	CAATGCC	2800	AAACACCC	661	GGCGCGCCC	441
				TTTTCC	5392	GCGCACA	2799	AGAAAAAC	661	CTCCCCACG	441
				GACTCG	5385	TTCCCAA	2798	TAAAGAAT	661	GGGCCCTCC	441
				TAATTA	5384	ACATCCT	2797	TAAGTAAA	661	CGCGCCTCC	441
				ACTTTT	5382	CCTAAGC	2796	AAACACAC	661	GGCCCAGCC	441
				TTGACA	5382	ATCTCAC	2794	AGATAAAT	661	CACGGCCCC	441
				TGCTCA	5379	CACTTTC	2794	AAAAACTT	661	CCCCAGACC	441
				GTACTA	5375	ACGGACC	2793	TGATAAAA	660	CCCGCTACC	440
				CGGGCA	5371	ACCCTTT	2793	AAGTATAA	660	CACTACCCC	440
				TAACGT	5369	CATCATC	2792	TATAAAAG	660	CCCCACCTT	440
				ACGGGC	5367	CAGTCCA	2792	TCAAAAAC	660	CACCCATCC	440
				GGACTC	5366	CCACGAA	2792	TAGAAATA	660	GGCGACCCC	440
				TGACTA	5362	ACGTCCA	2791	ACACAAAT	660	CCACCTACC	440
				ATGAAC	5362	CAACTCT	2791	ATCATAAA	659	CCACTCACC	440
				TTCATA	5362	GGCCCTA	2790	GTAAAAAT	659	CCCTCCTCA	440
				ACAGTT	5358	CTCCTTA	2790	TAAACAAC	659	CAGCCCCTC	440
				GTGCAC	5354	CGCGACA	2790	ATACCCAC	659	CCCTGCACC	440
				GACATT	5353	TACCACG	2789	ATAAACAC	659	ACCCTTCCC	440
				GCGCTA	5352	CTAAGCC	2789	TCACAAAA	659	CGCACCTCC	439
				CTGCAG	5352	ACATTCC	2789	AAGTAATA	658	TACCCGCCC	439
				TAAAGA	5348	CAGGCGC	2788	CTCCCACT	658	CCCACCTTC	439
				CTTTTA	5346	ACGACTC	2788	TGCCCCCT	658	CACCTACCC	439
				GTCAAA	5344	ACCCATG	2787	ATTAATAT	658	TCCCCCAAC	439
				GAAACG	5344	AACTCCT	2787	TATAATTA	658	TCTCCCGCC	439
				ATCCGG	5342	GCCGACA	2787	AATTTATA	658	CCCCCATTC	439
				TAAAAG	5342	CCTAGCA	2785	ACAAATAC	657	CTCCCCTGC	439
				TTTGCC	5340	TTTGCCC	2785	GCCCCGTC	657	CCCGCTCAC	439
				TACAGG	5337	CCGTCTA	2784	CCCCCAGT	657	GCCCCACGG	439
				TGCGAC	5334	CACAGCT	2784	TGAAAAAT	657	TACACCCCC	438
				ACGAAT	5332	GCGACCT	2784	AACATTAA	657	AACCGCCCC	438
				GTTACA	5331	GAACCAC	2784	GTACCCCC	657	CCACTACCC	438
				ACTTAG	5330	TTCACCT	2783	ATAGTAAA	657	CCGCCTCAC	438
				GGTCAC	5326	CATGCCT	2783	CCCACAAA	657	CCTCCACAC	438
				AAGACT	5325	ACCGTAC	2783	CTTTCCCC	656	CCCTGCCTC	438
				GTTCAC	5323	ACACGCT	2783	ACTCACTC	656	CCCCAGCCG	438
				GCCGGG	5323	CGACGAC	2783	GCCCCTGC	656	GGCGCCCCA	438
				CGAGCG	5322	CGTCAAC	2783	GACCCCCT	656	CGCCTCACC	438
				CATTAG	5316	GAGACCC	2782	GCCCCGGC	656	CCTCCGCGC	437
				TGTCAC	5316	ATGCCCT	2780	GAAAACAA	656	CACGCCCTC	437
				TCGCTC	5316	CTTCGAC	2780	CTCCTCGC	655	CACCTGCCC	437
				ACTAGT	5314	GGGCGCC	2780	AAAAGAAC	655	CCAACACCC	437
				GCATCG	5313	TTCCCTA	2779	CCCCGAGC	655	CCCCTCCAT	437
				AGTCCT	5313	CCAGCTA	2778	ATAACCAA	655	CGCTACCCC	437
				GATCCG	5311	ACCCGGG	2778	TTATAAAT	655	TCCCCCTCA	437
				TCCTTG	5310	ACAACCG	2776	CACCCTGC	655	CCCGGTCCC	436
				ATTCGC	5310	TATCACC	2776	ACTACAAA	655	CGCCCCCTT	436
				CCGTAT	5306	CGACATC	2773	ATAAAACT	655	CCACAGCCC	436
				GCGACG	5300	CTAATCC	2772	AATTAATT	655	CCTACCACC	436
				GTTCCA	5298	CCACAGT	2772	GAAAAACA	655	GCCCTGGCC	436
				TGCATC	5296	TTACCTC	2770	CCGATCCC	654	TAACCCCCC	436
				TGCCAG	5295	ACGCCTT	2770	AATATTTA	654	GGCCGCCCA	436
				GTCACT	5295	CCTGGAC	2770	CCCCTGGC	654	CCAACCCCG	436
				CTTGCG	5289	CACCAGG	2769	TTAAGAAA	654	ACTCGCCCC	436
				ACGAGA	5285	GGACCCA	2768	ATAAATTT	654	CAGCCCTCC	436
				CCTGTT	5282	CACGCTT	2768	TCACTCAC	654	CCACCCCGT	436
				AATATT	5278	ATGTCCC	2767	CGCACCTC	654	CCCCGCATC	436
				TATATC	5277	CCGACAG	2767	AACAAATT	654	ACCACCTCC	436
				CTATTT	5274	GAACCCA	2767	CCCCCTGT	654	AGGCCCTCC	436
				CGCTCT	5273	CGTGACC	2766	CGCCGCAC	654	ACCCCTTCC	436
				GCAAGA	5273	TATCCAC	2766	CACAGCCC	654	TCCCGGCCC	435
				TTCCTG	5268	TACCCGA	2766	ATTATTAA	653	ACCCTCCTC	435
				TACGTC	5267	ACTCATC	2766	CTGCGCCC	653	CCGTCCCCG	435
				GCTAGC	5264	TCTCACA	2765	ATTAAAGA	653	CAGTCCCCC	435
				GCCGGA	5256	CCCAAGA	2765	AAATTCAA	653	GCCGCCCGA	435
				TACTAG	5254	ACCGACT	2762	CACGCACC	653	GCCCGGCGC	434
				AAAGTA	5252	CGTACCA	2761	GACTCCCC	653	GGCCGCCCG	434
				TACGCT	5251	CACTTGC	2761	ACAAAAGA	653	ACCTCCCTC	434
				GATCCT	5251	CCCTTAT	2761	TGAAATAA	652	TCCTCCGCC	434
				ATTATC	5251	ACATCTC	2759	ACGACCAC	652	CGCAGCCCC	434
				GTCCCG	5251	TCCAAAC	2757	TAAAGTAA	652	AGGGCCCCA	434
				AACGTT	5249	CAACAAA	2757	CCACAAAA	652	CACCCCTTC	433
				CGGGAC	5248	GGCCTAC	2756	CCCGTCTC	652	CTCACCACC	433
				GAAATA	5247	CATGGCC	2756	CAAAAACA	651	CCGCCATCC	433
				GAGACA	5245	ATCCTAC	2754	CTGCCCGC	651	TCCCGCCAC	433
				ACGTTC	5244	ATACTCC	2753	ACATCAAA	651	CGCACCCCT	433
				GTAGCC	5242	ACCTGCA	2753	TCCCTCCG	651	CCAACCCGC	433
				AAGCAT	5242	CACGCGA	2752	AATTATAT	651	CAACCCCAC	433
				AATCTT	5240	CTGCCAT	2752	AAAAAAGC	651	TCCTGCCCC	433
				CTTTTC	5239	TTTCACC	2752	GCAGCCCC	650	GCCCACCGG	432
				ACAGTG	5234	CGGGCCT	2750	CCCCAGCA	650	ATCACCCCC	432
				CGGCAA	5232	CTGAGCC	2750	AAAAACCA	650	CCCCCGCTT	432
				ACTCGT	5229	CCTAGGC	2749	CTCTACCC	650	GGCCCCCAA	432
				TGGACC	5229	ACGCCAT	2749	CCCAAAAC	650	ACCAGCCCC	432
				TAGGCC	5226	ACAAACA	2747	GCCGCCTC	650	CACCCGCCG	432
				CTCGGG	5224	GGCCCAA	2747	TAGATAAA	650	GGCCCCGTC	432
				GCAAAT	5224	CCAATTC	2746	AAACAGAA	650	CACCCACTC	432
				GCCGAG	5222	CATCCTT	2742	TATATTAA	650	TGCTCCCCC	432
				GCAGCG	5221	CCTACGT	2739	AAAATGTA	649	CCCCTCACT	432
				AAAGCT	5220	CAACGTC	2739	CCGCCGGC	649	CTCGCCCAC	432
				GACGAA	5220	GAGCCAC	2738	TGCCGCCC	649	GCGCGCGCC	432
				AAGTCA	5219	CCTTCAT	2738	CCCAGCGC	648	TGCCCCCGG	432
				CAGCTT	5219	CAAACAA	2738	AGTGAAAA	648	TACCCACCC	432
				AAGCTA	5218	CCATAGC	2738	TAAAAACT	648	CAGCCTCCC	431
				CTAAGT	5216	TACGCCT	2738	AATACAAC	647	CCGCCCCTT	431
				TCCGTA	5212	CCATCTT	2737	AAGGAAAA	647	CACAGCCCC	431
				CCGGTA	5211	TCCCAAA	2737	ACAAAATC	647	CCTCCACCG	431
				TGGCAC	5210	CCCATTT	2736	AACATAAT	647	ACCTCACCC	431
				AGGACA	5210	CTCGAAC	2735	AAAACGAA	647	CCTCACCGC	431
				AAGTAC	5209	CCTTTCA	2735	CCGCTCCA	647	CCTGTCCCC	431
				CGAGGC	5206	CTGCGAC	2735	TTTAATAA	647	TCGCCCACC	431
				ATTGCA	5205	TATGCCC	2734	GCCGCCCA	647	AACCCCCTC	431
				TCGACG	5202	TGCCAAC	2733	CCGCCCTG	646	AGGCCCACC	431
				CTGATA	5202	ATCCCAT	2733	AACTATAA	646	CCCTCACTC	431
				ATGGCC	5200	TGGCCCA	2732	CCATACAC	646	CCTTGCCCC	431
				TCGAAC	5197	TGCCCTA	2732	CCCTATCC	646	CGCCCCTTC	431
				GCTTAA	5196	GCCCATA	2730	AAACTAAC	646	CCCTCACGC	431
				CTCTGG	5195	CCCTAGG	2730	CCGTACCC	646	CCGCCGCTC	431
				GCTATA	5195	ACCATGC	2729	CGCCCCAT	646	CCCGGCCCT	431
				CGCTAG	5187	CACGAGC	2728	CCCCGCTG	646	CTCCCACAC	430
				CCGAGG	5182	TGCCCAA	2728	GCCGCCGC	645	CCACTCCCG	430
				AATTCT	5181	CTTTCCC	2728	AAGTTAAA	645	CACGCCCCT	430
				TCCGGA	5179	CTCATCA	2728	CCCCGCAG	645	CACTCACCC	430
				GACATG	5179	CCTCATT	2727	CCGGCCCA	645	CACCGCACC	430
				ACTGAT	5177	CCAAAGC	2727	AGTATAAA	645	ACACCGCCC	430
				TGCAAA	5176	GGCCACT	2727	TAAACACA	645	GGCCGCCGC	430
				TTCTGC	5175	CTCAATC	2726	ACTCCCTA	644	CACCACCTC	430
				ATCTCG	5170	TTCGACC	2726	AATCAAAC	644	CCGCAACCC	430
				GATCTC	5169	CAACATA	2725	TAACAAAC	644	GAACCCCCC	430
				ACGTCG	5167	TCCCATA	2724	GCCCGCCG	644	GCGCCCACA	430
				TATGCA	5167	GTCCCTC	2724	GTATAAAA	644	CCCATGCCC	430
				AATGAA	5156	AAGCCCT	2724	AAAAGATT	644	TCCCCGCAC	430
				GGCCTG	5156	CATCGAC	2723	AAAATGAT	643	CACCGCCCG	429
				AGTCAA	5155	CCGCTTA	2723	AAAGAGAA	643	CCGCTACCC	429
				TATGAC	5155	AATTCCC	2723	CACAAAAA	643	GTGCCCGCC	429
				TAATGC	5153	CAAGGCC	2723	CCGCTCTC	643	ACCTCCCCT	429
				GTCTCA	5150	GGCACCT	2723	ATCAAAAT	643	CGCCGCCGG	429
				ATTAAT	5148	ACAAAAC	2722	AAACCTAA	643	GCGACCCGC	429
				AGGCCT	5147	AGCTACC	2722	CACCATCC	643	CTTCCCCCA	429
				AAAGCG	5147	CCAACGG	2721	CAAGCCCC	643	CAACCCACC	429
				ATGCGC	5146	CCTTACG	2720	ACCAACCA	643	GACCCCACA	428
				TCAATT	5143	GACTCCA	2720	AAAACAGA	643	CCCCTTCGC	428
				CCTGGT	5141	AGACCCT	2720	CCCGACCG	642	CCCATCCAC	428
				TGCAGC	5139	GGGCCGC	2719	TCCCATCC	642	CCGCTCCAC	428
				AATTAT	5139	CGCAAAC	2719	GCCCGCCT	642	CCCCTCGGG	428
				AATTTC	5132	CAATCCT	2716	ACCTAAAA	642	GCGCCCCTA	428
				CTGTGC	5130	TTGGCCC	2715	CACCCTCT	642	CCCCGTCGC	428
				CAGCTG	5128	CGACCGA	2715	ATATAAGA	642	CTCCCCGTC	428
				ATGACT	5126	GCTCGCC	2714	TAAAAAGT	641	CCCTTCCGC	428
				ATATGA	5125	CATCACG	2714	TCACACCA	641	CCGGCCGGC	428
				GACTGA	5124	ACTTGCC	2713	CCGCCAGC	641	CGCCAACCC	428
				GTAAAA	5124	CTGGCGC	2713	AAACCCCA	640	CCAGTCCCC	428
				GACTAT	5123	GGGCCTC	2712	ACCAAATA	640	GGCCCCACG	428
				CATTTT	5123	ATCTCCA	2712	ACACCGAC	640	CTCCCCAGC	428
[truncated: 63,536 more rows]
