# Supplementary material for: Circular synthesized CRISPR/Cas gRNAs for functional interrogations in the coding and noncoding genome
Source: eLife journal article supplement (doi:10.7554/elife.42549), 2019-03-06
Supplement: supp [file elife-42549-supp-v1.zip › elife_poa_e42549_Supplementary_File_18.xlsx]

## Sheet: Sheet1
guide	sequence	count
gRNA_Non-Targeting_Control_20	CGGAGTTAACCTGGAACCTT	130041
gRNA_USP17L3_2	CTACCTGCTTGTGGCCGGGA	129262
gRNA_USP27X_3	CGGGACTCGGCATCTCACAT	124054
gRNA_USP32_3	CTGTAGTATTCACGTAACTG	117672
gRNA_USP13_2	CTGGAGCATTACAGAGACAT	115808
gRNA_USP43_3	CTGCAAGGTGGGCATTACAC	112609
gRNA_USP17L29_1	CTACCTGCTTGTGCCCGGGA	112359
gRNA_USP36_1	CAGGTTGGATCGTCAAACGC	110853
gRNA_BAP1_3	CACGGACGTATCATCCACCA	108100
gRNA_USP17L7_3	CTTCCATAGAGGTGAGCAGG	106353
gRNA_USP17L5_2	GCCAGCAGCCAATGCCTGTG	100751
gRNA_JOSD2_2	CTGCCGTTCGTGGTACACGG	99152
gRNA_USP28_3	CTGAAGAGGATACTGGCCGA	96030
gRNA_USP12_3	CTTGTGATGAACTTCTTAGG	92567
gRNA_FAM188A_3	CCATATACAGGATCTATCAA	92514
gRNA_USP15_1	CCAAGTTACTTAGGCCACAG	91583
gRNA_USP4_3	CAGCTGGGACATGTACAATG	91435
gRNA_MPND_2	CTGACACGGAGTGAGGTCGT	91326
gRNA_Non-Targeting_Control_16	CAGGTTTGCACGCATAGCTA	89815
gRNA_PAN2_3	CTGTGAAAAGTACCAGCCCA	89416
gRNA_USP49_1	CACCAAACAGGTCTTAAAGG	87941
gRNA_OTUD5_3	CGGCGCAGGCTACAACAGTG	86725
gRNA_USP47_1	CTTGGCTGGACCCATAAGGT	86431
gRNA_USP12_1	CAGCACACCAGACCCAACGT	84516
gRNA_ATXN3_2	CTGTCATCCATATTTCCAGA	84505
gRNA_USP47_3	CCATAAATGAGAGTCTGCAA	84488
gRNA_USP38_1	GCTGATTATGAGCTGTCCGT	84278
gRNA_USP19_2	CAGATACAGACTGTGTGGTG	83666
gRNA_USP17L5_1	TAGACGAGAGGTCCTGTGTT	82789
gRNA_USP31_1	CAAACCTGAATGCAAACCGT	82603
gRNA_USP48_2	CTGGCGCCAACTCCGCAAGG	82030
gRNA_USP40_2	CATGGTACAGACGATAGATG	81163
gRNA_COPS6_2	CAAGGAATATTATTACACCA	81037
gRNA_PAN2_2	CTCAAGTATATGGCCCGTGG	81000
gRNA_TNFAIP3_1	CCACTTGTTAACAGAGACCG	80724
gRNA_USP17L4_3	GCTGGGTGGAGTTGTCACGA	80356
gRNA_USP35_3	CATCCATGAGCTCCAATGGG	79929
gRNA_USP17L8_1	GTACAGAGCATGCAGCACTT	78653
gRNA_OTUD6A_2	CCAAGACGTGGCCCGCATGG	78343
gRNA_USP17L30_2	CGTGGACCAGCACAGCATAG	78245
gRNA_USP14_1	TACAGGATGCTAATGAATGT	78160
gRNA_USP13_3	GCCAGGACTAAGTTAGGACA	77787
gRNA_USP49_3	CGTGCTCAATGATAACCCAG	77783
gRNA_USP17L18_2	CCTTGTTCCAGTCGACATGG	77151
gRNA_USP6_1	CCAACGGACCTGGATATAGG	76698
gRNA_USP17L29_2	TGACGTGGCCAGGATTGTGG	76401
gRNA_OTUB1_2	CAGACACAGCCTTGAACCTG	75564
gRNA_STAMBPL1_1	CCAGACCTAAAGTAACGTCG	74740
gRNA_USP20_3	CCTTTCTTGAGCACGTACGA	73750
gRNA_USP20_2	CTCACCCTTTAACTCATCAG	73500
gRNA_USP48_3	CAGACACGTAAACCCAAGTG	72989
gRNA_Non-Targeting_Control_12	CACTGCAGTATTCGTGGCCT	72814
gRNA_USP17L8_2	GGAGAGAATGCCTATCCTTG	72743
gRNA_USP17L18_1	GAGGACGACTCACTCTACTT	72398
gRNA_USP43_1	CACACCACTGACCTGTACAG	71842
gRNA_USP17L20_3	CGTCCAACTCGGGGGCCTGG	71808
gRNA_USP29_1	ACTCACTCAAGGTGTCCCAT	71221
gRNA_USP54_1	ACTGACCACAGACTCATGGT	71081
gRNA_Non-Targeting_Control_28	GGACGCACCATTCCGGGTGA	71015
gRNA_USP25_1	TGTGATGGTATGGAACCACT	70753
gRNA_USP22_1	CCTCGAACTGCACCATAGGT	70508
gRNA_USP50_1	CCTATCTGATGACAGACATG	69808
gRNA_UCHL1_3	CGCCCTACCTGGGCCGTGAG	68643
gRNA_USP18_2	ATGACCATGAGGGTAGTCCC	68504
gRNA_ZC3H12A_3	CAGGACGCTGTGGATCTCCG	68118
gRNA_USP17L19_3	CCTGTGAGGGCTGGATGACG	67239
gRNA_USP44_2	TGGTTTGAACAATCACCCAT	66987
gRNA_COPS6_3	TGGGTTGGTATACCACAGGG	66532
gRNA_Non-Targeting_Control_25	CATTAAACCTTGCCCCACAA	66500
gRNA_USP17L27_3	TTGCCAACTACATGCTGTCC	65621
gRNA_USP9X_2	ACAAGTGCTATATCTAACAG	65075
gRNA_Non-Targeting_Control_2	CAAACAGTCTAAGGCGACGA	65039
gRNA_USP21_2	AGGACCGGGCGGATATCATG	64812
gRNA_OTUD1_3	CTCCGCCGCACTACTCGGGG	64308
gRNA_USP17L13_2	CTGTGATGATTTGGTTCCTG	64305
gRNA_Non-Targeting_Control_11	GAACTGGCAAACAGGCGTGG	63631
gRNA_OTUD7B_2	TAGGAGGCCCATAGTCGTCG	63445
gRNA_ATXN3_3	CGAGTGTTAGAAGCAAATGA	63208
gRNA_USP50_2	AGGGAGCATTCATATTTGGA	63124
gRNA_FAM63A_2	AGGTCAAAGACACTGCACTC	62965
gRNA_Non-Targeting_Control_33	CGCTAGGTTATTTCGTGGCC	62762
gRNA_USP8_2	GTATTTCATATATAGTACAT	61915
gRNA_USP12_2	TTGCGTATAAGAGTCAACCT	61906
gRNA_USP17L8_3	ACACGGGTCTCAGATGAGAG	61848
gRNA_OTUB1_1	GCAGGACCGAATTCAGCAAG	61629
gRNA_Non-Targeting_Control_6	ATAGCCGCCGCTCATTACTT	61576
gRNA_OTULIN_1	ACCACGGACTCGCCGTATGG	61305
gRNA_USP3_1	CCCATTCCTTAACTCCACGG	61000
gRNA_USP17L28_2	ACACGGGTCTCACATGAGAG	60944
gRNA_USP17L1_3	GACATGGCCAGGACTGTGGA	60858
gRNA_Non-Targeting_Control_18	CCAAAAAGATGAATATCTCG	60311
gRNA_USP2_1	GCTGAGACCCGACATCACTG	60267
gRNA_USP17L2_2	ACACGGGCCTCAGATGAGAG	60115
gRNA_USP13_1	CCTGAAAAGACATGTGCGAG	59813
gRNA_USP17L30_3	CCAGCAGCCAATGCCTGTGA	59684
gRNA_USP17L20_1	GATGCTAGAGGCGGTGACCT	59475
gRNA_USP14_3	TCATGTAACAAGTGTTACCA	58771
gRNA_USP17L1_2	GCAGGTAGATCATCACTGCA	58725
gRNA_OTUD6B_2	TGCTTGAGAATCAGCCACCT	58255
gRNA_TNFAIP3_3	CTTGTGGCGCTGAAAACGAA	58115
gRNA_USP17L7_1	ACACGTTTGAGAGTCCTCCC	58058
gRNA_USP45_3	AGATTAATTATAATACAATG	58003
gRNA_USP22_2	GCCATTGATCTGATGTACGG	57972
gRNA_USP17L4_1	AGTGTGTAAAGTTAACGTGT	57589
gRNA_USP11_1	GGTCTCCATGATGATCAACT	56975
gRNA_Non-Targeting_Control_23	TTATGTGAGCACGCCATTAC	56598
gRNA_Non-Targeting_Control_22	ATCGTTGCTGACAGGATCTA	56387
gRNA_USP1_2	TGGTATTAACAGCATAGAGA	56330
gRNA_USP17L13_1	CAGGAACCAAATCATCACAG	56318
gRNA_USP17L25_1	AAGAGATTCTCCGATGTCAC	56252
gRNA_MYSM1_1	CAAGCTCAGAAATTACACTG	56171
gRNA_USP33_2	ATAGTCAAAGCAGGATCATG	56058
gRNA_USP4_1	GAAATGGCAACTCAGCACAT	55925
gRNA_USP17L28_3	GCATAGAGGACATAGACGAG	55878
gRNA_JOSD1_1	TCTACCATGAGAAACAGCGC	55698
gRNA_USP46_1	GTTCATATACCTTAGACAGT	55609
gRNA_FAM63B_3	ACCTTGTACTGCCCTCTCAG	55201
gRNA_USP42_2	GGACGCAAAGGGGATGATCG	54964
gRNA_USP46_3	TGTATGCCAACACATTCTCC	54729
gRNA_ZRANB1_2	CAGCAAGCGTACTTCATCTG	54428
gRNA_USP11_2	TGATAGGCAGTGGAACACTG	54360
gRNA_OTUB2_1	AGTGCCGGAAGAAGTCTGCT	54265
gRNA_USP9Y_2	TGGTACAGACCCCATAACAC	54237
gRNA_OTUD1_2	GCGGTGGACGTGTAGTGCGG	54088
gRNA_Non-Targeting_Control_29	GGTGCGGTCTGCTTGTAGAT	53732
gRNA_USP17L24_2	TCTGAGCTGCCTGGATATCC	53687
gRNA_PSMD14_3	TACCAACCAACAACCATCTC	53651
gRNA_OTUD3_3	GCTCTTGGTGATCAATTGGA	53636
gRNA_VCPIP1_2	CAGTCTGATGCAATATAGTG	53156
gRNA_USP29_3	TGGTTCAACGGGTAGAACCA	52854
gRNA_USP17L17_3	GCATAGAGGACATAGACAAG	52398
gRNA_USP17L25_3	GAGGGCTGGATGACGTGGCC	52210
gRNA_FAM188B3_2	TGGTTGCCTTCATGATTCTG	51847
gRNA_USP24_2	GTTTAATCCTACCTGTACCA	51766
gRNA_USP17L24_3	AGCAGGTATTTCCCATATTC	51493
gRNA_USP30_2	TGTGTGTGACAACTGTACAA	51264
gRNA_USP34_3	TTGTATCTTTGGGTGCACCA	51158
gRNA_USP30_1	TAAATCAGTACATACCCATG	51126
gRNA_BRCC3_3	GCTCTGGAGAAATTTCTACT	51029
gRNA_USP17L17_1	AATCTTGTTGCCTGTCACAT	50985
gRNA_OTUB2_2	CGCCATCCGCAAGACCAAAG	50851
gRNA_USP22_3	TGGGGCTCTGCATCTCACAG	50759
gRNA_USP17L22_1	AGTGAACATGAGAAATTCAT	50606
gRNA_Non-Targeting_Control_35	CGACAACGTGCAGGTGTATC	50418
gRNA_USP37_3	ACTCCAAATTAGTAATAACA	50403
gRNA_USP17L2_1	TGACATGACCAGGACTGTGG	50218
gRNA_USP17L21_3	GAGTAACAGGAGACCTGCTG	49790
gRNA_USP17L19_1	ACACGTTTGAGAGTGCTCCC	49763
gRNA_USP44_1	ATCACTGCACAACTCGTAGT	49623
gRNA_USP42_3	TCTCATTTATAGGCTAGCAA	49595
gRNA_USP17L10_2	TGACATGGCCAGGAATGTGG	49486
gRNA_USP18_1	AAGATCTGCCGGGGACTGCG	49341
gRNA_STAMBP_3	CCAGAGCGGAAGTACCGACG	49279
gRNA_OTUB1_3	GTAGACCACAAGGTAGTCGG	49232
gRNA_USP17L12_3	GCAGGTCTCCTGTTACTCAG	48907
gRNA_USP49_2	GGCGGCGCGAGGTGAAACGG	48455
gRNA_USP10_2	AAATAGCTGTAATATCCAGG	48422
gRNA_USP5_3	ATGGATGCAGCCCTTAACAA	48071
gRNA_Non-Targeting_Control_7	TTGTACGGTACTGGCTTTGT	48048
gRNA_USP27X_2	ACTGCTTGCGGAGGTTTACG	48004
gRNA_USP17L30_1	TGTTTGTCTCCAGAGGGCGC	47875
gRNA_USP44_3	TATTGGCCTTCGTTTAACTG	47720
gRNA_USP17L5_3	GTGTAAAGTTAACGTCTTGG	47519
gRNA_USP17L10_1	TCTCAGGGAGAGAAGTACGC	47232
gRNA_USP17L4_2	TATGCAAGCTCACATCACAT	46849
gRNA_USP17L3_3	GCCAGAAGCCAATGCCTGTG	46804
gRNA_USP19_3	GAGCGAGGCGGGCATAAGTG	46803
gRNA_USP15_2	TCTAACTAAGTAAACTTCCA	46748
gRNA_ATXN3L_2	ATCGAGCCAAGAAATTTGCA	46655
gRNA_JOSD1_2	TGAAGCCCATGACGTTAGTG	46631
gRNA_OTUD4_1	TCTTCAATACAGGAATGGGT	46597
gRNA_USP45_2	GACGTGACTCAGAATTCATG	46314
gRNA_OTUD7A_1	TATGGGCTAGGACAAAAACG	46028
gRNA_USP6_2	TATACTCCGAATAGGCCAGG	45963
gRNA_USP21_3	GAGAAGGGACTTCCGGCAAG	45741
gRNA_USP7_2	GGCAACCTTTCAGTTCACTG	45723
gRNA_USP34_2	TCATATACCACGATTAACAG	45674
gRNA_FAM188B_3	ATACGGCATAGTGCAGAACA	45598
gRNA_USP17L18_3	GACGACTCACTCTACTTGGG	45595
gRNA_USP39_2	ACTGCCTGAAGCATCTCATG	45590
gRNA_Non-Targeting_Control_26	CTATATTGTCGCGCAGTGGA	45479
gRNA_USP17L7_2	CAAAGGTGTCTGAAACGCCG	45182
gRNA_USP39_3	AGGCGTGAGACTTCAAACCC	45037
gRNA_USP7_3	GGCAGTAGAACAGCTCGATG	44851
gRNA_USP28_1	AAAATGTTGGCAATACATGT	44658
gRNA_JOSD2_3	AGGATCAGCCCCAGTACCTG	44629
gRNA_USP5_1	ATCCTGGGTAGGGTCCGTCG	44550
gRNA_ATXN3L_3	TCAGAAAACATGGATGATAC	44399
gRNA_FAM63A_3	GTCAAGTGGATCCCTTGGAA	44230
gRNA_USP2_3	TCTGGATGGGCTCCATAACG	44224
gRNA_USP17L22_2	TACATGTCTCAGCAGAACAC	44048
gRNA_USP31_2	GGCAACGCCAGGCATCATCG	43960
gRNA_USP14_2	GCCTGCCAGACAGAAAGTTA	43936
gRNA_UCHL5_2	GTTACTGAACTGTACCCACC	43808
gRNA_STAMBP_1	AATCGATGGATTGCGCCATG	43716
gRNA_COPS5_2	GATGGGTCTGATGCTAGGAA	43378
gRNA_FAM188B_2	AAGTCTGGTCTGATTGTGCG	43172
gRNA_STAMBP_2	AAGGCCAGCTAAGCCACCTG	42631
gRNA_USP1_1	GGCGACTGCTTAACACACTG	42482
gRNA_USP46_2	TGGCAACATGAACGAACCTG	42353
gRNA_UCHL1_2	ACAGGCAGCCCATGATGCCG	42351
gRNA_USP40_1	GAAAACAGCATGGACCACTG	42097
gRNA_USP51_1	CACAGACCAGACACAAGCTG	42041
gRNA_Non-Targeting_Control_19	TGCCGTTAGCATGCGATCCC	41910
gRNA_USP48_1	TGAGATGCGTAAGCAAAGTG	41883
gRNA_ATXN3_1	TCAACAGTCCAGAGTATCAG	41669
gRNA_VCPIP1_3	CCCCTTGGTAGGCATAAAAG	41507
gRNA_Non-Targeting_Control_14	AAGAATTAGGCACGGTTACT	41494
gRNA_USP34_1	GTCTTGTATCACACGAACTG	41458
gRNA_FAM63B_2	GAGGGTCTACTAACCACCCA	41152
gRNA_Non-Targeting_Control_36	TGTGAAAGTTTATGGTGTTA	41098
gRNA_Non-Targeting_Control_8	ATCTGCCATGGCGTCCTGGC	41014
gRNA_FAM188A_2	TTGGACCAGTATTCAATGTG	40997
gRNA_Non-Targeting_Control_15	TAGACAACCGCGGAGAATGC	40803
gRNA_USP20_1	GTCGACCTACCAATTGGACA	40747
gRNA_USP26_1	GGACAGAGTTCATCAAAACG	40647
gRNA_COPS5_1	AGCAGCCTGAGCATTTACTC	40620
gRNA_USP31_3	GACTTATTACCTGATCAGTG	40522
gRNA_USP19_1	GAGGAATGACTCTTTCATCG	40512
gRNA_Non-Targeting_Control_10	TCGCGCTTGGGTTATACGCT	40421
gRNA_STAMBPL1_3	GTTAAGGCCCTGTTTACAGG	40139
gRNA_UCHL5_1	TTTATTATTTCAGGTTGCCG	40091
gRNA_FAM188B4_3	TTATTTCACATAAGTTGCCA	40071
gRNA_USP43_2	AAGTACGGCTCTCAGTTCCA	39919
gRNA_ZRANB1_1	TCAGTTCTACAAGCTACCTG	39609
gRNA_USP17L17_2	TCAAAGCTCAAGAAGGCCAA	39449
gRNA_USP26_2	ATAGTGACGGTTACACAAAG	39359
gRNA_ATXN3L_1	TGGAACATCAGACCAAGATG	39358
gRNA_BRCC3_2	AGTAATGGGGCTGTGCATAG	39355
gRNA_USP17L28_1	TATGCAAGCTCACATCACAC	39353
gRNA_BAP1_2	TCTACCCCATTGACCATGGT	39351
gRNA_USP32_1	GAATGCACATGACACCACAA	39154
gRNA_OTUD6B_3	GCGCTAGAAGAAACCTGCAC	39131
gRNA_CYLD_1	AAAGGCCTCCAAATAGACGT	39048
gRNA_OTULIN_3	TGAACTATTCACAAATGAGG	38937
gRNA_USP17L27_2	CCCTTACCTGGACATCGCCC	38860
gRNA_Non-Targeting_Control_17	AGTTCCCAGAAATATATTGC	38822
gRNA_OTUD5_1	GGTTGTGCGAAAGCATTGCA	38746
gRNA_UCHL3_1	GGATCCTGAACTCCTTAGCA	38683
gRNA_JOSD2_1	TCACCTCTTGCAGATCTCAT	38605
gRNA_USP25_3	GAGACTGAAAGATTACCTCA	38590
gRNA_USP3_3	GTTGTCACGGCTATATTCGG	38489
gRNA_USP54_3	GTGGAGCATTCATCAACACA	38372
gRNA_USP26_3	GAAGCCTAAAAGTGAATTTG	38232
gRNA_Non-Targeting_Control_27	TAAAGCAGAAGAATATACAG	38146
gRNA_OTUD7A_3	CAGAAAAGCGGCTTTCCCGG	38127
gRNA_Non-Targeting_Control_30	GTTCCCCGGGAAGTCTATGC	38047
gRNA_USP17L3_1	AACTTTACACACTTCTGCCA	38034
gRNA_USP17L15_1	CAAACGTGTCATCGTCACAA	37952
gRNA_USP21_1	AAGACAGCTCGGAATCGAGT	37891
gRNA_USP17L10_3	GGTCTCCTGCTACTCAGAGG	37842
gRNA_USP54_2	AAGGTTTACCTAAAGCACCA	37781
gRNA_USP45_1	AATGAATGGATCTTTCACCG	37650
gRNA_Non-Targeting_Control_34	GTTGATCGAAAATGGGAGAA	37512
gRNA_USP17L26_2	TCCAGGGCGATGTCCAGGTA	37360
gRNA_USP10_1	ACTGACCAAAATCAGCCCCG	36705
gRNA_UCHL1_1	AATCGGACTTATTCACGCAG	36616
gRNA_USP25_2	GGCACCAAGGCACATAACGG	36584
gRNA_USP51_2	TTGATGAGAAACATCTGTTG	36546
gRNA_Non-Targeting_Control_32	GAGTCGAAGATGGTCTAGGA	36422
gRNA_USP9X_3	TCATGGCGATAAAACACATG	35916
gRNA_USP35_2	TCAAGGAGGACTCGAACTCG	35910
gRNA_FAM63B_1	TAGCTGCGAGTTCAATAGTG	35830
gRNA_OTUD6B_1	AAAGGATTGTGCTCTGACTG	35753
gRNA_USP17L21_2	AACTTTACTCACCTCTGCCA	35675
gRNA_USP36_2	GAGCACACGTATGAGAGCTG	35647
gRNA_COPS6_1	GGTTCAACTTCAGAAAGAGG	35537
gRNA_TNFAIP3_2	TATGCCATGAGTGCTCAGAG	35526
gRNA_STAMBPL1_2	AAGAAGCAAGAGTTAGCCCG	35445
gRNA_FAM188A_1	GCTGTTTCTAATGTATGGGA	35173
gRNA_OTUD1_1	GCTCTTCGCCCCACGGACCG	35156
gRNA_USP11_3	GTGGGCGAGAACGTCCACTG	35145
gRNA_USP36_3	GATCTGGAATCACACTCGGG	34746
gRNA_Non-Targeting_Control_9	GTCCTCATCCGGTCAGGCTG	34672
gRNA_USP16_2	TTAAGACACAGCCAAACTGA	34590
gRNA_USP10_3	ACAACCGAGAATAAATTCAG	34515
gRNA_USP33_3	TCATCAAATACGGCAACCAG	34503
gRNA_USP37_1	AGGGTTGCTAGAAAATCGGT	34388
gRNA_USP17L12_2	GAGTAAAGTTAACATCTTGG	34331
gRNA_UCHL3_3	GGTCTCATGAGTAACTCGGA	34305
gRNA_CYLD_2	ATATTCAAGATCGTTCTGTG	34212
gRNA_USP47_2	TGATCGAATGACATTTCCCG	33529
gRNA_USP33_1	AACAGTCGACTTAAACAACC	33464
gRNA_FAM63A_1	AGTCATCCCTGAAAACCATG	33282
gRNA_FAM188B_1	AAGATGCTCAGAGACTACAC	33016
gRNA_OTUD6A_3	GGCCGGCTTCAAGCGCGAGG	32953
gRNA_Non-Targeting_Control_31	TGACGCTCCACGTCCGGACC	32815
gRNA_BAP1_1	GTCCATCAAGACTAGCAGCG	32746
gRNA_OTUD3_2	GTGACCTACCTGCCACAAAG	32653
gRNA_BRCC3_1	GAGCGTGGTTGAGACAAACG	32530
gRNA_YOD1_2	AGTGTGTACTATGTCGTCGA	32496
gRNA_MYSM1_2	GAGATGTTAATTGTATTGGA	32384
gRNA_USP38_3	TCTCTATGAACCTATTCTGG	32372
gRNA_USP17L21_1	AAAGTTAACATCTTGGAGGC	32314
gRNA_OTULIN_2	ATTGCTTATACATGAAAGAG	32297
gRNA_OTUD4_2	TTACCTGTACATAAGAGAAA	32177
gRNA_USP17L25_2	TGAATTTCTCATGTTCACTG	32171
gRNA_Non-Targeting_Control_3	AAATAATATGCATCTCTCGA	32143
gRNA_USP17L13_3	ATGAGGGTGGTGTCCTTAGA	32126
gRNA_USP2_2	ATAGCTACCGGATAGACCCC	32021
gRNA_USP17L1_1	TCAAAGCTCAAGAAGTCCAG	31955
gRNA_USP40_3	TCGAGCTAATCCAAGATATG	31891
gRNA_MPND_1	AGTCTGACCTGGCCAAGTCG	31797
gRNA_OTUD7B_3	TAGTGTAATTCTGTCCCTAG	31712
gRNA_USP4_2	TCAACAGAGACAACCCTCTG	31701
gRNA_ZC3H12A_2	GGAGTGGAAGCGCTTCATCG	31545
gRNA_CYLD_3	TGAGACTGAATGGTAAAGAG	31385
gRNA_Non-Targeting_Control_13	AAGCCATTGTATAACTCCAG	31328
gRNA_USP7_1	AGATGTATGATCCCAAAACG	31283
gRNA_USP28_2	AGAAGTGGAAGCCCTATCTG	31151
gRNA_USP29_2	TACATTTAGTAGGCTCTCCA	31056
gRNA_FAM188B2_1	TCACTTACTATGTTTCAGAG	30663
gRNA_USP17L20_2	CCAAGTGCTCGTCCAACTCG	30572
gRNA_USP17L15_3	GACAGAAGTGATGCTAGAGG	30492
gRNA_PSMD14_1	AAACACATCAATCACTCTGA	30308
gRNA_ZRANB1_3	GAGTCCCGCTTCGTAGCAGG	30002
gRNA_UCHL5_3	GAATTAGATGGATTAAGAGA	29971
gRNA_USP17L11_2	TTGGCTGCTGGCTTCCATAG	29875
gRNA_USP9Y_3	TGATGGTCCCAATCTAGAGG	29802
gRNA_USP32_2	GGAAAGAATGCTCCACGTGG	29676
gRNA_UCHL3_2	GCCGCTGGAGGCCAATCCCG	29646
gRNA_USP3_2	CTACACTTGGAACTTCAGGG	29583
gRNA_ZC3H12A_1	CAGCTCCCTCTAGTCCCGCG	29546
gRNA_JOSD1_3	GGACAGCAATGCCTTCACCC	29470
gRNA_USP27X_1	TAAACCGATCGTAAAGCTGG	29369
gRNA_USP16_1	AAGGAAAGATTCATGAACCA	29256
gRNA_USP24_3	TCTCCAACTAGTATTATGAG	29255
gRNA_USP16_3	GTGTTACGTATGTGATAATG	29109
gRNA_USP17L12_1	TACATGTCTCAGCCGAACAC	28566
gRNA_OTUD6A_1	TGCGCCGCCACCAACGCGAG	28224
gRNA_OTUD7B_1	AAGCGTTGAAAAGGCGCTGG	28024
gRNA_OTUD7A_2	TCTCTGTTCCATGGACACAA	27859
gRNA_USP39_1	GAACATCAAACGTCCTCCAG	27778
gRNA_USP8_1	ATGAAGGAGCCATTTCCGGT	27736
gRNA_USP9Y_1	TAACAATACTCATCGCCTAG	27705
gRNA_USP24_1	AGACACGGACAACTGTCGGT	27399
gRNA_Non-Targeting_Control_24	GTGCGTGAGTATTAACGCTC	27369
gRNA_USP17L24_1	GACCTGCTGCGGTGGGGGCT	27119
gRNA_USP17L19_2	TACATGTCTCAGACGAACAC	26826
gRNA_USP1_3	GAAGTTAAACCCATAAACAA	26402
gRNA_PAN2_1	GTTCCACCTTAAAAGTACGG	26347
gRNA_USP5_2	GGAGAAGTTTGAATTAGACG	26214
gRNA_VCPIP1_1	GTGTAGCACTACGTCCGGGT	26206
gRNA_USP17L15_2	ACATGTATAGCTTCATGTCA	25424
gRNA_USP17L26_3	TCCAAATATTTGGTGGATGA	25323
gRNA_OTUB2_3	GATTTACCGGAGGAAAATCG	25322
gRNA_PSMD14_2	AGCCTTGTCGGAGAGAGCTG	24868
gRNA_Non-Targeting_Control_4	AAATTGGCTTTCGTTCGTGC	24654
gRNA_USP8_3	TGAAGTCCGGAAAAAACTTG	24402
gRNA_USP17L11_1	TGCCAACTACATGCTGTCCC	24110
gRNA_USP6_3	TCTCCGGAACCTGATTGACG	23353
wildtype_CTAGGGATAACAGGGTAATT	CTAGGGATAACAGGGTAATT	23281
gRNA_MPND_3	ACAAGAGTCGGAGACCACTG	22989
gRNA_Non-Targeting_Control_5	TTAACTCGAACGCTCGAAAG	22865
gRNA_YOD1_3	GAGGATTCGCTGACCGCCGG	22849
gRNA_OTUD4_3	GAACAGAGAGAAATTTGAAG	22318
gRNA_USP51_3	TCCATGCAGAACATTTAGCA	21578
gRNA_OTUD5_2	GAATGCCATAAAAACATCGG	21521
gRNA_USP17L2_3	ATTGCGGTCTTTGTCTCCAG	21351
gRNA_USP30_3	AGGTGTTCCCTAAATTAACA	21348
gRNA_USP42_1	AAATATCTGACAAACAAGAG	21083
gRNA_USP35_1	AGAACTCGGCGAAGACGTCG	20057
gRNA_USP15_3	AAGGTGTTCCTTAAGTGACT	19912
gRNA_MYSM1_3	ATGGTGTTATCCAAGGTCCA	19799
gRNA_COPS5_3	GGGTGGTATCATAGCCACCC	19574
gRNA_Non-Targeting_Control_21	TCCGGAGGCTCAAACCAAGT	19351
gRNA_USP9X_1	TCATACTATACTCATCGACA	18826
gRNA_USP17L27_1	AGCCCAGCCCCCACCGCAGC	18358
gRNA_Non-Targeting_Control_37	GCGAATGCCTGAAAGTATAA	18339
gRNA_USP38_2	GAAGCCTCAAAGAATATCCG	18263
gRNA_OTUD3_1	AGCACTACGACAGTGTTCGG	18250
gRNA_YOD1_1	GCGGAGCCGCCACATCGTGT	17815
gRNA_USP17L22_3	TCAAACGTGTCATCGTCACA	16291
gRNA_USP18_3	TCAGGTGTTCGTAATGAATG	13865
gRNA_USP50_3	GTGAGAAAGTATTCCACCAG	10277
gRNA_USP17L26_1	TAGCAGGAGACCTGCTGCGG	10041
gRNA_USP17L11_3	GTGTTCGTCTGAGACATGTA	6240
gRNA_USP37_2	AATGTGGTGCTTCGACCCAG	5571
gRNA_USP17L29_3	ATTGTGGTGTTTGTCTCCAG	1902
gRNA_Non-Targeting_Control_1	AAAACATCGACCGAAAGCGT	5
