# Supplementary material for: Circular synthesized CRISPR/Cas gRNAs for functional interrogations in the coding and noncoding genome
Source: eLife journal article supplement (doi:10.7554/elife.42549), 2019-03-06
Supplement: supp [file elife-42549-supp-v1.zip › elife_poa_e42549_Supplementary_File_19.xlsx]

## Sheet: Sheet1
R1 T0			R1 T11			R1 T21			R2 T0			R2 T11			R2 T21
guide	sequence	counts	guide	sequence	counts	guide	sequence	counts	guide	sequence	counts	guide	sequence	counts	guide	sequence	counts
gRNA_Non-Targeting_Control_20	CGGAGTTAACCTGGAACCTT	97386	gRNA_Non-Targeting_Control_8	ATCTGCCATGGCGTCCTGGC	7505	gRNA_USP28_3	CTGAAGAGGATACTGGCCGA	1747857	gRNA_USP17L3_2	CTACCTGCTTGTGGCCGGGA	200934	gRNA_USP28_3	CTGAAGAGGATACTGGCCGA	544592	gRNA_Non-Targeting_Control_1	AAAACATCGACCGAAAGCGT	543926
gRNA_USP32_3	CTGTAGTATTCACGTAACTG	95150	gRNA_USP2_2	ATAGCTACCGGATAGACCCC	4935	gRNA_USP28_1	AAAATGTTGGCAATACATGT	509755	gRNA_USP27X_3	CGGGACTCGGCATCTCACAT	200849	gRNA_Non-Targeting_Control_20	CGGAGTTAACCTGGAACCTT	364285	gRNA_USP28_3	CTGAAGAGGATACTGGCCGA	246674
gRNA_USP17L3_2	CTACCTGCTTGTGGCCGGGA	94798	gRNA_USP50_3	GTGAGAAAGTATTCCACCAG	1458	gRNA_USP28_2	AGAAGTGGAAGCCCTATCTG	454081	gRNA_Non-Targeting_Control_20	CGGAGTTAACCTGGAACCTT	193349	gRNA_Non-Targeting_Control_1	AAAACATCGACCGAAAGCGT	322429	gRNA_USP28_2	AGAAGTGGAAGCCCTATCTG	88273
gRNA_USP27X_3	CGGGACTCGGCATCTCACAT	93545	gRNA_USP1_2	TGGTATTAACAGCATAGAGA	2951	gRNA_USP43_3	CTGCAAGGTGGGCATTACAC	287428	gRNA_USP32_3	CTGTAGTATTCACGTAACTG	191911	gRNA_USP43_3	CTGCAAGGTGGGCATTACAC	276259	gRNA_USP28_1	AAAATGTTGGCAATACATGT	77700
gRNA_USP36_1	CAGGTTGGATCGTCAAACGC	91557	gRNA_OTUB1_2	CAGACACAGCCTTGAACCTG	10256	gRNA_Non-Targeting_Control_20	CGGAGTTAACCTGGAACCTT	278141	gRNA_USP36_1	CAGGTTGGATCGTCAAACGC	185927	gRNA_Non-Targeting_Control_16	CAGGTTTGCACGCATAGCTA	265807	gRNA_Non-Targeting_Control_20	CGGAGTTAACCTGGAACCTT	54645
gRNA_USP13_2	CTGGAGCATTACAGAGACAT	90671	gRNA_USP18_1	AAGATCTGCCGGGGACTGCG	14460	gRNA_USP27X_3	CGGGACTCGGCATCTCACAT	257312	gRNA_USP13_2	CTGGAGCATTACAGAGACAT	183503	gRNA_USP28_2	AGAAGTGGAAGCCCTATCTG	264624	gRNA_BRCC3_3	GCTCTGGAGAAATTTCTACT	53889
gRNA_BAP1_3	CACGGACGTATCATCCACCA	88197	gRNA_USP2_1	GCTGAGACCCGACATCACTG	7782	gRNA_Non-Targeting_Control_16	CAGGTTTGCACGCATAGCTA	247688	gRNA_BAP1_3	CACGGACGTATCATCCACCA	180978	gRNA_Non-Targeting_Control_7	TTGTACGGTACTGGCTTTGT	251621	gRNA_USP43_3	CTGCAAGGTGGGCATTACAC	46721
gRNA_USP17L29_1	CTACCTGCTTGTGCCCGGGA	86144	gRNA_USP21_2	AGGACCGGGCGGATATCATG	10031	gRNA_BRCC3_3	GCTCTGGAGAAATTTCTACT	246729	gRNA_USP17L29_1	CTACCTGCTTGTGCCCGGGA	174246	gRNA_USP17L7_3	CTTCCATAGAGGTGAGCAGG	240283	gRNA_USP17L7_3	CTTCCATAGAGGTGAGCAGG	41033
gRNA_USP17L7_3	CTTCCATAGAGGTGAGCAGG	83764	gRNA_USP47_1	CTTGGCTGGACCCATAAGGT	8890	gRNA_USP17L7_3	CTTCCATAGAGGTGAGCAGG	244158	gRNA_USP28_3	CTGAAGAGGATACTGGCCGA	168371	gRNA_Non-Targeting_Control_6	ATAGCCGCCGCTCATTACTT	239538	gRNA_USP32_3	CTGTAGTATTCACGTAACTG	39626
gRNA_USP28_3	CTGAAGAGGATACTGGCCGA	82931	gRNA_VCPIP1_1	GTGTAGCACTACGTCCGGGT	4050	gRNA_Non-Targeting_Control_22	ATCGTTGCTGACAGGATCTA	236828	gRNA_USP17L7_3	CTTCCATAGAGGTGAGCAGG	165527	gRNA_USP13_2	CTGGAGCATTACAGAGACAT	239305	gRNA_USP13_2	CTGGAGCATTACAGAGACAT	38712
gRNA_USP12_3	CTTGTGATGAACTTCTTAGG	82747	gRNA_USP17L17_3	GCATAGAGGACATAGACAAG	4563	gRNA_USP34_3	TTGTATCTTTGGGTGCACCA	235653	gRNA_USP43_3	CTGCAAGGTGGGCATTACAC	162282	gRNA_USP17L8_2	GGAGAGAATGCCTATCCTTG	231326	gRNA_Non-Targeting_Control_7	TTGTACGGTACTGGCTTTGT	38197
gRNA_USP43_3	CTGCAAGGTGGGCATTACAC	81617	gRNA_USP19_3	GAGCGAGGCGGGCATAAGTG	6792	gRNA_Non-Targeting_Control_11	GAACTGGCAAACAGGCGTGG	232804	gRNA_USP12_3	CTTGTGATGAACTTCTTAGG	161955	gRNA_BRCC3_3	GCTCTGGAGAAATTTCTACT	221847	gRNA_Non-Targeting_Control_16	CAGGTTTGCACGCATAGCTA	37611
gRNA_USP17L5_2	GCCAGCAGCCAATGCCTGTG	76992	gRNA_USP12_1	CAGCACACCAGACCCAACGT	11660	gRNA_USP17L25_3	GAGGGCTGGATGACGTGGCC	227639	gRNA_JOSD2_2	CTGCCGTTCGTGGTACACGG	157656	gRNA_USP19_2	CAGATACAGACTGTGTGGTG	218576	gRNA_Non-Targeting_Control_14	AAGAATTAGGCACGGTTACT	37294
gRNA_USP19_2	CAGATACAGACTGTGTGGTG	74006	gRNA_USP43_2	AAGTACGGCTCTCAGTTCCA	10422	gRNA_USP4_3	CAGCTGGGACATGTACAATG	226317	gRNA_USP17L5_2	GCCAGCAGCCAATGCCTGTG	156877	gRNA_Non-Targeting_Control_22	ATCGTTGCTGACAGGATCTA	211412	gRNA_USP34_3	TTGTATCTTTGGGTGCACCA	36978
gRNA_USP15_1	CCAAGTTACTTAGGCCACAG	73402	gRNA_USP17L15_3	GACAGAAGTGATGCTAGAGG	3218	gRNA_Non-Targeting_Control_7	TTGTACGGTACTGGCTTTGT	222187	gRNA_USP19_2	CAGATACAGACTGTGTGGTG	150683	gRNA_USP27X_3	CGGGACTCGGCATCTCACAT	210281	gRNA_BRCC3_2	AGTAATGGGGCTGTGCATAG	36727
gRNA_USP49_1	CACCAAACAGGTCTTAAAGG	72317	gRNA_USP35_1	AGAACTCGGCGAAGACGTCG	5361	gRNA_USP12_3	CTTGTGATGAACTTCTTAGG	210360	gRNA_USP15_1	CCAAGTTACTTAGGCCACAG	148504	gRNA_USP4_3	CAGCTGGGACATGTACAATG	205299	gRNA_USP27X_3	CGGGACTCGGCATCTCACAT	35692
gRNA_JOSD2_2	CTGCCGTTCGTGGTACACGG	71917	gRNA_USP11_2	TGATAGGCAGTGGAACACTG	8155	gRNA_USP34_1	GTCTTGTATCACACGAACTG	209399	gRNA_USP49_1	CACCAAACAGGTCTTAAAGG	144662	gRNA_USP32_3	CTGTAGTATTCACGTAACTG	204275	gRNA_Non-Targeting_Control_11	GAACTGGCAAACAGGCGTGG	34337
gRNA_TNFAIP3_1	CCACTTGTTAACAGAGACCG	70096	gRNA_CYLD_2	ATATTCAAGATCGTTCTGTG	8480	gRNA_USP17L13_2	CTGTGATGATTTGGTTCCTG	204624	gRNA_MPND_2	CTGACACGGAGTGAGGTCGT	142072	gRNA_USP15_1	CCAAGTTACTTAGGCCACAG	201403	gRNA_USP18_2	ATGACCATGAGGGTAGTCCC	30646
gRNA_FAM188A_3	CCATATACAGGATCTATCAA	68765	gRNA_YOD1_1	GCGGAGCCGCCACATCGTGT	5346	gRNA_USP14_1	TACAGGATGCTAATGAATGT	203402	gRNA_PAN2_3	CTGTGAAAAGTACCAGCCCA	141661	gRNA_Non-Targeting_Control_28	GGACGCACCATTCCGGGTGA	197862	gRNA_USP19_2	CAGATACAGACTGTGTGGTG	30546
gRNA_MPND_2	CTGACACGGAGTGAGGTCGT	68618	gRNA_USP17L27_1	AGCCCAGCCCCCACCGCAGC	2150	gRNA_Non-Targeting_Control_6	ATAGCCGCCGCTCATTACTT	193461	gRNA_TNFAIP3_1	CCACTTGTTAACAGAGACCG	140629	gRNA_Non-Targeting_Control_2	CAAACAGTCTAAGGCGACGA	197462	gRNA_USP12_3	CTTGTGATGAACTTCTTAGG	29900
gRNA_PAN2_3	CTGTGAAAAGTACCAGCCCA	68456	gRNA_Non-Targeting_Control_25	CATTAAACCTTGCCCCACAA	13070	gRNA_BRCC3_2	AGTAATGGGGCTGTGCATAG	192658	gRNA_USP47_1	CTTGGCTGGACCCATAAGGT	137773	gRNA_Non-Targeting_Control_11	GAACTGGCAAACAGGCGTGG	196879	gRNA_USP11_3	GTGGGCGAGAACGTCCACTG	29872
gRNA_USP4_3	CAGCTGGGACATGTACAATG	68137	gRNA_USP35_3	CATCCATGAGCTCCAATGGG	12207	gRNA_USP13_2	CTGGAGCATTACAGAGACAT	187021	gRNA_FAM188A_3	CCATATACAGGATCTATCAA	137164	gRNA_USP17L25_3	GAGGGCTGGATGACGTGGCC	195952	gRNA_Non-Targeting_Control_6	ATAGCCGCCGCTCATTACTT	29754
gRNA_USP40_2	CATGGTACAGACGATAGATG	67587	gRNA_USP16_1	AAGGAAAGATTCATGAACCA	4382	gRNA_USP17L8_2	GGAGAGAATGCCTATCCTTG	185118	gRNA_USP4_3	CAGCTGGGACATGTACAATG	136716	gRNA_Non-Targeting_Control_14	AAGAATTAGGCACGGTTACT	194155	gRNA_USP29_1	ACTCACTCAAGGTGTCCCAT	29522
gRNA_USP47_1	CTTGGCTGGACCCATAAGGT	67477	gRNA_USP17L2_2	ACACGGGCCTCAGATGAGAG	10122	gRNA_Non-Targeting_Control_33	CGCTAGGTTATTTCGTGGCC	183434	gRNA_OTUD5_3	CGGCGCAGGCTACAACAGTG	136080	gRNA_USP48_2	CTGGCGCCAACTCCGCAAGG	191636	gRNA_USP15_1	CCAAGTTACTTAGGCCACAG	29470
gRNA_Non-Targeting_Control_16	CAGGTTTGCACGCATAGCTA	66402	gRNA_USP17L5_3	GTGTAAAGTTAACGTCTTGG	2966	gRNA_Non-Targeting_Control_35	CGACAACGTGCAGGTGTATC	180928	gRNA_Non-Targeting_Control_16	CAGGTTTGCACGCATAGCTA	135961	gRNA_USP17L1_2	GCAGGTAGATCATCACTGCA	189740	gRNA_MPND_2	CTGACACGGAGTGAGGTCGT	28836
gRNA_PAN2_2	CTCAAGTATATGGCCCGTGG	66157	gRNA_USP32_1	GAATGCACATGACACCACAA	4177	gRNA_USP15_1	CCAAGTTACTTAGGCCACAG	168446	gRNA_ATXN3_2	CTGTCATCCATATTTCCAGA	135789	gRNA_Non-Targeting_Control_33	CGCTAGGTTATTTCGTGGCC	187559	gRNA_USP4_3	CAGCTGGGACATGTACAATG	28228
gRNA_USP17L4_3	GCTGGGTGGAGTTGTCACGA	66058	gRNA_Non-Targeting_Control_6	ATAGCCGCCGCTCATTACTT	19010	gRNA_USP50_2	AGGGAGCATTCATATTTGGA	160484	gRNA_PAN2_2	CTCAAGTATATGGCCCGTGG	135402	gRNA_MPND_2	CTGACACGGAGTGAGGTCGT	183923	gRNA_ATXN3_3	CGAGTGTTAGAAGCAAATGA	28106
gRNA_USP17L5_1	TAGACGAGAGGTCCTGTGTT	65972	gRNA_OTUD7B_2	TAGGAGGCCCATAGTCGTCG	11601	gRNA_OTUD6A_2	CCAAGACGTGGCCCGCATGG	160313	gRNA_USP17L5_1	TAGACGAGAGGTCCTGTGTT	132536	gRNA_USP28_1	AAAATGTTGGCAATACATGT	178116	gRNA_Non-Targeting_Control_28	GGACGCACCATTCCGGGTGA	28072
gRNA_OTUD5_3	CGGCGCAGGCTACAACAGTG	65722	gRNA_USP8_2	GTATTTCATATATAGTACAT	2201	gRNA_USP46_1	GTTCATATACCTTAGACAGT	159540	gRNA_USP17L8_1	GTACAGAGCATGCAGCACTT	131859	gRNA_FAM188B3_2	TGGTTGCCTTCATGATTCTG	175671	gRNA_USP17L1_2	GCAGGTAGATCATCACTGCA	27236
gRNA_USP14_1	TACAGGATGCTAATGAATGT	65147	gRNA_USP33_3	TCATCAAATACGGCAACCAG	4368	gRNA_Non-Targeting_Control_2	CAAACAGTCTAAGGCGACGA	159493	gRNA_USP17L4_3	GCTGGGTGGAGTTGTCACGA	131820	gRNA_USP12_3	CTTGTGATGAACTTCTTAGG	174354	gRNA_USP18_1	AAGATCTGCCGGGGACTGCG	27077
gRNA_USP17L8_1	GTACAGAGCATGCAGCACTT	65068	gRNA_Non-Targeting_Control_17	AGTTCCCAGAAATATATTGC	8068	gRNA_USP11_3	GTGGGCGAGAACGTCCACTG	159454	gRNA_USP40_2	CATGGTACAGACGATAGATG	131586	gRNA_Non-Targeting_Control_29	GGTGCGGTCTGCTTGTAGAT	172901	gRNA_USP14_1	TACAGGATGCTAATGAATGT	26988
gRNA_USP31_1	CAAACCTGAATGCAAACCGT	64658	gRNA_USP33_1	AACAGTCGACTTAAACAACC	3760	gRNA_FAM188A_2	TTGGACCAGTATTCAATGTG	159184	gRNA_USP35_3	CATCCATGAGCTCCAATGGG	131078	gRNA_USP17L7_2	CAAAGGTGTCTGAAACGCCG	169557	gRNA_OTUD6A_2	CCAAGACGTGGCCCGCATGG	26615
gRNA_ATXN3_2	CTGTCATCCATATTTCCAGA	64600	gRNA_TNFAIP3_1	CCACTTGTTAACAGAGACCG	13330	gRNA_USP42_3	TCTCATTTATAGGCTAGCAA	158915	gRNA_USP31_1	CAAACCTGAATGCAAACCGT	130357	gRNA_USP29_1	ACTCACTCAAGGTGTCCCAT	169140	gRNA_Non-Targeting_Control_2	CAAACAGTCTAAGGCGACGA	26316
gRNA_USP35_3	CATCCATGAGCTCCAATGGG	64332	gRNA_JOSD2_2	CTGCCGTTCGTGGTACACGG	13670	gRNA_Non-Targeting_Control_29	GGTGCGGTCTGCTTGTAGAT	158012	gRNA_USP14_1	TACAGGATGCTAATGAATGT	127724	gRNA_USP17L13_2	CTGTGATGATTTGGTTCCTG	166816	gRNA_OTUD3_3	GCTCTTGGTGATCAATTGGA	25866
gRNA_USP12_1	CAGCACACCAGACCCAACGT	63159	gRNA_OTUD6B_3	GCGCTAGAAGAAACCTGCAC	4517	gRNA_OTUD3_3	GCTCTTGGTGATCAATTGGA	157830	gRNA_USP12_1	CAGCACACCAGACCCAACGT	126663	gRNA_JOSD2_2	CTGCCGTTCGTGGTACACGG	164864	gRNA_USP17L13_2	CTGTGATGATTTGGTTCCTG	25700
gRNA_USP6_1	CCAACGGACCTGGATATAGG	61147	gRNA_ATXN3_1	TCAACAGTCCAGAGTATCAG	9333	gRNA_Non-Targeting_Control_19	TGCCGTTAGCATGCGATCCC	156061	gRNA_USP13_3	GCCAGGACTAAGTTAGGACA	123990	gRNA_Non-Targeting_Control_12	CACTGCAGTATTCGTGGCCT	162206	gRNA_USP50_1	CCTATCTGATGACAGACATG	25305
gRNA_USP17L30_2	CGTGGACCAGCACAGCATAG	60952	gRNA_JOSD2_3	AGGATCAGCCCCAGTACCTG	5052	gRNA_Non-Targeting_Control_10	TCGCGCTTGGGTTATACGCT	154839	gRNA_USP6_1	CCAACGGACCTGGATATAGG	123196	gRNA_OTUD6A_2	CCAAGACGTGGCCCGCATGG	160114	gRNA_USP40_2	CATGGTACAGACGATAGATG	24948
gRNA_USP38_1	GCTGATTATGAGCTGTCCGT	60400	gRNA_USP45_2	GACGTGACTCAGAATTCATG	7551	gRNA_USP46_3	TGTATGCCAACACATTCTCC	154666	gRNA_USP48_2	CTGGCGCCAACTCCGCAAGG	120916	gRNA_Non-Targeting_Control_10	TCGCGCTTGGGTTATACGCT	159653	gRNA_USP17L8_2	GGAGAGAATGCCTATCCTTG	24913
gRNA_OTUB1_2	CAGACACAGCCTTGAACCTG	60163	gRNA_JOSD1_1	TCTACCATGAGAAACAGCGC	5748	gRNA_ATXN3L_2	ATCGAGCCAAGAAATTTGCA	154465	gRNA_OTUB1_2	CAGACACAGCCTTGAACCTG	120803	gRNA_USP22_2	GCCATTGATCTGATGTACGG	159348	gRNA_JOSD2_2	CTGCCGTTCGTGGTACACGG	24904
gRNA_USP13_3	GCCAGGACTAAGTTAGGACA	59813	gRNA_USP6_2	TATACTCCGAATAGGCCAGG	7886	gRNA_USP48_2	CTGGCGCCAACTCCGCAAGG	153692	gRNA_USP38_1	GCTGATTATGAGCTGTCCGT	120796	gRNA_OTUB2_1	AGTGCCGGAAGAAGTCTGCT	159169	gRNA_USP14_3	TCATGTAACAAGTGTTACCA	24846
gRNA_USP47_3	CCATAAATGAGAGTCTGCAA	59450	gRNA_USP51_1	CACAGACCAGACACAAGCTG	7405	gRNA_Non-Targeting_Control_23	TTATGTGAGCACGCCATTAC	153266	gRNA_USP17L18_1	GAGGACGACTCACTCTACTT	120606	gRNA_USP18_2	ATGACCATGAGGGTAGTCCC	156783	gRNA_Non-Targeting_Control_12	CACTGCAGTATTCGTGGCCT	24314
gRNA_USP49_3	CGTGCTCAATGATAACCCAG	59015	gRNA_OTUD7B_3	TAGTGTAATTCTGTCCCTAG	7483	gRNA_UCHL1_3	CGCCCTACCTGGGCCGTGAG	152238	gRNA_USP17L30_2	CGTGGACCAGCACAGCATAG	120234	gRNA_USP13_1	CCTGAAAAGACATGTGCGAG	156275	gRNA_USP17L8_1	GTACAGAGCATGCAGCACTT	23845
gRNA_USP17L18_2	CCTTGTTCCAGTCGACATGG	58957	gRNA_FAM63A_1	AGTCATCCCTGAAAACCATG	2590	gRNA_USP13_1	CCTGAAAAGACATGTGCGAG	151167	gRNA_USP43_1	CACACCACTGACCTGTACAG	118282	gRNA_USP14_1	TACAGGATGCTAATGAATGT	154121	gRNA_Non-Targeting_Control_9	GTCCTCATCCGGTCAGGCTG	23721
gRNA_USP17L18_1	GAGGACGACTCACTCTACTT	58899	gRNA_USP1_3	GAAGTTAAACCCATAAACAA	935	gRNA_USP19_2	CAGATACAGACTGTGTGGTG	149772	gRNA_COPS6_2	CAAGGAATATTATTACACCA	117172	gRNA_PAN2_3	CTGTGAAAAGTACCAGCCCA	152071	gRNA_OTUD7B_2	TAGGAGGCCCATAGTCGTCG	23464
gRNA_USP43_1	CACACCACTGACCTGTACAG	58192	gRNA_USP9X_3	TCATGGCGATAAAACACATG	5006	gRNA_Non-Targeting_Control_28	GGACGCACCATTCCGGGTGA	149640	gRNA_USP49_3	CGTGCTCAATGATAACCCAG	117098	gRNA_USP17L7_1	ACACGTTTGAGAGTCCTCCC	151876	gRNA_USP17L5_1	TAGACGAGAGGTCCTGTGTT	23291
gRNA_COPS6_2	CAAGGAATATTATTACACCA	58067	gRNA_USP14_3	TCATGTAACAAGTGTTACCA	9552	gRNA_FAM188B_3	ATACGGCATAGTGCAGAACA	149582	gRNA_USP17L20_3	CGTCCAACTCGGGGGCCTGG	117038	gRNA_OTUD3_3	GCTCTTGGTGATCAATTGGA	150283	gRNA_USP13_1	CCTGAAAAGACATGTGCGAG	23224
gRNA_USP17L8_2	GGAGAGAATGCCTATCCTTG	57989	gRNA_JOSD1_2	TGAAGCCCATGACGTTAGTG	8150	gRNA_USP29_3	TGGTTCAACGGGTAGAACCA	149158	gRNA_USP17L18_2	CCTTGTTCCAGTCGACATGG	116809	gRNA_BRCC3_2	AGTAATGGGGCTGTGCATAG	150194	gRNA_USP17L25_3	GAGGGCTGGATGACGTGGCC	23164
gRNA_USP48_2	CTGGCGCCAACTCCGCAAGG	57368	gRNA_VCPIP1_2	CAGTCTGATGCAATATAGTG	5909	gRNA_USP17L7_2	CAAAGGTGTCTGAAACGCCG	146610	gRNA_USP47_3	CCATAAATGAGAGTCTGCAA	115718	gRNA_UCHL1_3	CGCCCTACCTGGGCCGTGAG	148813	gRNA_USP48_2	CTGGCGCCAACTCCGCAAGG	23164
gRNA_Non-Targeting_Control_12	CACTGCAGTATTCGTGGCCT	56676	gRNA_Non-Targeting_Control_20	CGGAGTTAACCTGGAACCTT	30554	gRNA_USP6_1	CCAACGGACCTGGATATAGG	144983	gRNA_USP50_1	CCTATCTGATGACAGACATG	113297	gRNA_USP34_3	TTGTATCTTTGGGTGCACCA	148264	gRNA_Non-Targeting_Control_22	ATCGTTGCTGACAGGATCTA	22911
gRNA_COPS6_3	TGGGTTGGTATACCACAGGG	56634	gRNA_USP17L20_2	CCAAGTGCTCGTCCAACTCG	4994	gRNA_OTUD7B_2	TAGGAGGCCCATAGTCGTCG	143151	gRNA_USP22_1	CCTCGAACTGCACCATAGGT	112476	gRNA_Non-Targeting_Control_26	CTATATTGTCGCGCAGTGGA	147269	gRNA_USP4_1	GAAATGGCAACTCAGCACAT	22664
gRNA_USP22_1	CCTCGAACTGCACCATAGGT	56263	gRNA_USP17L11_1	TGCCAACTACATGCTGTCCC	1365	gRNA_USP32_3	CTGTAGTATTCACGTAACTG	142564	gRNA_ZC3H12A_3	CAGGACGCTGTGGATCTCCG	112209	gRNA_USP13_3	GCCAGGACTAAGTTAGGACA	146538	gRNA_BAP1_3	CACGGACGTATCATCCACCA	22078
gRNA_USP50_1	CCTATCTGATGACAGACATG	55615	gRNA_Non-Targeting_Control_5	TTAACTCGAACGCTCGAAAG	4821	gRNA_MPND_2	CTGACACGGAGTGAGGTCGT	141467	gRNA_USP29_1	ACTCACTCAAGGTGTCCCAT	112182	gRNA_USP35_3	CATCCATGAGCTCCAATGGG	143320	gRNA_USP6_1	CCAACGGACCTGGATATAGG	21908
gRNA_OTUD6A_2	CCAAGACGTGGCCCGCATGG	55083	gRNA_USP17L19_1	ACACGTTTGAGAGTGCTCCC	4146	gRNA_USP17L8_1	GTACAGAGCATGCAGCACTT	139258	gRNA_USP17L8_2	GGAGAGAATGCCTATCCTTG	111779	gRNA_USP17L10_1	TCTCAGGGAGAGAAGTACGC	143003	gRNA_USP17L7_2	CAAAGGTGTCTGAAACGCCG	21850
gRNA_USP29_1	ACTCACTCAAGGTGTCCCAT	54853	gRNA_OTUD6A_1	TGCGCCGCCACCAACGCGAG	3549	gRNA_USP17L1_2	GCAGGTAGATCATCACTGCA	138857	gRNA_Non-Targeting_Control_12	CACTGCAGTATTCGTGGCCT	110767	gRNA_USP9Y_3	TGATGGTCCCAATCTAGAGG	142072	gRNA_USP14_2	GCCTGCCAGACAGAAAGTTA	21834
gRNA_USP17L20_3	CGTCCAACTCGGGGGCCTGG	54816	gRNA_PSMD14_2	AGCCTTGTCGGAGAGAGCTG	2357	gRNA_USP40_2	CATGGTACAGACGATAGATG	138649	gRNA_USP20_2	CTCACCCTTTAACTCATCAG	110756	gRNA_UCHL5_1	TTTATTATTTCAGGTTGCCG	140477	gRNA_USP22_2	GCCATTGATCTGATGTACGG	21813
gRNA_USP17L29_2	TGACGTGGCCAGGATTGTGG	54231	gRNA_USP27X_1	TAAACCGATCGTAAAGCTGG	6770	gRNA_USP12_2	TTGCGTATAAGAGTCAACCT	138124	gRNA_COPS6_3	TGGGTTGGTATACCACAGGG	110529	gRNA_ZRANB1_2	CAGCAAGCGTACTTCATCTG	139591	gRNA_USP34_1	GTCTTGTATCACACGAACTG	21412
gRNA_USP48_3	CAGACACGTAAACCCAAGTG	53855	gRNA_FAM63B_1	TAGCTGCGAGTTCAATAGTG	9417	gRNA_Non-Targeting_Control_30	GTTCCCCGGGAAGTCTATGC	137637	gRNA_USP48_3	CAGACACGTAAACCCAAGTG	110229	gRNA_Non-Targeting_Control_25	CATTAAACCTTGCCCCACAA	139496	gRNA_Non-Targeting_Control_33	CGCTAGGTTATTTCGTGGCC	21316
gRNA_Non-Targeting_Control_2	CAAACAGTCTAAGGCGACGA	53789	gRNA_USP17L26_1	TAGCAGGAGACCTGCTGCGG	1154	gRNA_Non-Targeting_Control_24	GTGCGTGAGTATTAACGCTC	136540	gRNA_USP17L29_2	TGACGTGGCCAGGATTGTGG	110054	gRNA_USP18_1	AAGATCTGCCGGGGACTGCG	139137	gRNA_Non-Targeting_Control_29	GGTGCGGTCTGCTTGTAGAT	21185
gRNA_USP17L28_2	ACACGGGTCTCACATGAGAG	53762	gRNA_USP17L29_2	TGACGTGGCCAGGATTGTGG	4053	gRNA_USP13_3	GCCAGGACTAAGTTAGGACA	134146	gRNA_Non-Targeting_Control_6	ATAGCCGCCGCTCATTACTT	109086	gRNA_TNFAIP3_1	CCACTTGTTAACAGAGACCG	138943	gRNA_PAN2_3	CTGTGAAAAGTACCAGCCCA	20576
gRNA_STAMBPL1_1	CCAGACCTAAAGTAACGTCG	53725	gRNA_USP49_2	GGCGGCGCGAGGTGAAACGG	5569	gRNA_Non-Targeting_Control_36	TGTGAAAGTTTATGGTGTTA	133062	gRNA_USP20_3	CCTTTCTTGAGCACGTACGA	108774	gRNA_USP11_3	GTGGGCGAGAACGTCCACTG	135737	gRNA_Non-Targeting_Control_15	TAGACAACCGCGGAGAATGC	20523
gRNA_USP18_2	ATGACCATGAGGGTAGTCCC	53290	gRNA_USP17L3_1	AACTTTACACACTTCTGCCA	3653	gRNA_FAM188B3_2	TGGTTGCCTTCATGATTCTG	132288	gRNA_OTUD6A_2	CCAAGACGTGGCCCGCATGG	108048	gRNA_ATXN3_3	CGAGTGTTAGAAGCAAATGA	135424	gRNA_ATXN3L_2	ATCGAGCCAAGAAATTTGCA	20416
gRNA_USP25_1	TGTGATGGTATGGAACCACT	52921	gRNA_USP17L15_2	ACATGTATAGCTTCATGTCA	6257	gRNA_USP11_2	TGATAGGCAGTGGAACACTG	130038	gRNA_Non-Targeting_Control_2	CAAACAGTCTAAGGCGACGA	107525	gRNA_BAP1_3	CACGGACGTATCATCCACCA	134708	gRNA_FAM188B3_2	TGGTTGCCTTCATGATTCTG	20292
gRNA_USP20_3	CCTTTCTTGAGCACGTACGA	52707	gRNA_PAN2_3	CTGTGAAAAGTACCAGCCCA	14838	gRNA_USP29_1	ACTCACTCAAGGTGTCCCAT	129704	gRNA_OTUD7B_2	TAGGAGGCCCATAGTCGTCG	106822	gRNA_USP17L17_1	AATCTTGTTGCCTGTCACAT	132558	gRNA_USP46_1	GTTCATATACCTTAGACAGT	20206
gRNA_USP20_2	CTCACCCTTTAACTCATCAG	52598	gRNA_ZRANB1_3	GAGTCCCGCTTCGTAGCAGG	3069	gRNA_PAN2_3	CTGTGAAAAGTACCAGCCCA	128820	gRNA_USP3_1	CCCATTCCTTAACTCCACGG	106742	gRNA_USP14_3	TCATGTAACAAGTGTTACCA	132435	gRNA_OTUB2_1	AGTGCCGGAAGAAGTCTGCT	19972
gRNA_Non-Targeting_Control_11	GAACTGGCAAACAGGCGTGG	52151	gRNA_Non-Targeting_Control_18	CCAAAAAGATGAATATCTCG	7459	gRNA_ZRANB1_2	CAGCAAGCGTACTTCATCTG	125779	gRNA_OTUD1_3	CTCCGCCGCACTACTCGGGG	106511	gRNA_OTUB1_1	GCAGGACCGAATTCAGCAAG	132375	gRNA_USP47_1	CTTGGCTGGACCCATAAGGT	19885
gRNA_USP3_1	CCCATTCCTTAACTCCACGG	52125	gRNA_Non-Targeting_Control_29	GGTGCGGTCTGCTTGTAGAT	16366	gRNA_USP17L1_3	GACATGGCCAGGACTGTGGA	125054	gRNA_STAMBPL1_1	CCAGACCTAAAGTAACGTCG	106461	gRNA_USP17L3_3	GCCAGAAGCCAATGCCTGTG	132021	gRNA_USP35_3	CATCCATGAGCTCCAATGGG	19880
gRNA_Non-Targeting_Control_25	CATTAAACCTTGCCCCACAA	52038	gRNA_COPS6_2	CAAGGAATATTATTACACCA	6253	gRNA_Non-Targeting_Control_12	CACTGCAGTATTCGTGGCCT	123899	gRNA_Non-Targeting_Control_11	GAACTGGCAAACAGGCGTGG	105971	gRNA_Non-Targeting_Control_23	TTATGTGAGCACGCCATTAC	128669	gRNA_USP46_3	TGTATGCCAACACATTCTCC	19878
gRNA_USP17L8_3	ACACGGGTCTCAGATGAGAG	51651	gRNA_USP44_2	TGGTTTGAACAATCACCCAT	9657	gRNA_JOSD2_2	CTGCCGTTCGTGGTACACGG	123441	gRNA_USP18_2	ATGACCATGAGGGTAGTCCC	105194	gRNA_USP40_2	CATGGTACAGACGATAGATG	128654	gRNA_USP43_2	AAGTACGGCTCTCAGTTCCA	19875
gRNA_OTUD7B_2	TAGGAGGCCCATAGTCGTCG	51321	gRNA_COPS5_1	AGCAGCCTGAGCATTTACTC	3836	gRNA_USP25_1	TGTGATGGTATGGAACCACT	123396	gRNA_USP17L28_2	ACACGGGTCTCACATGAGAG	104752	gRNA_TNFAIP3_3	CTTGTGGCGCTGAAAACGAA	128481	gRNA_UCHL1_3	CGCCCTACCTGGGCCGTGAG	19830
gRNA_Non-Targeting_Control_6	ATAGCCGCCGCTCATTACTT	51080	gRNA_STAMBP_3	CCAGAGCGGAAGTACCGACG	5800	gRNA_USP21_3	GAGAAGGGACTTCCGGCAAG	122508	gRNA_USP25_1	TGTGATGGTATGGAACCACT	104748	gRNA_USP6_1	CCAACGGACCTGGATATAGG	126809	gRNA_STAMBP_1	AATCGATGGATTGCGCCATG	19723
gRNA_OTUD1_3	CTCCGCCGCACTACTCGGGG	50575	gRNA_USP17L10_3	GGTCTCCTGCTACTCAGAGG	5239	gRNA_USP17L7_1	ACACGTTTGAGAGTCCTCCC	120955	gRNA_Non-Targeting_Control_25	CATTAAACCTTGCCCCACAA	102441	gRNA_USP48_3	CAGACACGTAAACCCAAGTG	126611	gRNA_Non-Targeting_Control_23	TTATGTGAGCACGCCATTAC	19526
gRNA_USP13_1	CCTGAAAAGACATGTGCGAG	50536	gRNA_USP42_2	GGACGCAAAGGGGATGATCG	10196	gRNA_USP18_2	ATGACCATGAGGGTAGTCCC	117737	gRNA_USP17L19_3	CCTGTGAGGGCTGGATGACG	102360	gRNA_FAM188B_3	ATACGGCATAGTGCAGAACA	125728	gRNA_Non-Targeting_Control_10	TCGCGCTTGGGTTATACGCT	19428
gRNA_USP44_2	TGGTTTGAACAATCACCCAT	50271	gRNA_YOD1_3	GAGGATTCGCTGACCGCCGG	4377	gRNA_ATXN3_3	CGAGTGTTAGAAGCAAATGA	117212	gRNA_USP17L8_3	ACACGGGTCTCAGATGAGAG	102150	gRNA_Non-Targeting_Control_9	GTCCTCATCCGGTCAGGCTG	125106	gRNA_USP12_1	CAGCACACCAGACCCAACGT	19268
gRNA_USP17L19_3	CCTGTGAGGGCTGGATGACG	49780	gRNA_USP28_3	CTGAAGAGGATACTGGCCGA	46889	gRNA_Non-Targeting_Control_9	GTCCTCATCCGGTCAGGCTG	115450	gRNA_USP21_2	AGGACCGGGCGGATATCATG	102029	gRNA_Non-Targeting_Control_19	TGCCGTTAGCATGCGATCCC	124607	gRNA_USP17L2_2	ACACGGGCCTCAGATGAGAG	19062
gRNA_USP21_2	AGGACCGGGCGGATATCATG	49718	gRNA_TNFAIP3_2	TATGCCATGAGTGCTCAGAG	7903	gRNA_USP44_2	TGGTTTGAACAATCACCCAT	114802	gRNA_BRCC3_3	GCTCTGGAGAAATTTCTACT	101359	gRNA_USP17L3_2	CTACCTGCTTGTGGCCGGGA	123712	gRNA_Non-Targeting_Control_35	CGACAACGTGCAGGTGTATC	19012
gRNA_Non-Targeting_Control_33	CGCTAGGTTATTTCGTGGCC	49689	gRNA_USP28_2	AGAAGTGGAAGCCCTATCTG	14724	gRNA_USP34_2	TCATATACCACGATTAACAG	114723	gRNA_USP17L1_2	GCAGGTAGATCATCACTGCA	100760	gRNA_OTUD7A_1	TATGGGCTAGGACAAAAACG	123364	gRNA_USP17L1_3	GACATGGCCAGGACTGTGGA	18875
gRNA_USP54_1	ACTGACCACAGACTCATGGT	49417	gRNA_USP49_1	CACCAAACAGGTCTTAAAGG	9590	gRNA_Non-Targeting_Control_15	TAGACAACCGCGGAGAATGC	113941	gRNA_USP50_2	AGGGAGCATTCATATTTGGA	100418	gRNA_Non-Targeting_Control_15	TAGACAACCGCGGAGAATGC	122727	gRNA_USP45_2	GACGTGACTCAGAATTCATG	18765
gRNA_USP17L2_2	ACACGGGCCTCAGATGAGAG	49404	gRNA_USP1_1	GGCGACTGCTTAACACACTG	3760	gRNA_USP50_1	CCTATCTGATGACAGACATG	113883	gRNA_USP44_2	TGGTTTGAACAATCACCCAT	100404	gRNA_USP50_2	AGGGAGCATTCATATTTGGA	122470	gRNA_USP48_3	CAGACACGTAAACCCAAGTG	18703
gRNA_OTUD3_3	GCTCTTGGTGATCAATTGGA	49233	gRNA_USP7_1	AGATGTATGATCCCAAAACG	2869	gRNA_Non-Targeting_Control_14	AAGAATTAGGCACGGTTACT	111538	gRNA_Non-Targeting_Control_33	CGCTAGGTTATTTCGTGGCC	100306	gRNA_Non-Targeting_Control_30	GTTCCCCGGGAAGTCTATGC	121497	gRNA_USP17L2_1	TGACATGACCAGGACTGTGG	18702
gRNA_USP22_2	GCCATTGATCTGATGTACGG	48950	gRNA_USP11_1	GGTCTCCATGATGATCAACT	6945	gRNA_Non-Targeting_Control_25	CATTAAACCTTGCCCCACAA	111391	gRNA_USP17L27_3	TTGCCAACTACATGCTGTCC	99747	gRNA_STAMBP_1	AATCGATGGATTGCGCCATG	119392	gRNA_USP9Y_2	TGGTACAGACCCCATAACAC	18533
gRNA_BRCC3_3	GCTCTGGAGAAATTTCTACT	48928	gRNA_Non-Targeting_Control_27	TAAAGCAGAAGAATATACAG	4483	gRNA_PAN2_2	CTCAAGTATATGGCCCGTGG	110783	gRNA_USP2_1	GCTGAGACCCGACATCACTG	99145	gRNA_ATXN3L_2	ATCGAGCCAAGAAATTTGCA	119238	gRNA_USP2_2	ATAGCTACCGGATAGACCCC	18476
gRNA_ZC3H12A_3	CAGGACGCTGTGGATCTCCG	48720	gRNA_STAMBPL1_1	CCAGACCTAAAGTAACGTCG	8225	gRNA_USP17L10_1	TCTCAGGGAGAGAAGTACGC	110601	gRNA_USP22_2	GCCATTGATCTGATGTACGG	98534	gRNA_USP43_2	AAGTACGGCTCTCAGTTCCA	118591	gRNA_USP50_2	AGGGAGCATTCATATTTGGA	18366
gRNA_USP50_2	AGGGAGCATTCATATTTGGA	48626	gRNA_USP20_2	CTCACCCTTTAACTCATCAG	8018	gRNA_OTULIN_1	ACCACGGACTCGCCGTATGG	110258	gRNA_UCHL1_3	CGCCCTACCTGGGCCGTGAG	97346	gRNA_USP21_3	GAGAAGGGACTTCCGGCAAG	118533	gRNA_USP17L17_1	AATCTTGTTGCCTGTCACAT	18334
gRNA_ZRANB1_2	CAGCAAGCGTACTTCATCTG	48276	gRNA_USP25_3	GAGACTGAAAGATTACCTCA	3374	gRNA_JOSD1_2	TGAAGCCCATGACGTTAGTG	109099	gRNA_USP17L7_1	ACACGTTTGAGAGTCCTCCC	97101	gRNA_Non-Targeting_Control_36	TGTGAAAGTTTATGGTGTTA	118378	gRNA_Non-Targeting_Control_13	AAGCCATTGTATAACTCCAG	18315
gRNA_Non-Targeting_Control_22	ATCGTTGCTGACAGGATCTA	48105	gRNA_USP36_3	GATCTGGAATCACACTCGGG	3344	gRNA_USP12_1	CAGCACACCAGACCCAACGT	108930	gRNA_OTUB1_1	GCAGGACCGAATTCAGCAAG	96475	gRNA_OTUD7B_2	TAGGAGGCCCATAGTCGTCG	118242	gRNA_FAM188B_3	ATACGGCATAGTGCAGAACA	18105
gRNA_USP17L27_3	TTGCCAACTACATGCTGTCC	48090	gRNA_USP11_3	GTGGGCGAGAACGTCCACTG	11504	gRNA_Non-Targeting_Control_32	GAGTCGAAGATGGTCTAGGA	107237	gRNA_Non-Targeting_Control_28	GGACGCACCATTCCGGGTGA	96033	gRNA_Non-Targeting_Control_35	CGACAACGTGCAGGTGTATC	117090	gRNA_USP49_1	CACCAAACAGGTCTTAAAGG	17949
gRNA_UCHL1_3	CGCCCTACCTGGGCCGTGAG	48014	gRNA_OTUD4_1	TCTTCAATACAGGAATGGGT	4044	gRNA_FAM63B_1	TAGCTGCGAGTTCAATAGTG	106981	gRNA_ATXN3_3	CGAGTGTTAGAAGCAAATGA	95912	gRNA_USP17L8_1	GTACAGAGCATGCAGCACTT	116802	gRNA_USP17L10_1	TCTCAGGGAGAGAAGTACGC	17943
gRNA_OTUB1_1	GCAGGACCGAATTCAGCAAG	47860	gRNA_USP17L4_1	AGTGTGTAAAGTTAACGTGT	6189	gRNA_USP9Y_3	TGATGGTCCCAATCTAGAGG	105609	gRNA_USP13_1	CCTGAAAAGACATGTGCGAG	95907	gRNA_USP50_1	CCTATCTGATGACAGACATG	114623	gRNA_USP31_1	CAAACCTGAATGCAAACCGT	17918
gRNA_USP2_1	GCTGAGACCCGACATCACTG	47538	gRNA_Non-Targeting_Control_22	ATCGTTGCTGACAGGATCTA	17990	gRNA_USP14_2	GCCTGCCAGACAGAAAGTTA	105346	gRNA_OTUD3_3	GCTCTTGGTGATCAATTGGA	95540	gRNA_USP9Y_2	TGGTACAGACCCCATAACAC	112584	gRNA_Non-Targeting_Control_19	TGCCGTTAGCATGCGATCCC	17890
gRNA_ATXN3_3	CGAGTGTTAGAAGCAAATGA	47066	gRNA_OTUD1_1	GCTCTTCGCCCCACGGACCG	8742	gRNA_OTUD1_2	GCGGTGGACGTGTAGTGCGG	105166	gRNA_USP42_2	GGACGCAAAGGGGATGATCG	95477	gRNA_Non-Targeting_Control_13	AAGCCATTGTATAACTCCAG	111963	gRNA_CYLD_2	ATATTCAAGATCGTTCTGTG	17593
gRNA_USP12_2	TTGCGTATAAGAGTCAACCT	46868	gRNA_USP18_2	ATGACCATGAGGGTAGTCCC	11233	gRNA_USP18_1	AAGATCTGCCGGGGACTGCG	102892	gRNA_USP54_1	ACTGACCACAGACTCATGGT	94754	gRNA_USP17L5_1	TAGACGAGAGGTCCTGTGTT	111639	gRNA_OTUD7A_1	TATGGGCTAGGACAAAAACG	17574
gRNA_USP17L7_1	ACACGTTTGAGAGTCCTCCC	46688	gRNA_USP17L7_1	ACACGTTTGAGAGTCCTCCC	12856	gRNA_Non-Targeting_Control_17	AGTTCCCAGAAATATATTGC	102415	gRNA_USP17L2_2	ACACGGGCCTCAGATGAGAG	94701	gRNA_USP17L2_2	ACACGGGCCTCAGATGAGAG	110390	gRNA_ZRANB1_2	CAGCAAGCGTACTTCATCTG	17363
gRNA_USP17L30_3	CCAGCAGCCAATGCCTGTGA	46654	gRNA_FAM188B_2	AAGTCTGGTCTGATTGTGCG	4382	gRNA_USP43_2	AAGTACGGCTCTCAGTTCCA	102146	gRNA_USP17L30_3	CCAGCAGCCAATGCCTGTGA	93562	gRNA_USP36_1	CAGGTTGGATCGTCAAACGC	110098	gRNA_PAN2_2	CTCAAGTATATGGCCCGTGG	17239
gRNA_USP17L1_2	GCAGGTAGATCATCACTGCA	46496	gRNA_USP34_3	TTGTATCTTTGGGTGCACCA	12728	gRNA_USP35_3	CATCCATGAGCTCCAATGGG	101222	gRNA_USP17L20_1	GATGCTAGAGGCGGTGACCT	93355	gRNA_USP34_1	GTCTTGTATCACACGAACTG	109047	gRNA_Non-Targeting_Control_30	GTTCCCCGGGAAGTCTATGC	17130
gRNA_USP42_2	GGACGCAAAGGGGATGATCG	46123	gRNA_MPND_3	ACAAGAGTCGGAGACCACTG	2851	gRNA_TNFAIP3_1	CCACTTGTTAACAGAGACCG	100483	gRNA_USP12_2	TTGCGTATAAGAGTCAACCT	92137	gRNA_CYLD_2	ATATTCAAGATCGTTCTGTG	106624	gRNA_Non-Targeting_Control_26	CTATATTGTCGCGCAGTGGA	17064
gRNA_Non-Targeting_Control_28	GGACGCACCATTCCGGGTGA	46043	gRNA_USP17L18_2	CCTTGTTCCAGTCGACATGG	5009	gRNA_Non-Targeting_Control_26	CTATATTGTCGCGCAGTGGA	98585	gRNA_TNFAIP3_3	CTTGTGGCGCTGAAAACGAA	92088	gRNA_Non-Targeting_Control_34	GTTGATCGAAAATGGGAGAA	104817	gRNA_USP49_2	GGCGGCGCGAGGTGAAACGG	17024
gRNA_USP33_2	ATAGTCAAAGCAGGATCATG	45365	gRNA_OTUD7A_1	TATGGGCTAGGACAAAAACG	7800	gRNA_ATXN3_1	TCAACAGTCCAGAGTATCAG	98507	gRNA_Non-Targeting_Control_22	ATCGTTGCTGACAGGATCTA	91767	gRNA_USP26_2	ATAGTGACGGTTACACAAAG	104784	gRNA_USP13_3	GCCAGGACTAAGTTAGGACA	16954
gRNA_Non-Targeting_Control_18	CCAAAAAGATGAATATCTCG	45263	gRNA_USP17L1_1	TCAAAGCTCAAGAAGTCCAG	5037	gRNA_USP47_3	CCATAAATGAGAGTCTGCAA	97098	gRNA_ZRANB1_2	CAGCAAGCGTACTTCATCTG	91667	gRNA_OTUD1_1	GCTCTTCGCCCCACGGACCG	104290	gRNA_USP21_3	GAGAAGGGACTTCCGGCAAG	16687
gRNA_USP17L25_3	GAGGGCTGGATGACGTGGCC	45047	gRNA_ZC3H12A_1	CAGCTCCCTCTAGTCCCGCG	5698	gRNA_USP17L5_1	TAGACGAGAGGTCCTGTGTT	97094	gRNA_USP17L25_3	GAGGGCTGGATGACGTGGCC	91651	gRNA_USP26_1	GGACAGAGTTCATCAAAACG	103859	gRNA_STAMBP_2	AAGGCCAGCTAAGCCACCTG	16619
gRNA_VCPIP1_2	CAGTCTGATGCAATATAGTG	44881	gRNA_USP17L5_1	TAGACGAGAGGTCCTGTGTT	12375	gRNA_USP42_2	GGACGCAAAGGGGATGATCG	96850	gRNA_USP9X_2	ACAAGTGCTATATCTAACAG	91584	gRNA_Non-Targeting_Control_18	CCAAAAAGATGAATATCTCG	103371	gRNA_ATXN3_1	TCAACAGTCCAGAGTATCAG	16611
gRNA_USP17L28_3	GCATAGAGGACATAGACGAG	44609	gRNA_USP17L28_2	ACACGGGTCTCACATGAGAG	5454	gRNA_USP17L2_2	ACACGGGCCTCAGATGAGAG	95467	gRNA_USP22_3	TGGGGCTCTGCATCTCACAG	91563	gRNA_USP49_1	CACCAAACAGGTCTTAAAGG	103208	gRNA_USP17L3_2	CTACCTGCTTGTGGCCGGGA	16597
gRNA_USP9X_2	ACAAGTGCTATATCTAACAG	44206	gRNA_USP7_3	GGCAGTAGAACAGCTCGATG	2134	gRNA_OTUD6B_2	TGCTTGAGAATCAGCCACCT	95442	gRNA_USP11_1	GGTCTCCATGATGATCAACT	90816	gRNA_OTULIN_1	ACCACGGACTCGCCGTATGG	103168	gRNA_USP30_2	TGTGTGTGACAACTGTACAA	16591
gRNA_USP17L20_1	GATGCTAGAGGCGGTGACCT	43953	gRNA_USP17L8_1	GTACAGAGCATGCAGCACTT	10687	gRNA_OTUD1_1	GCTCTTCGCCCCACGGACCG	94286	gRNA_USP17L28_3	GCATAGAGGACATAGACGAG	89836	gRNA_USP27X_2	ACTGCTTGCGGAGGTTTACG	103028	gRNA_USP17L3_3	GCCAGAAGCCAATGCCTGTG	16502
gRNA_USP17L7_2	CAAAGGTGTCTGAAACGCCG	43409	gRNA_Non-Targeting_Control_16	CAGGTTTGCACGCATAGCTA	23982	gRNA_OTUD6B_3	GCGCTAGAAGAAACCTGCAC	93984	gRNA_MYSM1_1	CAAGCTCAGAAATTACACTG	89229	gRNA_USP30_2	TGTGTGTGACAACTGTACAA	102650	gRNA_Non-Targeting_Control_32	GAGTCGAAGATGGTCTAGGA	16433
gRNA_OTUD6B_2	TGCTTGAGAATCAGCCACCT	43328	gRNA_USP50_2	AGGGAGCATTCATATTTGGA	10136	gRNA_FAM188B4_3	TTATTTCACATAAGTTGCCA	93463	gRNA_Non-Targeting_Control_18	CCAAAAAGATGAATATCTCG	89089	gRNA_PAN2_2	CTCAAGTATATGGCCCGTGG	102505	gRNA_USP17L7_1	ACACGTTTGAGAGTCCTCCC	16190
gRNA_TNFAIP3_3	CTTGTGGCGCTGAAAACGAA	43038	gRNA_Non-Targeting_Control_37	GCGAATGCCTGAAAGTATAA	3004	gRNA_STAMBPL1_3	GTTAAGGCCCTGTTTACAGG	93245	gRNA_OTUD6B_2	TGCTTGAGAATCAGCCACCT	89080	gRNA_USP2_3	TCTGGATGGGCTCCATAACG	101265	gRNA_OTULIN_1	ACCACGGACTCGCCGTATGG	16035
gRNA_USP29_3	TGGTTCAACGGGTAGAACCA	42772	gRNA_Non-Targeting_Control_33	CGCTAGGTTATTTCGTGGCC	15746	gRNA_USP2_3	TCTGGATGGGCTCCATAACG	92397	gRNA_OTULIN_1	ACCACGGACTCGCCGTATGG	89009	gRNA_USP47_1	CTTGGCTGGACCCATAAGGT	100995	gRNA_Non-Targeting_Control_18	CCAAAAAGATGAATATCTCG	16018
gRNA_USP11_1	GGTCTCCATGATGATCAACT	42706	gRNA_Non-Targeting_Control_1	AAAACATCGACCGAAAGCGT	2664525	gRNA_USP9Y_2	TGGTACAGACCCCATAACAC	92210	gRNA_OTUB2_1	AGTGCCGGAAGAAGTCTGCT	89007	gRNA_Non-Targeting_Control_32	GAGTCGAAGATGGTCTAGGA	100757	gRNA_TNFAIP3_1	CCACTTGTTAACAGAGACCG	15950
gRNA_USP17L1_3	GACATGGCCAGGACTGTGGA	42654	gRNA_Non-Targeting_Control_32	GAGTCGAAGATGGTCTAGGA	9997	gRNA_USP22_2	GCCATTGATCTGATGTACGG	91535	gRNA_USP17L7_2	CAAAGGTGTCTGAAACGCCG	88889	gRNA_STAMBP_2	AAGGCCAGCTAAGCCACCTG	99487	gRNA_Non-Targeting_Control_36	TGTGAAAGTTTATGGTGTTA	15847
gRNA_USP22_3	TGGGGCTCTGCATCTCACAG	42618	gRNA_OTUD3_3	GCTCTTGGTGATCAATTGGA	11111	gRNA_USP9Y_1	TAACAATACTCATCGCCTAG	91454	gRNA_USP17L17_3	GCATAGAGGACATAGACAAG	88812	gRNA_USP31_1	CAAACCTGAATGCAAACCGT	99439	gRNA_USP6_3	TCTCCGGAACCTGATTGACG	15706
gRNA_USP19_3	GAGCGAGGCGGGCATAAGTG	42497	gRNA_OTUD6A_2	CCAAGACGTGGCCCGCATGG	14236	gRNA_USP20_2	CTCACCCTTTAACTCATCAG	91429	gRNA_USP1_2	TGGTATTAACAGCATAGAGA	88526	gRNA_OTUD5_3	CGGCGCAGGCTACAACAGTG	98796	gRNA_USP17L5_2	GCCAGCAGCCAATGCCTGTG	15689
gRNA_USP17L21_3	GAGTAACAGGAGACCTGCTG	42432	gRNA_USP15_3	AAGGTGTTCCTTAAGTGACT	1617	gRNA_USP27X_2	ACTGCTTGCGGAGGTTTACG	90286	gRNA_USP17L13_2	CTGTGATGATTTGGTTCCTG	88327	gRNA_FAM63B_3	ACCTTGTACTGCCCTCTCAG	98785	gRNA_USP27X_2	ACTGCTTGCGGAGGTTTACG	15685
gRNA_FAM63B_3	ACCTTGTACTGCCCTCTCAG	42115	gRNA_USP28_1	AAAATGTTGGCAATACATGT	17313	gRNA_STAMBP_2	AAGGCCAGCTAAGCCACCTG	90100	gRNA_USP33_2	ATAGTCAAAGCAGGATCATG	87885	gRNA_FAM188B4_3	TTATTTCACATAAGTTGCCA	98374	gRNA_USP25_1	TGTGATGGTATGGAACCACT	15647
gRNA_USP17L13_2	CTGTGATGATTTGGTTCCTG	42104	gRNA_FAM188B2_1	TCACTTACTATGTTTCAGAG	8281	gRNA_CYLD_1	AAAGGCCTCCAAATAGACGT	89969	gRNA_FAM63B_3	ACCTTGTACTGCCCTCTCAG	87841	gRNA_ATXN3_2	CTGTCATCCATATTTCCAGA	98186	gRNA_USP36_1	CAGGTTGGATCGTCAAACGC	15605
gRNA_Non-Targeting_Control_7	TTGTACGGTACTGGCTTTGT	42071	gRNA_USP39_1	GAACATCAAACGTCCTCCAG	4098	gRNA_ATXN3L_3	TCAGAAAACATGGATGATAC	89726	gRNA_USP17L10_2	TGACATGGCCAGGAATGTGG	87776	gRNA_USP31_3	GACTTATTACCTGATCAGTG	97265	gRNA_OTUD7B_1	AAGCGTTGAAAAGGCGCTGG	15584
gRNA_USP17L10_1	TCTCAGGGAGAGAAGTACGC	42070	gRNA_USP14_1	TACAGGATGCTAATGAATGT	16536	gRNA_USP47_1	CTTGGCTGGACCCATAAGGT	89038	gRNA_USP18_1	AAGATCTGCCGGGGACTGCG	87219	gRNA_FAM188A_3	CCATATACAGGATCTATCAA	97256	gRNA_FAM188A_2	TTGGACCAGTATTCAATGTG	15574
gRNA_OTUB2_1	AGTGCCGGAAGAAGTCTGCT	42062	gRNA_OTUD3_2	GTGACCTACCTGCCACAAAG	3618	gRNA_USP14_3	TCATGTAACAAGTGTTACCA	89018	gRNA_USP11_2	TGATAGGCAGTGGAACACTG	87142	gRNA_Non-Targeting_Control_17	AGTTCCCAGAAATATATTGC	97008	gRNA_UCHL1_2	ACAGGCAGCCCATGATGCCG	15474
gRNA_OTULIN_1	ACCACGGACTCGCCGTATGG	42059	gRNA_OTULIN_3	TGAACTATTCACAAATGAGG	2428	gRNA_USP17L4_1	AGTGTGTAAAGTTAACGTGT	88544	gRNA_USP29_3	TGGTTCAACGGGTAGAACCA	87012	gRNA_USP17L24_3	AGCAGGTATTTCCCATATTC	95553	gRNA_USP17L18_1	GAGGACGACTCACTCTACTT	15329
gRNA_USP11_2	TGATAGGCAGTGGAACACTG	41973	gRNA_USP10_1	ACTGACCAAAATCAGCCCCG	4675	gRNA_USP17L10_2	TGACATGGCCAGGAATGTGG	87942	gRNA_FAM63A_2	AGGTCAAAGACACTGCACTC	85782	gRNA_OTUB1_2	CAGACACAGCCTTGAACCTG	95240	gRNA_FAM63B_3	ACCTTGTACTGCCCTCTCAG	15294
gRNA_MYSM1_1	CAAGCTCAGAAATTACACTG	41784	gRNA_USP19_1	GAGGAATGACTCTTTCATCG	7537	gRNA_USP2_1	GCTGAGACCCGACATCACTG	86720	gRNA_USP27X_2	ACTGCTTGCGGAGGTTTACG	85534	gRNA_USP20_2	CTCACCCTTTAACTCATCAG	95120	gRNA_STAMBPL1_3	GTTAAGGCCCTGTTTACAGG	15168
gRNA_Non-Targeting_Control_29	GGTGCGGTCTGCTTGTAGAT	41685	gRNA_ATXN3L_2	ATCGAGCCAAGAAATTTGCA	13487	gRNA_USP17L17_1	AATCTTGTTGCCTGTCACAT	86078	gRNA_VCPIP1_2	CAGTCTGATGCAATATAGTG	84826	gRNA_USP46_1	GTTCATATACCTTAGACAGT	94990	gRNA_USP35_2	TCAAGGAGGACTCGAACTCG	15120
gRNA_USP1_2	TGGTATTAACAGCATAGAGA	41655	gRNA_OTULIN_1	ACCACGGACTCGCCGTATGG	12327	gRNA_OTUD1_3	CTCCGCCGCACTACTCGGGG	85217	gRNA_USP17L10_1	TCTCAGGGAGAGAAGTACGC	84742	gRNA_USP14_2	GCCTGCCAGACAGAAAGTTA	94879	gRNA_USP46_2	TGGCAACATGAACGAACCTG	14953
gRNA_USP17L10_2	TGACATGGCCAGGAATGTGG	41553	gRNA_USP48_1	TGAGATGCGTAAGCAAAGTG	8026	gRNA_USP17L8_3	ACACGGGTCTCAGATGAGAG	85151	gRNA_USP19_3	GAGCGAGGCGGGCATAAGTG	84699	gRNA_USP26_3	GAAGCCTAAAAGTGAATTTG	94760	gRNA_ATXN3L_3	TCAGAAAACATGGATGATAC	14942
gRNA_Non-Targeting_Control_23	TTATGTGAGCACGCCATTAC	41541	gRNA_Non-Targeting_Control_24	GTGCGTGAGTATTAACGCTC	9721	gRNA_USP17L5_2	GCCAGCAGCCAATGCCTGTG	84997	gRNA_USP17L1_3	GACATGGCCAGGACTGTGGA	84288	gRNA_USP42_3	TCTCATTTATAGGCTAGCAA	94008	gRNA_USP4_2	TCAACAGAGACAACCCTCTG	14924
gRNA_USP17L25_1	AAGAGATTCTCCGATGTCAC	41536	gRNA_USP34_2	TCATATACCACGATTAACAG	7203	gRNA_MPND_1	AGTCTGACCTGGCCAAGTCG	84692	gRNA_USP17L21_3	GAGTAACAGGAGACCTGCTG	84091	gRNA_OTUB1_3	GTAGACCACAAGGTAGTCGG	93904	gRNA_USP6_2	TATACTCCGAATAGGCCAGG	14866
gRNA_USP17L24_2	TCTGAGCTGCCTGGATATCC	41533	gRNA_USP4_3	CAGCTGGGACATGTACAATG	19253	gRNA_Non-Targeting_Control_34	GTTGATCGAAAATGGGAGAA	84263	gRNA_USP14_3	TCATGTAACAAGTGTTACCA	83744	gRNA_USP44_3	TATTGGCCTTCGTTTAACTG	93794	gRNA_OTUD6B_3	GCGCTAGAAGAAACCTGCAC	14862
gRNA_USP17L17_3	GCATAGAGGACATAGACAAG	41434	gRNA_OTUD7A_2	TCTCTGTTCCATGGACACAA	2736	gRNA_USP4_1	GAAATGGCAACTCAGCACAT	84095	gRNA_USP17L24_2	TCTGAGCTGCCTGGATATCC	83645	gRNA_USP25_1	TGTGATGGTATGGAACCACT	93636	gRNA_FAM188A_3	CCATATACAGGATCTATCAA	14835
gRNA_USP18_1	AAGATCTGCCGGGGACTGCG	41371	gRNA_Non-Targeting_Control_26	CTATATTGTCGCGCAGTGGA	11647	gRNA_USP17L3_3	GCCAGAAGCCAATGCCTGTG	83622	gRNA_USP17L13_1	CAGGAACCAAATCATCACAG	82848	gRNA_FAM188A_2	TTGGACCAGTATTCAATGTG	93591	gRNA_OTUB2_2	CGCCATCCGCAAGACCAAAG	14804
gRNA_USP14_3	TCATGTAACAAGTGTTACCA	41313	gRNA_Non-Targeting_Control_2	CAAACAGTCTAAGGCGACGA	14960	gRNA_OTUD7A_1	TATGGGCTAGGACAAAAACG	81202	gRNA_USP17L24_3	AGCAGGTATTTCCCATATTC	81823	gRNA_USP4_1	GAAATGGCAACTCAGCACAT	93387	gRNA_Non-Targeting_Control_24	GTGCGTGAGTATTAACGCTC	14775
gRNA_FAM63A_2	AGGTCAAAGACACTGCACTC	41168	gRNA_STAMBPL1_3	GTTAAGGCCCTGTTTACAGG	6885	gRNA_USP36_1	CAGGTTGGATCGTCAAACGC	80623	gRNA_FAM63A_3	GTCAAGTGGATCCCTTGGAA	81306	gRNA_JOSD1_2	TGAAGCCCATGACGTTAGTG	92114	gRNA_USP33_2	ATAGTCAAAGCAGGATCATG	14722
gRNA_USP27X_2	ACTGCTTGCGGAGGTTTACG	41129	gRNA_Non-Targeting_Control_9	GTCCTCATCCGGTCAGGCTG	11585	gRNA_USP31_1	CAAACCTGAATGCAAACCGT	80420	gRNA_USP17L17_1	AATCTTGTTGCCTGTCACAT	81210	gRNA_USP22_3	TGGGGCTCTGCATCTCACAG	91685	gRNA_OTUD5_3	CGGCGCAGGCTACAACAGTG	14674
gRNA_USP44_3	TATTGGCCTTCGTTTAACTG	40735	gRNA_OTUD1_2	GCGGTGGACGTGTAGTGCGG	6889	gRNA_UCHL3_1	GGATCCTGAACTCCTTAGCA	78676	gRNA_USP46_1	GTTCATATACCTTAGACAGT	81161	gRNA_ATXN3_1	TCAACAGTCCAGAGTATCAG	91518	gRNA_ATXN3_2	CTGTCATCCATATTTCCAGA	14626
gRNA_USP45_2	GACGTGACTCAGAATTCATG	40172	gRNA_USP37_3	ACTCCAAATTAGTAATAACA	2117	gRNA_TNFAIP3_3	CTTGTGGCGCTGAAAACGAA	78382	gRNA_FAM188B3_2	TGGTTGCCTTCATGATTCTG	81114	gRNA_OTUD7B_3	TAGTGTAATTCTGTCCCTAG	91438	gRNA_OTUD1_2	GCGGTGGACGTGTAGTGCGG	14618
gRNA_USP46_1	GTTCATATACCTTAGACAGT	39972	gRNA_USP54_2	AAGGTTTACCTAAAGCACCA	3480	gRNA_USP21_2	AGGACCGGGCGGATATCATG	78358	gRNA_USP45_2	GACGTGACTCAGAATTCATG	81085	gRNA_Non-Targeting_Control_24	GTGCGTGAGTATTAACGCTC	90844	gRNA_USP21_2	AGGACCGGGCGGATATCATG	14594
gRNA_USP34_3	TTGTATCTTTGGGTGCACCA	39804	gRNA_CYLD_1	AAAGGCCTCCAAATAGACGT	7990	gRNA_USP17L12_2	GAGTAAAGTTAACATCTTGG	78335	gRNA_OTUD1_2	GCGGTGGACGTGTAGTGCGG	80156	gRNA_USP17L21_1	AAAGTTAACATCTTGGAGGC	90785	gRNA_ZC3H12A_3	CAGGACGCTGTGGATCTCCG	14566
gRNA_USP17L24_3	AGCAGGTATTTCCCATATTC	39798	gRNA_USP47_3	CCATAAATGAGAGTCTGCAA	6645	gRNA_USP46_2	TGGCAACATGAACGAACCTG	77799	gRNA_FAM188B_3	ATACGGCATAGTGCAGAACA	79979	gRNA_USP17L1_3	GACATGGCCAGGACTGTGGA	90699	gRNA_USP44_1	ATCACTGCACAACTCGTAGT	14496
gRNA_USP17L17_1	AATCTTGTTGCCTGTCACAT	39704	gRNA_USP25_1	TGTGATGGTATGGAACCACT	8157	gRNA_ATXN3L_1	TGGAACATCAGACCAAGATG	77538	gRNA_Non-Targeting_Control_29	GGTGCGGTCTGCTTGTAGAT	79918	gRNA_FAM63B_2	GAGGGTCTACTAACCACCCA	90536	gRNA_USP20_2	CTCACCCTTTAACTCATCAG	14451
gRNA_USP17L2_1	TGACATGACCAGGACTGTGG	39689	gRNA_USP39_2	ACTGCCTGAAGCATCTCATG	2902	gRNA_USP17L20_3	CGTCCAACTCGGGGGCCTGG	76940	gRNA_USP44_1	ATCACTGCACAACTCGTAGT	79738	gRNA_OTUD1_2	GCGGTGGACGTGTAGTGCGG	89823	gRNA_STAMBPL1_1	CCAGACCTAAAGTAACGTCG	14377
gRNA_USP10_2	AAATAGCTGTAATATCCAGG	39633	gRNA_USP17L22_3	TCAAACGTGTCATCGTCACA	2549	gRNA_USP40_1	GAAAACAGCATGGACCACTG	75977	gRNA_USP17L12_3	GCAGGTCTCCTGTTACTCAG	79640	gRNA_USP17L8_3	ACACGGGTCTCAGATGAGAG	89521	gRNA_USP31_3	GACTTATTACCTGATCAGTG	14132
gRNA_PSMD14_3	TACCAACCAACAACCATCTC	39533	gRNA_Non-Targeting_Control_7	TTGTACGGTACTGGCTTTGT	20925	gRNA_ZC3H12A_3	CAGGACGCTGTGGATCTCCG	75524	gRNA_Non-Targeting_Control_23	TTATGTGAGCACGCCATTAC	79635	gRNA_USP38_1	GCTGATTATGAGCTGTCCGT	89305	gRNA_Non-Targeting_Control_25	CATTAAACCTTGCCCCACAA	14113
gRNA_FAM63A_3	GTCAAGTGGATCCCTTGGAA	39368	gRNA_ATXN3_3	CGAGTGTTAGAAGCAAATGA	9776	gRNA_USP49_1	CACCAAACAGGTCTTAAAGG	73835	gRNA_USP17L19_1	ACACGTTTGAGAGTGCTCCC	79634	gRNA_USP6_2	TATACTCCGAATAGGCCAGG	88562	gRNA_OTUD1_1	GCTCTTCGCCCCACGGACCG	14058
gRNA_JOSD1_1	TCTACCATGAGAAACAGCGC	39192	gRNA_OTUD6B_1	AAAGGATTGTGCTCTGACTG	7072	gRNA_CYLD_2	ATATTCAAGATCGTTCTGTG	73394	gRNA_USP49_2	GGCGGCGCGAGGTGAAACGG	79217	gRNA_OTUD1_3	CTCCGCCGCACTACTCGGGG	88414	gRNA_USP17L28_2	ACACGGGTCTCACATGAGAG	13894
gRNA_FAM188B_3	ATACGGCATAGTGCAGAACA	39143	gRNA_UCHL5_3	GAATTAGATGGATTAAGAGA	3702	gRNA_Non-Targeting_Control_31	TGACGCTCCACGTCCGGACC	73014	gRNA_JOSD1_1	TCTACCATGAGAAACAGCGC	79178	gRNA_USP21_2	AGGACCGGGCGGATATCATG	87754	gRNA_FAM63B_2	GAGGGTCTACTAACCACCCA	13825
gRNA_USP44_1	ATCACTGCACAACTCGTAGT	38986	gRNA_USP12_2	TTGCGTATAAGAGTCAACCT	7866	gRNA_COPS6_2	CAAGGAATATTATTACACCA	72243	gRNA_PSMD14_3	TACCAACCAACAACCATCTC	79055	gRNA_ZC3H12A_3	CAGGACGCTGTGGATCTCCG	87447	gRNA_USP26_3	GAAGCCTAAAAGTGAATTTG	13755
gRNA_OTUD4_1	TCTTCAATACAGGAATGGGT	38621	gRNA_FAM63A_3	GTCAAGTGGATCCCTTGGAA	7314	gRNA_USP11_1	GGTCTCCATGATGATCAACT	72002	gRNA_USP34_3	TTGTATCTTTGGGTGCACCA	79042	gRNA_FAM63B_1	TAGCTGCGAGTTCAATAGTG	87330	gRNA_ZC3H12A_2	GGAGTGGAAGCGCTTCATCG	13685
gRNA_USP30_2	TGTGTGTGACAACTGTACAA	38539	gRNA_USP17L12_2	GAGTAAAGTTAACATCTTGG	7265	gRNA_USP49_2	GGCGGCGCGAGGTGAAACGG	71924	gRNA_Non-Targeting_Control_7	TTGTACGGTACTGGCTTTGT	79016	gRNA_STAMBPL1_3	GTTAAGGCCCTGTTTACAGG	86858	gRNA_USP9Y_3	TGATGGTCCCAATCTAGAGG	13633
gRNA_USP5_1	ATCCTGGGTAGGGTCCGTCG	38426	gRNA_USP45_1	AATGAATGGATCTTTCACCG	6832	gRNA_USP27X_1	TAAACCGATCGTAAAGCTGG	71243	gRNA_USP10_2	AAATAGCTGTAATATCCAGG	78404	gRNA_USP29_3	TGGTTCAACGGGTAGAACCA	86712	gRNA_JOSD1_2	TGAAGCCCATGACGTTAGTG	13599
gRNA_USP21_3	GAGAAGGGACTTCCGGCAAG	38377	gRNA_OTUB2_1	AGTGCCGGAAGAAGTCTGCT	12139	gRNA_FAM63B_3	ACCTTGTACTGCCCTCTCAG	70201	gRNA_USP17L2_1	TGACATGACCAGGACTGTGG	78243	gRNA_USP44_1	ATCACTGCACAACTCGTAGT	85834	gRNA_Non-Targeting_Control_21	TCCGGAGGCTCAAACCAAGT	13583
gRNA_USP6_2	TATACTCCGAATAGGCCAGG	38265	gRNA_USP35_2	TCAAGGAGGACTCGAACTCG	7026	gRNA_Non-Targeting_Control_18	CCAAAAAGATGAATATCTCG	70117	gRNA_STAMBP_3	CCAGAGCGGAAGTACCGACG	78102	gRNA_USP46_2	TGGCAACATGAACGAACCTG	85210	gRNA_Non-Targeting_Control_34	GTTGATCGAAAATGGGAGAA	13522
gRNA_USP49_2	GGCGGCGCGAGGTGAAACGG	38255	gRNA_UCHL1_2	ACAGGCAGCCCATGATGCCG	8187	gRNA_USP51_2	TTGATGAGAAACATCTGTTG	70080	gRNA_USP34_1	GTCTTGTATCACACGAACTG	77756	gRNA_USP20_3	CCTTTCTTGAGCACGTACGA	85167	gRNA_USP42_2	GGACGCAAAGGGGATGATCG	13471
gRNA_OTUB2_2	CGCCATCCGCAAGACCAAAG	37997	gRNA_MPND_1	AGTCTGACCTGGCCAAGTCG	7570	gRNA_FAM188B2_1	TCACTTACTATGTTTCAGAG	70076	gRNA_COPS5_2	GATGGGTCTGATGCTAGGAA	77751	gRNA_USP46_3	TGTATGCCAACACATTCTCC	84638	gRNA_USP2_3	TCTGGATGGGCTCCATAACG	13425
gRNA_USP46_3	TGTATGCCAACACATTCTCC	37856	gRNA_USP34_1	GTCTTGTATCACACGAACTG	13418	gRNA_USP26_1	GGACAGAGTTCATCAAAACG	69807	gRNA_USP44_3	TATTGGCCTTCGTTTAACTG	77625	gRNA_USP17L5_2	GCCAGCAGCCAATGCCTGTG	84634	gRNA_USP31_2	GGCAACGCCAGGCATCATCG	13425
gRNA_OTUD1_2	GCGGTGGACGTGTAGTGCGG	37833	gRNA_USP17L17_1	AATCTTGTTGCCTGTCACAT	11164	gRNA_USP29_2	TACATTTAGTAGGCTCTCCA	69729	gRNA_USP6_2	TATACTCCGAATAGGCCAGG	77441	gRNA_USP11_1	GGTCTCCATGATGATCAACT	84160	gRNA_YOD1_2	AGTGTGTACTATGTCGTCGA	13295
gRNA_FAM188B3_2	TGGTTGCCTTCATGATTCTG	37683	gRNA_USP17L28_3	GCATAGAGGACATAGACGAG	4021	gRNA_USP17L13_3	ATGAGGGTGGTGTCCTTAGA	69283	gRNA_USP21_3	GAGAAGGGACTTCCGGCAAG	77358	gRNA_USP12_1	CAGCACACCAGACCCAACGT	83993	gRNA_USP17L15_2	ACATGTATAGCTTCATGTCA	13291
gRNA_USP17L5_3	GTGTAAAGTTAACGTCTTGG	37633	gRNA_USP26_2	ATAGTGACGGTTACACAAAG	7319	gRNA_FAM188B_2	AAGTCTGGTCTGATTGTGCG	69238	gRNA_USP46_3	TGTATGCCAACACATTCTCC	77288	gRNA_USP17L13_3	ATGAGGGTGGTGTCCTTAGA	83650	gRNA_USP17L8_3	ACACGGGTCTCAGATGAGAG	13214
gRNA_USP5_3	ATGGATGCAGCCCTTAACAA	37477	gRNA_USP42_3	TCTCATTTATAGGCTAGCAA	10602	gRNA_USP4_2	TCAACAGAGACAACCCTCTG	69076	gRNA_USP17L25_1	AAGAGATTCTCCGATGTCAC	76866	gRNA_FAM188B_2	AAGTCTGGTCTGATTGTGCG	83532	gRNA_USP17L4_1	AGTGTGTAAAGTTAACGTGT	13093
gRNA_ATXN3L_2	ATCGAGCCAAGAAATTTGCA	37402	gRNA_OTUD4_3	GAACAGAGAGAAATTTGAAG	2664	gRNA_OTUD7A_3	CAGAAAAGCGGCTTTCCCGG	68993	gRNA_USP5_1	ATCCTGGGTAGGGTCCGTCG	76812	gRNA_USP5_1	ATCCTGGGTAGGGTCCGTCG	83118	gRNA_FAM188B4_3	TTATTTCACATAAGTTGCCA	13031
gRNA_Non-Targeting_Control_14	AAGAATTAGGCACGGTTACT	37279	gRNA_BAP1_1	GTCCATCAAGACTAGCAGCG	6616	gRNA_STAMBP_3	CCAGAGCGGAAGTACCGACG	68129	gRNA_USP9Y_2	TGGTACAGACCCCATAACAC	76575	gRNA_Non-Targeting_Control_8	ATCTGCCATGGCGTCCTGGC	82779	gRNA_USP17L13_3	ATGAGGGTGGTGTCCTTAGA	12972
gRNA_USP17L18_3	GACGACTCACTCTACTTGGG	37275	gRNA_USP18_3	TCAGGTGTTCGTAATGAATG	2102	gRNA_USP17L17_3	GCATAGAGGACATAGACAAG	67982	gRNA_OTUD4_1	TCTTCAATACAGGAATGGGT	76405	gRNA_USP42_2	GGACGCAAAGGGGATGATCG	82370	gRNA_OTUD1_3	CTCCGCCGCACTACTCGGGG	12961
gRNA_USP39_2	ACTGCCTGAAGCATCTCATG	37260	gRNA_USP17L22_1	AGTGAACATGAGAAATTCAT	2555	gRNA_OTUB2_2	CGCCATCCGCAAGACCAAAG	67440	gRNA_OTUB2_2	CGCCATCCGCAAGACCAAAG	76261	gRNA_USP19_1	GAGGAATGACTCTTTCATCG	82215	gRNA_TNFAIP3_3	CTTGTGGCGCTGAAAACGAA	12951
gRNA_UCHL5_1	TTTATTATTTCAGGTTGCCG	37246	gRNA_USP17L25_3	GAGGGCTGGATGACGTGGCC	15814	gRNA_USP17L18_2	CCTTGTTCCAGTCGACATGG	67166	gRNA_USP17L5_3	GTGTAAAGTTAACGTCTTGG	75791	gRNA_USP22_1	CCTCGAACTGCACCATAGGT	81959	gRNA_FAM63B_1	TAGCTGCGAGTTCAATAGTG	12783
gRNA_OTUB1_3	GTAGACCACAAGGTAGTCGG	37238	gRNA_Non-Targeting_Control_19	TGCCGTTAGCATGCGATCCC	11821	gRNA_USP17L4_3	GCTGGGTGGAGTTGTCACGA	66925	gRNA_USP17L4_2	TATGCAAGCTCACATCACAT	75706	gRNA_Non-Targeting_Control_31	TGACGCTCCACGTCCGGACC	81890	gRNA_Non-Targeting_Control_8	ATCTGCCATGGCGTCCTGGC	12593
gRNA_USP9Y_2	TGGTACAGACCCCATAACAC	37078	gRNA_USP27X_3	CGGGACTCGGCATCTCACAT	16833	gRNA_Non-Targeting_Control_13	AAGCCATTGTATAACTCCAG	66804	gRNA_USP5_3	ATGGATGCAGCCCTTAACAA	75617	gRNA_USP44_2	TGGTTTGAACAATCACCCAT	81885	gRNA_USP17L12_2	GAGTAAAGTTAACATCTTGG	12559
gRNA_USP51_1	CACAGACCAGACACAAGCTG	37034	gRNA_USP26_3	GAAGCCTAAAAGTGAATTTG	8578	gRNA_FAM63A_3	GTCAAGTGGATCCCTTGGAA	66776	gRNA_UCHL5_1	TTTATTATTTCAGGTTGCCG	75509	gRNA_USP49_3	CGTGCTCAATGATAACCCAG	81440	gRNA_USP51_2	TTGATGAGAAACATCTGTTG	12377
gRNA_USP17L4_1	AGTGTGTAAAGTTAACGTGT	36932	gRNA_TNFAIP3_3	CTTGTGGCGCTGAAAACGAA	9075	gRNA_USP17L21_1	AAAGTTAACATCTTGGAGGC	66719	gRNA_UCHL5_2	GTTACTGAACTGTACCCACC	75462	gRNA_STAMBP_3	CCAGAGCGGAAGTACCGACG	81360	gRNA_USP36_2	GAGCACACGTATGAGAGCTG	12284
gRNA_USP17L13_1	CAGGAACCAAATCATCACAG	36800	gRNA_UCHL1_3	CGCCCTACCTGGGCCGTGAG	14406	gRNA_FAM63B_2	GAGGGTCTACTAACCACCCA	66516	gRNA_OTUB1_3	GTAGACCACAAGGTAGTCGG	75047	gRNA_USP17L29_1	CTACCTGCTTGTGCCCGGGA	80464	gRNA_Non-Targeting_Control_17	AGTTCCCAGAAATATATTGC	12219
gRNA_USP17L19_1	ACACGTTTGAGAGTGCTCCC	36669	gRNA_MPND_2	CTGACACGGAGTGAGGTCGT	16231	gRNA_USP17L3_2	CTACCTGCTTGTGGCCGGGA	66450	gRNA_USP51_1	CACAGACCAGACACAAGCTG	74847	gRNA_USP40_1	GAAAACAGCATGGACCACTG	80114	gRNA_USP25_2	GGCACCAAGGCACATAACGG	12150
gRNA_USP34_2	TCATATACCACGATTAACAG	36584	gRNA_PAN2_1	GTTCCACCTTAAAAGTACGG	3181	gRNA_ZC3H12A_1	CAGCTCCCTCTAGTCCCGCG	66281	gRNA_USP4_1	GAAATGGCAACTCAGCACAT	74799	gRNA_COPS5_3	GGGTGGTATCATAGCCACCC	80050	gRNA_USP17L21_1	AAAGTTAACATCTTGGAGGC	12097
gRNA_USP17L4_2	TATGCAAGCTCACATCACAT	36331	gRNA_OTUD7A_3	CAGAAAAGCGGCTTTCCCGG	5670	gRNA_TNFAIP3_2	TATGCCATGAGTGCTCAGAG	65889	gRNA_USP30_2	TGTGTGTGACAACTGTACAA	74740	gRNA_TNFAIP3_2	TATGCCATGAGTGCTCAGAG	79822	gRNA_USP51_1	CACAGACCAGACACAAGCTG	12058
gRNA_COPS5_2	GATGGGTCTGATGCTAGGAA	36321	gRNA_USP51_2	TTGATGAGAAACATCTGTTG	6383	gRNA_BAP1_3	CACGGACGTATCATCCACCA	65834	gRNA_ATXN3L_2	ATCGAGCCAAGAAATTTGCA	74614	gRNA_USP17L12_2	GAGTAAAGTTAACATCTTGG	79719	gRNA_STAMBP_3	CCAGAGCGGAAGTACCGACG	11926
gRNA_USP17L12_3	GCAGGTCTCCTGTTACTCAG	36244	gRNA_USP17L24_3	AGCAGGTATTTCCCATATTC	8456	gRNA_USP26_3	GAAGCCTAAAAGTGAATTTG	65532	gRNA_Non-Targeting_Control_14	AAGAATTAGGCACGGTTACT	74363	gRNA_OTUB2_2	CGCCATCCGCAAGACCAAAG	79651	gRNA_Non-Targeting_Control_4	AAATTGGCTTTCGTTCGTGC	11879
gRNA_Non-Targeting_Control_26	CTATATTGTCGCGCAGTGGA	36096	gRNA_USP5_2	GGAGAAGTTTGAATTAGACG	3461	gRNA_OTUB1_1	GCAGGACCGAATTCAGCAAG	65231	gRNA_USP14_2	GCCTGCCAGACAGAAAGTTA	73625	gRNA_USP3_3	GTTGTCACGGCTATATTCGG	79492	gRNA_OTUB1_1	GCAGGACCGAATTCAGCAAG	11741
gRNA_OTUD7A_1	TATGGGCTAGGACAAAAACG	36088	gRNA_USP24_1	AGACACGGACAACTGTCGGT	4718	gRNA_USP38_1	GCTGATTATGAGCTGTCCGT	64798	gRNA_Non-Targeting_Control_26	CTATATTGTCGCGCAGTGGA	73499	gRNA_USP45_2	GACGTGACTCAGAATTCATG	79113	gRNA_USP11_1	GGTCTCCATGATGATCAACT	11682
gRNA_USP34_1	GTCTTGTATCACACGAACTG	35950	gRNA_OTUB1_3	GTAGACCACAAGGTAGTCGG	7625	gRNA_USP20_1	GTCGACCTACCAATTGGACA	64777	gRNA_USP30_1	TAAATCAGTACATACCCATG	73328	gRNA_USP48_1	TGAGATGCGTAAGCAAAGTG	79092	gRNA_USP22_1	CCTCGAACTGCACCATAGGT	11655
gRNA_USP4_1	GAAATGGCAACTCAGCACAT	35950	gRNA_USP22_1	CCTCGAACTGCACCATAGGT	8135	gRNA_ATXN3_2	CTGTCATCCATATTTCCAGA	64555	gRNA_FAM63B_2	GAGGGTCTACTAACCACCCA	73205	gRNA_USP20_1	GTCGACCTACCAATTGGACA	78974	gRNA_USP44_2	TGGTTTGAACAATCACCCAT	11567
gRNA_UCHL5_2	GTTACTGAACTGTACCCACC	35536	gRNA_USP49_3	CGTGCTCAATGATAACCCAG	6735	gRNA_BRCC3_1	GAGCGTGGTTGAGACAAACG	63951	gRNA_USP39_2	ACTGCCTGAAGCATCTCATG	73194	gRNA_USP51_1	CACAGACCAGACACAAGCTG	78592	gRNA_USP20_1	GTCGACCTACCAATTGGACA	11556
gRNA_FAM188A_2	TTGGACCAGTATTCAATGTG	35433	gRNA_USP24_2	GTTTAATCCTACCTGTACCA	3012	gRNA_OTUB2_1	AGTGCCGGAAGAAGTCTGCT	63860	gRNA_UCHL1_2	ACAGGCAGCCCATGATGCCG	73176	gRNA_FAM188B2_1	TCACTTACTATGTTTCAGAG	78348	gRNA_OTUB1_2	CAGACACAGCCTTGAACCTG	11502
gRNA_ATXN3L_3	TCAGAAAACATGGATGATAC	35363	gRNA_USP9X_2	ACAAGTGCTATATCTAACAG	6332	gRNA_USP48_3	CAGACACGTAAACCCAAGTG	63458	gRNA_OTUD7A_1	TATGGGCTAGGACAAAAACG	73116	gRNA_UCHL1_2	ACAGGCAGCCCATGATGCCG	78250	gRNA_USP48_1	TGAGATGCGTAAGCAAAGTG	11454
gRNA_Non-Targeting_Control_10	TCGCGCTTGGGTTATACGCT	35248	gRNA_USP17L30_2	CGTGGACCAGCACAGCATAG	6085	gRNA_USP17L12_3	GCAGGTCTCCTGTTACTCAG	62818	gRNA_UCHL3_1	GGATCCTGAACTCCTTAGCA	72995	gRNA_FAM63A_3	GTCAAGTGGATCCCTTGGAA	77617	gRNA_BRCC3_1	GAGCGTGGTTGAGACAAACG	11350
gRNA_USP14_2	GCCTGCCAGACAGAAAGTTA	35208	gRNA_ZC3H12A_3	CAGGACGCTGTGGATCTCCG	10370	gRNA_USP30_1	TAAATCAGTACATACCCATG	62419	gRNA_USP17L4_1	AGTGTGTAAAGTTAACGTGT	72987	gRNA_USP2_1	GCTGAGACCCGACATCACTG	76989	gRNA_USP19_3	GAGCGAGGCGGGCATAAGTG	11347
gRNA_STAMBPL1_3	GTTAAGGCCCTGTTTACAGG	35113	gRNA_USP43_1	CACACCACTGACCTGTACAG	8332	gRNA_USP6_2	TATACTCCGAATAGGCCAGG	62310	gRNA_USP43_2	AAGTACGGCTCTCAGTTCCA	72962	gRNA_USP45_1	AATGAATGGATCTTTCACCG	75328	gRNA_USP44_3	TATTGGCCTTCGTTTAACTG	11251
gRNA_STAMBP_3	CCAGAGCGGAAGTACCGACG	35104	gRNA_USP6_3	TCTCCGGAACCTGATTGACG	4094	gRNA_USP30_2	TGTGTGTGACAACTGTACAA	62124	gRNA_USP39_3	AGGCGTGAGACTTCAAACCC	72718	gRNA_USP11_2	TGATAGGCAGTGGAACACTG	75227	gRNA_UCHL5_1	TTTATTATTTCAGGTTGCCG	11249
gRNA_USP31_3	GACTTATTACCTGATCAGTG	34951	gRNA_USP17L5_2	GCCAGCAGCCAATGCCTGTG	8386	gRNA_USP31_3	GACTTATTACCTGATCAGTG	62123	gRNA_Non-Targeting_Control_10	TCGCGCTTGGGTTATACGCT	72162	gRNA_USP49_2	GGCGGCGCGAGGTGAAACGG	75134	gRNA_USP11_2	TGATAGGCAGTGGAACACTG	11239
gRNA_UCHL1_2	ACAGGCAGCCCATGATGCCG	34907	gRNA_OTUD5_3	CGGCGCAGGCTACAACAGTG	8343	gRNA_USP49_3	CGTGCTCAATGATAACCCAG	61378	gRNA_ATXN3_1	TCAACAGTCCAGAGTATCAG	71925	gRNA_USP17L20_2	CCAAGTGCTCGTCCAACTCG	74972	gRNA_OTUD6B_2	TGCTTGAGAATCAGCCACCT	11237
gRNA_USP3_3	GTTGTCACGGCTATATTCGG	34730	gRNA_MYSM1_3	ATGGTGTTATCCAAGGTCCA	2819	gRNA_STAMBPL1_1	CCAGACCTAAAGTAACGTCG	60831	gRNA_STAMBP_1	AATCGATGGATTGCGCCATG	71644	gRNA_STAMBPL1_1	CCAGACCTAAAGTAACGTCG	74856	gRNA_USP26_1	GGACAGAGTTCATCAAAACG	11221
gRNA_JOSD2_3	AGGATCAGCCCCAGTACCTG	34682	gRNA_USP17L11_3	GTGTTCGTCTGAGACATGTA	829	gRNA_USP3_3	GTTGTCACGGCTATATTCGG	59965	gRNA_STAMBPL1_3	GTTAAGGCCCTGTTTACAGG	71588	gRNA_USP17L15_2	ACATGTATAGCTTCATGTCA	73299	gRNA_USP22_3	TGGGGCTCTGCATCTCACAG	11137
gRNA_USP30_1	TAAATCAGTACATACCCATG	34234	gRNA_USP17L8_2	GGAGAGAATGCCTATCCTTG	18342	gRNA_USP17L24_3	AGCAGGTATTTCCCATATTC	59422	gRNA_USP17L18_3	GACGACTCACTCTACTTGGG	71569	gRNA_USP33_2	ATAGTCAAAGCAGGATCATG	73165	gRNA_USP40_1	GAAAACAGCATGGACCACTG	11125
gRNA_BRCC3_2	AGTAATGGGGCTGTGCATAG	34190	gRNA_USP30_1	TAAATCAGTACATACCCATG	5286	gRNA_USP17L2_1	TGACATGACCAGGACTGTGG	58938	gRNA_USP7_3	GGCAGTAGAACAGCTCGATG	71553	gRNA_ATXN3L_3	TCAGAAAACATGGATGATAC	72856	gRNA_USP49_3	CGTGCTCAATGATAACCCAG	11044
gRNA_OTUD6B_3	GCGCTAGAAGAAACCTGCAC	34139	gRNA_USP17L7_3	CTTCCATAGAGGTGAGCAGG	24089	gRNA_USP32_2	GGAAAGAATGCTCCACGTGG	58611	gRNA_COPS5_1	AGCAGCCTGAGCATTTACTC	71503	gRNA_USP19_3	GAGCGAGGCGGGCATAAGTG	72694	gRNA_USP29_3	TGGTTCAACGGGTAGAACCA	11034
gRNA_USP24_2	GTTTAATCCTACCTGTACCA	34011	gRNA_USP37_2	AATGTGGTGCTTCGACCCAG	1449	gRNA_USP54_1	ACTGACCACAGACTCATGGT	58305	gRNA_ATXN3L_3	TCAGAAAACATGGATGATAC	71495	gRNA_USP17L18_1	GAGGACGACTCACTCTACTT	72515	gRNA_TNFAIP3_2	TATGCCATGAGTGCTCAGAG	11018
gRNA_USP39_3	AGGCGTGAGACTTCAAACCC	33968	gRNA_USP17L29_3	ATTGTGGTGTTTGTCTCCAG	201	gRNA_USP45_2	GACGTGACTCAGAATTCATG	57984	gRNA_USP1_1	GGCGACTGCTTAACACACTG	71412	gRNA_USP17L20_3	CGTCCAACTCGGGGGCCTGG	71286	gRNA_USP17L10_2	TGACATGGCCAGGAATGTGG	10971
gRNA_USP28_1	AAAATGTTGGCAATACATGT	33914	gRNA_UCHL5_2	GTTACTGAACTGTACCCACC	7257	gRNA_UCHL5_1	TTTATTATTTCAGGTTGCCG	57767	gRNA_JOSD2_3	AGGATCAGCCCCAGTACCTG	71122	gRNA_ZC3H12A_2	GGAGTGGAAGCGCTTCATCG	70430	gRNA_USP17L21_3	GAGTAACAGGAGACCTGCTG	10938
gRNA_STAMBP_2	AAGGCCAGCTAAGCCACCTG	33843	gRNA_Non-Targeting_Control_13	AAGCCATTGTATAACTCCAG	9893	gRNA_OTUD7B_3	TAGTGTAATTCTGTCCCTAG	57742	gRNA_BRCC3_2	AGTAATGGGGCTGTGCATAG	70749	gRNA_OTUD6B_2	TGCTTGAGAATCAGCCACCT	70350	gRNA_USP47_3	CCATAAATGAGAGTCTGCAA	10931
gRNA_USP43_2	AAGTACGGCTCTCAGTTCCA	33801	gRNA_USP5_3	ATGGATGCAGCCCTTAACAA	3093	gRNA_USP35_2	TCAAGGAGGACTCGAACTCG	57549	gRNA_USP19_1	GAGGAATGACTCTTTCATCG	70623	gRNA_USP4_2	TCAACAGAGACAACCCTCTG	70245	gRNA_USP3_1	CCCATTCCTTAACTCCACGG	10926
gRNA_ZRANB1_1	TCAGTTCTACAAGCTACCTG	33781	gRNA_USP46_3	TGTATGCCAACACATTCTCC	6208	gRNA_USP22_3	TGGGGCTCTGCATCTCACAG	57106	gRNA_USP24_2	GTTTAATCCTACCTGTACCA	70463	gRNA_OTUD6B_3	GCGCTAGAAGAAACCTGCAC	70119	gRNA_USP17L29_2	TGACGTGGCCAGGATTGTGG	10861
gRNA_USP26_1	GGACAGAGTTCATCAAAACG	33703	gRNA_USP29_2	TACATTTAGTAGGCTCTCCA	5265	gRNA_OTUD3_2	GTGACCTACCTGCCACAAAG	57091	gRNA_FAM188A_2	TTGGACCAGTATTCAATGTG	70322	gRNA_USP9Y_1	TAACAATACTCATCGCCTAG	69984	gRNA_USP19_1	GAGGAATGACTCTTTCATCG	10825
gRNA_USP17L22_2	TACATGTCTCAGCAGAACAC	33665	gRNA_USP17L12_1	TACATGTCTCAGCCGAACAC	2780	gRNA_USP17L25_2	TGAATTTCTCATGTTCACTG	56871	gRNA_USP17L22_1	AGTGAACATGAGAAATTCAT	70272	gRNA_USP17L10_2	TGACATGGCCAGGAATGTGG	69473	gRNA_USP3_3	GTTGTCACGGCTATATTCGG	10788
gRNA_COPS5_1	AGCAGCCTGAGCATTTACTC	33578	gRNA_USP29_3	TGGTTCAACGGGTAGAACCA	11386	gRNA_USP43_1	CACACCACTGACCTGTACAG	56761	gRNA_USP7_2	GGCAACCTTTCAGTTCACTG	70077	gRNA_USP51_2	TTGATGAGAAACATCTGTTG	67816	gRNA_USP2_1	GCTGAGACCCGACATCACTG	10763
gRNA_UCHL3_1	GGATCCTGAACTCCTTAGCA	33547	gRNA_USP17L22_2	TACATGTCTCAGCAGAACAC	2572	gRNA_USP54_3	GTGGAGCATTCATCAACACA	56597	gRNA_USP34_2	TCATATACCACGATTAACAG	69693	gRNA_VCPIP1_2	CAGTCTGATGCAATATAGTG	67351	gRNA_USP43_1	CACACCACTGACCTGTACAG	10605
gRNA_USP37_3	ACTCCAAATTAGTAATAACA	33481	gRNA_FAM188B_3	ATACGGCATAGTGCAGAACA	12854	gRNA_VCPIP1_2	CAGTCTGATGCAATATAGTG	56541	gRNA_STAMBP_2	AAGGCCAGCTAAGCCACCTG	69069	gRNA_YOD1_2	AGTGTGTACTATGTCGTCGA	67209	gRNA_OTUB1_3	GTAGACCACAAGGTAGTCGG	10579
gRNA_USP48_1	TGAGATGCGTAAGCAAAGTG	33448	gRNA_USP14_2	GCCTGCCAGACAGAAAGTTA	8405	gRNA_USP33_2	ATAGTCAAAGCAGGATCATG	56402	gRNA_Non-Targeting_Control_19	TGCCGTTAGCATGCGATCCC	69066	gRNA_UCHL3_1	GGATCCTGAACTCCTTAGCA	67015	gRNA_ATXN3L_1	TGGAACATCAGACCAAGATG	10562
gRNA_USP19_1	GAGGAATGACTCTTTCATCG	33380	gRNA_USP47_2	TGATCGAATGACATTTCCCG	5775	gRNA_USP26_2	ATAGTGACGGTTACACAAAG	55884	gRNA_USP17L3_3	GCCAGAAGCCAATGCCTGTG	68987	gRNA_USP3_1	CCCATTCCTTAACTCCACGG	66759	gRNA_USP54_1	ACTGACCACAGACTCATGGT	10503
gRNA_USP17L3_3	GCCAGAAGCCAATGCCTGTG	33361	gRNA_USP3_3	GTTGTCACGGCTATATTCGG	5728	gRNA_COPS5_2	GATGGGTCTGATGCTAGGAA	55822	gRNA_USP31_3	GACTTATTACCTGATCAGTG	67809	gRNA_USP31_2	GGCAACGCCAGGCATCATCG	66487	gRNA_FAM63A_3	GTCAAGTGGATCCCTTGGAA	10496
gRNA_STAMBP_1	AATCGATGGATTGCGCCATG	33328	gRNA_USP32_2	GGAAAGAATGCTCCACGTGG	4957	gRNA_USP17L28_3	GCATAGAGGACATAGACGAG	55345	gRNA_Non-Targeting_Control_15	TAGACAACCGCGGAGAATGC	67717	gRNA_USP17L4_1	AGTGTGTAAAGTTAACGTGT	66451	gRNA_CYLD_1	AAAGGCCTCCAAATAGACGT	10483
gRNA_CYLD_1	AAAGGCCTCCAAATAGACGT	33282	gRNA_Non-Targeting_Control_12	CACTGCAGTATTCGTGGCCT	14238	gRNA_FAM63A_1	AGTCATCCCTGAAAACCATG	55304	gRNA_USP26_1	GGACAGAGTTCATCAAAACG	67650	gRNA_UCHL5_2	GTTACTGAACTGTACCCACC	66396	gRNA_USP17L20_3	CGTCCAACTCGGGGGCCTGG	10426
gRNA_USP7_3	GGCAGTAGAACAGCTCGATG	33225	gRNA_COPS5_2	GATGGGTCTGATGCTAGGAA	2503	gRNA_Non-Targeting_Control_5	TTAACTCGAACGCTCGAAAG	54897	gRNA_USP31_2	GGCAACGCCAGGCATCATCG	67546	gRNA_ATXN3L_1	TGGAACATCAGACCAAGATG	65609	gRNA_USP38_1	GCTGATTATGAGCTGTCCGT	10422
gRNA_Non-Targeting_Control_15	TAGACAACCGCGGAGAATGC	33174	gRNA_USP42_1	AAATATCTGACAAACAAGAG	3797	gRNA_YOD1_3	GAGGATTCGCTGACCGCCGG	54646	gRNA_OTUD6B_3	GCGCTAGAAGAAACCTGCAC	67339	gRNA_USP25_2	GGCACCAAGGCACATAACGG	64854	gRNA_USP45_1	AATGAATGGATCTTTCACCG	10383
gRNA_USP42_3	TCTCATTTATAGGCTAGCAA	33104	gRNA_USP3_2	CTACACTTGGAACTTCAGGG	5042	gRNA_USP37_1	AGGGTTGCTAGAAAATCGGT	54633	gRNA_USP17L27_2	CCCTTACCTGGACATCGCCC	67336	gRNA_USP35_2	TCAAGGAGGACTCGAACTCG	64689	gRNA_USP42_3	TCTCATTTATAGGCTAGCAA	10359
gRNA_ATXN3_1	TCAACAGTCCAGAGTATCAG	33053	gRNA_ZC3H12A_2	GGAGTGGAAGCGCTTCATCG	5995	gRNA_FAM188A_1	GCTGTTTCTAATGTATGGGA	54511	gRNA_ZRANB1_1	TCAGTTCTACAAGCTACCTG	67281	gRNA_USP47_3	CCATAAATGAGAGTCTGCAA	64527	gRNA_FAM63A_2	AGGTCAAAGACACTGCACTC	10281
gRNA_FAM188A_1	GCTGTTTCTAATGTATGGGA	32986	gRNA_BAP1_3	CACGGACGTATCATCCACCA	10985	gRNA_USP17L27_3	TTGCCAACTACATGCTGTCC	53681	gRNA_USP17L10_3	GGTCTCCTGCTACTCAGAGG	67218	gRNA_OTULIN_2	ATTGCTTATACATGAAAGAG	63785	gRNA_USP5_1	ATCCTGGGTAGGGTCCGTCG	10212
gRNA_USP7_2	GGCAACCTTTCAGTTCACTG	32984	gRNA_USP17L7_2	CAAAGGTGTCTGAAACGCCG	11266	gRNA_USP3_1	CCCATTCCTTAACTCCACGG	53570	gRNA_USP28_1	AAAATGTTGGCAATACATGT	66821	gRNA_USP54_1	ACTGACCACAGACTCATGGT	63738	gRNA_USP17L30_2	CGTGGACCAGCACAGCATAG	10205
gRNA_USP2_3	TCTGGATGGGCTCCATAACG	32895	gRNA_STAMBPL1_2	AAGAAGCAAGAGTTAGCCCG	6109	gRNA_USP17L1_1	TCAAAGCTCAAGAAGTCCAG	53538	gRNA_USP37_3	ACTCCAAATTAGTAATAACA	66722	gRNA_OTUD6B_1	AAAGGATTGTGCTCTGACTG	63651	gRNA_USP38_3	TCTCTATGAACCTATTCTGG	10197
gRNA_FAM63B_2	GAGGGTCTACTAACCACCCA	32893	gRNA_USP15_1	CCAAGTTACTTAGGCCACAG	18230	gRNA_COPS6_3	TGGGTTGGTATACCACAGGG	53323	gRNA_ATXN3L_1	TGGAACATCAGACCAAGATG	66705	gRNA_USP43_1	CACACCACTGACCTGTACAG	63446	gRNA_USP17L24_2	TCTGAGCTGCCTGGATATCC	10154
gRNA_USP17L22_1	AGTGAACATGAGAAATTCAT	32644	gRNA_USP36_1	CAGGTTGGATCGTCAAACGC	9277	gRNA_USP20_3	CCTTTCTTGAGCACGTACGA	53266	gRNA_USP20_1	GTCGACCTACCAATTGGACA	66652	gRNA_BAP1_1	GTCCATCAAGACTAGCAGCG	63361	gRNA_USP17L29_1	CTACCTGCTTGTGCCCGGGA	10088
gRNA_BAP1_2	TCTACCCCATTGACCATGGT	32644	gRNA_FAM188B3_2	TGGTTGCCTTCATGATTCTG	12201	gRNA_USP40_3	TCGAGCTAATCCAAGATATG	52879	gRNA_JOSD2_1	TCACCTCTTGCAGATCTCAT	66538	gRNA_USP40_3	TCGAGCTAATCCAAGATATG	63344	gRNA_USP20_3	CCTTTCTTGAGCACGTACGA	9957
gRNA_USP31_2	GGCAACGCCAGGCATCATCG	32601	gRNA_Non-Targeting_Control_14	AAGAATTAGGCACGGTTACT	13282	gRNA_USP33_3	TCATCAAATACGGCAACCAG	52815	gRNA_USP45_1	AATGAATGGATCTTTCACCG	66122	gRNA_Non-Targeting_Control_4	AAATTGGCTTTCGTTCGTGC	63324	gRNA_COPS5_3	GGGTGGTATCATAGCCACCC	9893
gRNA_USP45_1	AATGAATGGATCTTTCACCG	32544	gRNA_ZRANB1_2	CAGCAAGCGTACTTCATCTG	10852	gRNA_YOD1_2	AGTGTGTACTATGTCGTCGA	52006	gRNA_USP48_1	TGAGATGCGTAAGCAAAGTG	65913	gRNA_USP17L30_2	CGTGGACCAGCACAGCATAG	62938	gRNA_BAP1_1	GTCCATCAAGACTAGCAGCG	9865
gRNA_ATXN3L_1	TGGAACATCAGACCAAGATG	32516	gRNA_Non-Targeting_Control_15	TAGACAACCGCGGAGAATGC	9413	gRNA_USP17L30_3	CCAGCAGCCAATGCCTGTGA	51536	gRNA_FAM188B_2	AAGTCTGGTCTGATTGTGCG	65840	gRNA_USP17L18_2	CCTTGTTCCAGTCGACATGG	62645	gRNA_Non-Targeting_Control_5	TTAACTCGAACGCTCGAAAG	9844
gRNA_USP1_1	GGCGACTGCTTAACACACTG	32346	gRNA_USP40_3	TCGAGCTAATCCAAGATATG	6125	gRNA_ZC3H12A_2	GGAGTGGAAGCGCTTCATCG	51455	gRNA_USP3_3	GTTGTCACGGCTATATTCGG	65822	gRNA_COPS6_3	TGGGTTGGTATACCACAGGG	62621	gRNA_FAM188B_2	AAGTCTGGTCTGATTGTGCG	9840
gRNA_USP35_2	TCAAGGAGGACTCGAACTCG	32297	gRNA_FAM188A_3	CCATATACAGGATCTATCAA	6653	gRNA_USP44_1	ATCACTGCACAACTCGTAGT	51103	gRNA_USP15_2	TCTAACTAAGTAAACTTCCA	65719	gRNA_Non-Targeting_Control_21	TCCGGAGGCTCAAACCAAGT	62127	gRNA_MPND_1	AGTCTGACCTGGCCAAGTCG	9791
gRNA_USP25_2	GGCACCAAGGCACATAACGG	32282	gRNA_OTUD6B_2	TGCTTGAGAATCAGCCACCT	8212	gRNA_Non-Targeting_Control_8	ATCTGCCATGGCGTCCTGGC	50945	gRNA_USP42_3	TCTCATTTATAGGCTAGCAA	65645	gRNA_OTUD7B_1	AAGCGTTGAAAAGGCGCTGG	61849	gRNA_OTUD6A_3	GGCCGGCTTCAAGCGCGAGG	9739
gRNA_USP26_3	GAAGCCTAAAAGTGAATTTG	32235	gRNA_USP17L20_1	GATGCTAGAGGCGGTGACCT	3285	gRNA_USP54_2	AAGGTTTACCTAAAGCACCA	50788	gRNA_JOSD1_2	TGAAGCCCATGACGTTAGTG	65577	gRNA_USP17L4_3	GCTGGGTGGAGTTGTCACGA	61682	gRNA_VCPIP1_3	CCCCTTGGTAGGCATAAAAG	9734
gRNA_JOSD1_2	TGAAGCCCATGACGTTAGTG	32214	gRNA_UCHL3_3	GGTCTCATGAGTAACTCGGA	3764	gRNA_USP9X_3	TCATGGCGATAAAACACATG	50667	gRNA_USP17L22_2	TACATGTCTCAGCAGAACAC	65339	gRNA_MPND_1	AGTCTGACCTGGCCAAGTCG	61453	gRNA_OTUB2_3	GATTTACCGGAGGAAAATCG	9676
gRNA_FAM188B_2	AAGTCTGGTCTGATTGTGCG	32176	gRNA_BRCC3_1	GAGCGTGGTTGAGACAAACG	4251	gRNA_USP51_1	CACAGACCAGACACAAGCTG	50577	gRNA_USP46_2	TGGCAACATGAACGAACCTG	65317	gRNA_USP17L21_3	GAGTAACAGGAGACCTGCTG	60287	gRNA_USP51_3	TCCATGCAGAACATTTAGCA	9675
gRNA_USP17L27_2	CCCTTACCTGGACATCGCCC	32045	gRNA_USP50_1	CCTATCTGATGACAGACATG	10022	gRNA_USP17L20_2	CCAAGTGCTCGTCCAACTCG	49836	gRNA_Non-Targeting_Control_35	CGACAACGTGCAGGTGTATC	65070	gRNA_FAM63A_2	AGGTCAAAGACACTGCACTC	59821	gRNA_USP17L19_3	CCTGTGAGGGCTGGATGACG	9669
gRNA_USP15_2	TCTAACTAAGTAAACTTCCA	32006	gRNA_USP12_3	CTTGTGATGAACTTCTTAGG	17680	gRNA_USP17L19_1	ACACGTTTGAGAGTGCTCCC	49573	gRNA_FAM63B_1	TAGCTGCGAGTTCAATAGTG	65063	gRNA_USP17L28_2	ACACGGGTCTCACATGAGAG	59593	gRNA_USP34_2	TCATATACCACGATTAACAG	9630
gRNA_FAM63B_1	TAGCTGCGAGTTCAATAGTG	32001	gRNA_USP17L20_3	CGTCCAACTCGGGGGCCTGG	5573	gRNA_JOSD1_1	TCTACCATGAGAAACAGCGC	49363	gRNA_USP2_3	TCTGGATGGGCTCCATAACG	65041	gRNA_JOSD2_3	AGGATCAGCCCCAGTACCTG	58668	gRNA_USP26_2	ATAGTGACGGTTACACAAAG	9494
gRNA_USP51_2	TTGATGAGAAACATCTGTTG	31814	gRNA_USP38_2	GAAGCCTCAAAGAATATCCG	4045	gRNA_UCHL1_2	ACAGGCAGCCCATGATGCCG	49146	gRNA_FAM188B4_3	TTATTTCACATAAGTTGCCA	64600	gRNA_USP2_2	ATAGCTACCGGATAGACCCC	57493	gRNA_OTUD7B_3	TAGTGTAATTCTGTCCCTAG	9366
gRNA_FAM188B4_3	TTATTTCACATAAGTTGCCA	31778	gRNA_Non-Targeting_Control_35	CGACAACGTGCAGGTGTATC	10091	gRNA_USP5_1	ATCCTGGGTAGGGTCCGTCG	48929	gRNA_CYLD_1	AAAGGCCTCCAAATAGACGT	64519	gRNA_CYLD_1	AAAGGCCTCCAAATAGACGT	56808	gRNA_USP17L20_2	CCAAGTGCTCGTCCAACTCG	9332
gRNA_USP40_1	GAAAACAGCATGGACCACTG	31778	gRNA_USP17L1_2	GCAGGTAGATCATCACTGCA	14083	gRNA_ZRANB1_1	TCAGTTCTACAAGCTACCTG	48855	gRNA_USP40_1	GAAAACAGCATGGACCACTG	64514	gRNA_USP17L2_1	TGACATGACCAGGACTGTGG	56472	gRNA_ZRANB1_1	TCAGTTCTACAAGCTACCTG	9179
gRNA_USP26_2	ATAGTGACGGTTACACAAAG	31708	gRNA_USP17L19_2	TACATGTCTCAGACGAACAC	5015	gRNA_USP48_1	TGAGATGCGTAAGCAAAGTG	48182	gRNA_USP25_2	GGCACCAAGGCACATAACGG	64434	gRNA_USP12_2	TTGCGTATAAGAGTCAACCT	56338	gRNA_OTULIN_2	ATTGCTTATACATGAAAGAG	9056
gRNA_USP17L10_3	GGTCTCCTGCTACTCAGAGG	31557	gRNA_USP54_1	ACTGACCACAGACTCATGGT	6568	gRNA_USP17L26_2	TCCAGGGCGATGTCCAGGTA	48092	gRNA_USP35_2	TCAAGGAGGACTCGAACTCG	64344	gRNA_USP30_1	TAAATCAGTACATACCCATG	56212	gRNA_USP29_2	TACATTTAGTAGGCTCTCCA	9010
gRNA_USP21_1	AAGACAGCTCGGAATCGAGT	31536	gRNA_FAM188A_1	GCTGTTTCTAATGTATGGGA	6053	gRNA_USP25_3	GAGACTGAAAGATTACCTCA	48006	gRNA_USP26_3	GAAGCCTAAAAGTGAATTTG	64201	gRNA_USP16_3	GTGTTACGTATGTGATAATG	56092	gRNA_FAM188B2_1	TCACTTACTATGTTTCAGAG	9000
gRNA_Non-Targeting_Control_19	TGCCGTTAGCATGCGATCCC	31427	gRNA_OTUD7B_1	AAGCGTTGAAAAGGCGCTGG	4289	gRNA_USP2_2	ATAGCTACCGGATAGACCCC	47968	gRNA_FAM188A_1	GCTGTTTCTAATGTATGGGA	64037	gRNA_Non-Targeting_Control_5	TTAACTCGAACGCTCGAAAG	55221	gRNA_USP9Y_1	TAACAATACTCATCGCCTAG	8987
gRNA_Non-Targeting_Control_36	TGTGAAAGTTTATGGTGTTA	31414	gRNA_USP10_3	ACAACCGAGAATAAATTCAG	4216	gRNA_USP44_3	TATTGGCCTTCGTTTAACTG	47727	gRNA_USP21_1	AAGACAGCTCGGAATCGAGT	63195	gRNA_ZRANB1_1	TCAGTTCTACAAGCTACCTG	55002	gRNA_JOSD2_3	AGGATCAGCCCCAGTACCTG	8908
gRNA_Non-Targeting_Control_35	CGACAACGTGCAGGTGTATC	31135	gRNA_USP17L12_3	GCAGGTCTCCTGTTACTCAG	3113	gRNA_Non-Targeting_Control_21	TCCGGAGGCTCAAACCAAGT	47710	gRNA_USP54_3	GTGGAGCATTCATCAACACA	62929	gRNA_FAM188A_1	GCTGTTTCTAATGTATGGGA	54590	gRNA_USP12_2	TTGCGTATAAGAGTCAACCT	8768
gRNA_UCHL1_1	AATCGGACTTATTCACGCAG	30874	gRNA_USP24_3	TCTCCAACTAGTATTATGAG	3405	gRNA_USP17L20_1	GATGCTAGAGGCGGTGACCT	47386	gRNA_USP17L21_1	AAAGTTAACATCTTGGAGGC	62871	gRNA_USP6_3	TCTCCGGAACCTGATTGACG	54245	gRNA_USP17L17_2	TCAAAGCTCAAGAAGGCCAA	8705
gRNA_OTUD7A_3	CAGAAAAGCGGCTTTCCCGG	30868	gRNA_FAM63B_3	ACCTTGTACTGCCCTCTCAG	7954	gRNA_USP17L10_3	GGTCTCCTGCTACTCAGAGG	47271	gRNA_USP28_2	AGAAGTGGAAGCCCTATCTG	62702	gRNA_USP34_2	TCATATACCACGATTAACAG	53943	gRNA_USP17L26_2	TCCAGGGCGATGTCCAGGTA	8629
gRNA_USP17L21_1	AAAGTTAACATCTTGGAGGC	30432	gRNA_USP43_3	CTGCAAGGTGGGCATTACAC	22356	gRNA_FAM63A_2	AGGTCAAAGACACTGCACTC	46984	gRNA_UCHL1_1	AATCGGACTTATTCACGCAG	62525	gRNA_BRCC3_1	GAGCGTGGTTGAGACAAACG	53622	gRNA_USP5_2	GGAGAAGTTTGAATTAGACG	8566
gRNA_USP36_3	GATCTGGAATCACACTCGGG	30279	gRNA_USP17L29_1	CTACCTGCTTGTGCCCGGGA	6540	gRNA_UCHL5_2	GTTACTGAACTGTACCCACC	46426	gRNA_BAP1_2	TCTACCCCATTGACCATGGT	62075	gRNA_USP35_1	AGAACTCGGCGAAGACGTCG	53257	gRNA_Non-Targeting_Control_31	TGACGCTCCACGTCCGGACC	8548
gRNA_USP17L30_1	TGTTTGTCTCCAGAGGGCGC	30221	gRNA_USP17L26_3	TCCAAATATTTGGTGGATGA	1712	gRNA_USP9X_2	ACAAGTGCTATATCTAACAG	46315	gRNA_USP26_2	ATAGTGACGGTTACACAAAG	62007	gRNA_ZC3H12A_1	CAGCTCCCTCTAGTCCCGCG	52121	gRNA_USP39_3	AGGCGTGAGACTTCAAACCC	8403
gRNA_USP25_3	GAGACTGAAAGATTACCTCA	30163	gRNA_JOSD1_3	GGACAGCAATGCCTTCACCC	4099	gRNA_OTUD6B_1	AAAGGATTGTGCTCTGACTG	46087	gRNA_OTUD7A_3	CAGAAAAGCGGCTTTCCCGG	61988	gRNA_OTUB2_3	GATTTACCGGAGGAAAATCG	51843	gRNA_VCPIP1_1	GTGTAGCACTACGTCCGGGT	8396
gRNA_USP54_3	GTGGAGCATTCATCAACACA	30038	gRNA_USP8_3	TGAAGTCCGGAAAAAACTTG	5235	gRNA_USP17L28_2	ACACGGGTCTCACATGAGAG	45912	gRNA_Non-Targeting_Control_30	GTTCCCCGGGAAGTCTATGC	61798	gRNA_VCPIP1_3	CCCCTTGGTAGGCATAAAAG	51619	gRNA_USP32_2	GGAAAGAATGCTCCACGTGG	8384
gRNA_USP20_1	GTCGACCTACCAATTGGACA	29983	gRNA_USP17L4_3	GCTGGGTGGAGTTGTCACGA	5064	gRNA_USP17L30_1	TGTTTGTCTCCAGAGGGCGC	45368	gRNA_USP17L28_1	TATGCAAGCTCACATCACAC	61189	gRNA_USP9X_2	ACAAGTGCTATATCTAACAG	51618	gRNA_USP17L24_3	AGCAGGTATTTCCCATATTC	8364
gRNA_USP4_2	TCAACAGAGACAACCCTCTG	29739	gRNA_UCHL1_1	AATCGGACTTATTCACGCAG	6557	gRNA_FAM188A_3	CCATATACAGGATCTATCAA	45339	gRNA_USP25_3	GAGACTGAAAGATTACCTCA	61161	gRNA_USP17L30_3	CCAGCAGCCAATGCCTGTGA	51238	gRNA_USP17L30_3	CCAGCAGCCAATGCCTGTGA	8330
gRNA_Non-Targeting_Control_17	AGTTCCCAGAAATATATTGC	29673	gRNA_USP16_3	GTGTTACGTATGTGATAATG	5096	gRNA_USP17L15_2	ACATGTATAGCTTCATGTCA	45335	gRNA_OTUD7B_3	TAGTGTAATTCTGTCCCTAG	60912	gRNA_USP36_2	GAGCACACGTATGAGAGCTG	50597	gRNA_OTUD6A_1	TGCGCCGCCACCAACGCGAG	8309
gRNA_USP17L15_1	CAAACGTGTCATCGTCACAA	29621	gRNA_BRCC3_2	AGTAATGGGGCTGTGCATAG	13107	gRNA_USP31_2	GGCAACGCCAGGCATCATCG	44587	gRNA_USP10_1	ACTGACCAAAATCAGCCCCG	60607	gRNA_USP17L24_2	TCTGAGCTGCCTGGATATCC	50481	gRNA_USP17L4_3	GCTGGGTGGAGTTGTCACGA	8300
gRNA_USP47_2	TGATCGAATGACATTTCCCG	29610	gRNA_USP17L30_3	CCAGCAGCCAATGCCTGTGA	4678	gRNA_USP22_1	CCTCGAACTGCACCATAGGT	44521	gRNA_USP36_3	GATCTGGAATCACACTCGGG	60359	gRNA_OTUD6A_1	TGCGCCGCCACCAACGCGAG	50204	gRNA_USP17L27_3	TTGCCAACTACATGCTGTCC	8281
gRNA_CYLD_2	ATATTCAAGATCGTTCTGTG	29573	gRNA_OTUD6A_3	GGCCGGCTTCAAGCGCGAGG	4827	gRNA_USP17L17_2	TCAAAGCTCAAGAAGGCCAA	43886	gRNA_USP17L15_1	CAAACGTGTCATCGTCACAA	59765	gRNA_CYLD_3	TGAGACTGAATGGTAAAGAG	50204	gRNA_USP17L18_2	CCTTGTTCCAGTCGACATGG	8109
gRNA_USP28_2	AGAAGTGGAAGCCCTATCTG	29484	gRNA_USP22_3	TGGGGCTCTGCATCTCACAG	9356	gRNA_JOSD2_3	AGGATCAGCCCCAGTACCTG	43712	gRNA_USP51_2	TTGATGAGAAACATCTGTTG	59554	gRNA_USP5_2	GGAGAAGTTTGAATTAGACG	50030	gRNA_USP17L10_3	GGTCTCCTGCTACTCAGAGG	8100
gRNA_OTUD7B_3	TAGTGTAATTCTGTCCCTAG	29459	gRNA_USP7_2	GGCAACCTTTCAGTTCACTG	2144	gRNA_USP9X_1	TCATACTATACTCATCGACA	43561	gRNA_OTUD5_1	GGTTGTGCGAAAGCATTGCA	59303	gRNA_USP25_3	GAGACTGAAAGATTACCTCA	49445	gRNA_USP17L12_3	GCAGGTCTCCTGTTACTCAG	8091
gRNA_JOSD2_1	TCACCTCTTGCAGATCTCAT	29346	gRNA_BRCC3_3	GCTCTGGAGAAATTTCTACT	16326	gRNA_Non-Targeting_Control_4	AAATTGGCTTTCGTTCGTGC	43227	gRNA_USP47_2	TGATCGAATGACATTTCCCG	59279	gRNA_USP17L1_1	TCAAAGCTCAAGAAGTCCAG	49406	gRNA_OTUD7A_2	TCTCTGTTCCATGGACACAA	8081
gRNA_OTUD1_1	GCTCTTCGCCCCACGGACCG	29292	gRNA_OTUD1_3	CTCCGCCGCACTACTCGGGG	9196	gRNA_USP35_1	AGAACTCGGCGAAGACGTCG	42719	gRNA_OTUD1_1	GCTCTTCGCCCCACGGACCG	59199	gRNA_OTUD6A_3	GGCCGGCTTCAAGCGCGAGG	48838	gRNA_USP27X_1	TAAACCGATCGTAAAGCTGG	8033
gRNA_USP46_2	TGGCAACATGAACGAACCTG	29197	gRNA_USP40_2	CATGGTACAGACGATAGATG	9879	gRNA_USP19_1	GAGGAATGACTCTTTCATCG	42123	gRNA_Non-Targeting_Control_36	TGTGAAAGTTTATGGTGTTA	59141	gRNA_STAMBPL1_2	AAGAAGCAAGAGTTAGCCCG	48782	gRNA_USP24_1	AGACACGGACAACTGTCGGT	7937
gRNA_USP10_1	ACTGACCAAAATCAGCCCCG	29144	gRNA_COPS6_1	GGTTCAACTTCAGAAAGAGG	1071	gRNA_OTUB2_3	GATTTACCGGAGGAAAATCG	41970	gRNA_USP32_1	GAATGCACATGACACCACAA	59061	gRNA_JOSD2_1	TCACCTCTTGCAGATCTCAT	48471	gRNA_USP40_3	TCGAGCTAATCCAAGATATG	7679
gRNA_Non-Targeting_Control_30	GTTCCCCGGGAAGTCTATGC	29001	gRNA_USP17L2_1	TGACATGACCAGGACTGTGG	4636	gRNA_STAMBP_1	AATCGATGGATTGCGCCATG	41906	gRNA_USP17L26_2	TCCAGGGCGATGTCCAGGTA	58942	gRNA_USP17L29_2	TGACGTGGCCAGGATTGTGG	48340	gRNA_USP17L11_2	TTGGCTGCTGGCTTCCATAG	7572
gRNA_USP32_1	GAATGCACATGACACCACAA	28864	gRNA_ATXN3L_1	TGGAACATCAGACCAAGATG	9496	gRNA_USP17L29_1	CTACCTGCTTGTGCCCGGGA	41812	gRNA_USP8_2	GTATTTCATATATAGTACAT	58647	gRNA_MYSM1_1	CAAGCTCAGAAATTACACTG	48081	gRNA_Non-Targeting_Control_3	AAATAATATGCATCTCTCGA	7538
gRNA_USP11_3	GTGGGCGAGAACGTCCACTG	28679	gRNA_USP17L26_2	TCCAGGGCGATGTCCAGGTA	3075	gRNA_USP25_2	GGCACCAAGGCACATAACGG	41369	gRNA_USP17L30_1	TGTTTGTCTCCAGAGGGCGC	58352	gRNA_USP29_2	TACATTTAGTAGGCTCTCCA	47925	gRNA_USP24_2	GTTTAATCCTACCTGTACCA	7472
gRNA_USP36_2	GAGCACACGTATGAGAGCTG	28671	gRNA_USP6_1	CCAACGGACCTGGATATAGG	12084	gRNA_USP19_3	GAGCGAGGCGGGCATAAGTG	41057	gRNA_USP36_2	GAGCACACGTATGAGAGCTG	58132	gRNA_USP17L17_2	TCAAAGCTCAAGAAGGCCAA	47778	gRNA_USP25_3	GAGACTGAAAGATTACCTCA	7357
gRNA_USP17L12_2	GAGTAAAGTTAACATCTTGG	28667	gRNA_USP30_2	TGTGTGTGACAACTGTACAA	5470	gRNA_USP3_2	CTACACTTGGAACTTCAGGG	40912	gRNA_USP11_3	GTGGGCGAGAACGTCCACTG	58082	gRNA_YOD1_1	GCGGAGCCGCCACATCGTGT	47709	gRNA_USP36_3	GATCTGGAATCACACTCGGG	7311
gRNA_USP17L28_1	TATGCAAGCTCACATCACAC	28624	gRNA_USP16_2	TTAAGACACAGCCAAACTGA	2798	gRNA_COPS5_1	AGCAGCCTGAGCATTTACTC	40597	gRNA_USP9X_3	TCATGGCGATAAAACACATG	58047	gRNA_UCHL1_1	AATCGGACTTATTCACGCAG	47620	gRNA_USP8_3	TGAAGTCCGGAAAAAACTTG	7263
gRNA_USP9X_3	TCATGGCGATAAAACACATG	28574	gRNA_COPS5_3	GGGTGGTATCATAGCCACCC	3977	gRNA_USP45_1	AATGAATGGATCTTTCACCG	40291	gRNA_CYLD_2	ATATTCAAGATCGTTCTGTG	57955	gRNA_USP24_1	AGACACGGACAACTGTCGGT	47563	gRNA_OTUD3_2	GTGACCTACCTGCCACAAAG	7256
gRNA_USP17L17_2	TCAAAGCTCAAGAAGGCCAA	28466	gRNA_USP17L21_2	AACTTTACTCACCTCTGCCA	2662	gRNA_USP36_2	GAGCACACGTATGAGAGCTG	40290	gRNA_Non-Targeting_Control_34	GTTGATCGAAAATGGGAGAA	57856	gRNA_USP32_2	GGAAAGAATGCTCCACGTGG	47547	gRNA_USP15_3	AAGGTGTTCCTTAAGTGACT	7168
gRNA_STAMBPL1_2	AAGAAGCAAGAGTTAGCCCG	28326	gRNA_USP45_3	AGATTAATTATAATACAATG	2082	gRNA_Non-Targeting_Control_3	AAATAATATGCATCTCTCGA	39840	gRNA_Non-Targeting_Control_8	ATCTGCCATGGCGTCCTGGC	57535	gRNA_MYSM1_2	GAGATGTTAATTGTATTGGA	47533	gRNA_USP10_2	AAATAGCTGTAATATCCAGG	7149
gRNA_USP8_2	GTATTTCATATATAGTACAT	28242	gRNA_USP26_1	GGACAGAGTTCATCAAAACG	7927	gRNA_STAMBPL1_2	AAGAAGCAAGAGTTAGCCCG	39627	gRNA_USP17L17_2	TCAAAGCTCAAGAAGGCCAA	57455	gRNA_COPS6_2	CAAGGAATATTATTACACCA	47285	gRNA_UCHL5_2	GTTACTGAACTGTACCCACC	7088
gRNA_Non-Targeting_Control_34	GTTGATCGAAAATGGGAGAA	28034	gRNA_Non-Targeting_Control_23	TTATGTGAGCACGCCATTAC	12818	gRNA_BAP1_1	GTCCATCAAGACTAGCAGCG	39535	gRNA_USP4_2	TCAACAGAGACAACCCTCTG	57263	gRNA_OTUD3_2	GTGACCTACCTGCCACAAAG	47239	gRNA_USP38_2	GAAGCCTCAAAGAATATCCG	7087
gRNA_BRCC3_1	GAGCGTGGTTGAGACAAACG	27999	gRNA_USP27X_2	ACTGCTTGCGGAGGTTTACG	11004	gRNA_OTUD6A_3	GGCCGGCTTCAAGCGCGAGG	39413	gRNA_Non-Targeting_Control_32	GAGTCGAAGATGGTCTAGGA	57222	gRNA_BAP1_2	TCTACCCCATTGACCATGGT	46832	gRNA_USP54_3	GTGGAGCATTCATCAACACA	7061
gRNA_USP17L21_2	AACTTTACTCACCTCTGCCA	27948	gRNA_USP17L3_2	CTACCTGCTTGTGGCCGGGA	8739	gRNA_USP17L4_2	TATGCAAGCTCACATCACAT	38598	gRNA_USP17L3_1	AACTTTACACACTTCTGCCA	57077	gRNA_USP8_3	TGAAGTCCGGAAAAAACTTG	46639	gRNA_OTUD6B_1	AAAGGATTGTGCTCTGACTG	7009
gRNA_USP17L26_2	TCCAGGGCGATGTCCAGGTA	27859	gRNA_USP10_2	AAATAGCTGTAATATCCAGG	3976	gRNA_USP24_2	GTTTAATCCTACCTGTACCA	38210	gRNA_USP33_1	AACAGTCGACTTAAACAACC	57000	gRNA_USP21_1	AAGACAGCTCGGAATCGAGT	46435	gRNA_YOD1_1	GCGGAGCCGCCACATCGTGT	6944
gRNA_Non-Targeting_Control_8	ATCTGCCATGGCGTCCTGGC	27795	gRNA_USP17L24_1	GACCTGCTGCGGTGGGGGCT	3265	gRNA_USP17L29_2	TGACGTGGCCAGGATTGTGG	37696	gRNA_USP54_2	AAGGTTTACCTAAAGCACCA	56604	gRNA_JOSD1_1	TCTACCATGAGAAACAGCGC	46382	gRNA_JOSD1_3	GGACAGCAATGCCTTCACCC	6909
gRNA_Non-Targeting_Control_13	AAGCCATTGTATAACTCCAG	27782	gRNA_USP17L11_2	TTGGCTGCTGGCTTCCATAG	3074	gRNA_YOD1_1	GCGGAGCCGCCACATCGTGT	37300	gRNA_BRCC3_1	GAGCGTGGTTGAGACAAACG	56596	gRNA_Non-Targeting_Control_37	GCGAATGCCTGAAAGTATAA	46103	gRNA_MYSM1_2	GAGATGTTAATTGTATTGGA	6901
gRNA_USP17L3_1	AACTTTACACACTTCTGCCA	27775	gRNA_YOD1_2	AGTGTGTACTATGTCGTCGA	6029	gRNA_ZRANB1_3	GAGTCCCGCTTCGTAGCAGG	37279	gRNA_Non-Targeting_Control_13	AAGCCATTGTATAACTCCAG	56518	gRNA_OTUD5_1	GGTTGTGCGAAAGCATTGCA	46075	gRNA_USP17L17_3	GCATAGAGGACATAGACAAG	6889
gRNA_UCHL3_3	GGTCTCATGAGTAACTCGGA	27745	gRNA_ATXN3_2	CTGTCATCCATATTTCCAGA	7322	gRNA_USP36_3	GATCTGGAATCACACTCGGG	37024	gRNA_Non-Targeting_Control_17	AGTTCCCAGAAATATATTGC	56502	gRNA_Non-Targeting_Control_27	TAAAGCAGAAGAATATACAG	45692	gRNA_BAP1_2	TCTACCCCATTGACCATGGT	6859
gRNA_CYLD_3	TGAGACTGAATGGTAAAGAG	27740	gRNA_USP17L19_3	CCTGTGAGGGCTGGATGACG	4974	gRNA_JOSD2_1	TCACCTCTTGCAGATCTCAT	36303	gRNA_USP10_3	ACAACCGAGAATAAATTCAG	56021	gRNA_USP27X_1	TAAACCGATCGTAAAGCTGG	45446	gRNA_ZC3H12A_1	CAGCTCCCTCTAGTCCCGCG	6849
gRNA_USP33_3	TCATCAAATACGGCAACCAG	27715	gRNA_FAM188A_2	TTGGACCAGTATTCAATGTG	10526	gRNA_PSMD14_3	TACCAACCAACAACCATCTC	36165	gRNA_USP16_2	TTAAGACACAGCCAAACTGA	55622	gRNA_USP51_3	TCCATGCAGAACATTTAGCA	45410	gRNA_USP35_1	AGAACTCGGCGAAGACGTCG	6807
gRNA_Non-Targeting_Control_32	GAGTCGAAGATGGTCTAGGA	27691	gRNA_USP2_3	TCTGGATGGGCTCCATAACG	8859	gRNA_USP17L19_3	CCTGTGAGGGCTGGATGACG	36144	gRNA_VCPIP1_3	CCCCTTGGTAGGCATAAAAG	55290	gRNA_USP33_3	TCATCAAATACGGCAACCAG	45156	gRNA_USP32_1	GAATGCACATGACACCACAA	6790
gRNA_USP37_1	AGGGTTGCTAGAAAATCGGT	27661	gRNA_USP4_2	TCAACAGAGACAACCCTCTG	7340	gRNA_USP47_2	TGATCGAATGACATTTCCCG	35964	gRNA_USP17L21_2	AACTTTACTCACCTCTGCCA	55053	gRNA_USP24_2	GTTTAATCCTACCTGTACCA	45089	gRNA_UCHL3_1	GGATCCTGAACTCCTTAGCA	6772
gRNA_VCPIP1_3	CCCCTTGGTAGGCATAAAAG	27623	gRNA_USP17L21_3	GAGTAACAGGAGACCTGCTG	4165	gRNA_MPND_3	ACAAGAGTCGGAGACCACTG	35914	gRNA_STAMBPL1_2	AAGAAGCAAGAGTTAGCCCG	54878	gRNA_Non-Targeting_Control_3	AAATAATATGCATCTCTCGA	44611	gRNA_USP33_3	TCATCAAATACGGCAACCAG	6681
gRNA_JOSD1_3	GGACAGCAATGCCTTCACCC	27577	gRNA_CYLD_3	TGAGACTGAATGGTAAAGAG	5084	gRNA_COPS5_3	GGGTGGTATCATAGCCACCC	35643	gRNA_OTULIN_3	TGAACTATTCACAAATGAGG	54858	gRNA_VCPIP1_1	GTGTAGCACTACGTCCGGGT	44355	gRNA_USP17L1_1	TCAAAGCTCAAGAAGTCCAG	6670
gRNA_OTUD5_1	GGTTGTGCGAAAGCATTGCA	27531	gRNA_USP17L3_3	GCCAGAAGCCAATGCCTGTG	8375	gRNA_USP17L18_1	GAGGACGACTCACTCTACTT	35174	gRNA_USP33_3	TCATCAAATACGGCAACCAG	54765	gRNA_OTUD7A_3	CAGAAAAGCGGCTTTCCCGG	44279	gRNA_VCPIP1_2	CAGTCTGATGCAATATAGTG	6657
gRNA_TNFAIP3_2	TATGCCATGAGTGCTCAGAG	27237	gRNA_MYSM1_1	CAAGCTCAGAAATTACACTG	3910	gRNA_OTUD5_3	CGGCGCAGGCTACAACAGTG	34774	gRNA_TNFAIP3_2	TATGCCATGAGTGCTCAGAG	54743	gRNA_USP10_2	AAATAGCTGTAATATCCAGG	43212	gRNA_USP17L19_2	TACATGTCTCAGACGAACAC	6546
gRNA_USP40_3	TCGAGCTAATCCAAGATATG	27113	gRNA_USP13_3	GCCAGGACTAAGTTAGGACA	10580	gRNA_USP51_3	TCCATGCAGAACATTTAGCA	34664	gRNA_USP29_2	TACATTTAGTAGGCTCTCCA	54558	gRNA_COPS5_2	GATGGGTCTGATGCTAGGAA	42530	gRNA_USP17L18_3	GACGACTCACTCTACTTGGG	6515
gRNA_USP16_2	TTAAGACACAGCCAAACTGA	27051	gRNA_USP38_1	GCTGATTATGAGCTGTCCGT	9268	gRNA_USP24_1	AGACACGGACAACTGTCGGT	34533	gRNA_USP38_3	TCTCTATGAACCTATTCTGG	54265	gRNA_USP17L10_3	GGTCTCCTGCTACTCAGAGG	42495	gRNA_COPS6_3	TGGGTTGGTATACCACAGGG	6465
gRNA_OTUD6A_3	GGCCGGCTTCAAGCGCGAGG	27029	gRNA_OTUD4_2	TTACCTGTACATAAGAGAAA	1992	gRNA_USP17L5_3	GTGTAAAGTTAACGTCTTGG	34185	gRNA_OTUD6A_3	GGCCGGCTTCAAGCGCGAGG	53854	gRNA_USP3_2	CTACACTTGGAACTTCAGGG	42375	gRNA_USP17L22_2	TACATGTCTCAGCAGAACAC	6424
gRNA_USP38_3	TCTCTATGAACCTATTCTGG	26613	gRNA_USP31_3	GACTTATTACCTGATCAGTG	8792	gRNA_OTUB1_2	CAGACACAGCCTTGAACCTG	33284	gRNA_USP9Y_3	TGATGGTCCCAATCTAGAGG	53659	gRNA_YOD1_3	GAGGATTCGCTGACCGCCGG	41646	gRNA_FAM188A_1	GCTGTTTCTAATGTATGGGA	6354
gRNA_USP10_3	ACAACCGAGAATAAATTCAG	26496	gRNA_USP21_3	GAGAAGGGACTTCCGGCAAG	10044	gRNA_USP21_1	AAGACAGCTCGGAATCGAGT	33238	gRNA_USP40_3	TCGAGCTAATCCAAGATATG	53365	gRNA_USP36_3	GATCTGGAATCACACTCGGG	41561	gRNA_UCHL3_2	GCCGCTGGAGGCCAATCCCG	6288
gRNA_USP9Y_3	TGATGGTCCCAATCTAGAGG	26276	gRNA_USP31_2	GGCAACGCCAGGCATCATCG	6524	gRNA_CYLD_3	TGAGACTGAATGGTAAAGAG	32621	gRNA_JOSD1_3	GGACAGCAATGCCTTCACCC	53292	gRNA_USP42_1	AAATATCTGACAAACAAGAG	41293	gRNA_USP17L27_2	CCCTTACCTGGACATCGCCC	6222
gRNA_USP33_1	AACAGTCGACTTAAACAACC	26211	gRNA_Non-Targeting_Control_34	GTTGATCGAAAATGGGAGAA	8761	gRNA_USP17L30_2	CGTGGACCAGCACAGCATAG	32464	gRNA_OTUD6B_1	AAAGGATTGTGCTCTGACTG	53205	gRNA_USP10_1	ACTGACCAAAATCAGCCCCG	41169	gRNA_JOSD2_1	TCACCTCTTGCAGATCTCAT	6189
gRNA_USP17L15_3	GACAGAAGTGATGCTAGAGG	26201	gRNA_OTUD5_1	GGTTGTGCGAAAGCATTGCA	5346	gRNA_USP17L21_3	GAGTAACAGGAGACCTGCTG	31774	gRNA_BAP1_1	GTCCATCAAGACTAGCAGCG	53121	gRNA_USP16_1	AAGGAAAGATTCATGAACCA	41122	gRNA_USP30_1	TAAATCAGTACATACCCATG	6106
gRNA_OTUD6B_1	AAAGGATTGTGCTCTGACTG	26024	gRNA_COPS6_3	TGGGTTGGTATACCACAGGG	5321	gRNA_USP32_1	GAATGCACATGACACCACAA	31721	gRNA_USP37_1	AGGGTTGCTAGAAAATCGGT	53080	gRNA_OTUD4_1	TCTTCAATACAGGAATGGGT	41116	gRNA_USP16_3	GTGTTACGTATGTGATAATG	6001
gRNA_USP27X_1	TAAACCGATCGTAAAGCTGG	25966	gRNA_USP17L2_3	ATTGCGGTCTTTGTCTCCAG	3625	gRNA_VCPIP1_3	CCCCTTGGTAGGCATAAAAG	30570	gRNA_COPS6_1	GGTTCAACTTCAGAAAGAGG	52986	gRNA_USP32_1	GAATGCACATGACACCACAA	40825	gRNA_USP21_1	AAGACAGCTCGGAATCGAGT	5987
gRNA_BAP1_1	GTCCATCAAGACTAGCAGCG	25962	gRNA_Non-Targeting_Control_30	GTTCCCCGGGAAGTCTATGC	10854	gRNA_Non-Targeting_Control_37	GCGAATGCCTGAAAGTATAA	30175	gRNA_USP17L12_2	GAGTAAAGTTAACATCTTGG	52776	gRNA_USP17L19_3	CCTGTGAGGGCTGGATGACG	40554	gRNA_MYSM1_1	CAAGCTCAGAAATTACACTG	5984
gRNA_USP32_2	GGAAAGAATGCTCCACGTGG	25947	gRNA_USP17L21_1	AAAGTTAACATCTTGGAGGC	8114	gRNA_OTUD3_1	AGCACTACGACAGTGTTCGG	30154	gRNA_CYLD_3	TGAGACTGAATGGTAAAGAG	52776	gRNA_USP30_3	AGGTGTTCCCTAAATTAACA	40493	gRNA_USP10_1	ACTGACCAAAATCAGCCCCG	5982
gRNA_USP16_1	AAGGAAAGATTCATGAACCA	25813	gRNA_USP30_3	AGGTGTTCCCTAAATTAACA	1724	gRNA_USP16_1	AAGGAAAGATTCATGAACCA	30026	gRNA_USP2_2	ATAGCTACCGGATAGACCCC	52723	gRNA_ZRANB1_3	GAGTCCCGCTTCGTAGCAGG	39549	gRNA_USP5_3	ATGGATGCAGCCCTTAACAA	5963
gRNA_MPND_1	AGTCTGACCTGGCCAAGTCG	25657	gRNA_USP29_1	ACTCACTCAAGGTGTCCCAT	12870	gRNA_Non-Targeting_Control_27	TAAAGCAGAAGAATATACAG	28851	gRNA_USP32_2	GGAAAGAATGCTCCACGTGG	52473	gRNA_USP17L28_3	GCATAGAGGACATAGACGAG	39161	gRNA_JOSD1_1	TCTACCATGAGAAACAGCGC	5948
gRNA_OTULIN_3	TGAACTATTCACAAATGAGG	25650	gRNA_PAN2_2	CTCAAGTATATGGCCCGTGG	11190	gRNA_USP38_2	GAAGCCTCAAAGAATATCCG	28545	gRNA_Non-Targeting_Control_27	TAAAGCAGAAGAATATACAG	52314	gRNA_USP17L27_3	TTGCCAACTACATGCTGTCC	39138	gRNA_USP47_2	TGATCGAATGACATTTCCCG	5901
gRNA_Non-Targeting_Control_9	GTCCTCATCCGGTCAGGCTG	25482	gRNA_PSMD14_1	AAACACATCAATCACTCTGA	3859	gRNA_MYSM1_3	ATGGTGTTATCCAAGGTCCA	28349	gRNA_USP17L15_3	GACAGAAGTGATGCTAGAGG	52278	gRNA_USP17L24_1	GACCTGCTGCGGTGGGGGCT	39028	gRNA_USP3_2	CTACACTTGGAACTTCAGGG	5804
gRNA_USP2_2	ATAGCTACCGGATAGACCCC	25430	gRNA_FAM63A_2	AGGTCAAAGACACTGCACTC	4794	gRNA_USP1_1	GGCGACTGCTTAACACACTG	27627	gRNA_YOD1_2	AGTGTGTACTATGTCGTCGA	51880	gRNA_FAM63A_1	AGTCATCCCTGAAAACCATG	38797	gRNA_USP16_1	AAGGAAAGATTCATGAACCA	5745
gRNA_Non-Targeting_Control_27	TAAAGCAGAAGAATATACAG	25361	gRNA_USP17L17_2	TCAAAGCTCAAGAAGGCCAA	5150	gRNA_USP39_3	AGGCGTGAGACTTCAAACCC	27220	gRNA_Non-Targeting_Control_9	GTCCTCATCCGGTCAGGCTG	51667	gRNA_UCHL3_2	GCCGCTGGAGGCCAATCCCG	38473	gRNA_USP17L22_1	AGTGAACATGAGAAATTCAT	5565
gRNA_USP17L1_1	TCAAAGCTCAAGAAGTCCAG	25229	gRNA_USP17L24_2	TCTGAGCTGCCTGGATATCC	2297	gRNA_VCPIP1_1	GTGTAGCACTACGTCCGGGT	27022	gRNA_USP17L25_2	TGAATTTCTCATGTTCACTG	51008	gRNA_USP16_2	TTAAGACACAGCCAAACTGA	38197	gRNA_COPS5_2	GATGGGTCTGATGCTAGGAA	5526
gRNA_USP54_2	AAGGTTTACCTAAAGCACCA	24979	gRNA_JOSD2_1	TCACCTCTTGCAGATCTCAT	4368	gRNA_USP8_3	TGAAGTCCGGAAAAAACTTG	26811	gRNA_USP16_1	AAGGAAAGATTCATGAACCA	51006	gRNA_USP54_3	GTGGAGCATTCATCAACACA	37451	gRNA_PAN2_1	GTTCCACCTTAAAAGTACGG	5501
gRNA_USP7_1	AGATGTATGATCCCAAAACG	24940	gRNA_UCHL3_2	GCCGCTGGAGGCCAATCCCG	3253	gRNA_USP17L18_3	GACGACTCACTCTACTTGGG	26542	gRNA_FAM63A_1	AGTCATCCCTGAAAACCATG	50950	gRNA_USP9X_3	TCATGGCGATAAAACACATG	37415	gRNA_USP33_1	AACAGTCGACTTAAACAACC	5487
gRNA_MYSM1_2	GAGATGTTAATTGTATTGGA	24641	gRNA_USP46_1	GTTCATATACCTTAGACAGT	10007	gRNA_USP33_1	AACAGTCGACTTAAACAACC	26417	gRNA_ZC3H12A_2	GGAGTGGAAGCGCTTCATCG	50827	gRNA_USP24_3	TCTCCAACTAGTATTATGAG	36914	gRNA_USP7_2	GGCAACCTTTCAGTTCACTG	5487
gRNA_USP16_3	GTGTTACGTATGTGATAATG	24175	gRNA_USP17L27_3	TTGCCAACTACATGCTGTCC	4047	gRNA_JOSD1_3	GGACAGCAATGCCTTCACCC	26039	gRNA_USP17L11_2	TTGGCTGCTGGCTTCCATAG	50776	gRNA_USP17L17_3	GCATAGAGGACATAGACAAG	35774	gRNA_USP17L30_1	TGTTTGTCTCCAGAGGGCGC	5466
gRNA_USP17L13_3	ATGAGGGTGGTGTCCTTAGA	24161	gRNA_Non-Targeting_Control_10	TCGCGCTTGGGTTATACGCT	12989	gRNA_USP24_3	TCTCCAACTAGTATTATGAG	25771	gRNA_MPND_1	AGTCTGACCTGGCCAAGTCG	50542	gRNA_USP17L22_2	TACATGTCTCAGCAGAACAC	35441	gRNA_UCHL5_3	GAATTAGATGGATTAAGAGA	5290
gRNA_COPS6_1	GGTTCAACTTCAGAAAGAGG	24109	gRNA_USP17L15_1	CAAACGTGTCATCGTCACAA	2816	gRNA_USP17L19_2	TACATGTCTCAGACGAACAC	25727	gRNA_USP17L20_2	CCAAGTGCTCGTCCAACTCG	50384	gRNA_USP17L26_2	TCCAGGGCGATGTCCAGGTA	35373	gRNA_USP17L4_2	TATGCAAGCTCACATCACAT	5255
gRNA_Non-Targeting_Control_24	GTGCGTGAGTATTAACGCTC	24029	gRNA_UCHL5_1	TTTATTATTTCAGGTTGCCG	9578	gRNA_OTULIN_2	ATTGCTTATACATGAAAGAG	25714	gRNA_OTUD3_2	GTGACCTACCTGCCACAAAG	50158	gRNA_USP17L12_3	GCAGGTCTCCTGTTACTCAG	34877	gRNA_USP30_3	AGGTGTTCCCTAAATTAACA	5194
gRNA_USP5_2	GGAGAAGTTTGAATTAGACG	24021	gRNA_USP21_1	AAGACAGCTCGGAATCGAGT	5960	gRNA_OTUD5_1	GGTTGTGCGAAAGCATTGCA	25417	gRNA_UCHL3_3	GGTCTCATGAGTAACTCGGA	50053	gRNA_USP17L19_2	TACATGTCTCAGACGAACAC	34628	gRNA_USP17L25_1	AAGAGATTCTCCGATGTCAC	5149
gRNA_USP17L25_2	TGAATTTCTCATGTTCACTG	24021	gRNA_USP31_1	CAAACCTGAATGCAAACCGT	12958	gRNA_USP5_3	ATGGATGCAGCCCTTAACAA	25137	gRNA_UCHL3_2	GCCGCTGGAGGCCAATCCCG	49811	gRNA_USP17L25_1	AAGAGATTCTCCGATGTCAC	33982	gRNA_STAMBPL1_2	AAGAAGCAAGAGTTAGCCCG	5095
gRNA_USP29_2	TACATTTAGTAGGCTCTCCA	24009	gRNA_USP13_2	CTGGAGCATTACAGAGACAT	16574	gRNA_USP7_1	AGATGTATGATCCCAAAACG	25114	gRNA_USP7_1	AGATGTATGATCCCAAAACG	49781	gRNA_USP38_3	TCTCTATGAACCTATTCTGG	33847	gRNA_FAM63A_1	AGTCATCCCTGAAAACCATG	5071
gRNA_ZRANB1_3	GAGTCCCGCTTCGTAGCAGG	23898	gRNA_Non-Targeting_Control_4	AAATTGGCTTTCGTTCGTGC	6677	gRNA_OTUB1_3	GTAGACCACAAGGTAGTCGG	24534	gRNA_Non-Targeting_Control_24	GTGCGTGAGTATTAACGCTC	49752	gRNA_USP5_3	ATGGATGCAGCCCTTAACAA	33844	gRNA_YOD1_3	GAGGATTCGCTGACCGCCGG	5050
gRNA_USP3_2	CTACACTTGGAACTTCAGGG	23895	gRNA_OTUB1_1	GCAGGACCGAATTCAGCAAG	10994	gRNA_USP17L3_1	AACTTTACACACTTCTGCCA	24330	gRNA_MYSM1_2	GAGATGTTAATTGTATTGGA	49503	gRNA_USP38_2	GAAGCCTCAAAGAATATCCG	33001	gRNA_USP18_3	TCAGGTGTTCGTAATGAATG	5025
gRNA_UCHL3_2	GCCGCTGGAGGCCAATCCCG	23891	gRNA_USP17L13_1	CAGGAACCAAATCATCACAG	2478	gRNA_USP17L24_1	GACCTGCTGCGGTGGGGGCT	23928	gRNA_USP27X_1	TAAACCGATCGTAAAGCTGG	49157	gRNA_USP17L30_1	TGTTTGTCTCCAGAGGGCGC	32999	gRNA_USP9X_2	ACAAGTGCTATATCTAACAG	4988
gRNA_ZC3H12A_2	GGAGTGGAAGCGCTTCATCG	23867	gRNA_USP39_3	AGGCGTGAGACTTCAAACCC	2426	gRNA_OTUD6A_1	TGCGCCGCCACCAACGCGAG	23585	gRNA_USP17L1_1	TCAAAGCTCAAGAAGTCCAG	48984	gRNA_UCHL5_3	GAATTAGATGGATTAAGAGA	32987	gRNA_OTUD4_1	TCTTCAATACAGGAATGGGT	4978
gRNA_YOD1_2	AGTGTGTACTATGTCGTCGA	23790	gRNA_USP17L13_3	ATGAGGGTGGTGTCCTTAGA	6890	gRNA_USP7_3	GGCAGTAGAACAGCTCGATG	23074	gRNA_FAM188B_1	AAGATGCTCAGAGACTACAC	48705	gRNA_USP37_1	AGGGTTGCTAGAAAATCGGT	32687	gRNA_COPS5_1	AGCAGCCTGAGCATTTACTC	4965
gRNA_FAM188B2_1	TCACTTACTATGTTTCAGAG	23601	gRNA_USP44_3	TATTGGCCTTCGTTTAACTG	6875	gRNA_USP17L2_3	ATTGCGGTCTTTGTCTCCAG	22991	gRNA_USP16_3	GTGTTACGTATGTGATAATG	48664	gRNA_USP17L27_2	CCCTTACCTGGACATCGCCC	32653	gRNA_COPS6_2	CAAGGAATATTATTACACCA	4951
gRNA_FAM63A_1	AGTCATCCCTGAAAACCATG	23550	gRNA_USP19_2	CAGATACAGACTGTGTGGTG	20765	gRNA_UCHL3_2	GCCGCTGGAGGCCAATCCCG	22976	gRNA_USP17L13_3	ATGAGGGTGGTGTCCTTAGA	47963	gRNA_USP47_2	TGATCGAATGACATTTCCCG	32631	gRNA_USP9X_3	TCATGGCGATAAAACACATG	4910
gRNA_USP9Y_1	TAACAATACTCATCGCCTAG	23226	gRNA_USP54_3	GTGGAGCATTCATCAACACA	5186	gRNA_OTUD4_3	GAACAGAGAGAAATTTGAAG	22637	gRNA_USP3_2	CTACACTTGGAACTTCAGGG	47795	gRNA_COPS5_1	AGCAGCCTGAGCATTTACTC	32431	gRNA_UCHL1_1	AATCGGACTTATTCACGCAG	4894
gRNA_UCHL5_3	GAATTAGATGGATTAAGAGA	23048	gRNA_FAM188B4_3	TTATTTCACATAAGTTGCCA	6755	gRNA_USP10_2	AAATAGCTGTAATATCCAGG	22581	gRNA_USP17L12_1	TACATGTCTCAGCCGAACAC	47607	gRNA_USP39_3	AGGCGTGAGACTTCAAACCC	31815	gRNA_FAM188B_1	AAGATGCTCAGAGACTACAC	4708
gRNA_OTUD3_2	GTGACCTACCTGCCACAAAG	23002	gRNA_USP51_3	TCCATGCAGAACATTTAGCA	4113	gRNA_UCHL3_3	GGTCTCATGAGTAACTCGGA	22467	gRNA_UCHL5_3	GAATTAGATGGATTAAGAGA	47579	gRNA_USP17L20_1	GATGCTAGAGGCGGTGACCT	31298	gRNA_PSMD14_3	TACCAACCAACAACCATCTC	4673
gRNA_USP17L11_2	TTGGCTGCTGGCTTCCATAG	22869	gRNA_USP22_2	GCCATTGATCTGATGTACGG	14290	gRNA_USP39_2	ACTGCCTGAAGCATCTCATG	22345	gRNA_USP9Y_1	TAACAATACTCATCGCCTAG	47327	gRNA_USP50_3	GTGAGAAAGTATTCCACCAG	31106	gRNA_OTUD7A_3	CAGAAAAGCGGCTTTCCCGG	4669
gRNA_OTULIN_2	ATTGCTTATACATGAAAGAG	22855	gRNA_USP17L18_1	GAGGACGACTCACTCTACTT	5764	gRNA_USP16_3	GTGTTACGTATGTGATAATG	22094	gRNA_ZRANB1_3	GAGTCCCGCTTCGTAGCAGG	47298	gRNA_USP17L4_2	TATGCAAGCTCACATCACAT	30867	gRNA_USP50_3	GTGAGAAAGTATTCCACCAG	4631
gRNA_Non-Targeting_Control_3	AAATAATATGCATCTCTCGA	22843	gRNA_USP40_1	GAAAACAGCATGGACCACTG	9201	gRNA_OTULIN_3	TGAACTATTCACAAATGAGG	21725	gRNA_Non-Targeting_Control_3	AAATAATATGCATCTCTCGA	47208	gRNA_OTUD7A_2	TCTCTGTTCCATGGACACAA	30566	gRNA_MPND_3	ACAAGAGTCGGAGACCACTG	4606
gRNA_USP24_3	TCTCCAACTAGTATTATGAG	22635	gRNA_BAP1_2	TCTACCCCATTGACCATGGT	5947	gRNA_BAP1_2	TCTACCCCATTGACCATGGT	21609	gRNA_OTUD7A_2	TCTCTGTTCCATGGACACAA	47133	gRNA_MPND_3	ACAAGAGTCGGAGACCACTG	30307	gRNA_USP17L3_1	AACTTTACACACTTCTGCCA	4404
gRNA_FAM188B_1	AAGATGCTCAGAGACTACAC	22452	gRNA_USP25_2	GGCACCAAGGCACATAACGG	5669	gRNA_USP17L15_1	CAAACGTGTCATCGTCACAA	21404	gRNA_FAM188B2_1	TCACTTACTATGTTTCAGAG	46839	gRNA_USP39_1	GAACATCAAACGTCCTCCAG	30182	gRNA_USP42_1	AAATATCTGACAAACAAGAG	4342
gRNA_USP39_1	GAACATCAAACGTCCTCCAG	22449	gRNA_USP9Y_1	TAACAATACTCATCGCCTAG	6932	gRNA_USP39_1	GAACATCAAACGTCCTCCAG	20942	gRNA_OTULIN_2	ATTGCTTATACATGAAAGAG	46623	gRNA_USP39_2	ACTGCCTGAAGCATCTCATG	29655	gRNA_USP24_3	TCTCCAACTAGTATTATGAG	4325
gRNA_USP17L20_2	CCAAGTGCTCGTCCAACTCG	22403	gRNA_Non-Targeting_Control_28	GGACGCACCATTCCGGGTGA	15932	gRNA_USP17L11_2	TTGGCTGCTGGCTTCCATAG	20904	gRNA_USP5_2	GGAGAAGTTTGAATTAGACG	46419	gRNA_USP17L2_3	ATTGCGGTCTTTGTCTCCAG	29407	gRNA_USP17L24_1	GACCTGCTGCGGTGGGGGCT	4162
gRNA_OTUD7A_2	TCTCTGTTCCATGGACACAA	22274	gRNA_USP48_3	CAGACACGTAAACCCAAGTG	12315	gRNA_UCHL5_3	GAATTAGATGGATTAAGAGA	20625	gRNA_USP24_3	TCTCCAACTAGTATTATGAG	46408	gRNA_MYSM1_3	ATGGTGTTATCCAAGGTCCA	29265	gRNA_OTUD4_2	TTACCTGTACATAAGAGAAA	4131
gRNA_USP17L12_1	TACATGTCTCAGCCGAACAC	22020	gRNA_Non-Targeting_Control_36	TGTGAAAGTTTATGGTGTTA	12575	gRNA_MYSM1_2	GAGATGTTAATTGTATTGGA	19919	gRNA_USP39_1	GAACATCAAACGTCCTCCAG	46200	gRNA_USP7_3	GGCAGTAGAACAGCTCGATG	28921	gRNA_USP7_3	GGCAGTAGAACAGCTCGATG	4044
gRNA_PSMD14_2	AGCCTTGTCGGAGAGAGCTG	21922	gRNA_FAM63B_2	GAGGGTCTACTAACCACCCA	6679	gRNA_OTUD7A_2	TCTCTGTTCCATGGACACAA	19529	gRNA_OTUD6A_1	TGCGCCGCCACCAACGCGAG	45609	gRNA_JOSD1_3	GGACAGCAATGCCTTCACCC	28407	gRNA_USP15_2	TCTAACTAAGTAAACTTCCA	3892
gRNA_YOD1_3	GAGGATTCGCTGACCGCCGG	21817	gRNA_USP9X_1	TCATACTATACTCATCGACA	2023	gRNA_USP17L24_2	TCTGAGCTGCCTGGATATCC	18987	gRNA_USP8_3	TGAAGTCCGGAAAAAACTTG	45131	gRNA_USP7_2	GGCAACCTTTCAGTTCACTG	28363	gRNA_CYLD_3	TGAGACTGAATGGTAAAGAG	3884
gRNA_USP8_3	TGAAGTCCGGAAAAAACTTG	21561	gRNA_USP17L1_3	GACATGGCCAGGACTGTGGA	9684	gRNA_OTUD4_1	TCTTCAATACAGGAATGGGT	18723	gRNA_OTUD4_2	TTACCTGTACATAAGAGAAA	45111	gRNA_USP33_1	AACAGTCGACTTAAACAACC	28164	gRNA_USP17L20_1	GATGCTAGAGGCGGTGACCT	3810
gRNA_OTUD4_2	TTACCTGTACATAAGAGAAA	21533	gRNA_USP17L27_2	CCCTTACCTGGACATCGCCC	4020	gRNA_OTUD4_2	TTACCTGTACATAAGAGAAA	18667	gRNA_VCPIP1_1	GTGTAGCACTACGTCCGGGT	45040	gRNA_USP17L5_3	GTGTAAAGTTAACGTCTTGG	27789	gRNA_MYSM1_3	ATGGTGTTATCCAAGGTCCA	3787
gRNA_PSMD14_1	AAACACATCAATCACTCTGA	21472	gRNA_STAMBP_1	AATCGATGGATTGCGCCATG	8036	gRNA_USP8_1	ATGAAGGAGCCATTTCCGGT	18593	gRNA_YOD1_3	GAGGATTCGCTGACCGCCGG	44396	gRNA_FAM188B_1	AAGATGCTCAGAGACTACAC	27367	gRNA_USP17L28_3	GCATAGAGGACATAGACGAG	3664
gRNA_VCPIP1_1	GTGTAGCACTACGTCCGGGT	21456	gRNA_USP17L4_2	TATGCAAGCTCACATCACAT	3576	gRNA_MYSM1_1	CAAGCTCAGAAATTACACTG	18200	gRNA_USP45_3	AGATTAATTATAATACAATG	43938	gRNA_USP17L13_1	CAGGAACCAAATCATCACAG	27343	gRNA_USP10_3	ACAACCGAGAATAAATTCAG	3579
gRNA_USP45_3	AGATTAATTATAATACAATG	21274	gRNA_USP36_2	GAGCACACGTATGAGAGCTG	4206	gRNA_USP16_2	TTAAGACACAGCCAAACTGA	18007	gRNA_PSMD14_2	AGCCTTGTCGGAGAGAGCTG	43927	gRNA_USP17L12_1	TACATGTCTCAGCCGAACAC	27299	gRNA_USP37_1	AGGGTTGCTAGAAAATCGGT	3577
gRNA_OTUD6A_1	TGCGCCGCCACCAACGCGAG	21057	gRNA_USP17L28_1	TATGCAAGCTCACATCACAC	2540	gRNA_USP6_3	TCTCCGGAACCTGATTGACG	17923	gRNA_USP17L19_2	TACATGTCTCAGACGAACAC	43314	gRNA_UCHL3_3	GGTCTCATGAGTAACTCGGA	27185	gRNA_USP54_2	AAGGTTTACCTAAAGCACCA	3560
gRNA_Non-Targeting_Control_31	TGACGCTCCACGTCCGGACC	20961	gRNA_USP9Y_3	TGATGGTCCCAATCTAGAGG	10572	gRNA_USP15_2	TCTAACTAAGTAAACTTCCA	17544	gRNA_Non-Targeting_Control_31	TGACGCTCCACGTCCGGACC	43026	gRNA_USP17L18_3	GACGACTCACTCTACTTGGG	27119	gRNA_USP17L21_2	AACTTTACTCACCTCTGCCA	3524
gRNA_OTUD4_3	GAACAGAGAGAAATTTGAAG	20925	gRNA_OTUD3_1	AGCACTACGACAGTGTTCGG	2345	gRNA_USP17L22_3	TCAAACGTGTCATCGTCACA	16831	gRNA_USP17L15_2	ACATGTATAGCTTCATGTCA	42629	gRNA_USP1_1	GGCGACTGCTTAACACACTG	26603	gRNA_Non-Targeting_Control_37	GCGAATGCCTGAAAGTATAA	3506
gRNA_USP17L15_2	ACATGTATAGCTTCATGTCA	20924	gRNA_USP15_2	TCTAACTAAGTAAACTTCCA	1431	gRNA_USP17L27_1	AGCCCAGCCCCCACCGCAGC	16718	gRNA_USP24_1	AGACACGGACAACTGTCGGT	42367	gRNA_PAN2_1	GTTCCACCTTAAAAGTACGG	25840	gRNA_USP16_2	TTAAGACACAGCCAAACTGA	3492
gRNA_USP24_1	AGACACGGACAACTGTCGGT	20853	gRNA_OTUD5_2	GAATGCCATAAAAACATCGG	1957	gRNA_USP10_1	ACTGACCAAAATCAGCCCCG	16582	gRNA_PSMD14_1	AAACACATCAATCACTCTGA	42027	gRNA_USP54_2	AAGGTTTACCTAAAGCACCA	25447	gRNA_USP39_2	ACTGCCTGAAGCATCTCATG	3491
gRNA_PAN2_1	GTTCCACCTTAAAAGTACGG	20584	gRNA_USP13_1	CCTGAAAAGACATGTGCGAG	12046	gRNA_USP17L25_1	AAGAGATTCTCCGATGTCAC	16515	gRNA_OTUD7B_1	AAGCGTTGAAAAGGCGCTGG	41409	gRNA_USP18_3	TCAGGTGTTCGTAATGAATG	25308	gRNA_ZRANB1_3	GAGTCCCGCTTCGTAGCAGG	3366
gRNA_USP1_3	GAAGTTAAACCCATAAACAA	20403	gRNA_USP8_1	ATGAAGGAGCCATTTCCGGT	1907	gRNA_USP42_1	AAATATCTGACAAACAAGAG	16388	gRNA_PAN2_1	GTTCCACCTTAAAAGTACGG	41178	gRNA_USP10_3	ACAACCGAGAATAAATTCAG	25230	gRNA_USP39_1	GAACATCAAACGTCCTCCAG	3274
gRNA_USP6_3	TCTCCGGAACCTGATTGACG	20204	gRNA_FAM188B_1	AAGATGCTCAGAGACTACAC	2601	gRNA_USP17L12_1	TACATGTCTCAGCCGAACAC	16283	gRNA_USP1_3	GAAGTTAAACCCATAAACAA	41085	gRNA_USP17L19_1	ACACGTTTGAGAGTGCTCCC	24041	gRNA_USP7_1	AGATGTATGATCCCAAAACG	3236
gRNA_ZC3H12A_1	CAGCTCCCTCTAGTCCCGCG	19812	gRNA_USP48_2	CTGGCGCCAACTCCGCAAGG	15534	gRNA_USP5_2	GGAGAAGTTTGAATTAGACG	16072	gRNA_OTUD4_3	GAACAGAGAGAAATTTGAAG	40659	gRNA_USP17L15_1	CAAACGTGTCATCGTCACAA	23913	gRNA_OTUD5_1	GGTTGTGCGAAAGCATTGCA	3157
gRNA_USP17L19_2	TACATGTCTCAGACGAACAC	19715	gRNA_Non-Targeting_Control_21	TCCGGAGGCTCAAACCAAGT	7418	gRNA_USP30_3	AGGTGTTCCCTAAATTAACA	15648	gRNA_USP17L24_1	GACCTGCTGCGGTGGGGGCT	40337	gRNA_OTUD4_3	GAACAGAGAGAAATTTGAAG	23547	gRNA_USP17L2_3	ATTGCGGTCTTTGTCTCCAG	2948
gRNA_OTUD7B_1	AAGCGTTGAAAAGGCGCTGG	19672	gRNA_STAMBP_2	AAGGCCAGCTAAGCCACCTG	9821	gRNA_UCHL1_1	AATCGGACTTATTCACGCAG	15566	gRNA_ZC3H12A_1	CAGCTCCCTCTAGTCCCGCG	40219	gRNA_USP15_2	TCTAACTAAGTAAACTTCCA	23504	gRNA_OTULIN_3	TGAACTATTCACAAATGAGG	2873
gRNA_USP17L24_1	GACCTGCTGCGGTGGGGGCT	19638	gRNA_USP17L8_3	ACACGGGTCTCAGATGAGAG	8490	gRNA_USP38_3	TCTCTATGAACCTATTCTGG	15549	gRNA_Non-Targeting_Control_4	AAATTGGCTTTCGTTCGTGC	39804	gRNA_USP17L21_2	AACTTTACTCACCTCTGCCA	23318	gRNA_USP17L5_3	GTGTAAAGTTAACGTCTTGG	2791
gRNA_Non-Targeting_Control_5	TTAACTCGAACGCTCGAAAG	19371	gRNA_USP44_1	ATCACTGCACAACTCGTAGT	8803	gRNA_USP17L13_1	CAGGAACCAAATCATCACAG	15513	gRNA_USP6_3	TCTCCGGAACCTGATTGACG	39238	gRNA_PSMD14_3	TACCAACCAACAACCATCTC	22702	gRNA_Non-Targeting_Control_27	TAAAGCAGAAGAATATACAG	2781
gRNA_USP17L2_3	ATTGCGGTCTTTGTCTCCAG	19262	gRNA_USP38_3	TCTCTATGAACCTATTCTGG	2356	gRNA_USP17L15_3	GACAGAAGTGATGCTAGAGG	15499	gRNA_USP17L2_3	ATTGCGGTCTTTGTCTCCAG	39097	gRNA_USP1_2	TGGTATTAACAGCATAGAGA	22430	gRNA_USP17L19_1	ACACGTTTGAGAGTGCTCCC	2659
gRNA_Non-Targeting_Control_4	AAATTGGCTTTCGTTCGTGC	18187	gRNA_USP17L25_2	TGAATTTCTCATGTTCACTG	2005	gRNA_OTUD7B_1	AAGCGTTGAAAAGGCGCTGG	15409	gRNA_Non-Targeting_Control_5	TTAACTCGAACGCTCGAAAG	37394	gRNA_USP17L3_1	AACTTTACACACTTCTGCCA	21645	gRNA_USP17L15_1	CAAACGTGTCATCGTCACAA	2578
gRNA_OTUB2_3	GATTTACCGGAGGAAAATCG	18176	gRNA_USP37_1	AGGGTTGCTAGAAAATCGGT	2908	gRNA_USP18_3	TCAGGTGTTCGTAATGAATG	14422	gRNA_USP42_1	AAATATCTGACAAACAAGAG	36830	gRNA_USP17L11_2	TTGGCTGCTGGCTTCCATAG	20536	gRNA_USP17L12_1	TACATGTCTCAGCCGAACAC	2550
gRNA_USP8_1	ATGAAGGAGCCATTTCCGGT	17650	gRNA_USP32_3	CTGTAGTATTCACGTAACTG	15928	gRNA_USP15_3	AAGGTGTTCCTTAAGTGACT	14062	gRNA_MPND_3	ACAAGAGTCGGAGACCACTG	36620	gRNA_USP37_3	ACTCCAAATTAGTAATAACA	20533	gRNA_PSMD14_2	AGCCTTGTCGGAGAGAGCTG	2496
gRNA_USP17L26_3	TCCAAATATTTGGTGGATGA	17441	gRNA_UCHL3_1	GGATCCTGAACTCCTTAGCA	6723	gRNA_USP17L27_2	CCCTTACCTGGACATCGCCC	13702	gRNA_USP35_1	AGAACTCGGCGAAGACGTCG	36590	gRNA_USP15_3	AAGGTGTTCCTTAAGTGACT	20229	gRNA_UCHL3_3	GGTCTCATGAGTAACTCGGA	2395
gRNA_USP42_1	AAATATCTGACAAACAAGAG	17191	gRNA_MYSM1_2	GAGATGTTAATTGTATTGGA	5031	gRNA_FAM188B_1	AAGATGCTCAGAGACTACAC	12715	gRNA_USP8_1	ATGAAGGAGCCATTTCCGGT	36526	gRNA_USP17L15_3	GACAGAAGTGATGCTAGAGG	19965	gRNA_OTUD3_1	AGCACTACGACAGTGTTCGG	2339
gRNA_MPND_3	ACAAGAGTCGGAGACCACTG	17090	gRNA_USP4_1	GAAATGGCAACTCAGCACAT	8356	gRNA_USP45_3	AGATTAATTATAATACAATG	12501	gRNA_OTUB2_3	GATTTACCGGAGGAAAATCG	35438	gRNA_USP8_2	GTATTTCATATATAGTACAT	19587	gRNA_USP17L26_3	TCCAAATATTTGGTGGATGA	2316
gRNA_USP35_1	AGAACTCGGCGAAGACGTCG	17088	gRNA_USP17L25_1	AAGAGATTCTCCGATGTCAC	3355	gRNA_USP8_2	GTATTTCATATATAGTACAT	11405	gRNA_COPS5_3	GGGTGGTATCATAGCCACCC	34977	gRNA_USP45_3	AGATTAATTATAATACAATG	19442	gRNA_USP8_1	ATGAAGGAGCCATTTCCGGT	2233
gRNA_OTUD5_2	GAATGCCATAAAAACATCGG	16145	gRNA_USP5_1	ATCCTGGGTAGGGTCCGTCG	4980	gRNA_USP17L21_2	AACTTTACTCACCTCTGCCA	10891	gRNA_OTUD5_2	GAATGCCATAAAAACATCGG	33701	gRNA_USP8_1	ATGAAGGAGCCATTTCCGGT	18491	gRNA_USP1_2	TGGTATTAACAGCATAGAGA	2159
gRNA_COPS5_3	GGGTGGTATCATAGCCACCC	16113	gRNA_USP20_1	GTCGACCTACCAATTGGACA	7581	gRNA_USP17L22_1	AGTGAACATGAGAAATTCAT	10839	gRNA_Non-Targeting_Control_21	TCCGGAGGCTCAAACCAAGT	32911	gRNA_OTUD3_1	AGCACTACGACAGTGTTCGG	17630	gRNA_USP17L13_1	CAGGAACCAAATCATCACAG	2140
gRNA_USP17L11_1	TGCCAACTACATGCTGTCCC	16021	gRNA_USP17L18_3	GACGACTCACTCTACTTGGG	3192	gRNA_USP17L26_1	TAGCAGGAGACCTGCTGCGG	9929	gRNA_USP17L26_3	TCCAAATATTTGGTGGATGA	32839	gRNA_USP17L26_3	TCCAAATATTTGGTGGATGA	17038	gRNA_OTUD4_3	GAACAGAGAGAAATTTGAAG	2119
gRNA_USP38_2	GAAGCCTCAAAGAATATCCG	15660	gRNA_Non-Targeting_Control_3	AAATAATATGCATCTCTCGA	5255	gRNA_PAN2_1	GTTCCACCTTAAAAGTACGG	9739	gRNA_USP17L11_1	TGCCAACTACATGCTGTCCC	32437	gRNA_OTULIN_3	TGAACTATTCACAAATGAGG	15934	gRNA_OTUD5_2	GAATGCCATAAAAACATCGG	1995
gRNA_Non-Targeting_Control_21	TCCGGAGGCTCAAACCAAGT	15221	gRNA_ATXN3L_3	TCAGAAAACATGGATGATAC	7510	gRNA_USP50_3	GTGAGAAAGTATTCCACCAG	9398	gRNA_USP38_2	GAAGCCTCAAAGAATATCCG	31689	gRNA_USP17L11_1	TGCCAACTACATGCTGTCCC	15768	gRNA_USP1_1	GGCGACTGCTTAACACACTG	1917
gRNA_USP17L27_1	AGCCCAGCCCCCACCGCAGC	14531	gRNA_USP17L13_2	CTGTGATGATTTGGTTCCTG	15441	gRNA_Non-Targeting_Control_1	AAAACATCGACCGAAAGCGT	9343	gRNA_USP17L27_1	AGCCCAGCCCCCACCGCAGC	31034	gRNA_USP7_1	AGATGTATGATCCCAAAACG	14754	gRNA_USP17L15_3	GACAGAAGTGATGCTAGAGG	1889
gRNA_USP9X_1	TCATACTATACTCATCGACA	14362	gRNA_USP3_1	CCCATTCCTTAACTCCACGG	6911	gRNA_USP10_3	ACAACCGAGAATAAATTCAG	9338	gRNA_YOD1_1	GCGGAGCCGCCACATCGTGT	30028	gRNA_OTUD4_2	TTACCTGTACATAAGAGAAA	14251	gRNA_USP17L11_1	TGCCAACTACATGCTGTCCC	1601
gRNA_USP51_3	TCCATGCAGAACATTTAGCA	14354	gRNA_USP17L30_1	TGTTTGTCTCCAGAGGGCGC	5279	gRNA_USP7_2	GGCAACCTTTCAGTTCACTG	8996	gRNA_USP30_3	AGGTGTTCCCTAAATTAACA	29573	gRNA_USP17L22_3	TCAAACGTGTCATCGTCACA	14150	gRNA_USP37_2	AATGTGGTGCTTCGACCCAG	1492
gRNA_USP30_3	AGGTGTTCCCTAAATTAACA	14060	gRNA_Non-Targeting_Control_11	GAACTGGCAAACAGGCGTGG	19530	gRNA_USP17L11_1	TGCCAACTACATGCTGTCCC	8063	gRNA_USP51_3	TCCATGCAGAACATTTAGCA	29107	gRNA_PSMD14_2	AGCCTTGTCGGAGAGAGCTG	13968	gRNA_USP8_2	GTATTTCATATATAGTACAT	1450
gRNA_YOD1_1	GCGGAGCCGCCACATCGTGT	13882	gRNA_OTUB2_2	CGCCATCCGCAAGACCAAAG	6433	gRNA_USP17L22_2	TACATGTCTCAGCAGAACAC	7970	gRNA_USP17L22_3	TCAAACGTGTCATCGTCACA	28064	gRNA_USP17L27_1	AGCCCAGCCCCCACCGCAGC	13768	gRNA_USP45_3	AGATTAATTATAATACAATG	1414
gRNA_Non-Targeting_Control_37	GCGAATGCCTGAAAGTATAA	13778	gRNA_USP17L10_1	TCTCAGGGAGAGAAGTACGC	11421	gRNA_USP37_3	ACTCCAAATTAGTAATAACA	7660	gRNA_Non-Targeting_Control_37	GCGAATGCCTGAAAGTATAA	27106	gRNA_USP37_2	AATGTGGTGCTTCGACCCAG	13411	gRNA_PSMD14_1	AAACACATCAATCACTCTGA	1383
gRNA_USP17L22_3	TCAAACGTGTCATCGTCACA	13700	gRNA_OTULIN_2	ATTGCTTATACATGAAAGAG	4169	gRNA_PSMD14_2	AGCCTTGTCGGAGAGAGCTG	7426	gRNA_OTUD3_1	AGCACTACGACAGTGTTCGG	26946	gRNA_USP17L22_1	AGTGAACATGAGAAATTCAT	13262	gRNA_USP37_3	ACTCCAAATTAGTAATAACA	1354
gRNA_OTUD3_1	AGCACTACGACAGTGTTCGG	12970	gRNA_PSMD14_3	TACCAACCAACAACCATCTC	2592	gRNA_PSMD14_1	AAACACATCAATCACTCTGA	7426	gRNA_USP9X_1	TCATACTATACTCATCGACA	26924	gRNA_USP17L11_3	GTGTTCGTCTGAGACATGTA	13057	gRNA_USP1_3	GAAGTTAAACCCATAAACAA	1351
gRNA_MYSM1_3	ATGGTGTTATCCAAGGTCCA	12711	gRNA_USP33_2	ATAGTCAAAGCAGGATCATG	8165	gRNA_USP17L28_1	TATGCAAGCTCACATCACAC	7057	gRNA_MYSM1_3	ATGGTGTTATCCAAGGTCCA	25600	gRNA_OTUD5_2	GAATGCCATAAAAACATCGG	12831	gRNA_USP17L26_1	TAGCAGGAGACCTGCTGCGG	1346
gRNA_USP50_3	GTGAGAAAGTATTCCACCAG	10991	gRNA_OTUB2_3	GATTTACCGGAGGAAAATCG	5184	gRNA_USP17L26_3	TCCAAATATTTGGTGGATGA	6854	gRNA_USP15_3	AAGGTGTTCCTTAAGTGACT	22192	gRNA_USP1_3	GAAGTTAAACCCATAAACAA	12198	gRNA_USP17L11_3	GTGTTCGTCTGAGACATGTA	1237
gRNA_USP15_3	AAGGTGTTCCTTAAGTGACT	9804	gRNA_USP46_2	TGGCAACATGAACGAACCTG	9409	gRNA_OTUD5_2	GAATGCCATAAAAACATCGG	5548	gRNA_USP50_3	GTGAGAAAGTATTCCACCAG	20868	gRNA_PSMD14_1	AAACACATCAATCACTCTGA	11708	gRNA_USP17L27_1	AGCCCAGCCCCCACCGCAGC	1203
gRNA_USP18_3	TCAGGTGTTCGTAATGAATG	8716	gRNA_USP17L10_2	TGACATGGCCAGGAATGTGG	7247	gRNA_USP1_2	TGGTATTAACAGCATAGAGA	4613	gRNA_USP18_3	TCAGGTGTTCGTAATGAATG	19444	gRNA_USP9X_1	TCATACTATACTCATCGACA	10909	gRNA_USP17L22_3	TCAAACGTGTCATCGTCACA	1196
gRNA_USP17L26_1	TAGCAGGAGACCTGCTGCGG	7455	gRNA_USP20_3	CCTTTCTTGAGCACGTACGA	6833	gRNA_USP17L11_3	GTGTTCGTCTGAGACATGTA	4038	gRNA_USP17L26_1	TAGCAGGAGACCTGCTGCGG	16694	gRNA_USP17L25_2	TGAATTTCTCATGTTCACTG	9856	gRNA_USP17L28_1	TATGCAAGCTCACATCACAC	1031
gRNA_USP17L11_3	GTGTTCGTCTGAGACATGTA	4615	gRNA_USP9Y_2	TGGTACAGACCCCATAACAC	9830	gRNA_USP37_2	AATGTGGTGCTTCGACCCAG	3821	gRNA_USP37_2	AATGTGGTGCTTCGACCCAG	9777	gRNA_USP17L26_1	TAGCAGGAGACCTGCTGCGG	8258	gRNA_COPS6_1	GGTTCAACTTCAGAAAGAGG	966
gRNA_USP37_2	AATGTGGTGCTTCGACCCAG	4333	gRNA_VCPIP1_3	CCCCTTGGTAGGCATAAAAG	3123	gRNA_COPS6_1	GGTTCAACTTCAGAAAGAGG	3515	gRNA_USP17L11_3	GTGTTCGTCTGAGACATGTA	9323	gRNA_COPS6_1	GGTTCAACTTCAGAAAGAGG	6773	gRNA_USP9X_1	TCATACTATACTCATCGACA	690
gRNA_USP17L29_3	ATTGTGGTGTTTGTCTCCAG	1896	gRNA_Non-Targeting_Control_31	TGACGCTCCACGTCCGGACC	9000	gRNA_USP1_3	GAAGTTAAACCCATAAACAA	1858	gRNA_USP17L29_3	ATTGTGGTGTTTGTCTCCAG	2951	gRNA_USP17L28_1	TATGCAAGCTCACATCACAC	5185	gRNA_USP17L25_2	TGAATTTCTCATGTTCACTG	533
gRNA_Non-Targeting_Control_1	AAAACATCGACCGAAAGCGT	997	gRNA_ZRANB1_1	TCAGTTCTACAAGCTACCTG	4244	gRNA_USP17L29_3	ATTGTGGTGTTTGTCTCCAG	3	gRNA_Non-Targeting_Control_1	AAAACATCGACCGAAAGCGT	2097	gRNA_USP17L29_3	ATTGTGGTGTTTGTCTCCAG	609	gRNA_USP17L29_3	ATTGTGGTGTTTGTCTCCAG	139
