# Supplementary material for: Circular synthesized CRISPR/Cas gRNAs for functional interrogations in the coding and noncoding genome
Source: eLife journal article supplement (doi:10.7554/elife.42549), 2019-03-06
Supplement: supp [file elife-42549-supp-v1.zip › elife_poa_e42549_Supplementary_File_20.xlsx]

## Sheet: Sheet1
sequence	name	count
AGGTCGAGAATTCAAAAACCAAATAAAGCTCCAGGATTACTCGAGTAATCCTGGAGCTTTATTTGGACCGGTGTTTCGTC	BIRC6-1	5630
AGGTCGAGAATTCAAAAACCAACCCAACATTGATAGTCCCTCGAGGGACTATCAATGTTGGGTTGGACCGGTGTTTCGTC	UBE2C-2	10333
AGGTCGAGAATTCAAAAACCAAGAACAAGAGGAAAGAAACTCGAGTTTCTTTCCTCTTGTTCTTGGACCGGTGTTTCGTC	UBE2E4P-2	24380
AGGTCGAGAATTCAAAAACCAAGAGTACATCCAGAAATACTCGAGTATTTCTGGATGTACTCTTGGACCGGTGTTTCGTC	UBE2H-1	13325
AGGTCGAGAATTCAAAAACCACAGAAAGCACAAGACGAACTCGAGTTCGTCTTGTGCTTTCTGTGGACCGGTGTTTCGTC	UBE2J2-1	2639
AGGTCGAGAATTCAAAAACCACTATTACTTGCAGAAGAACTCGAGTTCTTCTGCAAGTAATAGTGGACCGGTGTTTCGTC	UBE2NL-2	10129
AGGTCGAGAATTCAAAAACCAGAAGGAACTTGCAGAAATCTCGAGATTTCTGCAAGTTCCTTCTGGACCGGTGTTTCGTC	UBE2E2-2	11918
AGGTCGAGAATTCAAAAACCAGAGATGGCTGAAGATATACTCGAGTATATCTTCAGCCATCTCTGGACCGGTGTTTCGTC	UBE2Q2-1	5735
AGGTCGAGAATTCAAAAACCAGGAAGAGATGCTTGATAACTCGAGTTATCAAGCATCTCTTCCTGGACCGGTGTTTCGTC	UBE2T-2	6557
AGGTCGAGAATTCAAAAACCCAAACGAGAATATGAGAAACTCGAGTTTCTCATATTCTCGTTTGGGACCGGTGTTTCGTC	UBE2B-2	9776
AGGTCGAGAATTCAAAAACCCAACACACCTTATGAGAAACTCGAGTTTCTCATAAGGTGTGTTGGGACCGGTGTTTCGTC	UBE2T-1	15098
AGGTCGAGAATTCAAAAACCCAACAGACATGCAAGAGAACTCGAGTTCTCTTGCATGTCTGTTGGGACCGGTGTTTCGTC	UBE2D1-2	9023
AGGTCGAGAATTCAAAAACCCAACATTGATAGTCCCTTGCTCGAGCAAGGGACTATCAATGTTGGGACCGGTGTTTCGTC	UBE2C-1	10723
AGGTCGAGAATTCAAAAACCCAGAAGAAGAGGAAGAAGACTCGAGTCTTCTTCCTCTTCTTCTGGGACCGGTGTTTCGTC	UBE2Q2-2	4865
AGGTCGAGAATTCAAAAACCCAGAAGAATACAAGCAGAACTCGAGTTCTGCTTGTATTCTTCTGGGACCGGTGTTTCGTC	UBE2H-2	18605
AGGTCGAGAATTCAAAAACCCAGACAGAGATAAGTACAACTCGAGTTGTACTTATCTCTGTCTGGGACCGGTGTTTCGTC	UBE2D3-2	7269
AGGTCGAGAATTCAAAAACCCAGAGGTCCTGCAGAACAACTCGAGTTGTTCTGCAGGACCTCTGGGACCGGTGTTTCGTC	UBE2M-1	3337
AGGTCGAGAATTCAAAAACCCAGCATTTGTCTCGATATTCTCGAGAATATCGAGACAAATGCTGGGACCGGTGTTTCGTC	UBE2D3-1	9501
AGGTCGAGAATTCAAAAACCCAGTATTACAAATGGAAGACTCGAGTCTTCCATTTGTAATACTGGGACCGGTGTTTCGTC	UBE2U-2	11897
AGGTCGAGAATTCAAAAACCCAGTCGAACTCGTGAATGACTCGAGTCATTCACGAGTTCGACTGGGACCGGTGTTTCGTC	UBE2Q1-2	7449
AGGTCGAGAATTCAAAAACCCATCAGAAAGAATGGAATTCTCGAGAATTCCATTCTTTCTGATGGGACCGGTGTTTCGTC	UBE2U-1	8408
AGGTCGAGAATTCAAAAACCCCAAAGAAGCGGAGAAAGACTCGAGTCTTTCTCCGCTTCTTTGGGGACCGGTGTTTCGTC	UBE2O-1	9972
AGGTCGAGAATTCAAAAACCCCACAACCCTGGCGGAATACTCGAGTATTCCGCCAGGGTTGTGGGGACCGGTGTTTCGTC	UBE2R2-1	4534
AGGTCGAGAATTCAAAAACCCCACCGAAGATCACATTTACTCGAGTAAATGTGATCTTCGGTGGGGACCGGTGTTTCGTC	UBE2L3-2	12959
AGGTCGAGAATTCAAAAACCCCATCAACGTTAACGGAAACTCGAGTTTCCGTTAACGTTGATGGGGACCGGTGTTTCGTC	UBE2DNL-1	10
AGGTCGAGAATTCAAAAACCCCGCAAATGTGGAATGGAACTCGAGTTCCATTCCACATTTGCGGGGACCGGTGTTTCGTC	UBE2L5P-1	7058
AGGTCGAGAATTCAAAAACCCCTACAAGGCCGACAGAGACTCGAGTCTCTGTCGGCCTTGTAGGGGACCGGTGTTTCGTC	UBE2D4-2	3235
AGGTCGAGAATTCAAAAACCCCTTCAGAATCGAAATCAACTCGAGTTGATTTCGATTCTGAAGGGGACCGGTGTTTCGTC	UBE2L3-1	20104
AGGTCGAGAATTCAAAAACCCCTTTAAGAGTTTGGTGAACTCGAGTTCACCAAACTCTTAAAGGGGACCGGTGTTTCGTC	UBE2QL1-2	8407
AGGTCGAGAATTCAAAAACCCGACATTGATGATGAAGATCTCGAGATCTTCATCATCAATGTCGGGACCGGTGTTTCGTC	UBE2R2-2	9681
AGGTCGAGAATTCAAAAACCCGCCAAGGGTTGCGGACTACTCGAGTAGTCCGCAACCCTTGGCGGGACCGGTGTTTCGTC	UBE2DNL-2	809
AGGTCGAGAATTCAAAAACCCGGAAGATGTTGAGTGAAACTCGAGTTTCACTCAACATCTTCCGGGACCGGTGTTTCGTC	BIRC6-2	6441
AGGTCGAGAATTCAAAAACCCGTACGCGGAATACTTCGACTCGAGTCGAAGTATTCCGCGTACGGGACCGGTGTTTCGTC	GL2	9996
AGGTCGAGAATTCAAAAACCCGTCCGAAGTGATTAAATACTCGAGTATTTAATCACTTCGGACGGGACCGGTGTTTCGTC	ATG10-2	5263
AGGTCGAGAATTCAAAAACCCTAATGATGTCCAAAGAAACTCGAGTTTCTTTGGACATCATTAGGGACCGGTGTTTCGTC	UBE2V2-2	9850
AGGTCGAGAATTCAAAAACCCTGAAGAACAAGAGGAAAGCTCGAGCTTTCCTCTTGTTCTTCAGGGACCGGTGTTTCGTC	UBE2E3-2	10725
AGGTCGAGAATTCAAAAACCCTGAAGAACAGCACAATAACTCGAGTTATTGTGCTGTTCTTCAGGGACCGGTGTTTCGTC	AKTIP-1	6103
AGGTCGAGAATTCAAAAACCCTGAAGTCGTGGAGGAGATCTCGAGATCTCCTCCACGACTTCAGGGACCGGTGTTTCGTC	UBE2J2-2	3073
AGGTCGAGAATTCAAAAACCCTGCAGATATGGAAGAATACTCGAGTATTCTTCCATATCTGCAGGGACCGGTGTTTCGTC	ATG3-2	12318
AGGTCGAGAATTCAAAAACCCTTACGCTGAGTACTTCGACTCGAGTCGAAGTACTCAGCGTAAGGGACCGGTGTTTCGTC	GL3	22510
AGGTCGAGAATTCAAAAACCGAACAAACGGGAATATGAACTCGAGTTCATATTCCCGTTTGTTCGGACCGGTGTTTCGTC	UBE2A-2	7148
AGGTCGAGAATTCAAAAACCGAACAAAGCTGGAATGATTCTCGAGAATCATTCCAGCTTTGTTCGGACCGGTGTTTCGTC	UBE2B-1	5881
AGGTCGAGAATTCAAAAACCGAACAAAGCTGGCGTGATTCTCGAGAATCACGCCAGCTTTGTTCGGACCGGTGTTTCGTC	UBE2A-1	2077
AGGTCGAGAATTCAAAAACCGAGAAAAGTACAACAGAATCTCGAGATTCTGTTGTACTTTTCTCGGACCGGTGTTTCGTC	UBE2D2-2	7714
AGGTCGAGAATTCAAAAACCGAGAATGGACTCAGAAATACTCGAGTATTTCTGAGTCCATTCTCGGACCGGTGTTTCGTC	UBE2D1-1	7804
AGGTCGAGAATTCAAAAACCGAGATTTACCTGTGAGATGCTCGAGCATCTCACAGGTAAATCTCGGACCGGTGTTTCGTC	UBE2G2-2	11484
AGGTCGAGAATTCAAAAACCGAGGAAAGCATGGAGGAAACTCGAGTTTCCTCCATGCTTTCCTCGGACCGGTGTTTCGTC	UBE2I-1	7865
AGGTCGAGAATTCAAAAACCGAGTATAAGGACAGCATTACTCGAGTAATGCTGTCCTTATACTCGGACCGGTGTTTCGTC	UBE2J1-1	8236
AGGTCGAGAATTCAAAAACCGCAAGAACCAGAAAGAGAACTCGAGTTCTCTTTCTGGTTCTTGCGGACCGGTGTTTCGTC	UBE2E2-1	5480
AGGTCGAGAATTCAAAAACCGCAAGAGAGTGGACACAAACTCGAGTTTGTGTCCACTCTCTTGCGGACCGGTGTTTCGTC	UBE2D4-1	3966
AGGTCGAGAATTCAAAAACCGCATCAAGGTCTTTCCCAACTCGAGTTGGGAAAGACCTTGATGCGGACCGGTGTTTCGTC	UBE2S-1	3285
AGGTCGAGAATTCAAAAACCGCGAAAGAATGGAGGGAAGCTCGAGCTTCCCTCCATTCTTTCGCGGACCGGTGTTTCGTC	UBE2G1-2	1615
AGGTCGAGAATTCAAAAACCGCTGAAATGTGGATGCATACTCGAGTATGCATCCACATTTCAGCGGACCGGTGTTTCGTC	UBE2V1-2	4146
AGGTCGAGAATTCAAAAACCGCTGAAGTTTACAGAGAAACTCGAGTTTCTCTGTAAACTTCAGCGGACCGGTGTTTCGTC	UBE2L2-1	12445
AGGTCGAGAATTCAAAAACCGCTTGGACATATTGAAAGACTCGAGTCTTTCAATATGTCCAAGCGGACCGGTGTTTCGTC	UBE2E1-1	2228
AGGTCGAGAATTCAAAAACCGCTTTGAACAGGAGAGACACTCGAGTGTCTCTCCTGTTCAAAGCGGACCGGTGTTTCGTC	UBE2Z-2	5078
AGGTCGAGAATTCAAAAACCGGAAAGACGATGACGGAAACTCGAGTTTCCGTCATCGTCTTTCCGGACCGGTGTTTCGTC	GL4	6757
AGGTCGAGAATTCAAAAACCGGAAAGAGAGCAAGGGGAACTCGAGTTCCCCTTGCTCTCTTTCCGGACCGGTGTTTCGTC	CDC34-2	3196
AGGTCGAGAATTCAAAAACCGGAAGAAGATGAAGATGAACTCGAGTTCATCTTCATCTTCTTCCGGACCGGTGTTTCGTC	ATG3-1	8090
AGGTCGAGAATTCAAAAACCGGAAGTGGAAAGAGAGCAACTCGAGTTGCTCTCTTTCCACTTCCGGACCGGTGTTTCGTC	CDC34-1	3009
AGGTCGAGAATTCAAAAACCGGAAGTTTGTGTTCAGTTTCTCGAGAAACTGAACACAAACTTCCGGACCGGTGTTTCGTC	UBE2M-2	2785
AGGTCGAGAATTCAAAAACCGGAATAAAGTGGATGACTACTCGAGTAGTCATCCACTTTATTCCGGACCGGTGTTTCGTC	UBE2F-1	4351
AGGTCGAGAATTCAAAAACCGGAATGACCTTAAATGAGACTCGAGTCTCATTTAAGGTCATTCCGGACCGGTGTTTCGTC	UBE2W-1	6520
AGGTCGAGAATTCAAAAACCGGACAAACATACAACAATTCTCGAGAATTGTTGTATGTTTGTCCGGACCGGTGTTTCGTC	UBE2V2-1	8456
AGGTCGAGAATTCAAAAACCGGACAAGAATCTATCATTGCTCGAGCAATGATAGATTCTTGTCCGGACCGGTGTTTCGTC	UBE2E1-2	7354
AGGTCGAGAATTCAAAAACCGGACACAGTCTTAGAAACACTCGAGTGTTTCTAAGACTGTGTCCGGACCGGTGTTTCGTC	UBE2N-1	6782
AGGTCGAGAATTCAAAAACCGGACATAAAGAAAGGGAATCTCGAGATTCCCTTTCTTTATGTCCGGACCGGTGTTTCGTC	UBE2Q1-1	10493
AGGTCGAGAATTCAAAAACCGGACATATGGGAAGGAGTTCTCGAGAACTCCTTCCCATATGTCCGGACCGGTGTTTCGTC	ATG10-1	5469
AGGTCGAGAATTCAAAAACCGGACGAGAACGGACAGATTCTCGAGAATCTGTCCGTTCTCGTCCGGACCGGTGTTTCGTC	UBE2L6-1	2222
AGGTCGAGAATTCAAAAACCGGAGATAACATTTGTGAATCTCGAGATTCACAAATGTTATCTCCGGACCGGTGTTTCGTC	UBE2E4P-1	14229
AGGTCGAGAATTCAAAAACCGGATGTAGAGACTGCAACACTCGAGTGTTGCAGTCTCTACATCCGGACCGGTGTTTCGTC	UBE2K-1	2388
AGGTCGAGAATTCAAAAACCGGCTATATGCCATGAATAACTCGAGTTATTCATGGCATATAGCCGGACCGGTGTTTCGTC	UBE2N-2	6866
AGGTCGAGAATTCAAAAACCGGGAAATATGTCTGAGTTTCTCGAGAAACTCAGACATATTTCCCGGACCGGTGTTTCGTC	UBE2F-2	4359
AGGTCGAGAATTCAAAAACCGGGAAGATAAGTATGGTTACTCGAGTAACCATACTTATCTTCCCGGACCGGTGTTTCGTC	UBE2G1-1	7717
AGGTCGAGAATTCAAAAACCGGGAAGGAGGCTTGTTTAACTCGAGTTAAACAAGCCTCCTTCCCGGACCGGTGTTTCGTC	UBE2I-2	2818
AGGTCGAGAATTCAAAAACCGGGAATGGACTCAGAAGTACTCGAGTACTTCTGAGTCCATTCCCGGACCGGTGTTTCGTC	UBE2D2-1	2972
AGGTCGAGAATTCAAAAACCGGTCATGTTTACTGGTGAACTCGAGTTCACCAGTAAACATGACCGGACCGGTGTTTCGTC	UBE2W-2	5819
AGGTCGAGAATTCAAAAACCGGTGAAGAGAAGACATTAACTCGAGTTAATGTCTTCTCTTCACCGGACCGGTGTTTCGTC	AKTIP-2	7435
AGGTCGAGAATTCAAAAACCGGTTGAACTTGGAGAAAGACTCGAGTCTTTCTCCAAGTTCAACCGGACCGGTGTTTCGTC	UBE2V1-1	4422
AGGTCGAGAATTCAAAAACCGTGAATAGACCGAATATCACTCGAGTGATATTCGGTCTATTCACGGACCGGTGTTTCGTC	UBE2L6-2	6722
AGGTCGAGAATTCAAAAACCGTGACATGATGGAAGGAAACTCGAGTTTCCTTCCATCATGTCACGGACCGGTGTTTCGTC	UBE2Z-1	6261
AGGTCGAGAATTCAAAAACCTAAGAATGCTGAAGAGTTTCTCGAGAAACTCTTCAGCATTCTTAGGACCGGTGTTTCGTC	UBE2L1-2	22320
AGGTCGAGAATTCAAAAACCTAGACAAGTTGGAAAGAATCTCGAGATTCTTTCCAACTTGTCTAGGACCGGTGTTTCGTC	UBE2NL-1	20839
AGGTCGAGAATTCAAAAACCTCAACGTGCTCAAGAGGGACTCGAGTCCCTCTTGAGCACGTTGAGGACCGGTGTTTCGTC	UBE2S-2	5841
AGGTCGAGAATTCAAAAACCTCAAGAAGCTACAGGAAAACTCGAGTTTTCCTGTAGCTTCTTGAGGACCGGTGTTTCGTC	UBE2O-2	11243
AGGTCGAGAATTCAAAAACCTGAAAGAAGCGGCAGAATTCTCGAGAATTCTGCCGCTTCTTTCAGGACCGGTGTTTCGTC	UBE2J1-2	7568
AGGTCGAGAATTCAAAAACCTGAAGGAGCTTGAAGAAATCTCGAGATTTCTTCAAGCTCCTTCAGGACCGGTGTTTCGTC	UBE2L5P-2	52005
AGGTCGAGAATTCAAAAACCTGACGAAAGTGGAGCTAACCTCGAGGTTAGCTCCACTTTCGTCAGGACCGGTGTTTCGTC	UBE2G2-1	7308
AGGTCGAGAATTCAAAAACCTGGCAGGACATGAAGGAGACTCGAGTCTCCTTCATGTCCTGCCAGGACCGGTGTTTCGTC	UBE2QL1-1	2459
AGGTCGAGAATTCAAAAACCTGTAGAGACTGCAACAGAACTCGAGTTCTGTTGCAGTCTCTACAGGACCGGTGTTTCGTC	UBE2K-2	4274
