# Supplementary material for: Circular synthesized CRISPR/Cas gRNAs for functional interrogations in the coding and noncoding genome
Source: eLife journal article supplement (doi:10.7554/elife.42549), 2019-03-06
Supplement: supp [file elife-42549-supp-v1.zip › elife_poa_e42549_Supplementary_File_21.xlsx]

## Sheet: merged_Opti200_guides_and_readcounts
Experiment 1		Experiment 2		Experiment 2
sequence	count	sequence	count	sequence	count
GCACTTGTAACGGCGTTAAA	26596	CCTACCACCAAACATAACGG	3879	CTTGGGCCACGTTTGTTCGA	21512
CCTGCTCCTGGTCATATGGG	21009	AATCTACCATTATTTATCGA	3715	CTGCTGCTCCTATCGATCGG	20975
CTAGCCTTAACCTAGCCGAA	20547	GGGTTCTACCACTTGACAAA	3620	TGATCCCCTCCCGATAGACA	20446
CTGGCACCACTACATTAAAG	17715	ACAACCTGACCTGAAAGCGG	3549	CGATGCTAAGCCCTGTGAGA	19048
GCAGACCTTTGATCTTCAAG	17449	CATCCGATCTTTAAATTCAG	3527	CTACGTACCCTCCTTTCGAG	18698
CATGTTTATACTGTACACGA	16853	AAGGATAAAGCAGTTAACAA	3473	CGTTACCTCACGCATTCAGG	16486
ACTACACTCTATCCGACCAG	16548	CTATCTCCCTCTTCAACACA	3370	TGAATTTCCTCGAATTCGCA	16371
CTATCTTGCTCCCCTTCCAA	16542	CTGCCTGCCCGGTCTCCCCA	3356	GTACTACCTGATGTGCAGGG	16340
GGGTTCTACCACTTGACAAA	16313	CTTCCCGTTCGCTATTACAG	3349	GCACTTGTAACGGCGTTAAA	16303
CGATGTCCACCATAGCAACA	16208	AAGCACACTCTGTATCTGAA	3344	TTGTTCTATAGAAATATCAA	15356
CTGTTGCACGAGGAGTACAA	15887	CATGATATAAAAGTATTGAG	3256	CAATGGCTTACCATGTTAGG	14788
TTGTTCTATAGAAATATCAA	15732	CAGCCATCATGTAAGAGGGA	3229	CAGTGCACTTCCGTTCCCCA	14700
GAGGCTACTGATCTACCAAA	15617	CCTGCTCCTGGTCATATGGG	3218	CAGGAGAGCCGTTTGCCCAA	14683
CGATACAATTTAGCTACAGA	15544	CGGGCTCCATTCGCGCTGCA	3137	ACTCCTCTCGGTACAAGAAA	14437
CTATTGGCTACTTTAATGAG	15357	CTTAAGAATCCTAATACCGG	3057	CCAATCGGAAGATAAATCCA	14382
ACTGGTCCCATGCATCTAAA	15339	GCTGCGACTTCGCAAACCCA	3025	CTTCGACACATCTTTTTACG	14340
CCGTCGGGACCACAGCGAAG	15201	ACTATTCCTTACCAGTAAAG	3019	CTAGCCTTAACCTAGCCGAA	14236
CTTCAGGGTAATCCATTACG	14797	TTTGAGAACATATTAATCGG	2978	CTGTTGCACGAGGAGTACAA	14085
CTACTCAGCTTCGCGTCCAA	14670	ACTTTACCTAAATTGATACA	2836	CAAATATGCTCAACTATACA	13746
CAAACCTGCTCTGCGTGCCA	14310	CCTACAATTGCTCCTTGGCA	2791	GTTCAAGGATCATTAATCAA	13553
CTGAGCAAACTCCAGTCCAG	14298	CCGAGAACTCTCACTAGCCG	2784	TAGGGCCCTGCGTTAATCGA	13312
CTAGTCTTACTCTTGAGCAA	14191	CTGATGTATTTGAAGCCCAG	2773	TATTCAAATATACTTCCGCA	13037
CCGCTAGTATAAGAAAAGGG	13679	CGATGTCCACCATAGCAACA	2732	CCAGATTGAAACGAGCTACA	13021
CTAAGGGAAACTATGTAACA	13489	CTTTCCTCATTTAAATGCGG	2712	CATGTTTATACTGTACACGA	12983
TAACGCACTAACTCACACCA	13462	ATTGTTCAAATTAAGTAACA	2685	GCACCCATAGGCAAGTCACA	12436
CAGGCACCAAAAACAAACCA	12854	CGAACTCTCCCGGTATAACG	2681	AAATTCACCACTTTGCCCAA	12307
CAAAAAGACACACCGCGCAG	12829	GAGGCTACTGATCTACCAAA	2673	CCTCCACATCACCCTTTCGA	12204
GCGCGCTCCCAATAGCAACA	12812	CCATTGCACCTCCCTCCGGG	2667	CGTCCGTGTTACATACCGAA	12059
ACTCAGCGCGAAACGCTAAA	12798	CATTGACCCTTACTGTTCAA	2666	CTTGCCATCCCGCATCCCGG	11959
GCACTTCACACATAGCGGAA	12782	CTACATCACATGATAAGCAA	2665	CCTACAATTGCTCCTTGGCA	11910
CTGATAGCTTGATAATAACA	12419	CAATATGAACCCTCATTCCA	2658	CGGCATTCTCTGGAGTTACG	11726
TAGGGCCCTGCGTTAATCGA	12224	GCAGACCTTTGATCTTCAAG	2651	CAGGCACCAAAAACAAACCA	11696
CAACTTACCAGGTAAAAAGA	12154	CCAGTTAGAGGTATACACCG	2648	ACTTCTGGACATCTGAAACG	11561
CAGGGAAACTGCGCGTGACA	12138	CCTCCACATCACCCTTTCGA	2643	CCAAAGAGATTCATACAGAA	11419
CGTGACAGCAGCATACTAAA	12070	TTGCCCAATGAGGATCCCAG	2625	CAGGGAAACTGCGCGTGACA	11297
CGGCCTGGCACCTCACAAGA	11672	CCGACGTATAGAACTCGCAA	2616	TGGGGCCCTCTATTGCCGAG	11193
CCGAAGGCAGTGCAGCTCAG	11650	CGTGACAGCAGCATACTAAA	2592	GTATTCTGAAGACATTAACA	11178
GCTGCGACTTCGCAAACCCA	11612	CCGCTAGTATAAGAAAAGGG	2585	ACTCAGCGCGAAACGCTAAA	11161
ACTAGTAGCGACCTTTGCGG	11565	CGGATCAGCTTACTAAGGAG	2581	AAGGATAAAGCAGTTAACAA	11069
CTTGGGCCACGTTTGTTCGA	11488	ACTCGCACATCTATGTACCG	2580	CAGAACCCAAAGCTTATGAG	11051
CGATGGATCACATCGCAACG	11447	TTGGATTCACATGCTAGCCA	2548	AGTGTCGCACCACTACCCAG	11034
CCTTCCTCACTTCCTCGACA	11436	CTTGGGCCACGTTTGTTCGA	2529	AATTAATCCTGGAAACTCCA	10935
CCTTCGCACCACATGTGGAA	11412	TTGTTCTATAGAAATATCAA	2502	AATCCGGGCATAGCAAGGGG	10871
GTGATACACGCGATTAAGCA	11330	CAGTAATTCTGAGAGTAAAA	2499	CGACTTTTTCTGTAATAAAG	10564
ATTTGGGCTATATTGCACAG	11324	CTATTATGCCTGGAAAGCCG	2479	CGGCCTCGATAACAGAGGCG	10516
CAGCCATCATGTAAGAGGGA	11321	CGTAGTAACGAGTCATCAGG	2471	AGTATATTCTCGTCTACGGA	10434
CAGTGCACTTCCGTTCCCCA	11231	CAACCAATTTGAAAGATCCA	2470	CAATCTCGTTAGTAACCCCA	10223
TAAAGACTATGACCACCCAG	11129	CTGGACACTGTATCACCGGA	2434	CTACCCATCCGAATTTGCGG	10170
ACTATTCCTTACCAGTAAAG	11035	CCTGAGCGTGGACCGCCCAA	2422	TCTCCCAATAGGAATACGCA	10020
CGTACCTATAAACCTTTAAG	11031	CCGACCCTTTTTCCAAGGGA	2419	TTTTGTCACGAGGTACTCAG	9988
AAGCACACTCTGTATCTGAA	10953	TGGCCCTTTGTGTATTCGAA	2388	CTATCTCCCTCTTCAACACA	9980
CATCTAAGAACCACGTTACA	10905	CCGTCGGGACCACAGCGAAG	2372	CAATATACTTGACCGCAAGA	9936
TGGGGCCCTCTATTGCCGAG	10900	CTGATGATTACCCCGAGGAA	2356	TAAGACCCTATTCTTCAAGG	9933
GGGTCGGTCTGTTTATTGCA	10869	GCGTCATTAAGTCAATCAAG	2331	TCGGTTGTAGTGATTCTAAA	9859
GCTAGCCCCTACCAAACGCA	10844	TCGCCTCACTACCATTCGCA	2330	CCTGACCTCCTCACATCCGG	9802
CGGGCTCCAGCTGCAAGACG	10772	CGATAATGACCTCCACAGAG	2319	TCGGCTTCTCATACAATAAA	9698
AATCCGGGCATAGCAAGGGG	10743	GCGGTTTGCAAATTGTGAGG	2315	CGATACAATTTAGCTACAGA	9695
CCAGATTGAAACGAGCTACA	10722	CTACTCAGCTTCGCGTCCAA	2309	CATGATATAAAAGTATTGAG	9638
GCACTTGGATTGCTAACAGG	10722	CTTGCCATCCCGCATCCCGG	2304	ACTACACTCTATCCGACCAG	9567
CTACATCACATGATAAGCAA	10709	CAACTTACCAGGTAAAAAGA	2296	CTTGCTTGTCGCGTTTAAAA	9513
CGATGACAAAACGATCTCCG	10687	ACTGTACATGGCCAGATCGA	2292	TTGACTACATGGTTACCCGA	9362
CCGTGATGCCCATTACACAA	10673	CAAGGGGCCTAGACTACAAG	2286	CCAAAAAATAGCATAAGCGG	9340
CTAGACATTACGTCGACCCG	10545	CGATACAATTTAGCTACAGA	2276	CTGCCTGTTGCCAAAAGCAG	9302
CATCTTGATTGAGTGACCGG	10464	CCGCCTAGCAACGATATCCA	2258	CAACCTTGCCATATGTCGGG	9283
TAACAGGGAAGGGCATCCGA	10463	CTGCATTTAATGTCAACCAA	2252	ACAGACAACCGTACTTGAAG	9283
CAATATGAACCCTCATTCCA	10400	AATCCGGGCATAGCAAGGGG	2242	CAAGAAACCATCCCACCAAA	9281
CAATTTATTCACCTGTCCAG	10308	CCGACCAGAACCCAGACACG	2242	CGATCCGTTACGGCTCTGAA	9251
AGTAGCACAACGCCGCACAG	10208	CAAACCTGCTCTGCGTGCCA	2227	CGTACCTATAAACCTTTAAG	9231
CAATGACCTATTGCACTGGG	10140	TGATCCAGATAAATGTCCGG	2225	ATGGAAACACGCTTTAAGGA	9210
CTATCTCCCTCTTCAACACA	10136	AAGTAAGAAAGAACTTGACG	2218	CATTTAAATCTTAATAACCA	9200
CTTGATACTTCCAAAAAAAG	10122	AGTACTCCTGCAGAACTAAA	2214	CCGACCACTCGGATTAACAG	9179
ACTACTGAAAGTACGAGCAA	10085	CCTTAGGCAGGGCTTCTGGA	2201	CCAACAACAGTCCATTCGAA	9099
CCTACCACCAAACATAACGG	10076	GGTCCCTGTCATCTATCGAG	2199	TAAGACAACAGGGATTACCA	9062
ACGCCGCTTCTACCAAGACG	9998	ACAGGGATAACATATAGGAG	2180	CCATCCATAACACTGTCAGG	9054
TGAAAAGACCATCTACAGAG	9977	CCTAATCACTCCTTTTCGAG	2176	CGGTTCGGCGACCCAATCAA	9033
CTAAGGAGACGCTCATGCAA	9925	CCAGGGATACCAATGCCCAG	2164	GGGTTCTACCACTTGACAAA	8996
CTTGCAGGCAGCTTGCTGAG	9859	GTACATCCTTACTAATTGAG	2158	CGTAGCCACCACGATATACG	8930
GCAGCCCTACGTGTTCCAAG	9848	CCATGCCCCAACTAATCCCA	2147	CGGGCTCCAGCTGCAAGACG	8867
CGTTACCTCACGCATTCAGG	9835	CCAGCCAACGTAGCTACCCA	2143	TGTACCCGTGCACCGCGGCA	8844
ACTCGAGACTGTGTTCGAAA	9833	CCACGTAAATAACATTACGA	2134	ACGTCCACTTCTCAGTTAAA	8812
CTGTCCAGCATGTATCCAAG	9758	CCTGCCCCTAACGTAACGGA	2130	TTACCGTCAAAACAATTAGG	8748
CTTCGACACATCTTTTTACG	9749	TGGGGCCCTCTATTGCCGAG	2108	CTGACCCTCCCGTTTCCCAA	8738
TCACACCCCAGGCAATTAGA	9657	TGGCATATCGACCCTTCGCA	2103	GGGCAAGGTGCACATCCCAA	8738
CGGGCTCCATTCGCGCTGCA	9646	CGATGCTAAGCCCTGTGAGA	2092	CATGACAGTTCAGCAATCCG	8733
ACAAGGCAAATTTAAACAAA	9627	AGTATATTCTCGTCTACGGA	2091	ACTGGTCCCATGCATCTAAA	8732
CTATACACATCGTCTATAGG	9585	CATCCGTCATCGACTACCAG	2074	CTGATGTATTTGAAGCCCAG	8727
AGGATCCCATCATTTTTCAA	9570	GCTTGTCCATGAGTGATGAA	2071	CGACTCCGCAAGACTTGAGA	8727
CATCGGCAAATTAAACTGCA	9565	CTATACAAACGAATTCAAAA	2070	TGACGAGGTGCTTAAAAGCA	8692
ACGCTTAGAGATTAATGCCA	9536	CAATGGGGCGACAAGTAAGG	2064	CAATCAACCCAATCGAGAAG	8678
AGAAACCATTTAATTCCCCA	9512	ACTACACTCTATCCGACCAG	2061	CTGGCACCACTACATTAAAG	8659
TAACAGATCCCACTTTCCAG	9497	CGTCAGTGATCCCAGCGCAA	2052	CAGTTCCAAATAGAATCACA	8637
CTGCCTGTTGCCAAAAGCAG	9461	CATCTAAGAACCACGTTACA	2030	GTGGGCTCACACCTTTCGCG	8616
CTTAAGAATCCTAATACCGG	9441	CCTGACCTCCTCACATCCGG	2011	CGAATTTGCAAAGCATAACG	8612
CTAATTGCTGTAATTCTCAG	9438	CCAATCTTATGATTATCAAA	2008	TCTCACTTTGTCATATCCGG	8605
CGGCATTCTCTGGAGTTACG	9424	CATACAAATAAATTATAAAA	2007	AATGTCTAACCTAAGTTGCA	8594
AGGGGCGGCCAGTTATGCAG	9409	CGGCCTGGCACCTCACAAGA	1977	ACTACTGAAAGTACGAGCAA	8562
CCTCGTGAAGAACCAATACG	9399	TTACTGGGAAACTAACAGCG	1973	GCATCTGTTAATCATACCCG	8553
GGTCCCTGTCATCTATCGAG	9397	CAGATATCCAGTTCACACCG	1968	GCATTGCGATTAAATTTGAA	8549
TATCCAATCCGGCAAAGGAA	9393	CTGCAGGCTTCAAAGCGACA	1958	ACGGAGTTACCATAGCACGG	8545
ACTTTACCTAAATTGATACA	9386	CGTTCCCAACATCAGCAACA	1944	CCAACAAATATATTTCCGCA	8530
AAACATAAAACCAATTCCGA	9382	CCACACATTCCCGAGTCCAA	1941	CAGCCAGACAACAAAAACGA	8502
CTTATATACCACACTCAAAA	9376	GCAGGTGCCATGCCTAAACA	1937	CCTGACTACCTTATGCTGAA	8470
GTAGTTCGATCAGCTCGACG	9358	CCGTGGTCCTCCGATCACAG	1933	ACGGCTCATTACACATGCAA	8440
ATTGTTCAAATTAAGTAACA	9299	CGTGGCCACTTACCACGGCA	1928	GGTCAGCGACATTAACGAAG	8426
ATAGGAATCTGTTTATTGCA	9264	CAAACCATACTGAAACCCGG	1923	AAGGCCCGTCCTACTAAGGA	8423
CTAGGATATGGGATGCAAAG	9238	CAGGCACCAAAAACAAACCA	1922	CCTCCGTTCACAGATACCCG	8421
TTGGGACGTCTGACACTGCA	9203	CTGGTATAATTACCTAGGCA	1919	AGAAACCATTTAATTCCCCA	8406
CCTATCAGATTACAGATCCG	9189	CCGAATAACCGTCAAAACCG	1919	CGGTGAAATCCCATTCAGAG	8401
CCATACTTAAACGTACTCAA	9156	CCGGCTCTCGCACAGACACA	1917	CGTCACTCCACGCCACAACG	8400
CAAATTACTGACCAACGCCA	9137	CGGGCTCCAGCTGCAAGACG	1914	CAGGCCTCAAACTATAGACA	8393
CGAGCCTCCCATAAGTCACG	9112	CATCCTCGTATCCTGTGAGA	1914	ATTAGGGCCAGTCTGACCGG	8391
CCGAATAACCGTCAAAACCG	9096	CATAATTGATCGGTACACAA	1909	CAGGATGCCTCCTAATCACG	8362
CGATGCTAAGCCCTGTGAGA	9085	GAGGCCCAACCCTCACGCAG	1909	GGAAAATAAAATCTACGGCA	8346
CTTTACCAATAGCAGAAGAA	9079	CAACTACTCCTTTAACGAGA	1905	ACGTTCTATCTACTACCAGG	8339
AATCTACCATTATTTATCGA	9079	AAAGGGATCGTGCTGCTCAA	1903	CATCTTGATTGAGTGACCGG	8332
CCGCGAATTCGATAGTTCAG	9070	ACTAGTAGCGACCTTTGCGG	1902	ACTAGTAGCGACCTTTGCGG	8324
TTTGAGAACATATTAATCGG	9045	GCGGCATTCGGCGATTCCAG	1898	CATTTCACTGTCAAGCCACA	8323
CGTGCCGGCCGGCCGATAAG	9019	CGATGGGCCCGGTTTTGAGG	1897	CGAACGGTAACTCTAACCGG	8294
CTGATCTCAATGATAAACAG	9007	CGAGCCTCCCATAAGTCACG	1897	CTACTCCTTGTTGAAACAAA	8287
CCTCAGGTCGTTCTTCACCA	9002	CGGTAATGATACCCGTCACA	1888	CAACTTCCTGACGTTTCACA	8283
CCTCTAGTCGCATTGAGGAA	8998	GCACTTGTAACGGCGTTAAA	1884	CAATTTACCCATTTTCCCAA	8277
CAGTGCAACTGTGATTACCA	8908	CAAGGCGATCAGCTGACGAA	1882	CAGACTCCATCGGTGTACCG	8261
ATAGTAATACGGACAAACGG	8825	CCGGCTCTTCACTTGTCGCA	1879	AGTCGGGTTGCTTAACGAAA	8255
AGTGGACGATTTAAATCCCG	8805	CGACGGCGATTGCATTGGGG	1868	CATTGAGATAAACATCAACG	8255
GTTCAAGGATCATTAATCAA	8767	CGTGCAGGCCCCTAATTGCA	1867	TAGAGGGACTACGCGTACGG	8238
CCGCGGCTCAACTCACTAAA	8745	TCGCTCCTCGCTAATCCCCG	1862	TGAAAAGACCATCTACAGAG	8231
CCTACAATTGCTCCTTGGCA	8727	CAAACCCCCGCCAAGTACGA	1852	CAATGACCTATTGCACTGGG	8223
GATCGATGCCTAACAATCGA	8708	CTACACGCCCATCTATTGAG	1838	AGGGGCGGCCAGTTATGCAG	8205
GCGAGTCACTGGTAAACGGG	8693	TATGGACGATAGTAAACCAG	1837	AAACACTCACCTGAAATGCA	8202
CTATATGAATAACCGCGCGA	8687	CTTTGACCACATTATTAACA	1836	AGGGTTCGAAAACAGATAGA	8193
CGGCCTCGATAACAGAGGCG	8677	CAGTCCCACACTCCGTTCCG	1832	CTTAGAAGTCATATTAGCGA	8185
CAATACTACGTCTTTCCGCG	8661	ATTGCCCAAATACATTGACA	1831	CGAAGGTTACGCTAGCGAGG	8183
CCACCGATTTATGTGTCGCA	8655	CTGTCGGGTACAGTTTTAAG	1830	CCAACAGGCCAACTTAACAA	8170
GGTACACTCCAACTATCCCA	8652	CGATGACAAAACGATCTCCG	1829	TGGTGTAAATCCGCAACAGG	8163
GGATACCCAGGTAATCACCA	8637	CAAAGTGCTAGATAGCCCCG	1829	GGTTAGAACGGCCCACGCAA	8156
CCTGACCTCCTCACATCCGG	8616	CCTCGTGAAGAACCAATACG	1826	CGTGAGCATCGCAAATCAAG	8127
TGATAAAGCAGGGCACTCAA	8598	CTGCTACATGGCTTGATAAG	1825	TAACAAGGAACGCTTCCGGG	8120
CTGTAACTCGATGCAATACA	8581	CAAGTCGCAACGACGCTGAG	1825	TAATGTGGATTCCCATAAGG	8107
CTGCCCTCTGCAATGAAACG	8559	CTATTATTAACTTATTCCGA	1825	TTTCATGATAACACTTTGGG	8103
CCAAACACTTGACATCCACG	8556	ATAGGAATCTGTTTATTGCA	1823	CTGTGCTGCGCCAATAAGCA	8087
CCACTCCCCGTGTTTTACGG	8526	CCTCATAAATACTAACCACG	1820	TCACCATATCTAGATAAAAG	8082
CAATGGCTTACCATGTTAGG	8515	CCTTAGCTCCTTCTACTAGA	1819	CGGCGGCGAGACCATTCGAA	8069
ACTAACCACGTGCAGACCCA	8488	CGAGTCGGCATGTCTAGCCG	1818	ACACTCGGCAGGTATATGAA	8050
CTTCTACGTCACTAGTCAAA	8476	AAGCAGCACAAAACGCTCAG	1814	GATAACAACAGTGTTCGGAA	8045
CCACGTAAATAACATTACGA	8470	ATAGTCCATACCGCTTCAGG	1812	CTTTGGGAAATAAAGCAAAA	8028
TCTTCTGTACGTGAATGCAA	8463	ACTTTATATTGTTAATCCGG	1812	CGTAGCCAAAGGGATCCAGG	8020
CGGGTCCATATTCCAACGGG	8447	CAATTCATTCAACAACCAGA	1811	CAACTTACCAGGTAAAAAGA	8004
AATGTCTAACCTAAGTTGCA	8443	CAATGACCTATTGCACTGGG	1808	ACTTTACTCACGAAGATACA	7979
TTAACCTGTGTGTAGCCGAG	8421	ACGCCGCTTCTACCAAGACG	1806	ACTATTCCTTACCAGTAAAG	7971
CCGGCACCCATTCATCAAGG	8403	GAGCTTTGAGATCATACAGG	1805	TTTGAGAACATATTAATCGG	7943
CTACACACCCAACAGTTCAA	8388	CCACAAGCTCTGCATTGACA	1800	CTTGATACTTCCAAAAAAAG	7932
ATGGACCGTTTACCTCTGCG	8386	CAAACCCGATCGGTATCACG	1798	TCGGGATATAATGATACGCG	7907
CATCCTCGTATCCTGTGAGA	8342	GCATGTACCTGCCAATCACA	1796	CTAGCCCACTAGACGTCAAG	7901
TGAATTTCCTCGAATTCGCA	8328	GTGATACACGCGATTAAGCA	1795	CAACGGTTTCCGAAGCAGCA	7900
CTGCCTGCCCGGTCTCCCCA	8251	TCATCGGAACCCCCTTGAAA	1790	ACACAGGGCCACATTCTAGG	7885
CGATCAGAAAGCTAAAGAAG	8233	CATGCATGACCAATAACAAG	1783	AGTGAAAACCTACCACACCA	7878
CCAGGCCCCCGGTATACACG	8219	CCAGACACAGCTCATATACA	1782	GCACTCTCCTGACAGCCAGG	7875
GCACCCATAGGCAAGTCACA	8213	GGAACATCTATTCTACTCCA	1780	CCTGACCGTAGGCCTTCCCA	7871
CAGTAATTCTGAGAGTAAAA	8210	AGAGTCACCATCCCGAAGGG	1779	TAATGAACCCCAATACCGAA	7862
AAGAATAGCCTATAGCGAAG	8201	CAAAAAGACACACCGCGCAG	1773	AATAAATGTCTTGAGAACCA	7861
AAACTCTTTATGAATTAGGA	8196	CTTATTTATACCCCATTAGA	1771	TCTGAATCTTCGGTTCACCG	7824
ACACAGTCATGCTCTCAGGA	8146	CGTTAACTACTCCTAACAAA	1770	CCTATATTTAAGTAGTTAAA	7818
CGTCCGTGTTACATACCGAA	8143	GTTTCGCACACTTAAACAGA	1769	CTGGGACATGTGGCGAAAGG	7816
CCAGTATGTTCTCCTAAGAG	8117	CAGAGTCCCGCGCTATAAGA	1767	ACATGTCAATCCAAATACAG	7813
CTACAGTAACAACTATAACG	8112	CTAGCCTTAACCTAGCCGAA	1766	CCTGCCGTCATTATTCACCA	7805
CGGCGGCGAGACCATTCGAA	8101	CTAGAGTTTCAACTGCACAG	1766	CCACGCATCATCGAGAGCCG	7795
AATTGTCCTGCGCTATTAGA	8070	AGGAGGTCCACCCTAATAGG	1765	CTAATACTTGAGGAGTTCAA	7786
ACGTCCACTTCTCAGTTAAA	8066	CTATTGGCTACTTTAATGAG	1764	CGTGATCCCCCCTCATGCGA	7781
CTGAAATTTCCATAACACGG	8034	CCTATAGAATGAGCTAACAA	1764	CATAACACACCTACGACCAA	7769
CATGATATAAAAGTATTGAG	8030	CTAGGAGATATAATGATAAA	1763	CAACGGGTCTCTACATACCA	7764
CCGACCAGAACCCAGACACG	8019	CCAGTTCGTTTAGTGACGGG	1760	CAGAGTCGTGAGCCACTACA	7762
GCTGCCTAATATCCTACCGA	8013	CTATCTTGCTCCCCTTCCAA	1756	CTTGGGCATCCGCCTTAAGA	7760
CAATCTCGTTAGTAACCCCA	7978	CTGTTCTCAAGCGTTTCAAA	1756	CATTCGACAGCCTCTAAGCA	7720
CCTCATAAATACTAACCACG	7966	CTGGGCATTTACTTGCCAGA	1754	TCTAGCTTTCTTGATCACAA	7718
GATCAGCGTTTCACGCCGCA	7952	CTGTACTTTGGCATTCCACG	1753	ACGCCCTGTTATCAATCCGG	7717
CAAATATGCTCAACTATACA	7923	CTGCCAATAGCACCTAAAGG	1752	CCGGGGCCCCGCATACACAG	7702
CTGCCCCGTACGGCTATCAG	7836	CTTACGTCCCTGCATAGCCG	1751	CTACTACAAGGGCATTTCAA	7686
CGGAACGACTTGGTTACAAA	7775	CCGGGTTGTACGAAGCCCCG	1750	CTAGTCGATCCGCTTCGGGG	7676
TATTCAAATATACTTCCGCA	7774	CTATATCAAATTCTAACAGG	1746	TGTGCAGGACCAGAGCCCCA	7631
CAGCACACTCAAAAGAGCGA	7717	CCTGCCGTCATTATTCACCA	1746	AAAACCTTTGAGACGTTCGA	7627
TTAGGAAAATTTACACTGCA	7704	CTTATACCAACCCTACTCAA	1745	CGAGCCTCCCATAAGTCACG	7590
CAACTCCGATCCGCAATGCA	7704	GTTTCAGGATTTTTTCGAAA	1745	TTAACCTGTGTGTAGCCGAG	7579
GGTGACATCTCCACTAACGG	7693	CCGTCCTACGCGCTTTTCGA	1744	CCTCATAAATACTAACCACG	7578
CCGCCTGTATCCCTGAGAAG	7684	TGACCCCCCACAGTGCCGCG	1742	CAAATCGGCCCGAAGACCCA	7577
CCACTGGGACCCTTGTGCCA	7665	CATCCCCCTTTTCCTAACAG	1741	GATGTAATCTGCATTCGGGA	7546
ATAGGCCAAGTCCTTCCGGG	7663	TAAGTCATCACATAAAAGAG	1740	AGAAAGTTTACGAAGACAAA	7535
GAGGTGCCCTACATGTAGAA	7616	CAGTGCTGAATGTCACCAGA	1740	ACACATGGTCCGCTGCCGAG	7535
CAGGCATCCAGGTCAACGCG	7576	CCACGGACATTAAATCCGAG	1740	TATCCAATCCGGCAAAGGAA	7535
AAGGTATCCATGTATCTGGA	7560	CGGCCTCGATAACAGAGGCG	1739	TAACAGGGAAGGGCATCCGA	7501
CTGTATCTACGCCAATAGGA	7546	CATCTTGATTGAGTGACCGG	1739	CCGACCCTTTTTCCAAGGGA	7483
CATTGAAATCTGTAGTGACA	7535	CGATCGCACAAATTTCTAAA	1737	CCTGCTCCTGGTCATATGGG	7480
ATTGGTACTCCGGTATCACG	7522	ATTTGGGCCGTAAAATCGCG	1735	GAGGCCCAACCCTCACGCAG	7460
CAAACCCCCGCCAAGTACGA	7505	CTTTACCAATAGCAGAAGAA	1734	CGGTTCCCATTTAATAAGAA	7427
AAGGTAGCACATGCGTCCAA	7403	AAGGTGATTTAGATACTCGG	1732	CGTGCACTTTTCACTAACCA	7421
CCATCAGTCCCGTCGATAAA	7350	CGTAGGTGCCGCTAAATCGG	1732	CGTCGATCAGAAAAGCTAGA	7400
ACTGCTCCCACTCCACAACA	7320	AAAGGCTCACATCAGTTACA	1730	CCTACCAGTGCACAGACAAA	7396
TCGCCTCACTACCATTCGCA	7317	ATGGACCGTTTACCTCTGCG	1727	GAGGGGAACCCCGTGCACAA	7355
ACACCTCAAAACACGCCGAG	7307	ACACGGGATACTAAATCGCA	1726	ATTAATCCCGCGGAATACAG	7317
CATCCGATCTTTAAATTCAG	7299	ATACGTAGACCCCCACGCAG	1726	TCTTCTGTACGTGAATGCAA	7304
GCACATGACCGTCATTCGAG	7291	CTGAGCAAACTCCAGTCCAG	1720	CTTGGAGACAGTGCGATCCG	7290
GCGGGCTTCGAACAACGCCA	7286	CCTCCCCCTAGGGATTTCAG	1720	ACAAGGCAAATTTAAACAAA	7280
TAATGTGGATTCCCATAAGG	7262	GTGCGGGTATTTCTGCGAGA	1718	CATCGATGCCAAATGCCACA	7256
TCAGGGTTTAAATCATTCCG	7247	ACGAAACCAAAAATTCTGCA	1715	CGGCGTAGCCTGCCTATGGA	7253
AATTGGCACCGGATATTAAG	7243	CATCGTGCAATAGTGCAGGA	1715	CTGCGGTCTCCCCAACTGGA	7247
CTGGCACTACCACAATCAGA	7213	GTTAACCAAGCCACGAAACG	1714	AAATCAAGAACTTAACAAAA	7246
CCGCGCCGACACTAACACAA	7209	GTTTGGGCAGCGGATCAAGA	1713	CGTATCGCCATCTAGTACCG	7212
CCATGCCCCAACTAATCCCA	7208	AGTGGACGATTTAAATCCCG	1712	CTGGCCCCCAAATCAATCCA	7205
CTGTGCTGCGCCAATAAGCA	7197	AGGATACTTGTGGCGTCAAG	1705	CTTAAACCCTCCTTAAAGAG	7203
CATAGTGAACTCGTTCACAA	7181	TGGGGGAGTGTTGAAAAGCG	1696	GTGTACAGTATAGAATGAGA	7173
CCACGACCCCCGGATTCACA	7169	AATCCTTCTTACATAACACG	1696	GAACTGATTGCGAAGACAGG	7168
CTGGCCCCCAAATCAATCCA	7159	CTTGGATATACCTCAAAACA	1695	CTATTTTTTTAATATTGAGG	7080
CAAGTGCTTCTTCAACAAAG	7150	ACTTACTTCCATTTTCCACA	1695	CGAAACGACTGAATAAACGG	7075
CTTTCCTCATTTAAATGCGG	7146	CCATAGTCCCTGAAGCAGAG	1693	CCAGTGTTATGCTTTCGGAG	7061
CCGGGTTGTACGAAGCCCCG	7145	CTTAAAACATGTGCTACGAA	1692	CCATCAGTCCCGTCGATAAA	7051
CTATAGAATTAGTAGCGCAG	7093	CATCCCATATATCTTAACCG	1689	CTTCGGCATCTAAAATGAGA	7041
CCGTTCTTTATTGCTCGCAG	7071	CCATCCTTTCCATCTTTAGA	1684	GGGGCCGGATTGGCAATAGA	7002
CCAACGTCCGACCCACGCAG	7070	CCATACTTAAACGTACTCAA	1683	CCGGTCTCATTTTCTAGAAG	6992
AAGCGGGGTTGATAAAACAG	7040	TAGGATTGCCTTGTATCACA	1682	CCACTATGATTGAATATACA	6981
ATAATAACCGTGTATCCAAG	7019	ACGCTTAGAGATTAATGCCA	1682	CGAGTCATTAGCACACGGGG	6922
CAATGTTTCATTGATTGCAG	6987	CTTAGTCCTACCATACTCAG	1681	GTTTACACCTGCGCTAACAG	6913
CGTTGCAAACCACTACTACG	6950	ATACTTGCCACAAAACTCAA	1679	ATAGCTCCACCCTAAAGGAA	6912
CTTGCTTGTCGCGTTTAAAA	6936	AGAGCGGCAGTCCCGTTCAA	1678	CCACTGGGACCCTTGTGCCA	6868
CTTCCGATAACCCTTCCAGA	6935	CTGAAATTTCCATAACACGG	1678	CCTCAGGTCGTTCTTCACCA	6851
AAATCAAGAACTTAACAAAA	6932	GGGTTTAACGGCCAGAACCA	1675	ACAGGGGACGGCAAGTTACA	6849
CATCCGTCATCGACTACCAG	6898	CTGACCTAAGCACTGTGCAG	1675	AGTACTAAAGATATTTCAAG	6829
CAAAGGTGAGTGAATTTCAA	6883	AGTACTAAAGATATTTCAAG	1674	CAGGCCTTCAAGGATTGGAA	6812
TTAACCCCTGTAACACCCCG	6859	GGGATCGACAGGATGATGAG	1669	CATACCACATGGGTTTTCAG	6809
CAGATATCCAGTTCACACCG	6838	CGACGACCTGTCTTACAAGG	1668	CCTTCCTCACTTCCTCGACA	6806
CTGCTGCTCCTATCGATCGG	6820	GCTCTGCGATAATTAATAAG	1666	CAACTCCGATCCGCAATGCA	6784
TCTGTTATCAGGTCACCAAA	6811	AATTTGGACAGGTAGTCGAG	1666	CAATTTATTCACCTGTCCAG	6780
CATTTCCATAAAGTTCTCAA	6810	CCTGCCAGAGTGTTTAAACG	1665	ACTTCCGCATGATAACACGA	6780
GCGGTATCAGACAATAACAG	6774	CTATCAATCAATGATTCCGA	1664	CGTACAACTGCCTATTACGA	6771
CCACGGCACGTACTACCAGG	6746	CCAAACATTCTAGTACCCCA	1663	CCAAACACTTGACATCCACG	6751
GAATGAAACACGACATAACA	6721	AATTAACATATAGTGTTGCA	1661	AGGAGGTTCTATGATCACCA	6744
CTGTAATGTTTATTACGCCA	6693	CGGCCTATAATCAAACACCA	1661	AAACATAAAACCAATTCCGA	6739
CTGTGAGCTATAAAATACAA	6672	TCATAAGCATTCCATCTGGG	1657	CCAGGCCAACTCAAGCCCAA	6734
CTTATTTATACCCCATTAGA	6628	CTACCGAGAGTATATTTCGG	1657	GATTCGGGACCACATTAACG	6727
TGATCCCCTCCCGATAGACA	6616	TAGCGGAAAAACCATCACAA	1655	TAACGCACTAACTCACACCA	6672
TTGTGGACACAAGTACCGAG	6592	ACTTCTGGACATCTGAAACG	1652	TCAAGTAAAGGTGTGCACAG	6662
CTTATACCAACCCTACTCAA	6564	CCGATCAATCTTTTTTAGGG	1652	TTTATACGTTTAGATAAGAG	6651
CTGCACTACCATTAGACCGA	6548	CTAGAAGTATTCGAGCTCAA	1649	TAGGGATTACGTCTATCAGA	6645
GGATGGAGACAACTACGAAG	6545	AAAGTGTCTGCATTGAAACA	1648	GCGGCAGCTTACGAATAACA	6638
CTTAACTTACGGTCTTGCAG	6530	GCAGCATTAAGTTTGCAGAG	1648	CAGTACAAATCCTCGCTGGG	6634
ACAGACAACCGTACTTGAAG	6530	CAATGGCTTACCATGTTAGG	1648	CTAAGAAACGAACCATACAA	6612
CAAATCTCCACGTCTACCCG	6529	CATTTACTTTGAAATCCAGA	1646	CATAAATCATTTGTACACAG	6601
TTAGACCGTACACCACACAA	6529	CCAGTCATATACAAGCTAAG	1645	CTTTATAGTTGTCAGTTGAA	6595
TTTTTCATACTTTATACCCA	6526	CAGTTTCACTTTTCTCCCAA	1643	CAGTCCCAAATGACACGGCA	6589
CTGATGTATTTGAAGCCCAG	6515	ATTTTGCCAGGCGCTACGAA	1642	CGTTGCAAACCACTACTACG	6588
TTAACGACAATGATAATAAG	6509	TGACTCACTTTTCTATTGGG	1640	TAATTCGCCGGTACTTCGAA	6581
CCTTCGATACAAATTCCGAG	6508	CTATATGAATAACCGCGCGA	1634	CGGGCATTCTCCCTGCCACA	6574
CGTCAGGCCAGAAAGACGAG	6507	CTGCTACGAGCAGTAAAGAG	1633	AAAAGAGCCCACGATCCGAG	6535
CTGGACCACATTGCAAGAGA	6491	CATCACCTCTTCATTTGGCA	1632	GTGTAGCTCCGGAAACGCAA	6524
ATGAACGCCGCAGCTAGCCA	6454	CGGGATACACCGTTTCTAAA	1627	CCAACGTCCGACCCACGCAG	6503
GGTTAGATCTTGGCGCCGGG	6450	GCGAGATAACCTCTGTTCAA	1627	GCAGCCCTACGTGTTCCAAG	6502
CGGTGGCCTCCGACTAGAAG	6445	ACTGCTCCCACTCCACAACA	1623	CGTCTATCCCCGGCTAAACA	6498
CTTGTTTTTAATATTATGAG	6431	GAACATGATTTTGATACCCG	1621	CGAACTCTCCCGGTATAACG	6496
CAGGAGAGCCGTTTGCCCAA	6429	ATATCAACTTTTCCATCGCA	1619	CATGATCTTGCCAATAAGGA	6494
AAGAATAACGTCGTACGCGG	6413	CAGAGTGAATGGCTTTTCAA	1616	AGTCTGGTACCAATATCCAA	6485
GCACTCTCCTGACAGCCAGG	6396	TCTACCTGTGGTATGCTAAG	1614	CATAATTCCTTCTTGCTGGG	6482
AATTAACATATAGTGTTGCA	6390	AAGATTATCCAGAAAATAAA	1611	TGAAGCGACTCCCTTAAAGG	6467
GCGGTTGGCAAAAAACCCCA	6378	CTAGATAATCTGGTAAAGGG	1609	CCGCCTGTATCCCTGAGAAG	6451
TCTTGTCAAGGGGCGAAGAA	6357	TGTCATACTTACCAACAAGA	1606	CTAAAAAGCCTTGCGATGGG	6444
TCTTCGGTCACCGAGCCGGG	6349	CCAGGGTGTTTGAAATCCAA	1604	CCGACGTATAGAACTCGCAA	6440
CATGATGAACGTGATCACAG	6343	AAACTGGGATCCTAGACCAA	1601	AAGCCCCTTGTCGCGATCCA	6389
CATAACCCAGGAATAAAAGA	6327	TAAGACCCTATTCTTCAAGG	1600	CTAGTAGACCCCCCTCGCGA	6383
CTTGCCACTTGTAAAATCCA	6323	CCACACCCTCTTTTACAGAA	1598	CCTAACGAAATGACATTCAA	6373
TTGGGTATAACTGAGTGCAA	6319	CCAAATTGAATGCCAAAAAA	1598	CCGTGTCGTAAATAAAGCGG	6364
AGTTACCGCCTACTAATCCA	6311	TTTTCCACCGCGGAGTTAAA	1597	TGTTCCTTCCATCTACCGAA	6357
AGACCCTACTGTGAGTAAGG	6304	CCAGGTTAATAATTTAAAAG	1597	TCTTGGGCCATACCTATAAA	6338
AATTTGGACAGGTAGTCGAG	6301	CCAAAGCCCCGCGTGATACA	1594	TATTTCACCCCCAAACCCCG	6303
GCTTGTCCATGAGTGATGAA	6297	CGAGCGGGCAGCGTTTGAAA	1590	ACGTGAGTTTCCCTGTTGGA	6301
TTTATATCTTTCTCGCGCGG	6275	GAGATACTTTCCATGACGAA	1589	AATACGCTAGTAGTAAACGA	6277
CCGTGGCCACCCTAGTCACG	6238	CTTCAGTTTGACGAAATGAG	1587	TTGTCAAACCCTGCGCCAAG	6226
CCGCTGCAAGGTAAGTAAGA	6238	GAACAGGTCCTACAAACCGG	1585	CCGAAGGCAGTGCAGCTCAG	6219
CATATTAACTCGAATAGACG	6169	TCAGGTGGACGTCCATAAAG	1580	GGTTCCGAACAGAAAATGGG	6215
CCGGCCCTCGTGTAGCTGAA	6136	TGTGGTAATCCCTAATCACG	1578	GCTGGTTCACCGTAGCTAAG	6192
CAGGCAGACTCGCTTTCCGG	6128	CGTCGTTCAATCCCGTCGGA	1575	ACGGCCCCACCTGTACCACG	6186
CAGGTATTAGAACTATACAA	6119	CGTGTTGACCCCCTTATCCA	1572	GCTACGGATTTCCAATAAAG	6178
CGATATTGTGGTACGTCAAA	6118	CCTGCGCAAACCGCAAAAGA	1572	GCTGCGCGACATGCTTCCAG	6175
CTGTTATATATTCAACCCGA	6112	CTGCAGCGATCCTTGATACG	1570	ACTCGAGACTGTGTTCGAAA	6148
CAAGTGAAAGAACATTTCGA	6098	AGGATATACTCTATAAACAA	1570	CGTGCATTCGCATTGTTCCA	6144
AAGCGGACACAACCAACCGG	6081	CGTCTATCCCCGGCTAAACA	1569	CCAGGTTAACAAAATTCGCA	6143
TCTTGGGCCATACCTATAAA	6065	CGAAGACTCTTCTAAAACAG	1568	GCTAGCCCCTACCAAACGCA	6136
ATACGTGTTCCGTATCTGAA	6064	CCAGCATCAACGTAAACGGG	1567	CATGATCTATAGATTACGCA	6113
CCACACCCACCGACAAAGCA	6050	ACTGCGAATCTTCAGCCAGG	1563	CTAACAGACGTTACATCAAA	6111
GGTACATAAGAACTTCTAAA	6046	TAACAGATCCCACTTTCCAG	1562	TCAGGGTGCTCGTTGTCGGG	6110
ACGATCGTCTACCCAATCAG	6044	CATGTTTATACTGTACACGA	1559	GTATCACAATGTTCTAGGGG	6104
CTTCATGAACTTAAATCACA	6039	ACTTACCATATTTCTTTGGA	1555	CTAGTTAGCTCGTTTTTAAA	6089
CCATCCACAGGTTCTATAAG	6038	AATCAAGTCCAGAAGTTCAG	1555	AGTCACCGAGACATTCCAAA	6088
CCTACCAGTGCACAGACAAA	6034	ACGCTAATATTAGCTCAGAA	1552	CCATCTCCAACCTCTAGACG	6077
TTTGGCGACAGCCTTCCCCG	6029	CGTGACGTAGATACGCACCG	1546	ACGAATTTAACTTCACTCCG	6074
AGAGGCTCACATTCACCGCG	6023	GCTGCAGCCTAGCAAATCAA	1546	ATAAGCACTTCACAAATACG	6072
CCGCGCTGAATAGTGCCAAA	6016	TTTGGTTCAACCCAATCGAG	1544	CTTTCCTCATTTAAATGCGG	6056
CCACGCGATCCAGATAAACA	6013	ACACTGGAAAACCTTAGCCA	1535	TAAATCCTATCCACATGCAG	6048
CGAACTCTCCCGGTATAACG	6004	TCGCAATAAAGGCCTACCCA	1534	CAGCTTACATGATTAACACA	6038
CTGTCCACAAAGGCACACCA	6004	CTGACACACGGGCCTACCCA	1534	TCGGTAATCCAGATAACAAA	6036
TAACAAGGAACGCTTCCGGG	6001	CTTATATACCACACTCAAAA	1529	ATAGGCCAAGTCCTTCCGGG	6031
CCATTGCACCTCCCTCCGGG	5975	CCGTGTGTAGAAACGTAAAG	1527	CCATGGCACTAACATCTAAG	5964
CAGTCCCAAATGACACGGCA	5965	TAGAGTACATTCTTTACAAG	1526	ACGATTCATAGCAAACTAGA	5920
CCACGTACTCATCTGATAGG	5943	TCATTTACAGGACTAATAAA	1525	CGTGACAGCAGCATACTAAA	5889
ACTGGTGGTCAAAATACGCG	5933	CATCGGCAAATTAAACTGCA	1523	TGATCTAGTCGTATGAGAAG	5888
TGTAAGCGATTAGTGTCACA	5932	CGGAACGACTTGGTTACAAA	1520	CTGTATCTACGCCAATAGGA	5862
TAGAGCCTTACTATGAGGAA	5922	CAATAACAAGGCGATATGAA	1520	TTTCAATAATAACCACGAAA	5860
CGTCGATCAGAAAAGCTAGA	5914	CAAGTCATACCCTAATAGGG	1519	TTTCCGGATTCGATATTGAA	5848
AATACGCACCAAGCTAACAG	5909	TGTTAGCGATACCCGCGCCG	1518	TTTCCTATCCCCTCTCTCAG	5830
CCGGGTCCTAGAGTAAGCAA	5905	GTGACTTATGCAACACTCGG	1516	CCGTCGTATTGTACGAGAAG	5828
TCAGGTGGACGTCCATAAAG	5903	CAACGGGATCGCTCGATCAG	1515	CGTTAAAGTGTAATGCTACG	5806
TCAAGTTAAGCGTCTAACCA	5896	CGAAGTGGTAACAATCCCCA	1514	CAACGCAGACAATAGCTAGA	5806
AAACGCCACCAAATTTGCCG	5891	CAAATCTCCACGTCTACCCG	1510	GAGCAATCCAAAGTTAACGG	5765
CAGTACGCCGGGCAAATCGG	5887	CTAAACGGACGCCATCTGAA	1510	CTTTTTGATTTTTTAATCAG	5733
CCTGGGATAACTCTGTACAA	5882	ACTCTGTACACTTTTACGCA	1509	CGGTCTGATGGGGCATAGAA	5724
GGGCTCTATCCCCAGACCAA	5865	CATTAGCCTGAGTAAATCAG	1507	ATAGGCGTAATGCAGTTGCG	5704
CTAAAGTAACACTAATTAAG	5862	CGGTTCGGCGACCCAATCAA	1506	ATTAAGGTTAGACCTCGGCG	5700
CCACCTAGCTACGTGTCACA	5860	ACTAACCACGTGCAGACCCA	1506	GCACATGACCGTCATTCGAG	5690
CAATTCCGACACTATTAAAG	5847	CTTGTACATCCCACACGCAG	1504	CGGATCGTTAGCTATTCACG	5685
GCTTGTCACTCTGTACTAGG	5841	TAGGGCCCTGCGTTAATCGA	1502	CTACTACTTGTACCATGACA	5680
AAATTCACCACTTTGCCCAA	5833	CAAATCCCCCGTCCTTTCGG	1502	CTGTATCTTCATTTATTCCA	5598
CCTTGTCTACCTTTATAGAG	5826	CCTTTCAACCGTGAGATAAA	1500	ACATTTTCCCAACAACCAGG	5559
TTTCATGATAACACTTTGGG	5809	ATTGGTACTCCGGTATCACG	1494	AAGGTATCCATGTATCTGGA	5542
CTACTAGATTTGCTTCTGGA	5756	ACAGAAGTACAGTTAAGCCG	1493	GTTTCAGGATTTTTTCGAAA	5537
TTATCAACAGGGCCTCAACA	5749	CCGCGCCGACACTAACACAA	1471	ACGAAGATCGCCACACCGCG	5516
CCTAAGGCAACCTTGTACCA	5747	CAATCGCTTTAATCTAAAGG	1470	CTGGACGAACTACCTCTAGA	5490
TCACGACATCAAGAGCGCAG	5738	CCGAAGGCAGTGCAGCTCAG	1469	CATACAAATAAATTATAAAA	5472
CGGTAATGATACCCGTCACA	5731	CTGATAGCCAACCTGCTGGA	1465	CGTCACTTACTGAAGTGGAA	5411
CATTTGCGCGCAGAGATAAA	5731	CAAATATGCTCAACTATACA	1464	CTTCTTTACCCTATACGGGA	5381
CTAGTTCGTTGTGTGCGAAA	5716	ACTGAGGGAACTGTTTTCAG	1464	AAAACACACTGGTAACGCGG	5295
CTGACAGCCCGCAAATAAAG	5712	CTGGATCTTTCTTTTCAAGA	1459	CGTTACCGAGCCTCTCCCAG	5276
CCTAATCACTCCTTTTCGAG	5707	GGTGACATCTCCACTAACGG	1456	ACAGGACGTTGTTAATACAA	5260
TGTCGTTGAGACATATGGCA	5705	CTAAGCGTACACGATACGCA	1454	TGTAAGACCGCTGAACTCCA	5244
CTTAGAAGTCATATTAGCGA	5692	GATTGAAATCCACCAAAGGA	1452	CCGGCACCCATTCATCAAGG	5229
GTTAAGCTTTGCCATAGGAA	5682	ATACGGGAATACGTGTGACG	1448	CTTAATAAATTGCTTACAGA	5165
ATACCGTAACTACTAATCAA	5681	GAGTGTAGTAACGTTTACAA	1447	AAATTTATCCTAACACAACA	5150
CCAACTCTAATGTTGCTCAA	5659	CATTAACTCGGTATGCCCCA	1443	ACTTATTAAACCTAGTTACG	5135
AATATCTTTGTATCATACGG	5650	GTTTAATACGAAGTACGCGA	1443	CTAGGTGACATCAATTTGCG	5119
CCTATTGTTAAGGTGACCCA	5644	CCGCGGCTCAACTCACTAAA	1442	TAAAGACTATGACCACCCAG	5112
CTAATACTTAGGAAGCCGAG	5637	CTAATGACCGGACAAAGCAG	1438	ATTGGTACTCCGGTATCACG	5072
CTGCGGCCATACCAACCACA	5632	CTGATAGCTTGATAATAACA	1438	CGACGTACCACACAACCACA	5059
ACTCGCACATCTATGTACCG	5626	CTTTCCTACAAAAATATACA	1436	CGGGCGGCACGTTTACAGAG	5036
CCAAAGAGATTCATACAGAA	5618	CCGGGTCCTAGAGTAAGCAA	1435	TTGTTATTAATCCTACTAAG	4995
TATTGACCACATGAACCCGG	5605	AATTGTCCTGCGCTATTAGA	1431	CGACTCCTAATTCAGCGCAA	4959
CTGAGGGGCGGGAAGCGGCA	5590	TCAGGGCTCCGCGCGAGGGA	1429	CATTCGATAACCAAACCCAA	4947
CTTAGGCCTATGTAAAGGCG	5583	ACTAGCAGTAACCCGCAGAA	1429	TTAACCCCTGTAACACCCCG	4941
CGACGGCGATTGCATTGGGG	5582	TCTCCCAGCCCCGTGCGGAG	1420	TCAGTGGTTAGGATGTCGCG	4917
CCAGGTTAACAAAATTCGCA	5556	CGGGAAACATTTTAACTGCA	1418	TCTGATTCTTCGAAAATACA	4916
GGTAGTGCCGATTCACGGGA	5530	CTAAGGGAAACTATGTAACA	1417	ATACGTTACAACACGTCCAA	4896
CCGCACACCTCCCTTACACG	5529	CTACATAATGCAATACAAGA	1417	CTGTCCTATGTCCTTATACA	4894
CGTTAGCGTTCAGTGTAAAG	5525	CTTCTAACCTGATTACAGAA	1416	ATGCCCACCCCCATGTCCAA	4893
CCATTGACCGCCCCAATCGG	5524	TAAGGTCTACTTACATTAAG	1414	ACTAACGCCACCGAGCTACA	4890
CTTGTTGATTATTTGCCCCA	5522	CGTTACCGAGCCTCTCCCAG	1413	ATGGGGCTTGTCGCAACGGG	4874
CTATCGGCAGTCCATTTCCA	5512	TTTATATCTTTCTCGCGCGG	1413	ACTGTCACAACCGTGTACGG	4873
TTAAGAACATGCCTTACCAG	5501	CAACTCCGATCCGCAATGCA	1411	GAGCTCTGCAGTCCTCAGGA	4854
GAGGCCCAACCCTCACGCAG	5497	CATTTCCATAAAGTTCTCAA	1411	CCATACATCCCGCCGAAAGG	4846
CATGCGACCCCTGATACGCG	5495	TCACCATATCTAGATAAAAG	1410	CTGGTTGGCCCTACACAAGG	4844
GAGCATAAATGTTATAGCGA	5494	CTTCCCACCACAACTTTCAA	1407	TCGGTACTACGGCAACTCAG	4841
CGACCGGGCCAAATAAGGAG	5472	CTACCACCCGACCTGCAAAA	1407	TATATCAACAAACATTCGGA	4841
TTTACCTTTCCATATACGCA	5471	CCAAACACTTGACATCCACG	1403	AAACGTCGCGCGTCGTTACA	4837
AGAGTGGACTGTAATTGGAA	5466	CCTTTCTCAAGTGCTACCGG	1402	CCATCCCCTCCCGCAACAAA	4832
GGGATCGACAGGATGATGAG	5453	ACGATGGGTAGAACAACAGA	1398	ACGTAGCCTCTGCATTGAGG	4831
AGAGTCACCATCCCGAAGGG	5450	CAAGTGCTTCTTCAACAAAG	1398	CCGTGAGTTTACCTACCGGA	4824
CGAACGTCAGTCCCTATCCG	5448	CCAGAAATCGCAAATCTACG	1394	TAAGTCCACGCAGTAAAGGG	4824
TATGGACGATAGTAAACCAG	5446	CCGTCCCGAACCCTGATACA	1393	TTGGACACCGAAGCATAACA	4823
CTACCTAAACCCAAACGGGA	5440	TGGTGCTAACAGGATCCCAG	1391	CATGGTCAAGCCCCGCCGCA	4819
ACTTCTGGACATCTGAAACG	5432	TAAAGACTATGACCACCCAG	1388	CAGCCAGGCACCCTGACCCA	4816
CCATCAAGACGTGATAGCAA	5425	CTATGCGATGAATTGACGAA	1379	GCAGACCCTCTGATAACGAG	4812
CCTCCACATCACCCTTTCGA	5425	AAATAATTAAGAAAATCAAA	1377	CATCAAAGTTATAAGACCAA	4809
CCTGCCAACCCTATACGCCG	5406	CCTCCCGGTAATTTTAGACA	1374	CCGCACGGTTTCTTGCAAAA	4806
TCACCATATCTAGATAAAAG	5383	CCAAATCAATAGCTGCAAAG	1373	CGGAATCGACGTTCATGCAA	4801
TCGGCCCTTATCGCGAGACA	5375	CGTAATTGCCCCCATATACA	1373	CCACTTAACTTCCATTAGCA	4795
CTATCAGGACCTGCAAGGCA	5364	CCTCACTACAATGTTTGACG	1366	GCAGCGCCTCGTAAGCTCCA	4794
AATCAAGTCCAGAAGTTCAG	5363	CCACGTACATATTCATGAAA	1366	TCGGGGATATCGTTTCTGGA	4794
CCTGTATAAAGTCCGATCAA	5353	GTGGTTCGACGTTTGCGAAA	1366	TCTGCCGCCGCTCTTCAACA	4790
ACGGGAGCTTAGTCACTCCG	5342	CATGCTATTCACCCGTTAGG	1359	CCGTCGGGCTTCCATATACG	4788
AAAACCTTTGAGACGTTCGA	5339	GCAATTCGACATCAAAGGAG	1355	GCTGCAAACGTCCTGTTCAA	4786
AAAGGGATCGTGCTGCTCAA	5333	CGGCCGTCTACTGCAAACCG	1354	GATCGGTCAGCATAACAGGA	4777
TAGATCAAACCAGCAATGAG	5332	CTTTACTCAGGATTAAAACG	1354	CAAATTGGAACGCCTCCAGG	4769
CCTGATCATCGCCATTGAAA	5331	GCGCGCTCCCAATAGCAACA	1353	GAACGCCCACGGCTACGCAG	4768
CTATCTCTCCGTAATAACCA	5326	GCGGTATCAGACAATAACAG	1348	CTACATCCCATTGAATAACG	4768
AATAAATGTCTTGAGAACCA	5326	CTAGCCTCCTCGAAGCAAGG	1344	CCACGGGTAGACACACTAGA	4768
CTGATAGAACACCCAACCCG	5322	AGAAACCATTTAATTCCCCA	1341	CCGATCTTATACGTGACCAG	4763
AGTACTAAAGATATTTCAAG	5311	CGGCGGCCTTTGCTATCGAA	1341	ATGGCCTACCAACAACAGCG	4761
CAACCAATTTGAAAGATCCA	5310	TAGAAGGCCAGTCTGCAGCA	1340	TCTCATGACCTGTTGACGCA	4757
CCAGCCCGAATATCGCCCCA	5302	TATGGGCCTACCCTGCTGGG	1340	CCAGGGATACCAATGCCCAG	4754
GCAATTATCACCCCTACCGA	5297	TCGGTTGTAGTGATTCTAAA	1339	ACAGTAGGCATAACAAACCA	4752
CGTCCGCGATAGATAACGAG	5293	TAGGGGCTTTAGCCGATCGA	1336	AGGTCTCGTTAGGCGATACA	4749
CAGAGCGGCTCATCGCCCAG	5289	TATGCGTGATCTTATCTGGG	1336	GCACTCCTCCGTTATATCAA	4747
CGTCAGGCCACAGTATTCCA	5287	CCTCAGGTCGTTCTTCACCA	1335	CATCGCCGTGACTATTGCCA	4743
AAGGATAAAGCAGTTAACAA	5283	CATTATTTTCTGAATACAAA	1331	CAGGTACTCCCTCTTCCAAG	4742
CTAAGGTCACGCCCTCCGGA	5273	CGTGTAGAATATCCGACGCA	1330	CCTCACCCCAGCGCAATCCG	4742
CTAGAGAACCCTTTTCAAGG	5269	TAGGAGGCTGGTCCACAAAA	1327	CCGGCTCCCATCACTTTGGG	4741
CTACAATTTCACCCTACGCG	5264	CGTCGAACTGACCCTATACG	1327	CATGGCCCCGCTTATACCGG	4739
CTGCGGTCTCCCCAACTGGA	5259	CCTACCAGTGCACAGACAAA	1325	ACGAATTGCGGCATGCCAAA	4739
AGGGACGTTGCGGCATTACA	5255	TCGTATAAACGACTGACAGG	1323	CCTATCATACTTGCACAAGA	4738
CTTGACTATCGCCTTCTAAA	5248	CTAATACTTAGGAAGCCGAG	1321	ACACTTGACACCGCACTGAA	4738
GTTATAATCAGACAGTTGAA	5235	GCAAAAGCAGGCAATCCGCA	1315	CCAGACGGCTTAACACCAGG	4737
GCGACCTAAGGAATACGGGG	5222	CGTGATCTTTCGTCTCGGAG	1314	CGTGCCTGTCTTCAATGGCA	4735
CCACTATGATTGAATATACA	5210	CCAGAGGATTTGCCTTTACG	1311	ACTGAGTCCTGGGCGTAGCA	4732
CAGGTGGCTTTCCTGACAGG	5209	AAGCTAATAACGAAACAGAG	1309	TTTTCCTGCATGACTTGGCG	4732
CTAACCGAAAGTGATTCAAA	5203	CCTGTCAGCACATTATAAAG	1307	TTGATACTTAGACTGTAAGA	4729
CAATACCATAGGCCAATCAG	5197	CTAGCTAGACCCCATAAACG	1306	ACTGCCTACGCCAAGCTGGG	4729
CTGACCAATGGCCATTACAG	5194	CAGACGTGTACAGCAATCGA	1299	GCACCTTGCAACACATTGGG	4728
GCATATACCCCTATTTCAAA	5193	CTTGAACCCTGTGCAAACGA	1299	GCTTACCCAGTTCTACCGGG	4727
CAAACTAGAAGACAAACGAG	5190	CTTGGTCACCGGTCGCTGCG	1295	TCGCGTCACGGCACTACGCA	4727
TAGCTACTAAACATTCCGCG	5187	CTATTATATGACCCATCCGG	1289	CGTAACATTCCGCCATCCGA	4725
AGTTCCATAATGGCGTTCCG	5185	CGTTGATGTTTGCCACTCCA	1289	CGACACCGTTGTAAAACAGG	4724
CTAGCAATCGAATTGTGCCA	5174	TCAATAGATTTCACAAGCAA	1286	TCACCGCTTAGTGTGCGCCA	4723
CTAGAGCTCCCGCCAAGCAA	5173	CTGGTCCGTCCACTGCTCAG	1281	ACATGTAAATGCCTGTAGGA	4723
CTTTTTTGAGAGAAATCCGG	5170	GCATCTGCCCCCTCGCTGCA	1276	CAGGTATTAGAACTATACAA	4722
CAGCGATACTTGTAAACAGG	5161	TTACTTAGACATTTGAAGAA	1276	TGGCTAAACCTTCAAACCAA	4721
CGGATCAGCTTACTAAGGAG	5153	CTTCTGAATGACCATTCGCA	1275	CTGGGGCTATCCCTGCGCGA	4719
ACAGGGGACGGCAAGTTACA	5150	CCTGAGTGCTAATAAACACA	1270	GGTCTTCGCTGCTCATCACA	4718
CGTAAATAACTCCTGTTAGA	5142	TATGGTCGAGACTTACCCGA	1269	TGGATAAACTCGGATCAAGA	4716
CCTGCCCCTAACGTAACGGA	5124	CGTCGACCCCAACTACGACA	1268	GCTTAGCGTAACGCGAAGGA	4716
CCTGAGAATTACGTACGAAA	5124	CTACTCCTTGTTGAAACAAA	1261	CCACTGGTTTCACCGCGCGA	4715
CTACTAATCAAGAATCACCG	5120	TAACGCACTAACTCACACCA	1259	CATCTGACTGACCCATCAAA	4714
GGATGTCTCCGAATTTCAAG	5119	ACATCGTCTCGGTTGTAACG	1259	TGTACAAATCTATTGCTCAA	4713
ACACATCCTTTCGTATGGGA	5116	CTAGTATCTTTTATGTTCAG	1255	CCTACCCCACCGAAATCCCA	4701
CAATTACCACGCGATTCCGA	5114	CGGGGCCCCCACCATTCAAA	1255	GCAATCCCTAAGTATCCGAG	4700
ATATCAACTTTTCCATCGCA	5110	CCAAGCCCCGAGCAACTGGA	1254	CCATGAGACCCCATTCACCG	4700
GCTACGGATTTCCAATAAAG	5109	CCACCGCTCACCTATACGCG	1254	GCGGGCTTCGAACAACGCCA	4699
ATACTTGCCACAAAACTCAA	5082	CTAACAGACGTTACATCAAA	1253	GCGGACGGATCTCAGCAGCG	4699
CTGTACCTAAAGTCTTTAAA	5079	CTGAACTCCTAACCAACAGG	1250	AGGCGGCATAGTTAATCACG	4698
AGTAAAGCTTCGAAATCCGG	5075	AATACGCACCAAGCTAACAG	1250	CTGATAAACCTGGATTACGG	4697
CTAGTGTGATGTCCTATGCA	5073	TATAGATTCCATTAGTAAGA	1248	CCTGGTTTCACGCTACTACA	4696
CCGTGTCGTAAATAAAGCGG	5072	CAACAGCTCCGCGATTCCCG	1244	ACGGTCGATGCCCCATTAAG	4695
GTTGCCTAATGTAAAACCCG	5067	CTTCTTGAATGGATAATGGG	1244	TTAAGGGCCTGCACTACCAA	4694
CGGGTTGCACCGGTTCCCAG	5062	CGGTGGCCTCCGACTAGAAG	1243	ACGATCCCCTGCCTATACAA	4693
CTGACGGGACGGCTTCTCCG	5060	CATTGAAATCTGTAGTGACA	1238	CATACCTTAGGACCTCTAAG	4691
CGTCAACCATCCCAGATAAG	5055	CCTTGCATCAGAAAAAAGGG	1237	TCTGAAGTAACGATGTCGGA	4690
GGTAGGCTACAGCTTTAGCG	5033	TCTATGTGCTAAGCGTCGAA	1236	CCTGAGACTTCGAAATCGAG	4690
GCGCGACGTAATCTGCCCAG	5029	CTGGACCACATTGCAAGAGA	1236	CCGCGGAGTGCATTATTGCG	4690
CCATCCCACCGAGATAAAAG	5028	CAATCTATTTCACCAATACG	1232	CCGGATCCACGACTGCGCAG	4688
CCAGGGATACCAATGCCCAG	5027	CGGAAGCAAACTATGTGGAA	1222	GCAGACCTACGCCAAACACG	4687
TATGTGGGCCGCACAACCCG	5026	CTAGAGGCAGACGTTCCAAA	1222	TAATTATTTCGGCTTCCGCA	4687
CTTAGCAAACATTTGTACAA	5016	ACTTAGTCTTTCCTGTACGA	1219	TAACAGGTCGGCGAATTCCA	4684
CGTAGTAACGAGTCATCAGG	5005	TTAAAAGGTCGTGCATTGAA	1218	CTTGCGAATAGACTTTGCAA	4682
ACTGAACGTATTTCACAGGG	5000	CGAGCATCTCAGTCGATAAA	1216	CGACCTGCCCCTCTAATCGA	4681
CTAATCCTTGTGTCACAACA	4977	CTTCTCATACGCCTTTGCAG	1216	CTTGTCTCTGGCCTGTACGA	4681
CCAGCTAATACACATACAGG	4971	TCACATGGCCCTATACTGAA	1216	AAAGTTACCTTGGAACTGCG	4680
GATGGGAGTACGAATATACA	4963	TATTGCCGATTTATTACAGG	1214	CTTAAGGTCACCCTGTAAAA	4679
CTTCCGCCCTCGGCTTGGCA	4953	AAACACCCCAGTAAATAAGA	1210	CCTAACCGCAACCCAACAGG	4678
ACAATCAGCCATATAAACGA	4949	CTGTTGCACGAGGAGTACAA	1207	GGTGGCTTACCTCCTTGCGA	4678
TGATGCCAAGTCCTTTGCAA	4934	TCACACCCCAGGCAATTAGA	1203	ACATCCCAACAGGCGACGCG	4675
CTACTGGGTAGAACAAAAAA	4934	CGATTGGGCTTGCTTCAGCG	1199	TATAGATAAATCCCACTGCA	4675
CAAGGGGCCTAGACTACAAG	4932	CCTTCCAAAGGCTCACCAGG	1191	CAGAAGGTATCGCCAACAGG	4675
ACGCAGAATAAAACGCAAGG	4928	GATCGATGCCTAACAATCGA	1180	CCACGTCCCTGCGCGTGAGA	4674
ATTCCACTCATAACTCGCAG	4909	CTTACCAGAAATACATTACG	1178	CAGATGCCCGATTTAACCAA	4673
CATTTCACTGTCAAGCCACA	4893	CCAGGCCCCCGGTATACACG	1174	CCACCTAGACTACCTCTGCA	4673
ACTTTATATTGTTAATCCGG	4881	CCTAGAGCACCCCCTAGCCA	1171	CCGATTTGATGGAATACAGG	4672
CTGGCTCGAGTATTGTAAAG	4875	ACTTCCGGCACCCATTTGAG	1169	ACGCTGGGTGGCCTGCGAAA	4672
CGTTAGCGACGATAACTCGG	4868	CGTATCCTTAATCCTTGCGA	1168	GCACAGTTTACCCCGTCGGA	4669
CCAACCCATCGATATATCCA	4849	CAAGTGAAAGAACATTTCGA	1168	CTTAAGCTTCGCCAGAGCGA	4667
CCAGATTTATGACCTCGGAG	4833	TAGCCATGTTAGCCTCCAGA	1166	TGATGCCAAGTCCTTTGCAA	4667
ATATGAACTACGATTTCGAG	4830	CTATTACACCAGTTGCGCGA	1163	CGTCGACCTAGCCATACAAA	4665
ACTCGAACTCTGGAATACAG	4826	CTAACCCTTCCCAATCAGAG	1160	CGTTATTTACTGTTACCCCA	4665
ACAGAAGCAGGCGCATTCAG	4820	CATCGGCATTACGTAATCCG	1159	CTGCCTTATCTCCCACCGAG	4664
CGATGGGCCCGGTTTTGAGG	4807	CATACAATCACGGAGATGAA	1157	TATTATGCTTAAAAGCAGGG	4664
CTAAAAAACCTGCAACTAAA	4806	CTGTAATGTTTATTACGCCA	1154	CTGCCTGATACATCGATCCA	4664
GCAGGTGCCATGCCTAAACA	4805	GCTGGGCGATCAGTGATCCG	1152	CAAATCCTCAACTATCGGCG	4658
CAACCGTACTCTACTCTCAG	4802	CTTCACTGCCCTACAAGGCA	1151	ACGAGGTATAACCCGTGAAA	4657
CCTAAGAATGACACTCAACG	4795	CATCATCCCGAGGCTTTCGG	1150	GCACCGACCCTTAAGTTGCA	4656
TCAGGGCTCGATTTGTCAAA	4789	CCTCTCGCCAGCCATCTCAA	1150	CTATTGTCAACGCATCCGCA	4656
CCGATATATAATCAATAAAA	4778	CGGAAACATGTATAGTCACA	1148	GCTGGGGTATGACTGCACAG	4654
GTGCACCCTGTACAAAACCA	4774	CATTACTTAAGACTGAACAA	1147	CTGTAAAGCCTCGCGACAGG	4653
GCTTTAAGAACGTTGTCCCA	4769	ACAGAAGCAGGCGCATTCAG	1146	CTGACTCCAAACCTACAGGG	4653
ACAGTTGTCAGCTAATCGGA	4768	AATTAATCCTGGAAACTCCA	1143	TAGGTCCCACCAGAGTTGCG	4651
CGATAATGACCTCCACAGAG	4766	TGAAAAGACCATCTACAGAG	1142	ATTCGGCTACTTGCTCAAGG	4649
CCGTAGGACGACCCTTTGCA	4764	CAAGAGGTCGCTTTTTTCGA	1140	CCGTACCTCATCTAACACCA	4648
ACAACCTGACCTGAAAGCGG	4762	GCACCCATAGGCAAGTCACA	1139	GGGCTATGCAGACTAACCGA	4647
CAATTGGACCGCTATACCGA	4759	TCTTCTGTACGTGAATGCAA	1136	CTAGCAGGACTGTAGCAAAA	4646
CCGACGTATAGAACTCGCAA	4754	CTAAGGAGACGCTCATGCAA	1136	CCAAGAAACCGCCCAACCGG	4646
CTAACAGACGTTACATCAAA	4751	TCGGCACTAACACCGTTACG	1134	CAATGTTAAAACAAATACGG	4645
AAACTGGGATCCTAGACCAA	4750	TGTGCAGGACCAGAGCCCCA	1131	CCGCGCACCGTTAAGTACAA	4644
CTTTTCTACTATCTTAGGAG	4750	CTAGGTGATTCCGTTATGCG	1130	GATACTGTAAACTAGAGAAG	4642
CCTTCCATTCCGTCATAGGA	4737	CTTGTGACAACTCCTTTCAG	1127	CGTAGCTCAATCACTCCGAA	4640
AAGCATATTACTTTGAGCCG	4735	CTTGCCACTTGTAAAATCCA	1124	AGGGCGGGAAGAGCACTCCA	4640
ACTGTAAACGATATACCGGG	4728	CATAACACCAAGAAATTAAG	1120	CGGCGCATAAACGCTTTAAG	4637
CCGGGGCCCCGCATACACAG	4727	GCTACCGGATAAGAGTCCAG	1118	TGTTATATACACCCTAGGAA	4637
GCATCTGTTAATCATACCCG	4723	CCTGTCATAAATTCGTCAGA	1116	CCACTGATCAACCCTTCAAA	4637
CGTCTATCCCCGGCTAAACA	4720	TGTGGGATTACTGAAATAAA	1116	CCTGTCACTTGGCCATCACA	4635
GAGGGGAACCCCGTGCACAA	4720	TAATTTTCCTGCTTACTCAG	1115	TTATGACGACCGCTATCACA	4634
TCTACCTGTGGTATGCTAAG	4708	TATTCAAATATACTTCCGCA	1114	CGTCGAGGCGTCTCTTACCA	4634
CGTATCGCCATCTAGTACCG	4702	CCAAACTTACGACAGAAAAG	1114	CCAGGATAATGTATGAGCAG	4633
CATTGACCCTTACTGTTCAA	4697	GTACATCTCCGGTCGAAACG	1111	CCGTACGGAATCACTCAAAG	4632
TTTTGTCACGAGGTACTCAG	4694	CTTAGGCCTATGTAAAGGCG	1111	CCGAGCCGATCGCTGCCAGG	4630
CCGAGAACTCTCACTAGCCG	4689	CATTCTATACGCGTGTTCAG	1108	ACGTTATACAAGTTGCTCAG	4630
CCAGAGGATTTGCCTTTACG	4687	TAGCCTTTTAGGGCTAGACA	1108	CAGCGAGTCAGTCATTACGA	4629
CAGACATGCGCGTTGACAAA	4679	CGACTCCGCAAGACTTGAGA	1107	CTTCCGCCCTCGGCTTGGCA	4628
GCGGGTTATAGATTAACCAG	4677	TAACAAGGAACGCTTCCGGG	1107	ACTTGCGAAGTACATTACCG	4628
TCACTGGCTGTACAATGGAA	4664	CCTGCTCTCCGTATTCGAGG	1105	CGACGTGAAAAGTATACACG	4627
ACACGGGATACTAAATCGCA	4662	CGTACTGATCTTACAAGGGA	1104	CTGGCACCCAAACCGCGAGA	4627
TGTGCAGGACCAGAGCCCCA	4653	AATCGTAACCCCATTAGAAA	1103	CATACACTCGTATAACACCG	4626
CCATCTATCACAAATTACCA	4649	CGAAATATATCATAACCCAG	1102	CTGGTCTCATCAGATTTCCG	4626
TTTCCATCTGCGTCACAGGA	4642	GCAGGCTCAGTACAGTCGCA	1099	CAAAGTCCCACTCTTTACCG	4626
CTTAAATATTCGCTGCGGAA	4642	TTACATCGCAACCATATCAG	1098	CTGTCCACCGCGTAGCCCGG	4623
CCTTGTGTCAATATAAGACG	4638	AGTCCTGATCCGCTAACCCA	1097	CATCGCCATACCCTGATCCG	4622
CGTCACTCCACGCCACAACG	4631	CAGGGAAACTGCGCGTGACA	1094	CGGAAATTTTGGCAGTGCCG	4622
CTACATACACGACTTTCCAG	4630	CCGGGAGCATTTGCATTCCG	1094	CGATTCAACACCGATATAAA	4621
ATAGTCTAACCGACTCCGGA	4615	CTAATTGCTGTAATTCTCAG	1092	AAAGACAGATGTGTACGCCG	4621
TGGAGATGAGAGACTCGCAA	4612	CAGCGATACTTGTAAACAGG	1089	CCGCCCGTTTTCGAGCCACA	4621
CTTAATAAATTGCTTACAGA	4590	GCGCGACGTAATCTGCCCAG	1088	CAAGGGTGACCGCATCGGGA	4620
CATGCATGACCAATAACAAG	4579	CCGAGCTCTCCAACATACCA	1088	CGTCGAGTTAGGACGACGAA	4620
ACACTCGGCAGGTATATGAA	4578	TATTGTCTAACGTATCGGGA	1086	TCGGTGCCCATCATGAAGCG	4619
TTGTGCTAAGCGAATAGAGA	4573	ACGGGCACACGCAAAACGGA	1086	CCATCCCTCTAAACTATAAA	4618
GGATTCGTCTTCTCGCGCCA	4560	CGGGTCCATATTCCAACGGG	1085	CGATACTTCATATTGAAAAG	4617
ACTAGCCTAGAGAATCACCG	4548	CTGTGTGAATTAATATCAGG	1084	TAAACGGTCTCTTATTAGAA	4616
GTGGTTCGACGTTTGCGAAA	4547	CCATGAGCAGTGTTAAAACA	1083	CATGATCCAACATCTCGAAA	4616
CCGAGCCGATCGCTGCCAGG	4530	GCGCGTTCTTCCTAAAGAAA	1080	TCAGGGAGTCACCCGCTGGA	4616
AAGAACCTAGTAACTAGCAA	4529	CCGAGTCGATCGCATTGACA	1079	TCGGTCAGCCCCACTCCGAA	4615
TTTGCAGCAACCCCGCGACA	4524	CAGCCACACCACTAGACACA	1079	GTTAAATCCTTTATTAACAG	4614
CGGCTCTTTCAAAAGCCCAG	4522	CCTCGTAGCCGCGATTCCAG	1076	GGGGATAACACTTCACACAA	4614
GCGTCATTAAGTCAATCAAG	4514	AAACTCTTTATGAATTAGGA	1075	CGGTCTCACCCCCTGCAAAA	4613
CCAATACTTTCGGTTACGGA	4510	CGTGGTCTACTGTCATACCG	1071	CAGGGCCCACGTCCGAGCCG	4613
CTAGCTCCATCCTAACCGAA	4503	CGTCCGTGTTACATACCGAA	1070	ATAGACATACTTGATTGAGA	4612
AGGACGCACCAAGTTACAAA	4463	CGGCGATCAAGTAAGTGAGG	1069	AGAGGTCTCCGGGCTTAGGA	4612
CTACCCTCCCACAAGAAAGA	4439	GCAATTCGAGCGCAGCAAGG	1069	ACGATCACAACGGCGATACG	4611
ATACGTAGACCCCCACGCAG	4434	TCGGTCACTACACTATTCCA	1068	CTGTTCGTATTGGAAATCGA	4610
TGATTGACACCTTAGTAAAG	4433	CAGGCCTGTCAGGTACAACA	1066	TATCGCTTACTCTTGTAGCA	4610
CGTCGTCGTATACTACGGAA	4427	CTGTTAGCCGGGACACGCGA	1066	TCAGTTCACGACCCGCTACA	4610
CATGTTTATTCTACGATAGA	4425	TCTAGAGCCTGAACACACGG	1066	CTGCTACCCTACACACTCAG	4609
ATGGTCCTTATTCATACAAG	4422	CTTCTCCTAATTAAGACACG	1065	CGTCGGCTTAGCGTTCGAAG	4608
CCTCCGAGAATAGATTTCAG	4409	ATTTGGGCTATATTGCACAG	1064	ATGCAATGCTATCAACAGAG	4607
ACTTATGCCCTAATATCAAG	4408	CATTGTCTCTGGTTGCCACG	1064	AAACTGCACAGCCAACGCCG	4607
GGTTCACCTTTCATGATAGG	4403	TCAAGCGATGCCAATATACA	1064	CGTCCGTGTTGCGTGCAAGA	4606
GGACTCTAATCCATTCGCGA	4402	TATGCGACCCCAATACCGCA	1063	ACTCGCCCTGAAGCATCACA	4605
CCACATACACATCAGTTCGA	4390	ACAAACAATCGGACGCAGCG	1062	CAATCCACCCGTTCGCGGAA	4604
CGGGGCCCCCACCATTCAAA	4376	CATAGTGAACTCGTTCACAA	1062	AGGACGTCTTCCGCAATACA	4602
CTGACATCTACAAATCTCGG	4373	GGATATATAGGTGAACAACA	1061	CCAACATGCTCGACACACGA	4602
CCAATCGGAAGATAAATCCA	4370	CCTCCCCTAAAGCATAACAA	1061	TGGCGATAACCACCTTCCAA	4599
CCATAGGCCACGATAAGAAA	4370	CCACCTAGCTACGTGTCACA	1060	CATGCAAGTGACCAGACGGG	4598
CTTCTTTACCCTATACGGGA	4361	TAACGGGGACGCCTACAGCG	1060	CTAGGCCAAGTCACTAAAAA	4598
ACGATAGCAGCAGTGCCGAG	4360	CCGCCCATCTAAGTACGGCA	1060	CGTGCGTTAGTTAATCACCG	4597
GAACCTTGTAGGGCTATGGG	4359	TTGTAGAACATTGTATACAG	1058	CCGTGCAATAGACCTATCGG	4596
GGGGTACATGGTACTCGGAA	4354	CATAGCAGAGATTATTCCAA	1057	ACACATAACCGATTGTACAA	4596
CTAGGCCTTTCCCAGACCAG	4351	CCACACTAATACCAATTCCA	1057	CGTCATATCCGCGCGAACAG	4595
CAGCGATATTGCGTGTGCCA	4350	AAACAGGTACCCTAGCAGAA	1056	AATCATGGTGGGTTGAGCCA	4595
GGAACATCTATTCTACTCCA	4349	ACGACGACCACCAAATCCCA	1055	TCGCTGGTATCTTTGCTAAG	4594
CATACAAGTTGGGAAATAGG	4344	AGAGGGCCATATGTATACGA	1055	ACGCTTGAACTCGAACGAAG	4593
CGGATCTGTGCGGTGCGCGG	4334	CCATATAGTATAAAGCAACA	1054	CCGTAACCATACTTGCTCGG	4591
ACGGAAAACTCCGCTTTAGG	4330	CTATCCTGACCTCAAACAAA	1052	CCGGTTGCCTCCCCTATAAG	4591
CCAGATCCTCATAAAATACA	4327	CGGGCCATACGTACTCAACA	1051	CCTGTGATTACTGAACCCGA	4591
CTGACCTAAGCACTGTGCAG	4323	CCAGATTGAAACGAGCTACA	1051	CAGGCGTCCCAGTATCACAA	4591
CTTCAGTTTGACGAAATGAG	4319	CTACATAGTACGCAATCCGA	1051	GCTGGTCACATACATATCCA	4590
CGACTCCGCAAGACTTGAGA	4318	CTGCTCATTGAACAACTGCG	1049	CCGCCTTTCAGTCATTCACA	4588
TTGACCGTATCTTTTCACAA	4316	TTACAGATACCGATACTCAG	1049	CCGGGCACAGACTCTTGAGG	4588
CCATATAGTATAAAGCAACA	4315	CTAGACATTACGTCGACCCG	1048	CGACGTAACGGGATGACGCA	4587
ATGCGATAATACCCTAAGGA	4315	CAGCCAATTACGCCATTAAG	1046	TCGCCGTTTAAACAGTTAAA	4587
CTTCACGTCCATCAAACCAG	4315	CAAACGCAACATTATCACAA	1046	ATAGTTACCAGAGCAAAAAG	4586
CCGACCCTTTTTCCAAGGGA	4312	CGGCTAGGAGCACTATACGA	1046	TTGGAGGAAGACCAGTTGAG	4586
ACTTCGCATACGTATCCACG	4297	CAACTCAAACCAACACGACA	1045	CAAGTGAACGTGCCGTTCCA	4585
CATACAAATAAATTATAAAA	4273	TAGCCTGGTCTGCAGCGCCG	1045	ATAGCGCGCGTGTCAAGACA	4584
TGTTCCTTCCATCTACCGAA	4270	CCTAAGGACAATCCATCGGG	1044	ACAGGCCGCGGCCAAAGCAG	4584
GAAAGTCATGACAATAACAA	4254	TCAGTCAGTACCATATGACA	1044	CTGATTGATTAACTTCAAAA	4583
CAGTTTCACTTTTCTCCCAA	4254	AGTGGCAACTACTCTCACCA	1044	TAGGTCCGTGCGGATCTCCA	4583
CCATTGATACCGGTGAAAGG	4247	GGGTCGGTCTGTTTATTGCA	1043	GGTCGGGTCAGAAAACTAAA	4583
CATAACACCAAGAAATTAAG	4236	CAAGGCCCAGACATTATCGG	1043	TCTGATGAATGCTAATTGCA	4582
CTTGGTCTTACCCCGTCACA	4234	ACTACCATACCCCCACTCGA	1043	GCAATGTCCGACCTAACCCA	4580
CCTGCCGTCATTATTCACCA	4226	CGACTGGGTACATCAAACCG	1043	CCACGATTCTGGGCTAGGAA	4580
CTAGGAGATATAATGATAAA	4208	CCAAGCACTCCGGAGTGGAG	1043	TAGGGATAAGACCAGCGAAG	4580
CTGATGATTACCCCGAGGAA	4208	CCTTAATACGCTCCGTAACA	1042	ATAGGCACACGCGTGACCGG	4579
GATGAAGACCCGTCTTGACA	4207	TGGCGACGTCTACTGTGCCA	1042	CGGGACTTACAGGATTCAGG	4578
ACTCTATCAGGAACTTTAGA	4201	CAGGATTATCGACTGTACAG	1042	CCGTCGAAATTTACTCAACG	4578
CGATGGACCCATGCGTCCAG	4198	GTACACCACGACCCTTCCAG	1042	CTAACCGTTGCAAAGCCCCG	4578
CTGCTACATGGCTTGATAAG	4192	ATGAACGCCGCAGCTAGCCA	1041	CCTTAGGCAGGGCTTCTGGA	4577
CGGGCATTCTCCCTGCCACA	4192	CAGTGACATGCAATGATACA	1041	TTAGTTGTTGTCGATAGGCA	4576
TTTCCTATCCCCTCTCTCAG	4190	AAGCATATTACTTTGAGCCG	1040	CCACACCCCTAAGCAACGGG	4576
CTTGACCGACTGTATATAAA	4172	CTAGGCCTTTCCCAGACCAG	1039	CGTGAGCCACGTAAGCGGAG	4576
GCATGCCTATGGCCAAACAG	4172	CTAGTGCGCCGCTAATCCAA	1038	AGGCCAGTACCGACGAAACA	4576
CGTGTAGAATATCCGACGCA	4160	AGGACGCACCAAGTTACAAA	1037	ATAGTATCACGTCCATTCAG	4575
TCGGTTGTAGTGATTCTAAA	4149	TAATGACCAACACAGAGCCG	1036	AGATCCGCTGCAGTGCCAGA	4575
CATCCATCACTCCCGACGCA	4148	GCTTGCCCTAGTGCTCGACG	1036	GCAGTTCGCAGGACTTGCGG	4573
CGAGCGATCCACATAATCAA	4147	CCGACTCCACGACTGCCACA	1036	CCGCAAGACTTTGTTACCAG	4572
AGGAGGTTCTATGATCACCA	4145	CCAACGGTCCGGGAACCGCG	1035	GTGATGCCACACTCAACGCG	4572
GTTGGGGAATAACAGCCGGG	4144	CAACACCCATTTGTGCGGAA	1035	TAGACTTAATTGTAGCTGCA	4572
ACGGCCCCACCTGTACCACG	4140	ACAGGGGACGGCAAGTTACA	1035	CTTTCTTCACCCTCAAACCA	4571
CGTTTCCTCTATCATTTCAA	4137	TCTACACAACCGATATTACG	1034	GCGCGACGTAATCTGCCCAG	4570
GCTCTAAATGTCGTACTGCA	4132	TGTGGCAGATCACCTCTACG	1034	CGAGCTCGTCACGCACACCA	4569
GCTTGCCACTTCACAAAACG	4131	CGTATTCCCAGGAATAGGGA	1034	CAACAATTCGTTTCACGCAG	4568
CTACTACTACACTCTAGAAA	4129	CTAGCTCCACATTTACTCAA	1034	GCGTCCGATACGCTATCAAG	4568
TCGGCTTCTCATACAATAAA	4125	CCACGCTGTTCTTAATGGCG	1034	AGAGAACCAGAACATTCGCA	4567
AATTAATCCTGGAAACTCCA	4119	CATGTCGCCACGTTGCACCA	1033	CCATGGGTCCCAACTAAAAG	4567
ACAGGGATAACATATAGGAG	4114	CCAGTTCATGAGCTGAACAA	1033	CGTTCCCCTTAAGATTACAA	4567
AGACTACCCTGAAATTCACA	4112	ACAATCAGCCATATAAACGA	1032	CTGCCCGGCGGCCAGATCAG	4565
CCTCGGATACTTCAACACCA	4106	TTTGTACCAGGCGCATAGCA	1032	CCGTGGCAATACCAGAAAAG	4564
TAGCACAAACAAGCAAGGAG	4100	CTTACTATCTCACATAACGG	1032	ACTCTAACCTTCGAGTAAAA	4564
CAGTGATAAGCACCATTGCG	4081	ACTCGGGTATGCGAGCAGCG	1032	CCTTGGGTCTTACTACTCGA	4564
TTGTAATTCTGCGCATACCA	4077	CCTTTCTATGGTACATTGCA	1032	TAAAGAGATTAAACAACCAA	4563
CTTCCCGTTCGCTATTACAG	4076	CATAAGATATGTACAACGAG	1031	CCGACCTCTTATGAATTCAG	4563
CCGCACGAACCAGATTAGAG	4071	CTATCCAGTATCTAGCAGCG	1031	TTTGTACATTGCCTTTGCCA	4562
CATAATTCCTTCTTGCTGGG	4061	CTTACTCCAGGTATTCGCGG	1031	CCGGCTTACACAATACCCGA	4561
CATGACAGTTCAGCAATCCG	4061	CAGGGGGTTGCGTCACAACG	1030	CAGTTCGCAACAAAGCTCCA	4561
CGAGGAGTATCTCTGAAGCA	4055	TTTGGCGACAGCCTTCCCCG	1029	CCTACCCTATATGCGCAGGG	4561
CCGGCTTTAACTGAGATGGG	4049	CGAACACATTATCTTATGAA	1029	CAATTCTCCAGCGCGCGGGA	4561
GGACTAGGAATCGTATGCCG	4043	GAACGACCCGTCTTGACAGA	1029	AATCACACACCACAATTAAA	4559
CAAAAACCCTTTAATAAACA	4039	ATGATCGTAACATAGCTCAA	1029	CATCCGTCATCGACTACCAG	4559
CAGGATAGCTGTTATACAAG	4037	CCATACCGCCACATGCGGAA	1029	CTTCTTGGTACAACATCACG	4559
CAGCGGTGATGATTAATGAA	4036	CGACATGCAGAACTGTTACA	1029	CGTGTCGGTTGTGCTACCGA	4558
CCGGGGAGTAGTCTACTACA	4035	TAACGGTCACCCATATGGAG	1028	ACGTTGACCCAGGAGTCACG	4558
TTGATACTTAGACTGTAAGA	4033	CAGCCGTACGGCCCACACGG	1028	TGGCGTGTCCTCTCTTGCAA	4558
AGAAATTTTCAAGTTTCCCA	4031	CAACTGCCACTAACTTGCAA	1028	CATTCCAATGGCATAATCGG	4556
CCATTTTTTCCCCCGATAGA	4025	TCATTGATCAGAATACAGGA	1028	CGAACATCATCCTCGTCCGG	4556
TCTAGCACCCAAGCTACCCA	4024	CATCTCCGCCGACATATGGG	1027	AGGACCAACTCGTATACGGG	4555
GCAAAACTCGGTATGTCGCA	4023	TAACTGTAAGCCACGCGCCA	1027	AGTGGGTTCATGTTGTCACG	4554
CCTTAGTCAACCCAGAGAAG	4018	TTGAGCAGCAATACTTTGAG	1027	TTTCCATCTGCGTCACAGGA	4554
CAGCAGGCCCCCTAACCAAA	4011	CGATACGCCTATGAGCTAAG	1027	GCTGCAAACAGGCTGCCCCG	4552
CCTCGTAGCCGCGATTCCAG	4009	TAACACCCAGGTCTAACCCA	1027	TAACTCATCCAGCATCCCGA	4550
TGAGTCTGACAAGCTTAAAG	4006	GTGATCCCCGATGAGCTAAG	1026	CGGCCGGCAAAGTTTTTAGG	4548
CCGGCGACACAACCGATACA	4003	CGAGTTACACGACCACAGGA	1025	AGGACAGCTTAACAACTGAA	4547
CTTACGGCCTTCTCTAGGGG	4003	GTGCCTGCCCGCACTTGGAA	1025	CAGCTAGACTAATCAACCAG	4547
TCACTAATAACCAAATGGCA	3987	CAACGCCACTAGGAGCGCAA	1025	AGACGTAATTTGCATAGAAA	4547
ATTTGGGCCGTAAAATCGCG	3979	CGTGCATTATAACCTCCCAG	1025	AGGGTCCACTCCGTAAAGAA	4547
CGACTTTTTCTGTAATAAAG	3979	TATTACTCATGCCATATCAA	1025	TCAACGGTAACTCCAATCCA	4546
CTGCCGGCCGTCAAACGGGG	3975	CCGACACACCTTAAGTCAGA	1024	CATCGTACATTAGCGACCCG	4546
TCGCTCCTCGCTAATCCCCG	3959	TATATGCATATTTAGCTAAG	1024	CAGCACCCTACTGATAGGGA	4545
TAGGTCCGTGCGGATCTCCA	3956	TATTAGCCATCAACGATCCG	1023	CTGAACCCTTCCAAGCGCAA	4545
TCAAGTAAAGGTGTGCACAG	3949	CGGCGTATCAGCGCACTACA	1023	CAGACCAGATTTACTCTGGG	4545
CCAACCCCTACCCAATGACA	3945	AATAGTCACGGGTCATAGCG	1023	GCATCCAACCAACAACTAGG	4545
CGATCCGTTACGGCTCTGAA	3939	TCATCGCACGACCTATGCAG	1023	CAGCCCTTAGTTCATCAAGG	4545
CAATGGCATCCCGCGTGGAA	3936	TCAATAGTTCACGTTACCCG	1022	CTATTCCGCTATAATTGGCG	4544
CAATAACATGTGTTACCAAA	3932	CCAATGCCAAAGTCAAACCG	1021	GCGTTGCAAGTTGATTTACG	4543
CGGTGCCATTTCGAAAGACA	3929	GTGCGCATTACATTAACCCA	1021	CCTGGCTTTCCAACGCAACG	4543
TTGACTACATGGTTACCCGA	3909	TCACTGCATTCAACGTGCCA	1021	AATTGATGCCCGCAGTCCCA	4543
GATGTTAGAACCTTGAGAGA	3907	GCAGGTGAATACCCGTGCAA	1021	ACGGCAGATGTACATACCAG	4543
TAATCCCGACGTCATAAAAG	3906	ACGTACGTAGAGGATATAGA	1020	ACGCTATGCCCAGAATCGGA	4542
TTGTCCATACCTAAGAAACA	3904	TGGGCAGCAGAGGTTCTCAA	1020	TCATGACCTTACCTTTAGCA	4541
GTACCATACTTAATGTGACA	3903	CAGCATATTGGAGCAATACA	1020	CAATGTTTTGTCACACCAGG	4541
GGACTAATCGCGAATAGACG	3899	CAGCCGTGCCCCAATATACA	1020	TATCACCTATAGACGCCAAA	4540
CAGTAATGCCTTACTCTCAA	3898	TTAACCTGTGTGTAGCCGAG	1019	ATACTGCCTGTAGTGCCGAA	4540
CCTCCGTTCACAGATACCCG	3897	CGGAACCCATACTATCGCCA	1019	ACGTTGTGCCAGAAGAAAGA	4540
CAAGCCCCATGCTAAATGCG	3892	GCGCGATCTTATCTACAGGA	1018	CTACAGACTTGGGTGCGAAA	4540
CTTATTTCTGAAATTTGAGA	3892	CAGTCAACTGGGACTTGCAA	1018	GCTCCCCCAAAGGCGAAACA	4539
GGAAAATAAAATCTACGGCA	3890	CAGATTACCATGCTTTAGAA	1018	CGACCGATTGTCATAACAGG	4539
GCGCTCAGCATGGATACAAA	3861	CTGCTCTCTGATTTGTGCCG	1018	CTATATCCCAACAAGTTAAA	4538
CCATGACCCCACCCTCACAG	3848	GTGGTAACCCTAACATCAGA	1018	CATCCTGCATCCGATCCGCA	4537
CCGATACGACTCTTACAACG	3846	GTACCTCCTAACGCGATACG	1017	CCGTAAATAGCCCCTTCGAA	4537
CTAGTTAGCTCGTTTTTAAA	3841	TCTCCGTTACACCAACACGA	1017	TTACACGTTCCCGCTCCCGA	4537
CTGGTCCACACAAAAAACAA	3831	GAAACAGGTCATACATGAAG	1017	AGGATCCCATCATTTTTCAA	4536
CCGCCTAGCAACGATATCCA	3830	ACTACCTATAACCTACAACG	1016	CCTTCGAATTCACAGTAAAA	4536
ACTGAGCCCCGATCACTGCA	3814	CATATGTTACTGACATGAGG	1016	CGTAGACACGACTCACAAGG	4535
CTGCAGGCTTCAAAGCGACA	3813	CCGCCGTCTATTACATTCGA	1016	CTTGTTTTCCATATGCCACA	4535
GAATGTTCCCGAAATCTAAA	3801	CCTCGATGATTACAGCTGCA	1016	AGACTCATTCAACAGCTCCG	4534
CTTCTTAGTCTTACACTCGG	3800	CCTACCATCGCATAGCTGGA	1016	CAGTCTTTTTTGGTACCAAG	4532
TTGTAGAACATTGTATACAG	3797	CCTTGGACTCGATTAAGAAA	1015	CGATGTATAGTATTTACCCG	4532
CTTACCGTTTAATCGCTGCA	3788	TTAACGGACTTAGCACAGAG	1014	CATTTGGATCGTGCGTTAGG	4532
CAATGGCCCTAATCGACGAA	3784	CTTGTTCCTCCTCTATGACG	1014	CCATCAGTCGCGTCAACGAA	4531
CTTGGTCACCGGTCGCTGCG	3783	TGGTACTCCGAGGTTACAGA	1014	AATGACTACGCACTAACAGG	4531
CGTAATGTCCGTTTGAAGGA	3769	CTTCAGGTTCCATAGCGCCG	1014	CAGTAACCCTCGATGCACGA	4530
CCAATCACATCTGATTCCGA	3758	CCTATCACTATCATTCGAGA	1014	CGGGATCTCTGCAAGCCAGA	4528
AAAACACACTGGTAACGCGG	3758	ACGCATTGTGCATCTTTAGA	1014	CTGGATTTACTAGAGTTCAA	4527
CATCTACACTAAGCAAACGA	3753	CAGTATAACCTAGTGAACGG	1014	CAAATACCTGGCCAGCAGCA	4526
CTGCCGGGCAAAGATCTCCA	3748	GCGATTATCGCCACGCTCGG	1013	CAACGTACCCCCTAGATCCA	4526
CAGCAATAACCCAAGTCACA	3735	TCGACAGTAACCATTTGCAA	1013	CAATATGCCCTCCCATCCCG	4525
ACGGGATGTGCCCATTCAGA	3726	CGGGGAGTCGTCGCGACAGG	1013	CAGACCCCACCGACTAGCAG	4525
GTAACGATTTCCACTTGCCA	3724	CCGTGATCATAACAGCACCA	1013	GCACTCATCCCCCCGTTCGA	4525
AGACAACACTGAGCAACAAA	3711	CCGCACAATGCTACGCCGGA	1013	TGGACATAAAGGCAGAAGCA	4525
GTTGTCTCCTGATAACGAAA	3709	GTGCGCCTTAGGCTATACCA	1012	CTAGCCTAAGCCGCATGCCA	4525
AAATCTACCAAGGAAATACA	3704	CCACGCGTCGCACCGAGCAA	1012	CAACTTACACCGAATCGGCG	4525
TCACTACCCGACCCACACGA	3703	CCACTCTGTATACATAGCCA	1012	ATTGTGGCCCTGACTTGGCG	4524
TCGACGGTTCACAAGTTGCA	3702	ACTTACTAACAGTCATTAGG	1012	CTTCATGTAGCTAAAACACG	4524
CTTAAACCCTCCTTAAAGAG	3701	CAGGCCCGCCCCGCATCCAG	1012	TCTTGGTACTTATTTTGGGA	4523
ACTGATACTGTCCCAAGCGA	3699	CTGACCAATGGCCATTACAG	1012	CGACTATTTTTCCAGACCCG	4523
GTGGGCTCACACCTTTCGCG	3695	TATATTGATACCATATAGAG	1011	TAGGGATCCACCACACTAGG	4523
CTTAAAACATGTGCTACGAA	3693	ATTGTGTCCCCCGTATCGCA	1011	CGGTTAGTAGGCGCTCACAG	4523
CCATACCTTTCCCAGATCCA	3684	GCAGACTCAACATTGCCCGG	1011	CATTCTGTCTTTCCGAAGCA	4523
AAGTTCACAACGTTACCACA	3670	CATCCTATCGAATATCCAAA	1010	CATTTATACTTTGTGCACAG	4523
CAAGCAATTCCGACGTACAG	3667	CCAACGCGAAACCAACACCA	1010	GCTGTTCCAAAAACTTCGAA	4522
TCGTGCTTACAACAAAGAAA	3657	CAGGTGCCACGACCAATAGA	1010	CCACCATATTCTCAATTAAG	4522
TAAGTGTAATTGGTATGCAG	3655	CGTCCCCCAGGTATGATGGG	1010	ACGGGCAGCCCGCTTCTCGA	4521
CCTATACCTTAGGCTCAGCA	3654	ACTATCGACCTTCTTATCAA	1010	CAATACTACGTCTTTCCGCG	4521
CGAAAAGGACCTGAATCCAA	3651	AAGCCGTCTCCGCCATTAAG	1009	ACAAGTAACAAGGTTACAGG	4521
CTTTTTTGAATAACATTACG	3649	CTGTAAGTTGAAGTACTGGA	1009	CGTGAAGCCCCTCTTATGCA	4519
CGACAGCAACTTCTTTCAAG	3642	CGGTCATTACTGATGACAAG	1009	CCTCCCCACAATATAACGGA	4519
TAGGAATCATACTATTTGCA	3641	CTGTCTACTCCATTGTTCAG	1009	ACATTGTCTCATTTGAGACG	4518
ACGACAGCTAGTTTTTGCCA	3635	CAGCTCGGATGAATATACGA	1008	CCGGAGAGTCCTCCTACACA	4517
CAGCTCAACCCTTATTTGAA	3632	TAACTCATCCAGCATCCCGA	1008	GTGCGTTCACGCTTGTCGAA	4517
AATATTTGTATCGCGTAGAG	3622	CCTACGACCTTCTAGTCACA	1008	CTTAGATCTTCCAAGCCCGG	4516
GATCGACAATCTCAGTCAGG	3619	GCTCACTGCAGGGTACCACA	1008	CTTGTCAACCAGGTTTAGAG	4516
CTGTGTATACACTATATGGA	3618	TAGCTACCCGCTAAACCCGG	1008	TGACGTTTTATTCCTTGGCA	4516
GGTTCTAGTGAACCGAGAGG	3614	CTGGGCTCACACCTGCCCAG	1007	CAGCACGTAGTGTAGTGCCG	4515
CGTTACACCGTCACTTCAAG	3614	GGATCCAGAGGGCCTTACAG	1007	CAAGCCCCTTATGAGCAGAA	4515
TCTAGCTTTCTTGATCACAA	3613	AGTTCCATAGACCCACCACA	1006	GTGATCTCAGGACTTAAAGA	4515
GCTCGGACTTCCCAAATCGG	3613	CAATCCGGCTTAGCTTGACA	1006	GCAAAATCTCCGAAACCAGG	4515
CAGCTAATCAGCATAACACA	3609	CTGGCACCACTACATTAAAG	1006	CATGGGCCTTGTATGCAAAA	4515
TAGGTGGCTTACCCTCCCGA	3605	TCACAACCAGCCATTTGCAG	1005	ACATAGCTAGATAAGATAAA	4514
AAGATAACCTGCTTTATGAA	3594	CAATCGCCTGGGGTACCAGG	1005	CGGCTGGAAGGAGTGACCCA	4514
AGTGAAAACCTACCACACCA	3592	GCACATGACCGTCATTCGAG	1005	ACTAAGCCTCAGCAGAACCG	4513
CTTTACTCAGGATTAAAACG	3591	GCAGAAGGTAGTAAGCCAAG	1005	CAACGCCTTGCCATTAAAAG	4511
AGTTCTCCATACCAGAGCGA	3587	CATAGAGTACGGCATTCCCA	1005	CCTGTAGCATAGCTGCCGGA	4510
CGAAGACTCTTCTAAAACAG	3586	CGTATATCATAACAACTAAG	1005	ACAGGCTCACACTTTCAACG	4510
GCACAGGAACCATAATCAAG	3584	GTTGTTGCTGTCTAATTAGA	1004	CGGGCAGTTATGACGCGGGA	4509
CTAGCGTACCATCTTCTGAA	3584	TCGATCGGCCACGCTCCCAG	1004	CTGTTACTAATACCTCCAAA	4508
CCGACCTCTTATGAATTCAG	3573	GCTCTAGGTGTCCTAACCAA	1004	TAGGTCAATATTCTGCCGCG	4507
CTAGCCTCCTCGAAGCAAGG	3567	CTTGCATCTGTCATGACAAG	1004	CTTGATCATTCTCAACTCGG	4507
CTAGCCACATACGAGCAAGG	3567	CAGCCTCTAGACTCGTGGAA	1004	TCACGGATACCACAATAAGG	4506
GCGGCTTTACCCTTACGAAA	3567	ATGCTAGGTCGGCAGCAAGA	1004	ATTAAGTCTGCGCAATCCAA	4504
TAGTCCTATCACGATCAGGG	3565	CAGTTTCCAGAATCGTACCG	1004	CATTAACCCCTCATGTTGCG	4503
CGGTGACTATTCGAGACCAA	3564	CCATGAGCTACAATATCGCG	1004	CAGAGGACTCACCCTAACAA	4503
CATTTAACTGTACTAACACG	3553	CCTCCTGATACATCGACGCA	1004	GCGTGATCACAGGTGATCAG	4503
ACAACCTTAAAGTTTAGACG	3553	CTACGGGGTACTACAACACA	1004	CATCAATCCCGCAAGACCGA	4503
TGTACCCGTGCACCGCGGCA	3547	AATCTAACACCTACACAGGG	1003	ACAAGTTGATCAACACTGAG	4503
TCGCGTGTCCCTAAACTCGG	3533	CCACAACGAACCTCACAGGG	1003	CGTATGTCACAAGTAACCGA	4503
CCGACTAATCAACTTCGGGG	3529	ACGAGACATCACTTGTCCAA	1003	CTTAGCTGCCAGGTATCCCA	4502
TCTAGTGGCCTATAATCAAA	3528	CCAGCTAGTTACACAAGACA	1002	CTTGACAAAACAATATACAA	4502
CCACATACATAATTTCTAGA	3527	TCGCTCGACCCACAACAGCG	1002	TTGAGGCTTTACCAGTGCGA	4501
CCGCCGGAAATTACTAGAAG	3527	CTTATTTACCGATTTAAACA	1002	ATTACCCCATGGCTATCCCA	4501
CAGGATAACCATTCTACAAG	3524	ACTACCCTTGCTCAGCGACA	1002	ACACCATGACAGGATAGGAG	4499
CGGTCTTATTGCATATACAA	3524	CTACATACACGACTTTCCAG	1002	TCTAACTTACCCTATATACA	4499
TTTATACGTTTAGATAAGAG	3524	CAATACGGAATGCCGCGAGA	1002	ACTATGGGAAACTTGCCCAG	4498
CGTTATCCCTTAAAATTACG	3522	GAGATAACTTGACAAACAGA	1002	CAATTCCTTTGCGATACAAA	4498
CCACAAGCTCTGCATTGACA	3521	GCACGACACACGACACAACG	1001	CGGGGCGCAACCGCGAGGCA	4498
CGTTACCGAGCCTCTCCCAG	3516	CATTATATAACGATACAAAA	1001	CGTTAATCAGTTTCACCAAG	4498
GCTACGGGACTTTATTTCCA	3515	CTAGTGAGACGCCTACTAGA	1001	CAATACCCACCCATTCCCGG	4498
CATCGAGCCTTAAAATGCAA	3514	ACATTCGACTTAGCTACGGG	1001	CGACTTCCCCGGGCAAACGA	4498
CCAATCTTATGATTATCAAA	3512	TAATAGCTTGAACCGTCCGG	1000	TCTATCTCCACCCTGACAGA	4497
ATAGGGACTGAGTAGACAAA	3504	TGACTACGAACGGCATTGAA	1000	GATCGACATGCCCCGCTAGG	4497
CCACCCCGCTTACAGCCCCG	3497	CAGAACCGACAAACTAGGCG	1000	CTATCGACCACCGTTTTGGG	4496
ACGAATTTAACTTCACTCCG	3496	GCTGTAATCAGGCATATAGG	1000	CTTAATTGATAAGAGCGAGG	4496
CTGTTTCCCTCCGTGTAGGA	3492	ACGGGATGTGCCCATTCAGA	1000	ATAGTTTACCCAACGTAGCA	4496
CCATCCGATGCGCTACAAGG	3486	TTGCCTTGTGGGTTGATCAA	1000	CCGGTTTTCGCACTGCAAAG	4496
GGACCCATAACTACTCGGGG	3484	GCGTCTGGAGCGTTTCAACG	999	GTGCTATACTTTGCTACGAG	4495
TCTTACACTTTCTAGTAAAG	3473	GAATCCTGTCAGATGCCCGA	999	GCTCCTCGCGATTCACCCAG	4495
TTGACCATATATTCTACACA	3469	GCTATGGCTAACTTACACAA	999	CATAGCAACAGACAGATGGA	4495
CTTAAGCATTCTGCGTTAAA	3467	CAACGCGCCTCGACACACCA	999	CAAAAAGTATTCGAGAACCA	4495
TAGAAACAAGCCCTGACAGG	3463	CAGGCGATCCCCCTTACACG	999	CGGCCATCTAACAAGAGAGA	4495
GTAGCGTATGCTCCTATCCG	3460	CCTATCAGATTACAGATCCG	998	CTTCCTCGACAGTATACGGG	4494
TTACCCCACCCATTGTCAAG	3457	GCTACTGATAAACTGTGAAA	998	CCGCGCTAATATCATTGCCG	4494
CTATACAAACGAATTCAAAA	3456	TCGTGCTTACAACAAAGAAA	998	ACATAACACCTACTGTAGGG	4493
TTAAAAGGTCGTGCATTGAA	3456	GCGTTGCAAGTTGATTTACG	998	CTGGTTACCTGTTTGCACGG	4492
CTATTTTTTTAATATTGAGG	3445	GATCGTGCCACGGCGTAGCA	998	GTTTTACAAGCGACGTACAA	4492
CTTTACCCTTTTCTTTGAAG	3441	ACGGTAGAAACCATATGCAG	998	CCATGTCTAGACCCGTTCAA	4492
CTGGACACTGTATCACCGGA	3436	CCGGACGACCGCAATCACGA	998	CGGCTGAGAGTGTAGCACCA	4491
CAAAGACAAACCCAAAAAAA	3433	AATCACTACCCGATGCTCAG	998	TTAGCCGCCCACATTTAGAA	4490
CCATCCTTTCCATCTTTAGA	3433	CCGACCACCTCACAACTAGA	997	CGATCTAACTGGCTACACGG	4489
ACTTATACTCCCAAACCGAA	3431	GCGGGTTGCCACACATAAGG	997	TAGAACTGCATGCATACGGG	4489
CCATCCATAACACTGTCAGG	3428	CAACTACGTTGTACATCGGA	997	CCGGAGCGTAGAGCACAACA	4489
CGGATAACCCCCATTTACCA	3425	TGTGCCCATGGCCCAACCCA	997	CCGGTTCAAGCATCAAAAAG	4489
TGAGGACATTAGCCTAAACG	3412	CTGTTCGCTCTTATGATGCG	997	CTGGGACAACTTCTGACAAA	4489
CTAAACGGACGCCATCTGAA	3411	CTAGCTGATTTCCATCACAG	997	CTAACTTGCCAGTATTCCCA	4488
GCTCTGCGATAATTAATAAG	3409	ACGTCACCCGAAGCACGAAG	997	TCAACACACTAGCTTACCCG	4488
CAATCCTAACATAATTCCAA	3398	GCGGTCCCAGAGAATTACAG	997	CCTTCTGCAATATATTGCAG	4487
CTGGTCCGTCCACTGCTCAG	3396	CTACTGCACTTAATATAGCA	996	GAATAATTAGACTTGCACAA	4486
GCATATACAGCGTAACCCGG	3393	CCAAGGTCAAATTAGTCACA	996	GTAACCCCCATCGATAGGAA	4486
GCTCTCGGATACTATCACGA	3386	CAGGGGTAACTGACTTTAGA	996	CCTCTCTGCCGCATACTACA	4486
TATCCAATTATATCATGAGA	3386	CCAGCGCATGTGACATACCG	996	CTACCCTGCTAATATTACAA	4486
GAAACAGGCAAATAGTCAAA	3384	CTTCCTGACCTGGAAACAAG	996	TTTGAACCAATCCTGCTCGG	4485
CTTTATTCCCTCTTAATCCG	3380	CAGCCCAACTGTGCAAGCCG	996	CTTAGGCTAGACTAACTGAA	4485
CCTGTGATATATACTAGCCG	3380	CCAGCTGCATAGCCATACAG	996	CAGCTCCTTTTCGCTTAAAG	4485
ACATAAAACAAACCAAACAG	3376	ACGGGTCGCATTTAAACACA	996	CCAACCCATGTCAAAAGAAA	4484
ACTCACACCCATGATTACAA	3371	ACGATTGGTGTCACACCACA	996	CGATGAAGATCGAAATTCCG	4484
CCATTGGGATGAGTTCAGCA	3368	CTATTCTCAGCCATACCCGG	996	CCTCACAAAAGTCATTGCGG	4484
CTTCCCAGTACATAAATACA	3360	TGGGAAGGTCCGGAGCAGGG	996	CTTTCCGCATCTGCGCCAAG	4483
AGTCCACTATTCTTTTTACA	3344	ACGGTATACATCCTACCCGA	996	GTAACCTCTTGAGTTCGGGA	4483
AATTACTGACCAGAGTAACA	3342	CCGCACACCCACCTGTCGAA	995	TGTATCCGAATGTAGTTGAG	4483
GTACAGGTATATGTGAAGAA	3335	TCACGTGCCAACAATAACAG	995	CATGGGGCCGGACCTAGCCG	4483
CTACCCATCCGAATTTGCGG	3325	CAACAGAGTTCCGATCAGAA	995	TGGCTCTGCGATTTTCACAG	4481
TAGAGCTCTCTCTCACTAAG	3324	CTAGCCACCACCGATACAGA	995	GCACCATATGGCTTTAGGAG	4481
ACTAGCAGTAACCCGCAGAA	3324	CATTGGTTCGCTGATCTCAA	995	CAGACTCGTCATAAGATAAG	4481
GATATAGTCTACTATCACCA	3319	CCACGGGATGACCCGTCACA	995	GTAAACTACTGGACGAGAAG	4480
GGACGGACTGCATTATAACG	3314	ACGAATGTTACGCTTATCAA	995	CGATGACCTGCGATGAGAAG	4480
AAAAGAAATATCTAAAGACA	3313	CATGCCCGTTGCCTGCCGAG	994	TATGTACCACCGGTAACAAG	4480
ATTTTATGATTCGCTTCAAA	3305	CTGGCGATTAGGGTATGACA	994	CCGTAACTAGAGGCACTACA	4480
TGAAGGTACGTTCCATTGCG	3288	CCTCCAACCTCGTCTCACAG	994	TGTGACCCTAGGTTACTAGG	4479
CGTTTTTGATAACTGTTACA	3283	CTTGCTGTATACCCTAGAAA	994	GCGTCACTTTAATATCTCAA	4479
AGTGAAAATTTTCTACCCCA	3281	ATTCCCCTTATGTCTATAGG	994	CAGCACTACCCAGTTCCGGA	4478
CTTCTTTGTTCCTTAATAGA	3280	CCGATATGCCGCACGAAAGG	994	CCACCTTGTCCCTCGTCCAG	4478
CCTTTTTTTCCATTTCGAAA	3279	CTAGCCCCACAGACAAGCCA	994	CAGTGGGCTTGATAGCACAG	4478
AAGCCCCTTGTCGCGATCCA	3278	ACGCGCACAGCTCCACAAAG	993	CAATGACCAAAAATACCAAA	4477
TAAGAATCCCTCCTGATGAA	3270	CTTTACTCAGGACCATGCGA	993	CCAATTGCTGTATCTAAGGG	4477
CCGTGACCAGGAACGAACGG	3265	ACTCAAACACGGCAGCCACA	993	CTGAGTAACCACACGTGCCA	4476
CATTTAAATCTTAATAACCA	3258	CGTCCGCGATAGATAACGAG	993	GCTTCCACCCGTATACTGAA	4476
ACTTATTAAACCTAGTTACG	3257	CTGGTCGCTTATACTATCAG	993	CGTGGTAAAAAACAGTCAAG	4476
GCGAGCACATTCAAACCAAG	3254	TTGTGCTCATAGGCTTAGGA	993	CCACCTGATATCCTACGCCG	4476
CTTCAGCGCCACACATTCCA	3252	CGGAATCACGGAATGAAAGA	993	ACATCAGATATCAATTAAAA	4476
CTACCTCTACCACTTCCGAA	3250	GTATTGCGTGAAGAACCAGA	992	GGACCCATAACTACTCGGGG	4475
ATAGTGACATCCCTGAACCA	3248	CAAGGGACTAAACCTAAGGA	992	CATTATCACCTAATGTTCAG	4474
TAAGACAACAGGGATTACCA	3247	CAGCCAACCCTAGATATCAA	992	ATAGAGCAAACAGTTAGGAG	4474
CATTAATTCAATTTTCCGCA	3247	ACATGACCTTGGATAACCGA	992	AAGGTATCTCAACAACTGAG	4474
CCTTGATTCAGCACATAGCA	3245	CCATTGCAACTACTGCTAGG	992	CTTTCCTGCATAGAATGACA	4473
CTTAAATGCATCGAAAACCG	3242	CGTGGCCGTTCAGTTTACGA	992	CTGTACAATCAAACTAACGA	4472
AAGCAGCACAAAACGCTCAG	3241	CCATCTACTCTCCCTTAACA	991	CGATCAGTACGGACACGAGG	4472
TAGTTGTAAGGCCTGCCACA	3240	CCGCGTACCGAGGCTCTCAA	991	TAGGACCATCTCATTTGACG	4472
TGTCCAGAAAACGTAATCGA	3240	CGTAGTTATGATTAACTCCA	991	CGTTCACAATACCCAACAGG	4472
AGGGCATGCAGCTTGCCCCA	3239	TGAATCCCAAGGCCGAGACG	991	CCGGAAAGAAATCCACGCAG	4471
CTTGTTTAAATGCTATAACG	3239	CCAGCCTTATTGCTAACAGG	991	ACGGGGGTTGCCGATCTACA	4471
CTTTCACTCAATGAATCCAG	3238	CGGCAGGGCTGCTTGTTACG	991	TTACAGTCTGCTGTTCCAAG	4471
GTTTCAGGATTTTTTCGAAA	3237	CAAAACAATACGGCATAAGG	991	TAAATCTGCGGACAGTCGGA	4470
CCAACGTGTATGCCATACCG	3235	AAGGTAAAACGTCATTCCAG	991	CAAGGTCACTTGTCGTACAA	4470
CGTGCATTCGCATTGTTCCA	3235	GCTCATCCCATAATGTCAAG	991	GGGCAGACCCACCATCTGGG	4469
AGACCTCGATCGGCGCTGGG	3235	CGGACCACAGCCGCTACACG	990	CTACGTATAGAATCATCCGA	4469
CCTGAGTGCTAATAAACACA	3233	GCAACTTGTCGTGCGCCCAG	990	CATATTCCATAAGATCTGGG	4469
CTTGGGCATCCGCCTTAAGA	3224	CATTCCCGTTGGGTTACCAA	990	CCTGCGAATTGGGTGTGAGA	4468
GCGGGGGCTCCACCTAACAG	3220	CCAGAACGAGCTATGCCACA	990	CTAGCACTAGGGTATATCAG	4468
GTACGTAACCAATTGCCCCA	3216	CCAAGCCGACCACCGCCAAA	989	GGAGACATAACGCAGTTAAA	4467
CAAAGAATTGTCGAGAAAAA	3214	CGTGTACCATTACCAACCAA	989	GGTTCACCTTTCATGATAGG	4467
CAAGCAGCTACCATTTCGCA	3211	CCGGGCGATTATGCGTAAAG	989	CTTACCATTAGATTGAGCAA	4466
CGTTGAGTTGGTCATCGGAG	3204	CTAGCGAATCAGGTACCGAG	989	ACAACATCACAGGAACCCAA	4466
CCGTCCCAAACTCAGCCAGG	3203	CCAGTCTCAAAGATTCGCGA	989	CAGCGATGTCTTACAACCGG	4466
CAAGTAACTGAGGAACTGAA	3203	CGATACCATCATCATTGACA	989	CCTACATTCACACAGAGGCA	4466
GGTACCATCCCTGCGTCACA	3200	CCGTGTGTCCAGCTAATGAA	989	CCACCTCGAGTAATTCGCCG	4465
CCTGCTGTTACTCAGTTCGG	3200	TGTTCTACTAGTACTTCAGG	988	ATAGTTATACGAACATTAGG	4465
CGTAACCTATGTATTTTAAA	3198	CTGCGGTCTCCCCAACTGGA	988	GCTTTGTATAAATCTCCACA	4465
CCTACTGATGTCACTTGACA	3198	CATGAGACAACCCTACTGAA	988	CAACATAACAATTATCTAAA	4464
ACGGTACGCCAGGAACCCGA	3195	GCTACAACACTTGCATTCAA	988	CGACGCTGAGCTGCACTGGA	4464
CGGCTATGCATCCTACCAGA	3192	CTGCACCATCCCCAGACAAG	988	CGTGTCTGTGCAGATTCAAG	4464
CATAGATCTAAACCTTGCGA	3187	ACGATCTAACATGTTTCCCA	987	CCGGGTCCTAGAGTAAGCAA	4464
CAGCCAGACAACAAAAACGA	3187	CCAATCGGAAGATAAATCCA	987	TCGCCGGCTTGTGCGCGGGG	4464
TTGCAGACATGAAATATCGA	3186	CTACATATAATAATACCCGA	987	CCACCGTCAACACAGTGCGA	4463
CTTCGGTGCTACAAGTGAAG	3186	CCGAACTCACCTGCTCGCGA	987	TGGTCAATAATATAACCGGA	4462
GTGCTATACTTTGCTACGAG	3185	AAACAACCAACCACGTGCAG	987	TGAACAAACGGGCTAATGAA	4462
CCAGACCAATGCAAGTTAAG	3182	TGTCAAATAGGGTCTTCGCA	987	CGAGTACCTACACCTCTCCA	4461
TATGATTGTCCATTTTTGCG	3179	GTTCTAATCCCAAATTCGGA	987	GCGTCGCTACAGTTGTCACA	4461
AAGCCAAATGTTTAATTAAA	3171	CTAACCCAACCGTTAAGAAG	987	ACATCCTTTAGATCGCGGAA	4461
ACTGACCTCAAGACTCCACA	3170	CTTGCTACCCGCAAACTCGG	987	CGGGATACAAAACCACAGAG	4461
CATTACCGAACCACACGCGA	3167	CGTCTCTCCGGCCCGCCGGA	987	CTGCACAAACACTATAGGAG	4461
TATGTAACCAAGCAGTGCAG	3165	CAGCCACTATTAGAGCTCCA	987	ACAAGGGCCCACTTGCTCAG	4460
ATAATACCAGTAGCACCCAA	3161	GCGTGCTTCGGGACATACGG	986	CCGATGCCACTCCCTCGGGG	4460
CTTCCCGGCCCGGTTCAAAA	3153	CGACAACCCGGATATTGCAG	986	ACGCGCGCCAAAAATCGCGG	4460
CGTAGTTCCCCACAAAAGAA	3153	ACTCGAGACTGTGTTCGAAA	986	CGGCCTGGCACCTCACAAGA	4460
TTAGGGATTTAGGTAAACCG	3152	CCGTGAACCTTGCTACGCCA	986	CCAATCAATCTAATGATGAG	4460
ACAGAACAAAGTATAACGCA	3151	CATGTAAGCTAGGTTACGGA	986	CGAAGAAATCACGTGAGAAA	4460
CCGCCGTCTATTACATTCGA	3150	CAATACTGTCCTACGTGACA	986	CTAAGTTGCCATCCAAGCCG	4460
CCTCTCGCCAGCCATCTCAA	3149	CAGGTCCGCACAACAATGGA	985	CATATTACAGATTTAATCCG	4459
CGTTAAAGTGTAATGCTACG	3144	GCTCTCTGATAATCACCAGG	985	TTGTCCAGACACCAATCGAA	4459
CTAACGGATCTTACTTGGGA	3143	CATTTCAGACCCTCGATACA	985	CATCTTGTCTGGCATTGCAG	4458
GGTAATTTAGAGGCGTACCG	3141	TTGTCATTACTCCAGAACAA	985	AGGGCCAGCTACTATATCCG	4458
ACTCCATTTGTCACTATACA	3137	CCACGGGTAGGGCTACAAAG	985	CGGCGACCATGTTAGCAAGG	4458
CAACATAGATAGCTGTCCGA	3132	CATGGGTCAGTCCTGTCAAG	985	CTTGACTTTGGTCTGCCAAG	4457
ACAGACTATACTACTTGACG	3130	CCGTCGGCACGGTTGATGCA	985	CGATCAAGCGACTCTAGGAG	4457
CGTTTCTATGATCAATCCCG	3123	TAGATCAAACCAGCAATGAG	985	TCACACACCCTACTATCAGG	4457
GGAGAACTAGAGCCGTTAGG	3119	ACTGTTGGCGAGCCTCGAGG	984	TAGATGTAAGACCATAACGA	4457
CTAAGACACTAAGTGACACA	3114	TCGTACACTCCGCTATAGGG	984	CCGTTCCGTCAGGTGAGCCG	4456
AAGCAAGTACTGGCTAGCCG	3108	AAGACAATACTTGAGACGAG	984	CGGCACTCTGGAGTTTTGCA	4455
ACAGTGTTAGCGGATAAGCA	3105	CGGGATACCCAGACGTAGGG	984	GAGAGTGCAACGCCATAGAA	4455
TCTGAGGAAACATTTTACCG	3095	CAAGGTTAAGGCAATACAAG	984	CAACCACATCAACAAAGACG	4455
AAGGTGATTTAGATACTCGG	3093	CCGGCTCGTCGCACGCAGAG	984	GCAGGAACATGACAAACAGG	4455
CTGTTCCTCCGGTTGCTCAG	3091	CGTCACCACCACCAGTAGCG	984	CATCCTAAATTACTTATGCA	4455
TGGCCCTTTGTGTATTCGAA	3089	CCACGGATAACCATAAGACA	984	GCTACGTATATGTCATACCA	4454
TATCCCGCTCTGTTTACCAA	3072	TTAGTGCCTATGTATTGACA	983	CCGAATCCCGCTCAATACAG	4454
CTTGGAGACAGTGCGATCCG	3062	CTATCACCACAGGTTCCCCA	983	TATCCGAGTGACATTTAGAG	4454
CTGTTTACCTAAACTTGGCA	3062	TTACAGTCCGCACTGCACGA	983	CCAGCCCCATTTACGCGCCA	4453
CGTTGTACAAAGTTGAACCA	3061	GAGCGGGGCCCGTCGCAGCA	983	CAAGTATCTAACACTCCACG	4452
AGTATATTCTCGTCTACGGA	3060	TTATGTACAACACCGCGCCA	983	TCTTGAGGATCCTCATAAAG	4452
TAGAGATAATTAGTTTGAAG	3052	CTTGTAACCCGGCCGTGCAA	983	TGACCGAAACGTCCGCGAAA	4452
CGAAAAACATACCAGTAACG	3048	TAGCTAAACGCAGAGTCCAG	983	CATAGAGTCACCTAGCTACA	4452
AGAACAGCATTGCATCCGCA	3040	CCATACCCTAACGATTAAAG	982	TATTGTGACTTTATAAGCAA	4451
CTTAGTGGACCGCTGCGGGG	3034	GTTGGACAACATACACTAAA	982	AAATGTACTGAATCTCGGAA	4451
CATTATTTTCTGAATACAAA	3033	CCGACCTACCAAACTATCGG	982	CTACTCCCTCAGCTAATGCA	4451
ACTATACCTTTGCTGACGCA	3024	CCACGACCCCCGGATTCACA	982	CTGGAGCGAGATTATCCCGA	4450
ATGACGAATCCGGAATGGAG	3021	CAAGGTACTCAAAATTACAG	982	CTGACACGCCGATCGTCGCG	4449
GGTTGATATTACCCGCTGAG	3017	AGGGCCAGCTACTATATCCG	982	AAGGACGTTGCCACATAGCA	4449
TCTCCGACATATGCTCCACA	3014	CAGCCGTGACCCTCTCTAGG	981	TTGCAGTCAGATACGTCAAA	4448
ACACTTTAACTTGAGTAGCA	3013	AGGGCATGCAGCTTGCCCCA	981	CTTGATAGCACGTTTCGAAA	4448
ACGGTTTCACAAGAACCAAA	3011	TTAGGACCTGTCCATCTAGA	981	GCGGATGTCCAAGCGTTGGG	4447
TGAGTAACCGCGATTATAGA	3005	CATTTAAACTACCTGCCGAG	981	CGGGTTCACCATATATGCGG	4447
GATTCTTATAAGTTACGGCA	3004	CCTCATAGTGACCCTAGAAA	981	GCTGCATGCGAACATTAGGA	4445
TATTAGATTCCCCCTTGGAA	3003	GGAATGTATGGAAATCGGCA	980	CCGTCGACTACGCATTCGCA	4445
ACAACTCCTTTCCTGATACG	2995	CAGAGTACCAATCCGAACAG	980	CCACGCACAGTGGAACAGGA	4444
CGATTGGGCTTGCTTCAGCG	2993	CCAGGACGACCGCTTCTCAA	980	CGGAGAGTATGCATAACCAA	4443
CTAGTGTCCCTTGAATAAGG	2990	CGTCAATACCATCTGTAAGG	980	GGGCTGATCGCGTCGTAACG	4443
CTAGCCTCTGTTACGTGCCA	2984	CGAGATAACTGACCGATACG	980	ACGGGCCATGACCTAACGGG	4443
CGGGGAAGCTTCTCAACGGA	2983	CATAACTCATACGATCTCGG	980	TAAACTATAAGTGAAACAAG	4443
CAAAATGGCCAGCTAATCCG	2981	CATTGACCACAGTTGACAGG	980	ATAATAACCTTAGATTCGCG	4443
GTACTACCTGATGTGCAGGG	2981	CATTAAGCTAGTCCACGGAG	980	CTATACCTTCTTGAATACCG	4442
CCGTTACCCGTGATATCAAA	2980	CAATCTCGTTAGTAACCCCA	979	TAGACAATAACTGAGCGCAG	4442
CTAGTCGATCCGCTTCGGGG	2978	GCACGGGAACACTTATAAAA	979	CTTACAATAAACAAAATCAG	4441
GGGGCCGGATTGGCAATAGA	2972	ACTCTGATCGAGGCTACCCG	979	CATGCGTCTGTTTCACAGAG	4440
CTGTCCGCCGACACGCTAAA	2971	GCGCCTGCAGACACGTCCGA	979	ATACTAGACAGTCCGACAAA	4439
CTTACGGCACGAGTTACCAG	2970	ACTGCGTCCGCGCCGACACG	979	CAGAATATAACCTCTCAAAG	4439
GCAACGTCTCATGAGAGCAG	2958	CTTGAGACCTGTAAATCCGG	979	TCGATGGCCTCATATACAAA	4439
GAGCCGCGATTCGCTCCGAA	2952	AGAAGATATGATAATAACAA	979	TAGACGCACTAAGCATCAGG	4438
ATTAAATTCTACCCTCCGAG	2951	CGACCCGTTAGCAAGCCCGA	979	GGGTCAAGACTCCAGCGGAA	4438
TTGCCCAATGAGGATCCCAG	2951	CTGTGAGCTTTCGAGTTCAA	978	CAGCGTGACACCTTTAACGG	4437
TAAGACCCTATTCTTCAAGG	2949	TGATATCCCAGTGCATCCAA	978	CTGGACACTGTATCACCGGA	4437
CCGGCCGCTCCTCAGCACCG	2944	CCTTGATTCAGCACATAGCA	978	CCTGATTTTGTGCCAAAAGA	4437
CAGTGTCGTTGCTTTTTGAG	2942	CGGGCACTATTGTATCTACG	978	GCTATCCACATCTTATGACA	4436
CAGTGATGATGAACGAGCAA	2940	TGTGTTCTAGTAGTTATACG	978	TAGCCCAATTGCATGTGACA	4436
CATCACTCCCGGATGTCCCA	2940	TGTACTCCTCACCTAACGGG	978	ACATGTTTCAATACGTCACA	4435
CTTGGGAACCTTATGAACAG	2934	CATACTTAAACCCCAAACCG	978	CGGCCTACAAGTACATCGAA	4435
CTGCTCCTCGCCTTTACCCA	2934	TCGACCCCAACGATGCAGGG	978	TTGATCACAGGTACGTTAAG	4435
GTATTCTGAAGACATTAACA	2929	CAGAGTACCTGGCATTGACG	978	CATATTAGAAACAATCGCAA	4435
TCTCACCCCTACGCTTGCAA	2928	AGATCCACTGTGCTGTAACA	978	CAAGCCCTCTGACAGTGGGG	4434
GCTCTTTTTTTTGTGAAAGG	2927	GATCACCGCGTACTTCCACG	977	GTAGCAGATGATACGTGGGA	4434
ACTGCATCTGCCCTTCACGG	2922	TCTGGCCCCTGCGTACTGCG	977	CAAACCTGCCGATCGTGAGG	4434
CCTCTATTACTGTCACCGCA	2920	ACGATAGCAGCAGTGCCGAG	977	CAAATACCTCAACTACAACG	4434
CGGGATACAAAACCACAGAG	2918	ACTAGACACGCTACATCACG	977	CCACGCGATCCAGATAAACA	4434
CCTCGCAGACAACTATCCCG	2915	TAACCCGGCGAAACATGCAA	977	GCGCCGCTTCGGCCGAACGG	4433
CTATCTGACTAGGCTCGGAA	2906	CCAGTCTGATACCAACAGGA	977	ACAATAGCAACAGTTTGCCG	4433
CCTCACTACAATGTTTGACG	2905	AATCCCACTCTTACATAGCA	977	GGTTCTGGAAGTCTTTGCCG	4433
CTGTTCACAGGGGTGCAAAA	2902	ACACTGATTATGCCTCCACG	977	CAATCTGGACTCTTGAGCCG	4433
TTTATTTTTAGGTTATCGCA	2898	TTAGACCGTACACCACACAA	977	CTACCCGACCCTCCTCAAGA	4433
GCGCTGTCACTGGTGTGGGA	2885	CATCTCGGAGGGCCAACGCA	976	ATGAATGCAAGACCGACAGA	4432
CATCCCCGATGAGTTACCCG	2882	TTGAGAGCCAAACAACTGCG	976	CTGACATCTACAAATCTCGG	4432
TGAAAGTTCACCACACGGGG	2882	TGTGTATAAAGCTAGCTAAA	976	CGACTAGGACCAGTAAACGA	4432
CTAGCACTAGGGTATATCAG	2874	GCATATACAGCGTAACCCGG	976	ACTAAGATAGCGTCTCAGGG	4432
GAATCAGATATCTAGTGAGA	2871	GCTGGATATGTTGCTTGCCA	976	CTTCAGGGTAATCCATTACG	4432
CCAGGGTGTTTGAAATCCAA	2870	CATCCCCGATGAGTTACCCG	976	CCAGCCTGATATACTCCGAA	4431
CATTTCCAAGGCGAAACCAG	2869	TGGACTCGATCACATACACG	976	CCTCTCAACCCTCCGTAACA	4431
ACTGTCACAACCGTGTACGG	2868	CCATCAATATATATGTCACA	976	CCTCGTCAAGCATCTTTAGG	4430
ATATTTCACAACAATACAGA	2867	CATTTAAATCTTAATAACCA	976	CAATTGACCCACTTGCAGGA	4430
CCATCATTCTCTCCACCGAA	2867	CTGTCTATTCATACTCCACA	976	GGATAACAAGGTACGTTAAG	4430
GGATATCATCCCCTAACAAA	2865	GCGCTGCCAGACCCTTCCAA	976	CTATGAGTTCAGCTTCTGAA	4429
GCATAATTTACACAAACAGG	2865	CCAGACGTACACGTTCTCCA	975	CGACCCCCATAATCACAAGG	4429
GGTCAGAATGGAGTACTGCA	2864	AGGGAACGCCGCCATACAAA	975	GTGACGACAATGGTACGCAA	4429
GTTGTTGCTGTCTAATTAGA	2857	CTGTCCTGCCTGGCAACGAA	975	TTAGGGATCGAGCAACCGAA	4429
CCGATTGCTAAAGTAACCGG	2850	CATAATTGCTCAGAGTAGAA	975	GGATCACGAACAGCGACCAG	4428
CCTGTTGATTTGTTACCGAA	2845	CGTAACTCATAGGCACGGAA	975	ACTGGCAGAGCAGTTCTAAA	4427
CGATAACGAACCGCGTCCGA	2837	CATGATTCCAATGTGCGCCG	975	CCAGCTAATACACATACAGG	4427
CAACTTCCTGACGTTTCACA	2836	TGGGCATCCGAGGTTCGAAG	975	CGTCTCGTCGACGTGCAACG	4426
CATATTCGATGAAAATAGCG	2829	AAACAGTTACACATTATCGA	975	GTTCATATATCCCAACACAA	4426
ATACGAGAAAGACCAATGGA	2828	CTTTTACCCCCGTAATAACG	975	CTGTCCTGTGCACAATCCCA	4426
ACTGGGCACCTAACTTGGGA	2826	TCTTGCTGATAACTGCGCGA	975	GTAACCAAACCCCTTTCACG	4425
TAACTTCTAATAGCAATGGG	2825	CAAGGCCTAATGACGCGAAG	974	ATACGGCTTGCAGCTAACAA	4425
CCATGCCCCAACGAGAAACA	2822	CTGTCGACAGTAATTATACG	974	CCGACTTTACAGTTGCCGAG	4425
CTACATAGTACGCAATCCGA	2820	ATGGGACAAACTTAGCCAGA	974	GTTTGGGACTACTTTACCAA	4424
TAACCAAGAGAATCGATAGG	2819	ACACTCGAACCAAAGTGACG	974	TAAAATCTTCATTCTATACG	4424
AAGAAAACACGGTAATGGCA	2819	CGGGCTACTTAAATTCTGAG	974	CATCTGTCCTAAGCTCGAAA	4424
CTGCCTGACCCATTTTACAA	2815	CAATTATTCTCAAAACCAAG	974	CCTAATCACTCCTTTTCGAG	4424
CTAGTCTTCTTGTAACGCGG	2813	AATAGCGGACTCCTAACCGG	974	CCTTACGGAACACCTCTCAG	4423
TCAGGGCTCCGCGCGAGGGA	2812	CTGCCACACGAACCTCCCAG	974	CGGTATCCCCCTGAACTGCG	4422
CCAGGGTCCCGTATTTAAGA	2811	CAAGGTCATGACATTTTACG	974	GGGGCTCCTTTGCAACACCG	4422
CCAGTTCGTTTAGTGACGGG	2809	CAGGTCACCTTTACGTCGCA	974	GAAGCTACAAACTTGATACG	4422
CTTAAAGTATTCAATCTGAA	2807	ACAAATAGCCATGCGCGGCG	974	CAGTCACACGACTAAACCAA	4422
TCGCATTATGGACATCCCGG	2802	TAGCAGATCCGGGATCCCCG	974	GCTTCCGTCACAGTGTACCA	4421
CAAGGTATTGAGGCTAAAAG	2801	AGAGTGGACTGTAATTGGAA	974	GCAGCGGTTTTTGCAACGGA	4420
TGACACCCTACTCAACCCCG	2799	CAGAAGCATATGTTGCACAA	974	CCGAAGAAATCTATTACAAG	4420
AAACAGGTACCCTAGCAGAA	2795	CAGATCAGCCTAAAGCGCGG	974	CATAACTCAACGGATATACG	4419
TTTCTGCGAAAATATCCCGA	2794	CCGACTCCAATACTACAGAA	974	CCAACTCTAATGTTGCTCAA	4419
CCAGACACAGCTCATATACA	2794	GCGGCACAACTGTAGTTAGG	974	TAACTAAAAGATATTTTACG	4418
CCACGAAAATAACTAACCAA	2789	ATAGGCCATGGGCATCTAAG	974	TCAAGTGCTATTTTTCCGCA	4418
CCGGTTCAAGCATCAAAAAG	2781	ACGGCCAAACCTGCACGGGG	974	CTTGATTCTCTGAAGTCGGG	4418
TAGCCATGTTAGCCTCCAGA	2780	CAGTATACAGAACAGTCCAA	974	CAGCACACAATCCTTTTACA	4418
GTTTTACAAGCGACGTACAA	2777	CAGCAGGCCGTCGAGCCGAA	973	ACGGGGGTTTACTCTCTAAG	4417
CCACGACTCGTAAATTAACG	2776	CATGAATATCCTACTTAACA	973	CGGCCCTTTTCATCTACCGA	4417
CCTAATACACGGTTTCCCGG	2774	AGAGTCCCTAATGATACACA	973	CGAACGTCAGTCCCTATCCG	4416
ATAAGCACTTCACAAATACG	2773	TATATAGCCCAGGATAAGAG	973	CCTTAGCCTCTCGTATTCCA	4416
CTTTTTGATTTTTTAATCAG	2771	CATGCCTGTCGACCACGACG	973	CATGATCATCCCGCGATCGG	4416
AAGCGTGCTACAACTTCAGA	2762	GCTGGTACTATGTAAACGGA	973	CATATCCCAATGTTATCAAG	4415
CAAGGGGCCCCCATAACGGG	2758	TAACACCAACAGGCTACACG	973	CATGCCGCTGGATCACAGAA	4415
TCGCTATATTTCGCTCGGCA	2756	TGAGGACAAACGTAACTAAG	973	CAAGAACGCACGGCGTTGCA	4415
CGTTGCTATTACGAGCCGAG	2753	CTTAGCCCAGTTGCTAGACG	973	CTATCTCGTGTAGTGTAAAA	4415
CATATACCATCACTTAACCG	2752	CTAAAAACATATCAATCGGG	973	CAGTCTCCTGACGATTAACA	4414
GGGCAAGGTGCACATCCCAA	2752	CTGTTCGGTCCCGTGTGACA	973	CTAGCTGCAAAAGCTAAAAA	4414
TTGTGGGTCGGTAAAAGGCA	2750	CCACGACTCGTAAATTAACG	973	CTGTACGTCGCCCTATCCCA	4414
CGTCCCCCAGGTATGATGGG	2736	GCGCTAATCGAGCTTACAAA	973	CTAGTTCGTTGTGTGCGAAA	4414
ATTTTAGCCGACTCACTAGG	2735	GCGATAGCCCAAATGTGACG	973	CTACTACGTGCTCTAAGACG	4414
CATATGTTACTGACATGAGG	2732	TATCTAATTGGCGCGTCCGG	973	TCAGGCCCCTGTCAGTTGGA	4413
TGTCCGACCAACGATTAAGG	2731	TTAGCATTAACAGCAAGAAG	972	TATGGACGTCGAACACAACA	4413
CTATGACCCCAATTACGCCG	2728	GCTATCTCAGCCCCACCAGG	972	GAGAGGTTCTGCATACGAAA	4412
GCATCTGCCCCCTCGCTGCA	2721	CTGCTTGGAACCACTCAAGG	972	GCTTTGAAAACCACTTAGGA	4412
TAGCGACTCAGATTTTGACG	2721	ACATCTGGCGTCTCTACCAG	972	GCTGATCTACAATTTAGCGA	4412
CTTGTATATCTTTAATCCAA	2721	GGTACATAAGAACTTCTAAA	972	ACTCCCTCCGTCTCATGGAG	4412
TAATCCCTTCTGCCTATAAA	2718	CCGAACCATCAAATGACGGG	972	ACTCCGCCTAACTCTCACAG	4411
TAACCCTCACGATCTTTGAA	2715	TTAATAGTTAAGGATATCGG	972	CTGCCACGCCGCGCGAAGAG	4411
CTATGCGTACCAGAACAGGG	2712	CATGTGTTAGCTGAAATCAA	972	TGTCCCTGTTACGCACGAGA	4411
CCTGCTCTCGTAATATGCCA	2711	CTAGCAGGTGCATCACCCCA	972	CCTCCTGTACCCCCATAAGA	4409
CAATTTACCCATTTTCCCAA	2707	CTTGCAGGCAGCTTGCTGAG	971	CTTACTCTCCCAGCATGAGG	4409
CCGGTGTACCGCGTGAGCAA	2706	GCTCGCACACAAGCTTACGA	971	CTTTGTACACATATTACAAA	4409
AAACTCATAAGGGCATTGCA	2705	GGATACCTTTCGACGACGGA	971	CCGAAAATTCAGGAGTGACG	4409
GCAGGCTGCCATTCGTTAAA	2701	TAGGTACTTCTCGTAATCAG	971	TGAGCCATATCGAAGCTACA	4408
CAGGATTATTATCAATGGAG	2695	CATGCCGAATTGTAATAACG	971	CAGTAGAGAGAAATACGGCG	4408
ACACCGAAAACGCTTACGAA	2689	AGTCGACCCATATTTCTGCG	971	GTACGGGATAACTTAACCAG	4408
ATTCGAGGTCCTTAGACCCA	2688	TAGCGAGCAACACATTTGCA	971	CTAATCACATGTGCTTAGCA	4408
GTACACCAACCGGTATACGG	2681	GGAGAACTAGAGCCGTTAGG	971	GCATTGGCATTGCCATCAAG	4407
CAAACAACCAGCATTTCAGG	2680	ACTTCCTCACCTATGTTACG	971	GCGTCTTAATCCACTTCGGG	4407
GGACGCCTAATCCCTCTAAA	2680	GTGGCAGGTGCCAATACGGG	971	CTGATAGAACACCCAACCCG	4407
CTTTACTGTATTTATCCGCG	2679	ACTTGACAACAATATACCCA	971	CGGCTTCTATATGTAAGAAA	4406
ACTGTACATGGCCAGATCGA	2676	TAGCGCCAACCAAAGACAGG	970	CGAGAAACCCACACATCGAG	4406
CTATGCATATGCGATCCGAA	2675	CCGTACGGCCCTGAGCGCGA	970	CTGCGAACTGGTAATTCCGA	4406
CTTTTACCATACGAACCAAG	2674	CCGGTGTACCGCGTGAGCAA	970	CCGACTTATTCTAAGCACAA	4405
CCAACAACAGTCCATTCGAA	2671	AGACTAAGACCATTAACGCA	970	CTTGGTATTTACCTTTAAAA	4405
CGTAGGTGATACGTTCTCGA	2670	TATGGGATCAAATTAAAGCA	970	CCTTTGAATACTCAGTACAA	4405
CATAGGACCGAACATATAAA	2663	CGACCGCCACCCTAGTTACA	970	CTTTCCAGTACCCTGAGAAA	4404
TATTCCTCTCACAAAACGAA	2662	AAGGCGGACCCTCAGCGACA	970	AGTGTGTGAGCGATATGGGG	4404
CATGCAGAACGATATTGGAA	2659	ACTTCTGAATCTCAGACCAG	969	GCATGGTACCGGGCGAACCG	4402
CAGCGGTGCTACTAGACCAG	2652	ACTGTAAACGATATACCGGG	969	GCGGTTTGTACCACTTAAAG	4402
CTTGTGCTCTTGTAACAACA	2650	CTGTTAGCCAGATCAACAGA	969	TCATGAGCCAGTCAGATGAG	4402
ACGCAGGTTTGCTTTTTAAG	2650	TCACCTACTGGAACACTGGG	969	CTTAGATGACATAATATCCA	4402
CAAGGTGTTATTACAACCCA	2649	ACGACGGGCAGTGTACAGCA	969	CTAGATAATGCCGAACCCCA	4400
CAGTGTATAACAATTAAACA	2642	AAAATAGACTTATAGATACG	969	CCAAGGGTTCTACTACTCGA	4400
GCACCTTTTCTATTTTGGCA	2642	CCGAGAACTGTGCAACTCAG	969	CCGGTCTCCGTGATGCCCAA	4399
CGGGGGATATCACCGTGACA	2641	CCATCGATAACAACGTCCCG	968	CTTCCCGCTACGTAACGACG	4399
CCACTTTTCCGGACGCGCGA	2641	CAGGATCAAACTGCTCAACA	968	GATCCGGCAAGCCAGATGAG	4398
CAGGTACCAGACGATCTCAA	2635	TGACTCATCCGTCTGAAGGA	968	CTTCTATGTCCCCTATTAAA	4398
CAAAAAGACGTAACTAAGGA	2634	CCAGATTACCTCCCGTAAGG	968	CAGGCTAGTGTATTATAGCA	4398
CTTTTTTCTATGCCTACCAA	2634	CATGCCCGAAACTTACGCAA	968	GTACACCCATAATTTATGCG	4398
GTACTATCAAAACAACTACG	2633	TCAGCCTGCCCCAAGTACCA	968	ACTCGCACTCTCCATCTCGA	4398
AATTCAGGCATCATGTCCCG	2631	CTAAAGTAACACTAATTAAG	968	CAAGCGTTACGGGTTACAGG	4397
GCATGATGAAACCTGTTCGG	2630	CCAGTTTTAACCTCGTAACA	968	CATGGGCTCCGCTCGCGAGA	4397
CGTCATTTACCTGTGTACAG	2629	CTTCTTTACCCTATACGGGA	968	CATTAGTTTTGGGCGTTCAG	4396
CTAGGTTGCCCATTGTTGAA	2628	CTGACCCATCATTATAGCAG	968	CTAACTCTTGAAATGAGCGA	4396
CCTTGGACTCGATTAAGAAA	2628	AAGGTTTTTGTTATATAACG	968	AGTACCTAAGAACTTTGCCA	4395
ACTAAGCTACACCTACGGGG	2623	TCAGCTACCCACACTCGGAA	967	CATGGCCGAACCTAAACCCA	4395
TATATTGATACCATATAGAG	2623	CGAGACGTCTCCCCATACCG	967	CGATCGCGCACCCCTCTAAA	4394
GCTTTTTGTACCCAGCAGCA	2622	CATAGCTCTTCGACTACCAA	967	GGGACACACTTGAATTGCAA	4394
CATTGCCGTCCATTTAAAAA	2622	CTAATAAACTCACCTCCGCA	967	CAATATCCTAACATGCAACA	4394
CTTAGTCCTACCATACTCAG	2619	CCGGATACATCTCCGCCCGG	967	CAACCAACTTTGCCGCTGAA	4393
CGAAACACATTCATGTAACG	2611	GTGATGCCAAAGCCGATCGA	967	TAGGTCTACCCTCAACGCGA	4393
TGTGGCGTACTGCCATCAGA	2611	CAACCATTAGAGCATATGGA	967	CGTGCGCCCTGAGATTCAGA	4392
ACTCCACCCTGAATAAGGGA	2608	TTATCACCTACTACTACCGG	967	CCTAAGATCTTGGCTTGCCA	4392
TTGAGGGATGCCCATTTCCA	2608	TTTATCGGAGTATATCAGCA	967	AGACTCTACCCGCATTCCCA	4392
CGGATCGTTAGCTATTCACG	2607	TTACGCTACTCCACGAACCG	967	CGTACCCCCCACCAGTGAAG	4392
CAACGCCTTGCCATTAAAAG	2605	CCTCTATTTAGGGTATAGCG	967	CTGGTCCACACAAAAAACAA	4392
CTAAAATTAGGGCCTATCAA	2600	TTGCGTAACTTAAATAACCA	967	CTATTCGACCTGTTGATAAA	4391
CGGGCACTTCGGTTTAGGGA	2600	AGGATATGACGTGCTCCGCG	967	GGTCGGCCCTTTGTAACCGA	4390
CTATCATCCAACTTTTGCCA	2600	TGGGTTGATGGATCACCAAA	967	GGATGGCCTGGTACGCAAAA	4390
ATTGCCATTAAGAAATTAAA	2595	TTGTTGTGCCCGCCTCGCGG	967	GTACGTAACCAATTGCCCCA	4389
GCTAGCTGAGTCCAGAGGAG	2595	CAACATAGATAGCTGTCCGA	967	GATACAAACACGCTTCCGAG	4389
CTATTATATGACCCATCCGG	2592	CTAGATGTACGTCAGTCAAG	967	CGACAAGAATTACCAAGAGA	4389
ATGGCCGGCGTGTAGCCCGG	2587	GCTGCAAACGTCCTGTTCAA	967	GATGCCCCTAACCATTCGAA	4388
GAATAGCAAGTGCCAAGAAG	2587	TGGGTCTGACCAACGTTCCA	966	CAGCTAGTAAACCTATCGAA	4388
CCATATGGAAAAGCAAGACA	2585	CTTAACCATCGAGTATTGCA	966	TGAGTCTGACAAGCTTAAAG	4388
CGTTCTATAAGAGCTTAACG	2583	AAGTTAAAACCTACATGGAA	966	TAGATCCAACGCTTAACCAG	4387
AATAAGCCTCCCCAGCTGAG	2582	TCTAGAGCCACACCGAACAG	966	TCAGCGTCAGAGCATACCCG	4387
CTATAGACAGACCCTTGACA	2579	GCTGCGTCAGCTTCGCTGGA	966	TAGCCCTCCTCGCAGTAAGA	4387
CTTACAACTCTCACTACGAG	2579	GAGCCGCGATTCGCTCCGAA	966	CCTGGGTTCACACCATAACA	4387
GGACAAAGATGTTTTATGAG	2574	GCTGGTACCTCGCAGTGACG	966	CATTTAAGAATAATGACCCA	4386
ACTCAGACTATATAAACGGG	2574	GCTACTGACAGTGTATAACA	966	GGACAAACACCTGTTTACCG	4386
CCAAAAAATAGCATAAGCGG	2573	CTGAATCTACTGACTAACAG	966	CGGCTACCATGACCACGACA	4386
TCGCTCACTGTCCATCTAGG	2568	CCGGGTCCACTCAAGTGCGG	965	CCATATATTGCCTAATCAGG	4386
GAAGACTCCCCCTATATGCA	2565	TCGACGGGATGTACACAAAG	965	CGGGCTTTACGAGAACGAAG	4386
CCTAGAGCCTGTTTTCAGCA	2561	CCTCCGCATGTCACTAGCCG	965	AGACCTACAAGGACTTCAGG	4385
CCGGCTACCAGACAAAAGCA	2559	GCACAGTGCCGCGAATTCCA	965	GAACCTTGTAGGGCTATGGG	4385
CTGCCAAACTAATCAACACA	2558	CAAACCCTAACCGCGCTGGG	965	ACGCTTAGAGATTAATGCCA	4385
AAATCGCCCGGGAAACACCG	2555	CCGAGGCCTCCTATTCCCCA	965	TCGATTTAACCAACTCCAAG	4384
ACATGTAAATGCCTGTAGGA	2555	ATATAGGACGCGCAGTGAGA	965	CAAGTGCCAGAAATGCTAGA	4384
GCAGCATATCTGGAGAAAAA	2554	CGGTAGGCCACAGCTCCCAG	965	CATACAAGTCATGAGTTCGA	4384
CCAGAGGGCACTTAGCGACG	2554	CTATCAGCATCATCGTTACG	965	CATCCTCTATACATAACGAG	4384
CAATCTGTCTGGTATCCCCA	2552	CGAAAACAAGTATAAAGGAG	965	GCTTAATCTGCGACAACCAG	4384
CGGAGTGTAATTTATTCCAG	2550	CCAGGGCTTGAACATTTCCG	965	GGGCTAGCACTCCTTATACA	4384
CGGAGCCTATCTACTCTCGG	2548	TCTAAGTCTGAACCACGACA	965	TATGCTGGAATCAAGCTGGG	4383
TGGCATATCGACCCTTCGCA	2544	CTAGTTCGTTGTGTGCGAAA	965	CTAACCCACAAGGCACTAGA	4383
TGGTGCTAACCTTCATAGAG	2544	ACTTGCCACGGACAAATCCA	964	ATAGAGACTCCTACACAAAA	4383
CAAACATGCTCGTCACTGCA	2538	CCGGGTTAACACGCATGGAG	964	CGAGACTTACCAGTGTAGCA	4383
GTTGCGTATGCGGTGAGCGG	2536	CCGCGCAATTGTCAATCCCA	964	TCAAGAGGACGGTCGAAGGG	4382
CCTTAGGCAGGGCTTCTGGA	2532	ACGGACTTTACCCTAATAAG	964	AGTGCTGCTTTGAATCACCA	4382
GATTGGCAATCGTCACGCAA	2528	CATTGGCTATCTGTGTCGAA	964	CCGTCAAACTACTAACGACG	4382
CTTGTTTAATACTAACAACA	2523	CCGGACTACACGCCAACACA	964	CCGGTGGACTTACAACCACA	4381
CAAGGCGATCAGCTGACGAA	2521	CAGTCGCGTGCGCTGTCACA	964	AGAAATTTTCAAGTTTCCCA	4380
ACGTCTTGTACTAAACCAAG	2517	CGATCATGCTCACCTACAGG	964	CAAAGGGCCCGTCTGCCGAG	4380
GGACCGACTTTTCCTAGCGG	2517	ACGATAATCTCCATTAACAG	963	ACATCACATCAAAATCCCCA	4380
CCGTCCTACGCGCTTTTCGA	2513	ACGGGAGCTTAGTCACTCCG	963	CTTTGTCACTCGGTTCTAAA	4380
ACGGGCACTTGCATTTACGG	2512	CTATGCTGCCAAACGAACAG	963	CCACTCGATCATACGTGGGA	4380
AAGTTCCACCTTTAACTACG	2509	GAGGTCAACTCGAAGTCCGG	963	AAACGGAGTCGTGTAAACAG	4379
GCTCGAGAATGCTTATTCGG	2506	TAACACAACGGCCAATGCGA	963	TATCTGCATAGCTAAACGAG	4379
CGACAGCATTTCCCTCGAGG	2505	CTTGTCTAATATATGTCAAG	963	CTGTCATAACCTACAAACCG	4379
CCTCCCAGTAATACGTAGAG	2504	CCGGAGATAAATGTGAACAA	963	CTGTACCTAAAGTCTTTAAA	4378
GCAGTAAATGTGGTGAGAGG	2504	CAGGCTAAAATTACATAGAG	963	TAACGGCTCCACCAACGCGA	4378
CCTGGTAACAGCACTACCCG	2499	CAGTCGCTTCTATAACACCA	963	ATAATTTCCTTATAACCGCG	4377
CTGTCGGGTACAGTTTTAAG	2496	CTGCGGCACCCCTAGACAAA	963	CAGAAACTCCTAACATTCGG	4376
CTTTCCTACAAAAATATACA	2493	CTTCTCCTTAGGATATTGGA	963	ACATACACCAGTATATGGCA	4376
TTATCGAATCAACAAATACA	2490	ACAGGACGTTGTTAATACAA	963	GCGGGACCACAGTTAAAGCA	4376
CATTCCAGACAGCCGTTGGA	2487	CTACTTGCCTGCAAGACACA	963	CATACCCTATCCGATATACA	4376
CGTTACGGCTAAGTTCCACA	2476	CCTGGATTCGACAATAGAGG	962	CCTCTGCCCGAATCACACCG	4376
TTACTGGGAAACTAACAGCG	2476	ATGAGTATCCCACTTCCGCA	962	CGGTCTAACAGTAAGCTGAG	4376
TTTGGTTGTAAGACGCGCGG	2472	ATACGAGTCACACAAAACAA	962	GTACACCAACCGGTATACGG	4375
CGTGAGCATCGCAAATCAAG	2471	CGTGAAAATGGCTATCGAAG	962	CAGCCAATTACTCTACCACG	4375
TGAAACCGTCCTGCATCAAG	2471	AGGTGTCATACCGTACCCCG	962	GGGAGCCCTCAACTAACGGG	4375
ATTAAGGGTCACGTGCCAGG	2470	TCGGCCTATTATCTTCAAAG	962	CCGCGCCAAAGGTTACGAGA	4375
ACTGCGAATCTTCAGCCAGG	2467	CTGGAAACTTATGTACGGCA	962	CCAAGCCCCCAATAACGCAA	4375
CAATGTATAGTCTTTTGAAA	2467	CTACCCGTATGTCTATGCAA	962	TCACTAATTACTGCTCCCCA	4374
TCGGCGACACAGCTTACCAA	2466	CAGCGAGTTTTTCAATCCGA	962	CATGGGGTAAGTGCAAAACG	4374
CTAGGGATATCGGTACTGCG	2465	CTGAGGTGCGCAATGTCCCA	962	CCTCAAAACCGCAATCAAGA	4374
GTTATCAATTATAATCTGAA	2463	CTGCTATTACCCCAATCAGA	962	CTACACCCCTTGTCGTAACG	4374
GCTGCAGCCTAGCAAATCAA	2462	ATGCTGCACCGCACAAGAAG	962	GCGCTGTCACTGGTGTGGGA	4373
ACTGAGGGAACTGTTTTCAG	2459	CCTAACGACTGCCAATGAAA	961	TTGTGGGTCGGTAAAAGGCA	4372
CGACTTTCAAAATAAAAACA	2455	CCGGGACATCGAATATCACA	961	GGGAACTATTCTTTGCCGCG	4372
CAGTTCACCGTAACGCGAAA	2454	CGGGAACCCTTGCTAATCCA	961	CAGCCACGTGATATTATACA	4372
TTGTGCCTTTCACATTACAG	2449	CCGCGCTGAATAGTGCCAAA	961	CGTATCAAATGGCAATGCAG	4371
CTATGTTTCGCTACTATACG	2449	TGGAGTACAACCTAGCACCA	961	TTACGTACCCCTGTATACAG	4369
CGTGTAATATTCAAGACAAG	2445	CGGATCGTAACACTACAGGA	961	CCGTTACTCTTGGTGCACAA	4369
CTGAGAGATGACACAAACCG	2444	TCAGACAATACTCAGTCCAA	961	CCTTAGCTATACAAGCCCAG	4368
CGGCGGCCTTTGCTATCGAA	2440	TAGTGATGCACAGCAACCGG	961	CAGGGTCACGATTTTCTACG	4368
TAATGAACCCCAATACCGAA	2437	GTTCAGAACACTGTTATGAG	961	ACAGGCGCACACATTTGCGA	4368
ACTTGAGGTGACCTGCAGAG	2435	TAAGTGCTTAGTACATTAAG	961	CCAGGAAGTTAGTTGTCAAA	4366
CCAACCTGATTTTTTACCCG	2434	CCGAGACAATCCCAGTAAAA	961	CATAGTGTTAATCTTCAAGG	4366
TCAGGAATCCCCCAAATAAG	2430	CCGTGATGCCCATTACACAA	961	CGTTCCGTTGATGCTACCGG	4366
CTTCCTACCTTCATAATCGG	2427	CCAACATAACCAACGACGAG	961	CAAATCACACACAATACAGA	4366
CTGTTCACACTCACACCCCG	2423	CAAGTATTTGCCATTTAACA	960	CTAACCATTGTCCAATAGAA	4366
CAGTACGTCCGAACAATACG	2422	CCACGGTGTGGGACTTCACG	960	CTGAGCAAACTCCAGTCCAG	4366
CAAACTTTCGACGTAAAACA	2413	CCGGGAGGCTTCGTATTCCG	960	CAGCGTTGCACAAATTGGAG	4366
CTACATTTTACAACAAGGGA	2412	TGTCTAGGATCGATTACCGG	960	AAGGGTCACTGTTTGATAGA	4365
CTTATAACTAGCCAACTCCA	2411	CCGTGCCCTTGTAATCACAG	960	CCTGATGCCCACATGCTACG	4365
TCTGAGTTACCCGCTTCGGA	2408	ACGGTACACGCATTTATAAG	960	TATGATTGTCCATTTTTGCG	4365
CTTCTACCATTGGTTCCAGG	2406	CCACATGATTACATTAAACA	960	GAGACGAGTACTATGACGGA	4365
CTTCAGGTTTGTCAACACAG	2406	ATACGTTCATGCTCGCCACG	960	CGGGGTGCAGACGCAACACG	4365
GTTCCTTTAGCTCAATCCAG	2405	CTGCCTCTAGGCTTGCGCGG	960	GCTCATTCATGAGCTAAGGG	4365
CTACTCCTTGTTGAAACAAA	2405	CTATACATCAGCTAATGCCA	960	CCATAATATATGGTTCTAGA	4364
CGTGCGTACACACAGCAAGG	2404	ACAGACTTACCGCTACAGGA	959	GGTCGGGCTTAACTGAGGCA	4364
TGGCGGATATCATCATGAGA	2403	CTATAACTAGCACCACAACG	959	CCACCCCGTAATAATTTGAG	4364
AGATGAAGCTCTATACACCA	2403	CCTGTGGCCGTTCAAAGACG	959	CGTCAATGCCTGCATTTCCG	4364
CATCACTCCGGAACTCCCAA	2403	CAATGGCCCTAATCGACGAA	959	CCATATCGCAGGAATCCGAG	4364
GCGGGGCCCCTCCCTTCGGA	2400	TATCCAGTCCGCGAATCGGA	959	CATTGACTAACGGTTACACG	4364
CTTTGCTGTCCTTTACTCAA	2395	CAAATCCATTTGGTGCTAGG	959	CCTCCCAGTAATACGTAGAG	4363
CTAAGAAACGAACCATACAA	2395	CCACCGATTTATGTGTCGCA	959	CGTGACACCAATTATACCCA	4361
TATTGCCGATTTATTACAGG	2393	CGTTGCCTCCCAAATACACA	959	ACGGTCAATCGCGATCACAA	4361
TAATTCGCCGGTACTTCGAA	2392	TAGCACCGATTCCAACACAG	959	AAACATCCTATACTTCTGCA	4360
CCGTACAGCGACCATACAGG	2391	CAACGCATTTGATTTAACAG	959	TAGGTAGACACGTAGCAACA	4360
CTGCGTTCCCAAGCGTGAAA	2389	CCAATGGCACAGGTATGACG	959	GGAATCATCTAAGTAACACA	4360
CCGATATGCCGCACGAAAGG	2389	AGGCTACCTCGCATGTAACG	959	CAACTATCTCACCTGACGAA	4360
CTATCACCCGCGATGATCAA	2389	CCAAAAGTCACCAAGACCAG	959	CGGTCTACTGTCTCTTACGG	4359
TAACGGGGTTTTAAGTGCAG	2384	GCGATCGACTTGTAATCCGA	958	GGACAGGCTTAAGCTTAGCG	4359
GTAACCTGACGGCTATAGGG	2381	AAGTGGAACACCAATTGCAA	958	CTTCCACAACCAGCGTGGGG	4359
CAGCACGGCTACTTGTACGA	2380	CTAGAGACCATAGAGTGCGA	958	CCTGACCGAGTTATGTACAA	4359
CCTGCCGCTACACATTCCCA	2380	AAGCTACGCCCAAAATACCG	958	CTTCCGGACTCTATTCAGCG	4358
AAGCCTGTTACACCACCAGA	2378	ATATGCTAAGATCTTCCCCG	958	AGAGCGATCAATCCTATCCG	4358
TAAATCGGCACTATTCCCAG	2375	CCGTATAGTGATATAATACG	958	AGACCCTACTGTGAGTAAGG	4358
CTACACTCATGAACGCCACA	2374	CCAGCCCAAATTTCACACGA	958	CCACCCATCGGTAAACCCGA	4358
TAATTCTATACCGCAACCCA	2371	CCATATATAAACTTAATCGG	958	GATCCGCATACTGAAACGGA	4358
CTGCTCGATAGTGAGCCCAA	2369	CTATCTGCTAACGTTAAACG	958	CCTTCTGTACATGAAAGGGA	4357
CTTAGCCCAGTTGCTAGACG	2368	TGAAACCGTCCTGCATCAAG	958	CTTCGAGACAACAATCTCCA	4357
ATTGCTGCTCAACATCCGAA	2365	CCTACTTTAGACCAGAGACA	958	ACACATGTCTAATTACAACA	4357
TCTATATTCCATCCTTTACA	2364	ATTGACATCTATTCGTCAGG	958	AATGCATCAGCGCAGCACAG	4357
ACGGGGACACGCCTGAGGAA	2362	CTAGCTCGCGCCCATAAAGG	958	GTGTTTTATGGACCATGCAG	4357
GCGAGAGCCATCACGTCAGG	2362	CATACGTTTCAAGTACAAAA	958	CGGCCGACACCCGAGTCCCA	4356
CTTTGACAACTCGAGCGCCG	2359	GCACCTATCATCGCATTCGA	958	CTAGCACATAGACTAAGGAG	4356
ATATATTTTAGACAGCGAGG	2358	CCGCGCCCCTATTAGTGGGA	958	CTGATATTATGTACGTGCAG	4356
CCACCTATTGTCATGAAGAG	2356	CAAAGACCAGGTAATTAGAA	958	GGGATGCCAGCGGAACTGCA	4356
TGGGGAGCCCTCTATCCAGA	2352	CCAGCTCGAGTTCTGATGAG	958	CCTTGTCAATTCACTCAAGA	4356
TTTCACCGAAACCCAAGGAA	2350	ACACTGGTCCCGGTTAAACG	958	CCTTCGTGATACGAGTTGCA	4355
CTAACTCGCGGGGCACAAGG	2346	AATGCACGTAACATGTGGGA	957	GCGGCTTTACCCTTACGAAA	4355
CATCTCCCCACGTCACAAGA	2346	CCATGACTAGGAACTTTAGG	957	CATCTGAATGTATTGCCAAA	4355
AGTCAACTCACAGTGTAACA	2344	ACTGTACCCCAGACTTCAGA	957	CTATAGACACTTACTCCACG	4355
GAATTTGATTATACATGCAA	2343	CATGTACCTGGATATCCCGA	957	TCTTAATACAGATTTCCAAG	4354
CAGGGCCAAACCGTTTAAAA	2343	CTGTACTTTGACTCATACCG	957	CTTACCATTTAATAGCGAGA	4353
GCTATGTACCAAACTATGAG	2338	GTACCCCGTGATATATGCGA	957	CTTTCCTGCGAGTAATCACG	4353
TCAGGGTGCTCGTTGTCGGG	2337	CTATCCGTCTAGTAACCCCG	957	CTGGATTTACTATAACACAA	4353
CCACGGAGAGCCGATAGCCA	2332	CAGATGCCTAAGCTTCAGAG	957	CCACCAGGAAACAAGCCCAA	4353
CGTCGCAAACAACAGAAGGG	2332	CCAAAGCATCATACATAAGA	957	TGTGCCCTCTCGAAACCAGG	4352
CATGCCGCTGGATCACAGAA	2330	CATCATACAAGTCAGTTGAA	957	GGGACCCTACATGAACCCAA	4351
AAGCAAACTTGAGCAATCAG	2330	GCACCTGCTGGCCAACTGAA	957	GCTCCTCCTTATGTTACAAG	4351
CTAACACACTAAGTGCGAGG	2328	CGTTAATGTATCCCTTCCCG	957	CCTAACTACCGTCATCCAGA	4351
CAACTCCAAATTGTGCTCAG	2325	CTTGTGTACACATATCCGAA	957	ATTTGGCCTCTACCAATAGA	4351
CATACTATCAAGAAAATGGG	2324	CATTAATGCGACCATCGCCA	957	CCTTACACAGGGCTACCGCG	4351
GCGACTACCAGGCCAAAGCG	2319	AATATCTTTGTATCATACGG	957	CAGTGACCAACCATTCGCCA	4350
AAAAGCGCATCGCAACCCGG	2316	CCGACGTGTACTACAATAGA	957	GTACAGGTATATGTGAAGAA	4350
GTTACGTGCCAAGTTTACGA	2315	CGAATTAGTCCAGCTACCGG	956	CAACCAAGTAATATGTAGCA	4350
CTGACATACCAACTATACAA	2314	CGATATTGTGGTACGTCAAA	956	CAAACAGATCGACCGCCGGG	4349
GTGACGACAATGGTACGCAA	2313	CTGTGTTACTGGTTGTCAAG	956	AGAAACACACAGGCGAGGGA	4349
CCGGTAGCTTCAATGTCGAG	2313	GTTTGCCTACGACTGTCCAA	956	ACTGCATCTGCCCTTCACGG	4349
TGTAGGCGCCTTGAGCCCGG	2312	CCTGATATATCAAAATAAAG	956	TGGTTGCTATTTACGACACG	4349
CCTAAAGGTGATACACCGCG	2306	CTGTGCTGCTCTCAATGCGG	956	CGATTAACCTGGACGCCCCA	4349
GTAGACTCCACACTTACGGA	2306	CCTTTTGAATCAATATGCAG	956	AGATCAACCCTGACTACAAG	4348
CTGGCGTATCCACTGTAGCA	2306	CTATTAACTAACCTTTGCCA	956	CCTAGACGTTTTCAGACCCG	4348
CCACGAATCCGGCCAACCAG	2304	GGTCAATCCGTCTAACCGAG	956	CCAAAGCAAAGTGCATTGAG	4348
CCTGACTGTCCCCTACCAAA	2302	ACACCAGGATCTGTTCACGA	956	CCGCCCCACAAATCAAGGCA	4348
CGAACTACATCCTAACCGAG	2299	TCATAAGAACTTATACAGAG	956	CCTATTAGCCGTGCAACGAG	4347
CCGCCGCTACCTTCTCCGGG	2298	GGGCTCTATCCCCAGACCAA	956	CGATGCATCACAACTTCCCA	4347
CGGTTCCCTAGCGCACTAAG	2298	CGTAGGGATCCGCTATACAG	955	TGGTCTGTAGCAATGACCCG	4347
CCAACAAACCACCTTCACGG	2297	CTTCTGGAATTGACGCTAGG	955	CCATCCACAGGTTCTACAAA	4346
CTTTGACCACATTATTAACA	2296	CGTACTACCATAAAGCTGCG	955	GCATAATTTACACAAACAGG	4346
CCTCACGAAAACCAGCCAAA	2295	CCATCCGGCTATACTAACCG	955	CGAATACCCCACGCTCCAAA	4346
TGAAGTGCAACTGCATGACA	2293	CGGTCACTTGTTCATCAGAG	955	CGACATTTCTCTTATTTGGG	4346
TTTGCATGTTTGGAGCTCAA	2291	TAGGAACCACTAATTATCAG	955	CGGGAGAACACTCAAAAAGA	4346
TCATTGATCAGAATACAGGA	2285	GGACACAACCGTTTTCACAA	955	GCTTAGGATAGACATCTGGG	4345
CATGTCGCCACGTTGCACCA	2284	CCAATGCTACTATCATCAAA	955	TAAATCTATTGGCTAAGAAG	4345
GGACAGACACTACTAACAAG	2283	CTGAACGACGGTATGCAGCA	955	CATATTAACTCGAATAGACG	4345
GTTCCGGGAAACCCTCTAAA	2282	ACATGGCAAGTGGTGACGGA	955	CCTCCCTGTACCCTTTACAG	4345
GAACCTAGCATTCATTTGAA	2281	TGTGGGCTTATAATGATACA	955	CTGTCCCACTATCTTAAAAG	4344
CAACCCCACATTGTAACCGG	2281	CTTGAGCCTACGATACAAAG	955	CTGTACGGTACTACAACGAG	4344
CATGAGAGTAGAATTCTGAA	2279	CTTCACCAATCTGAGACGAG	954	CCATGGGTCCGGACGCACAA	4344
TAACGGTATCTTAAGCTGAA	2278	CGGCGCCTCAAAGCTCCGGA	954	CCTTGGTGCCCTAATTTAGG	4344
CTTCTCATACGCCTTTGCAG	2278	CGTGTCACCGCCCTGAAGCG	954	CGTTGTGGCAAATCTACCAA	4343
ACTATCCCCACCCCTCCACG	2275	CCGTACCATCTGTAAACGGA	954	CCGTATAACTCCCTAACCCA	4343
CGGCACTTTGGGAAAACGAG	2274	CCTAGTGTCCCAGCTCAGCG	954	ATGGACCATCACCAATAAAA	4343
CCACACCAAGTCTAGAAAAG	2273	CTAGTCTTACTCTTGAGCAA	954	CCTAATACCACAACATACGG	4343
CTTTGAGACAAGCTATTACG	2273	CCGTTGTACAATGCAAAACA	954	CATCAGGTAACAAAGTTCCG	4343
CCTTCACGACCTTAACTACA	2272	CCGGGTTCCCGTGCTACCCA	954	AATGGGTGATTGGTTTCAAA	4343
GTTTACACCTGCGCTAACAG	2271	CAAGTCGTTCATCCAAAAGA	954	CCGTCTATTCCCGCATCAAG	4342
CCTCCCTCTTTAAAGTGGCA	2270	AGTTACACCCTCCAGTACCG	954	CCAAGGAATTAACTAATGAG	4342
CAGAACGTAGGCATTCCCAG	2267	AAAGCGCGAAGTCTAACAGG	954	GCGGGGTAAGTCCAGTAGAG	4342
CCATAGTCCCTGAAGCAGAG	2266	CGTCGCCGCAAAACGATCAA	954	CGAGATCGCACTTAACACAA	4342
TTTTCCACCGCGGAGTTAAA	2263	CAATGTATTACACCTACAGA	954	CGACCTTCTCTGGATCGGGG	4342
CCATCCAGTTAGCCACAGGA	2263	CAATAGCCCCGCCTTTCGGG	953	AATATTTAAACTCAGACCGG	4340
CTTCAAGCACCTCTACTGCA	2263	AGGGTCGCCCCTGAGTGAAG	953	GCACTTCTACCAAATCACAA	4340
TCGACGATACGAACACTGAG	2262	TGGCGGATCAGTGCTCTGAA	953	TAAATACTTTGTGAGAAAGA	4340
TTGGGCTCTATGATATACAG	2261	CGGGATCTAGCTTAGCAACA	953	CCTACGGGTCTCACGCCAGG	4340
ACATGTCAATCCAAATACAG	2259	CGATAACATGGCCATCTACA	953	CTGGCCCGATGAAAACCCCA	4339
CCGAATATCAATTTTAAACA	2255	CTGCTCGATAGTGAGCCCAA	953	CTGGATGGTCTATAGAGCCA	4339
AATAATACACGATTGTTGCA	2254	ACAGCTCCCGTAGCTACACA	953	CATACTTTATTTCAATTACG	4339
CGTATGGACTAACATACCGA	2253	GGATCTCCATACGTGACGGA	953	TGTTGTGACGCAAAGACACA	4339
CCAACTAAAAACGTACTCGG	2253	TTATGCCGCGCGAAACCACG	953	AATATATGACCAGAGAGACG	4339
GATCCTTAAAGCCATCCGCA	2251	TAGGTCTTAAATGTACGACG	953	CTTGACTATCGCCTTCTAAA	4338
CATTTCCTCCAATCACCAGA	2249	CCTACCGCTGAAGCTTGCCG	953	AGAGCATTAACTACTAGAAA	4337
CCTCCCGGTAATTTTAGACA	2249	ACTTGTGCCACGACTCGCGA	953	ATTCTTTTACGGCCGACGCA	4337
CTAGCGAAACATTATTCGAG	2248	CAGGCATGAGTGACATCACA	953	CTGTGGATTAAGGATTTAGG	4337
CTGTTTTAAAAGCTGTAACA	2245	CAGGGCCCACGTCCGAGCCG	953	CATGAACGCCGCTCGTGCAG	4337
TAAAGACCCATACAACCCGG	2244	CCTACGGTACCATCAAAGGG	953	CGTCTCACTGACGTGTCACG	4337
TCTCGTGCTGTAGCTAACGA	2244	TAACTAAATATTTAGCCCAG	952	CCACCCAAATTAACTCCCAG	4337
AAATTTGGCGACATTCCGCG	2235	CTGCCCTCTGCAATGAAACG	952	TCGTACGTACACGCGAGGCA	4337
CGTTGCTATGGCCCTCCCGA	2234	ATGGGAACAAACAAGTGCGA	952	TATCCTGATCTTGAGACCCA	4336
CTGGAACTTGGAGTATTGAA	2231	ATTGCATACCTTAAACACGG	952	ACACGGCCACTTCTTTAACG	4336
CCTCAATATCTGCCATGAAG	2227	CCTTAACGCGTAGTACCCGA	952	CTAGTACCCATAGCGACCAA	4336
TAGCCCTCCTCGCAGTAAGA	2226	ATACTAAGCCCCTCTTTACG	952	CAGATATCCAGTTCACACCG	4336
GAACGACCAGCAGCATGGAG	2224	GGATGACTTCCCTAAAGCCA	952	CGACATCATGCTTTAATACA	4336
CAGTATAACCTAGTGAACGG	2223	CGGGACGTTTCAATATTGCA	952	ACACATGCCACTTCTATACA	4335
ATGGACCTCCGCATTCCCAG	2221	CTTGCCGATTATGCAATAGG	952	ACTACCCTTTAAGAGTTCCA	4335
ATTAACAATATCCAACACAA	2218	AGTCTGAGCCAATCAACCCA	952	AATACCCATCCGTATACCGA	4334
TCTCGGATAAGGTTGATAAA	2218	AAAATGGCATGCCATTAGAA	952	TCATTTGGACAGCCACGGGA	4334
CAGCCCGGCTCAGCTATAAA	2211	AATCCCTTACTGATGCCGCG	952	CATACTAGAAGACATATAGG	4334
CCATCTCCAACCTCTAGACG	2210	CCGGTACCAAGCCCATCCCG	952	CCGCTTTCACTAGTTCACAG	4333
CCTTTAGCCATTCTGCCCGG	2210	CGGGTTACCCTTCCACACAG	951	GCATGTCACTTATTATGCAA	4333
ATTCCCCTTATGTCTATAGG	2198	GCGAAGTTTAACAAGCCAAA	951	CTTTACATTCAACTTTGAAA	4333
TATTTCACCCCCAAACCCCG	2197	CAACTGCCTGACACTTTCCA	951	TTTATGCATAGAAAGCCGAG	4333
CTGAGGTAAGAAAATCAAAG	2193	CGAGGCGCTGCTACGTCGCG	951	CAAGCAATTCCGACGTACAG	4332
CCGTGCTTCTCTATTACGAG	2193	CATAGGTGCGGAACACCGGG	951	AGGAATGCCAACGATTTGGA	4332
ACTCGACCTTATCAATCAGA	2191	CCTCCTACACCGGCGTCGCA	951	CTTTACTCATTACCGAGCCA	4332
TCTCCCAATACTAATATAGA	2188	ACTCCCCTAAACCAACGCCA	951	TGTAAACATGGTCTATTCAG	4331
CCATGTATTCAGCCACAGCA	2186	TAAGATTGAGTTATGACCCA	951	CCGTAACAAACCTCGCAAGG	4331
TCTGGGACTCGTTTATTCGG	2179	GTGCCTCGATTAACATCCGG	951	CGACGTAATATCGTGATAGG	4330
ACAACTTCTGTTCCGATACG	2178	TTACCAAATTGCAATATCAA	951	GCACTGCATTTGTTTACGAG	4330
TAAGCGAGTGCCTCGCGCCA	2178	CATCCATCACTCCCGACGCA	951	AGTGCGGGCATACAGACCCA	4330
CAAGGATTACACCTATAAGA	2178	CAGTGCAACTGTGATTACCA	951	CATTAAAGAGCCCTATCACG	4330
GCGCCGTGTCGCGCACACAA	2176	CCTCACTTCCTGCCGATACG	951	CGAGCCACCGCCTTATAACG	4329
CTAGCCAACGTCAAGCCGCA	2173	CTACGGGACGTCCCGCGACG	951	CCAATCAGTGCAACGTACGG	4329
CGTGCCTGAGACAAACCCAA	2172	CATAGGACATCTACTCAACG	951	CTACACAGCCAGCCGCCCAA	4329
GCGGAACCAATTAAGCGAAA	2170	CGGCCGCCTTCTGTTACCAA	951	CTACCACGCCGGCTTCACCA	4329
CCAGTCTGATTATAGAGAAG	2162	ACTGTCGCACGTGCGCTCCG	951	CTGCGAGTCTGACCAAAGAG	4328
GGGCCCACCCATTCACCACA	2162	TGGACGGATGACAAGTAAAA	951	CCAAATTCAGCTCCTAAAGA	4328
CTACATAATGCAATACAAGA	2158	CCGTGCTCATCGGAGCTACA	950	CCAGGCAGAAGCCCTTTGCA	4328
ACTATTAGATCCCCAACAGA	2157	GTGTAGCCTAACGATTAGGA	950	GGACTTCAACCGGCGCCAGA	4328
CTATCATTTGTACCTTTAAG	2157	CGTGTCTGACTTCCTTACAA	950	CCTGTTAAATTTGTACGAGA	4328
GTAGGCCGATCAGTGAACAG	2156	CGGGTCACATGTCATACACG	950	GCGAGGAATGGTAATACAGA	4328
CCATAAACATCATCATAGAA	2154	CGAGATCATTTACATAAGAA	950	ACGTCTTGTACTAAACCAAG	4326
ATGTACGGAAACCTTCCACA	2152	CTTACAGACACTTAGCACCG	950	CTGGCGACACTATAACTCCA	4325
GCTCCCTATTCATCGTGACG	2150	TCACTCGGTTTAACAACACA	950	CAGTTTTCCGATGCGTGAAA	4324
CCGATCACCCAGGTTACGAA	2150	CCGTAAGCCAACCTAACCCA	950	ACGACGTAAAGAGTAACAGG	4324
CGGCGGACTTGGCTGACGAA	2147	CATTTAGGTACGGTACCACA	950	CCGGTCACTTGGCAGAGAAA	4324
AAGCCCAATCCTCAACCGAG	2141	CTAGACCGTCCGTAATAACG	950	TGGGTTAGTTACCTATCGGA	4323
GTAGGCACAAGGGTGTTCGG	2137	CAAGCGCTCCAGCTGTACCA	950	CCTGCACCTCCGTAGCCCAA	4323
CATTTACTTTGAAATCCAGA	2137	TTAGACCGTATTCAACGACG	950	CAAAAAACATCTTCGACGAA	4323
CATCCTGCCTACTATTGCGA	2136	AAGGCTTAACTTGCGAACCG	950	CGGACTCTCCTGCTAATAAA	4323
CTTACAGACACTTAGCACCG	2135	CCACCCAACTGTGATCCAAG	950	AATTGGTTACTCTTTCCCGG	4322
GGACGTGTCTACCTGAGCGG	2135	CAGTTACCCCTCTTGTTAAG	950	CCATGGACATGCCTATTAGG	4322
TCTTTGCAATATTCAAAGAG	2133	AGTTCACCCGCAGTAACCGA	950	GAGGTGCCCTACATGTAGAA	4322
AGAGATGCTAACATGTGAAG	2132	CCAGGATGCCCTGTTCTAAA	950	CCAAAAACTCCTCCAATACA	4322
CGGAGCATCTGTCAGCGCAA	2132	CTAAGCGTAACAGTGAAAAA	950	AAAAAAAACGAACTTAGGCG	4322
CCGGTTCAAAATAAATTCAA	2132	AGGCTTTCATTGATGAAGCA	950	CATACCACATTCCTATCACG	4321
TGAGTTATCGTGCTATTCAA	2131	CCAGACCGTACTGAACTCCG	949	CGTGTCCACAGGTAGTTAAA	4321
CGATCCCGTTTCGATCACGG	2131	CGACACCATCGGACACACCA	949	TCAGCTGCCCACGAGTAAAA	4321
CAATACTTAGAATATACACA	2129	CAGCTGGCAAACCATAAAAA	949	CATTTACTACCCCCTTTAGG	4321
CCTATCCACTTGTCATAACA	2129	TAAGTCGGCACGGTACTCAG	949	CCTATTAATCACTAATTCCA	4321
ATAGAGCAAACAGTTAGGAG	2129	CAGCTACATCCCAAGTAACG	949	CCTTCTACATGGCAATTCCG	4321
GCTGACCTCGTCGATCTCAG	2128	TTGTGTCTAACACCGTACAG	949	CGTATAACCACTACGATACA	4321
CTGCCTGTTTACGCAAGGAG	2126	CGGTCACTACCCTCTCAACA	949	CGAGGAACCACCCTTACACG	4321
CCAAGTGATCGCATTTAGGG	2126	ACAGTAAGTTGAACAATCCG	949	TCTCGATTCAGATAATTACA	4321
CGTCCAGCATCGATATGCCG	2126	TGGGTAACAGGTCCATCGAG	949	ATTGTTTACTTTACTCTGGA	4320
AGGGTGTCAGCCGATTACCG	2125	CTACACTCATGAACGCCACA	949	CTAGTGGGTCTCAATAGAAA	4320
CTGCGGTCTGGAAAACCCGG	2124	ACTCACCATGGATTACTAGA	949	CCAACCACCCAGTTGAACAG	4320
CGTCGCCAACCTGCACCCAG	2122	CAGTTCGTATATCAATAGGG	949	TGGCCTTCACAACCAAAGCA	4320
GCATGGGTATCCATGCGCAA	2122	TGAAGGTACGTTCCATTGCG	949	CGTAAGGGACCGTAATACCG	4319
TTAGAATCTATCCCACCCCG	2120	CCGAGGACTACTCATTAGCA	948	GAAGGGAATCAATATACAGA	4318
AGGTTAATAGGATTGATGAG	2116	AAGCGGGGTTGATAAAACAG	948	ACATGGTGCACCCTAAACAA	4317
GCACTCCACAGGCTAAAAAG	2114	CTAGCTACCACGATGTTAGA	948	TCAGGGCTCGATTTGTCAAA	4317
CGTGTCATCAAGTCAATCAA	2113	AATGTAGACCCCTTACGCCG	948	CAACCAATTTGAAAGATCCA	4317
TCTACCACCACAAATATCCA	2113	CAGACGATCGCAATTAGGAA	948	CTTTGGGGCTCTGTATTCGG	4316
CTATTTAACGAAATGCGACG	2111	TTGCCATGCGTCGCAAGAAG	948	AAGATACTAGCCACTTAAAG	4316
TGAGATTAAGTAGTGCGGGA	2108	CATACATTATGGGCATGACA	948	CGTTCGAGCTATCTTTACCG	4316
GCTAGTAGTGACTAACCCAG	2107	CTACCACGCCCACCATTCAA	948	ACTATCGAACATTCATTAAA	4316
GGGCACCCACTCAAATTACA	2105	GCTGAGATAATCATGACCAG	948	CGGACCATTTTTCCGTACCA	4316
CTTGCCATCCCGCATCCCGG	2103	GCTGTCCGAGGGCTTCACGA	948	CATATTTCAACTCCACAAGG	4316
CCATCCAACACGCATCCAAA	2100	CTGACTCTACCTTAACCGGG	948	CTAGCCACAGTCTAGAGACA	4315
CATGTCGGCGTATATCACCG	2099	GCAACTCTCGCTCAGTCGAA	948	TCTCGGAATAGTTAACCAGA	4315
TCATGGTTACTTGCTTAACA	2099	TAGGATTGCAAGGCTCCCCA	948	ACTGATACTGTCCCAAGCGA	4315
AGGTTTCCCTGTGCGTAAAA	2098	CCGGAACGTGCTTCTATAAG	948	CTTCAGTGTATTATTACCGA	4315
CCTATCGTTCGAGCGTAGCA	2097	CGTGTCCCAGCACTAAGCCG	948	ATTGCTTCCACGCAAACAGG	4315
GAACGGGTCGCAATGTGACG	2096	CATGGGTCACACTATCCGGG	948	TAAACACTCTGACCTCGCCA	4315
CAGAAGCGTCACATGCTGGA	2096	TTTGCATGTTTGGAGCTCAA	948	TTGATCAATCGAATGAGAAA	4314
CCAGTTCAACCGCCGTTCCG	2095	CCACACGGCTCCAAGCCCAA	947	TGAACAGTCGGCGAGTCAGG	4314
CTGCACAATTCTACAACCAA	2094	CAATTTCTCGAACCACAGAA	947	TCGTGACGTCGAATGCTAAA	4314
CCTGCCGTACTCAAAAAGGA	2094	TCACTGGCTGTACAATGGAA	947	CCGCATTTTACTCAGTGCAG	4314
GCAATCCGACTTTAGTCAGG	2087	CTGGCGAACTTAGCGCTCGG	947	ATGACGCCTACCTAGCAACA	4314
CTTTGGGAAATAAAGCAAAA	2084	GAGGGATACTTGACGTCCGA	947	ATGTGCCTAACGAATCACGA	4314
CAAGTGTATCTTTTTCAGCG	2084	CTTGGTGGAACCCCATCAGG	947	GTTCCGAGCATGCTGCAAAG	4314
CTATGCGATGAATTGACGAA	2083	CAACATCCCGCCTTGTCGCG	947	CGTTTGCTATCACATTGGCG	4312
AATCGCCACGTCTAGCGGAG	2082	CTTAGTCCCATCTAAACGAG	947	GAAAGTCATGACAATAACAA	4312
CCGGCCACTTGCCTGACAAA	2081	CAGTCTATTAGCCTGATAAG	947	TCGCGCGGAACAGAATAACA	4312
AAATAGAGCCTCATTAGGCA	2075	CAACCGACTCATTATACGCA	947	CGTCCTATCACGTAGATGAG	4312
CTATCAGGAGGGAAAAGACG	2072	CCACTTACTTTTCCTCACAG	947	ACACATGCAGGGACGACGAA	4312
CTTCTCCTCCGCAATCTCGA	2068	CAAGTAGGACGGTCGATAGA	947	TATTCGCAATGCATACGAGG	4312
ACATCCGGTGCTCAACGGAA	2065	ATAACGGAATTACCTCAGAG	947	CCGGATCTTAATACACAGGG	4311
TCTCAACATCCATAGAGGCA	2064	ACGCGTTTTGTAGTGTACGA	947	CATGTCCCCCCCCATCCACG	4311
AAAACCGGCACCAATCGCCA	2063	CGGTCGACCATAGAGAGGAG	947	GTTGCGGTAGACCCTCGAAA	4310
CATGTAACTTGACATCGAAA	2063	CCAAGACGACCGTAACACGG	947	CTGCAGTTCGGTAAGAAAGG	4309
TCGGCGATCCGTCAGCCCGG	2063	CTTGTATGTGGTCTGCGACG	947	ATGTCAGGCGGTCCAAGCAA	4309
GCTGTAGATAAGCAACAGGG	2057	CCGGCGTGCATCATTCCAGG	947	CTTAGGCACTATCCGCCACA	4308
CTGTTTCCATCGTTACTACG	2056	CATCCAGATGCTGTTACAAA	946	CTACAGTGAACTCCGTTACA	4308
CAGAGTCCCGCGCTATAAGA	2054	CTGGTACACCAATATCGAGG	946	ACGCCGCTTCTACCAAGACG	4308
AAGCTACTCCGATCTCTCAG	2052	ATGGGGCTTGTCGCAACGGG	946	CATAGATTCCTTTATTGCCA	4308
CTTCCCATACTGAATAGAGG	2052	CTTAGGTACCCCACTACAGG	946	CTAACATTTACCGTTCTACA	4308
GCAACTCTAAAAATTTACCG	2052	TGGAGGATCCACAATCGGAG	946	TAGCCTCTACCTACACGCCA	4307
CCACACATTTATATTTTGCG	2052	GCTACGGCTCCATAGTAACG	946	ACACGGAACACGAATCGAGG	4307
CCTTGATCTACTTAGCCCGA	2048	CTACCCACCTCAACACCGAA	946	TAACGTTAACCAACTACACA	4307
CAAAGGGCCCGTCTGCCGAG	2044	AGGAGCTAAGACATGCAGCA	946	ACACAGTCATGCTCTCAGGA	4306
CTGACGGATTCCAAACCAGA	2043	GCTGGCCTTACCCCACGCAA	946	ACAATTCACGGTAATTGGCA	4306
CGTTTGCCTGCCACATCGCA	2043	GCGACAGTCTGGCATCTACG	946	ATGCACTACATAAAGTACGA	4306
CATGCTGTCACGAATCGACG	2042	ACGTGGATATTTCATTGGGA	946	CTACATTCACGTCCTATCCA	4306
CGAAACGACTGAATAAACGG	2038	CAAGGGTCAAATTCAACCAA	946	ACAGCACTCACCGAACTGAA	4305
CTAGCCCTCTCGCCGCGCAG	2036	ACTGACCTAGTTATGCTGCA	946	CTGTCCGCCGACACGCTAAA	4305
ATTCTACATCGCTCACCAGG	2036	GCATGTTTACTAATAACGGA	946	AAACTAAAATACTCATCACG	4304
CCTTGTCCTACCATACTGGG	2032	TCGTTGCGCTTCTATCACAA	946	TAAGATCTAAACTAAACAAG	4304
GATATATTCCAGTCATTCAA	2031	CGGTGCGTCAATAAGACCAG	946	CTTCTAGAAAAGATTCTCCA	4304
TTTGTACATTGCCTTTGCCA	2030	GCGCCGCTTTACTCAACGCA	946	CTACCAATTTGTTTACCGCA	4303
GCGGTGCCATCAACGCGCGA	2029	ACAAGTCAAGGCGAATACAG	945	CAGTGCTAAACCACTCGACA	4303
TTAGTGCCTATGTATTGACA	2029	CATTTCAAAGCGATTCCAAG	945	CGTAGTTAACACATTATAAA	4302
CTAACAGGACAAAATCTCCG	2026	CTAGCCCCTGTTACTTCGGA	945	CAGAGCGCTCTCCTTCGGGA	4301
TCGTGCTTAGAGATGCCCGA	2025	CGTTGATAATGAACACGCAA	945	CTGAGATAATCTGAATGGGA	4301
AGTTAATGATTACTTCTCAG	2025	CAAACTAGAAGACAAACGAG	945	CTTGACAATGACTTACGACG	4301
TAGTTGCGCGCCCTTTTGGA	2022	AGAATTGTAATGCCATACAA	945	CCTGGCCATCCAGTTTCGGG	4301
CTACTCGAACGCTATCCGGA	2021	CCATCCGGACGACAAATAAG	945	CTTAATTGCGGTCCGCACCA	4301
CAGCTGTCAAGTTAGTCGAA	2019	CTGAAAGATTCGACTAGCAA	945	CTGAGTAGACCATCTATAAA	4301
GCGTTTGCTGGTGCTAACAG	2019	GCTACGGATTTCCAATAAAG	945	GTGCAGCAACTTTCTTCAAA	4301
CGACGACGAATCTTTTGCAG	2018	CGTCGATCAGAAAAGCTAGA	945	CTTTGCTCTCGCCTTTGACA	4301
GCGTGCTTAACACAAACACA	2018	CCAAATGAAATGACTTAGGG	945	ACTGCTTGCCGGGAAAGAAA	4300
CGACTCAATGTCAAATCAAA	2017	CAAGGCACATTCATATAGAA	945	ACGTCACATTGGCTTACAGA	4300
TCGGGCTCAGCCATGTAGAG	2015	CGTTTTCTAGATAATCAAGG	945	ATTTGGCGATACGATCTAAA	4300
CATAAGAACACCAATTCACA	2015	TCGCTACGTAAATTTCTACA	945	CTGCAGGCTTCAAAGCGACA	4300
ATGCCCGCCTTCGATAACGG	2015	GGGCCCCATCACTAACAACA	945	CCAGTCCAATAGCCGCAAAA	4299
CTATCCCAAGTTGATCTACG	2013	CAGCCAGGTATGCCGCAGGG	945	TCAGGGAAAAAGTTGTTAAA	4299
TCGGAACACGACACTCTGAG	2013	CAACGCTTTGTCTTTAGCCA	945	AGTAGGCACCGTGTTCAGAA	4299
GCGGTTTGCAAATTGTGAGG	2011	CTGCCTTGTACTACGACGAG	945	CCGGGACACTGCCCTACACA	4299
CTGTGTGAATTAATATCAGG	2010	CAAAACAACGGCAAACGACA	945	CGTTCCCCTAAAAAGCACAA	4299
TATTCCGACCTTCCGCTAGG	2009	TCAGGGTCTATCTTGCAGAA	945	CGGTAAAGCCCCGTAACCCG	4299
CAATCATCCGCATATCGGAA	2009	CATGTAACTTCATAGCAAGA	944	CCATTACCACGTCAATGAAG	4299
GGGCTGTCAAGCTAGCTCAG	2009	ACAGGGGCCCAAACAAGCAG	944	GGGAAACAATCTGCTCGGGG	4299
CATTGCCACCGCTCACCAGA	2007	TGACGGTTAAGATCGAACCG	944	TAACGGCTTAAATCATCAGA	4298
CGGACGAATAATTCGCGAAG	2005	GCGAGATCCGAGCATCTAAG	944	TGGGCAACCTCCGCTACCCA	4298
CGTGGTAAAAAACAGTCAAG	2005	CTTGTCTATACACCGTTACA	944	TCTTAGACTTCCTATTCAGG	4298
AAACACTCACCTGAAATGCA	2005	GTAGTTGCAATATAGCCAAA	944	TCTGTTTCTTCTTCGTCCAG	4298
CAACGGGATCGCTCGATCAG	2003	CAGGAGAGCCGTTTGCCCAA	944	CTGTGAGCACGGGAATAAAA	4298
TTGGTAATACCCCTTTGGGG	1999	TATCCTGACCCAACTACCGA	944	CTGAACATTTCCGCGTAAGA	4298
ACACATCGCCTAGTAATCGG	1997	GGAGTTCTAGGCATAACCAA	944	CGACTATTCCTTCCATCGCA	4298
AGTCACGTATGTGCGCCCGA	1994	GATGTTCTTTCCGTGTGCAG	944	CTAACGAGCTCTCTATGCGG	4297
CCAACAGACGTTAAGCAACA	1992	CTAACCGACATTTATTACCA	944	CAGATAGCCCCTTTGACAGG	4297
AGACAATATTCAATTCTCGA	1991	CTAAGACACTAAGTGACACA	944	ACAAAACACACTACGTTCGG	4297
CCAGTACACGAGTTGCTAGG	1990	CATAACGTCAACTAAATGAA	944	GCATCAATAGGATTAACAAG	4297
CCAAAATACCCTCAACTGAG	1990	GTAGGGATACCACCATGAAA	944	AAGTGCACCATGGTATACAG	4294
CATAGTAACGATCCACGAGG	1988	GCGGGTAAACTTATTAAGGA	944	CTTCCCGTATCTATTACAAG	4294
GCAGAAGCACACATATCAGG	1988	CGATTGTCCTACGTTTAACA	944	TGATCACTCTGGATAAAGGG	4294
CGAAGTGACCGGTCTAGAGG	1987	TATCCCGCTCTGTTTACCAA	944	CGGTCCACCCTGGTACAAGG	4294
TCGTCACGAGCGCCACTCAG	1982	CTACACTTTTCGGCAATGAG	944	CTTGCACTTGTGACTCAAGG	4294
GTGTAGCCTAACGATTAGGA	1982	TTAGGCTTTTACGTACTGGA	944	CGGAGCCCAAGGTCGATACA	4294
CGGGGAGTAAGTTAATTAGA	1981	CCGAAAACATGTAAACCGCA	944	AATAAGCATCCTCAGTGCAG	4294
AGATTCTAACCTTATTCGAG	1976	CTACGGGCAGCACCTTACCA	943	CCGAACAGTTTCCATTCGGA	4294
CATCTTAGAAAAGTTCAAGA	1975	CATCCCATCACAACATTGAA	943	CCACGAAAATAACTAACCAA	4294
CGTAATAAAAGGTTATTCGG	1975	CAGCAAGGAACATATCGAAG	943	CATCGATTACTTACGAACCG	4294
CATAGACCTTGACTATCCAA	1974	CGACAGTCAACAGCGTAGGA	943	CAGGTTTACCACACGAGACA	4293
TTATTACCCTCTCTTTGACG	1973	CATTCATTTTGTCAGTAGAG	943	CATCGACTTCCGGAGTCCGG	4293
GGTTACTCCTTAGCTATAAA	1971	CTTTAAAGCAACGCTCACGG	943	CGTCCCCTATTCGCTTCCAA	4293
CCGTTGGTCTCCCCTCCGAG	1971	CTTCATGCCATAATGCCGGA	943	ATAGCACTTAACCAAATCGG	4293
GCGCTGCCAGACCCTTCCAA	1970	ATTCGCTTTGGGTTGTGACA	943	CCGCTCTCAGCTGATCCCAG	4293
CCGGTGGCAAGCACATTCAA	1967	GTGGTCCAAGCAACAAGGCA	943	CATCAGATCGGCATATCACG	4292
CAAGAAACCATCCCACCAAA	1966	TCGCTAGATTTTTTACGCGA	943	CAGTGTTTACAGAAGTAACG	4292
ACTAGGAGTATCCAGAGAGA	1966	CATTACGGACGTGAGTTAAG	943	CGTATCCATGCTAATTTCCA	4291
TCTCTTGCAGTCAAGAGGAA	1965	CCGGGATAATCGGCGTCAGG	943	CGTCTAGTAGTTGTATGAAA	4290
CAGGGCCGCCATTATCGGCG	1963	GTAACAGGCTATCCGAGAGA	943	CGATGAATAGGGACAATAAG	4290
GCAGACCAAGAGCAACGAGG	1963	AATTACGTCGGATCTCTGAA	942	CCGGGGCTATGCATGTTGGA	4290
TAATGCAACGGCGCGACCCG	1961	CGTTGTCGAGCCGAATTGAG	942	CTATCGGCAGTCCATTTCCA	4289
CAAAGGGACCAGCAACGAAA	1961	CCTGCCGAACTCATTATAAA	942	GCGAGTCACTGGTAAACGGG	4289
AGTTCTCGCACGACTAGCGG	1961	CCGTGCCTTGCAATGCGCAG	942	CGTACGACCTACGTGCAGAA	4289
CGGTTCCCATTTAATAAGAA	1960	ATGCCACGAGAACTGTTAGA	942	CGACTTATCGTTTAGTTCAG	4289
ACAACAATACGCATGCACGG	1959	CCTACGCCATTCGTTCGCAA	942	CCGGCTGAACGGGTGAAGCG	4288
CGGCTTCTATATGTAAGAAA	1959	CAAACATGCTCGTCACTGCA	942	CAGACCATTCGACATTACCA	4287
CCGGGCGAAGCCCAATACGA	1956	CGGGCTCGTTTCCAGTGCCG	942	TGGATCACAGGCCATACCAG	4287
CATATTAATAGCATAAGCAG	1956	CAAGGCCCAGCTCTGTAGAA	942	AATGTGACTGTAGTACAAAA	4287
TTTGCTCGACACGCTCCCCA	1956	TCAACCCCTCTGGTAATCAA	942	ATTACTGCATATACTTGCCA	4287
CGGAGTCCCAAAATATCGGG	1954	AATGATTACACGGAATCAGA	942	CAGGTAACTTTTTCTCCCGA	4286
CATCCCGCCTGTGTGCGCGA	1954	TCATCAGAATGCTAACTCGG	942	CGTCGTAATCCTTCTTCGGA	4286
CGGAAAGCCGGGGAAAACGG	1949	TCTGTGCTATCCCCATAACG	942	CCGAGCACACATGCGATGCA	4285
TAGTCCTGAGGTGATATGAA	1948	CCGCCTGTATCCCTGAGAAG	942	CATTTCGGATCCCAAACCGG	4284
CGACCTCCAGATTATACGGG	1948	CCTGTCAGACCCTATTGCGA	942	AAGGGACATCCCGTGCACGA	4284
CGACGACCTGTCTTACAAGG	1943	CATCCCGGTTCGGCACGCCA	942	GAGCCGCGATTCGCTCCGAA	4284
GTAACGACCGTCAATCAAGA	1942	CGGGTAGTAAAACTGTTGCA	942	GGAACACCCAACCCACGGCA	4283
CAACTCAAACGTCAATGCAG	1940	CCTAATGCACCCCATTTCCA	942	GTACGATCACTGCTTCAGGG	4283
CCTGCCAATTTAACGTTCGA	1937	GCAGCGTCCGGATCTCCGAA	942	CAATTGAGCACTTAACGGAA	4283
CCAGTAACCACCTATAAACG	1934	CTTAAGGGCCCAATGCGGCA	942	CCAGTAAGTTCAATACCGCA	4283
CAACCTGCAATCTATACGAA	1931	CAGGGCCCAGCAATAAAAAA	941	CCATATACAATTTCGCCCCA	4283
GAATCATATGGGGCGCAAAA	1931	GAACCTTGTAATACGTGACA	941	CAATCATGAGCGGATCGGGG	4282
AATTCCGTACCTCATCTACA	1929	CAGATAACAACTATTACACG	941	TAGCACAAACAAGCAAGGAG	4282
ACTCTGACCTGCCTGCACCG	1928	CAATTGGGCTGTTAGACACA	941	CCATTGGAAGCGATGTCAAG	4282
CGTTACCCCATGGCATGACA	1928	GCATAGCATGTCCAATCCAA	941	TATGCGGTAGAAATTAGGGG	4281
GTGAATGCACGGCTAACCAG	1926	GCATACCCTCTCGAACAACA	941	CTGATGATTACCCCGAGGAA	4281
TCGGGCGGCCGAATTCAAGG	1926	AAGTTCCACCTTTAACTACG	941	TAGAGGCCACCACATACCCG	4280
TGGGCTCGATGACTGCCCAA	1926	AGATGAAGATAATTTCGGAA	941	CTTTGCAAAGGACAACACGG	4280
TTGTTATTAATCCTACTAAG	1925	CTACTCGCACAAGTACAAAA	941	TGGGTGCCTCGCAAGCGGGA	4280
TGGATATATCCGACATTGCA	1925	CTATACGCAATCATACCCAA	941	AAGCGGACACAACCAACCGG	4279
CCTGTGCCACTCTTGTTGGA	1925	CGACATTTCAATGATAACGG	941	ACAAAAATCACCAAGTCGCA	4279
CAATGATACCATCCACGACA	1924	CGGTTAACAACTCAGTAGGA	941	CGTTGATCAACCGAACCCAA	4279
CAACTTGGAACGACGAAAGA	1923	TTACCGGCCGACTAAACCGG	941	ACAATCGTTTGCTTTCCAAA	4279
CAAACCTGCCGATCGTGAGG	1923	TTGGTTATTAACACTACAAG	941	GCGCCGCATCACGAGAGGAG	4278
CAATCCCTAACATTGTAACA	1922	CCGGATCCCCCTCTTTTCCG	941	CAAATATAACCGGAGAGACA	4278
AGACTCATTCAACAGCTCCG	1921	CCTTGGTCAGGTATTCCCAG	940	CGTTAAGCCGACCCTTAGAA	4278
CTAAATCCCCTGAAGAGCAG	1921	TTACCCCACCCATTGTCAAG	940	CAACCCCGCCCTCTGATGAA	4277
TGGAAATCAAAGAATTTACG	1920	GCTACCATTATCCTTCCGGA	940	CAAAATCTTCCTACTCGCCA	4277
AAATTGCACCAACAGTTCGG	1916	CTTAATCAACCGTAGCGGCA	940	CGGGGCCCCCACCATTCAAA	4277
CCGTCGTATTGTACGAGAAG	1916	CCGACCGGATTTGCTCAAAG	940	CAACTCCGCATAACATGGAA	4277
AGGTCCGCTTCACAACTCGA	1915	TGAGCAGCCGCTCCAAGACA	940	CGTTACCCCCCTTTATCGCG	4277
CAACTCCTACTACAAACCAA	1915	CGACGCCTAAGTTATCTCAA	940	TAGCGGAGACTACTTAGAAG	4276
TGGCCCCTTTCGGTGAAGAG	1915	GCTAGCCCCTACCAAACGCA	940	CATAAGCCCGCCATGACCAA	4276
CTTCACACCTCAGTGTCACG	1913	CTGCATCCCGCCGTGACCAG	940	GGATGGTAACCTGAATCAAA	4276
GCAAAGGGAGAGTCTAAAAG	1911	TTTAATTGCCTGTTGTTAAA	940	CAATGGAATTGATAGCAAAG	4275
CGTCGTCACATAATTCACCA	1910	CGACGTGAATGATCGTTCAA	940	GCTTGTACCTTTATGTTGAG	4275
GAATTCTAAGGACCAATCCA	1909	CATAAAATACTCTCATGGGG	940	CAGCTGCTTATCATACTAAG	4275
TAATATGGCCGTGTTCCAAG	1909	AAACAGTACTGAGTGTTCGA	940	CGTGTTATTCACGAATGAAA	4275
CCGGTGCCTTACCCATCCAA	1908	CGTTACCGCTGGCCGCACAG	940	TAACCAATAGTAAATTGGAA	4275
CCACAACATAGTGTTTCAGA	1906	CCTAAAGGTGATACACCGCG	940	TATGCAGGAGTAACAATCCA	4274
ACGCATCCTCGACCGCGCAG	1906	CCGATACCACACGTACTGGA	940	CCTCATGGTTCTTAATAGGA	4274
CTGATCCCTGAACAGCCAAA	1905	TCATTATAAGACATACCAGG	940	TCGCGCTCATTCCCGCGGGA	4274
CGGCTCTTCCACTAGACACG	1904	CGGGTCAAAACTACATCCCG	940	CGGGACAACGCCATGAAAGA	4274
CGGCGGTCTTTCTAACTACA	1904	ATATCGTGATCCAATCAGCA	940	TTGCTAAGCGCGTAGAACCA	4273
AGGGTGGCCTGTTAATCGAA	1902	CTGTGCTACCCGCTAATAGA	939	CCGAACTCACCGCAAATAAG	4273
GTTTCGCACACTTAAACAGA	1902	ACGCTAGGTTTAATACCAAG	939	CTGTACCTCGACAATATGCA	4273
TCGGTACGTCTACAGACGCA	1902	CCTGTCTCACTACCAAACCA	939	CATGCGACCTTGTAGCCCCA	4273
CCGTTCACAGAGTCTACAAA	1901	CTAATGCTCTAGCTGACCAA	939	CGACCAGTTATTCTTAGAGG	4273
CGACACACTATTTTGCCAGA	1900	CTGTCACTCCGATTAATGAA	939	CTAATCTAAGTCTAAAGCGG	4273
CTTCTCCCCGTCTCTAGGAA	1900	CCATCCACCCGACATCAAGG	939	ATGCCCCCTAGGGTAAAAAA	4272
TCTAAATACTACAAAAAGGG	1899	TGGGACAGATAGTAGATAAG	939	CAACGATTATTTTTGCCACA	4272
AGTGTCGCACCACTACCCAG	1895	CCGAATCCTAAAGCATAGCA	939	CAGCTCGTTGGACAGCGAAA	4272
GCAGTCTTAATTTAGCTGAA	1894	CTTCGTGCCTTAGTTCCGAG	939	AGACGGAATACAGCGACCAA	4272
CGACAACGCTCGAAAATCAA	1894	AGTGATCGATCGATTACAAG	939	CTTCAGGTTTGTCAACACAG	4272
CGGCCGTCCCCGAAAAGGGG	1893	CAGACCATCCGGGATCTCAG	939	CCGTGAAGCTTAATAACAAA	4272
ACTAGAATATATTTGTACAA	1893	CTAGAATCAGCACAATTAAG	939	GCTGTGAACAGGCAAAGGCA	4272
GTTGCCGAATACCAACGGGA	1891	TAGGTCCGCAACCCATTAGA	939	CAACTTTAAGAGGTAATAGA	4270
ACACTTTGCGTTCAGCTGCG	1890	ACTTATTGCAGGGCTACAGG	939	GTGTCGATAACCGAACTAAA	4270
CATGGTGATATTACGAACAA	1888	CCACTCACCGGGGAACAGGG	939	CTGTCTTAACGACCATTAAA	4270
TAACTGCATGCAGCACCAGA	1888	CTATGAATCTCATAGTCCGA	939	AGAGCTTAACTAGTTACAAA	4270
AATCACTTTGCACCGCAACA	1885	TTAGCAACCTGAATGATCAA	939	CCGTATACTTGGGCTTTAAA	4269
TTTGGCATCACATAAAAAGA	1885	ACATCAGACGGACAACGAAA	939	ATTAACACCTTGATGACGAA	4268
AAGTGAAATTCAGCAAAAGG	1883	CAACACGACTCGCTGCGCCG	939	TAGTGCCTTATCGAAATGGA	4268
CCTGAAGCCCGGATGACGAA	1882	CCTTGTGGAGAGGTGAGCAA	938	TATCCACGATTTCAACTGCG	4268
CTGTATGCCACATCTATCGA	1877	GCACCTTTTCTATTTTGGCA	938	CGGTTCACTAGAAAACTCCA	4268
CAACTTACTTACTCTTCGAA	1877	TAGGAAACCTGGCAATTGCG	938	CCGGGACATCTTCAGCTAGG	4267
GGAAGATAAGTTGAACGGGA	1875	CTAGGGTGACCGTCTCTGAG	938	CCAAAGGTCACGACTTTCGG	4267
CCTTCTATCCGATATCGCCG	1875	CAATAACATGTGTTACCAAA	938	GAACTGCTTACTCTGCGGCA	4267
ACACCTTCCATTCCATCGGG	1874	CTGTGCTACCCTTCGCCAAG	938	GTTGGGGAATAACAGCCGGA	4267
CCTGCACGTTCATCACCAGG	1872	CCTCTCGCCAGAAAATGAGA	938	AAGCCCGACAGCCTGTGACG	4267
CGATGATTCGCACAATACCG	1872	GCTTCCAGCTTCCCATTCGA	938	AAGATTCCACGGGCACCCCG	4267
ACTTCCGGCACCCATTTGAG	1871	CCAAGTTCCTCGACACCGGA	938	TCAAAATATAGAACGTCACG	4267
GCAGTCTGTAGAATGAACCA	1866	TCACAAAGATAACCGACAAG	938	CCAGGAATAACCGCGAAGCA	4266
CCGGTCCAAGGCCCACAGGG	1865	CTAGGGCTTGAGACACCGCA	938	CTATATTTTTGAGTTACCGA	4266
CCAATCTGCACAGCGTCAGA	1864	GCTTGATCTTAACAGACCAG	938	CAGGCATCTCCTCATCCCCA	4266
CAACACCCTTTCGCTATCGG	1862	CGTAGTTACACAAATTGGAA	938	ACATCTTGTCCGATATTCCG	4266
GCAGCGTCTGTTTATCTCCG	1861	AATTGAGGTCGCTTAACAAA	938	CTTCGAGGCCCCAAAACGAA	4266
CAAGACCCCCTATAATAAGA	1860	ACGCAACTTATCATACAGAA	938	CGTCTGAATGATTCTCGAAA	4266
TTACACCCCTCGATTAGGAA	1860	TAGGCGCTACCCGCAAAGAA	938	CGGAATAGAACCACATCACA	4266
CGTGCCCGACTCTTTAAAGA	1858	CTGTCAACTCCGTAATACAG	938	CTTCATGTATGACCACAAGG	4265
CCTAGTGTTAAGCAGCCCGG	1856	TGAAGTTGAACAATAAGCCA	938	CGTCTAGACGGCACGATAAA	4265
CCGACGTGTACTACAATAGA	1855	GTACCAAGCGTACAATGGGA	938	CCAGCTCGAGCAATTACAAA	4264
CCTTGATAACAAGAAACAGG	1855	CTGGGCCATTACACAAGGAA	938	GCGTAGTATCGCACGATACA	4264
TGTAACTAATGGTAAAGGCA	1855	TCGGTCTCCACGCATCTGGA	938	CTACCCCTCAATATAAGAAG	4263
ACAGATCTCTTGGTATAGCA	1854	CAGTGCTACTGGTAGAGCGA	938	CCACGGTTCCCAACTCAACG	4263
CCTCTCACACACGTATCGCG	1853	CATGGTCGTCCCGAATGGCG	938	CTACTAAATGTAACTTTGAG	4263
GAATCAGACCCCCATAGGGA	1852	CCAAGAGCCAATGTTTGCGG	938	CCGTGACCACGTATGCCCCA	4263
CTTCTACCCTTTCATTAGCA	1851	TGGAATTGTTTATCGATACG	938	TCGCCTCACTACCATTCGCA	4263
ACATAAGCATTGTTGTTCAA	1851	TCACTACCCGACCCACACGA	937	CGTCCTATATGTAATCGCAA	4263
TAGACGCTTGCCACAACACA	1851	CAAGATCCTAGTCCTCACCG	937	CATCTCTTACCCCCATCACA	4263
CCGCAACTTGGTCTACCAAA	1848	CAAGGCTTAAACCAATTGAG	937	CATTAACGATGTGAATGACA	4263
CCGATGGATTTTGCTCCAGA	1848	CCTGGAGAAATAATGAGCAA	937	TCAACTGGAATCGTATGACA	4263
TAGCATCCTCAATCTCACCG	1848	CTTGCGTACCAGTAGACCCG	937	GTTACGACTTTAAAATTGAG	4263
AATCGTAACCCCATTAGAAA	1848	GCAGGAACACACCCAATCCA	937	GTTAAGCTTTGCCATAGGAA	4263
CCGTGAACCTTGCTACGCCA	1847	CTGGTTCCCCATGAACGACA	937	CAAGAAGTAATATCGTAACG	4262
AGTTTCCCTAAAAATAAACG	1847	CAGCCGCCCCTAACAACGGA	937	CAGAAATTTCAGATAACGCG	4262
CCACCGTCTGAGACATGAGA	1847	CTAGTCTCCGCCATGCACCG	937	CTAAGTAAATGTTATTAACG	4262
CGTGACACCAATTATACCCA	1844	CATTTGTACATCATGCTCAA	937	TATGGTTACCTCATGAAAAG	4262
CAAGGACGCCCAACAACGAG	1842	ACGGCGCACAGCGCATGCCA	937	CTATAGAATCCGAATTAGCG	4262
CAAGATGTACGGGCGTCAAG	1839	CAGCGTGTCCCGGTAACCGA	937	ATGCGCTTTAAGGTAAGACA	4262
CGATTGCTCCTATCGCCCGG	1838	AGGGCGAGACCGAAGAGAGA	937	GCGAGGCCCCTCTTAATGGG	4262
CGATGGGACACAGATTAGGG	1838	GTGACAATCTGAACTTCACG	937	TAGCGACTCAGATTTTGACG	4261
CTTCTGTAACTTGAACCGCA	1836	GCGACTACCAGGCCAAAGCG	937	ATACGGGTAATGACTCACAA	4261
CGATACACCTTCTAGTCCGA	1833	CATAATTCTGCACCTACACA	937	CATAAGTGTTCACCGAGCCA	4261
CCTACGAATCGGGCGAGACG	1832	CCACAGACAACCATAAGCAA	937	CGTCTGGCACATAAGCACGA	4261
TATTGTCTAACGTATCGGGA	1830	TGGGCCAACCATCTATTACG	937	ACAGACCGTGCGACATACCG	4261
CATTTGGGATACGTATGCCA	1829	CCGGGTGTAACACATACCCA	937	CTTTACTCTCTCACGTTACA	4260
CAACCCGCTAGGTAGATACG	1829	CTATGTTGAATGTTATGAAG	936	CTGCCTGCCCGGTCTCCCCA	4260
TGGACACGACCGTAGTAAAG	1827	CCGATACGACTCTTACAACG	936	CCGGCCACTAATCCGTCACA	4260
GTTGAAGTACCGAATATAAA	1827	GGATGGAGACAACTACGAAG	936	ATTTATACAGGTATGACGGG	4260
CAATCTATTTCACCAATACG	1824	ACACCTCAAAACACGCCGAG	936	CTAGTTCTCAGGCTAAAGAA	4260
CCTGGTATTAATGCATTCAG	1823	GCACGGAACACCCATACCGG	936	CGGTTCCCTAGCGCACTAAG	4260
CGATTTGATAACCATAAGGA	1823	TGATCGGTCGAAGCATAAAA	936	CAACTGCTTTGTACAATCAA	4259
CAGTGATGTCCGTCTCTGGA	1821	CCTAACCTATGACATCCCGA	936	AAGAGGACACCAGTAATGCA	4258
GCAAGCCCCGCTGCATAGGA	1821	GAGATAGGACGCGTGTTACA	936	CTAACTCTACGCTTTCCCCA	4258
CAAATGCTTTCCTCAACACG	1820	CCTTGTCTACCTTTATAGAG	936	CCTACTCCTCAATTTCACCA	4258
CAAGTGCCAGAAATGCTAGA	1818	CGTCATTGTGGATCTACCCA	936	CCTCTCGCCAGCCATCTCAA	4256
CTTAGGCTCCATTAAATCAG	1816	TAAAGTAACCACCAATACAG	936	ACTAGGTCAACGGCATTGAA	4256
CAATTGACCCACTTGCAGGA	1816	TGGAACCCCAGCAAATAGAA	936	CTGGATACAAGCTAGCAAGG	4255
GATAATATTATTGTGACCGA	1813	AGAGTCCTACCGATTCAACA	936	CGAAACTGACGATTGCCAGA	4255
GGTTCCACAAGCTTGCTCCA	1813	CAAGTCCCTCGAAAACTACG	936	CAAATGTTCCAGAATACGAG	4255
TGGTCAGACCAGGTATGCCA	1813	CAGCCACGTTCAATACCGGG	936	TTTGGGCCACCCTCTATCCG	4255
CTACCGGTAGCTGATTACAG	1811	CGATCCATCCAGATTTAACA	936	CGGTATCGTACATTGTAAGA	4254
CTATGAATCCTTGAGCCCCA	1810	AAACATTGACCACCGACGCG	936	AAAGCTCGTGAAAATATACG	4254
GTTTTGCAAGGCGCTAACAA	1809	GCTGCACATCCGCAATGGGA	936	CAATTGGACCGCTATACCGA	4254
CCTGTTGCCGTCGCGTTACG	1808	CGTACATCCGGGCAATCAAA	936	AGATAGCCAGTCTATTTCAG	4253
ATGTCCATCCCGTAGCCGGG	1808	ATGGCTCGAATATTATCCCA	936	CATTCAACTTACCAGATCCA	4253
ACTGCCAACCCTGATAAAGA	1804	TTTACCATTAGGATGCGCAG	936	TGTAACAACAGGCCAAGCGG	4253
TAAACATTAGGCTAATGGCA	1803	GTTATTCCTCTCCCATAGAA	935	TTATTGAAAGCGGAACGGAA	4253
CTTAACCATTGGCTGATAGG	1803	TATGAAGGTTGCCCGATCCA	935	AGATGGACTTCCGCATCCAA	4253
CGTGAAGCCCCTCTTATGCA	1803	CTAGCATCCCGGACTTCCAA	935	CTGCAAGACGAAGTTCACGA	4252
CCGGCATAACTTCCATGGCA	1802	CAGACAACTACCCCTCTCAG	935	GGTGGGACCAAGGTAAACGA	4252
ATATTCCACATTACACGGCA	1802	TATTTGCTTATTTCACCGGG	935	CGGAACCTCCATATTCGCGA	4252
CCAGATCTACCCGATTTACG	1801	ACAACAGGCCTTCCACGCCG	935	CTTTGGGCCTCTCCATTAGA	4251
CAGCGTCCCGAGGAAACGCA	1800	CTGGCTTCAATAACAAGAAA	935	CCTGTGTCCCCAGATACCGG	4251
CGAGCGACTCGGCAAAACCA	1799	GATCCCAGTCGCAATCTGCG	935	CATGCCGGTCCCATTTAAAG	4251
CTTGGTCGATCCCCACAGAG	1798	ATATCATTTGACTCAATCAA	935	TAGGATTGCTATTCTAACGG	4251
CTATTTGCACAATCTCTGAG	1798	CCTAGGCACACTCAATACCA	935	CAGTGCCCTCCAATAACAAG	4251
TCGACGGCTAACGTGCTGAA	1794	CGGCCTAGTATGTTAATACG	935	GGGATCACCCAAAAAACAAA	4251
TAGTGCCAAAGACCAATCGA	1794	TCGTGACTCCCAACGAAGCG	935	CCAACCCACATCACAACCAG	4251
CCGGGACACTGCCCTACACA	1794	TATAGACCACCTGTACCACA	935	ATGAAATAATCTTAACCCCA	4251
CCTGAATCATAACCTCAGAG	1794	TTACTCCCTAGAGTGTGCAA	935	TATCTCATTGGTACATCGCA	4250
CAGTGACCAACCATTCGCCA	1792	CGAGCCCTTCGCGATATCCA	935	CCATATGCCTGCGCAAACCA	4250
CATCGCACAGCCGTATCCAG	1792	ACTTGAGGTGACCTGCAGAG	935	CTTGTCAAAATGGTGCGGAA	4249
TTGTGCGATCAGCCAAACGG	1791	CGATTGCTACATTATAAACA	935	AAACAGTTCGGGATAATCCG	4249
CCGTATAGACTCGTGTGCAG	1791	GCGACCCTTGGTAATCAGCA	934	TATACGGCCCTACAGTTCAG	4249
GCACCTTGCAACACATTGGG	1791	CTATACTTATACCCACCGGG	934	CAAGGGGCCTAGACTACAAG	4249
CTTAATAACCCTTCGAACCG	1790	AAACTGATACCGACTAACCA	934	CAACTGGACCAGAAGCTCCG	4248
CTAAAGTATTGTCCATGAGG	1789	CATATCTCTTCATTACTGCA	934	CAATGGCCCATCTCTTAGCA	4248
CCTAACCCTGATTAGTAACG	1788	ACTGCTCGTACGATATTCCG	934	GGATCCATACCAGCGCCGCA	4247
ATGATACACTTCGCACGCCA	1787	TGATTGCGTGAAAATACCAA	934	CTAAACCCTTACACTCTCAA	4247
CAGGTGCCCCCCTAGCCCGG	1785	CATATGTATTTGTTGTTACG	934	TAATACCTAGTAGTACTAGA	4247
ACGGGCACACGCAAAACGGA	1784	CCGCGGCACACCCAGTCCAG	934	CTTGGTGCTTTTAAATGCGG	4247
GAGCAAGTAGTGAAACCCGA	1782	CAACATTTAGTCTCAATGAA	934	CATGTATGCTTGAAGTCCGA	4245
TCTACGGGTCCTCTAACGCG	1780	CGGCCAATCAATTTGAGCGA	934	CCTCCCAACTCCTAACGAAA	4245
CTGCGGCGACAACATCACCA	1779	GCTTGACAAGGCACTCACCA	934	CAGCGCTACCAATTGACCAG	4245
CTGCAGACACGGGAACTAAG	1777	TATTACAGTTGATCAAAACA	934	TAGTCGACCGCGAATAAAAA	4245
CCTCGCGAATCGAATCTAGA	1777	TTTTCCTCCTGATATACGGG	934	ACTGTACCACCATATCCGAA	4245
AATGTGCGAGATATAACCCA	1775	CCAGTGACAACACAACTCAA	934	CCGCTGTCCTCAGAGCACGG	4245
CGACACGACCGATCATGAAA	1774	TGTACGGGCTAATAAAGAGA	934	CCACTGGTAACCTTGATCCA	4244
CTAACAAACCAGCTTCACCA	1770	AGGCAATGTGTTGCTAAAGA	934	TATGAACGCCGTAATCCCAA	4244
CAAGCTATCTGCTCTTTAAA	1769	CCTGAATGATATCAGATAAA	933	CCGTGCCCAGGTTTAAAACA	4243
CGAAGTCCTGCAGCTCGAGG	1767	CTGCCAAACTCCTATATCCA	933	TAATATGCATATTTTTAGGA	4243
ACGTCTTTTCGTATGCCGAG	1766	AGGCACCCAGCAGTGTGAAA	933	CGACCTGACGATACAATAGG	4242
CGGGCGTACATCGCGTCAAA	1765	TAACAGGGAAGGGCATCCGA	933	CATACCAGTCCCGTATAACG	4241
CCGCAAAGTATCCTGTCCCA	1765	ACGGAACAATAGTATTACGG	933	TAGATATCAGTACTAATCAG	4241
CCTTAAGCTTGCTAGACCGA	1765	CTTATAACTAGCCAACTCCA	933	CCAGCCAAACTGCCTATCAA	4240
CATCGCCCCACTGTAACGCA	1765	TGTACAATATCTAAATCGGG	933	GCATCTTCTGTCCAACGGCG	4240
CTACACCCACCCATTAACGG	1764	TCGGGCTACTCTCTGCCGGA	933	GTTGTCACCCTTGCTCTGCA	4240
CTAAGCATCTTGAAAAGGGG	1764	TATTAACTAGTTACTTCAGA	933	TTTATGCTCCTACAAAGAGA	4239
CTTCCATTTGCACTTTGACA	1762	CCTCTCTTCGGTGTAAAGCA	933	CGAGTCACATCACTATAAAA	4239
CGTGAGCCACGTAAGCGGAG	1761	GGTCCATGCGCTATTATACG	933	ACTAGCACATTGCATTGAAA	4239
TGGATCTCAAACCTGAAGCG	1761	CTACAGTAACAACTATAACG	933	CTAGGGTGTCTATTGAGGCA	4238
CCTAACTGTAAAATTAAAAG	1761	CCATGCCCCTCACAATCAGG	933	CGTAGGCATTTACCTCTCCA	4238
CGGTAATGTTTACTTCAGAG	1761	CTAACCACTGAGTTACGGGA	933	CCTTACCGCAAAGTTACGCG	4238
TATCAATAACATTCTATGAG	1759	TGGATGCGATAGGCTACGGA	933	TGACCCCGAGCTCCACGAAA	4238
CCAAACGTCATTCAGTACAA	1758	AAATTCGATAAGTCTACAGA	933	ACTCCTGCTATTAAGCCAGG	4238
CCTTAAGCAGGATAAATGAA	1757	CAGCCCTAATTCTTGCCGAG	933	CTATCACCCAGTCCGTTACG	4238
CAAAGCTTCTGTCCGCCCGA	1755	TCGATAAATCTTACATAACA	933	CAGCCCGGTCTCATGCAGGG	4238
CGTGACCATCTTGATTCGCG	1754	CTATGCGAAACCCATCAGGA	933	CAACAAACCACGTTAAAAGA	4237
GCGGCAGCTTACGAATAACA	1754	CATAATCTAGGCAATCTCCA	933	TCAGCGCGCACCAAAATCCA	4237
CTAGGTATAAGTATTTAAGA	1753	CAACCGACTCCCGAGATAAA	933	CTGACGCACATATTGTGGAA	4237
CTATTCCGCGGCTAGACGAA	1753	AAGTAGTACGGAAAGCCGGA	933	CCGTCGACACCCCTGCCCAG	4237
TATCCAGCACGGGATCCCAA	1753	GCATCCCCCTTGACACAACA	932	TGGCACAGAAGCACTAGGGG	4237
TCACGTAGCTTGCCTCACCA	1752	TTATGGGATCAGGCGTTAAG	932	CGGCGAATCGCAATACACCG	4236
ATACAGTTCGGTGAAAGCCA	1752	AAATGGACCAATGTTACCAA	932	TGAGCCAGTTCGCTAACAGA	4236
ACTACCATACCCCCACTCGA	1752	CGACAGAAATGTCATTGGCA	932	AAATCTACCAAGGAAATACA	4236
TGTGGCTAAGCCCAACGGGA	1752	GGACTAGGAATCGTATGCCG	932	ACACCGAAAACGCTTACGAA	4236
CGACCTTCTCTGGATCGGGG	1751	CCGCACCCTCTGATATCCAA	932	TTAGGAACCTACGATACAGG	4236
CCAAACATTCTAGTACCCCA	1751	CGGGACACACAGATACGAGA	932	GCTTACGCACTCTTATCCAG	4236
AGAGCACCAGGGTCGAGACG	1750	CCGGCTACCCCTGAGTACAG	932	GGGCCATGCGCAACAACAGG	4236
CAAGAATCCGTAACAACACG	1749	TCGCTATCTCAGATGTACAA	932	CAGAGTTTACGGCAATCAAG	4235
CGTGGGGAATCGCAAAAGAA	1747	ACTACAAACCAGCTTACAGA	932	CTTAACATCTAGGCATTGAG	4235
CAGCGTAACCACTCACCGAG	1747	CATCATTTCCATATGCGCCA	932	ACTTAGGGTTCATCTTTAAA	4234
AGATATAACTCCTCGCAACA	1746	CAGAGCACACTACAGCTACG	932	TAGGCGCAAATGAATCTCCA	4234
CAGAATTAACCTCAGTCAAG	1744	CAACATCCTCGGCTTAGCAA	932	GTTCGGCCAAAGTATCGGAG	4234
GTGAGGTGAACACATAGGGA	1744	GTAACGATTTCCACTTGCCA	932	TATTGACCACATGAACCCGG	4234
CGACAGGCACAACTGTTACA	1740	CGAACACATGGATAGACGAA	931	ACGCCTCCTCGATATCTAGA	4233
CTAAAACAACCAGCGCCAGA	1738	CGTAGCGCCGGTCCATCCCA	931	CTGAAGTAACCATAGCAGAA	4233
CAACTGGCCTATCAGCCCAA	1737	GGAATATTCCGCTAGAACAA	931	CCTAATCATTACGAATAAGA	4233
ATACTAAACAGTACGAACCA	1737	CTACCTGGTACGCAGCCCAG	931	TCATCGAACACACCTTTCAA	4233
CGTGGAATCCTTAAACCGAA	1736	CGTTGGCCTGGAACAAACGG	931	ACTGACTTCCGAATGAGACA	4232
TTGGCCCCAACCATGTTGCA	1736	CTGGCCACACAAATAAGCAG	931	CTTATATACCACACTCAAAA	4232
CCAGCGTGAGAATTACAGAG	1734	CCTCATTACAGAAAGCCGGA	931	CGGCAGTCCATTTCTTTAGG	4231
AATTCGACCCATCTAATGGA	1734	GCGATAGCTCAACTATGGCA	931	CTACTAATTGATCTGAACAG	4230
CATTAGAATCTGCTTCCCCA	1733	TCGCCCCCTTTCTAATCACG	931	ATGACATTTTGGGTAATACG	4230
CCGAAGTGTCCTAAGCTCCA	1733	TAGCGCATATTACATCAAGG	931	CCATGCCTATACTAACACAG	4230
CTTCGATCAGCCTCTATACA	1732	GTGGTATATTAGCCAACGGA	931	AGGTAGGAATTTAATCCCCA	4230
ACTTTGTTACTCATATGGAA	1732	TGAATGTGACTTAAATCGAG	931	CCATACGAAGCCACGCCCGG	4230
CTAACTCTTGAAATGAGCGA	1731	CAGTACCCTTGACCAACCCG	931	ACGTGCATAACACCATTACA	4229
CGTCGGCTTAGCGTTCGAAG	1730	CCGGTATACCTCCTGTCAGA	931	CTATACATACGGTCACGACG	4229
TTTTCCGAATATCCGTTCGA	1730	CGTGCAGGTAAAGTAAAACG	931	CAGCTTGGCTTGCTTCCAGG	4229
CCGCCGTTACACAAAATACG	1729	ATTCTTACTGGTATGCAGAA	931	ACGGTTTCACAAGAACCAAA	4228
CAATACGGCGAACAGCCAAG	1729	TTGTCGGAACCTGATTACCA	931	CGTATCAACTAAAAACTACG	4228
CGAGTTACACGACCACAGGA	1729	CCTACGGTAATGTAAATACA	931	CAAATCAGTGCGCCAAGGGA	4228
CTTGCTACAATCGTTCCCAA	1729	CAGCGACTAACAACGAAAAA	931	ACACCTAGCAAAGTGCGGCA	4227
CGAGCTGAAACCAAACGGGG	1729	ATTGTATATGTGGAGCACCG	931	CTATTACCCACCACAAACGA	4227
CTATTAGGTCCATTTCCGAG	1728	ACAATAACTCCCCTTTGCCA	931	TGGTTTGGAGGCAAGTGACA	4227
CCTGTCACTCAAATATTGCA	1727	TTGTATATTGCTACATCGCA	931	TCTCATTGTAACTCGTACGG	4226
CTGTCCAACTACGTTTACCA	1727	CTGGCGCGTACGATGCACAG	931	ATTCGTTATTAACTAACAAA	4226
GATCCCACATGTGCTCAACA	1727	CTGTCACCCAGTCTAACGCG	931	CGTAGTTCTAAGGAAACAGG	4226
CTGAAAAGACAAGTACAGAA	1727	GTACATGGCAACTAAATACA	931	CCTGCCCCACACGAATGCAA	4226
CGTGCATCCAACCCATTAGA	1727	GATGATTATCGGTTAACCGA	931	AAGGGGTTTACATCGACCAA	4225
GCTGTACGAAGTCATCTGCG	1726	CTGTCTCCTTATTTACGACG	931	TATTGTCAAAAACTGTTGCA	4225
GCAAGGCATCGACATCGAAG	1725	AGTACGTAAGGACTTCAAGA	930	CTATCCGTCTACACTCCACG	4225
ATTTTTCTCTTATTTAGCAA	1725	TCTATAAGTAGGATACCCGA	930	ACTGAGAGCGGGCTGCTACG	4225
TCAAGGTCAGCCGATTCGGA	1723	TAATGTCGCTACCATTTGGA	930	AATATTCTCACCAAACCCCA	4225
CTTTTAAATAGCTTTCCCGG	1722	CATGTGTCCGGGTAACTCCG	930	GCTGCTATATATCTTCCACG	4225
CCATCCAGCTTAGAGCCCGA	1722	ATTTGAATCCCTAATATCAA	930	ATTAACAATATCCAACACAA	4224
GCTTCGAAATAGTTACAGAG	1720	CCTGTGCCACTCTTGTTGGA	930	CGATTTGTCCCTAATCAGGA	4224
AATGAACGAAGTCCGATCAA	1718	TCACTACGCCTACCGATCGA	930	CATTAGGACCAAATTCTACA	4223
CGATCCGCTATTCCAATACA	1718	GTAAACACCTATGTATGGAG	930	CCAAAATCTCGCGCTACCCA	4223
CCTAATAGCCGAAAACACAA	1717	TAGTTATCCGTGCTGCACAA	930	GCTATAACCTTATCGCTGGA	4223
ATGCAACTCTTGCCACGGGA	1716	GCTACGCATTCCAAACCCCA	930	ATTGTGCGTCAGACTACAAA	4223
ACTCTCCTTTTTGATTAAGG	1716	GTAGCTGGCCGCGAAACGGA	930	CCGCACCGTCAGTCATTCCA	4222
CCTTTACACCCCCCATTACA	1713	TAGACTAATGACTCACAACA	930	GCACTGAACACACTTACGAG	4222
TGACTATGACATATTCTAAA	1712	ACAGGACATGGGAAAAGAGG	930	GCTTAATTACCGACGTTCGG	4222
CCAAACAAACACGCTCAGCA	1711	GGACTACTAACAGCTTAGCG	930	CTTGAAGAACTTCATCCCGG	4221
CTATCCCCCGCTATTTTCGA	1710	CAGGCTGAAATATCTAGCCA	930	CATAATTCCCATATATCAGA	4221
CCTCTGACAAATACTTGAGA	1709	GCGCCATTTATGCCACGGGG	930	TTGAGTCCCCTCCCTAAGAG	4221
CTGACTGCAGATTTGCACCG	1708	TAAGCGTATTCATTACAGAG	930	GGATCCTCAACCTTTTACGG	4221
CGTTCGGTCCACCATCTCAG	1708	GTAGACTTATGGATAACCAG	930	CATCTAGACAGACCTCCAAA	4221
CAAGTAAACTCCTCACCCAA	1707	CCGGGCAACACTTCAATGCA	929	GTAAGGATCGGCTCAAACCA	4220
TCAAGCGATGCCAATATACA	1707	CCGAGTCTTTAATTGTTACG	929	CCTCAGCCTCAGCATAAAGG	4220
TAGAGATACTGCTATTTCCG	1706	GCTGCTTACCTCGAGACGCA	929	CTACGGTATTCTTCGTCAAG	4220
CAATGTCCCACAGATAGCGA	1703	CGGGTATTCCTACCGACACA	929	CCACATACATAATTTCTAGA	4220
GTGGAGACACTCAAGAGAAA	1703	AGTGCCCTTTGAGTTTCCAG	929	CAAGTGAAAGAACATTTCGA	4219
ACACCCTACGGTACGCCCAA	1702	CGAACGCATACAGAAATGCA	929	CTATCCTAATGGAAAACCAG	4219
CCAACAATACCACTGTAACG	1702	CAACGCCCACCTCAGAGGAG	929	TCAGAGTCCATCTTTTCACG	4219
CTGCAATCAATACTGCCGAA	1701	CTTGGCCTTGCAACACCACG	929	CTTTACAATATCTCTAGCAA	4219
GAGTCCGATCTAAAATTAAG	1700	GTTTACTGCAGGCCGCGCCA	929	CATTCTGACAGGATACAACA	4219
CGTCTGGGAAACATTCAAGA	1700	TTGTTGGGTTATCTTCTCAG	929	AGTTGCAGCCTGCCGCTGGG	4218
CATCCCGGTTCGGCACGCCA	1699	CCAATTATATGTCCGATGCA	929	AGGGAATACGCGGTTTGACA	4218
CGGCCCCATGGACTATGGCG	1698	CCACGTTCACGTGATCTCCA	929	AGATTTCCCTGTTCTATAGG	4218
CAGTAGCACATAGAAACCGA	1697	CGTTCAGTAACCTATACCCA	929	CTGTCCAGAGGATTAAGGAG	4218
CCGAGTCTTTAAATGCGAAA	1695	CCAAAGCATAATCCACCGAG	929	TCATCATTACCACCTTAGAG	4218
CCTACTGAACAGTCACACAA	1693	CGGATCAGCCGAGTTCACCA	929	ATATTTTGCCGTGCATAACG	4217
ACAGGACATGGGAAAAGAGG	1691	CAATGCCATGGCCTGAACGG	929	TGGTCATATTTGTTTCAAGG	4216
GGTACCTCACCGCCTTTACG	1691	TCTTTAAGTATACTGATACA	929	CATCGTCCAATCGTGCCGCA	4216
AATACCGATGACCATCAACA	1690	CGAGCCGCTGAGGCTCAAAG	929	TCTCACCCTAGCCCTATAAG	4216
CCATTTGGCGACGCTTCAAA	1688	CTATCAAATGGCCTAACCCG	929	CTTCCTTACGTGCCGCAGGG	4216
CCGGTGTTAATATTGCCGGG	1687	CTTGGCAATAATGATAGACA	929	GCTAAACTCGGGCTAACCGG	4216
GCGAGGTCTGAATCTTCCCA	1686	CCAATATTACCCTAACTCAG	928	CATCAAGGAGTATCGACGGG	4216
TTTCCGATTGGGCCTCTAGG	1684	GGGCAATGCAGATCTTGAAA	928	TAACTCACCTGTGATAACGG	4215
ACTAACACCGATTTACCCGA	1683	CGTCGAGGCCCAAAATGCCA	928	CATGACCTTCGGATACTAAG	4215
CCACAATTCATTATATTCCA	1682	ACTTAGGAATATGAACCGGG	928	CATCATGTATACACATCAAG	4215
GGATATAAAACAGTATCAAG	1682	CCAGGACCACCCTAGTCGAG	928	ACATACGATTTTGCATGAGA	4215
CAACATGTCCACGTTCACGG	1681	CATACATTAGAGACTACGAA	928	CGATGTCCACCATAGCAACA	4214
TCAAATTAATATCAGTAAGA	1681	CATCGTGGTTCCACATCAAA	928	CAAGGCCGCAGAAAATAGCA	4214
CTGCCTCCCATGGTGTACGA	1679	CCTCTCAACAGCACTAACCA	928	GGACCTGAAAGTGAAACCCA	4214
CAAGGTCACCTACCACTCAG	1679	CTAGCCCACAAGATTCACCA	928	ACAGGGCGCTGCTCAAAGGA	4214
CTTGCTCCACAAGTGCTAAA	1678	ACAAACCCCTCATTATTAGG	928	CCTGGTGAAACTCCACGAAA	4214
CTAGAACTTTCAAATAACCG	1676	TAACCTGACCTGATATGGCA	928	CCTTGGATTCTACTTAACAA	4214
CCTTTATACGAAACACGACA	1676	CTACCTGATAAGTTTCACCG	928	CCGTCTTACAGATTTCACCA	4213
CCAGAATCCACATAGATGGG	1676	ACTACAGCTCCAACGCAGCA	928	ACACCTTAATTTGTATTGGA	4213
AAGCTAATAACGAAACAGAG	1676	CCGCGTCACTACGAGCCGAA	928	CCAAATATCACCAATACCAG	4213
AGGGGCCCAGGAGTAACCAA	1675	CCGTAAGTAAGCTCGCCGAG	928	CCATCGTACAAAATACTAAG	4213
CTATCCCGATGCACTCACAG	1675	CCTCTATATGCTCCGTGCCG	928	CAAATCCACGCAGCAAAAAA	4213
CGAAGTCAACATCCACCGGA	1675	ACACGTCGTCCTGCAACCGG	928	GCGATAGGCCATCTGAAAAG	4213
CAATCTCACTATGTATCCGA	1674	CGAACCGTTCGGTCGCCGGG	928	GATAATGCCCTCTCACGACA	4213
CTAATTCTCAGTCTAATCAG	1673	CCGTCGTGCTAGTCTTTGGG	928	CGACGGGACGAACTATAACA	4212
ATTTGGCGATACGATCTAAA	1672	ACTGCCGTACTAGTTTTCGA	928	CATTGTGTAGTACATTGACG	4212
CAGAGACTACGTCCGATCCA	1672	CTTTGTACCCATTAACGCAA	928	TGGGACTTAGTAACGCTAAA	4212
TCGGTAAACAGCCCTACCCA	1671	CGAAAATGTCGTGCACCAAG	928	GAAGAGGACCTATCGACAGG	4211
CTGTTCGGTCCCGTGTGACA	1670	TCACAGCTTCAGCCTCTAAG	928	TTTGGGGACCTGATTTGAAA	4211
CTGGAATAACATGCATTAGA	1670	GCAAAATACCAGATATACAA	928	CATAAATCTGGTCAAAACAG	4211
CAGTCAGAAGGTCCGTTAGG	1668	TTATTGGCCGAATAGAGCCA	927	GTGGAGGCCATCTAGTCACG	4210
CGTTTTACTCCCATACCAAA	1667	CATAGAACTATAGAGTTACA	927	TGATAATCCTCGCAATCAAG	4210
GCACCTATCATCGCATTCGA	1667	CATAAGTCTCAAATACACGG	927	CTAGAACAATCCATGTAGGA	4210
GGATTTGACACTCTACTACA	1666	CGACGGTAATTCCCATCCCG	927	ATGTAGGGACTTTCGACAGA	4210
CTAGGTGGCGCAAAACGCAA	1664	CCAGTGTACGAGCATTACCG	927	TTATAAAATTTGCATAAACA	4209
TGACGGCCCCACGATCCGGA	1663	CCTCGCCACGTGTAGAGGAG	927	CTTTGTCGACCTCTGATAAA	4209
CGAATACAATTGCCTAGAAG	1662	CCGGTTACTTTGCCTCTAAA	927	CATAGGAGTGTTCTTAGGAG	4209
CATACATTAGAGACTACGAA	1660	CTACTTCCCCACCCGATCCA	927	CGACGTATCTTTTAGTCACG	4209
TAGTAACGTGCGACTTGGGA	1660	CTTCGTAATCGCTTACGCCG	927	CATCTTATACTCTCGCCCGA	4209
CGTGGATACCGCACGCCGAG	1659	GCTCCTCTCTCCCAGCCAGG	927	ACTAGGGCATAATCTAAAGG	4209
GGGTAGGGTTGTCCACCAGA	1658	CCTTCCCCCGCCGAGTCCAA	927	TTTAATACAACACCTATAGA	4209
CTAGACTACGTGTAACTGGA	1657	CTAGGCAGAACTAATTTGAG	927	CCTCGGACTCAGATACCACG	4209
CCGTAACAATGAGATAAAGA	1657	ACTGAGCGCCTTACATACCA	927	GTAAGCTATACCCTGCAACA	4208
CCAACCATTAGTTATATCCG	1656	ATAGACCCAAAGCCGAGACG	927	CAAGAACCCAGCCATAAGGA	4208
ATGCGACTTATACTGAAACA	1653	CAGCCGGTCCCAATTTCCGG	927	TCTTAGCGTAAATATCTCGG	4208
CGACAGTAATCAGTACCGAA	1653	TCTGAACCTATTAAGACCAA	927	CCGATCCAAACAGAATGGAA	4208
AATCTTCACGGCATAACCAA	1651	CTTAGCAGAGTACTGATACG	927	CCTAGGCCTACCAAATAACA	4207
CTGTTCCCTATCTCAAGACG	1649	AGTCCCGATACAGTGTTAAG	927	CCAGGTGACTATCAATTACA	4207
TTTATGTACTACCTTATGAG	1649	TGAGATGCCTTCGTATTCAA	927	CGTCTCTTCGCTATTAACAA	4207
CCGTTTGACTACCAACAAAG	1648	TTGGTAAACACCTTACACCA	927	ACATTTAACGAATATTGACG	4206
CAGTGCGTATCCGAGATCAG	1648	CTGCCTGGCAGTACACTAAA	927	CTTGTTTACGAGATGAAAAA	4206
CCACTCGACCGCTTTACACG	1645	CTGTATGTTGGCACTAGCAG	927	CGGACCCCTCCCCCGCTAAG	4206
TCGTCAGTCATTACTAGGGA	1645	GATACATTAATCCAATCGCA	927	CTTCGTGCTTTTGAGCCCAG	4206
GATCTCCTCTACACGCTAGG	1644	CTTGTCTGAAGAGTTCTACA	926	GGGGATCAACTATTATCACA	4206
CTATGAAGCATTGCATTGCG	1643	ACTATTATCCTCGTGTGCCA	926	CGACAAGGATAACTTCTGAA	4205
CTGCGCGCCAACAAGCGAAG	1643	TAACTGTCCAGCTCTTGAGA	926	GGAACGTCTCTCAAATGGAG	4205
AGATCAACCCTGACTACAAG	1643	ACAACACATGCAGTGAACAA	926	CATCACATATAGTCTATACA	4205
GGACGGCAAGTAGAACGCAA	1641	CGTGATTTTACTCCATCCGG	926	CGAAGGTCTCGGAAACCCAA	4204
CGTCTTCCATTACTGTTAGG	1640	CCTCTTCCTCCGGCTTGACG	926	CAATCGGATCTTCATTTGAA	4204
AAACAGGTTCGACATCCAAG	1640	AAATGCTGCACTGCAACGCG	926	CATACAATCACGGAGATGAA	4204
CTGGATAACCTGGTGATGCA	1640	CTGACGATAAAACTGTTGAG	926	GCGGTCCTTATCCAATACCG	4203
CTTCTCCTATCACAGTGCCG	1640	CTAGAATTACACCAACCAAG	926	CCTGTTGCCGTCGCGTTACG	4203
CCGGTGGTCAGCACTTTAAG	1640	CGGGCTAACCGGAAGTTAGG	926	CTAAAGCAAGTTGAATCGGA	4203
CAGCTGTATCAGTAATAACG	1639	CATACTAGAGTAGATCCGCG	926	CTGTGCCATCAGGTGTCACA	4202
CCTCTAGCAATTCTGAAGGG	1639	GATTCTTATAAGTTACGGCA	926	CGGGATTCTCCCGAACGGGA	4202
GATTCCCTCTGACAGATAAG	1639	CATCCTTGTACCAAACCAGG	926	CGGCCTGCCAGTACGCGACG	4201
CGATACCCTCCTATTTGAAG	1637	CAAGAAACCATCCCACCAAA	926	CGATTTAGAAGGATTTTCAA	4201
GCAGAACGAACACAGTACAA	1637	TCTGGAGTCTCATCACCACA	926	TTGGGCTCACGATAACCACG	4201
AAGTAACCTATCTTATAGGG	1636	CGTATGGACCTGCAATACCG	926	TCTCGGTATGACTTTAGAGG	4201
ACTCACGCACCTACTAACAA	1636	CGATGTCGCCAGAAACGACG	926	CTGTTTTAAAAGCTGTAACA	4200
TCTAGCTGCAAACAATTCAA	1636	TGGGATGATATATCGAAACA	926	ACAAATGCCCGCCAAATCGA	4199
CAATAGTCAATAGATTGGAG	1635	CAGGCCCATCATATTATACG	926	CAACAAACATCCCAACCCGA	4199
CTTGTGCTTACGATTTCACA	1635	GCGTAACCATTCGCGACACA	925	CAACGATGACCTCATCTGGG	4199
CCGGTAATAACCTCGAAACG	1634	CTAAATGTTGGGCTGACCGG	925	GCTAGAGGACACTATACGGG	4199
GGGCGCTTACGTGAAAGCAG	1634	CCACACGGCTTTCATATAAA	925	ATAGACCCTGACAAATTCAA	4198
TGATCTTCTTCCTATTTAAG	1633	GTGCTTAGTTTGCCGTAACA	925	GGGACCAATCCACTGACACA	4198
GCAGGTCAAACAGAATAGAA	1632	CCAGTGCTACTCGATTGACA	925	CTATTCCGCGGCTAGACGAA	4198
CTTCCCGGACCAAAATCGAG	1630	CCTGTCCCAGCTACACCGAG	925	CGTGTATATGAGACATCCGG	4197
CGAAGAAACCCATTTCCGGA	1629	ACTAATGGATGACCTCTCCA	925	GATTAAGTCTCGTTAACCAG	4197
CCGTACGGAATCACTCAAAG	1628	CCTAATTTCACCCTTCCGAG	925	GCAGTGAGAGCTACTTCGCG	4197
TTGGAACACCACGCGCCACA	1628	CAGCGATGAACCCAGACAGA	925	CAGCCCCTTATAGAACCGAG	4197
TCACCGGAAAGTATACCGAA	1628	ACAGACAATCTTTATTTCAG	925	CCTATATTAATGTAATCCAA	4196
CAACGCCCAGCAGATCAGCA	1627	CGTTTCTATGATCAATCCCG	925	TAACGACCACCTTATACAAG	4196
GTAGGTTGCCCCCCATGACG	1627	CAATTCCGACACTATTAAAG	925	GGATCTCTAAGTCATAGGGG	4196
TTGTCATCATTACCTTTAGA	1626	TTGACGGGCCATCAGACCAG	925	CTATGACCCCAATTACGCCG	4196
CTGGGAAGACTGATTCCCCA	1626	ATATTACTCGGGACAATGAA	925	CATAGAACAGATCTAACAGG	4195
TATTGGTCCTCGGAAACGGG	1626	CAGGCTGCTTAGGAATAACG	925	CTTTTAAATAGCTTTCCCGG	4195
TAATCTGAACAAGTATTACG	1624	CGGAAATCATCTTCATCACG	925	CTGACTCACACTCCATCCCA	4195
CAAGCTCAACCTGATTTAGA	1624	CCGTAACGCGTCTAAAGAAG	925	CAACGAGATACGGCAATGAG	4195
ACAACGAGAGCTCATCGAGA	1623	CAACAATATTTATAACTGGG	925	CAGAGCTGCGCAGAAAGCAA	4194
AGGAGGTCCACCCTAATAGG	1622	CGACTAGATTTCCCTCGCCA	925	CAAGTTCCTGATACTTACCG	4194
CTGCCTCGCTACAAATGAAA	1622	TGTCCAATCTGCCTACACAG	925	CAAGGAGTAAAACAGAAGGA	4194
CGGTCCCATTTAAAGCAGAG	1621	CCGCTATCCCACCTTCCCAA	925	CTGCCCAACTACCTACAACA	4194
TCACACATTGGATCGCAGGG	1620	CAGCCACCCCCGTAATCCAG	925	CCACAGGAATCCACGTTCCG	4194
ATTAAAGCAAGTAATCACGG	1619	CTTTATTCACCCTATATACG	925	CAATGGGTTACCTTGACGAG	4194
CTGGGCTAAGCTACTTTGCA	1619	CCACCTTCACGTCCAATAAG	925	CCAGAGCATTTTACACAGGG	4194
TAAAGTTCACGTACAATGGA	1619	CTTACTAAATATCCATGGAA	925	TCGCACCGCCAACAATTAAA	4193
AAACGCAGAAAGGTAATGAG	1619	AGTTAGATAAACCCGAGGAA	925	AGAATAAACAAACAATTCAG	4193
AGAGCCCGACCCCTATTCGA	1618	TAGTCCACTTGTCTATCAAA	925	TGGGTCCCTAAGACTTGCAG	4193
ACTTCCTTCTTGACACACCG	1618	CCAAAACTCCTCCTGACGAG	924	CTGAGGAGTTGCTCGAGACA	4192
CAATATCACTACCTTCGGAA	1618	TCATTCTCATAACAGCAAAA	924	CAGACCCCAAGCTCGCAACA	4192
TGGTGACGCACTAAATGGGG	1617	CTGACCTTAATTGTGTCCGG	924	GTGCGAAACAGCAAACCAAG	4192
CTGTCCCCTCCTTTGCACGG	1616	CATATTAATGCCATAACAGG	924	CCTTGGTCAGGTATTCCCAG	4191
CTAGATAATGCCGAACCCCA	1616	CAGTCTACTACCTAACGCAG	924	CTTTACATCTACCAGTCGAG	4191
CATGGCTCCTATTCGTAGGA	1616	AATCTACAAACAGAAACAAA	924	AAAGGGATCGTGCTGCTCAA	4191
CTAGTTTACTGTGCACCGAG	1616	CTAGCTCCCTAACATAGGCG	924	GCACGGTCACAGCATCAGGG	4191
CTTAATCATCCAGATAGCAG	1616	TTTCCTAGTGCGAAACAAGG	924	GAACTTCGAGCATCATAACA	4190
GCTTGGTACCGTTAACCGCG	1615	GTGCATACCCCCATATGACA	924	AGTGGCCTCAGACCTCCCAG	4189
ACTAGGTAAGTTCTATACAA	1614	CTGGCACGAGCAGATCCCCA	924	ACTTTTATACTAGTATCGGG	4189
ATAGCGAGACATCCTATAGG	1613	CAGCATCAATATGATCCACA	924	CTGTTTACCTAAACTTGGCA	4189
CTGTTTTGATATAATCCGAG	1612	GCTGTCGATACACTGCTGAG	924	CTTTTCTACTATCTTAGGAG	4189
CTATCAGATAAGACTTCCAG	1610	CGATCCGTATCGCAACCAGA	924	CAATAAGCTCACCAATAGGA	4189
CATTCCTATTTAAAACAGGG	1610	TGATTTCCAGGGCTTTCAGA	924	CTAAGGCACTCCTATAGCCG	4189
CTTACAACCCAACTGCTACG	1610	CTGAGCCTAACATCGTACAA	924	GCTTGACTACCAGTATGACG	4189
TCGGGAAATTTCGAGCCACG	1608	CAACGGAAAAACGTGACCCG	924	TGGTCGCGTAGTTAGCAACG	4188
CCTCAATAACAATTAAAAAG	1608	GCAAAAAGAGTAGCGCGGCA	924	TCAAGAAATTATCAGAACAG	4188
GTAGGGTTTTGCCAATCCAG	1606	CGAGATGACTCCATACCAGG	924	CCAAACGTCATTCAGTACAA	4188
CGGAAGCAAACTATGTGGAA	1605	ACGTTACGCTGACCGCTAAG	924	AAGAGCCACTACCTATGACA	4187
TCATCGATAACCTAACCCCA	1604	CCTGCGTGCCACTTGTAAAG	924	GGTACACTAAAAGAGCAAAA	4187
GCTCGAGAATGACAATCAGG	1604	CTAAACTCCGCCTCGCTAAA	924	TAGCGTGCACTTTAACAGGA	4187
CATGAATGTGAATCGACACG	1603	ACTATACCTTTGCTGACGCA	924	CTTATGTGAGGGTATAAAGG	4187
ACTGGTGTATTGCATATGGG	1603	CCGCTGCTCGTGGAGTACAG	924	CATTCGAAACGTCCAACCCG	4187
CCGAGAGTCCTCGCTACCAG	1601	CTATAGTCCAAGGTGTCAAA	924	ATTTACGACCGGCCGTCCCG	4186
CGGCACCTCTCGCAGACCAA	1599	CAGGGTGCCCATTCTAGGGA	924	AGTACCATATCTATAATACG	4186
CATTGCTCCCAGCCGCCGGG	1599	ACTGTACACATCCTGTTCAA	924	CTTTAGGGACATGTTACGAA	4186
ACACGGATATACCAGTTAAA	1599	CTAGGGATATCGGTACTGCG	924	TTAAGCCCTGCTATTCACCA	4186
TCTAGACTAAAGGATATCAG	1598	AGGGACGTTGCGGCATTACA	924	CTTAGGCCCCGTGCAATCCG	4186
CTATTAAATTCAGAATCCAG	1598	GAGGGAGCAGGCCCTCTGAG	924	CAGTTCGTAAACTCTTAAAA	4185
GTATCACAATGTTCTAGGGG	1597	CGGACAAATCGAATGTAGAA	924	CGTATCCACTCTACAATGCA	4185
CGGACATTCCATTCGTTCCG	1597	CTAATACGAGTATAACGAGA	924	GAGTTCCATAGTCCGAGGCG	4185
CTAAATCATTCAGCATAAGA	1597	CTTAGCCACTTCATTACAGA	924	CCGAACCAATATTAAAGGAG	4184
TCGCACGTACAATTGCTCGA	1596	CGATCGTTCGTGTCGCCGGA	924	CTTCACTAAAGTGTATCACG	4184
CTGGACGAACTACCTCTAGA	1595	CGGCCCGTCCACCTGTCAGG	924	CCTTCTAACAGAAAGTAAGA	4184
CAAGCGATACAGGAGTCCCG	1592	GCTTTCACTAGAATGACAAA	924	CAAACCTGCTCTGCGTGCCA	4183
CTGGACGCCTACTATACAGG	1592	GTACTCAATGCTACGATGGA	924	CATTACATTAACAAGTACCA	4182
ACGTAATTTGATGAATTAAA	1591	ACTCATAAAACGATAACGCG	923	CCATGCAGTAAACTATCCGG	4182
TAACGACTACATGTTCTAAA	1588	CAGGATTCTCAGCTATGGCG	923	CTGTCACCCCTTCTTATAGA	4181
CTTGGGGATTTCTTTATGGG	1588	TATTTACTTGGCCTGTCACG	923	TGTGGGACCCTCCAGAGCAG	4181
GGACGCCCCATGTAGTCGGA	1587	TTATAAGCCTCAGTGTCCCA	923	CTTAGGGGATGGCAAAAAAG	4181
GCGGATATCGAGTAACTAGA	1586	CATCCGACCTCCACTCTAGG	923	CGGAGGCCATCGGCACGCGA	4181
CGTTGCTCACGTTCAAGAAA	1586	CCGACGCATACGCAACAACG	923	GCACCCAACTAATATTGCAG	4181
CATCATGTTACGGAGTACCG	1585	CGTTTTTGATAACTGTTACA	923	CTTCCAAGTAAGAATCCAAA	4181
CTGCGTTAAATAATTACACA	1584	ATATTGCTACACTTTTAAGA	923	AATCAAGCAGCTCTTCGGGG	4181
CCTGCTCCCCCTTAGAAGAG	1584	CTGGGAACAGTGGCGCCCAG	923	CTAACGGCAACGCCTTGAAA	4180
ACTATACAATAGGATCTGGA	1584	TGTCAGTATTTAATAAGCGG	923	ACGCCTTTTGCAGATTCAGA	4180
ATTGAAGGTTTGCCACTGGA	1584	GCTTCTGGCCGAGAACGCAG	923	CATCCTCGTATCCTGTGAGA	4180
TCGGGGACAGCCAATCGAAA	1584	CGTGGCAGCATGGAATCGAA	923	CATGGCAGCCCACATTAAGG	4179
CGGGATGATTAATTACGAAA	1583	AGTGTCGCACCACTACCCAG	923	TTACGCAACAGTGAGTCCCG	4179
AAAACTCGTGGTCTGCCGCA	1583	AGGAAACTAGCCCCTAACAA	923	ACGTAAACCGTGGCGTCGCG	4179
ACTTCTCTAGCGCCATGCGG	1583	CGTTACCGCAATGCTTACAG	923	GCTCCTCGAGTCGAGACAAG	4179
CAACATCCCGCCTTGTCGCG	1581	TATTGATATGACTCGCCAGG	923	CTATAGAATCCAAATTAGCG	4179
GCTGGGTTCTTTACACAACG	1581	TGTGATGGATCGCTACCAAA	923	CAGTACCCCGCAATACCGAG	4178
CAGTTAGCACTCTAACGACG	1581	CCACGCTTAACATCGTAAGA	923	AAAAGCGCTGCCTATCGGGG	4177
CGTGCGCCCTGAGATTCAGA	1581	CCACTGATATTCCCTACAGA	923	CGACGTAATCAGATAATGGA	4177
GCACTCACCACTTAATGCGG	1580	CTATCATAACGTGCTATGCG	923	CAGCTGAGCGGGACTCTGGG	4177
CTTTTGCGCCCCAAATGCAG	1580	TTGACCCTCCAACATCAAAA	923	AGATACCTCTCGGAGCCGGG	4177
CCTGTTTCCTCGGTGCACAG	1578	AGACACTTCTTCTTGATGAG	923	CATGTTTGCACGATGCAGGG	4176
CCACGAGCTCATACGCGACA	1578	CATGTGGGCCCCCTATGCAA	923	CAAGATCTAACCCATACACA	4176
ACGTATGCCTGTGTGATCAG	1577	CAGGGTCATAATGAGCCAGA	923	CAAATTACTGACCAACGCCA	4176
CGGTTACCATGGACACTACA	1576	CCAAGACCACACCAATGGCA	923	CTAGTAGTAGATACATGAGA	4176
CCTGTTCTTCTCGCTACGAA	1576	CTGACCATTGTCATGAGGAG	922	TAACAGAAATTATTAAGACG	4176
CTTCGCACAACTATGTACGA	1574	GGGCCCACCCATTCACCACA	922	CGTTATCTCGGTGCACCCCG	4176
CATAAGCGACGGAATATAAA	1574	TCGAATCTCACGACACCAGA	922	TGGATGCGATAGGCTACGGA	4176
CATAGGTTCTCAGATACAAA	1574	CTACTTACTATTGTGTCCCG	922	CCTCCATCACTGGCTTGACA	4176
GATTCTCTATTCTAAAGCAA	1573	AGTCACGACAGTCAACCGGG	922	AGTGGGGCTTCTATACTGGA	4176
GGTGGATACCAGGTGTCAAA	1573	CCGCGGGTAGAGTAAACAAA	922	TCGCAGTCTGCTCCAATCAG	4176
CGGCTCTCAGGTGTGAAGCA	1572	CCGGGGGATGACAAAAGAGG	922	TGATCACAAGGGGTTTGCGA	4175
CAATTGTATTGTTAAATCCG	1571	TATGGACATGCGGTTTAACA	922	CTTATGTGCAACCAAAAAAG	4174
CCTCTTAGAGTCACAACAAG	1570	CATCTAAAACCAAATCTGCG	922	ATGCCATTCTCATTTTTAAA	4174
ATGGCTTCTGAAACGATCCA	1570	CCTTAAGAACAGTCGTTCCA	922	AGTAGTGCTCACCAGATGGA	4174
CCGCCCTCTCCACTGTACAA	1570	GGACACCCTCATAATAACAG	922	GTAGTGCAACTCGTATGCAA	4173
CATTACACCCCCCTTCGCCA	1570	CATAAATCAAACACAATAGG	922	GTAACTCCCCCAGATTAAAG	4173
CGGCCGTCAGGGGAGAGCAG	1569	CAGCACCGACTACCTTCCAG	922	CTATTGGCTACTTTAATGAG	4173
TCGACAGTATCAGATCCCAA	1569	CTATGCTCTTCACCGATCAA	922	ACGGTCTCAGTACCTCAACG	4173
CGTAGTGCTAATCCATGGCA	1567	TTGATAACCGGGTCGCACCA	922	CGAGAGTCTACGACAACCAA	4173
CTACCAATTTGTTTACCGCA	1566	AGTCACGCCCCTCAGACCGA	922	CGTTTCATAATTATACAAAA	4172
TCGGTCTTACAGTTAATAGG	1566	ACAAGTGGAGCCACAACCCA	922	CGGCGAGGAGCAGTTTAAAA	4172
TGGTCACATAATAATTTGAG	1565	CGGTACCCTGTGGTGAAGAG	922	TCTTACGGTTACCCATCAAA	4171
ACTGCGGTATGTACGCTGAG	1564	CTAGTCTGATCCCCACGAGG	922	GTTTTCTGTAGGATTTCCAG	4171
CTACTTAACCTACCGCCACA	1563	TATTGAAAATATATGCCGGA	922	ACACCCCCAACCCTATGAAG	4171
GGTAGTAACGTCACTTTGCA	1563	CTGAGGCAAAACGCTATCCA	922	TTTGCAGCAACCCCGCGACA	4171
ACTGTCGGATTGGAACAGCG	1562	CAAGACTACCAGGTACACCA	922	CGACGCCCAACACCTTTGGA	4171
GTATGACACGGCGCGACACG	1562	CGTTAATCCAGCTCGAACCA	922	ACGCTCAGACATCAGATAGG	4171
AAAGCACGAGGCCCGATAGG	1562	TAGGTCCAAGCCGCGCAAGG	922	CGATAATCCTCCCCTCCCGA	4170
CTTATGGTCCAGGTATCACA	1562	TCGGAGGTATATATGCACGG	922	TGGGTTGATCCTAAACACGA	4170
ACTGTAATTCTTACGCAAAG	1562	AGTTGGCCTTAAACGTCACG	921	CCATCTGCCAAAGCATTCAG	4170
AATTTCATTCTACATTGCAA	1562	CCTTCAATATACCTTAACGG	921	GATCTAATTAGCTAGCAACG	4170
CAACCCAGTCAACAATGCCG	1562	CCTCTATGACACTAGATAAG	921	TAGGTGGCTTACCCTCCCGA	4170
CTACAAACCGGCCATAAAGG	1561	AAGAGACCCATACCAACACG	921	CATAGGCGTGAATTACTCCA	4169
ACTAGGTATTCTAATACAGA	1561	CCAGCAGAAACGCAACCGGA	921	ACGGAAGATGCGTTTCACAA	4169
CTGATCGACTTCATGCCCCG	1561	CAAGTCCATTTACAGACGGG	921	CCTCGAGACTGCTATACGGG	4169
ACAGCTACAATAGCGCTAAA	1559	CCTTAGTGTTTCCTATTACA	921	ACTAGAATATGACTGAAAAA	4169
CTAAATTCAGGAGTATGGCG	1558	CTAATCATAGAAGCACAGGA	921	CCAACAGCAGCCAAGTAAGA	4168
CGGTGGCTACGATAAATACA	1558	TGACCTTAATCTGAAAGCGA	921	TCATAGTGCACCACAAGAAA	4168
TTGTCAAACCCTGCGCCAAG	1557	CTTCGAGACCCCATGTCCAA	921	CCATGATCCGACTATAGGAA	4168
GGAGAGCCCCAAGATAACCG	1556	CGTTATCCCCGGATTCAGAG	921	TAGAGATAATTAGTTTGAAG	4168
GTTACACCTTGGAAAATCAG	1554	CCTGCTTCCTTATCTTTACA	921	CTAAGGCCTAACCTGAGAGA	4167
ATAGTGCTCGAGCTACCACA	1554	ATGCCACTACACTCTTTACA	921	CTGATAGGAAAGCATCACAG	4167
CTAATTCAAACACTGCTAAA	1553	CATTAATGTGATAAGAGACA	921	CAAATATTAACCTATAACCA	4167
CGTACAGTCTGCACTTCGAG	1553	CCGTAGACCTGACTACTACG	921	CAGTACCGTTGGCTTCCCGA	4166
GAACAAAGTTCCGAGTAGCA	1552	AGACGCCTAACCGAAAAGCA	921	CTATATATCACAGAGTCAGG	4166
CTAGTAGACCCCCCTCGCGA	1551	CCAGGACACGAATAACAACG	921	CTTATTCCATCGCCACGCGA	4166
ACACTCTGCCGTTCTCAGAG	1550	CTGCCATAACGTTTATCGAG	921	CCGATGGATCTATCGTCCCG	4165
CATTTCAGACCCTCGATACA	1550	TCAGGATTTCGAATACTCCG	920	CTGCCCTCTATACCGTTGGG	4165
CCACACTAATACCAATTCCA	1550	AAGTTACTCGGCAATATGAA	920	GAAGGTTTATCGACACGGGA	4165
CAGGACTCCGGGCTATGCCG	1549	GTAGTACCCCTGCATTGGCG	920	TATCCACGCGGATCTCACAG	4165
CTTAATTACATACATCAAAG	1548	GAGCATGGTGGTTTGTTCGA	920	CTTGTTGATTATTTGCCCCA	4164
CGTCTGAATGATTCTCGAAA	1547	CCGACAGGAACTCCGCGAGG	920	CATATGTTCTTATTTCCGAA	4164
TCAGAGCTAGGGCTAACACA	1547	CTGGTCTGTTTAGTGCTCCA	920	CCGGGACCCCCTCAACAGCA	4164
CTTAGAAACACCCAGCTAGA	1545	TCACATGAAACGGCGACCGG	920	CAAATCCTCCCAGAATCCAA	4164
CTAGTCGCATACCCACGGCG	1543	CTGAACCTCGATCCTAGCGG	920	CCGCAGGCAGCACCACCCCG	4164
CGGACTAATCGGTATCAAGG	1543	CTGCCTCGCTACAAATGAAA	920	CCGAGAACTCTCACTAGCCG	4164
CAATGCTCATTGATGAAAGA	1541	CGGTTGGCTTCCCAAACCAG	920	CAAGACGATTACATACTAAA	4163
TCTGTATACAACCTTACCAA	1540	CAGGCCGCCCATGAGTAAGA	920	CATTTGGACTCAGCGCTGAG	4163
TCGGGATATAATGATACGCG	1540	ACTGGACCCTGCCAGTAACA	920	ACTGAGGGTCAAAATTACCA	4163
CAGATGGTCTTCGTTCCCGA	1540	AGGCATCACCTCCCTACAAG	920	ATAGGGCATGATTTACACGG	4163
CTAGGCAGTGGCAAAATCCA	1540	CCATACGCTCCCTCATGCAA	920	GAACTAACTCTTAAATTCAG	4162
CCAACTGCCCGCTTACCGAG	1539	ACTAGTGAATGGACATGGGA	920	CAATAATGAACCTAGTGGCA	4162
GCATGAGCAACAATGCCCAA	1539	CAAGGTCACCTTCAAAACGG	920	AAATCCGGAGTGGTGTGCAA	4162
GTGGCTTACTAGCATACCAA	1538	TTGGGCTATTGGCCTCAGCA	920	TTGAGCATACCATTAACCAA	4162
CATATAGCTGCGTTTTGACG	1538	CAAACCACACTATCAAAGGG	920	TAAAAGCCATTCGAGTCCAG	4162
CGTAGACACGACTCACAAGG	1538	ACGTTGTTCCCACCATGCCG	920	CTTAGCGATCGCCAGCAAGA	4161
CATCCCACTCGTGAATCAGA	1537	GTAGTGGATTGGCCAACAGG	920	ACATTACTCACAATGTTAAG	4161
CTATACTTAAACGTAAGAAA	1537	CTGGCATTACCCTCATTAAG	919	CGAACGGACCGAATGCGAGG	4161
TGAAGCGACTCCCTTAAAGG	1537	CAGCGTTGACTAGATCGCGG	919	CTTCCCAGTACATAAATACA	4160
ATGGACCATCACCAATAAAA	1537	ACTGACTCCGCCACAAGCAA	919	TTAGGGATCTACGCTTCCAA	4160
GCTATGACTCCAACTAACCA	1535	ATGGCCTCACACCTAACGGA	919	CGATACCTCCCCAATAGCCA	4160
CTGGTTCCCCGGTATATGCA	1535	CATCGTCTCCGGGATTAAAA	919	TGAACCATAACGACTTCCAA	4160
CCATTTTACCGTTCTTAGAG	1534	CTTGATGCCTGTTTGACGCA	919	TTGGGTCCCAGGCCTAGAGG	4160
TGAAGACTTAAGTAATGAGA	1534	TCGTTGGTTGACCTTTGCAA	919	CCTCTAGTTCTAACAATGAA	4160
CATAGAACAAATCTTCTAGG	1533	AGTGCGGAAACGTTGTACAA	919	CATCGCAAAGAACCGTGGCA	4159
CAGCCGATCCGCCAATTCGG	1532	TCTAGCTCTCTGATTTACAG	919	GTACAACACCCGTTTCAAAG	4159
ATTTAGAGATCCGCAACAGG	1531	TTGCTCACCATACCAAGAGA	919	GAACAAAAACCCCTTTCCCA	4159
CCAGGACCCACCCTGTGAGA	1530	ATGATGTACACTCAGTGCCA	919	CCTGATTTTGGAATGAAAGA	4159
CAGCGGCTTTTGGTACGGGA	1529	TGGGCCGGCAACTAGCTGAG	919	GCATGAGTCGGCTTACACAA	4159
CAGCATACATGATTACCAGA	1528	GAACCTAGCATTCATTTGAA	919	CTAGCAGACATTGCGCACCA	4159
GAAATGCCACACTAACCAGG	1528	CGTGATATCAATCTAAAACA	919	CCAGCCTTAGAGACGCTCAA	4158
TCGGTGCCCATCATGAAGCG	1527	CGGTCCGGTCTCATACCGGA	919	AAGGTTCCCCTCCCAATACA	4158
CATAGACTTAAAAAACCCAA	1527	TATTAACTTACCTAGACCCG	919	CAATACACCATATATATCCG	4158
CTATTTCCTCCCATACCCGA	1526	ACAATTATCCCAATGACAGG	919	TAACCAAGAGAATCGATAAG	4157
CCTTGAACTCAGCCACTGGG	1526	CAACGGGTCTCTACATACCA	919	CGAGCCACTTACTAAATGAG	4157
CTGACCTTCCAGCCATCCGG	1526	AGTCGCCATAACGCACGGCA	919	AGGCCGGTATTTCCTCGGCG	4157
TCACTGCTATTCGCATGCCA	1526	TGGGCAGGAACAACGAACAG	919	GAAACATGTCATTTTACCCA	4157
CGGGAAACATTTTAACTGCA	1525	AGATTCTAACCTTATTCGAG	919	CTATTCCTCGCAACAACACA	4157
CCTTAGTCCCTTGATCACCG	1525	CCTTTTAGCAAGGCACAGGG	919	CCGCGAAGACGTGTGCCAGG	4157
TAATAGGGCACATAGAGCAG	1525	GAGCGATATTTTACTCAAGA	919	CATTTGCGCGCAGAGATAAA	4157
TCTCGGGATAACCAGCAACG	1524	AAACTTGATTAGTTTTAACA	919	CCTCTACTTAATGTATTCCG	4156
ACAATACCCGAGGCTATGAG	1524	CCACGCGATCCAGATAAACA	919	GCTAGTAGTGACTAACCCAG	4156
CATCATGCAATATCGACGAG	1523	AGGCGCCATCGCAATTACCA	919	CCGTTACGATTATCTTTCCA	4156
CCAGCGTTCCCAATGCACAA	1521	CCACATCGAACTAAAAGCAA	919	CATGACACAGAACTAATGAG	4156
TTATAGGTCGGTGTAAACCA	1520	CCTCCCCCTCGATAAAACCG	919	ACATCAACAAAGCTGCGGCA	4156
TCATTACCTACATCGCGGCA	1519	ACGATGACTTTGGTATCAAG	919	CAGGATTATTATCAATGGAG	4156
CGGAACTGTTTGCAGAACAG	1519	TAGGTCAATAGTTAGTCACG	918	CTATAGGCCGTGGAATTGAA	4155
CCAACTTTACGACAGTTCCA	1519	GCGCGACAAGATATTTGGGA	918	GAGGCTACTGATCTACCAAA	4155
CCTTCGCCCCCGCTTCAACA	1518	GCACTTCACACATAGCGGAA	918	ACGCCTCAAAGTACTAAAAA	4155
ATGACTAATACATCGTTAAG	1518	CTGACCCATCCCCCTACGAA	918	ACTCGGGTTTTTCTGTGCAG	4155
CCGAAAACTACCACGATAAG	1517	TTAGCTTGCTTCCCTCAACG	918	TAGGGATCCAAGCCACACCG	4155
AAAGCGCCCACGGTATCAGG	1517	ATTATCTTCCAGTTGTTACG	918	CCTTACCGAAGATTACCCCA	4155
CGGCCCACCCCGTTGTACCG	1516	CCATATTATAGATAGTACCA	918	ACTTACCATAATAAAAGCAG	4154
ATAAGGCGTATACCATGAGG	1516	CGACAAAATCCTCCGTCCAA	918	ACTTAGTTCTTGGAGTTACA	4154
CGTCGTACCTTATTGCCCCG	1515	GTTCATCACCCCACATGCAG	918	CCTCTCCGCATACTTCAAAG	4154
CGACGCCTCCAATTGTTACA	1514	ACATCGACTACTCCACGCGG	918	CCACGTTTTTAACCGTTCCA	4154
TAATTTGACCGATAACGGCG	1514	CAGCTGTATCAGTAATAACG	918	ACGCAGGACTACTATAGCCG	4154
TTACAGTCCGCACTGCACGA	1514	CTACACCTCTCGGATTAGAG	918	ACACGATTTAGATCATTCCA	4153
CCTTGTAGAGCGTAAACACG	1513	CGTATTATTGCACAATAACA	918	AAGTTCACAACGTTACCACA	4153
TATCTAATTGGCGCGTCCGG	1513	GGACCTGAAAGTGAAACCCA	918	TCTAGCTAAGGTCAATCAAG	4153
ACGCGAACCGAGCAACGGAG	1512	CTATACCTCGCACCGAAAGG	918	CTTGCACTTTTCCAAACCGG	4153
CGTAAGGGACCGTAATACCG	1512	ACTGCATCTGCCCTTCACGG	918	CTGAACCCCAATTAAAAGAA	4152
CTGTCCCCACCACTACCCCA	1512	AGAATCAATAGCACTCCGAA	918	AGTAGTAGTATAATATCCGG	4152
CAGCCCAGAAAACATCGCCA	1511	CCGCATCCTCCGTAACCAGG	918	ATAGTTACAAATATGCTGAG	4152
AGAGTCTAAGGGTTTACCAG	1510	CTGCGTAACCCGATTTTAAA	918	CGAGTAACAGCGCAGAAGAA	4151
CCTGACCTACGTAAGACAAG	1510	CAATTGAGCACTTAACGGAA	918	ACTTTTTTTGACCCAAGCCA	4151
GGAAAACTAAAGATTCAACG	1510	CAGGTACATCACTTGATAAA	918	CTTACGTGTTTGCAACGCAG	4151
GGGTTGCCCAAGCCGCACGA	1509	TCTACTGCTTAGTCGCACGA	918	TCTTACACTTTCTAGTAAAG	4150
ACATAAATTCGCTAGTGAGA	1509	CGAAGCCGTACCTCACTAGA	918	ACTTGATATCAGTTGTCGAG	4150
ACTATTCCAGTCTTAACACA	1508	GCGAGGTCTGAATCTTCCCA	918	GTTACGTGCCAAGTTTACGA	4150
ATAATAATATACCAAATCCG	1508	CATGCCTCACCGAAGTTAAG	917	CTACCCAAATCCAATCCCAA	4149
TAACACCCAGGTCTAACCCA	1508	CTAGGTAATCGCCAACGCAG	917	CGTATTAGACAACAGTCAGA	4149
CAACGACAACCGGAGACAAG	1507	CCGAAATTCCATTAACTGAA	917	GCGGATCAATAACAGTACAG	4148
AGGAGTCCCCAAGCGAGGAG	1506	CGGAATTGTGAACTGCCAAA	917	GCACCGCAAGATAAAATAGG	4148
CTTGTGGGCCCGAAAACACA	1506	CTGAGTATCGGCTCATCGAG	917	CGAGTTTGCTCGGCGAACAA	4148
CCTCAACTTAATAATCCAGG	1505	TTGTGAAACAGTACGTAGAA	917	TTGGACGAATTGCTATGAGG	4148
CGTGGGGAAGGACAGTGGCG	1504	CCATACCGCCGCCAGCCCAG	917	GTAACTCAAGTTTCAACGCG	4147
TCTGTGTGCAGCTTATCCAG	1504	AAAGGAGGCACGGCTATGAA	917	CAATCGGGAGTTCCTAACAA	4147
CAGTCCGCAATAGCAAGAGA	1502	CCACGGCTTAAACATCAGCA	917	ACGGGTTGAACCAAATAACA	4147
CCGCACGCAACTCTATCACA	1501	CTGATTCTCTGACAAACGAG	917	GTAGCGTCCCACGTTTTCAA	4147
CAGAAATTTCAGATAACGCG	1501	TATCTGTCTTCAATGAACCA	917	AAGTCATCCACGCTACGGGG	4146
GAACTCAAACTGTAACGGGG	1500	CTACTTAGTGGACCTCTAAA	917	GCTGTAGACCTTGAATCAAA	4146
CAACATGTTCTCGTACTCCA	1499	TCTTAGTTTAATGTATCGAA	917	CGGCACCCCTAGCATAGCGA	4146
TTAGCCTGTCTAAATTGAAA	1499	CGAGGCTCATGGCAGATCGA	917	CAATATCAAGGGATGAAACA	4146
TTACGTACCCCTGTATACAG	1497	ATGTAGGATCGCGAACCCCG	917	CCACAGGATCTAGAAAGCAA	4146
CCTGAAATAGCTACAACAAA	1496	AAGGTATACCATTCACAACA	917	CTTTACGATCTTCATCTACG	4146
CAGTATGTCAGACAACCAAG	1495	ACATTGGGCGCCCAGCACCA	917	CATCCGATCTTTAAATTCAG	4145
AGTCACGCCCCTCAGACCGA	1495	CAGCTAAGTCGTTTACACAA	917	CCACTAAGTAATCCTTGGGA	4145
CAACCCGTTCCCACTTGCCA	1495	ACTGACCTCAAGACTCCACA	917	TATACCTTTCCCACGTCCAA	4144
AATACTCCCACCCTTTGGCA	1495	CAACATACTCAGTAATAACG	917	CCGGCTGGTCCCCCAAAAAG	4144
TGTGTTGTATATCAATACAA	1495	CTTGCAACATAGTTGCACCG	917	CAGTCCTCTGTTTTATTCCA	4143
CCAGCGTCCATGACTCCGAG	1493	ATATGTCGCGACACATCCAA	917	GTACTGCACCTTTCTTCCCG	4143
GATCCCAGAGCGTAGTACCA	1492	CCTCACGAAAACCAGCCAAA	917	CTAGCTACAATTCTACAAAG	4143
ACTAGTGCCAAAGAAACGGG	1492	CCGTTGCAAACAGCATTCCA	916	CTAGGTCACTCTCAATCAAG	4142
CCAAACACTCATTCGCTGAA	1491	AGTGCTATTATCCCAAAAGA	916	CGTAGCCAATAGCTTACCAA	4142
GTATGTCCCGAGAATCCACA	1490	CGGGATTGATAAGAGATCCG	916	CAAATTATACCTTAGATGAG	4142
CGTACTGGCAACATACCACA	1489	CGAATGGACCGTCAGCTAAA	916	GGAAGTAGTCAGCAGTGAAG	4142
GCATCTATTTACGATCACGG	1489	CTGATCTCATGAACTACCAA	916	ACGTGCTCTGCCTATCAACA	4142
GTGGTCTAAGAAATAAACCA	1489	CATAGAATCCTCGCTCTACG	916	GAACCCCTTACGTAACACCA	4141
CTGTCTTCACAGCCTTTGCA	1488	CTGTTACATCGATAGACCCG	916	CTTCACAGCTTGGTGCAGAA	4140
CTGTCCGAAACTATAATCGG	1488	TTGGGGCCCACTGCATTGGA	916	GGTTAGATCTTGGCGCCGGG	4139
CGGTTTTGCAAAGCTACACA	1487	CTACCTCTCCAGCCGACCAG	916	GCATACCATATTCCACAGAA	4139
AGTGACCATAACGATAACAG	1487	ACTCTTAACGCAGCTTGGGA	916	GGTAATTTAGAGGCGTACCG	4138
TTTGCTCCCCTGGATCCAAA	1486	CGTGTTGCAATTTAATCAAA	916	CTTCCTTTACCCAATTCAGA	4138
TATCCGAGAACGAATAACAG	1486	CAACAAGTTAACCTGCAGAG	916	TAGCAGGTCCCGATTTCCAA	4138
ATACACTTTTAACCACACCG	1484	TAGTTGGATACTCTTCCGGA	916	AAGTGCAATCATACGTAGAG	4138
TAGCTGCACGACAAACCGCA	1484	CTAACGTATTAGTCAACACA	916	CGAAAAACATACCAGTAACG	4138
CCTTGAACAGACTTAATCGG	1484	GGAACCGTACACCTTTGACA	916	CCTTCATACCTCGTGTCAGA	4137
CATAAACTCCACCCGTACAG	1484	CGTTCATCAACAGAACCCCG	916	CTTCAAGCCGTTATTTACAA	4137
CCGTCATCCCAAATACTAAA	1483	CCACTGTCCTGTACTCCGAA	916	GGTCGGTCAGGACTGAGACG	4137
ATTTATACAGGTATGACGGG	1482	TATGCATTTGCCACAAGGGG	916	CTACGTGATTCGCCATTAAA	4137
CTGACCGTCAATACTAACCA	1481	GCGTGTGTTGGACATACCCG	916	TATAGCTAACCTCCACGAAG	4137
CCGCTGACTAGACCGACCGA	1481	ACAAACAGTAAAGCGCTCGA	915	TGTCCGATTAGTCTTACAAG	4137
CCGGCCGTAAGCCATACCAG	1481	TGATAACCTTGGGAGTAAGA	915	CCGTACTGTTAATTAAGAAA	4137
CAATACAACGCACATACCGG	1481	CAGGTACCCTTCCATTTCGA	915	CCTAAAGTACACACGCTCGA	4137
GTTGATGCAAAGACACGGCA	1481	GGACCCGTACAATCTCCAGA	915	CTTATGTCCCTACAATCGGA	4136
TCTGATTCTTCGAAAATACA	1481	CTGGAACGTTTTAATTAACA	915	TTTCCGTAAAGTCCTTCGAG	4136
CATTACAACCAACCTATACG	1481	AGTCCCAAAAACCTTCAGAA	915	CAGACATTTTCCATTTGGAA	4136
ACAGAAGCCTAGTATACCCA	1480	CAGTCTAAACATTCGATAGA	915	CTGTTATAAACTGAACGAAG	4136
CCAACTCTCTAAACACTCAG	1480	ACGGGATTTGACTTGCTACA	915	CCATCTACAGCGTTGCCGGG	4136
TCATTCGGCACTGCAATCCG	1479	CGGGCACTTCGGTTTAGGGA	915	CTGATATCTTTCGTAAAAAG	4136
CCGCCTAAAAATGCGTCCAA	1479	GGTAATCCATGCGATACCAA	915	CGGGCTCCATTCGCGCTGCA	4135
CCGGTCCACTTCGCACAGAA	1478	CTAGGCAATGCTCTTCTACG	915	GCAACTTGTCGTGCGCCCAG	4135
TCTGAATCTTCGGTTCACCG	1478	CCACCTATCCTGGTAATAGA	915	CCGTATTCTTTGCAATTAGG	4135
TGTCAACCAATTCCTCACCG	1478	CTGCGTTGTCCAGTGTCCGA	915	CCAGGGAGATTGACGACGCA	4134
TGAATCCCCCCCAAATCCAA	1478	CAGGGTCATGACCAATCAAG	915	ACGGGACTAACAATTCAAAG	4134
TCTTCTTTCTTACCTAGCGA	1477	GCGACGTGTCCACTGAACAG	915	CAGGTCCCAGCCAAACTAAG	4134
GCTTGGGCACCAACATCAGA	1477	CCTAACCCACATCAATTGAG	915	CGTTCTCAATGCTTGCCGGA	4133
ACGTTGAAAAGGACGCTCCA	1476	TAGGCGTACAAGGAATAGGA	915	TAAAGACCCATACAACCCGG	4133
TAATTAACAACCGTGCCACA	1476	CCTGATCATCGCCATTGAAA	915	CCTTTCGATCTACAGTCAAG	4133
CCTTTGCGAAGATTGTGCAA	1475	GTGGTGTTTGTAAAGTAACA	915	ACTAACCCTTAGTAACAGAG	4133
CGTCCCTACTACCTTACAAG	1474	ACGGCGTATACGAATATGGG	915	CTACAGCAACACTTACAGAA	4133
CAATGCGAACTGCTAATAGG	1474	CTGACCCCATGCAAGCAGGA	915	CTTACACGACTACCATTCGA	4133
ACTCTGCGTTAACCATGAGG	1474	CAAATAACCTTAAAACAACA	915	CTATAGACAGACCCTTGACA	4132
CCATGTCACTGCAAACTCCA	1473	AATAAGAAACTCCCTAGCAA	915	CCGTGTACTTCAGCATAGGA	4132
GCGTGATCACAGGTGATCAG	1473	CGATTGCTTCCGCAACAAGG	915	TCTTAGACTTGTATAACACA	4132
GAACGCGCTAGAAAGTGGGG	1473	CTAGGATCACCTTATCAGAG	915	CCGGGTCATCTGGAGTTCGA	4132
CAATGGTTTACTACTTACGG	1473	CATGAGTTAACAGAATTCGA	915	ATAATGGATACCTAAATGCG	4132
CTACCCCTCGTATATCGGGA	1472	ACGTCCCTTATAATACCACG	915	AAACACCTCGAAATATACGG	4132
CATTACTGCCACCCTCAGAG	1472	CCTCCTAGAACAGATTAACG	915	GCGGTAGTACGTTCAAGAGA	4132
CCAGGCCACCTCTTATCGAG	1470	TCAGGGTTAACAGTGCGGGA	915	CCGGACTTCCACCTGACCCG	4131
GCATCCTGAGAGTAACGGAA	1470	CTACATACCACGTCACAACA	915	GCACCTACTAAGCCTATACA	4131
CCAGGACACATTACTCAACA	1467	GCTCTGCCAGGGATTAGGGA	915	ACTGGAAACCGATATCACGA	4131
ACGGCTTCACATCATTTAAG	1467	GTTGCAATACCACTGTCCCG	915	CTAGGGTACATAACAATGCG	4130
CAAGAACCAGACATAACCCG	1466	CTGGGGGATCCTAAACTGGA	915	CCGATCCGATACCCGCAGAG	4130
ATTGCCCTAACAGATACACG	1466	ACAGCTTATCATGCACAAAA	915	CATAGCCCTCGACCTTCACA	4130
CCAAGACCTACATCGAAGCA	1465	CCAGTCTGCAGATAGAAACA	915	ATGTCCACTACTGCATTGAG	4130
CCTCTCCGTGAGTATCTAAG	1465	AGGGACACATGGTAACACAA	915	CCTAGCGCAGCGCAGATCCG	4129
CGAAATCACAATCTATGCGA	1465	CCTTATGATATATTGTACCG	915	CCTGAAAACATATTAAAAAA	4129
CCGCAGGAAGTCCAGTAACA	1464	CTTTAACATTCCGTAATGGA	914	CTAGCCTAAATGATTTTGGG	4129
TAGCGGCGACTTAAGCAACG	1463	GGATATGCAGATTCAACGCG	914	CTAAAAGTTTACTCACTGAA	4129
TAAATGTGCTTGACACGGCG	1463	CTGACTGACCACTCAACAAA	914	CTTACTGAATAACCAAGCGA	4128
CATAAAACAGCAATGAGCAA	1463	CTGTTTCAACATGTGTTGGG	914	CGACCATCCAAACATTTACG	4128
ACGGCGGGAGCGACAATGAA	1463	CCTCCGCGACTAACTAAGAG	914	CAGTGACAATACCAGTGGCA	4128
CCGAGTCTTTAATTGTTACG	1461	CAAATTTCACCGTCTAAGCG	914	AAAAGTACCGGCTAGTGCAA	4128
GTTCTACACAACCTGCTGGA	1460	CAAATACGTCGGTCAAAGGG	914	TTATAACCAAAAAATTAACG	4128
CGTTGATCATTTACTTCGGA	1460	ACAACGAATCTAACTCAACA	914	GTTGTATCCTTACTACTCGG	4127
CAGGTTGTTTTCGTACTCCA	1459	GAGCATAAATGTTATAGCGA	914	CCGCATGGAGTCACATGAAG	4126
CCTGAATCTTCCGTATCAGG	1459	CGTGGGCGCATTTATCAGCG	914	CGGAATGACGCAAATTGGAA	4126
TGAATGATCTACTAATGAAG	1458	CTACCAAGCTAATTAATCGA	914	CTTCCTTGTCCCGATTAGGA	4126
CGGTACACTAGCAAACTGCG	1458	CATACAACAGCCCCGTCCGA	914	CATCAGTTTCAACCTCACGG	4126
ACATGCGAACTTTCTCGGAA	1458	CTACCCAAACGAGAGCAAGA	914	TAGCTGCATGACTCTCTGAG	4125
ACTGGTACCCACATGACAAA	1457	CCGTAATGTGTCCTACCCAA	914	CTATCTACCTGTCTTCTAAA	4125
TTACTACCCACGCTTATAGG	1456	CCGTACTGTTAATTAAGAAA	914	GCAGACCTTTGATCTTCAAG	4125
CTGAACGATTGTATGTGGAA	1456	GGAGCTTGCTTTAAAATGCA	914	CTGACTATACGGTAAAGACA	4125
CTAGTATGTACTAAGATCCG	1456	GGAAGGCTACCTGAACCAAG	914	CAAACTGTAAGCGCACAGAA	4125
CAGCCTCTCATGGAGCCGGG	1455	CAAAAGATTTCCACGCACAG	914	CATAGCAGCATATCTCTGGG	4125
CCGGCTGAACGGGTGAAGCG	1455	CCTAATACCAACCATCGACA	914	CGTACCGTCATGTTGAAAGA	4124
CGAGGTGTAACGCAGACCGA	1454	CCGCGGACCTACCTTACAGG	914	CCTTGTTGAGACGAACCACA	4124
CCTAGAACCCATTCGACGAG	1453	TTAACCGCAAGCACAAGGAG	914	CTTTACCCTATGACGCCAAA	4124
CCTCAAGTCTAATCTTCAAG	1453	AGTGGGGATAATGTTCTCGA	914	TAAACAAATCCTGAGAGAAG	4124
AAGCTCATCGGGAATTACCG	1453	ATGGAGGTTGTACATTTAAA	914	ATAGCAGTAACCTTACGGAG	4124
[truncated: 63,536 more rows]
