# Supplementary material for: Circular synthesized CRISPR/Cas gRNAs for functional interrogations in the coding and noncoding genome
Source: eLife journal article supplement (doi:10.7554/elife.42549), 2019-03-06
Supplement: supp [file elife-42549-supp-v1.zip › elife_poa_e42549_Supplementary_File_22.xlsx]

## Sheet: Sheet1
guide	sequence	counts
gRNA_Non-Targeting_Control_8	ATCTGCCATGGCGTCCTGGC	12593
gRNA_USP2_2	ATAGCTACCGGATAGACCCC	18476
gRNA_USP50_3	GTGAGAAAGTATTCCACCAG	4631
gRNA_USP1_2	TGGTATTAACAGCATAGAGA	2159
gRNA_OTUB1_2	CAGACACAGCCTTGAACCTG	11502
gRNA_USP18_1	AAGATCTGCCGGGGACTGCG	27077
gRNA_USP2_1	GCTGAGACCCGACATCACTG	10763
gRNA_USP21_2	AGGACCGGGCGGATATCATG	14594
gRNA_USP47_1	CTTGGCTGGACCCATAAGGT	19885
gRNA_VCPIP1_1	GTGTAGCACTACGTCCGGGT	8396
gRNA_USP17L17_3	GCATAGAGGACATAGACAAG	6889
gRNA_USP19_3	GAGCGAGGCGGGCATAAGTG	11347
gRNA_USP12_1	CAGCACACCAGACCCAACGT	19268
gRNA_USP43_2	AAGTACGGCTCTCAGTTCCA	19875
gRNA_USP17L15_3	GACAGAAGTGATGCTAGAGG	1889
gRNA_USP35_1	AGAACTCGGCGAAGACGTCG	6807
gRNA_USP11_2	TGATAGGCAGTGGAACACTG	11239
gRNA_CYLD_2	ATATTCAAGATCGTTCTGTG	17593
gRNA_YOD1_1	GCGGAGCCGCCACATCGTGT	6944
gRNA_USP17L27_1	AGCCCAGCCCCCACCGCAGC	1203
gRNA_Non-Targeting_Control_25	CATTAAACCTTGCCCCACAA	14113
gRNA_USP35_3	CATCCATGAGCTCCAATGGG	19880
gRNA_USP16_1	AAGGAAAGATTCATGAACCA	5745
gRNA_USP17L2_2	ACACGGGCCTCAGATGAGAG	19062
gRNA_USP17L5_3	GTGTAAAGTTAACGTCTTGG	2791
gRNA_USP32_1	GAATGCACATGACACCACAA	6790
gRNA_Non-Targeting_Control_6	ATAGCCGCCGCTCATTACTT	29754
gRNA_OTUD7B_2	TAGGAGGCCCATAGTCGTCG	23464
gRNA_USP8_2	GTATTTCATATATAGTACAT	1450
gRNA_USP33_3	TCATCAAATACGGCAACCAG	6681
gRNA_Non-Targeting_Control_17	AGTTCCCAGAAATATATTGC	12219
gRNA_USP33_1	AACAGTCGACTTAAACAACC	5487
gRNA_TNFAIP3_1	CCACTTGTTAACAGAGACCG	15950
gRNA_JOSD2_2	CTGCCGTTCGTGGTACACGG	24904
gRNA_OTUD6B_3	GCGCTAGAAGAAACCTGCAC	14862
gRNA_ATXN3_1	TCAACAGTCCAGAGTATCAG	16611
gRNA_JOSD2_3	AGGATCAGCCCCAGTACCTG	8908
gRNA_USP45_2	GACGTGACTCAGAATTCATG	18765
gRNA_JOSD1_1	TCTACCATGAGAAACAGCGC	5948
gRNA_USP6_2	TATACTCCGAATAGGCCAGG	14866
gRNA_USP51_1	CACAGACCAGACACAAGCTG	12058
gRNA_OTUD7B_3	TAGTGTAATTCTGTCCCTAG	9366
gRNA_FAM63A_1	AGTCATCCCTGAAAACCATG	5071
gRNA_USP1_3	GAAGTTAAACCCATAAACAA	1351
gRNA_USP9X_3	TCATGGCGATAAAACACATG	4910
gRNA_USP14_3	TCATGTAACAAGTGTTACCA	24846
gRNA_JOSD1_2	TGAAGCCCATGACGTTAGTG	13599
gRNA_VCPIP1_2	CAGTCTGATGCAATATAGTG	6657
gRNA_Non-Targeting_Control_20	CGGAGTTAACCTGGAACCTT	54645
gRNA_USP17L20_2	CCAAGTGCTCGTCCAACTCG	9332
gRNA_USP17L11_1	TGCCAACTACATGCTGTCCC	1601
gRNA_Non-Targeting_Control_5	TTAACTCGAACGCTCGAAAG	9844
gRNA_USP17L19_1	ACACGTTTGAGAGTGCTCCC	2659
gRNA_OTUD6A_1	TGCGCCGCCACCAACGCGAG	8309
gRNA_PSMD14_2	AGCCTTGTCGGAGAGAGCTG	2496
gRNA_USP27X_1	TAAACCGATCGTAAAGCTGG	8033
gRNA_FAM63B_1	TAGCTGCGAGTTCAATAGTG	12783
gRNA_USP17L26_1	TAGCAGGAGACCTGCTGCGG	1346
gRNA_USP17L29_2	TGACGTGGCCAGGATTGTGG	10861
gRNA_USP49_2	GGCGGCGCGAGGTGAAACGG	17024
gRNA_USP17L3_1	AACTTTACACACTTCTGCCA	4404
gRNA_USP17L15_2	ACATGTATAGCTTCATGTCA	13291
gRNA_PAN2_3	CTGTGAAAAGTACCAGCCCA	20576
gRNA_ZRANB1_3	GAGTCCCGCTTCGTAGCAGG	3366
gRNA_Non-Targeting_Control_18	CCAAAAAGATGAATATCTCG	16018
gRNA_Non-Targeting_Control_29	GGTGCGGTCTGCTTGTAGAT	21185
gRNA_COPS6_2	CAAGGAATATTATTACACCA	4951
gRNA_USP44_2	TGGTTTGAACAATCACCCAT	11567
gRNA_COPS5_1	AGCAGCCTGAGCATTTACTC	4965
gRNA_STAMBP_3	CCAGAGCGGAAGTACCGACG	11926
gRNA_USP17L10_3	GGTCTCCTGCTACTCAGAGG	8100
gRNA_USP42_2	GGACGCAAAGGGGATGATCG	13471
gRNA_YOD1_3	GAGGATTCGCTGACCGCCGG	5050
gRNA_USP28_3	CTGAAGAGGATACTGGCCGA	246674
gRNA_TNFAIP3_2	TATGCCATGAGTGCTCAGAG	11018
gRNA_USP28_2	AGAAGTGGAAGCCCTATCTG	88273
gRNA_USP49_1	CACCAAACAGGTCTTAAAGG	17949
gRNA_USP1_1	GGCGACTGCTTAACACACTG	1917
gRNA_USP7_1	AGATGTATGATCCCAAAACG	3236
gRNA_USP11_1	GGTCTCCATGATGATCAACT	11682
gRNA_Non-Targeting_Control_27	TAAAGCAGAAGAATATACAG	2781
gRNA_STAMBPL1_1	CCAGACCTAAAGTAACGTCG	14377
gRNA_USP20_2	CTCACCCTTTAACTCATCAG	14451
gRNA_USP25_3	GAGACTGAAAGATTACCTCA	7357
gRNA_USP36_3	GATCTGGAATCACACTCGGG	7311
gRNA_USP11_3	GTGGGCGAGAACGTCCACTG	29872
gRNA_OTUD4_1	TCTTCAATACAGGAATGGGT	4978
gRNA_USP17L4_1	AGTGTGTAAAGTTAACGTGT	13093
gRNA_Non-Targeting_Control_22	ATCGTTGCTGACAGGATCTA	22911
gRNA_OTUD1_1	GCTCTTCGCCCCACGGACCG	14058
gRNA_USP18_2	ATGACCATGAGGGTAGTCCC	30646
gRNA_USP17L7_1	ACACGTTTGAGAGTCCTCCC	16190
gRNA_FAM188B_2	AAGTCTGGTCTGATTGTGCG	9840
gRNA_USP34_3	TTGTATCTTTGGGTGCACCA	36978
gRNA_MPND_3	ACAAGAGTCGGAGACCACTG	4606
gRNA_USP17L18_2	CCTTGTTCCAGTCGACATGG	8109
gRNA_OTUD7A_1	TATGGGCTAGGACAAAAACG	17574
gRNA_USP17L1_1	TCAAAGCTCAAGAAGTCCAG	6670
gRNA_ZC3H12A_1	CAGCTCCCTCTAGTCCCGCG	6849
gRNA_USP17L5_1	TAGACGAGAGGTCCTGTGTT	23291
gRNA_USP17L28_2	ACACGGGTCTCACATGAGAG	13894
gRNA_USP7_3	GGCAGTAGAACAGCTCGATG	4044
gRNA_USP17L8_1	GTACAGAGCATGCAGCACTT	23845
gRNA_Non-Targeting_Control_16	CAGGTTTGCACGCATAGCTA	37611
gRNA_USP50_2	AGGGAGCATTCATATTTGGA	18366
gRNA_Non-Targeting_Control_37	GCGAATGCCTGAAAGTATAA	3506
gRNA_Non-Targeting_Control_33	CGCTAGGTTATTTCGTGGCC	21316
gRNA_Non-Targeting_Control_1	AAAACATCGACCGAAAGCGT	543926
gRNA_Non-Targeting_Control_32	GAGTCGAAGATGGTCTAGGA	16433
gRNA_OTUD3_3	GCTCTTGGTGATCAATTGGA	25866
gRNA_OTUD6A_2	CCAAGACGTGGCCCGCATGG	26615
gRNA_USP15_3	AAGGTGTTCCTTAAGTGACT	7168
gRNA_USP28_1	AAAATGTTGGCAATACATGT	77700
gRNA_FAM188B2_1	TCACTTACTATGTTTCAGAG	9000
gRNA_USP39_1	GAACATCAAACGTCCTCCAG	3274
gRNA_USP14_1	TACAGGATGCTAATGAATGT	26988
gRNA_OTUD3_2	GTGACCTACCTGCCACAAAG	7256
gRNA_OTULIN_3	TGAACTATTCACAAATGAGG	2873
gRNA_USP10_1	ACTGACCAAAATCAGCCCCG	5982
gRNA_USP19_1	GAGGAATGACTCTTTCATCG	10825
gRNA_ATXN3L_2	ATCGAGCCAAGAAATTTGCA	20416
gRNA_OTULIN_1	ACCACGGACTCGCCGTATGG	16035
gRNA_USP48_1	TGAGATGCGTAAGCAAAGTG	11454
gRNA_Non-Targeting_Control_24	GTGCGTGAGTATTAACGCTC	14775
gRNA_USP34_2	TCATATACCACGATTAACAG	9630
gRNA_USP4_3	CAGCTGGGACATGTACAATG	28228
gRNA_OTUD7A_2	TCTCTGTTCCATGGACACAA	8081
gRNA_Non-Targeting_Control_26	CTATATTGTCGCGCAGTGGA	17064
gRNA_Non-Targeting_Control_2	CAAACAGTCTAAGGCGACGA	26316
gRNA_STAMBPL1_3	GTTAAGGCCCTGTTTACAGG	15168
gRNA_Non-Targeting_Control_9	GTCCTCATCCGGTCAGGCTG	23721
gRNA_OTUD1_2	GCGGTGGACGTGTAGTGCGG	14618
gRNA_USP37_3	ACTCCAAATTAGTAATAACA	1354
gRNA_USP54_2	AAGGTTTACCTAAAGCACCA	3560
gRNA_CYLD_1	AAAGGCCTCCAAATAGACGT	10483
gRNA_USP47_3	CCATAAATGAGAGTCTGCAA	10931
gRNA_USP25_1	TGTGATGGTATGGAACCACT	15647
gRNA_USP39_2	ACTGCCTGAAGCATCTCATG	3491
gRNA_USP17L22_3	TCAAACGTGTCATCGTCACA	1196
gRNA_Non-Targeting_Control_7	TTGTACGGTACTGGCTTTGT	38197
gRNA_ATXN3_3	CGAGTGTTAGAAGCAAATGA	28106
gRNA_OTUD6B_1	AAAGGATTGTGCTCTGACTG	7009
gRNA_UCHL5_3	GAATTAGATGGATTAAGAGA	5290
gRNA_USP12_2	TTGCGTATAAGAGTCAACCT	8768
gRNA_FAM63A_3	GTCAAGTGGATCCCTTGGAA	10496
gRNA_USP17L12_2	GAGTAAAGTTAACATCTTGG	12559
gRNA_USP45_1	AATGAATGGATCTTTCACCG	10383
gRNA_OTUB2_1	AGTGCCGGAAGAAGTCTGCT	19972
gRNA_USP35_2	TCAAGGAGGACTCGAACTCG	15120
gRNA_UCHL1_2	ACAGGCAGCCCATGATGCCG	15474
gRNA_MPND_1	AGTCTGACCTGGCCAAGTCG	9791
gRNA_USP34_1	GTCTTGTATCACACGAACTG	21412
gRNA_USP17L17_1	AATCTTGTTGCCTGTCACAT	18334
gRNA_USP17L28_3	GCATAGAGGACATAGACGAG	3664
gRNA_USP26_2	ATAGTGACGGTTACACAAAG	9494
gRNA_USP42_3	TCTCATTTATAGGCTAGCAA	10359
gRNA_OTUD4_3	GAACAGAGAGAAATTTGAAG	2119
gRNA_BAP1_1	GTCCATCAAGACTAGCAGCG	9865
gRNA_USP18_3	TCAGGTGTTCGTAATGAATG	5025
gRNA_USP17L22_1	AGTGAACATGAGAAATTCAT	5565
gRNA_USP17L25_3	GAGGGCTGGATGACGTGGCC	23164
gRNA_Non-Targeting_Control_19	TGCCGTTAGCATGCGATCCC	17890
gRNA_USP27X_3	CGGGACTCGGCATCTCACAT	35692
gRNA_USP26_3	GAAGCCTAAAAGTGAATTTG	13755
gRNA_TNFAIP3_3	CTTGTGGCGCTGAAAACGAA	12951
gRNA_UCHL1_3	CGCCCTACCTGGGCCGTGAG	19830
gRNA_MPND_2	CTGACACGGAGTGAGGTCGT	28836
gRNA_PAN2_1	GTTCCACCTTAAAAGTACGG	5501
gRNA_OTUD7A_3	CAGAAAAGCGGCTTTCCCGG	4669
gRNA_USP51_2	TTGATGAGAAACATCTGTTG	12377
gRNA_USP17L24_3	AGCAGGTATTTCCCATATTC	8364
gRNA_USP5_2	GGAGAAGTTTGAATTAGACG	8566
gRNA_USP24_1	AGACACGGACAACTGTCGGT	7937
gRNA_OTUB1_3	GTAGACCACAAGGTAGTCGG	10579
gRNA_USP22_1	CCTCGAACTGCACCATAGGT	11655
gRNA_USP49_3	CGTGCTCAATGATAACCCAG	11044
gRNA_USP24_2	GTTTAATCCTACCTGTACCA	7472
gRNA_USP9X_2	ACAAGTGCTATATCTAACAG	4988
gRNA_USP17L30_2	CGTGGACCAGCACAGCATAG	10205
gRNA_ZC3H12A_3	CAGGACGCTGTGGATCTCCG	14566
gRNA_USP43_1	CACACCACTGACCTGTACAG	10605
gRNA_USP6_3	TCTCCGGAACCTGATTGACG	15706
gRNA_USP17L5_2	GCCAGCAGCCAATGCCTGTG	15689
gRNA_OTUD5_3	CGGCGCAGGCTACAACAGTG	14674
gRNA_MYSM1_3	ATGGTGTTATCCAAGGTCCA	3787
gRNA_USP17L11_3	GTGTTCGTCTGAGACATGTA	1237
gRNA_USP17L8_2	GGAGAGAATGCCTATCCTTG	24913
gRNA_USP30_1	TAAATCAGTACATACCCATG	6106
gRNA_USP17L7_3	CTTCCATAGAGGTGAGCAGG	41033
gRNA_USP37_2	AATGTGGTGCTTCGACCCAG	1492
gRNA_USP17L29_3	ATTGTGGTGTTTGTCTCCAG	139
gRNA_UCHL5_2	GTTACTGAACTGTACCCACC	7088
gRNA_Non-Targeting_Control_13	AAGCCATTGTATAACTCCAG	18315
gRNA_USP5_3	ATGGATGCAGCCCTTAACAA	5963
gRNA_USP46_3	TGTATGCCAACACATTCTCC	19878
gRNA_USP29_2	TACATTTAGTAGGCTCTCCA	9010
gRNA_USP17L12_1	TACATGTCTCAGCCGAACAC	2550
gRNA_USP29_3	TGGTTCAACGGGTAGAACCA	11034
gRNA_USP17L22_2	TACATGTCTCAGCAGAACAC	6424
gRNA_FAM188B_3	ATACGGCATAGTGCAGAACA	18105
gRNA_USP14_2	GCCTGCCAGACAGAAAGTTA	21834
gRNA_USP47_2	TGATCGAATGACATTTCCCG	5901
gRNA_USP3_3	GTTGTCACGGCTATATTCGG	10788
gRNA_USP32_2	GGAAAGAATGCTCCACGTGG	8384
gRNA_Non-Targeting_Control_12	CACTGCAGTATTCGTGGCCT	24314
gRNA_COPS5_2	GATGGGTCTGATGCTAGGAA	5526
gRNA_USP42_1	AAATATCTGACAAACAAGAG	4342
gRNA_USP3_2	CTACACTTGGAACTTCAGGG	5804
gRNA_ZC3H12A_2	GGAGTGGAAGCGCTTCATCG	13685
gRNA_BAP1_3	CACGGACGTATCATCCACCA	22078
gRNA_USP17L7_2	CAAAGGTGTCTGAAACGCCG	21850
gRNA_STAMBPL1_2	AAGAAGCAAGAGTTAGCCCG	5095
gRNA_USP15_1	CCAAGTTACTTAGGCCACAG	29470
gRNA_USP36_1	CAGGTTGGATCGTCAAACGC	15605
gRNA_FAM188B3_2	TGGTTGCCTTCATGATTCTG	20292
gRNA_Non-Targeting_Control_14	AAGAATTAGGCACGGTTACT	37294
gRNA_ZRANB1_2	CAGCAAGCGTACTTCATCTG	17363
gRNA_Non-Targeting_Control_15	TAGACAACCGCGGAGAATGC	20523
gRNA_USP40_3	TCGAGCTAATCCAAGATATG	7679
gRNA_FAM188A_3	CCATATACAGGATCTATCAA	14835
gRNA_OTUD6B_2	TGCTTGAGAATCAGCCACCT	11237
gRNA_USP17L20_1	GATGCTAGAGGCGGTGACCT	3810
gRNA_UCHL3_3	GGTCTCATGAGTAACTCGGA	2395
gRNA_BRCC3_1	GAGCGTGGTTGAGACAAACG	11350
gRNA_USP50_1	CCTATCTGATGACAGACATG	25305
gRNA_USP12_3	CTTGTGATGAACTTCTTAGG	29900
gRNA_USP17L20_3	CGTCCAACTCGGGGGCCTGG	10426
gRNA_USP38_2	GAAGCCTCAAAGAATATCCG	7087
gRNA_Non-Targeting_Control_35	CGACAACGTGCAGGTGTATC	19012
gRNA_USP17L1_2	GCAGGTAGATCATCACTGCA	27236
gRNA_USP17L19_2	TACATGTCTCAGACGAACAC	6546
gRNA_USP54_1	ACTGACCACAGACTCATGGT	10503
gRNA_FAM188A_1	GCTGTTTCTAATGTATGGGA	6354
gRNA_OTUD7B_1	AAGCGTTGAAAAGGCGCTGG	15584
gRNA_USP10_3	ACAACCGAGAATAAATTCAG	3579
gRNA_USP17L12_3	GCAGGTCTCCTGTTACTCAG	8091
gRNA_USP24_3	TCTCCAACTAGTATTATGAG	4325
gRNA_FAM63B_3	ACCTTGTACTGCCCTCTCAG	15294
gRNA_USP43_3	CTGCAAGGTGGGCATTACAC	46721
gRNA_USP17L29_1	CTACCTGCTTGTGCCCGGGA	10088
gRNA_USP17L26_3	TCCAAATATTTGGTGGATGA	2316
gRNA_JOSD1_3	GGACAGCAATGCCTTCACCC	6909
gRNA_USP8_3	TGAAGTCCGGAAAAAACTTG	7263
gRNA_USP17L4_3	GCTGGGTGGAGTTGTCACGA	8300
gRNA_UCHL1_1	AATCGGACTTATTCACGCAG	4894
gRNA_USP16_3	GTGTTACGTATGTGATAATG	6001
gRNA_BRCC3_2	AGTAATGGGGCTGTGCATAG	36727
gRNA_USP17L30_3	CCAGCAGCCAATGCCTGTGA	8330
gRNA_OTUD6A_3	GGCCGGCTTCAAGCGCGAGG	9739
gRNA_USP22_3	TGGGGCTCTGCATCTCACAG	11137
gRNA_USP7_2	GGCAACCTTTCAGTTCACTG	5487
gRNA_BRCC3_3	GCTCTGGAGAAATTTCTACT	53889
gRNA_OTUD1_3	CTCCGCCGCACTACTCGGGG	12961
gRNA_USP40_2	CATGGTACAGACGATAGATG	24948
gRNA_COPS6_1	GGTTCAACTTCAGAAAGAGG	966
gRNA_USP17L2_1	TGACATGACCAGGACTGTGG	18702
gRNA_ATXN3L_1	TGGAACATCAGACCAAGATG	10562
gRNA_USP17L26_2	TCCAGGGCGATGTCCAGGTA	8629
gRNA_USP6_1	CCAACGGACCTGGATATAGG	21908
gRNA_USP30_2	TGTGTGTGACAACTGTACAA	16591
gRNA_USP16_2	TTAAGACACAGCCAAACTGA	3492
gRNA_COPS5_3	GGGTGGTATCATAGCCACCC	9893
gRNA_USP17L21_2	AACTTTACTCACCTCTGCCA	3524
gRNA_USP45_3	AGATTAATTATAATACAATG	1414
gRNA_USP26_1	GGACAGAGTTCATCAAAACG	11221
gRNA_Non-Targeting_Control_23	TTATGTGAGCACGCCATTAC	19526
gRNA_USP27X_2	ACTGCTTGCGGAGGTTTACG	15685
gRNA_USP17L3_2	CTACCTGCTTGTGGCCGGGA	16597
gRNA_USP10_2	AAATAGCTGTAATATCCAGG	7149
gRNA_USP17L24_1	GACCTGCTGCGGTGGGGGCT	4162
gRNA_USP17L11_2	TTGGCTGCTGGCTTCCATAG	7572
gRNA_YOD1_2	AGTGTGTACTATGTCGTCGA	13295
gRNA_ATXN3_2	CTGTCATCCATATTTCCAGA	14626
gRNA_USP17L19_3	CCTGTGAGGGCTGGATGACG	9669
gRNA_FAM188A_2	TTGGACCAGTATTCAATGTG	15574
gRNA_USP2_3	TCTGGATGGGCTCCATAACG	13425
gRNA_USP4_2	TCAACAGAGACAACCCTCTG	14924
gRNA_USP17L21_3	GAGTAACAGGAGACCTGCTG	10938
gRNA_CYLD_3	TGAGACTGAATGGTAAAGAG	3884
gRNA_USP17L3_3	GCCAGAAGCCAATGCCTGTG	16502
gRNA_MYSM1_1	CAAGCTCAGAAATTACACTG	5984
gRNA_USP13_3	GCCAGGACTAAGTTAGGACA	16954
gRNA_USP38_1	GCTGATTATGAGCTGTCCGT	10422
gRNA_OTUD4_2	TTACCTGTACATAAGAGAAA	4131
gRNA_USP31_3	GACTTATTACCTGATCAGTG	14132
gRNA_USP21_3	GAGAAGGGACTTCCGGCAAG	16687
gRNA_USP31_2	GGCAACGCCAGGCATCATCG	13425
gRNA_Non-Targeting_Control_34	GTTGATCGAAAATGGGAGAA	13522
gRNA_OTUD5_1	GGTTGTGCGAAAGCATTGCA	3157
gRNA_COPS6_3	TGGGTTGGTATACCACAGGG	6465
gRNA_USP17L2_3	ATTGCGGTCTTTGTCTCCAG	2948
gRNA_Non-Targeting_Control_30	GTTCCCCGGGAAGTCTATGC	17130
gRNA_USP17L21_1	AAAGTTAACATCTTGGAGGC	12097
gRNA_USP30_3	AGGTGTTCCCTAAATTAACA	5194
gRNA_USP29_1	ACTCACTCAAGGTGTCCCAT	29522
gRNA_PAN2_2	CTCAAGTATATGGCCCGTGG	17239
gRNA_PSMD14_1	AAACACATCAATCACTCTGA	1383
gRNA_FAM63A_2	AGGTCAAAGACACTGCACTC	10281
gRNA_USP17L17_2	TCAAAGCTCAAGAAGGCCAA	8705
gRNA_USP17L24_2	TCTGAGCTGCCTGGATATCC	10154
gRNA_JOSD2_1	TCACCTCTTGCAGATCTCAT	6189
gRNA_UCHL3_2	GCCGCTGGAGGCCAATCCCG	6288
gRNA_USP46_1	GTTCATATACCTTAGACAGT	20206
gRNA_USP17L27_3	TTGCCAACTACATGCTGTCC	8281
gRNA_Non-Targeting_Control_10	TCGCGCTTGGGTTATACGCT	19428
gRNA_USP17L15_1	CAAACGTGTCATCGTCACAA	2578
gRNA_UCHL5_1	TTTATTATTTCAGGTTGCCG	11249
gRNA_USP21_1	AAGACAGCTCGGAATCGAGT	5987
gRNA_USP31_1	CAAACCTGAATGCAAACCGT	17918
gRNA_USP13_2	CTGGAGCATTACAGAGACAT	38712
gRNA_Non-Targeting_Control_4	AAATTGGCTTTCGTTCGTGC	11879
gRNA_OTUB1_1	GCAGGACCGAATTCAGCAAG	11741
gRNA_USP17L13_1	CAGGAACCAAATCATCACAG	2140
gRNA_USP39_3	AGGCGTGAGACTTCAAACCC	8403
gRNA_USP17L13_3	ATGAGGGTGGTGTCCTTAGA	12972
gRNA_USP44_3	TATTGGCCTTCGTTTAACTG	11251
gRNA_USP19_2	CAGATACAGACTGTGTGGTG	30546
gRNA_USP54_3	GTGGAGCATTCATCAACACA	7061
gRNA_FAM188B4_3	TTATTTCACATAAGTTGCCA	13031
gRNA_USP51_3	TCCATGCAGAACATTTAGCA	9675
gRNA_USP22_2	GCCATTGATCTGATGTACGG	21813
gRNA_USP17L18_1	GAGGACGACTCACTCTACTT	15329
gRNA_USP40_1	GAAAACAGCATGGACCACTG	11125
gRNA_BAP1_2	TCTACCCCATTGACCATGGT	6859
gRNA_USP25_2	GGCACCAAGGCACATAACGG	12150
gRNA_USP9Y_1	TAACAATACTCATCGCCTAG	8987
gRNA_Non-Targeting_Control_28	GGACGCACCATTCCGGGTGA	28072
gRNA_USP48_3	CAGACACGTAAACCCAAGTG	18703
gRNA_Non-Targeting_Control_36	TGTGAAAGTTTATGGTGTTA	15847
gRNA_FAM63B_2	GAGGGTCTACTAACCACCCA	13825
gRNA_USP9X_1	TCATACTATACTCATCGACA	690
gRNA_USP17L1_3	GACATGGCCAGGACTGTGGA	18875
gRNA_USP17L27_2	CCCTTACCTGGACATCGCCC	6222
gRNA_STAMBP_1	AATCGATGGATTGCGCCATG	19723
gRNA_USP17L4_2	TATGCAAGCTCACATCACAT	5255
gRNA_USP36_2	GAGCACACGTATGAGAGCTG	12284
gRNA_USP17L28_1	TATGCAAGCTCACATCACAC	1031
gRNA_USP9Y_3	TGATGGTCCCAATCTAGAGG	13633
gRNA_OTUD3_1	AGCACTACGACAGTGTTCGG	2339
gRNA_USP15_2	TCTAACTAAGTAAACTTCCA	3892
gRNA_OTUD5_2	GAATGCCATAAAAACATCGG	1995
gRNA_USP13_1	CCTGAAAAGACATGTGCGAG	23224
gRNA_USP8_1	ATGAAGGAGCCATTTCCGGT	2233
gRNA_FAM188B_1	AAGATGCTCAGAGACTACAC	4708
gRNA_USP48_2	CTGGCGCCAACTCCGCAAGG	23164
gRNA_Non-Targeting_Control_21	TCCGGAGGCTCAAACCAAGT	13583
gRNA_STAMBP_2	AAGGCCAGCTAAGCCACCTG	16619
gRNA_USP17L8_3	ACACGGGTCTCAGATGAGAG	13214
gRNA_USP44_1	ATCACTGCACAACTCGTAGT	14496
gRNA_USP38_3	TCTCTATGAACCTATTCTGG	10197
gRNA_USP17L25_2	TGAATTTCTCATGTTCACTG	533
gRNA_USP37_1	AGGGTTGCTAGAAAATCGGT	3577
gRNA_USP32_3	CTGTAGTATTCACGTAACTG	39626
gRNA_UCHL3_1	GGATCCTGAACTCCTTAGCA	6772
gRNA_MYSM1_2	GAGATGTTAATTGTATTGGA	6901
gRNA_USP4_1	GAAATGGCAACTCAGCACAT	22664
gRNA_USP17L25_1	AAGAGATTCTCCGATGTCAC	5149
gRNA_USP5_1	ATCCTGGGTAGGGTCCGTCG	10212
gRNA_USP20_1	GTCGACCTACCAATTGGACA	11556
gRNA_USP17L18_3	GACGACTCACTCTACTTGGG	6515
gRNA_Non-Targeting_Control_3	AAATAATATGCATCTCTCGA	7538
gRNA_ATXN3L_3	TCAGAAAACATGGATGATAC	14942
gRNA_USP17L13_2	CTGTGATGATTTGGTTCCTG	25700
gRNA_USP3_1	CCCATTCCTTAACTCCACGG	10926
gRNA_USP17L30_1	TGTTTGTCTCCAGAGGGCGC	5466
gRNA_Non-Targeting_Control_11	GAACTGGCAAACAGGCGTGG	34337
gRNA_OTUB2_2	CGCCATCCGCAAGACCAAAG	14804
gRNA_USP17L10_1	TCTCAGGGAGAGAAGTACGC	17943
gRNA_OTULIN_2	ATTGCTTATACATGAAAGAG	9056
gRNA_PSMD14_3	TACCAACCAACAACCATCTC	4673
gRNA_USP33_2	ATAGTCAAAGCAGGATCATG	14722
gRNA_OTUB2_3	GATTTACCGGAGGAAAATCG	9676
gRNA_USP46_2	TGGCAACATGAACGAACCTG	14953
gRNA_USP17L10_2	TGACATGGCCAGGAATGTGG	10971
gRNA_USP20_3	CCTTTCTTGAGCACGTACGA	9957
gRNA_USP9Y_2	TGGTACAGACCCCATAACAC	18533
gRNA_VCPIP1_3	CCCCTTGGTAGGCATAAAAG	9734
gRNA_Non-Targeting_Control_31	TGACGCTCCACGTCCGGACC	8548
gRNA_ZRANB1_1	TCAGTTCTACAAGCTACCTG	9179
