# Supplementary material for: Circular synthesized CRISPR/Cas gRNAs for functional interrogations in the coding and noncoding genome
Source: eLife journal article supplement (doi:10.7554/elife.42549), 2019-03-06
Supplement: supp [file elife-42549-supp-v1.zip › elife_poa_e42549_Supplementary_File_23.xlsx]

## Sheet: Sheet1
CTRL			Doxorubicin
Guide name	Guide sequence	read count	Guide name	Guide sequence	read count
twist_21	CCGCTAGTATAAGAAAAGGG	1990	twist_21	CCGCTAGTATAAGAAAAGGG	174
twist_3873	AGGGATAACGCAACTAACGG	1807	twist_837	CGTGCAGGCCCCTAATTGCA	165
twist_4108	CCGCACGAACCAGATTAAAG	1785	twist_3003	CAGAAGAGCCGTTTGCCCAA	161
twist_4200	ACACCGCTTCTACCAAGACG	1706	twist_3195	CCGCGCTGAATAGTGCCAAG	158
twist_1902	CAGCCGGGACCTCCTCAGCG	1698	twist_1944	CCGCAAGCAGCTGTAATCCG	126
twist_2224	CAGCGGTGATGATTAATAAA	1670	twist_3099	CCGCACAAACCAGATTAGAG	120
twist_1387	CCACCAGGAAACAAGCCCAA	1568	twist_2046	CCACTAGGAACAGAAACGGA	117
twist_1579	CCACCTCGAGTAATTCGCCG	1524	twist_3803	TATACCTTTCCTACGTCCAA	116
twist_444	CCGCCGGAAATTACTAGAAG	1498	twist_1406	CAGCGCTACCAATTGACCAG	116
twist_1984	CCGCGCAGATCGTAACCCCA	1494	twist_2246	CATCCTCGTATCCTGTAAGA	116
twist_3646	CCACCTAGCTACGTGTGACA	1471	twist_3876	CCTCAGGACGTTCTTCACCA	111
twist_234	CCACCTAGCTACGTGTCACA	1469	twist_3037	CCGCGCTTAATAGTGCCAAA	110
twist_3036	CCACCTAGCTACGAGTCACA	1463	twist_1447	GCTACCGGATAAGAGTCCAG	109
twist_3829	CCGCACCGACACTAACACAA	1435	twist_2053	TAACTCGGATTATTGAGAAG	104
twist_3572	CGGCAATGACGTAAAAGGGA	1433	twist_2210	CCTGCTTCTGGTCATATGGG	104
twist_396	CAGCGGTGATGATTAATGAA	1429	twist_382	CGAGCGATCCACATAATCAA	104
twist_2046	CCACTAGGAACAGAAACGGA	1426	twist_3132	CCAGGGATACAAATGCCCAG	101
twist_1141	CAACCGGGAGGAACTCGCCA	1423	twist_3007	CCGCTTGTATAAGAAAAGGG	97
twist_3353	CAACCAATCTGAAAGATCCA	1422	twist_1104	CGGTCGGGCCCCTAGATAGA	97
twist_260	CGACCGGGCCAAATAAGGAG	1422	twist_2849	AGTGAAAACCTACCACCCCA	95
twist_1394	CCGCGGGTAGAGTAAACAAA	1415	twist_3708	CCTGCAATTGCTCCTTGGCA	95
twist_225	CCGCGCTGAATAGTGCCAAA	1377	twist_1816	CTGAACAATTACCATTTCGG	92
twist_4043	CGACACCGCAAGACTTGAGA	1374	twist_3460	CAAACCTGCTCAGCGTGCCA	92
twist_1788	CATCGCAAAGAACCGTGGCA	1365	twist_1049	GGTTCCGAACAGAAAATGGG	91
twist_4204	GCACCGATAGGCAAGTCACA	1335	twist_1629	CCACCTATTAAAAAGTAACG	91
twist_2888	CCGCCGGAAATTACTAAAAG	1333	twist_3443	AGTGTCGCACCACTTCCCAG	91
twist_2782	CAGCGGTGATAATTAATGAA	1330	twist_2149	CCTCAGGTCGTTCTTTACCA	91
twist_55	TAACAGGGAAGGGCATCCGA	1330	twist_219	CCACACCCACCGACAAAGCA	89
twist_1614	CAGCCAGGCACCCTGACCCA	1326	twist_3472	CAGCCTCGATAACAGAGGCG	88
twist_1791	CAGCCGATATCAAATTCAAG	1321	twist_2752	CAAAGAAATCACGTGAGAAA	86
twist_3246	CAAGGGTGAACGCATCGGGA	1317	twist_267	CCTGCCAACCCTATACGCCG	86
twist_3007	CCGCTTGTATAAGAAAAGGG	1295	twist_2944	CTAATGATTACCCCGAGGAA	84
twist_304	CCAGGGATACCAATGCCCAG	1290	twist_2232	CCTTGTGAAGAACCAATACG	83
twist_1187	CCACACACCACAGCAATGAA	1289	twist_2168	CTACATGTACGTCATATGAA	83
twist_4031	CAGCCAGTCAACAAAAACGA	1288	twist_3713	CAAGGGGCCTGGACTACAAG	83
twist_4123	CAAGGGTGACCGCATAGGGA	1281	twist_428	CAAGCAATTCCGACGTACAG	82
twist_1323	CCACCATATTCTCAATTAAG	1279	twist_102	GCGAGTCACTGGTAAACGGG	81
twist_3513	CAAGTGAAAGAACATATCGA	1278	twist_2876	ACGCCGCTTCTTCCAAGACG	80
twist_201	CAGGAGAGCCGTTTGCCCAA	1269	twist_2316	CTAGACTTAACCTAGCCGAA	80
twist_1407	CAGCACAACTAGGATAGACA	1269	twist_77	CGGCATTCTCTGGAGTTACG	79
twist_1947	CAGGAGGGATACGCACTGAA	1265	twist_1426	CCGCCGGTAACTCAGATCCG	79
twist_2085	CCGCACGGTTTCTTGCAAAA	1260	twist_1653	ACGGGCCATGACCTAACGGG	79
twist_2109	CGTCAAGGCGAAACGACAGA	1260	twist_869	CCTGTGTACATTCCATTGGA	77
twist_2093	ACGGACACAGGGGCACACAA	1257	twist_2286	CAACTCCAATCCGCAATGCA	77
twist_872	CGACGAACTGACACGTAAAG	1257	twist_4128	CAAGGTATTGAAGCTAAAAG	77
twist_918	CAAGGGTGACCGCATCGGGA	1253	twist_2818	CAGGGTCCTAGAGTAAGCAA	76
twist_662	CAACGGGATCGCTCGATCAG	1249	twist_1902	CAGCCGGGACCTCCTCAGCG	76
twist_1497	CAGCAATCACATGATTACAA	1230	twist_1712	ACACAATTCCGGCCATTGCA	75
twist_24	CAAAAAGACACACCGCGCAG	1229	twist_3753	CCGGGACCTAGAGTAAGCAA	75
twist_566	CGGGGGATATCACCGTGACA	1225	twist_741	CTACAAACCGGCCATAAAGG	75
twist_3462	CGGGGGATATAACCGTGACA	1224	twist_2757	CTTGGGCCACGTTTTTTCGA	75
twist_668	CAAAGGGACCAGCAACGAAA	1221	twist_2663	CTGGCCCCCAAATCAATACA	75
twist_1089	CCGCACAGATTACTGTCAGA	1221	twist_1770	GCTGCGTACATACCTTTGAA	75
twist_3320	CAATGGCATCCAGCGTGGAA	1219	twist_1645	CTAGGAACCGACGCGCCCCA	75
twist_2848	CAGCCAATTTGAAAGATCCA	1218	twist_805	CTATAGGGACTGGAGTACAG	74
twist_3033	CCGGGTTGTACGAAGCCACG	1216	twist_2606	CAAACTACATCCTAACCGAG	74
twist_928	CGACCGATTGTCATAACAGG	1212	twist_2612	CTGAGCAAACTACAGTCCAG	74
twist_763	CAGCCTCTCATGGAGCCGGG	1206	twist_1662	CAAGGCCCATGAGATACGGA	74
twist_1759	CATGAGGGCCTGGCTCTGAG	1206	twist_1239	CGATACTTCATATTGAAAAG	73
twist_3734	CCGCACGAACCAGAATAGAG	1205	twist_1956	AGACGCGTTTCTCTGAGAAG	72
twist_4142	CTACACACCCAACAGTACAA	1203	twist_2391	GCGCCATATGAAGATTCCCA	72
twist_1470	CCACCAAAAGTATAAACCGA	1199	twist_51	CGATGACAAAACGATCTCCG	71
twist_2285	CAGCACACTTAAAAGAGCGA	1193	twist_3882	CCAGAGTGCTAATAAACACA	71
twist_2993	CCGCCGTCTATTACATTAGA	1190	twist_3350	GCGCATGACCGTCATTCGAG	70
twist_2830	CAGCCGTCTATTACATTCGA	1184	twist_2577	TGAAACCGTCCTGCATTAAG	70
twist_2836	CCGGCACCCATACATCAAGG	1182	twist_3535	CCGACCGTTTTTCCAAGGGA	70
twist_3753	CCGGGACCTAGAGTAAGCAA	1182	twist_1418	CGTTATCTATCCACACTCCG	70
twist_2673	CAGGGAAACTGAGCGTGACA	1181	twist_3478	CCGACCCTTTTTTCAAGGGA	69
twist_792	CGTGCGGGTGAACTGATAAA	1170	twist_2468	ATAAACCGCTTGGAAACGAG	69
twist_1846	CAACGGAATGAAATAATACG	1163	twist_1862	CCGAGGGTAAGAACGCAAAG	69
twist_2401	CATAACACAAAGAAATTAAG	1163	twist_550	CTATGACCCCAATTACGCCG	68
twist_1426	CCGCCGGTAACTCAGATCCG	1161	twist_259	GAGCATAAATGTTATAGCGA	68
twist_1036	CAACGGGTCTCTACATACCA	1157	twist_3619	CAGACGTATAGAACTCGCAA	68
twist_3404	CCACGCGATTCAGATAAACA	1155	twist_939	CCGAGTGACAAACATACCGG	67
twist_382	CGAGCGATCCACATAATCAA	1154	twist_2512	CCTAATCACTCCTTTTCAAG	67
twist_493	CAGCCAGACAACAAAAACGA	1153	twist_545	GGGCAAGGTGCACATCCCAA	67
twist_1585	CAGCACGGTTTTCATCACAA	1151	twist_1127	TAGCACTGACAACCGAGCAA	66
twist_3598	CATACAATAACGGAGATGAA	1150	twist_1516	GCTCGGGGAATACCGTAGCG	66
twist_1367	ACACAGGGCCACATTCTAGG	1150	twist_3374	TAGGGCCCTGCGTAAATCGA	66
twist_401	CCGGCGACACAACCGATACA	1148	twist_396	CAGCGGTGATGATTAATGAA	66
twist_3097	CCACGTGAAGAACCAATACG	1148	twist_1057	CAAGGTCCCAGATTTATCCA	66
twist_3132	CCAGGGATACAAATGCCCAG	1147	twist_947	CTACTAATTGATCTGAACAG	66
twist_672	CAACCTGCAATCTATACGAA	1145	twist_2162	AGACGGTCCGGGCCTTGAAA	65
twist_2649	CAGGAGAGCAGTTTGCCCAA	1141	twist_829	CATGTAATTGCGAAGCCAAA	65
twist_393	CCGCACGAACCAGATTAGAG	1138	twist_2615	CGGGTCAATATTCCAACGGG	65
twist_2509	ACGAAGGCAGTGCAGCTCAG	1137	twist_2633	CAGGCACCAAAAACAAAACA	64
twist_1220	CCGCGATTAAGTCTTTAAAA	1136	twist_2196	CATCTTGATTAAGTGACCGG	64
twist_3089	CAGGGAAACTGTGCGTGACA	1136	twist_2673	CAGGGAAACTGAGCGTGACA	64
twist_294	GCTACGGATTTCCAATAAAG	1131	twist_2951	AGGGGCGGCCAGATATGCAG	64
twist_164	CCGCGCCGACACTAACACAA	1130	twist_1243	CGGTCTACTGTCTCTTACGG	64
twist_3354	CAAAAAGACACCCCGCGCAG	1128	twist_2537	GCGGACCTTTGATCTTCAAG	64
HDAC6_3737	AGGACACGCAGCGATCTAGG	1126	twist_2095	CCTCTATAACATAATATAAG	64
twist_1862	CCGAGGGTAAGAACGCAAAG	1125	twist_3702	CGAAACGACTGATTAAACGG	63
twist_1472	CCGGCACCTTTAATTCGCGA	1119	twist_1596	CTAGCCACAGTCTAGAGACA	63
twist_1154	CCGAGCCACCAAGCATGAAA	1119	twist_1964	CCGTTGATACCCACGATCAG	63
twist_2705	CAGGGAAAATGCGCGTGACA	1118	twist_1839	TAAAGCCCATAACTTCCCCA	63
twist_3427	CATCCGATCTTTAATTTCAG	1117	twist_856	GCAGAAGGTAGTAAGCCAAG	63
twist_3493	CATCCGTGTTACATACCGAA	1117	twist_3036	CCACCTAGCTACGAGTCACA	62
twist_902	CAACAAACCACGTTAAAAGA	1115	twist_1706	CGGCCGGACGGACAACCCCA	62
twist_150	CAGGCATCCAGGTCAACGCG	1114	twist_2425	AATACGGGCATAGCAAGGGG	62
twist_3472	CAGCCTCGATAACAGAGGCG	1108	twist_2426	ACTAGTAGCAACCTTTGCGG	62
twist_3277	GCACCCATAGGCAAGTAACA	1107	twist_4024	CGGCGATGACATAAAAGGGA	62
twist_1392	ACGCGAGACATAGAAACACA	1106	twist_1425	GCATGAGCTGCACTTTGAAG	62
twist_2107	CCGTGCAATAGACCTATCGG	1102	twist_2620	CTGTGGCCTCCGACTAGAAG	61
twist_1034	GAGCGACAACGGGATCCACG	1101	twist_1092	CTACTCCAAATTATTTAACA	61
twist_3702	CGAAACGACTGATTAAACGG	1100	CYSLTR2_2132	GAAACGCACAACACTCAGCA	61
twist_4129	CAGGACACTGTATCACCGGA	1100	twist_2423	ACACCTTAAAACACGCCGAG	61
twist_4229	CGGGGAAACTGCGCGTGACA	1098	twist_3351	CCTTACGACTACCTTTTACG	60
twist_3232	CAACTCCGAACCGCAATGCA	1096	twist_2393	CAATTGGACCGCTATACCAA	60
twist_1288	CGATCCACTACGGCTAACAA	1094	twist_1998	TGGAGCCGCTTTATTCAACG	60
twist_2143	CCACACGCTAGCTAGATGAA	1092	twist_291	ACAGGGGACGGCAAGTTACA	60
twist_1145	CCACTGAGTTCACATCGACG	1091	twist_2919	CCGACCCTTTTTACAAGGGA	59
twist_3713	CAAGGGGCCTGGACTACAAG	1091	twist_996	CAGGGTGCCCATTCTAGGGA	59
twist_4127	CAACGGGTCTTTACATACCA	1088	twist_4212	TGGATGCGATAGGCTACGGA	59
twist_1683	CGGAGGGCCTAAGTTTAAAA	1086	twist_847	CGATCTAACTGGCTACACGG	58
twist_4188	CGAAGAAATCACGTGTGAAA	1085	twist_252	CTTAGGCCTATGTAAAGGCG	58
twist_2647	CAAAAGGACACACCGCGCAG	1083	twist_390	CAGTGATAAGCACCATTGCG	58
twist_3359	CCACCATATCTAGATAAAAG	1083	twist_1923	CTACGTTACGCACCGAACAA	58
twist_2230	ACACCTCAAAACACGCCAAG	1076	twist_398	CCATTTTTTCCCCCGATAGA	58
twist_940	CGGCCGACACCCGAGTCCCA	1075	twist_601	CAGGGCCAAACCGTTTAAAA	58
twist_3071	CAGCACGAACCAGATTAGAG	1074	twist_2346	CAACTCCGATCAGCAATGCA	58
twist_1037	CCACACCACATGACAATCCA	1074	twist_33	CCGAAGGCAGTGCAGCTCAG	58
twist_2550	CCTACCAGTGAACAGACAAA	1074	IL3RA_2146	CGACAAACTTATCTGTGCAG	58
twist_3385	CAGGTACCAAAAACAAACCA	1071	twist_41	TAAAGACTATGACCACCCAG	58
twist_346	CCGAGCCGATCGCTGCCAGG	1071	twist_75	CTGCCTGTTGCCAAAAGCAG	57
twist_686	CCTGAAGCCCGGATGACGAA	1071	twist_2857	ACTGGTAGCGACCTTTGCGG	57
twist_2844	CGGCCTGGCACCTCGCAAGA	1070	twist_3469	CTAACCTTAACCTAGCCGAA	57
twist_215	CAAGTGAAAGAACATTTCGA	1070	twist_3066	CCTACAAATGCTCCTTGGCA	57
twist_3903	ACAGGACATGGGTAAAGAGG	1069	twist_3071	CAGCACGAACCAGATTAGAG	57
twist_3477	CAAACACATGGATAGACGAA	1064	twist_2417	CGGGTTCATATTCCAACGGG	57
twist_1406	CAGCGCTACCAATTGACCAG	1062	twist_4082	CATTTTTTCGCTGAGCCACA	57
twist_3037	CCGCGCTTAATAGTGCCAAA	1061	twist_3626	ACACAGTCATGCTCTCACGA	57
twist_2493	CAACTCAGATCCGCAATGCA	1060	twist_4205	CATGGGCCACGTTTGTTCGA	57
twist_2866	CATCCGATCTTTAAATTAAG	1060	twist_1271	CATGGTCGTTGGTTTTCGAA	56
twist_2202	CCGGCACCCATTTATCAAGG	1060	twist_467	ACATAAAACAAACCAAACAG	56
twist_532	CCAGGGTGTTTGAAATCCAA	1055	twist_1984	CCGCGCAGATCGTAACCCCA	56
twist_3915	CAGCGATAAACCCAGACAGA	1052	twist_3267	CGAGCTCACACAAAACCCGG	56
twist_3618	CAGGAGAGACGTTTGCCCAA	1048	twist_1683	CGGAGGGCCTAAGTTTAAAA	55
twist_1988	CGGAAACAAGGGGAATTAAA	1047	twist_3789	CCTAAAAATAGCATAAGCGG	55
twist_2974	CCACACACCACAGCAATAAA	1046	twist_2835	CTGTAATGTTTATTACGACA	55
twist_3861	CAAGGGTGACAGCATCGGGA	1045	twist_368	CCGACCCTTTTTCCAAGGGA	55
twist_1742	CCGCAACGATCATAGTCGAA	1043	twist_2059	TAGACCGTACACATGTCACA	55
twist_3264	AAACAGGTAACCTAGCAGAA	1040	twist_453	GGACCCATAACTACTCGGGG	55
twist_3091	CCACTCCCCGGGTTTTACGG	1040	twist_527	CTGTTCACAGGGGTGCAAAA	55
twist_4097	CGGGCTCCAGCAGCAAGACG	1040	twist_2523	CCAATTGGAAGATAAATCCA	55
twist_2032	CGGAGTCACAGGGCACCACG	1039	twist_31	CGTGACAGCAGCATACTAAA	55
twist_3021	TAACAGGGAAGGTCATCCGA	1038	twist_364	CTTCAGTTTGACGAAATGAG	55
twist_1158	CAACGCCCACCTCAGAGGAG	1038	twist_2611	CAATACTAAGTCTTTCCGCG	55
twist_3535	CCGACCGTTTTTCCAAGGGA	1038	twist_873	CAAGAAGGCCCCGATTAAAG	55
twist_3010	AAACCGGGCATAGCAAGGGG	1036	twist_2328	CTAGCCTTAACCTAGACGAA	54
twist_1662	CAAGGCCCATGAGATACGGA	1036	twist_1952	CTAGTGACTGAAACGCCCGG	54
twist_3242	CAATGGCATACCATGTTAGG	1036	twist_2745	CTGTTGCGCGAGGAGTACAA	54
twist_3648	CGGAGTGTAATCTATTCCAG	1033	twist_1039	CTGCCTGCTGGCTCAAAGCA	54
twist_830	TGTGCGCAACCATAACAGGG	1033	twist_2455	CCTGCTCCTTGTCATATGGG	54
twist_1636	CCGAACAGTTTCCATTCGGA	1031	twist_1704	CCTACGGTCATCCCATTGCA	54
twist_3779	CGAAGAAATCACGTGAGAAG	1030	twist_71	CATCGGCAAATTAAACTGCA	54
twist_2787	CCGCAGTCTATTACATTCGA	1030	twist_690	CCTACGAATCGGGCGAGACG	54
twist_754	CAGTATGTCAGACAACCAAG	1030	twist_3176	CCTCGTGAAGAACCAATAAG	54
twist_146	CCGCCTGTATCCCTGAGAAG	1027	twist_2690	CAGGGAAACTGCGCTTGACA	54
twist_3195	CCGCGCTGAATAGTGCCAAG	1027	twist_1506	CCTCAAAACCGCAATCAAGA	54
twist_219	CCACACCCACCGACAAAGCA	1026	twist_855	CGTCGCGGTCTCGTTACCCG	54
twist_3019	TAACAGGGAAGGGCTTCCGA	1025	twist_2350	CTAATACTTAGGAAGCCAAG	53
twist_4024	CGGCGATGACATAAAAGGGA	1025	twist_2659	CATTTAAGAACCACGTTACA	53
twist_131	CGGCGGCGAGACCATTCGAA	1025	twist_2016	CGATCAGATGTCACACTCAG	53
twist_2813	CTAAGAAACAAACCATACAA	1024	twist_881	CATACTCGTTGAACGTTGAG	53
twist_1730	CCGATAAGTTAATTGATCGA	1022	twist_1718	CGATTCCGCGAAACACCCCG	53
twist_1686	CGGCTGAACAAAACAAAAAA	1020	twist_1659	ACTTACCGTTACCATACGGG	53
twist_2456	CCACACCCACCAACAAAGCA	1020	twist_3625	CCTGACGTCATTATTCACCA	53
twist_1241	CAACACTCTACCAATCTGAG	1019	twist_2440	CCGCGCCAACACTAACACAA	53
twist_1907	CAACAGATAACGCCGAAAAA	1019	twist_2298	CCTGACCTCCTTACATCCGG	52
twist_3454	CCGCGGCTCAACTAACTAAA	1011	twist_720	CTAGGTGGCGCAAAACGCAA	52
twist_1869	CGTAGAAGAATACAGCACAG	1011	twist_1954	CATTGGCAAATTAAACTGCA	52
twist_3101	ACGATGAGAATGAATATGGG	1010	twist_767	CGATGTATTCACACTAAGGG	52
twist_2975	CAAGGGGCATAGACTACAAG	1010	twist_1359	GCTACATAACGGGTATGGAG	52
twist_3352	CATCCGACATCGACTACCAG	1007	twist_3220	CCAGGCCCCCGGTATTCACG	52
twist_3099	CCGCACAAACCAGATTAGAG	1007	twist_3284	TGGGAACCCTTAAATTTCGA	51
twist_344	ACACTCGGCAGGTATATGAA	1006	twist_319	TCAGGGCTCGATTTGTCAAA	51
twist_1957	CCGACGAGACGACATTCCGA	1005	twist_524	CTGCTCCTCGCCTTTACCCA	51
twist_3055	CATCCGTCATCGACTACAAG	1004	twist_4184	GCGTGGTAAGTCCAGTAGAG	51
twist_726	TCACACATTGGATCGCAGGG	1004	twist_3180	CTTAGCCAAGTTGCATTACG	51
twist_2697	CGGGCTTCAGCTGCAAGACG	1004	twist_909	CGACCCTTACCCTTTAACAA	51
twist_3032	CAGCCTGGCACCTCACAAGA	1003	twist_4106	CCAATCGGAAGATAGATCCA	51
twist_3451	AAGGATAAAGAAGTTAACAA	1003	twist_3491	TAGGGAAACTGCGCGTGACA	51
twist_2634	CAACATACCAGGTAAAAAGA	1002	twist_3740	TGATAACGATGCGCGTGAAG	50
twist_2423	ACACCTTAAAACACGCCGAG	1002	twist_1116	CCTCGGTCACATATGACGCG	50
twist_684	CATGGTGATATTACGAACAA	1001	twist_2892	CGTCCTCGATAACAGAGGCG	50
twist_736	CATAAGCGACGGAATATAAA	1000	twist_3381	CCTACAATTACTCCTTGGCA	50
twist_3563	CATCAGATCTTTAAATTCAG	1000	twist_1480	CGGTAAGTAATGCTTCCGCA	50
twist_2407	CGGCGGCGAGACCATTTGAA	1000	twist_3452	CCTTAGGCAGGGCTTCTGAA	50
twist_3461	CAGGCATCCAGGTCAAAGCG	997	twist_1442	CAATGGAATTGATAGCAAAG	50
twist_1517	CCAGCCTGATATACTCCGAA	996	twist_1291	TTGGGTGATACAAAATCGGG	50
twist_2277	CAAAAAGACACACAGCGCAG	996	twist_1513	GCTTACTGCACCAATCACCA	50
twist_2680	CGGCATCGATAACAGAGGCG	996	twist_1306	TAGCCATAAAGCTAATAAGG	49
twist_1763	CCACCTAGACTACCTCTGCA	992	twist_656	CGACGACGAATCTTTTGCAG	49
twist_3946	CGTGAGAGCAGCATACTAAA	992	twist_3674	CGGCCTGGCACCTCTCAAGA	49
twist_1266	CATGTAGTATATGTTATGGG	992	twist_3822	CTACGTGATTAGCCATTAAA	49
twist_775	ACACCCGGAGACCATAAACA	991	twist_3485	CCTGCTCCTGGTGATATGGG	49
twist_2789	CATGACAGTTCAGCAATCAG	991	twist_1354	CGTATAAGTACTCTACGGGA	49
twist_3483	CTATAGGGACTGGAGAACAG	991	twist_4091	CCACAGTCATGCTCTCAGGA	49
twist_155	CAAACCCCCGCCAAGTACGA	990	twist_1258	CTGAGGAGTTGCTCGAGACA	49
twist_4134	CGGGCACCAAAAACAAACCA	987	twist_4093	TAGGTGATTTAGATACTCGG	49
twist_3626	ACACAGTCATGCTCTCACGA	986	twist_1983	GATCGACATGCCCCGCTAGG	49
twist_1848	CGACCTGACGATACAATAGG	985	twist_1309	CCACCCAATTGCTATTCCAG	49
twist_654	CTAACAGGACAAAATCTCCG	985	twist_3612	CGATGCTAAGCCCAGTGAGA	49
twist_1767	CTTGCCGGACCTTCACGGGG	985	twist_1993	CCTGCTACCCCCACATCACG	49
twist_226	CCACGCGATCCAGATAAACA	985	twist_2060	CAAGAGCCCACGGTTCCACG	49
twist_3817	CCTACCGGTGCACAGACAAA	982	twist_78	AGGGGCGGCCAGTTATGCAG	49
twist_2200	CCGCCTGTATCCCTAAGAAG	980	twist_3323	TGGGGCCCTCTATTGCTGAG	48
twist_678	CCGTCGTATTGTACGAGAAG	979	twist_1512	CGGGATTCTCCCGAACGGGA	48
twist_1064	CAAATGTACCGGAAGCACAG	979	twist_155	CAAACCCCCGCCAAGTACGA	48
twist_3110	CCAATCGGAAGATAAATACA	978	twist_529	GCGCTGTCACTGGTGTGGGA	48
twist_3052	CCGACGTATAGAACTAGCAA	978	twist_473	CTACCCATCCGAATTTGCGG	48
twist_2994	CCGCGCCGACACTAAAACAA	977	twist_2678	CTGGCCCACAAATCAATCCA	48
twist_939	CCGAGTGACAAACATACCGG	975	twist_2698	CTAGACATTACGTCGACCAG	48
twist_2870	CAGGGGCCCCGCATACACAG	975	twist_4046	CGTTCGTGTTACATACCGAA	48
twist_464	GAAACAGGCAAATAGTCAAA	975	twist_518	CTAGTCGATCCGCTTCGGGG	48
twist_2054	CAGCGATGAACCCAGACAGA	975	twist_1589	CGAGGTGGCATACTTCGAAG	48
twist_2496	CTGGCACCACTTCATTAAAG	974	twist_1731	AATGCATCAGCGCAGCACAG	48
twist_2837	CATCAGTCATCGACTACCAG	973	twist_3642	CATACAATTACGGAGATGAA	48
twist_1629	CCACCTATTAAAAAGTAACG	972	twist_984	TTGCTAAGCGCGTAGAACCA	47
twist_1705	CAATGCAGAGCCCCGTTCAA	972	twist_2500	ATGGACAGTTTACCTCTGCG	47
twist_3968	CTGAGGAGTTGCTAGAGACA	972	twist_3056	AAGGTGATTTAGATACTAGG	47
twist_492	CAAGTAACTGAGGAACTGAA	972	twist_2576	CGGCCTAGATAACAGAGGCG	47
twist_1516	GCTCGGGGAATACCGTAGCG	971	twist_2579	TCGCCTCACTACCATTAGCA	47
twist_1196	CAGCGATGTCTTACAACCGG	971	twist_3100	TAACAAGGACCGCTTCCGGG	47
twist_786	CATCACGGTGCACCAAGGAG	970	twist_2650	GCGCGCTCCCTATAGCAACA	47
twist_3554	CAGGGAAACTGCGCGTAACA	970	twist_4010	CTAAACAATTACCATTTCGG	47
twist_291	ACAGGGGACGGCAAGTTACA	970	twist_1988	CGGAAACAAGGGGAATTAAA	47
twist_2060	CAAGAGCCCACGGTTCCACG	970	twist_361	CGGATCTGTGCGGTGCGCGG	47
twist_3733	CAGGCACCAAAAGCAAACCA	967	twist_1068	CTGGAATCTTCAAAAAAACG	47
twist_2750	ACAGGGGAAGGCAAGTTACA	966	twist_4086	CATTGAACCTTACTGTTCAA	47
twist_3798	TGAACGGCATGACATTGGGG	966	twist_444	CCGCCGGAAATTACTAGAAG	47
twist_3860	CAAAAAGACACACTGCGCAG	966	twist_765	CCAAAGGTCACGACTTTCGG	47
twist_4008	CCGAGAACTCTCACTAACCG	965	twist_1672	CATTCCCGACGGACACGGAG	46
twist_3261	CAACCAATTTGAAAGATACA	965	twist_2573	CTGAGAAAACTCCAGTCCAG	46
twist_4176	CATGACAGCAGCATACTAAA	963	twist_1276	GTGCACATATGGGCTAGGCG	46
twist_3526	CGGAGTGTAATTTATTACAG	963	twist_1767	CTTGCCGGACCTTCACGGGG	46
twist_499	CCGCCGTCTATTACATTCGA	962	twist_1799	CGACCCGGCGGCCAACTGAA	46
twist_2488	CTGGCACTACAACAATCAGA	959	twist_3947	CTGTGCTGCACCAATAAGCA	46
twist_3613	ACAGGGGACTGCAAGTTACA	958	twist_2396	GCACTTGTAACGGAGTTAAA	46
twist_3279	CCAGATCGAAACGAGCTACA	957	twist_1050	TTGTAGCTACCGAATACCCA	46
twist_1529	CAGACGTGTACAGCAATCGA	956	twist_3707	CCTTGGTTAGGTATTCCCAG	46
twist_3310	CGACAGATTGTCATAACAGG	955	twist_851	AGTGCCGCAAGCCTTACGAG	46
twist_3611	CGAAGTGAACGGTCTAGAGG	955	twist_119	CTACACACCCAACAGTTCAA	46
twist_3732	CAAGGGAAAGAACATTTCGA	954	twist_1007	CTGCTATCCCTATTAATGAA	45
twist_2626	CCACTAAACCTAGCAACGCG	954	twist_1008	CGGGAATACTGATCACTGCG	45
twist_3552	CAACGGGTCTCTACATACAA	953	twist_1938	GAGAGTGTCTGATTGCGCCG	45
twist_3047	CAAGTGAGAGAACATTTCGA	952	twist_807	CCGAAAAAAACGTTGCGGAA	45
twist_30	CAGGGAAACTGCGCGTGACA	952	twist_2668	AAGAATAGCCTATAGAGAAG	45
twist_2104	CAACAATTATAGCAATGACA	952	twist_773	CAAATGATTAGCGCTTTCAA	45
twist_4185	CCAGCGTTCCAGAAGACCGG	952	twist_1598	CCTGCTTCACATGTACAAAG	45
twist_3432	CGTGACAGCGGCATACTAAA	951	twist_2101	CAGGGCCCACGTCCGAGCCG	45
twist_318	CGATGGGCCCGGTTTTGAGG	949	twist_1449	CCATCAATATATATGTCACA	45
twist_1138	CAGCATCAACCGATATAGCG	949	twist_589	ACTGCGAATCTTCAGCCAGG	45
twist_3467	CCGAGCCGATAGCTGCCAGG	948	twist_304	CCAGGGATACCAATGCCCAG	44
twist_1042	CAAAACACCGCGAAATTCGA	948	twist_3683	TAAAGGCTATGACCACCCAG	44
twist_3639	CTGGCCCCCAAAACAATCCA	948	twist_628	CAGTATAACCTAGTGAACGG	44
twist_2497	CAGGGTTGTACGAAGCCCCG	947	twist_1795	CGAGGAACCACCCTTACACG	44
twist_1008	CGGGAATACTGATCACTGCG	947	twist_3779	CGAAGAAATCACGTGAGAAG	44
twist_3103	CATACAATCACGGAGATAAA	945	twist_1766	CGGGCAGTCTGGGCGATAAA	44
twist_580	CCAGAGGGCACTTAGCGACG	945	twist_1324	CGAACACATGGATAGACGAA	44
twist_1766	CGGGCAGTCTGGGCGATAAA	944	twist_1502	TATGCAGGAGTAACAATCCA	44
twist_1675	TAAGGGGCCGCGGATAACAG	944	twist_2325	CTGCAGGCTTTAAAGCGACA	44
twist_142	CAGCACACTCAAAAGAGCGA	944	twist_1213	CTATCACCCAGTCCGTTACG	44
twist_3159	CAAGGGATACCAATGCCCAG	943	twist_4130	CTATAAGAAAAGCATCAACA	44
twist_4146	TAACAGGGAAGGGCACCCGA	943	twist_2410	GCACATAACCGTCATTCGAG	44
twist_3695	CCGAACACACCTCCAAGAAA	941	twist_4000	GCGTTGCAAGGTGATTTACG	43
twist_4110	CAAGGGGCCTAGGCTACAAG	941	twist_2570	CCTGACCTTCTCACATCCGG	43
twist_999	CAACTATCTCACCTGACGAA	940	twist_3051	CAAAACTACGTCTTTCCGCG	43
twist_1741	ACAAGAGCCCAAGTGAACGG	940	twist_1539	CCGTTGTGCCCCCCTACCAA	43
twist_2408	CCGCCGTCTATTACATTCAA	940	twist_3746	ACGCTGCTTCTACCAAGACG	43
twist_2671	CTGTAGCACGAGGAGTACAA	939	twist_2571	AGTGGCGGCCAGTTATGCAG	43
twist_2189	ACACTCGGCAGGTATATAAA	939	twist_2770	CCGAGCCGACACTAACACAA	43
twist_1962	CATCCGTCATCAACTACCAG	937	twist_4167	CCTGCCGTCATTATACACCA	43
twist_821	CAGACGAGATTCGCACGACA	936	twist_3120	AAAGTGAAAGAACATTTCGA	43
twist_3482	AAACAGGGAAGGGCATCCGA	933	twist_1029	ACACAGTAACCCCCTAAGAA	43
twist_222	CCTACCAGTGCACAGACAAA	932	twist_1768	GGTAGTGTCCCAGTGAAAAG	43
twist_601	CAGGGCCAAACCGTTTAAAA	932	twist_3441	CTGCCTGACCGGTCTCCCCA	43
twist_4002	CAGACCTTAAAAATACAGAG	932	twist_1261	CCACATTATGCCCATAACAA	43
twist_2959	CCACAAAAATAACTAACCAA	932	twist_684	CATGGTGATATTACGAACAA	43
twist_3953	CAACCAATTCGAAAGATCCA	931	twist_48	AATCCGGGCATAGCAAGGGG	43
twist_3582	CGAGACAATTTAGCTACAGA	931	twist_4020	ACTTCTGGTCATCTGAAACG	43
twist_3831	CCATCCCACCGAGATAGAAG	929	twist_1400	CGGACACGAAGGCTTTACCA	43
twist_2239	CCGGCACCCATTCATTAAGG	929	twist_2963	CCTACAATTGATCCTTGGCA	43
twist_2515	CGTAACAGCAGCATACTAAA	928	twist_3190	CGACTCTTTTTCCCGATGAG	43
twist_2871	CGTGACAGCAGCATATTAAA	928	twist_477	TGAAGGTACGTTCCATTGCG	43
twist_2978	CCAGGGTGTTTGAAATCAAA	927	twist_788	GCATTAGTACCAGTTCACGA	43
twist_1980	CTGCACGAAGGTCAACACCG	926	twist_4165	CCAAAGGTCACAACTTTCGG	43
twist_1156	CCAATGATCCTGTAACCGGA	926	twist_2408	CCGCCGTCTATTACATTCAA	43
twist_2806	CGAGACAGCAGCATACTAAA	926	twist_4204	GCACCGATAGGCAAGTCACA	43
twist_1944	CCGCAAGCAGCTGTAATCCG	926	twist_96	CGTGCCGGCCGGCCGATAAG	42
twist_71	CATCGGCAAATTAAACTGCA	925	twist_2509	ACGAAGGCAGTGCAGCTCAG	42
twist_311	CAAGGGGCCTAGACTACAAG	924	twist_1107	CTGGACCAAATGCCTCAAGG	42
twist_1952	CTAGTGACTGAAACGCCCGG	924	twist_1375	GGGAGCCTCCTTGCGCTACA	42
twist_1790	CCGCCCTCAGTCGTGTACAA	924	twist_325	AAACTGGGATCCTAGACCAA	42
twist_2346	CAACTCCGATCAGCAATGCA	924	twist_732	CTGGACGAACTACCTCTAGA	42
twist_3981	CAGTATTGTCATTCATAGAG	922	twist_2975	CAAGGGGCATAGACTACAAG	42
twist_3531	CGGCGATGAAGTAAAAGGGA	921	twist_3055	CATCCGTCATCGACTACAAG	41
twist_2627	GCACATGTAACGGCGTTAAA	921	twist_3389	CTTGCCATCCCGCATCCAGG	41
twist_159	CATCCGATCTTTAAATTCAG	920	twist_276	AGTACTAAAGATATTTCAAG	41
twist_1942	CGGGAAACAACCCTTTAACA	920	twist_3761	GGACAAAGATGGTTTATGAG	41
twist_1382	CAATCGGGAGTTCCTAACAA	920	twist_1345	GCTATGGGCGGTAATCTGCA	41
twist_360	CAGCGATATTGCGTGTGCCA	919	twist_3078	TGTCATACTTACAAACAAGA	41
twist_2478	CTGGTCACCTGGGCTCGGGA	919	twist_1841	CTGTCTACTCCACTTCAGAA	41
twist_3141	CCTACCAGTGCACAGACAGA	917	twist_240	CTAGTTCGTTGTGTGCGAAA	41
twist_104	CGGCCTCGATAACAGAGGCG	915	twist_54	CATCTTGATTGAGTGACCGG	41
twist_322	CAATTGGACCGCTATACCGA	914	twist_1568	GCTGGGAACCTGGCTATAAA	41
twist_130	CTACAGTAACAACTATAACG	914	twist_2134	CGACTCGAATCCGCGTAACG	41
twist_4041	CAACCAATTTGTAAGATCCA	912	twist_3159	CAAGGGATACCAATGCCCAG	41
twist_1207	CCGCACAACACAATTCTAGG	911	twist_1187	CCACACACCACAGCAATGAA	41
twist_3074	CAAAGTGACCGGTCTAGAGG	910	twist_3506	CGGCCTCGATAACTGAGGCG	41
twist_1132	GCAGCGGTTTTTGCAACGGA	909	twist_118	CCGGCACCCATTCATCAAGG	41
twist_2166	CATAGTGAACTCGTTTACAA	909	twist_2107	CCGTGCAATAGACCTATCGG	41
twist_111	CCAAACACTTGACATCCACG	909	twist_1847	CTGCTGACTTGCCTGAACAG	41
twist_985	CGTGAGGTTATGCAGAAGCG	908	twist_3778	TCTACCTGTGGTATGCTGAG	41
twist_3008	CAATGAAATCCCTCGCCGAG	907	twist_1895	CTGCGGATTTGACAATTGAG	41
twist_1445	CATACACTCGTATAACACCG	907	twist_1093	CCACTACCACCGACATCACG	41
twist_1680	CAGCGACTTGATAATTCAGG	907	twist_196	CTGGACCACATTGCAAGAGA	41
twist_563	CAGCGGTGCTACTAGACCAG	906	twist_1854	ACGGAACCTGTTCAGTGGAG	41
twist_4081	CCTACAATTGCTGCTTGGCA	905	twist_792	CGTGCGGGTGAACTGATAAA	40
twist_912	CGACTAGGACCAGTAAACGA	904	twist_4139	CAATGACCTATTGCACCGGG	40
twist_3846	CAGGAGAGCCGTGTGCCCAA	904	twist_3421	CTTTTCCAATAGCAGAAGAA	40
twist_3127	CAAACCTGCTCTGCATGCCA	904	twist_764	CCGAGGAGTACCGATATCAA	40
twist_48	AATCCGGGCATAGCAAGGGG	903	twist_3022	CGACTCAGCAAGACTTGAGA	40
twist_2770	CCGAGCCGACACTAACACAA	902	twist_335	CATTGACCCTTACTGTTCAA	40
twist_2922	CAATGGGCCCGGTTTTGAGG	902	twist_3618	CAGGAGAGACGTTTGCCCAA	40
twist_3799	CTATCACCCAATCCGTTACG	902	twist_585	GCAGTAAATGTGGTGAGAGG	40
twist_2286	CAACTCCAATCCGCAATGCA	902	twist_2813	CTAAGAAACAAACCATACAA	40
twist_2125	CCGGGTATACCACAATAACA	901	twist_2967	CCTGACCTCCTCGCATCCGG	40
twist_2689	CGGACTCGATAACAGAGGCG	901	twist_4080	CCGAGAACTCTCTCTAGCCG	40
twist_3878	CAGTCTCAAATGACACGGCA	901	twist_1327	CTGACGTGTGCACTGTGGCA	40
twist_3457	CCTACCAGTGCACAAACAAA	901	PDE8B_2114	AGTAATTGAGAGATACAAGG	40
twist_1454	CCAATCAGTGCAACGTACGG	900	twist_2721	CTGAGCAAACTCCAGTACAG	40
twist_1435	CATCCCCCAATTCTGCCCAA	899	twist_3238	CGTTACACCCCTTTATCGCG	40
twist_1276	GTGCACATATGGGCTAGGCG	899	twist_2630	CATCTAGATTGAGTGACCGG	40
twist_4169	CGAGCCTCTGACGAAAAAGG	899	twist_874	TGTCACGATAATTATAGGGA	40
twist_265	CCATCAAGACGTGATAGCAA	898	twist_863	CGATGAATAGGGACAATAAG	39
twist_460	CAAAGACAAACCCAAAAAAA	898	twist_3714	CTGCGGTCTCCCCAACAGGA	39
twist_428	CAAGCAATTCCGACGTACAG	897	twist_2449	CCTCAGGTCGTTCTTAACCA	39
twist_1231	CCGGGAACAAATCCAACAAA	897	twist_2200	CCGCCTGTATCCCTAAGAAG	39
twist_3644	CGAGCCTCTGTCGAAAAGGG	897	twist_995	TCGTGTCGACTGCATTAAGG	39
twist_372	CATAACACCAAGAAATTAAG	896	twist_1680	CAGCGACTTGATAATTCAGG	39
twist_2720	CAATCTCGTTAGAAACCCCA	896	twist_2671	CTGTAGCACGAGGAGTACAA	39
twist_1935	CAGAAACCCGGAGATCACAA	895	twist_401	CCGGCGACACAACCGATACA	39
twist_3168	CCGGGTCCTATAGTAAGCAA	895	twist_3424	CCTCATGAAGAACCAATACG	39
DPEP1_3656	CCAAACTGCTGTCAATGGAG	895	twist_3539	CCGTTCAACACGGTATTGCG	39
twist_1706	CGGCCGGACGGACAACCCCA	894	twist_3446	CGGGTCCATATTCCATCGGG	39
twist_981	GCGGGGTAAGTCCAGTAGAG	893	twist_3412	TTGGAGAACATATTAATCGG	39
twist_907	CAACCAAGTAATATGTAGCA	893	twist_3551	AATCCGGGTATAGCAAGGGG	39
twist_3567	CAGCACGGTTTTTATCACAA	893	twist_2372	CAAGGTATTAAGGCTAAAAG	39
twist_720	CTAGGTGGCGCAAAACGCAA	892	twist_4112	CATCCCGTTCGCTATTACAG	39
twist_741	CTACAAACCGGCCATAAAGG	892	twist_3562	AAAGGGATCGTGCTGCTAAA	39
twist_2473	CGGGCTTCATTCGCGCTGCA	892	twist_795	CTTCCTTATGCTCTATGCGG	39
twist_3672	ACTTGGGACGATGTAAAACA	891	twist_1650	CCTTACACCTGTACGATAGA	39
twist_4152	CCGTGTCGTTAATAAAGCGG	891	twist_121	CATCCTCGTATCCTGTGAGA	39
twist_3786	CAGTACCCCGCGATACCGAG	891	twist_3594	CTTGGTCAACGGTCGCTGCG	39
twist_3994	CTATGAGAACGTCTTACCGA	891	twist_4224	CCTGACCTCCTCACATACGG	39
twist_526	CGGGATACAAAACCACAGAG	891	twist_3647	ACTAGTAGCGTCCTTTGCGG	39
twist_23	CAGGCACCAAAAACAAACCA	890	twist_1791	CAGCCGATATCAAATTCAAG	38
twist_4126	CTATGGGAAATAAAGCAAAA	890	twist_3675	CTTCACGACCATCAAACCAG	38
twist_78	AGGGGCGGCCAGTTATGCAG	890	twist_113	CAATGGCTTACCATGTTAGG	38
twist_1550	ACACTCAACTAAGAGTTCAA	888	twist_3061	ACAAACACTTGACATCCACG	38
twist_206	CATAACCCAGGAATAAAAGA	887	twist_2125	CCGGGTATACCACAATAACA	38
twist_2333	CGAAACGACTAAATAAACGG	887	twist_3991	TCGCAGTCTGCTCCAATAAG	38
twist_1309	CCACCCAATTGCTATTCCAG	887	twist_3376	CTGCCCTCTGCATTGAAACG	38
twist_3150	CAAACAACAGTCCATTCGAA	886	twist_2253	CTGGCCCCCAAATTAATCCA	38
twist_358	ACGATAGCAGCAGTGCCGAG	884	twist_3117	ACTCCTCTAGGTACAAGAAA	38
twist_2582	CCTGCCCTCCTCACATCCGG	882	twist_417	CTTGGTCACCGGTCGCTGCG	38
twist_3849	CTACCCGTTCGCTATTACAG	882	twist_1973	CTGTGGATCCAATTTCTACG	38
twist_3862	CGTTAAAGTGTAGTGCTACG	882	twist_2800	ACTAGTAGCGCCCTTTGCGG	38
twist_1909	AATCACACACCACAATTAAA	882	twist_882	TAACAGGTCGGCGAATTCCA	38
twist_1954	CATTGGCAAATTAAACTGCA	881	twist_698	CAGTGACCAACCATTCGCCA	38
twist_299	CCGTGTCGTAAATAAAGCGG	879	twist_3184	CCGGGTACTAGAGTAAGCAA	38
twist_3184	CCGGGTACTAGAGTAAGCAA	879	twist_4164	CCGACGTATAGAACTCCCAA	38
twist_4066	CAAGTGACAGAAATGCTAGA	878	twist_4185	CCAGCGTTCCAGAAGACCGG	38
twist_419	CCAATCACATCTGATTCCGA	877	twist_2702	CGGATAAGCTTACTAAGGAG	38
twist_3571	CCGTTAGTATAAGAAAAGGG	877	twist_3277	GCACCCATAGGCAAGTAACA	37
twist_1181	CAGGACGATCTATCATACGG	876	twist_1901	AAGCAAGGTTTCTCTCCAAA	37
twist_1428	CCACAGGAATCCACGTTCCG	876	twist_3560	CTATTGGACCGCTATACCGA	37
twist_771	CAGCCCTAATTCTTGCCGAG	876	twist_2646	CCGGGGACCCGCATACACAG	37
twist_3318	GCACCCATAGTCAAGTCACA	874	twist_434	TCTAGCTTTCTTGATCACAA	37
twist_3960	CAACTTACCAGGCAAAAAGA	874	twist_1687	AATCAAGCCGGACCGAACCA	37
twist_3813	CCGACGGATAGAACTCGCAA	872	twist_3047	CAAGTGAGAGAACATTTCGA	37
twist_356	CCAATCGGAAGATAAATCCA	872	twist_3065	ACTTCTGGACATCTGAACCG	37
twist_2797	CCTAAGTGCTAATAAACACA	872	twist_2883	ACACTTAGAGATTAATGCCA	37
twist_2690	CAGGGAAACTGCGCTTGACA	872	twist_2758	TGGCCCTTTGTGTATTCAAA	37
twist_3317	CCAAACACTTGACATCTACG	872	twist_2893	CGTGACAGCAGCATACTGAA	37
twist_3580	CTAACAGACGTTACATCGAA	871	twist_2344	CATCTTGATTGAGTGACAGG	37
twist_2324	CGGGGCCCCCACCATTTAAA	871	twist_1675	TAAGGGGCCGCGGATAACAG	37
twist_649	ACATCCGGTGCTCAACGGAA	871	twist_1602	GTAGATCTCACCAAAACACA	37
twist_980	CAGCGACGTTTTAAGCAGAA	870	twist_2238	GGGTTTTACCACTTGACAAA	37
twist_3026	CAACATCCAGCCTTGTCGCG	870	twist_1382	CAATCGGGAGTTCCTAACAA	37
twist_2110	CCGTAACAAACCTCGCAAGG	870	twist_237	CTACTAGATTTGCTTCTGGA	37
twist_1061	TGTACGGGCTAATAAAGAGA	870	twist_3411	GGGCTAAACTGATCAACCCG	37
twist_837	CGTGCAGGCCCCTAATTGCA	870	twist_60	ACTACTGAAAGTACGAGCAA	37
twist_1307	CCGTCAGTCAGCTAGCGACA	869	twist_495	CTTCGGTGCTACAAGTGAAG	37
twist_2847	CAGTCCAAAATGACACGGCA	869	twist_679	AAATTGCACCAACAGTTCGG	37
twist_109	CTGTAACTCGATGCAATACA	869	twist_823	CTACCCGTACATATGTACCA	37
twist_2528	CGTGAAAGCAGCATACTAAA	868	twist_2204	CATAATATAAAAGTATTGAG	37
twist_2955	CCAGACATTACGTCGACCCG	868	twist_1468	GCTCCTCGCGATTCACCCAG	37
twist_1389	CTAGGTCACTCTCAATCAAG	867	twist_3518	CTAGTGCCAGAAATGCTAGA	37
twist_2000	CCACCCTAATACTAGTCACA	867	twist_3811	ACTGAGAATCTTCAGCCAGG	37
twist_1953	ACACGGAACACGAATCGAGG	866	twist_3548	CTAGCCTTAACCCAGCCGAA	37
twist_1373	CAGCATAACCAAACTCTCGG	866	twist_285	CCACTATGATTGAATATACA	37
twist_435	CAGCTAATCAGCATAACACA	866	twist_2115	CCTATGACCGCTACACCGGA	37
twist_3808	CAGATATCCAGTTCGCACCG	865	twist_2214	CAACCACGTCCGTCACTCGG	36
twist_1430	CCTGAGGATGGCTAACAACG	864	twist_1181	CAGGACGATCTATCATACGG	36
twist_329	CCGGGGCCCCGCATACACAG	864	twist_2263	ACTACACTCTATCCGCCCAG	36
twist_867	CTAGGATCACCTTATCAGAG	863	twist_2421	CCAGGCCCCCGGTATACCCG	36
twist_3070	CCAGGCACCCGGTATACACG	862	twist_1798	CAATCTTTTCCATCGATCAA	36
twist_3155	CAATCCGTTACGGCTCTGAA	862	twist_2750	ACAGGGGAAGGCAAGTTACA	36
twist_3553	AAACAGGTACCCAAGCAGAA	862	twist_3354	CAAAAAGACACCCCGCGCAG	36
twist_978	CATGATCTATAGATTACGCA	861	twist_4048	TGTACGGCATGAAATTGGGG	36
twist_2905	CCTCGAGCATTTATAAACGA	860	twist_3522	CCTTTAGTTCTAACAATGAA	36
twist_1732	CCGTGTGCTGAAATACTAAA	860	twist_990	AAGAACTCCAGTGCATCAGG	36
twist_1159	AGGGCGGGAAGAGCACTCCA	860	twist_2985	CAGTAATAAGCACCATTGCG	36
twist_3394	CGATCGATCACATCGCAACG	858	twist_3157	CATCTAAGAACCGCGTTACA	36
twist_1919	CCATCAAAACCTTCGCTCGA	858	twist_1444	ACTACCGGAGGTCCTAAACG	36
twist_927	CCGTTCACTGTGTATCAGAA	858	twist_4087	TCACCAAATCTAGATAAAAG	36
twist_251	CTGAGGGGCGGGAAGCGGCA	857	twist_4054	GCACTGGTAACGGCGTTAAA	36
twist_1600	CCACTCGAAATGCAATGCAA	857	twist_3913	CATATTACAGATTAAATCCG	36
twist_282	CTGCGGTCTCCCCAACTGGA	857	twist_2711	CTTTTCTACTATCTTAGAAG	36
twist_2325	CTGCAGGCTTTAAAGCGACA	857	twist_843	AATAAATCTGTCACAACAGA	36
twist_317	ACAGAAGCAGGCGCATTCAG	857	twist_890	CGGCGATGACGTAAAAGGGA	36
twist_3619	CAGACGTATAGAACTCGCAA	857	twist_1475	TAGATGTAAGACCATAACGA	36
twist_253	CCAGGTTAACAAAATTCGCA	856	twist_1741	ACAAGAGCCCAAGTGAACGG	36
twist_2066	CCAGCGTTCCAGGAGACCGG	856	twist_749	TCGGTGCCCATCATGAAGCG	35
twist_3274	CCAAACCCACCTCCAAGAAA	856	twist_372	CATAACACCAAGAAATTAAG	35
twist_278	CCAGCCCGAATATCGCCCCA	856	twist_1303	CGGTGGTCTTTGGAACCCAG	35
twist_172	AAGCGGGGTTGATAAAACAG	855	twist_3735	GATAGGTCTATTAAGTCGAG	35
twist_578	CTGCCAAACTAATCAACACA	854	twist_1206	CAGCCACGTGATATTATACA	35
twist_303	CCATCCCACCGAGATAAAAG	854	twist_2236	TAACAGGGAAGGGCATCCAA	35
twist_2999	CCGACTGTATCCCTGAGAAG	854	twist_1052	CGGCCTCTCATGCCTTGGCA	35
twist_472	GTACAGGTATATGTGAAGAA	853	twist_1145	CCACTGAGTTCACATCGACG	35
twist_4220	CAGATGTATTTGAAGCCCAG	853	twist_2355	CGGCCTCAATAACAGAGGCG	35
twist_2524	CAACTTAACAGGTAAAAAGA	852	twist_3358	CTTGGGCGACGTTTGTTCGA	35
twist_2599	CCTAGTGAAGAACCAATACG	852	twist_232	CGTCGATCAGAAAAGCTAGA	35
twist_4079	CGTGACAGCAGCATACGAAA	852	twist_1242	CAAGTTTGTGAACAGACCCA	35
twist_1655	CCGGCGATAGCATATCCAAA	851	twist_742	CGTACAGTCTGCACTTCGAG	35
twist_2188	CGGCCTGGCACCTTACAAGA	851	twist_779	CGTCCAAATATGAAGAGGCA	35
twist_882	TAACAGGTCGGCGAATTCCA	851	twist_2003	GCTAACCCTCCTAAGCTAAG	35
twist_944	CCGCTCTACTTCTCGCAAAG	851	twist_1385	CCTTGGTCAGGTATTCCCAG	35
twist_1895	CTGCGGATTTGACAATTGAG	851	twist_445	CCACATACATAATTTCTAGA	35
twist_4139	CAATGACCTATTGCACCGGG	850	twist_1918	CAAATGCTACGGCCTCTAAG	35
twist_2282	CGAAAAGGACCTAAATCCAA	850	twist_3230	CTGCCTGCCCGGTCTCCCAA	35
twist_307	CCAGCTAATACACATACAGG	850	twist_3145	AGGGGCCCTCTATTGCCGAG	35
twist_2701	CCGAAGGCAGAGCAGCTCAG	850	twist_664	ACACATCGCCTAGTAATCGG	35
twist_1211	CAAATCACACACAATACAGA	849	twist_108	TGATAAAGCAGGGCACTCAA	35
twist_2115	CCTATGACCGCTACACCGGA	848	twist_358	ACGATAGCAGCAGTGCCGAG	34
twist_2629	CGGGCTACAGCTGCAAGACG	848	twist_3580	CTAACAGACGTTACATCGAA	34
twist_829	CATGTAATTGCGAAGCCAAA	847	twist_505	AAGGTGATTTAGATACTCGG	34
twist_3161	CCGCCGTCTATTAAATTCGA	846	twist_2852	CAATTACCTATTGCACTGGG	34
twist_4052	CAACCAATTAGAAAGATCCA	846	twist_797	GTTCCGAGCATGCTGCAAAG	34
twist_3512	CGGGATCTCAGCAAGCCAGA	845	twist_3759	CAATTTATTTCACCAATACG	34
twist_635	CGTGCCTGAGACAAACCCAA	844	twist_3765	CTGTCCATAGGATTAAGGAG	34
twist_2113	CCGAAATTTCCATAACACGG	843	twist_3181	CGGTTCACATTTAATAAGAA	34
twist_1506	CCTCAAAACCGCAATCAAGA	843	twist_1244	CAGACCAGATTTACTCTGGG	34
twist_1411	CCGGAAAATAAGAATTAGAG	843	twist_4098	CCGAGAGCTCTCACTAGCCG	34
twist_3600	CAATCGGGAGTTACTAACAA	843	twist_2309	GCTAGCCACTACCAAACGCA	34
twist_772	ACGCGGCCCAGGATGTTGCG	842	twist_1307	CCGTCAGTCAGCTAGCGACA	34
twist_3906	CATCCGTCATTGACTACCAG	842	twist_248	CTGCGGCCATACCAACCACA	34
twist_1087	CAGGGCACAACGCATCACAA	842	twist_662	CAACGGGATCGCTCGATCAG	34
twist_3689	CCAAACATTTGACATCCACG	841	twist_3058	TGAAAAGACCATATACAGAG	34
twist_3408	CCAAACAGTTTCCATTCGGA	841	twist_1046	CCTCGAGCATTTATGAACGA	34
twist_1096	ACAACCTCCGGGTTAAAAAA	841	twist_745	CGTAGACACGACTCACAAGG	34
twist_3977	CATCCGATCTTTAAAATCAG	841	twist_1981	CGAGATGACACTGAGTGGCA	34
twist_1279	CTGAAGAACGACTAGTCACA	841	twist_850	AGGGCCAGCTACTATATCCG	34
twist_2613	CCGGGGCACCGCATACACAG	840	twist_2474	CGGGCTCCATTAGCGCTGCA	34
twist_3003	CAGAAGAGCCGTTTGCCCAA	840	twist_3541	CAGGGAGCCTGGTCGTTGCG	34
twist_856	GCAGAAGGTAGTAAGCCAAG	840	twist_2821	ACGACGCTTCTACCAAGACG	34
twist_1377	CAAACTGTAAGCGCACAGAA	840	twist_4169	CGAGCCTCTGACGAAAAAGG	34
twist_4207	ACGGAAGCAGGCGCATTCAG	839	twist_2629	CGGGCTACAGCTGCAAGACG	34
twist_4226	CGAGTTAAACGACCACAGGA	839	twist_2484	CATATAAGAACCACGTTACA	34
twist_2957	GCACCCATAGGCAAGTCAGA	838	twist_2498	AGTACTAAAGATATTTAAAG	34
twist_1622	CTGGAAACCAGGTAAACCCA	838	twist_289	CTAGAGCTCCCGCCAAGCAA	34
twist_3370	CCTGCTCCTGATCATATGGG	838	twist_4222	CTGACCTAAGCAGTGTGCAG	34
twist_1012	CTTGCACCAGAGCCGACAAA	838	twist_1262	GCACCATATGGCTTTAGGAG	33
twist_4068	CCTAATCACTCCTTTTCGGG	838	twist_146	CCGCCTGTATCCCTGAGAAG	33
twist_1205	CATGCAAGTGACCAGACGGG	837	twist_1965	ATAATGGATACCTAAATGCG	33
twist_768	CCAGTGGCATCCCAGACACG	837	twist_2861	CCTATCGTTTGAGCGTAGCA	33
twist_3491	TAGGGAAACTGCGCGTGACA	837	twist_1041	GCGACTCTCCAAAAGCGCAA	33
twist_1880	ACTACGGAAGCCTTGAGCAA	836	twist_3333	CGGGCTGCATTCGCGCTGCA	33
twist_2566	CAAACCTGCTCTGCGTGACA	836	twist_630	CCATCTCCAACCTCTAGACG	33
twist_2868	CAGTTGCACGAGGAGTACAA	836	twist_945	TGAGCCCATTAACCTCCGGA	33
twist_1355	CTAGGCACAAATTATATACG	836	twist_2582	CCTGCCCTCCTCACATCCGG	33
twist_3113	CAGACTCGTTATAAGATAAG	836	twist_2639	CTTCCCGTTCGCTATTACGG	33
twist_3090	CTTAAATGCATTGAAAACCG	836	twist_491	GTACGTAACCAATTGCCCCA	33
twist_1697	GCGGCCGACACTGTACAGGG	836	twist_3871	CGGTCTGGCCCCTAGATAGA	33
twist_3162	CCGACCATTTTTCCAAGGGA	835	twist_3902	GAACTGATTGCGAAGAAAGG	33
twist_1799	CGACCCGGCGGCCAACTGAA	835	twist_1676	AGGACGTCTTCCGCAATACA	33
twist_3164	CGAACACATGGATAGACAAA	835	twist_1691	GCTGAAACATGATCGCCACG	33
twist_195	CGTCAGGCCAGAAAGACGAG	835	twist_456	TAGAAACAAGCCCTGACAGG	33
twist_1473	CCTGTACCAGAGAAATGCGA	834	twist_814	ATGACTAACAGGCCAACCAA	33
twist_966	CCACCTTAAACTCCTACCCA	834	twist_820	GCTGGTTCACCGTAGCTAAG	33
twist_1929	AGGCGCCAAAGACCGTCAGG	833	twist_1590	ACGTTAGCATGGTATCGAGG	33
twist_2614	CATAGTGAACTTGTTCACAA	833	twist_4023	CAGTATAACCTAGAGAACGG	33
twist_989	CAAGTCAACTCTGTGACGGA	832	twist_3514	CGAGCCTCCCATGAGTCACG	33
twist_891	CGGCGGCGAAGTTTACCAAA	832	twist_3191	CTGATGTATTTTAAGCCCAG	33
twist_1527	GGAGAACATACAGATTGGAA	832	twist_1555	CGTCATATCCGCGCGAACAG	33
twist_3244	CCACGCAATCCAGATAAACA	832	twist_785	GCGTTGCAAGTTGATTTACG	33
twist_2752	CAAAGAAATCACGTGAGAAA	831	twist_1548	CTACAGACTTGGGTGCGAAA	33
twist_3865	ACTGCAAACGATATACCGGG	831	twist_160	GCACATGACCGTCATTCGAG	33
twist_1262	GCACCATATGGCTTTAGGAG	830	twist_986	CAAAACCACACTGCGCCCAG	33
twist_2561	CGAGCTGGCGAGCATTAGAA	830	twist_926	CATGTTTGCACGATGCAGGG	33
twist_2855	GCGCGACGTAATCTGCCAAG	830	twist_1085	GGGTGAACCACGGTTTGACG	33
twist_1439	CCAGGCTCCACCTCTTCAGA	830	twist_870	CAAATCCTCAACTATCGGCG	33
twist_2026	CCGTGATATTACGATACGCA	830	twist_4066	CAAGTGACAGAAATGCTAGA	33
twist_3095	CCAGATAACGAAATTTACGG	829	twist_2041	CTAGAAAGTGAGACGTACAG	33
twist_1258	CTGAGGAGTTGCTCGAGACA	829	twist_152	CTGTATCTACGCCAATAGGA	33
twist_1217	ACTGAGAGAAACCCAAGGCG	829	twist_1347	CAGAATATAACCTCTCAAAG	33
twist_3012	CCTCAGGTCGATCTTCACCA	828	twist_940	CGGCCGACACCCGAGTCCCA	32
twist_3249	CCGAGAACTCTCACTAGACG	828	twist_828	CTAAGGCACTCCTATAGCCG	32
twist_632	CTGAGGTAAGAAAATCAAAG	827	twist_1428	CCACAGGAATCCACGTTCCG	32
twist_3767	CAGTTACAAATAGAATCACA	826	twist_1177	CGAGTCAATTCCGTTCAGCG	32
twist_2816	CTATCGGCAGTCCATTTACA	826	twist_144	CAACTCCGATCCGCAATGCA	32
twist_2015	CAACTCACTGCAGTGCCCGG	826	twist_2262	CCTGCCGTCATTATTTACCA	32
twist_2379	GGTAGTGCCAATTCACGGGA	825	twist_598	CTATCACCCGCGATGATCAA	32
twist_1958	GCACACAACTCTCTGTACCA	825	twist_2631	CCGAAGGCAGTGAAGCTCAG	32
twist_2885	CGATAAATAGGGACAATAAG	825	twist_1647	CGTCTCGTCGACGTGCAACG	32
twist_1671	CAAGCTGGCCAAATATCACG	825	twist_3377	CTATCTCCCTCTTCATCACA	32
twist_1467	CGTACGAGATTTAAAAAGAA	825	twist_3678	CGTTTGAGCTATCTTTACCG	32
twist_2311	CAATCAACCCAATCGAGAAG	824	twist_134	CTGAAATTTCCATAACACGG	32
twist_1434	CATACAATCACGGAGATGAA	824	twist_3417	TCGGTCCTTATCGCGAGACA	32
twist_2236	TAACAGGGAAGGGCATCCAA	823	twist_654	CTAACAGGACAAAATCTCCG	32
twist_3345	CGAACTACATACTAACCGAG	823	twist_1853	GTAACTCCCCCAGATTAAAG	32
twist_324	CTAACAGACGTTACATCAAA	823	twist_3941	CGTTATATCGCTACTTAAAA	32
twist_3990	CTGGCACTACCACAGTCAGA	823	twist_4083	ACTACACTCTATTCGACCAG	32
twist_873	CAAGAAGGCCCCGATTAAAG	822	twist_4006	CCTACCCCACCAAAATCCCA	32
twist_2341	CCAGGGTGTTTAAAATCCAA	821	twist_2157	CGTCCGTGTTACATACCAAA	32
twist_1668	CCATCTACAGCGTTGCCGGG	821	twist_3185	CTTCCCGTTCGATATTACAG	32
twist_2704	CATCCGTTATCGACTACCAG	821	twist_28	TAGGGCCCTGCGTTAATCGA	32
twist_680	GCAAAGGGAGAGTCTAAAAG	820	twist_3398	CATTGACCCTTACTGTTAAA	32
twist_2805	CAAAACGACTGAATAAACGG	820	twist_2989	AAGGATAAAGCAGTAAACAA	32
twist_2894	CCGACGTATAGAACTTGCAA	819	twist_4178	CCTGCCAACCATATACGCCG	32
twist_2622	CGTGACAGCATCATACTAAA	819	twist_300	GTTGCCTAATGTAAAACCCG	32
twist_3587	TGAGCAGGACCAGAGCCCCA	819	twist_3671	GAGCCGCGATTTGCTCCGAA	31
twist_1227	CAATGTTTTGTCACACCAGG	818	twist_3782	GGGGGTCGCTTCAATTTACA	31
twist_3259	CCATCAAGACGAGATAGCAA	818	twist_3334	CTGAGCAAACTCCAATCCAG	31
twist_473	CTACCCATCCGAATTTGCGG	817	twist_3017	CCACTACCCGTGTTTTACGG	31
twist_2951	AGGGGCGGCCAGATATGCAG	817	twist_1559	CCAGGATAATACCATCCAAA	31
twist_1301	CTGAAAACTAGATAGACGGG	817	twist_282	CTGCGGTCTCCCCAACTGGA	31
twist_4179	CGGCAACAATCGTAACTCGA	817	twist_3676	CTGATGATTACCTTGAGGAA	31
twist_4230	CAGGCACCAAAAACAAGCCA	817	twist_1157	CGACGTACCACACAACCACA	31
twist_2011	CTTCACCGCCCAAAAAAAGA	816	twist_2788	ATGGCACTACCACAATCAGA	31
twist_2576	CGGCCTAGATAACAGAGGCG	816	twist_213	CAGGTATTAGAACTATACAA	31
twist_675	CAAACCTGCCGATCGTGAGG	816	twist_3079	GGACCAGAAAGTGAAACCCA	31
twist_394	CATGACAGTTCAGCAATCCG	816	twist_3552	CAACGGGTCTCTACATACAA	31
twist_1777	CGAAGGACTGAGCATCCGGA	816	twist_158	ACACCTCAAAACACGCCGAG	31
twist_270	CTATCAGGACCTGCAAGGCA	816	twist_1822	AATGTAACTTCTGTGAAAAG	31
twist_1346	CCGTTCAACACGGTATCGCG	816	twist_2955	CCAGACATTACGTCGACCCG	31
twist_2371	CCATAGTCCCTAAAGCAGAG	816	twist_1363	CTGACAGATGACGCACCAGA	31
twist_91	CCGAATAACCGTCAAAACCG	815	twist_4001	CTGCCTGTTGCCAAGAGCAG	31
twist_3682	CTGCGGTCTCCCCAAATGGA	815	twist_1894	CTGCGACAAGAGCAACTAAG	31
twist_1342	CAACCTTGCCATATGTCGGG	815	twist_4158	CCGTAGACCTGACTTCTACG	31
twist_1829	CCGTAAGCCTCGCATTAACA	815	twist_1182	CAGTAACCCCCGACATGAGG	31
twist_361	CGGATCTGTGCGGTGCGCGG	815	twist_2842	CCATGGATACCAATGCCCAG	31
twist_4080	CCGAGAACTCTCTCTAGCCG	815	twist_663	TTGGTAATACCCCTTTGGGG	30
twist_337	CCGAGAACTCTCACTAGCCG	815	twist_2737	GCGGTTTGCAAATTGTAAGG	30
twist_3708	CCTGCAATTGCTCCTTGGCA	815	twist_1076	CATTAGACCGGTATTAGCAA	30
twist_2560	CGTGACAGCAGAATACTAAA	814	twist_1576	CCAACGACTAACCTGCGGGG	30
twist_371	GAAAGTCATGACAATAACAA	814	twist_2340	GCAACGTCTTATGAGAGCAG	30
twist_414	CTGCAGGCTTCAAAGCGACA	814	twist_3727	CTGGACACTCTATCACCGGA	30
twist_1653	ACGGGCCATGACCTAACGGG	813	twist_1124	TTAGGGATCTACGCTTCCAA	30
twist_3922	CAATCTCGTTAGTAGCCCCA	813	twist_2556	ACTAGAGACTGTGTTCGAAA	30
twist_3811	ACTGAGAATCTTCAGCCAGG	813	twist_290	CGGATCAGCTTACTAAGGAG	30
twist_2982	CGGCCTCGATATCAGAGGCG	813	twist_3757	CTGTAATGTTTATTATGCCA	30
twist_530	CTAGCACTAGGGTATATCAG	812	twist_1163	AGGGCTAACGTCGAGTCAAG	30
twist_3492	CAACTTACCAGGTTAAAAGA	812	twist_3667	GTTACAATACCACTGTCCCG	30
twist_3197	CCTACCAGTGCACTGACAAA	812	twist_1834	GATGTACTACGTATGCACGG	30
twist_2544	ACTCGAGACTGTGTTAGAAA	812	twist_3764	TAGGGAATCCCTGTGCGAGA	30
twist_793	CAGAACCCAAAGCTTATGAG	811	twist_2775	CAGATATCCAGTTCACCCCG	30
twist_4094	ATGAACAGCTTGGAAACGAG	811	twist_3416	CGGTGGCCTCCTACTAGAAG	30
twist_1206	CAGCCACGTGATATTATACA	810	twist_2688	CGTCTGAATGATTCTTGAAA	30
twist_996	CAGGGTGCCCATTCTAGGGA	810	twist_2705	CAGGGAAAATGCGCGTGACA	30
twist_689	CGTGACACCAATTATACCCA	810	twist_2043	TATTCCGCACGGCCGTACCA	30
twist_1565	CAGTACCCCGCAATACCGAG	809	twist_1919	CCATCAAAACCTTCGCTCGA	30
twist_2140	CTGGCAGTTTCACAGATGCA	809	twist_4068	CCTAATCACTCCTTTTCGGG	30
twist_2183	CTAAAAAACCTGTTTCAGGA	809	twist_2608	ACGACCCTTTTTCCAAGGGA	30
twist_2630	CATCTAGATTGAGTGACCGG	809	twist_768	CCAGTGGCATCCCAGACACG	30
twist_2039	ACAGGCTCACACTTTCAACG	809	twist_886	GCGCTCCTTTGGACTACAAA	30
twist_381	CATCCATCACTCCCGACGCA	808	twist_1522	CTACCGATAAGTATATGACG	30
twist_1408	CCTACTTGCGGAAAATTGCG	808	twist_1397	CTTCTATGCTACACGCTCAA	30
twist_2343	CAGGCACAAAAAACAAACCA	808	twist_525	ACTGCATCTGCCCTTCACGG	30
twist_338	TGTGCAGGACCAGAGCCCCA	808	twist_3600	CAATCGGGAGTTACTAACAA	30
twist_934	CTACCACGCCGGCTTCACCA	808	twist_4168	CAACGCCCAACTCAGAGGAG	30
twist_1867	CAACGTGCAAACGAGACGAG	807	twist_4186	CGGAGGCCTCCGACTAGAAG	30
twist_178	CATCCGTCATCGACTACCAG	806	twist_4198	CATATATTCCAATCGTACAA	30
twist_3679	CCAAAAAATAGCATAAGAGG	805	twist_1563	CCGGACTTCCACCTGACCCG	30
twist_1504	CGTTAAGCCGACCCTTAGAA	805	twist_575	CTATAGACAGACCCTTGACA	30
twist_3115	ACAGGGTGTTTGAAATCCAA	805	twist_2213	GAGGCTACTGATCTACAAAA	29
twist_805	CTATAGGGACTGGAGTACAG	804	twist_3445	CAGAAATTTCCATAACACGG	29
twist_1739	ATACAGGTCAGAGAGCGCGG	804	twist_706	CGTGACCATCTTGATTCGCG	29
twist_2084	CTACAGACACGTGATTGGCG	804	twist_179	TTAACCCCTGTAACACCCCG	29
twist_1545	CCACAGATACCCTCATGAAA	803	twist_1876	TCTCGGAATAGTTAACCAGA	29
twist_3988	CTGATAGAACACCCAACACG	803	twist_479	AAGCCCCTTGTCGCGATCCA	29
twist_1363	CTGACAGATGACGCACCAGA	803	twist_1949	TCAGTTCACGACCCGCTACA	29
twist_2214	CAACCACGTCCGTCACTCGG	802	twist_2652	CCTGCCAACACTATACGCCG	29
twist_3442	CAAGAAACCAACCCACCAAA	802	twist_1591	GCTTCGGATCTACCTTTAAA	29
twist_917	CAAGGTAATACGGATCGAGG	802	twist_931	CGGGATCTCTGCAAGCCAGA	29
twist_3543	CAGATATCCAGTTCACAACG	802	twist_1997	CGATACCTCCCCAATAGCCA	29
twist_3820	CGAGATTGAAACGAGCTACA	802	twist_3353	CAACCAATCTGAAAGATCCA	29
twist_2353	ACACTTGGCAGGTATATGAA	801	twist_2662	CAAGTGAAAGAACATTTCAA	29
twist_2578	CGGGCTCAAGCTGCAAGACG	801	twist_3368	CTAGACATTACATCGACCCG	29
twist_953	CTACTGACATTTGCGCTGGG	801	twist_1119	CTTCTCATTTACAAGTACGG	29
twist_2474	CGGGCTCCATTAGCGCTGCA	801	twist_519	GGGGCCGGATTGGCAATAGA	29
twist_3300	ACAGGACACGTTTTTATGAG	800	twist_2990	ACTCGAGACTGTGTACGAAA	29
twist_399	GCAAAACTCGGTATGTCGCA	799	twist_1398	AGAAAGTTTACGAAGACAAA	29
twist_1300	CGACAGGCACGACTAACCGA	799	twist_2315	CTGAGCAAACTCCAGTCAAG	29
twist_700	CTAAAGTATTGTCCATGAGG	798	twist_1940	CGGCGGAGCGGTCCACAGCG	29
twist_4180	CCGTAGACCTGACTACTAAG	798	twist_1105	CAATTGCCCATTGTTAGACA	29
twist_4183	CGGCCTCGATAGCAGAGGCG	797	twist_490	CTTGGGCATCCGCCTTAAGA	29
twist_1447	GCTACCGGATAAGAGTCCAG	796	twist_3904	ACGCCGCTTATACCAAGACG	29
twist_205	CATGATGAACGTGATCACAG	796	twist_1961	ATGAGGAACCGGATTCGAGG	29
twist_119	CTACACACCCAACAGTTCAA	796	twist_1891	GAACAATGAAGATAACCCGA	29
twist_4153	CTTAAGGACGAAATATGACA	796	twist_1436	CTGAATAAAGACTAAAGACA	29
twist_3519	CATCCATCACTCCCAACGCA	795	twist_3200	CGATGACAAATCGATCTCCG	29
twist_323	CCGACGTATAGAACTCGCAA	795	twist_499	CCGCCGTCTATTACATTCGA	29
twist_2196	CATCTTGATTAAGTGACCGG	794	twist_1053	AAGGGGTTTACATCGACCAA	29
twist_2662	CAAGTGAAAGAACATTTCAA	794	twist_3819	CGGAGTGTATTTTATTCCAG	29
twist_1824	GTACCGGTAAGCGCATCAGA	794	twist_3602	GTTCCAAGCATGCTGCAAAG	29
twist_619	CCATAGTCCCTGAAGCAGAG	794	twist_730	GTATCACAATGTTCTAGGGG	29
twist_1981	CGAGATGACACTGAGTGGCA	794	twist_3000	TGTGCAGGACCAGAGCCACA	29
twist_547	TTGTGGGTCGGTAAAAGGCA	793	twist_3637	CTAAAATTACACCAACCAAG	29
twist_1940	CGGCGGAGCGGTCCACAGCG	793	twist_91	CCGAATAACCGTCAAAACCG	28
twist_4071	CTTAAACGCATCGAAAACCG	793	twist_3289	TATTCAATTATACTTCCGCA	28
twist_986	CAAAACCACACTGCGCCCAG	793	twist_1314	CATATTACAGATTTAATCCG	28
twist_1489	ACTATAGCCACCAAATAACA	792	twist_2351	CCTGACATCCTCACATCCGG	28
twist_158	ACACCTCAAAACACGCCGAG	792	twist_2863	AGACTACCCTGAAATTAACA	28
twist_1103	CAACCATATCCGGTGCAGAA	792	twist_201	CAGGAGAGCCGTTTGCCCAA	28
twist_3957	CAATTGACCCACTAGCAGGA	791	twist_3042	GCACTTGTAGCGGCGTTAAA	28
twist_1218	CCGGATAGTTGTCTGACGCG	789	twist_2110	CCGTAACAAACCTCGCAAGG	28
twist_355	CCATAGGCCACGATAAGAAA	789	twist_3521	CCTACAAATCGGGCGAGACG	28
twist_2964	CTGAGCAAACACCAGTCCAG	789	twist_2454	AGAGCCTCCCATAAGTCACG	28
twist_1153	CTATCGACCACCGTTTTGGG	789	twist_3792	CGTGCATTTGCATTGTTCCA	28
twist_3631	CTGCCCTCTGCAATGAAAAG	789	twist_1921	ACTCCCATTACTAAATGGGG	28
twist_110	CTGCCCTCTGCAATGAAACG	788	twist_918	CAAGGGTGACCGCATCGGGA	28
twist_2619	CGATGCTAAGCACTGTGAGA	788	twist_744	CGTCTGAATGATTCTCGAAA	28
twist_3360	CATACAAATAAATTACAAAA	788	twist_3103	CATACAATCACGGAGATAAA	28
twist_1868	CATCTTGCATACCTGAAACA	787	twist_1546	CCTTCGGTAGGTGAAACAAG	28
twist_1221	CCGAACCCACCTCCAAGAAA	787	twist_904	ATGTCAGGCGGTCCAAGCAA	28
twist_3368	CTAGACATTACATCGACCCG	787	twist_3894	GCTAGCCCCTACCAAACGAA	28
twist_461	CCATCCATAACACTGTCAGG	787	twist_1137	CAAATGTTCCAGAATACGAG	28
twist_745	CGTAGACACGACTCACAAGG	787	twist_593	TAATGAACCCCAATACCGAA	28
twist_231	CAGTCCCAAATGACACGGCA	786	twist_461	CCATCCATAACACTGTCAGG	28
twist_1684	CAATACGATGCTCCGACGAG	786	twist_2685	AATCCGGGCATAGCAATGGG	28
twist_2824	CTAATACTTAGGAAGCAGAG	786	twist_782	CAGTCCCACACTCCGTTCCG	28
twist_3652	CTAGCGTTAACCTAGCCGAA	785	twist_3045	CGAACTACATCCTAACAGAG	28
twist_3908	CCTCCCAGTAATACGTTGAG	785	twist_3168	CCGGGTCCTATAGTAAGCAA	28
twist_28	TAGGGCCCTGCGTTAATCGA	785	twist_1951	CCACAAGAAAATAATCAACG	28
twist_1737	CGAGTTTGCTCGGCGAACAA	784	twist_2495	GCGCGCTCCAAATAGCAACA	28
twist_1193	CCTCCAGGCTGCGCTATGGG	784	twist_609	GTGACGACAATGGTACGCAA	28
twist_2818	CAGGGTCCTAGAGTAAGCAA	784	twist_3196	GTTTCAGGATTTCTTCGAAA	28
twist_3854	CTGCGGTCTCCTCAACTGGA	784	twist_4207	ACGGAAGCAGGCGCATTCAG	28
twist_2588	CCAACAACAGTCCATTCAAA	784	twist_4081	CCTACAATTGCTGCTTGGCA	28
twist_3541	CAGGGAGCCTGGTCGTTGCG	784	twist_4097	CGGGCTCCAGCAGCAAGACG	28
twist_2742	CATCCTCGTATACTGTGAGA	783	twist_1075	CAGGTAACTTTTTCTCCCGA	28
twist_2927	GCTCCCATAGGCAAGTCACA	783	twist_604	CGTCGCAAACAACAGAAGGG	28
twist_1883	CAGCTAGACTAATCAACCAG	783	twist_3226	CTATCTTGCTCCCCGTCCAA	28
twist_2338	CTGAGCAAACTTCAGTCCAG	782	AVPR2_2241	ATACTTCACGGCCCGACACA	28
twist_3098	CAATCGGGAGTTTCTAACAA	782	twist_2988	CTGCGGTCTCCCAAACTGGA	28
twist_537	CAAGGTATTGAGGCTAAAAG	781	twist_197	ATGAACGCCGCAGCTAGCCA	28
twist_2961	CCACATACATAATATCTAGA	781	twist_3263	ATGATGATTACCCCGAGGAA	28
twist_1948	CATCGACCCGCCGCAAAGAA	781	twist_3010	AAACCGGGCATAGCAAGGGG	27
twist_2899	GAGGCTACTGATCTACCGAA	780	twist_1328	GCGGATCAATAACAGTACAG	27
twist_2253	CTGGCCCCCAAATTAATCCA	780	twist_903	CCAAGAAACCGTGTGCCGAG	27
twist_2908	ACGCTTAGAGATTAATGCAA	780	twist_3276	GAGCACCCTGTACAAAACCA	27
twist_3471	ACAGGACATTGGAAAAGAGG	780	twist_2742	CATCCTCGTATACTGTGAGA	27
twist_410	CCTCCGTTCACAGATACCCG	779	twist_2648	CGATAATAACCTCCACAGAG	27
twist_906	CCTCAAGGTCCCCCATAAAG	779	twist_104	CGGCCTCGATAACAGAGGCG	27
twist_798	CAATGTGAAAAATATATACA	778	twist_1253	CGAGCTCACCCAAAACCCGG	27
twist_645	CCATCCAACACGCATCCAAA	778	twist_373	CTTGGTCTTACCCCGTCACA	27
twist_1244	CAGACCAGATTTACTCTGGG	777	twist_680	GCAAAGGGAGAGTCTAAAAG	27
twist_3932	CTGGCACTACCACAATCGGA	777	twist_37	CGATGGATCACATCGCAACG	27
twist_1970	CAAAAAGTAAGTCAACCACA	777	twist_1355	CTAGGCACAAATTATATACG	27
twist_4050	CCATAGGCAGGGCTTCTGGA	777	twist_3467	CCGAGCCGATAGCTGCCAGG	27
twist_2617	TAAAGACTATGACCACACAG	777	twist_2889	GGACCTGAAAGTAAAACCCA	27
twist_2247	CAACTTACAAGGTAAAAAGA	777	twist_2275	CAGATATCCAGTTTACACCG	27
twist_2167	CCGCGGCTCAACTTACTAAA	776	twist_1668	CCATCTACAGCGTTGCCGGG	27
twist_2534	CTGGACACTGTATTACCGGA	776	twist_3402	CCGGCACCCATTCATCTAGG	27
twist_3787	CGATGGGCCCGGGTTTGAGG	775	twist_1617	GCAACTTGTCGTGCGCCCAG	27
twist_3714	CTGCGGTCTCCCCAACAGGA	774	twist_3892	CTGAGGAGTTGCTTGAGACA	27
twist_2312	CAAGTAACTGAGGAACTAAA	774	twist_2522	ACTATTCCTTACAAGTAAAG	27
twist_2972	CCAAACACTTGACATTCACG	774	twist_2923	CCAACGTCCGACCAACGCAG	27
twist_650	CCACACATTTATATTTTGCG	773	twist_2828	CTTCTTTAACCTATACGGGA	27
twist_598	CTATCACCCGCGATGATCAA	773	twist_1739	ATACAGGTCAGAGAGCGCGG	27
twist_365	CGACTCCGCAAGACTTGAGA	773	twist_299	CCGTGTCGTAAATAAAGCGG	27
twist_283	AGGGACGTTGCGGCATTACA	773	twist_1861	CCTGCCCCACACGAATGCAA	27
twist_1776	CCTAGAGAATCAACTTTGAG	773	twist_3052	CCGACGTATAGAACTAGCAA	27
twist_1280	CGACAGATTCCAACACTCAA	772	twist_3917	GCACTTATAACGGCGTTAAA	27
twist_321	ACAACCTGACCTGAAAGCGG	772	twist_3480	GAGTGATCCTCCATTAAACG	27
twist_4005	CATCCTCGTATCTTGTGAGA	772	twist_3487	CAATGCCTTACCATGTTAGG	27
twist_1951	CCACAAGAAAATAATCAACG	772	twist_2345	CAATGACAAAACGATCTCCG	27
twist_1645	CTAGGAACCGACGCGCCCCA	772	twist_90	CGAGCCTCCCATAAGTCACG	27
twist_1252	CCTCACGCTTCCAAAAGAGG	771	twist_2805	CAAAACGACTGAATAAACGG	27
twist_3955	CAAATATGCTCAACGATACA	771	twist_4050	CCATAGGCAGGGCTTCTGGA	27
twist_1021	CATGTCGAACCGATTCCCGG	771	twist_2704	CATCCGTTATCGACTACCAG	27
twist_3974	CCTGACCTCCTGACATCCGG	771	twist_599	CTGCTCGATAGTGAGCCCAA	27
twist_258	CATGCGACCCCTGATACGCG	771	twist_581	CGGAGTGTAATTTATTCCAG	27
twist_1677	CAACTGATATAAGTATGCCA	771	twist_2971	CCTAACCTCCTCACATCCGG	27
twist_1110	CATCTAGACAGACCTCCAAA	771	twist_1534	CGACTGTATTAACTGACAGG	27
twist_244	CTTAGAAGTCATATTAGCGA	770	twist_3572	CGGCAATGACGTAAAAGGGA	27
twist_2685	AATCCGGGCATAGCAATGGG	769	twist_2651	CATACTCGTTAAACGTTGAG	27
twist_2956	CCAGGTTGAAACGAGCTACA	769	twist_337	CCGAGAACTCTCACTAGCCG	27
twist_445	CCACATACATAATTTCTAGA	769	twist_1417	AGACGTAATTTGCATAGAAA	27
twist_1871	TAGCGAGGCCCTTTGCTGAA	769	twist_2441	CATCCTTGTATCCTGTGAGA	27
twist_2867	CTAACAGACGTTACATAAAA	768	twist_2242	CAATTTATTTACCTGTCCAG	26
twist_1477	CCAACGCATATTACACTAGA	768	twist_3318	GCACCCATAGTCAAGTCACA	26
twist_2857	ACTGGTAGCGACCTTTGCGG	767	twist_3044	GTTCATCACACCACATGCAG	26
twist_764	CCGAGGAGTACCGATATCAA	767	twist_3805	CAAGAGCCAGAAATGCTAGA	26
twist_2893	CGTGACAGCAGCATACTGAA	767	twist_573	AATAAGCCTCCCCAGCTGAG	26
twist_1002	CGTACAACTGCCTATTACGA	767	twist_2794	CATACTCGTTGAACGTTAAG	26
twist_1734	CCATCCGGATTCCTATAGGA	767	twist_1788	CATCGCAAAGAACCGTGGCA	26
twist_277	CAACCAATTTGAAAGATCCA	767	twist_2660	CAATGAACTATTGCACTGGG	26
twist_3169	CCGGTTCAAGCATTAAAAAG	767	twist_3085	CAAGTTCGTTGTGTGCGAAA	26
twist_562	CCAACAACAGTCCATTCGAA	767	twist_1967	CAGCTCGTTGGACAGCGAAA	26
twist_2440	CCGCGCCAACACTAACACAA	767	twist_1170	TGAATGCCAAAGGCACCAGG	26
twist_4055	CTACATACACGACATTCCAG	766	twist_112	CCACTCCCCGTGTTTTACGG	26
twist_3104	CCGGGTCCTAAAGTAAGCAA	766	twist_3378	TTAACCTGTGAGTAGCCGAG	26
twist_2128	CGAAGAGGACTATAACGGGA	765	twist_3388	CCTACTCCTCAATTTCCCCA	26
twist_2736	CCTCAGGTCGTTCTTCGCCA	765	twist_3873	AGGGATAACGCAACTAACGG	26
twist_2606	CAAACTACATCCTAACCGAG	764	twist_635	CGTGCCTGAGACAAACCCAA	26
twist_665	CGAAGTGACCGGTCTAGAGG	764	twist_3124	AATATCTAACCTAAGTTGCA	26
twist_3527	AAACAAGGAACGCTTCCGGG	764	twist_274	AATAAATGTCTTGAGAACCA	26
twist_1120	CCTACCCCACCGAAATCCCA	764	twist_3919	TAGGATAAAGCAGTTAACAA	26
twist_2506	ACTGTAAACGATATACAGGG	763	twist_2164	TTTTATGATAACACTTTGGG	26
twist_2	CCTGCTCCTGGTCATATGGG	763	twist_2179	CTAGACATTACGTCGCCCCG	26
twist_4222	CTGACCTAAGCAGTGTGCAG	763	twist_534	GCATAATTTACACAAACAGG	26
twist_2315	CTGAGCAAACTCCAGTCAAG	762	twist_305	TATGTGGGCCGCACAACCCG	26
twist_1589	CGAGGTGGCATACTTCGAAG	762	twist_2278	ACTGCATCTGCCCTTTACGG	26
twist_2873	TAGGGCCCTGCGTTAAACGA	761	twist_2165	CTAAGCAAACTCCAGTCCAG	26
twist_1028	CAGGGCCCAACCGCTTCCAG	761	twist_4069	AATCCGGGCATAGCAAGAGG	26
twist_290	CGGATCAGCTTACTAAGGAG	761	twist_924	CATATGTTCTTATTTCCGAA	26
twist_3797	CGTTACCGAGCCCCTCCCAG	761	twist_35	ACTAGTAGCGACCTTTGCGG	26
twist_2138	CCATCCCTCTAAACTATAAA	761	twist_4210	CGGATCAGCTGACTAAGGAG	26
twist_683	CGGCCGTCCCCGAAAAGGGG	761	twist_3557	CCAACAACAGTTCATTCGAA	26
twist_3048	GCACATGAACGTCATTCGAG	761	twist_3433	CATACTAGAGTAGATACGCG	26
twist_3590	TAACAAGGAACGCTTCTGGG	761	twist_1267	GGACCGCTAACCTTGCCCCA	26
twist_1033	CATCCACATGCTCCGCAGAG	761	twist_4122	CAATGACGTATTGCACTGGG	26
twist_125	GCACCCATAGGCAAGTCACA	761	twist_1619	TGGTTGAAAGTGAAACAGGA	26
twist_1795	CGAGGAACCACCCTTACACG	760	twist_794	CTATTTTAACCCCCGCCGCA	26
twist_656	CGACGACGAATCTTTTGCAG	760	twist_1456	CCTTGACCTTCATAAAGGGG	26
twist_2507	CGATAACAAAACGATCTCCG	760	twist_224	AGAGGCTCACATTCACCGCG	26
twist_1480	CGGTAAGTAATGCTTCCGCA	760	twist_4180	CCGTAGACCTGACTACTAAG	26
twist_732	CTGGACGAACTACCTCTAGA	760	twist_99	CCGCGGCTCAACTCACTAAA	26
twist_1557	GCAGCAAGACCTTTTTCACG	760	twist_695	CCTGTTGCCGTCGCGTTACG	26
twist_3583	CGATGGGCCCGGTTTTAAGG	760	twist_2049	GTACTACCTGATGTGCAGGA	25
twist_1797	CCGGTATGAAAGTAGTCCGA	760	twist_972	AAAGTTACCTTGGAACTGCG	25
twist_1016	CTAGAATTACACCAACCAAG	760	twist_2079	CTGACCATTCCGTTATCACA	25
twist_1740	TAAGGGCAAGAAACATCAAA	759	twist_1543	CTTACATGAATCGAGTGCAG	25
twist_2356	CTAACAGACGTTACATTAAA	759	twist_3686	CGATGGTCCCGGTTTTGAGG	25
twist_3833	GGGCAGACACACCATCTGGG	759	twist_2866	CATCCGATCTTTAAATTAAG	25
twist_147	CCACTGGGACCCTTGTGCCA	759	twist_2917	CTAAAAGACGTTACATCAAA	25
twist_3642	CATACAATTACGGAGATGAA	759	twist_251	CTGAGGGGCGGGAAGCGGCA	25
twist_144	CAACTCCGATCCGCAATGCA	756	twist_2342	TTTAAGAACATATTAATCGG	25
twist_3901	ACGGCTTATTACACATGCAA	756	twist_1219	GGACTCTTCCTCTTTTTCGA	25
twist_184	GAATGAAACACGACATAACA	756	twist_2657	TAACAGATCCCACTTTCAAG	25
twist_2299	CCTGCTCATGGTCATATGGG	756	twist_3606	AGGGGCGGCCAGTTATGCGG	25
twist_3371	CAACAAATTTGAAAGATCCA	756	twist_3458	CTGATGTATTTCAAGCCCAG	25
twist_1971	GAGAGCTTTGTAACAATCAA	756	twist_1390	TCTTCTCCCATGACTCACAG	25
twist_4112	CATCCCGTTCGCTATTACAG	756	twist_1825	TCGGGGATATCGTTTCTGGA	25
twist_884	CATGACACAGAACTAATGAG	755	twist_1835	CTGCCCCCCGGACTTAAAGG	25
twist_569	CGAAACACATTCATGTAACG	755	twist_3980	GTAATCCGAGATATTCGACG	25
twist_2995	CGGGGCCCTTACCATTCAAA	755	twist_3935	AAGCGTATACGCGTGAGGAA	25
twist_2092	GCGGTAGTACGTTCAAGAGA	755	twist_2394	TAAAGGTACGTTCCATTGCG	25
twist_57	CAATGACCTATTGCACTGGG	755	twist_1838	GTAGTGAAACCGTCTCAGGA	25
twist_140	CTGCCCCGTACGGCTATCAG	754	twist_1156	CCAATGATCCTGTAACCGGA	25
twist_2925	CCGCTAACCCATATGCTCCG	754	twist_3982	ATGGACCGTTTGCCTCTGCG	25
twist_1483	CAGATCCGCCTTATGTCAAG	754	twist_3160	CCTGCTGCTGGTCATATGGG	25
twist_196	CTGGACCACATTGCAAGAGA	754	twist_3484	ATTGGTACTCCGGTATCAAG	25
twist_249	CCAAAGAGATTCATACAGAA	753	twist_739	TCGGTCTTACAGTTAATAGG	25
twist_2058	CCAATTACTAGTTTGAAGAA	753	twist_531	GAATCAGATATCTAGTGAGA	25
twist_3655	GAAGAGGACCTATCAACAGG	752	twist_4032	CTGAGTGTAATTTATTCCAG	25
twist_3658	CCAAATCACTCCTTTTCGAG	752	twist_3512	CGGGATCTCAGCAAGCCAGA	25
twist_2678	CTGGCCCACAAATCAATCCA	752	twist_1638	CAGAATCATGATCCAACCCA	25
twist_2842	CCATGGATACCAATGCCCAG	752	twist_451	ATAGGGACTGAGTAGACAAA	25
twist_1399	CGGTTCGGCGACCCAATCAA	751	twist_3204	CCATTGCACCTCCCTCAGGG	25
twist_2160	CATGATAAACGTGATCACAG	751	twist_3335	TATTCAAATATGCTTCCGCA	25
twist_831	CGAGACCCATAGTATTAAGA	751	twist_1037	CCACACCACATGACAATCCA	25
twist_2045	CCAACACGAAACTATAGGAA	750	twist_944	CCGCTCTACTTCTCGCAAAG	25
twist_833	CGTACTGATCTTACAAGGGA	750	twist_412	GGAAAATAAAATCTACGGCA	25
twist_103	CTATATGAATAACCGCGCGA	750	twist_3554	CAGGGAAACTGCGCGTAACA	25
twist_199	CGGTGGCCTCCGACTAGAAG	750	twist_4111	CGGTTCGGCGCCCCAATCAA	25
twist_2646	CCGGGGACCCGCATACACAG	749	twist_404	TCAAGTAAAGGTGTGCACAG	25
twist_2355	CGGCCTCAATAACAGAGGCG	749	twist_1557	GCAGCAAGACCTTTTTCACG	25
twist_3909	GCGTTGCAAGTTGATTTAAG	749	twist_3581	TAACTCATCAAGCATCCCGA	25
twist_801	CATTACCTAATCATGAAAGG	749	twist_3234	ACTACACTCTATCCGAACAG	25
twist_3640	CGATCTCTCCCGGTATAACG	749	twist_4208	CGATATTGACCTCCACAGAG	25
twist_1210	CCTGCAATCCTTGAACCGAG	748	twist_2155	CTGTACCGCTTGAAACGAAG	25
twist_531	GAATCAGATATCTAGTGAGA	748	twist_20	CTGAGCAAACTCCAGTCCAG	25
twist_1518	CAGCACACAATCCTTTTACA	747	twist_1695	ACGTTAAAAATCGTAACGGA	25
twist_3445	CAGAAATTTCCATAACACGG	747	twist_3841	ATGTCAGGCGGACCAAGCAA	25
twist_3578	ATTAACAATATTCAACACAA	747	twist_3280	CAATGACCTAATGCACTGGG	25
twist_1802	CTTGCAATCAAAATTACCGG	747	twist_3264	AAACAGGTAACCTAGCAGAA	24
twist_603	TCAGGGTGCTCGTTGTCGGG	746	twist_2767	TGAAAAGAACATCTACAGAG	24
twist_4100	ACTTAGGCAGGGCTTCTGGA	746	twist_4042	CTTGTGTAATGTTAACCCAA	24
twist_869	CCTGTGTACATTCCATTGGA	745	twist_1969	CCTCCCTCAATCCCACCCAG	24
twist_667	CAAGAAACCATCCCACCAAA	745	twist_1570	AATAGGGCTCCTATAACACA	24
twist_407	CAATGGCATCCCGCGTGGAA	745	twist_3300	ACAGGACACGTTTTTATGAG	24
twist_3681	CATACCAGTGCACAGACAAA	744	twist_3039	GAGGCCCAAACCTCACGCAG	24
twist_2641	CTGCCCTCTGAAATGAAACG	744	twist_261	TTTACCTTTCCATATACGCA	24
twist_2607	CAGTGATAAGCACAATTGCG	744	twist_87	CCTATCAGATTACAGATCCG	24
twist_263	CTACCTAAACCCAAACGGGA	744	twist_1372	TATACCTTTCCCACGTCCAA	24
twist_1370	CAAAAGTGAATCCCGACCGG	744	twist_2120	CTAGCCTAAGCCGCATGCCA	24
twist_1787	CCTAACCTAAGCCATCAGGA	744	twist_948	CTGACGAGTACTGAGTTACA	24
twist_1224	CATGCTGATCTATCGCTGCA	743	twist_3337	CCTCAAGCATTTATGAACGA	24
twist_3402	CCGGCACCCATTCATCTAGG	743	twist_3352	CATCCGACATCGACTACCAG	24
twist_4096	CGGTTCGGCGACACAATCAA	743	twist_1756	TGGGGTTGTTTACTGCAAGG	24
twist_216	AAGCGGACACAACCAACCGG	743	twist_1701	GCGTGCTTCGGGACATACGG	24
twist_3268	CAACCCTGCTCTGCGTGCCA	742	twist_2034	CTAGGCAATGCTCTTCTACG	24
twist_3785	AGAGAAAACCTACCACACCA	742	twist_3842	AGGGGCGGCCTGTTATGCAG	24
twist_2533	CCAAACACTTGACATCAACG	742	twist_1320	GTAAGCTATACCCTGCAACA	24
twist_2660	CAATGAACTATTGCACTGGG	741	twist_3923	TGTAACCTCACGTTACGAAA	24
twist_246	CCAACTCTAATGTTGCTCAA	741	twist_306	CTAATCCTTGTGTCACAACA	24
twist_3198	CCGACGTATAAAACTCGCAA	741	twist_3475	CGTCCTTGTTACATACCGAA	24
twist_640	CCGGTTCAAAATAAATTCAA	741	twist_3953	CAACCAATTCGAAAGATCCA	24
twist_1374	CAAGCAAAATTTCTATTGAA	741	twist_2598	TGGGGCCCTCTATTGACGAG	24
twist_609	GTGACGACAATGGTACGCAA	741	twist_2084	CTACAGACACGTGATTGGCG	24
twist_664	ACACATCGCCTAGTAATCGG	741	twist_1250	TAAGCTAACTGCCAGAGAGA	24
twist_3664	CCGACCCTTTTACCAAGGGA	740	twist_1012	CTTGCACCAGAGCCGACAAA	24
twist_1745	GCTGCATGCGAACATTAGGA	740	twist_2205	CATGATATAAAAGTATTAAG	24
twist_740	CTACTTAACCTACCGCCACA	740	twist_3499	CTATTGGCTACTTCAATGAG	24
twist_1733	TGGCATTAAACACAACCACG	740	twist_3175	CTGCCTTGCTACAAATGAAA	24
twist_1782	CAGGTACCCCCAACGAACAA	740	twist_687	CGTGCCCGACTCTTTAAAGA	24
twist_4197	CCTACCAGTAATACGTAGAG	740	twist_1266	CATGTAGTATATGTTATGGG	24
twist_1515	GTGTAGGGTCAACTTAAAAG	739	twist_2532	CCAAGAACTCTCACTAGCCG	24
twist_3121	CAGCCCTCTGCAATGAAACG	739	twist_275	CTGATAGAACACCCAACCCG	24
twist_163	CTGGCACTACCACAATCAGA	739	twist_3638	AGGAGCCTTCCTTTTTTAGA	24
twist_2313	CTGACAGCCAGCAAATAAAG	739	twist_500	CCTCTCGCCAGCCATCTCAA	24
twist_450	CATCGAGCCTTAAAATGCAA	738	twist_3492	CAACTTACCAGGTTAAAAGA	24
twist_72	ACGCTTAGAGATTAATGCCA	738	twist_3197	CCTACCAGTGCACTGACAAA	24
twist_3247	GCTAGCCCATACCAAACGCA	738	twist_3534	ACTGCATTTGCCCTTCACGG	24
twist_3045	CGAACTACATCCTAACAGAG	737	twist_1603	CAGACTCGTCATAAGATAAG	24
twist_3557	CCAACAACAGTTCATTCGAA	737	twist_3493	CATCCGTGTTACATACCGAA	24
twist_2624	CTGACAGACCGCAAATAAAG	737	twist_1110	CATCTAGACAGACCTCCAAA	24
twist_3280	CAATGACCTAATGCACTGGG	737	twist_111	CCAAACACTTGACATCCACG	24
twist_636	CCATAAACATCATCATAGAA	736	twist_1744	CATATCCTTAAGAATTAGCA	24
twist_2470	CAGCGGCTCAACTCACTAAA	736	twist_3259	CCATCAAGACGAGATAGCAA	24
twist_809	CAAGGAGGAAAACCAAGACG	735	twist_3228	ACTCGAGACTGAGTTCGAAA	24
twist_193	CTGATGTATTTGAAGCCCAG	735	twist_3582	CGAGACAATTTAGCTACAGA	24
twist_1502	TATGCAGGAGTAACAATCCA	735	twist_1358	CGTTGTGGCAAATCTACCAA	24
twist_1693	CGAAGACTCCGACAATACAA	735	twist_913	CTACGCACCCCATAGCTGCA	24
twist_4151	CAAGTTACACGACCACAGGA	735	twist_1015	CTAAAAAGCCTTGCGATGGG	24
twist_68	ACAAGGCAAATTTAAACAAA	734	twist_2487	GAGGCCCAACCCTTACGCAG	24
twist_389	TAGCACAAACAAGCAAGGAG	734	twist_3566	CCTATGCAACTTTATACCAA	24
twist_3930	CTACATACACAACTTTCCAG	734	twist_2524	CAACTTAACAGGTAAAAAGA	23
twist_190	CTGCACTACCATTAGACCGA	733	twist_294	GCTACGGATTTCCAATAAAG	23
twist_2675	CAAATACCTGGCCAGCAGCA	733	twist_1875	CTAGGCCCCTGCATGAAAAA	23
twist_2270	ACGCCGCTTCTACAAAGACG	733	twist_2858	CTTGGTCTTACCACGTCACA	23
twist_804	CCATACGTTCTAAATTGAAA	732	twist_3301	GGGTTGCCCAAGCCGCACAA	23
twist_3079	GGACCAGAAAGTGAAACCCA	732	twist_2561	CGAGCTGGCGAGCATTAGAA	23
twist_1865	ACACATAACCGATTGTACAA	732	twist_348	CCAATACTTTCGGTTACGGA	23
twist_52	CCGTGATGCCCATTACACAA	731	twist_64	CGTTACCTCACGCATTCAGG	23
twist_1317	CCTCTAGTTCTAACAATGAA	730	twist_174	CAATGTTTCATTGATTGCAG	23
twist_1666	CTAGGAATTCACTCAATCAA	730	twist_437	AGTGAAAACCTACCACACCA	23
twist_2457	CAAACCAGCTCTGCGTGCCA	730	twist_2334	CCATTTGAAAGAACTAGGAA	23
twist_3551	AATCCGGGTATAGCAAGGGG	730	twist_4107	CATGATCTATAGATTAAGCA	23
twist_153	CATTGAAATCTGTAGTGACA	730	twist_3089	CAGGGAAACTGTGCGTGACA	23
twist_1572	CTGGCTCCATATTTGTGAGA	730	twist_2131	CTATTGGCTACTTTAATAAG	23
twist_1679	ACTACGGAAGCCTTGAGCGA	729	twist_2900	CAGGAGAGCCGATTGCCCAA	23
twist_1816	CTGAACAATTACCATTTCGG	729	twist_1366	CCTTGTGCCGGGCATCCAAG	23
twist_1164	TAGCCACCCAGGGATTCACA	729	twist_2669	CGAGCCTCTGTCAAAAAAGG	23
twist_2007	CATTCGATAACCAAACCCAA	729	twist_3846	CAGGAGAGCCGTGTGCCCAA	23
twist_1080	GTGCGAAACAGCAAACCAAG	729	twist_3090	CTTAAATGCATTGAAAACCG	23
twist_2801	CATTGCCCCTTACTGTTCAA	728	twist_2908	ACGCTTAGAGATTAATGCAA	23
twist_2151	GGAACATATCCGGAACTGAA	728	twist_1109	CAGCGGTTATTTCCTCCCCG	23
twist_4077	ACAGGACGTTGATAATACAA	728	twist_340	CTTAAATATTCGCTGCGGAA	23
twist_129	CCAGTATGTTCTCCTAAGAG	728	twist_3283	CGTTCCGTTACGGCTCTGAA	23
twist_3756	CAATAAACATCATCATAGAA	727	twist_1415	GTTATACACATGTAGAGGGG	23
twist_1649	CATCATGTATACACATCAAG	727	twist_2266	ACTACACTCTATCCAACCAG	23
twist_849	CCTAAATATCGCCCTACACG	727	twist_4012	CAGTGAAACTGCGCGTGACA	23
twist_2917	CTAAAAGACGTTACATCAAA	726	twist_1464	CCTTGCCTAGTATTGCGACA	23
twist_1444	ACTACCGGAGGTCCTAAACG	726	twist_1349	GAGAGCTCACCTTCTCCCAG	23
twist_1717	CCTACGTTAGAAATAAGCCA	725	twist_1067	GGGCTGAACTGATCAACCCG	23
twist_1192	CAAGAGCTACAATAAACGAG	724	twist_2511	ACGCCTGTATCCCTGAGAAG	23
twist_1228	CATTGTCTAACGGAGTAAGA	724	twist_2716	CGGCCTCGATGACAGAGGCG	23
twist_3305	CGATGTCCACCATAGCGACA	724	twist_3048	GCACATGAACGTCATTCGAG	23
twist_2749	CTGTGTGCTAGGGCTTTAAA	724	twist_2438	CTGGAACCACTACATTAAAG	23
twist_3347	ACGCCGCGTCTACCAAGACG	724	twist_2999	CCGACTGTATCCCTGAGAAG	23
twist_1107	CTGGACCAAATGCCTCAAGG	724	twist_3235	TAGGGCCCTGCGGTAATCGA	23
twist_3881	AAAACCTGTGAGACGTTCGA	724	twist_713	ACAGGACATGGGAAAAGAGG	23
twist_2911	CCAACGTATAGAACTCGCAA	724	twist_4170	TGTTCAGGACCAGAGCCCCA	23
twist_443	TGTACCCGTGCACCGCGGCA	724	twist_3640	CGATCTCTCCCGGTATAACG	23
twist_2112	AGATAGGGCAGGGTTTTACA	724	twist_3242	CAATGGCATACCATGTTAGG	23
twist_3952	AGTGTCGCACCACAACCCAG	724	twist_641	AGGGTGTCAGCCGATTACCG	23
twist_4149	CCGGGTCCTAGAGTATGCAA	724	twist_2329	CCGTTCTTTATTGCTTGCAG	22
twist_3876	CCTCAGGACGTTCTTCACCA	723	twist_1578	TCTAAGTCCACACAGTCAAA	22
twist_3539	CCGTTCAACACGGTATTGCG	723	twist_700	CTAAAGTATTGTCCATGAGG	22
twist_516	CTAGTGTCCCTTGAATAAGG	723	twist_980	CAGCGACGTTTTAAGCAGAA	22
twist_687	CGTGCCCGACTCTTTAAAGA	723	twist_1376	AAACAAAGACGTTTGTAGGA	22
twist_3214	CGTCAATCAGAAAAGCTAGA	723	twist_3584	CTTAAAACATGTGCTACGAG	22
twist_1873	CAGCACCCTACTGATAGGGA	723	twist_3112	ACTTTTCCTTACCAGTAAAG	22
twist_3950	CTGTGACATCGTTAGTGCAA	722	twist_1407	CAGCACAACTAGGATAGACA	22
twist_1810	CAGACCTTAAAATTACAGAG	722	twist_2244	CAATACAATTTAGCTACAGA	22
twist_1580	CGATCCATACGACAGATAAG	722	twist_537	CAAGGTATTGAGGCTAAAAG	22
twist_3437	CGGGCTCCAGCTGCAAGAAG	722	twist_4154	CGTGACATCTCCACTAACGG	22
twist_3996	CAGTGTCGTTGCGTTTTGAG	722	twist_3383	CCTTGCCAAACGCCTAAAAG	22
twist_2703	CGGTCTCCAGCTGCAAGACG	722	twist_1435	CATCCCCCAATTCTGCCCAA	22
twist_3645	CAATAGCTTACCATGTTAGG	722	twist_183	CATTTCCATAAAGTTCTCAA	22
twist_2328	CTAGCCTTAACCTAGACGAA	721	twist_1164	TAGCCACCCAGGGATTCACA	22
twist_807	CCGAAAAAAACGTTGCGGAA	721	twist_1616	CGAGACCTACTAATTTCAGA	22
twist_4150	CCACATTATGCCAATAACAA	720	twist_4063	AAATCAAGATCTTAACAAAA	22
twist_2016	CGATCAGATGTCACACTCAG	720	twist_2249	GCACATGACCGTCATTTGAG	22
twist_1708	TAGGGACGTACAGAGTCAAG	720	twist_2798	CTATATTAATAACCGCGCGA	22
twist_3789	CCTAAAAATAGCATAAGCGG	719	twist_92	CGATGCTAAGCCCTGTGAGA	22
twist_3674	CGGCCTGGCACCTCTCAAGA	719	twist_3850	ATAATAACCGTGTATTTAAG	22
twist_1404	ACTTGGGACGATGTAAGACA	719	twist_1002	CGTACAACTGCCTATTACGA	22
twist_468	CCATTGGGATGAGTTCAGCA	719	twist_2159	CCAAAGGCAGTGCAGCTCAG	22
twist_1888	CAAACATGCCATCTAAGGCA	719	twist_2587	CATCTAAGAAACACGTTACA	22
twist_4157	CAAAGGCTTACCATGTTAGG	719	twist_1481	ATTTAAGATTGGCAATCAAA	22
twist_3832	CCTCCACATCACCCTTTAGA	718	twist_1138	CAGCATCAACCGATATAGCG	22
twist_2279	CCACATACATAATTTTTAGA	718	twist_501	CGTTAAAGTGTAATGCTACG	22
twist_3384	CAGGCTACTGATCTACCAAA	718	twist_1043	AAAGGGCGAGCCCTGAAACA	22
twist_3738	CCAATAGGAAGATAAATCCA	717	twist_2392	CGTTTTTATGATCAATCCCG	22
twist_1643	CATAAATTACTGATTACAGG	717	twist_2464	CATACAATTGCTCCTTGGCA	22
twist_592	CGTGTAATATTCAAGACAAG	717	twist_1760	TGATTCTGATGTCAAACAGG	22
twist_418	AAAACACACTGGTAACGCGG	717	twist_3942	CGGTTCTTTATTGCTCGCAG	22
twist_4091	CCACAGTCATGCTCTCAGGA	717	twist_356	CCAATCGGAAGATAAATCCA	22
twist_508	CTTGGAGACAGTGCGATCCG	717	twist_2014	CTACCCAGCATAATTACCAA	22
twist_75	CTGCCTGTTGCCAAAAGCAG	716	twist_406	CGATCCGTTACGGCTCTGAA	22
twist_2187	CCGCGGCTTAACTCACTAAA	716	twist_799	CTACTTCCTCTTTAACCCGG	22
twist_924	CATATGTTCTTATTTCCGAA	716	twist_10	CGATGTCCACCATAGCAACA	22
twist_1835	CTGCCCCCCGGACTTAAAGG	715	twist_362	ACGGAAAACTCCGCTTTAGG	22
twist_782	CAGTCCCACACTCCGTTCCG	715	twist_786	CATCACGGTGCACCAAGGAG	22
twist_1436	CTGAATAAAGACTAAAGACA	715	twist_2964	CTGAGCAAACACCAGTCCAG	22
twist_4025	CGAGTTACACGACAACAGGA	714	twist_1809	AAAGCACACAATCAACGGCA	22
twist_3431	CTGAATAAAGAATAAAGACA	714	twist_2103	CCATCACATACCCTTACACG	22
twist_3684	CCTCCACAACACCCTTTCGA	714	twist_1747	CCAACAACTATCCTATTGCG	22
twist_1271	CATGGTCGTTGGTTTTCGAA	713	twist_4126	CTATGGGAAATAAAGCAAAA	22
twist_1465	CAAATCGGCCCGAAGACCCA	713	twist_205	CATGATGAACGTGATCACAG	22
twist_1168	AGACACAGTCTGACGTTACG	713	twist_936	CCAGTGAAAACACTTTTCAA	22
twist_1115	CATAAATCTGGTCAAAACAG	713	twist_562	CCAACAACAGTCCATTCGAA	22
twist_1079	CCACATTCCATTTCTCGAAG	712	twist_3096	GCACCCAAAGGCAAGTCACA	22
twist_2395	CAAACCTGCTATGCGTGCCA	712	twist_3414	GAGGCCCAACCCTCACGCGG	22
twist_1466	CGATACATACACTATAACGA	712	twist_2478	CTGGTCACCTGGGCTCGGGA	22
twist_3819	CGGAGTGTATTTTATTCCAG	712	twist_1920	CATCTCTGATGACCGTTCAG	22
twist_555	AAACTCATAAGGGCATTGCA	712	twist_1742	CCGCAACGATCATAGTCGAA	22
twist_3270	CTATAACAATCAGCGCCCAA	711	twist_2136	AATACAACACTTAAAACCGA	22
twist_1270	CATAATGAACACCTACCGAA	711	twist_1878	CTGCCCCTAATCGTGCAGGG	21
twist_1410	CAACTTTAAACCACATTGGA	711	twist_669	CGGTTCCCATTTAATAAGAA	21
twist_787	CCATGACCATGCGCGCCCAG	711	twist_2635	CCGGAACCCATTCATCAAGG	21
twist_1148	CCACATCGTTGTATGCAGAA	711	twist_3670	CTGGAGAGCCGTTTGCCCAA	21
twist_498	CGTAGTTCCCCACAAAAGAA	710	twist_3672	ACTTGGGACGATGTAAAACA	21
twist_827	CGAAAATTACCCCTATCAAA	710	twist_2445	AATGTCTAACATAAGTTGCA	21
twist_1162	GTACACACAGAAGCATTCCA	709	twist_838	ATGGAAACACGCTTTAAGGA	21
twist_227	CGAACTCTCCCGGTATAACG	709	twist_603	TCAGGGTGCTCGTTGTCGGG	21
twist_106	GGATACCCAGGTAATCACCA	709	twist_1227	CAATGTTTTGTCACACCAGG	21
twist_1422	CCATGGGTCCCAACTAAAAG	709	twist_3843	AGTCCGGGCATAGCAAGGGG	21
twist_2785	AAAGGGATAGTGCTGCTCAA	709	twist_3800	AATACACTCTATCAGACCAG	21
twist_2947	CGATACGTTACGGCTCTGAA	709	twist_288	AGTTCCATAATGGCGTTCCG	21
twist_890	CGGCGATGACGTAAAAGGGA	709	twist_2578	CGGGCTCAAGCTGCAAGACG	21
twist_213	CAGGTATTAGAACTATACAA	708	twist_256	CTATCGGCAGTCCATTTCCA	21
twist_1807	CTACCCCTCAATATAAGAAG	708	twist_3825	CTATCAGCAGTCCATTTCCA	21
twist_2105	CCAGGCCCCCGGTATACACA	708	twist_2072	ACTCGAGACTGTGTTCAAAA	21
twist_585	GCAGTAAATGTGGTGAGAGG	708	twist_2002	TGGCAGAATTATTTGTAACA	21
twist_484	CTTAAATGCATCGAAAACCG	708	twist_3897	AATTCGGGCATAGCAAGGGG	21
twist_697	CAGCGTCCCGAGGAAACGCA	707	twist_3909	GCGTTGCAAGTTGATTTAAG	21
twist_405	CCAACCCCTACCCAATGACA	707	twist_3165	AAACAGTCATGCTCTCAGGA	21
twist_2499	CGATCCGTTACGGCTTTGAA	707	twist_443	TGTACCCGTGCACCGCGGCA	21
twist_3407	CGTTACCCCCCTTTGTCGCG	707	twist_530	CTAGCACTAGGGTATATCAG	21
twist_3630	AATCCGGCCATAGCAAGGGG	707	twist_3155	CAATCCGTTACGGCTCTGAA	21
twist_2814	CCTGACCTCCTCACATTCGG	707	twist_1117	TCGCCCTCAATGGAAAAGAG	21
twist_19	CAAACCTGCTCTGCGTGCCA	707	twist_4011	GTAGCTTATGCTCCTATCCG	21
twist_2163	CAGATAGCCCCTTTGACAGG	706	twist_3	CTAGCCTTAACCTAGCCGAA	21
twist_1419	GCATCGAAACAGCCTTAGCA	706	twist_2401	CATAACACAAAGAAATTAAG	21
twist_3171	CAAGATATAAAAGTATTGAG	706	twist_2402	CATCTTAATTGAGTGACCGG	21
twist_2919	CCGACCCTTTTTACAAGGGA	706	twist_2614	CATAGTGAACTTGTTCACAA	21
twist_529	GCGCTGTCACTGGTGTGGGA	705	twist_2806	CGAGACAGCAGCATACTAAA	21
twist_1353	TGGTCGCGTAGTTAGCAACG	705	twist_4041	CAACCAATTTGTAAGATCCA	21
twist_3140	CAAGTGCCAGAAATGCTAAA	705	twist_968	TCATGACTACCCGTAATGCA	21
twist_527	CTGTTCACAGGGGTGCAAAA	705	twist_1084	ACTTACTCAACTTATTGCCA	21
twist_699	GCACCTTGCAACACATTGGG	705	twist_1010	CAATTCTGATGTCTAAGAGA	21
twist_2345	CAATGACAAAACGATCTCCG	704	twist_686	CCTGAAGCCCGGATGACGAA	21
twist_3485	CCTGCTCCTGGTGATATGGG	704	twist_1641	ACACCCTTCTAATCTAGACA	21
twist_1963	GATCCGCATACTGAAACGGA	704	twist_313	CGTTAGCGACGATAACTCGG	21
twist_3505	CAATGACCTATTGCACTAGG	703	twist_1332	CGTGTATATACGCCGAGGAG	21
twist_1339	CAGTACCCCAAACAATCCCA	703	twist_1842	CCGTCGAAATTTACTCAACG	21
twist_1312	CCACATTAATCTACAAAGAG	703	twist_1298	CCAGGAGGTCGGAAGCTCAA	21
twist_2651	CATACTCGTTAAACGTTGAG	703	twist_3631	CTGCCCTCTGCAATGAAAAG	21
twist_1985	CGGTAAAGCCCCGTAACCCG	703	twist_3249	CCGAGAACTCTCACTAGACG	21
twist_3617	CTGAAATCTCCATAACACGG	703	twist_2412	AAGCATAAATGTTATAGCGA	20
twist_2862	TAGGGCCCAGCGTTAATCGA	702	twist_2068	CGACTACATACATTTACACG	20
twist_485	AAGCAGCACAAAACGCTCAG	702	twist_3652	CTAGCGTTAACCTAGCCGAA	20
twist_4054	GCACTGGTAACGGCGTTAAA	702	twist_3907	CAAGGTCCCAGATTTATACA	20
twist_1770	GCTGCGTACATACCTTTGAA	702	twist_2515	CGTAACAGCAGCATACTAAA	20
twist_2192	CATCCTCACAAGTAAAAAAA	702	twist_175	CGTTGCAAACCACTACTACG	20
twist_2340	GCAACGTCTTATGAGAGCAG	701	twist_4232	CATACTAGTTGAACGTTGAG	20
twist_2985	CAGTAATAAGCACCATTGCG	701	twist_2181	GCAGACCTTTAATCTTCAAG	20
twist_2669	CGAGCCTCTGTCAAAAAAGG	701	twist_3734	CCGCACGAACCAGAATAGAG	20
twist_2780	CAATTGACACACTTGCAGGA	701	twist_106	GGATACCCAGGTAATCACCA	20
twist_1673	AATCAAGCAGCTCTTCGGGG	701	twist_2187	CCGCGGCTTAACTCACTAAA	20
twist_925	ACGTGCATAACACCATTACA	701	twist_1408	CCTACTTGCGGAAAATTGCG	20
twist_606	CAACTCCAAATTGTGCTCAG	700	twist_1571	TGGTTTGGAGGCAAGTGACA	20
twist_2393	CAATTGGACCGCTATACCAA	700	twist_3773	CGAGCTCCATTCGCGCTGCA	20
twist_4044	CGGGCTCCATTCGCGATGCA	700	twist_674	CCTGTGCCACTCTTGTTGGA	20
twist_3182	CCGCGGCTCGACTCACTAAA	700	twist_2888	CCGCCGGAAATTACTAAAAG	20
twist_4014	CCTACAATTGCCCCTTGGCA	700	twist_1912	CTAAATGGTGGCATATTGCA	20
twist_2452	CAACCAATTTAAAAGATCCA	699	twist_1493	CGACCGGCTTACGTACTGAA	20
twist_2965	CAGTCACACACTCCGTTCCG	699	twist_2058	CCAATTACTAGTTTGAAGAA	20
twist_988	CCTCGCCAAACGCCTAAAAG	698	twist_1394	CCGCGGGTAGAGTAAACAAA	20
twist_1884	CATAGAGACTACAATTAAAA	698	twist_3834	CTATAACCCAGTCCGTTACG	20
twist_3376	CTGCCCTCTGCATTGAAACG	698	twist_1886	GCGCTTCACACTCCGACGAG	20
twist_2615	CGGGTCAATATTCCAACGGG	698	twist_61	ACGCCGCTTCTACCAAGACG	20
twist_1075	CAGGTAACTTTTTCTCCCGA	698	twist_3101	ACGATGAGAATGAATATGGG	20
twist_3521	CCTACAAATCGGGCGAGACG	697	twist_3113	CAGACTCGTTATAAGATAAG	20
twist_659	GCGGTTTGCAAATTGTGAGG	697	twist_1830	TTGCCCCTCGCCGTGTGACA	20
twist_2402	CATCTTAATTGAGTGACCGG	697	twist_3406	ACTAGTAGCGACCTATGCGG	20
twist_926	CATGTTTGCACGATGCAGGG	697	twist_40	CAGTGCACTTCCGTTCCCCA	20
twist_4131	CGAAGAAATTACGTGAGAAA	697	twist_2169	CAATTCCTTGTTCAAATCAA	20
twist_1093	CCACTACCACCGACATCACG	697	twist_1023	TAGGGAAGCCCTGTGCGAGA	20
twist_1858	CGGTAGCCCCCATCTTAGCA	697	twist_2819	CGAGCCTCACATAAGTCACG	20
twist_2323	CGAGCCTCCCATAAGTTACG	696	twist_2712	TTATAGAGTTTCCTTTGCCA	20
twist_3852	GCAGGCATAACTCCAAGAAG	696	twist_1378	GTGGTGTGTGGGACTCAGGG	20
twist_229	TAACAAGGAACGCTTCCGGG	696	twist_1079	CCACATTCCATTTCTCGAAG	20
twist_1875	CTAGGCCCCTGCATGAAAAA	695	twist_3516	TGGATAAACTCGGATTAAGA	20
twist_3350	GCGCATGACCGTCATTCGAG	695	twist_3455	CTAACCTAAGCACTGTGCAG	20
twist_3204	CCATTGCACCTCCCTCAGGG	695	twist_1473	CCTGTACCAGAGAAATGCGA	20
twist_3315	GCACCCATAGACAAGTCACA	695	twist_637	AAGCCCAATCCTCAACCGAG	20
twist_2569	AGGATGACAGATCTACTAAA	694	twist_806	GTTGCAATACCACTGTCCCG	20
twist_2900	CAGGAGAGCCGATTGCCCAA	694	twist_3998	ACTATACCTTTGCTGATGCA	20
twist_690	CCTACGAATCGGGCGAGACG	694	twist_2948	GCTCTGCGATAAATAATAAG	20
twist_2938	CCAAGAAACCGTGTGCCAAG	694	twist_2105	CCAGGCCCCCGGTATACACA	20
twist_1027	ATGGGGCTTGTCGCAACGGG	694	twist_258	CATGCGACCCCTGATACGCG	20
twist_262	CGAACGTCAGTCCCTATCCG	694	twist_1585	CAGCACGGTTTTCATCACAA	20
twist_2645	CTGAGGTAAGAAAATTAAAG	693	twist_2956	CCAGGTTGAAACGAGCTACA	20
twist_1076	CATTAGACCGGTATTAGCAA	693	twist_1214	AGATTTCCTGAGCCTCGAGA	20
twist_3314	CCGACGTATTGAACTCGCAA	693	twist_4057	CTAGGCCAAGTTACTAAAAA	20
twist_3969	CATACAAATAAATTATGAAA	693	twist_1387	CCACCAGGAAACAAGCCCAA	20
twist_731	TCGCACGTACAATTGCTCGA	693	twist_1185	TGTACGGCATGACATTGGGG	20
twist_4057	CTAGGCCAAGTTACTAAAAA	693	twist_436	TAGGTGGCTTACCCTCCCGA	20
twist_1724	CCTTACGGAACACCTCTCAG	693	twist_312	CATTTCACTGTCAAGCCACA	20
twist_431	CGAAAAGGACCTGAATCCAA	693	twist_1540	CTAGTAGGCTAGCCATCGAA	20
twist_2504	TAAAAGGGAAGGGCATCCGA	692	twist_553	TAGCGACTCAGATTTTGACG	20
twist_1672	CATTCCCGACGGACACGGAG	692	twist_3620	ACTTCTGGACATCCGAAACG	20
twist_743	CTAGTAGACCCCCCTCGCGA	692	twist_4188	CGAAGAAATCACGTGTGAAA	20
twist_651	CGAAACGACTGAATAAACGG	692	twist_2837	CATCAGTCATCGACTACCAG	20
twist_766	GATAACAACAGTGTTCGGAA	692	twist_859	CAAGGCTTCGGTCTGCAGGA	20
twist_2191	CAAGCCTCCCATAAGTCACG	692	twist_2251	CTGGCACAACTACATTAAAG	20
twist_954	TTGGGGGTCTCGGCATGACA	691	twist_2270	ACGCCGCTTCTACAAAGACG	20
twist_285	CCACTATGATTGAATATACA	691	twist_978	CATGATCTATAGATTACGCA	19
twist_3721	CAAACCTGCTCTGCGTACCA	691	twist_3016	TGATACAATTTAGCTACAGA	19
twist_1277	CGAGCCACCGCCTTATAACG	691	twist_3285	AATTACACACCACAATTAAA	19
twist_2090	GGATAACTAAAAGCACACAG	690	twist_280	AAGGATAAAGCAGTTAACAA	19
twist_2587	CATCTAAGAAACACGTTACA	690	twist_2860	CTGATGATTACCCAGAGGAA	19
twist_2028	CCACGAGTTCGACAAAAAGA	690	twist_399	GCAAAACTCGGTATGTCGCA	19
twist_1354	CGTATAAGTACTCTACGGGA	690	twist_1009	GCATGTTTACTAATAACGGA	19
twist_2078	CCAGGAAGTTAGTTGTCAAA	690	twist_3324	AGTATATTCTCGTCTAAGGA	19
twist_1593	CAAGAACCTCTCCTTAGAAG	689	twist_1643	CATAAATTACTGATTACAGG	19
twist_733	CATCATGTTACGGAGTACCG	689	twist_3747	CCTTACGCATAATCTTTCAA	19
twist_3900	GCGGGGTAAGTCCAGTTGAG	689	twist_3060	CGTTACAGAGCCTCTCCCAG	19
twist_2008	CAACAAAACCTTTCTTTAAA	689	twist_973	CGATTCAACACCGATATAAA	19
twist_3706	CCACGCGATCCAAATAAACA	689	twist_1224	CATGCTGATCTATCGCTGCA	19
twist_2021	CCAGATTAAAACGAGCTACA	689	twist_1465	CAAATCGGCCCGAAGACCCA	19
twist_3255	CCTATACACCTATAATCAGA	689	twist_2736	CCTCAGGTCGTTCTTCGCCA	19
twist_489	CCTGAGTGCTAATAAACACA	688	twist_2936	CTTGGTCACCGGTCGCTGAG	19
twist_3912	CGACTCCGAAAGACTTGAGA	688	twist_2896	CTTTACTCATTACCAAGCCA	19
twist_375	CTAGGAGATATAATGATAAA	688	twist_3829	CCGCACCGACACTAACACAA	19
twist_604	CGTCGCAAACAACAGAAGGG	688	twist_3835	CCTTCCCCACTTCCTCGACA	19
twist_313	CGTTAGCGACGATAACTCGG	688	twist_3102	GCACATGACCTTCATTCGAG	19
twist_50	GCACTTGGATTGCTAACAGG	688	twist_2902	GTAGCGTATGCTCCTATACG	19
twist_1860	CCAACATTAGACCTGACAAG	687	twist_1640	CATTCTACCCTTGCAAGAAA	19
twist_1336	GAGACGAGTACTATGACGGA	687	twist_999	CAACTATCTCACCTGACGAA	19
twist_845	CAGTCTTGTCATTCATAGAG	687	twist_3171	CAAGATATAAAAGTATTGAG	19
twist_459	CTGGACACTGTATCACCGGA	686	twist_2776	GCTAGCCCCTACCAACCGCA	19
twist_1969	CCTCCCTCAATCCCACCCAG	686	twist_3128	CCACTCCCCGTGTTTCACGG	19
twist_3792	CGTGCATTTGCATTGTTCCA	686	twist_2063	CCGTACTGTTAATTAAGAAA	19
twist_1324	CGAACACATGGATAGACGAA	686	twist_758	ACAGAAGCCTAGTATACCCA	19
twist_3176	CCTCGTGAAGAACCAATAAG	686	twist_109	CTGTAACTCGATGCAATACA	19
twist_364	CTTCAGTTTGACGAAATGAG	686	twist_2597	GAACCTAGCATTTATTTGAA	19
twist_2269	CGGCCTTGATAACAGAGGCG	686	twist_23	CAGGCACCAAAAACAAACCA	19
twist_20	CTGAGCAAACTCCAGTCCAG	686	twist_1693	CGAAGACTCCGACAATACAA	19
twist_1088	CCGTTACCAAGACTGTGAGG	685	twist_701	AATGTGCGAGATATAACCCA	19
twist_3125	CTAGATCGTTGTGTGCGAAA	685	twist_1671	CAAGCTGGCCAAATATCACG	19
twist_4103	CCGGTGCCCCGCATACACAG	685	twist_2954	CGTTTCTATGATCAATCACG	19
twist_239	CATTTGCGCGCAGAGATAAA	685	twist_3426	TCTAGGGCCATACCTATAAA	19
twist_1863	CGGACTGATACTGCGCCCGG	684	twist_2191	CAAGCCTCCCATAAGTCACG	19
twist_1765	CCAATTTACAACACGCCGGG	684	twist_2038	CAGACCTACATTCTGTCGCG	19
twist_25	GCGCGCTCCCAATAGCAACA	684	twist_3952	AGTGTCGCACCACAACCCAG	19
twist_1248	ACATCAGATATCAATTAAAA	684	twist_4070	AAGCAGCTCAAAACGCTCAG	19
twist_2384	CTGAGCAAACTCCAGTTCAG	684	twist_2486	ACTACACTTTATCCGACCAG	19
twist_3615	CCTCCAAGTAATACGTAGAG	684	twist_3555	GTTTGGTAAGTTTATCAACG	19
twist_3692	CTATGTGAATAACCGCGCGA	683	twist_1403	CTGTTAATACGAGATCAACA	19
twist_734	CGTGCGCCCTGAGATTCAGA	683	twist_2540	CTAGTTTGTTGTGTGCGAAA	19
twist_2400	CAAACTCTCCCGGTATAACG	683	twist_2324	CGGGGCCCCCACCATTTAAA	19
twist_850	AGGGCCAGCTACTATATCCG	683	twist_1985	CGGTAAAGCCCCGTAACCCG	19
twist_2926	CATCCTCGTATCCTGAGAGA	682	twist_1618	CATTTCGGATCCCAAACCGG	19
twist_3446	CGGGTCCATATTCCATCGGG	682	twist_1005	TCAACGGGAAGAGATCTAAG	19
twist_124	CCAGGCCCCCGGTATACACG	682	twist_463	GCTCTGCGATAATTAATAAG	19
twist_4106	CCAATCGGAAGATAGATCCA	682	twist_2840	TGGGGCCATCTATTGCCGAG	19
twist_47	CGGGCTCCAGCTGCAAGACG	681	twist_3471	ACAGGACATTGGAAAAGAGG	19
twist_739	TCGGTCTTACAGTTAATAGG	681	twist_2536	ACTAGTAGAGACCTTTGCGG	19
twist_4084	CAATGGCTTACCACGTTAGG	681	twist_1286	CATTATCACCTAATGTTCAG	18
twist_847	CGATCTAACTGGCTACACGG	680	twist_3540	CCTGTTGTCATTATTCACCA	18
twist_2491	CAGTGCACTTCCGTTTCCCA	680	twist_1525	CGTATTATCTATCCGACCAA	18
twist_2025	CCTACAATTGCTACTTGGCA	680	twist_1459	TAGAACAGAGCATAGTAACA	18
twist_41	TAAAGACTATGACCACCCAG	680	twist_2559	CCTAATCACTACTTTTCGAG	18
twist_1268	GTACCGGACAATCAAAACCA	679	twist_2163	CAGATAGCCCCTTTGACAGG	18
twist_523	CAGTGTCGTTGCTTTTTGAG	679	twist_642	AGGTTAATAGGATTGATGAG	18
twist_758	ACAGAAGCCTAGTATACCCA	679	twist_1655	CCGGCGATAGCATATCCAAA	18
twist_2594	CTTAACCAATAGCAGAAGAA	679	twist_2029	TCGATCGGCCACGCTCCCAG	18
twist_4165	CCAAAGGTCACAACTTTCGG	679	twist_420	GTAACGATTTCCACTTGCCA	18
twist_107	CCTGACCTCCTCACATCCGG	678	twist_2875	AGTATATTCTTGTCTACGGA	18
twist_3100	TAACAAGGACCGCTTCCGGG	678	twist_1141	CAACCGGGAGGAACTCGCCA	18
twist_1273	TAGGAGGCTGGTCCACAAAA	678	twist_1106	GTAAAACGAGGGCTTCCAAG	18
twist_4163	CTGGTAGAACACCCAACCCG	678	twist_353	CGGGGCCCCCACCATTCAAA	18
twist_1364	CATATCAATGTATATCAAAA	678	twist_1121	CAATACGGATACACTTAACA	18
twist_2037	CTACCCACCCCATATCGCGA	678	twist_1264	CTTTTTTTTCTGACAACCAG	18
twist_682	AGTGTCGCACCACTACCCAG	677	twist_1205	CATGCAAGTGACCAGACGGG	18
twist_1961	ATGAGGAACCGGATTCGAGG	677	twist_383	AGGAGGTTCTATGATCACCA	18
twist_4029	CCTGAGTGATAATAAACACA	677	twist_1462	CAATTCCTTTGCGATACAAA	18
twist_2676	CAGATATCCAGTTAACACCG	677	twist_3382	AAAGGGATCGTGCTGCACAA	18
twist_1212	CGGGAATACTCTATAAAACA	676	twist_1495	CAAGCCCCTTATGAGCAGAA	18
twist_932	CTGCCGTGTTCCATACTCGG	676	twist_3110	CCAATCGGAAGATAAATACA	18
twist_2386	CATCTTGATTGAGTGCCCGG	676	twist_3158	GCAACTTGTTGTGCGCCCAG	18
twist_2461	CCATCCCACCAAGATAAAAG	676	twist_2541	TCGGTTGTAGTGATTTTAAA	18
twist_363	CTGACCTAAGCACTGTGCAG	676	twist_2517	ATAGGGCATAATTTACACGG	18
twist_3537	CAGCGGTCTCCCCAACTGGA	676	twist_1734	CCATCCGGATTCCTATAGGA	18
twist_1416	ATGAACCGCTTGGAAACGAG	675	twist_3131	AGGGGTGGCCAGTTATGCAG	18
twist_3984	AGGGATGTTGCGGCATTACA	675	twist_825	CATTAAAGAGCCCTATCACG	18
twist_2149	CCTCAGGTCGTTCTTTACCA	675	twist_375	CTAGGAGATATAATGATAAA	18
twist_4111	CGGTTCGGCGCCCCAATCAA	675	twist_810	CTACTACTTGTACCATGACA	18
twist_4203	CCAAAGAGAATCATACAGAA	674	twist_1143	GCTTTAGACAAAGTTCTGAA	18
twist_1311	ACATAGAACGATCTTCTCAA	674	twist_2395	CAAACCTGCTATGCGTGCCA	18
twist_1452	CCGGCGTATATAGATTACCA	673	twist_659	GCGGTTTGCAAATTGTGAGG	18
twist_1931	CCAGAATCTCGAAAGCAGAA	673	twist_116	AATGTCTAACCTAAGTTGCA	18
twist_3916	CGACTAGGACAAGTAAACGA	673	twist_3062	CATCTTGATTGAGTGTCCGG	18
twist_3892	CTGAGGAGTTGCTTGAGACA	673	twist_3111	GAGCCGCGATTCGCTCCAAA	18
CYSLTR2_2132	GAAACGCACAACACTCAGCA	673	twist_3463	CCTTGAGCATTTATGAACGA	18
twist_3157	CATCTAAGAACCGCGTTACA	673	twist_880	GAATGCAAAGCTACGACGAG	18
twist_2989	AAGGATAAAGCAGTAAACAA	673	twist_2679	TGGGGCCCTATATTGCCGAG	18
twist_2175	TAACGCACTAACTTACACCA	673	twist_4009	CAATTGGGAGTTCCTAACAA	18
twist_812	CTGATTACATGCGAACTCAA	672	twist_3860	CAAAAAGACACACTGCGCAG	18
twist_99	CCGCGGCTCAACTCACTAAA	672	twist_73	AGAAACCATTTAATTCCCCA	18
twist_1368	CCGACTTCATAGGCTCAAAG	671	twist_36	CTTGGGCCACGTTTGTTCGA	18
twist_2382	CATCTAAAAACCACGTTACA	671	twist_4035	CTAGCCTTAGCCTAGCCGAA	18
twist_2468	ATAAACCGCTTGGAAACGAG	671	twist_3509	TCGGCCATTATCGCGAGACA	18
twist_3561	ACTGCAAATCTTCAGCCAGG	671	twist_1098	CGTCGACCTAGCCATACAAA	18
twist_1155	CCGTAGACCTGACTACTACG	671	twist_1461	CAAGTATCAACATCGTGAAG	18
twist_851	AGTGCCGCAAGCCTTACGAG	671	twist_215	CAAGTGAAAGAACATTTCGA	18
twist_3282	CCGACGTTTAGAACTCGCAA	670	twist_3515	AGAAGCCATTTAATTCCCCA	18
twist_1595	CTACCTAAAAAGATTAAAAA	670	twist_3182	CCGCGGCTCGACTCACTAAA	18
twist_92	CGATGCTAAGCCCTGTGAGA	670	twist_2451	CTGATAGAACACACAACCCG	18
twist_1632	CATAGGCACGCTCCTATAGG	670	twist_4072	AATAAATATGTCACAACAGA	18
twist_1019	CTTCACGATACTCTGTCAGA	670	twist_3349	CGGGCTCCAGCTGCTAGACG	18
twist_2962	GCTAAGGATTTCCAATAAAG	670	twist_1026	CCACATTGTGACTTTTAGCA	18
twist_4088	CAACTGCTTTGTACAATCAA	670	twist_4014	CCTACAATTGCCCCTTGGCA	18
twist_2852	CAATTACCTATTGCACTGGG	669	twist_3816	CCTATGCCACTCTTGTTGGA	18
twist_3478	CCGACCCTTTTTTCAAGGGA	669	twist_3093	AATCAAAACTAGGCGACACA	18
twist_390	CAGTGATAAGCACCATTGCG	669	twist_543	ATAAGCACTTCACAAATACG	18
twist_614	CATGAGAGTAGAATTCTGAA	669	twist_4123	CAAGGGTGACCGCATAGGGA	18
twist_3802	CGAGTTACACAACCACAGGA	669	twist_2406	CCAGATTGAAAAGAGCTACA	18
twist_1725	CATAGGCGTGAATTACTCCA	669	twist_3930	CTACATACACAACTTTCCAG	18
twist_3975	CATCCTCGTATCATGTGAGA	669	twist_1103	CAACCATATCCGGTGCAGAA	18
twist_3725	TAGGGAAGCGCTGTGCGAGA	669	twist_2184	TGGGGCCCTCTATTGCCAAG	18
twist_3670	CTGGAGAGCCGTTTGCCCAA	668	twist_50	GCACTTGGATTGCTAACAGG	18
twist_2344	CATCTTGATTGAGTGACAGG	668	twist_4183	CGGCCTCGATAGCAGAGGCG	18
twist_4172	CCTGCCGTCATTATTCTCCA	668	twist_1487	CGGCAGTCCATTTCTTTAGG	18
twist_495	CTTCGGTGCTACAAGTGAAG	668	twist_432	GATCGACAATCTCAGTCAGG	18
twist_2696	ACTACACTATATCCGACCAG	668	twist_3648	CGGAGTGTAATCTATTCCAG	17
twist_1786	CCGCTTTCACTAGTTCACAG	668	twist_1169	ACTCTAATACTCGAGAGGCA	17
twist_4069	AATCCGGGCATAGCAAGAGG	668	twist_4136	GTAACGATTTCCACTTTCCA	17
twist_2850	ACGCTTAGAGATTAAAGCCA	667	twist_3669	CGAACTACATCCTTACCGAG	17
twist_2631	CCGAAGGCAGTGAAGCTCAG	667	twist_2836	CCGGCACCCATACATCAAGG	17
twist_4121	CAATGGTTCATTGATTGCAG	667	twist_1573	CGAACGTGATTTTTTCCCAG	17
twist_819	GCTACAATAGCTGCTCAGAA	667	twist_3308	ACTTCTGTACATCTGAAACG	17
twist_3517	CATGTTTATTCTGTACACGA	667	twist_3736	TGATTTACTTACTTTTGGGG	17
twist_698	CAGTGACCAACCATTCGCCA	667	twist_3748	TCTATTCCTTACCAGTAAAG	17
twist_965	CGAAGAAATCACGTGAGAAA	666	twist_1245	CTTGATAGCACGTTTCGAAA	17
twist_825	CATTAAAGAGCCCTATCACG	666	twist_1716	GGGCTATGCAGACTAACCGA	17
twist_3574	CTACCAATTTGAAAGATCCA	666	twist_2786	AATGTCTAACCTAAGATGCA	17
twist_2221	ACACAGTCATGCTCTTAGGA	665	twist_569	CGAAACACATTCATGTAACG	17
twist_2652	CCTGCCAACACTATACGCCG	665	twist_4062	ATGTCCAGAGGATTAAGGAG	17
twist_2687	CCATTGCACCTCACTCCGGG	665	twist_668	CAAAGGGACCAGCAACGAAA	17
twist_3806	GCGGTTTGAAAATTGTGAGG	665	twist_3395	ACTATCAGATTACAGATCCG	17
twist_3534	ACTGCATTTGCCCTTCACGG	665	twist_1151	ACTTGCGAAGTACATTACCG	17
twist_2406	CCAGATTGAAAAGAGCTACA	665	twist_2017	CGATGTCCACAATAGCAACA	17
twist_29	CAACTTACCAGGTAAAAAGA	665	twist_2215	AGACTACCCTGAAATTTACA	17
twist_3278	ACGGCCCTTATCGCGAGACA	664	twist_1180	AGTCCCACATTTACGCCAGA	17
twist_973	CGATTCAACACCGATATAAA	664	twist_2675	CAAATACCTGGCCAGCAGCA	17
twist_1701	GCGTGCTTCGGGACATACGG	664	twist_2518	GCTAGCACCTACCAAACGCA	17
twist_3105	CTGCCAGCCCGGTCTCCCCA	664	twist_597	CTAAGAAACGAACCATACAA	17
twist_2904	CTGAAATTACCATAACACGG	664	twist_627	TAGCCCTCCTCGCAGTAAGA	17
twist_4085	CAGTCCCAAACTCCGTTCCG	664	twist_3143	ACGTCCACTTCTCAGTTAAG	17
twist_929	CTAATGATACGCGAGCAAAG	664	twist_3295	TCTGAATCTTTGGTTCACCG	17
twist_2724	CAGATATACAGTTCACACCG	664	twist_2019	CATGTATGCTTGAAGTCCGA	17
twist_2152	CAATCGGGCCTAGTAAGCAA	663	twist_3957	CAATTGACCCACTAGCAGGA	17
twist_2437	CTTGGGACACGTTTGTTCGA	663	twist_2424	CTGAGCAAACTCAAGTCCAG	17
twist_3262	CTTGATAGCACGTTTCAAAA	663	twist_1612	CAATCGTGTCAAACGTTCCA	17
twist_1139	CCTCAAGATCTCTTGATCAA	662	twist_2285	CAGCACACTTAAAAGAGCGA	17
twist_2754	CGATACAATTTAGCTAAAGA	662	twist_4002	CAGACCTTAAAAATACAGAG	17
twist_1700	CGGACCATTTTTCCGTACCA	662	twist_4007	TCTCACAATACTAATATAGA	17
twist_1257	CCTATCGCATGCTAGATGAG	662	twist_728	CTGTTTTGATATAATCCGAG	17
twist_2835	CTGTAATGTTTATTACGACA	662	twist_1581	AGAAAGCCCGGGTAAAGACG	17
twist_3403	CGATACAGTTTAGCTACAGA	662	twist_4117	TGAACAATTTGACAAATCAA	17
twist_1144	CATACTAGAGTAGATCCGCG	661	twist_1089	CCGCACAGATTACTGTCAGA	17
twist_2120	CTAGCCTAAGCCGCATGCCA	661	twist_2476	ACGCTTAAAGATTAATGCCA	17
twist_4065	CGAAAAGGACCTCAATCCAA	661	twist_4124	CGGGGCCCCCACCAATCAAA	17
twist_4067	CCAAGACTCTTCTAAAACAG	661	twist_1308	CCAAATACTACTTCACTAAG	17
twist_713	ACAGGACATGGGAAAAGAGG	661	twist_1759	CATGAGGGCCTGGCTCTGAG	17
twist_1182	CAGTAACCCCCGACATGAGG	661	twist_1628	ATATCTGCAGATTCGACCGA	17
twist_1351	CAGGCCTTCAAGGATTGGAA	661	twist_3241	CGTTACCGAGCCTCTTCCAG	17
twist_1751	CGTACATTAATAAAACCCAG	660	twist_4191	TAGGATTGCAAGGCTTCCCA	17
twist_1283	CCGAAATAAAATGAATCAAA	660	twist_210	GCTTGTCCATGAGTGATGAA	17
twist_4210	CGGATCAGCTGACTAAGGAG	660	twist_1991	CATACCCTAATACATCGCCG	17
twist_3210	CATATAAATAAATTATAAAA	660	twist_145	GGTGACATCTCCACTAACGG	17
twist_567	CCTTGGACTCGATTAAGAAA	659	twist_1903	CAGCTCTATTACCTTTTGGA	17
twist_1173	CGGAAGTGCCAAATTCCAAG	659	twist_3268	CAACCCTGCTCTGCGTGCCA	16
twist_3805	CAAGAGCCAGAAATGCTAGA	659	twist_222	CCTACCAGTGCACAGACAAA	16
twist_3522	CCTTTAGTTCTAACAATGAA	659	twist_2337	GCACTTGTAAAGGCGTTAAA	16
twist_3868	GCACATGACCGACATTCGAG	659	twist_3681	CATACCAGTGCACAGACAAA	16
twist_1189	TCGCCGGCTTGTGCGCGGGG	659	twist_2087	CTTGGTCAACGCCTTCAGAA	16
twist_2674	CAAATTACCAGGTAAAAAGA	659	twist_1863	CGGACTGATACTGCGCCCGG	16
twist_919	CGGTCCAGAAGGCCACCCAG	659	twist_1288	CGATCCACTACGGCTAACAA	16
twist_643	GCTAGTAGTGACTAACCCAG	659	twist_2243	CCTTAGGTCGTTCTTCACCA	16
twist_3584	CTTAAAACATGTGCTACGAG	658	twist_68	ACAAGGCAAATTTAAACAAA	16
twist_871	CTACGGCGAATTAAACTCAA	658	twist_3041	GCGTTGCAAGTTAATTTACG	16
twist_2556	ACTAGAGACTGTGTTCGAAA	658	twist_547	TTGTGGGTCGGTAAAAGGCA	16
twist_3764	TAGGGAATCCCTGTGCGAGA	658	twist_1139	CCTCAAGATCTCTTGATCAA	16
twist_97	CCTCAGGTCGTTCTTCACCA	658	twist_2304	CTATCTTGCTTCCCTTCCAA	16
twist_1442	CAATGGAATTGATAGCAAAG	658	twist_1636	CCGAACAGTTTCCATTCGGA	16
twist_3547	CAGTTCCAAATAGAATAACA	658	twist_1779	TAGACCCACTTTCTTCCCAG	16
twist_595	CTTCAGGTTTGTCAACACAG	658	twist_172	AAGCGGGGTTGATAAAACAG	16
twist_2655	CGATGACAAAAAGATCTCCG	658	twist_107	CCTGACCTCCTCACATCCGG	16
twist_1603	CAGACTCGTCATAAGATAAG	658	twist_1517	CCAGCCTGATATACTCCGAA	16
twist_3719	CTTGGTAAAAAACAGTCAAG	658	twist_3781	CTTTCACTCAATGAATTCAG	16
twist_518	CTAGTCGATCCGCTTCGGGG	658	twist_250	TATTGACCACATGAACCCGG	16
twist_2549	CGGTGAAATCCCATTTAGAG	658	twist_3343	CTAGCCTTATCCTAGCCGAA	16
twist_2303	CGATACAATTTAGATACAGA	657	twist_3366	CTGTACCTTGACAATATGCA	16
twist_3560	CTATTGGACCGCTATACCGA	657	twist_140	CTGCCCCGTACGGCTATCAG	16
twist_1459	TAGAACAGAGCATAGTAACA	657	twist_1356	CCGTCCCGAACCCTGATACA	16
twist_3069	CCAGATTGAAATGAGCTACA	657	twist_2769	TAAAGACTATGTCCACCCAG	16
twist_112	CCACTCCCCGTGTTTTACGG	657	twist_504	CTAAGACACTAAGTGACACA	16
twist_2372	CAAGGTATTAAGGCTAAAAG	657	twist_4144	TAGAGCTCTCTCTCGCTAAG	16
twist_3311	CAACCAATATGAAAGATCCA	657	twist_1211	CAAATCACACACAATACAGA	16
twist_2419	CTGGCACCACTAAATTAAAG	656	twist_2774	CATGTTTATACTGTACGCGA	16
twist_1437	CCTCGTAGATGTTCGTTCCG	656	twist_2914	TCGCCTCACAACCATTCGCA	16
twist_881	CATACTCGTTGAACGTTGAG	656	twist_2326	CTATCTTGCTACCCTTCCAA	16
twist_930	CCTAAGGCCCGCAAACTACA	656	twist_3920	CCTAATCACTCCTTTTCCAG	16
twist_2716	CGGCCTCGATGACAGAGGCG	656	twist_660	AAACACTCACCTGAAATGCA	16
twist_2988	CTGCGGTCTCCCAAACTGGA	656	twist_3956	CGTCTAACCCCGGCTAAACA	16
twist_1956	AGACGCGTTTCTCTGAGAAG	655	twist_3147	ACTTACTTAACTTATTGCCA	16
twist_1975	CTAACCCACAAGGCACTAGA	655	twist_1404	ACTTGGGACGATGTAAGACA	16
twist_2602	AGGAACAGTAAGGAAACGAA	655	twist_3968	CTGAGGAGTTGCTAGAGACA	16
twist_1998	TGGAGCCGCTTTATTCAACG	655	twist_2715	TGGGGCACTCTATTGCCGAG	16
twist_2719	CTAAGGTAAGAAAATCAAAG	654	twist_617	GTTTACACCTGCGCTAACAG	16
twist_13	GAGGCTACTGATCTACCAAA	654	twist_1166	CTTTGGATCAACGAACTGAA	16
twist_3925	CGTGACAGTAGCATACTAAA	654	twist_3975	CATCCTCGTATCATGTGAGA	16
twist_2677	CTAATGTATTTGAAGCCCAG	654	twist_3462	CGGGGGATATAACCGTGACA	16
twist_1698	CGACTCCTACGTCCACTAAG	654	twist_590	GCTGCAGCCTAGCAAATCAA	16
twist_746	ATGGACCATCACCAATAAAA	653	twist_2797	CCTAAGTGCTAATAAACACA	16
twist_2250	CCTGCTCCTGGTTATATGGG	653	twist_718	CTGTTCGGTCCCGTGTGACA	16
UGCG_2088	CATCATGATCTTGTACACAA	653	twist_1160	TAAAATCTTCATTCTATACG	16
twist_3202	GCGGCCCTACGTGTTCCAAG	653	twist_566	CGGGGGATATCACCGTGACA	16
twist_4213	CATCTAAGAACCACATTACA	653	twist_761	CATTACTGCCACCCTCAGAG	16
twist_2127	ACTACTAAAAGTACGAGCAA	652	twist_214	CTGTTATATATTCAACCCGA	16
twist_3334	CTGAGCAAACTCCAATCCAG	652	twist_2822	CATGTTAATACTGTACACGA	16
twist_770	CAGTCTAAAAGCCTAATAAA	652	twist_915	CGTAGCCACCACGATATACG	16
twist_1157	CGACGTACCACACAACCACA	652	twist_3788	CTAGCCACAGTCTAAAGACA	16
twist_17	CTTCAGGGTAATCCATTACG	652	twist_729	CCTCAATAACAATTAAAAAG	16
twist_951	ATGAACTCCTACGATAGCAA	652	twist_2707	CGGCCTTGCACCTCACAAGA	16
twist_1612	CAATCGTGTCAAACGTTCCA	652	twist_131	CGGCGGCGAGACCATTCGAA	16
twist_2727	CCAACAACAGTCCATTTGAA	652	twist_2544	ACTCGAGACTGTGTTAGAAA	16
twist_969	ACGCCTCAAAGTACTAAAAA	651	twist_979	CCTGATACAATATCTATAAA	16
twist_3470	CCTCGCCGACACTAACACAA	651	twist_4137	ATTCATGATAACACTTTGGG	16
twist_3303	AAGGTAATTTAGATACTCGG	651	twist_1925	GATAGGTCTATCAAGTCGAG	16
twist_1388	ACGGGGGTTGCCGATCTACA	651	twist_3097	CCACGTGAAGAACCAATACG	16
twist_1596	CTAGCCACAGTCTAGAGACA	651	twist_2998	CAAATATGCACAACTATACA	16
twist_681	CCGGTGCCTTACCCATCCAA	651	twist_2976	ACTCGGGACTGTGTTCGAAA	16
twist_735	CAACATCCCGCCTTGTCGCG	651	twist_1142	TGAACAATTTGACAAATCCA	16
twist_233	CCGGGTCCTAGAGTAAGCAA	651	twist_2924	CGTACTAATCTTACAAGGGA	16
twist_1104	CGGTCGGGCCCCTAGATAGA	650	twist_2841	AGTAAAAACCTACCACACCA	16
twist_3401	GGTAGTGCTGATTCACGGGA	650	twist_3649	CATATTCCACCTGCAATCCA	15
twist_2990	ACTCGAGACTGTGTACGAAA	650	twist_1868	CATCTTGCATACCTGAAACA	15
twist_3179	AGACATAAAACCAATTCCGA	650	twist_2376	GCACACATAGGCAAGTCACA	15
twist_1840	GGAGGTTGAGCCTCGAGAAA	650	twist_512	ACTATACCTTTGCTGACGCA	15
twist_2434	CCAGATTGAAACAAGCTACA	650	twist_1860	CCAACATTAGACCTGACAAG	15
twist_2963	CCTACAATTGATCCTTGGCA	650	twist_3698	CTAACTTGCTCCCCTTCCAA	15
twist_1638	CAGAATCATGATCCAACCCA	650	twist_3115	ACAGGGTGTTTGAAATCCAA	15
twist_1548	CTACAGACTTGGGTGCGAAA	650	twist_1040	AAGTGCACCATGGTATACAG	15
twist_2438	CTGGAACCACTACATTAAAG	650	twist_2749	CTGTGTGCTAGGGCTTTAAA	15
twist_4098	CCGAGAGCTCTCACTAGCCG	649	twist_13	GAGGCTACTGATCTACCAAA	15
twist_1362	CCAGTAAGTTCAATACCGCA	649	twist_3969	CATACAAATAAATTATGAAA	15
twist_36	CTTGGGCCACGTTTGTTCGA	649	twist_2108	TCTGTTGTTTACTTACAGGG	15
CACNA1C_4033	GATGGGGCAAACGCTCTCGG	649	twist_3072	GAGCCGCAATTCGCTCCGAA	15
twist_3877	CGATGGGCCCGGTTTTGGGG	648	twist_2170	CTTCATAAACTTAAATCACA	15
twist_3172	CAATGGCCTATTGCACTGGG	648	twist_169	CCGGGTTGTACGAAGCCCCG	15
twist_51	CGATGACAAAACGATCTCCG	647	twist_3770	CCTACCTGTGCACAGACAAA	15
twist_3064	CTTGGGCCACGGTTGTTCGA	647	twist_3279	CCAGATCGAAACGAGCTACA	15
twist_4090	CCTCAAAAATACTAACCACG	647	twist_3601	TTAACCTGTGTGTAGCAGAG	15
twist_1923	CTACGTTACGCACCGAACAA	646	twist_3365	CTGGCTCCTATACTAATAGA	15
twist_3313	CCTGCTGTCATTATTCACCA	646	twist_3823	CATTGCCTAGTATTGCGACA	15
twist_2763	CTGCATGCCCGGTCTCCCCA	646	twist_1437	CCTCGTAGATGTTCGTTCCG	15
twist_2668	AAGAATAGCCTATAGAGAAG	646	twist_3108	AATTGTCCTGCTCTATTAGA	15
twist_314	CCAACCCATCGATATATCCA	646	twist_1201	CCACACATTCCCGAGTCCAA	15
twist_2397	CGACTCCGCAAGACTTAAGA	646	twist_1268	GTACCGGACAATCAAAACCA	15
twist_2532	CCAAGAACTCTCACTAGCCG	646	twist_3872	GGGGGTCGCTTCACTCTACA	15
twist_1461	CAAGTATCAACATCGTGAAG	646	twist_3397	CTTATTTACCACACTCAAAA	15
twist_1723	CATAGCCCTCGACCTTCACA	646	twist_1610	ACTCGCGTAAACATAAACAG	15
twist_3076	GCACTCGTAACGGCGTTAAA	645	twist_9	GGGTTCTACCACTTGACAAA	15
twist_504	CTAAGACACTAAGTGACACA	645	twist_3129	CCTCATAAATACAAACCACG	15
twist_2204	CATAATATAAAAGTATTGAG	645	twist_97	CCTCAGGTCGTTCTTCACCA	15
twist_4027	CAATCTCGTAAGTAACCCCA	645	twist_861	CTGTCCAGAGGATTAAGGAG	15
twist_118	CCGGCACCCATTCATCAAGG	645	twist_3428	ACTTTACCTAAATTGATGCA	15
twist_581	CGGAGTGTAATTTATTCCAG	645	twist_154	ATTGGTACTCCGGTATCACG	15
twist_3267	CGAGCTCACACAAAACCCGG	645	twist_928	CGACCGATTGTCATAACAGG	15
twist_2041	CTAGAAAGTGAGACGTACAG	645	twist_1586	GATGCAACACGTAATTCGGG	15
twist_3020	AAACAGGTACCCTAGAAGAA	644	twist_1065	GTACTCATATTTCCTCAGGG	15
twist_983	CGAGCCTCTGTCGAAAAAGG	644	twist_1947	CAGGAGGGATACGCACTGAA	15
twist_3525	CAAGAAACCATCACACCAAA	644	twist_3297	CTTATGTCCCTACAATTGGA	15
twist_1029	ACACAGTAACCCCCTAAGAA	644	twist_1184	GTACAACACCCGTTTCAAAG	15
twist_3152	CCTCAAAACCGCAATTAAGA	644	twist_1454	CCAATCAGTGCAACGTACGG	15
twist_3220	CCAGGCCCCCGGTATTCACG	644	twist_3630	AATCCGGCCATAGCAAGGGG	15
twist_3796	AGAAACGACTGAATAAACGG	644	twist_2400	CAAACTCTCCCGGTATAACG	15
twist_1195	CGGAGATACCACCTGTAACG	643	twist_2428	CTGGCACTACCACAATTAGA	15
twist_2283	CAATAACCTATTGCACTGGG	643	twist_1176	TCAGGGAAAAAGTTGTTAAA	15
twist_3128	CCACTCCCCGTGTTTCACGG	643	twist_1034	GAGCGACAACGGGATCCACG	15
twist_2291	AAACATAAAACCAATTCCAA	642	twist_309	CTTCCGCCCTCGGCTTGGCA	15
twist_1687	AATCAAGCCGGACCGAACCA	642	twist_2703	CGGTCTCCAGCTGCAAGACG	15
twist_241	CTGACAGCCCGCAAATAAAG	642	twist_1051	AGTCTGGTACCAATATCCAA	15
twist_2014	CTACCCAGCATAATTACCAA	642	twist_4065	CGAAAAGGACCTCAATCCAA	15
twist_3258	CAACCAATTTGAAAGTTCCA	642	twist_1782	CAGGTACCCCCAACGAACAA	15
twist_910	CAGAAACATCACTAGAAGAG	642	twist_708	CGTGGAATCCTTAAACCGAA	15
twist_738	CTACCAATTTGTTTACCGCA	641	twist_2714	CGAGCCTCCCATAAGTCAAG	15
twist_1936	ACGCATCATCTGCCATGCGA	641	twist_1699	GGAGACATAACGCAGTTAAA	15
twist_3745	CGTTAAAGTGTAACGCTACG	641	twist_2972	CCAAACACTTGACATTCACG	15
twist_3390	CTTCAGTAACAACTATAACG	640	twist_1520	GTTCTACCCTCAATGAGAAA	15
twist_1298	CCAGGAGGTCGGAAGCTCAA	640	twist_3564	GGATGGTAACCTGAATTAAA	15
twist_1337	CGGAAATTTTGGCAGTGCCG	640	twist_2	CCTGCTCCTGGTCATATGGG	15
twist_2693	CTGCATCCCCTTTAACCAAA	639	twist_351	ATGGTCCTTATTCATACAAG	15
twist_816	TAGGCCAAATGGGAGTAGGA	639	twist_1776	CCTAGAGAATCAACTTTGAG	15
twist_3616	CGAAGTGACCGGTCTAAAGG	639	twist_1191	TAGTTCGCCCTTCCGTCGAA	15
twist_974	GGGGATCAACTATTATCACA	638	twist_919	CGGTCCAGAAGGCCACCCAG	15
twist_3965	ACTAGAAGTAACCCGCAGAA	638	twist_1071	CCTCTTCCTAAAGCGCACAG	15
twist_1992	CTAGGCCAAGTCACTAAAAA	638	twist_1411	CCGGAAAATAAGAATTAGAG	15
twist_2165	CTAAGCAAACTCCAGTCCAG	638	twist_927	CCGTTCACTGTGTATCAGAA	15
twist_1993	CCTGCTACCCCCACATCACG	638	twist_955	CTTTCGACCATCCTTACAGG	15
twist_887	CCAATAAACTTCTCGAAAGA	638	twist_3616	CGAAGTGACCGGTCTAAAGG	15
twist_1495	CAAGCCCCTTATGAGCAGAA	637	twist_3632	GGTTCATCCTATTAAACGGA	15
twist_4175	CGGTGGCCTCCGACTTGAAG	637	twist_1100	TAGCAACTCCCGCTGAAAAA	15
twist_2484	CATATAAGAACCACGTTACA	637	twist_278	CCAGCCCGAATATCGCCCCA	15
twist_752	GAACTCAAACTGTAACGGGG	636	twist_2553	CGATGCTAAGCCATGTGAGA	15
twist_2319	GCACTTGTAACGGCGTTAAG	636	twist_187	TGATCCCCTCCCGATAGACA	15
twist_320	CGATAATGACCTCCACAGAG	636	twist_1959	ACTGATAGATTAAAGTGCAG	15
twist_3092	ACACTTGTAACGGCGTTAAA	636	twist_802	ACGTTGCAAAAGAAACACAA	14
twist_31	CGTGACAGCAGCATACTAAA	636	twist_3655	GAAGAGGACCTATCAACAGG	14
twist_3173	CGATGCAAACCACTACTACG	636	twist_2411	TAACGCACTAACTAACACCA	14
twist_1702	CCTCTGTACGCCTTATAACG	636	twist_568	TATATTGATACCATATAGAG	14
twist_695	CCTGTTGCCGTCGCGTTACG	636	twist_2379	GGTAGTGCCAATTCACGGGA	14
twist_616	CCTTCACGACCTTAACTACA	635	twist_3020	AAACAGGTACCCTAGAAGAA	14
twist_3657	CGATGACAAAACGATTTCCG	635	twist_3025	CATCCGATCTTAAAATTCAG	14
twist_2933	CCGACCCTTTTTCAAAGGGA	635	twist_2497	CAGGGTTGTACGAAGCCCCG	14
twist_2659	CATTTAAGAACCACGTTACA	635	twist_2418	CTATCTTGCTCCACTTCCAA	14
twist_4154	CGTGACATCTCCACTAACGG	635	twist_1416	ATGAACCGCTTGGAAACGAG	14
twist_368	CCGACCCTTTTTCCAAGGGA	635	twist_3608	ACTCGATTTGATGTTTCACA	14
twist_2245	CAATGTCCACCATAGCAACA	635	twist_4089	CTGTGCTGCGCAAATAAGCA	14
twist_3423	CTAAGGAGTTGCTCGAGACA	635	twist_1819	CTGTGCCATCGTTAGTGCAA	14
twist_2525	CCTGCCGTCATTATTAACCA	635	twist_2653	TCTAAGTTACCCGCTTCGGA	14
twist_2968	CTATATGAATAACCGCGAGA	635	twist_1565	CAGTACCCCGCAATACCGAG	14
twist_1994	CGACTTTGCAACGCATCAAA	635	twist_3054	AGGTTCCCATTTAATAAGAA	14
twist_674	CCTGTGCCACTCTTGTTGGA	634	twist_2809	ATTTTGGCAGCGGTACTAGG	14
twist_1004	CTAGGGTGAGACGCTCTCCA	634	twist_2616	CTAATCAGCTTCGCGTCCAA	14
twist_2240	CTGGAAGACCATTCAAGCGA	634	twist_3347	ACGCCGCGTCTACCAAGACG	14
twist_561	CTATGCATATGCGATCCGAA	634	twist_3081	CGTTAGATCTTGGCGCCGGG	14
twist_3666	CGGTCTTATTGCGTATACAA	633	twist_247	CTAATACTTAGGAAGCCGAG	14
twist_1819	CTGTGCCATCGTTAGTGCAA	633	twist_1846	CAACGGAATGAAATAATACG	14
twist_2453	CTAATAGAACACCCAACCCG	633	twist_1678	ATGCTGTCATCGCAGCCCAA	14
twist_2417	CGGGTTCATATTCCAACGGG	633	twist_834	GGTTTGGACAGCAAGAGGCA	14
twist_3287	CATAATCTATAGATTACGCA	633	twist_3985	GGGCTGAACTGATCAACCAG	14
twist_2042	GAACTGATTGCGAAGACAGG	633	twist_487	GTTTCAGGATTTTTTCGAAA	14
twist_2155	CTGTACCGCTTGAAACGAAG	633	twist_2094	CATTCGCATAGCAATTTCGG	14
twist_332	CGTCTATCCCCGGCTAAACA	633	twist_1750	CGATGAATTGGGTCGCCGCA	14
twist_1859	TCACTAGATGGAACGCACCG	632	POLE2_3938	TAATACCTAGTAGTACTAGA	14
twist_1511	CTTATGTGAGGGTATAAAGG	632	twist_2377	GCACTAGTAACGGCGTTAAA	14
twist_1889	GTAGACAACCGCGCTTAGGA	632	twist_1538	CAAGTCACACCTGTGATGCA	14
twist_3744	CCAAAGAGATTCATTCAGAA	632	twist_243	TGTCGTTGAGACATATGGCA	14
twist_1642	CTACCGTCACTCCCTTGAAA	632	twist_510	TAGAGATAATTAGTTTGAAG	14
twist_3896	AAAGGGATCGAGCTGCTCAA	632	twist_2364	CTGATGATTACACCGAGGAA	14
twist_1990	CGTAGTTCTAAGGAAACAGG	632	twist_2172	GGATGTCTCCGAATTTTAAG	14
twist_362	ACGGAAAACTCCGCTTTAGG	632	twist_3908	CCTCCCAGTAATACGTTGAG	14
twist_3690	CAGGAGGGCCGTTTGCCCAA	632	twist_3172	CAATGGCCTATTGCACTGGG	14
twist_870	CAAATCCTCAACTATCGGCG	632	twist_1970	CAAAAAGTAAGTCAACCACA	14
twist_1978	CTGATTGATTAACTTCAAAA	631	twist_156	CCATCAGTCCCGTCGATAAA	14
twist_2010	CCTCGGCATCATGTAAAAGA	631	twist_4049	CTTTGGGAAATAAAGAAAAA	14
twist_703	CTACACCCACCCATTAACGG	631	MTTP_2102	CAGAAGGACATCCTTTACAG	14
twist_3514	CGAGCCTCCCATGAGTCACG	631	twist_2367	CTTATTTCTGAAATTTAAGA	14
twist_221	CCATCCACAGGTTCTATAAG	631	twist_2708	CGAGCCTCCCATAAGTCCCG	14
twist_3276	GAGCACCCTGTACAAAACCA	630	twist_3523	CATTTAAATTTTAATAACCA	14
twist_1152	CATGGCAGCCCACATTAAGG	630	twist_2617	TAAAGACTATGACCACACAG	14
twist_1476	CATAACTCCGACCTTATAGG	630	twist_2183	CTAAAAAACCTGTTTCAGGA	14
twist_2628	CATTAACCCTTACTGTTCAA	630	twist_1812	CGTTTAGTACATTAACGCCA	14
twist_2469	ATGGACCGTTTACATCTGCG	630	twist_270	CTATCAGGACCTGCAAGGCA	14
twist_7	ACTACACTCTATCCGACCAG	630	twist_2211	CTTTCCTTATTTAAATGCGG	14
twist_2971	CCTAACCTCCTCACATCCGG	630	twist_1467	CGTACGAGATTTAAAAAGAA	14
twist_2757	CTTGGGCCACGTTTTTTCGA	629	twist_4110	CAAGGGGCCTAGGCTACAAG	14
twist_3823	CATTGCCTAGTATTGCGACA	629	twist_4119	GATGAGGACCTATCGACAGG	14
twist_67	CGGGCTCCATTCGCGCTGCA	629	twist_1660	ACTTACCATAATAAAAGCAG	14
twist_1261	CCACATTATGCCCATAACAA	629	twist_541	CCGGTTCAAGCATCAAAAAG	14
twist_4012	CAGTGAAACTGCGCGTGACA	629	twist_139	CAAATATGCTCAACTATACA	14
twist_1069	CATTACGTAGTTAAGATGCA	629	twist_2239	CCGGCACCCATTCATTAAGG	14
twist_3429	CATCTCGATTGAGTGACCGG	629	twist_440	GCGGCTTTACCCTTACGAAA	14
twist_1286	CATTATCACCTAATGTTCAG	628	twist_3624	CTTTTAAATAGCTTTACCGG	14
twist_1108	CAGATACTCTTAATTCGAAA	628	twist_3645	CAATAGCTTACCATGTTAGG	14
twist_540	CCACGAAAATAACTAACCAA	628	twist_2471	CAATGACATATTGCACTGGG	14
twist_1395	CGGCGAATCGCAATACACCG	628	twist_52	CCGTGATGCCCATTACACAA	14
twist_3871	CGGTCTGGCCCCTAGATAGA	628	twist_1022	CGTCACTTACTGAAGTGGAA	13
twist_1105	CAATTGCCCATTGTTAGACA	628	twist_3664	CCGACCCTTTTACCAAGGGA	13
twist_3380	CGATGCTAAGCCCTGTGAGG	628	twist_2848	CAGCCAATTTGAAAGATCCA	13
twist_2633	CAGGCACCAAAAACAAAACA	627	twist_2850	ACGCTTAGAGATTAAAGCCA	13
twist_1427	CCAATCAATCTAATGATGAG	627	twist_2122	CCATGTATTCCACTTACAAG	13
twist_2500	ATGGACAGTTTACCTCTGCG	627	twist_3578	ATTAACAATATTCAACACAA	13
twist_2601	GGTTAAATCTTGGCGCCGGG	627	twist_1144	CATACTAGAGTAGATCCGCG	13
twist_483	TAAGACAACAGGGATTACCA	627	twist_2221	ACACAGTCATGCTCTTAGGA	13
twist_1341	CAGTTCCAAATAGAATCACA	627	twist_1342	CAACCTTGCCATATGTCGGG	13
twist_2929	TGGCACCCTTTTGAATAAAA	627	twist_3950	CTGTGACATCGTTAGTGCAA	13
twist_271	CCTGTATAAAGTCCGATCAA	627	twist_110	CTGCCCTCTGCAATGAAACG	13
twist_4189	ACTGCGAATCTTCAGCTAGG	627	twist_688	ACATAAGCATTGTTGTTCAA	13
twist_2702	CGGATAAGCTTACTAAGGAG	627	twist_2870	CAGGGGCCCCGCATACACAG	13
twist_1695	ACGTTAAAAATCGTAACGGA	627	twist_2127	ACTACTAAAAGTACGAGCAA	13
twist_3643	CGGATCAGCTTTCTAAGGAG	627	twist_3729	CTATCACACAGTCCGTTACG	13
twist_1856	CCAGATCACGAAATTTACGG	626	twist_3742	CTTATGTGCAACAAAAAAAG	13
twist_1149	CAGTATCTAATCCAACTCCA	626	twist_3536	CCTCTCGCAAGCCATCTCAA	13
twist_254	GGTAGTGCCGATTCACGGGA	626	twist_1118	TCTCCCAATAGGAATACGCA	13
twist_2783	CCATAAACATCATTATAGAA	626	twist_3332	CATTGACCCTTACTATTCAA	13
twist_1894	CTGCGACAAGAGCAACTAAG	626	twist_3339	CGTCAGAATGATTCTCGAAA	13
twist_3669	CGAACTACATCCTTACCGAG	625	twist_1928	TTAGCGGATTCTCTATCGGG	13
twist_948	CTGACGAGTACTGAGTTACA	625	twist_1251	ATTCATAAAATCAAAAAGAG	13
twist_4048	TGTACGGCATGAAATTGGGG	625	twist_2116	CCTCCTGGAAACTAGTAACA	13
twist_3822	CTACGTGATTAGCCATTAAA	625	twist_2144	CTTTTCTTAATAGCGTTAGA	13
twist_1559	CCAGGATAATACCATCCAAA	625	twist_651	CGAAACGACTGAATAAACGG	13
twist_1137	CAAATGTTCCAGAATACGAG	625	twist_2281	TGAATTTCCTCGAATTTGCA	13
twist_4009	CAATTGGGAGTTCCTAACAA	625	twist_2640	CTATTGACAGACTAATCCAA	13
IL3RA_2146	CGACAAACTTATCTGTGCAG	625	twist_3852	GCAGGCATAACTCCAAGAAG	13
twist_1519	AATTGTCGTAAAGCAACGGA	625	twist_3391	ACATAATACCCTTCTTGCGG	13
twist_2513	CCTGCCGTTATTATTCACCA	625	twist_3393	TGGTTGCCCAAGCCGCACGA	13
twist_3022	CGACTCAGCAAGACTTGAGA	624	twist_2276	CATGTTTATACTGTACACAA	13
twist_2359	CATACCCTATCCGATATACA	624	twist_2018	ATAGCCCTCACTAATAGGAG	13
twist_1707	GAACTGCATGCGACGACCGG	624	twist_893	CTAACGAGCTCTCTATGCGG	13
twist_1891	GAACAATGAAGATAACCCGA	624	twist_1753	TGGATGACTGGACCGCCAGG	13
twist_586	CCTCCCAGTAATACGTAGAG	624	twist_2035	TATAAATGACCTTCTTTAGA	13
twist_692	CAAGTGCCAGAAATGCTAGA	624	twist_2044	CTAGTACCCATAGCGACCAA	13
twist_2251	CTGGCACAACTACATTAAAG	624	twist_3407	CGTTACCCCCCTTTGTCGCG	13
twist_2553	CGATGCTAAGCCATGTGAGA	624	twist_563	CAGCGGTGCTACTAGACCAG	13
twist_2412	AAGCATAAATGTTATAGCGA	623	twist_2922	CAATGGGCCCGGTTTTGAGG	13
twist_2849	AGTGAAAACCTACCACCCCA	623	twist_1784	TTTGGCCGTCGTGCGACAGA	13
twist_1007	CTGCTATCCCTATTAATGAA	623	twist_2895	ACTACACTCTATCTGACCAG	13
twist_1964	CCGTTGATACCCACGATCAG	623	twist_833	CGTACTGATCTTACAAGGGA	13
twist_1691	GCTGAAACATGATCGCCACG	623	twist_1754	CGGGTGCGCTTCCATACCAA	13
twist_33	CCGAAGGCAGTGCAGCTCAG	623	twist_681	CCGGTGCCTTACCCATCCAA	13
twist_2451	CTGATAGAACACACAACCCG	623	twist_1254	GATACTCTTCAAGATTTGGA	13
twist_1890	CTAGTAGTAGATACATGAGA	623	twist_2603	CTATGAGTTTAGCTTCTGAA	13
twist_4211	CAACTAATTTGAAAGATCCA	623	twist_3994	CTATGAGAACGTCTTACCGA	13
twist_3742	CTTATGTGCAACAAAAAAAG	622	twist_699	GCACCTTGCAACACATTGGG	13
twist_3800	AATACACTCTATCAGACCAG	622	twist_2267	CCTGCTACTGGTCATATGGG	13
twist_2275	CAGATATCCAGTTTACACCG	622	twist_2530	CAATTTATTCACATGTCCAG	13
twist_3463	CCTTGAGCATTTATGAACGA	622	twist_2701	CCGAAGGCAGAGCAGCTCAG	13
twist_535	CAACTTCCTGACGTTTCACA	622	twist_3251	CAAATTACTGACCAACGCAA	13
twist_3661	CCTCAACATCACCCTTTCGA	621	twist_2961	CCACATACATAATATCTAGA	13
twist_1052	CGGCCTCTCATGCCTTGGCA	621	twist_2781	ACGTCCACTTTTCAGTTAAA	13
twist_2177	CTGCCCTCTGCAATAAAACG	621	twist_3561	ACTGCAAATCTTCAGCCAGG	13
twist_3947	CTGTGCTGCACCAATAAGCA	621	twist_1296	CTGTACCTCGACAATATGCA	13
twist_3030	CCGAGCTGAATAGTGCCAAA	621	twist_2583	AGAATTTCCTCGAATTCGCA	13
twist_2267	CCTGCTACTGGTCATATGGG	621	twist_815	AAGCACACTTTGCCGCCCCA	13
twist_1098	CGTCGACCTAGCCATACAAA	621	twist_1911	CGGGCTCCAAAACAGACCGA	13
twist_769	CTGACCATACCCAAGATGCA	621	twist_153	CATTGAAATCTGTAGTGACA	13
twist_2825	CCACATACATAATTTCTAAA	621	twist_4132	AGTGTCGCACCACTACCGAG	13
twist_1190	CATGTGTCCCAGTCTCCCCA	620	twist_3567	CAGCACGGTTTTTATCACAA	13
twist_1558	CCGGTGCCCCAATTACAAGA	620	twist_3827	CGTCTCCGCAAGACTTGAGA	13
twist_3727	CTGGACACTCTATCACCGGA	620	twist_2195	CGTATCAACTAAAAACTACG	13
twist_857	CTATTGACAGACTAATCCGA	620	twist_1509	CTGCTTCCCCGACCGTTCCG	13
twist_3066	CCTACAAATGCTCCTTGGCA	620	twist_3613	ACAGGGGACTGCAAGTTACA	13
twist_1448	TGTACGCCCCGACATACAGA	620	twist_4228	TATGGAAGCCCTGTGCGAGA	13
twist_3085	CAAGTTCGTTGTGTGCGAAA	620	twist_911	CGTTCCCCTTAAGATTACAA	13
twist_744	CGTCTGAATGATTCTCGAAA	620	twist_1133	CTTATGTGCAACCAAAAAAG	12
twist_3174	CTGGCTCCTATACTGATAAA	620	twist_1491	AAGCCTTCAAATTCTACCCA	12
twist_3241	CGTTACCGAGCCTCTTCCAG	620	twist_632	CTGAGGTAAGAAAATCAAAG	12
twist_4193	CCGCATACATAATTTCTAGA	620	twist_3296	GCTACACTCTATCCGACCAG	12
twist_1563	CCGGACTTCCACCTGACCCG	620	twist_957	GAAATCCGAGATATTCGACG	12
twist_1514	CTGCTGTTAACACCGAAGGA	619	twist_2128	CGAAGAGGACTATAACGGGA	12
twist_2657	TAACAGATCCCACTTTCAAG	619	twist_1814	TAGGATTGCAAGGCTCCCCA	12
twist_861	CTGTCCAGAGGATTAAGGAG	619	twist_3012	CCTCAGGTCGATCTTCACCA	12
twist_406	CGATCCGTTACGGCTCTGAA	619	twist_3046	GAATAATTTACACAAACAGG	12
twist_4122	CAATGACGTATTGCACTGGG	619	twist_2746	CATTAGTTTTGGGCGTTCAG	12
twist_1991	CATACCCTAATACATCGCCG	619	twist_1622	CTGGAAACCAGGTAAACCCA	12
twist_3641	CCGACGTATAGAGCTCGCAA	619	twist_2654	CTTGCCATCCAGCATCCCGG	12
twist_474	ACTAGCAGTAACCCGCAGAA	618	twist_2453	CTAATAGAACACCCAACCCG	12
twist_3879	TCACTCGGCAGGTATATGAA	618	twist_2506	ACTGTAAACGATATACAGGG	12
twist_3080	CCTACTCCTGGTCATATGGG	618	twist_3074	CAAAGTGACCGGTCTAGAGG	12
twist_2958	CGTCACTTACTAAAGTGGAA	618	twist_3787	CGATGGGCCCGGGTTTGAGG	12
twist_4155	CAGACTTGTCATAAGATAAG	618	twist_3316	CGATGGGCACGGTTTTGAGG	12
twist_2942	CAAACCTGCTCTGAGTGCCA	617	twist_2520	AAAGGGCGAGCCCTAAAACA	12
twist_1904	CTGACCCCTTCGAATCAAAA	617	twist_1657	ACATAACACCTACTGTAGGG	12
twist_3251	CAAATTACTGACCAACGCAA	617	twist_2388	TAACAGATACCACTTTCCAG	12
twist_933	GGACCTGAAAGTGAAACCCA	617	twist_190	CTGCACTACCATTAGACCGA	12
twist_1100	TAGCAACTCCCGCTGAAAAA	617	twist_819	GCTACAATAGCTGCTCAGAA	12
twist_3025	CATCCGATCTTAAAATTCAG	616	twist_1851	GGTACCGAACCATATTCACG	12
twist_180	CAGATATCCAGTTCACACCG	616	twist_3986	TGGGGCCCCCTATTGCCGAG	12
twist_2883	ACACTTAGAGATTAATGCCA	616	twist_347	TTTGCAGCAACCCCGCGACA	12
twist_1854	ACGGAACCTGTTCAGTGGAG	616	twist_2912	CTTTGGCCACGTTTGTTCGA	12
twist_3096	GCACCCAAAGGCAAGTCACA	616	twist_1802	CTTGCAATCAAAATTACCGG	12
twist_1538	CAAGTCACACCTGTGATGCA	615	twist_1496	CCACATTTCCTTACTATCCG	12
twist_577	CCAAAAAATAGCATAAGCGG	615	twist_1070	ATGACCTTTTGGACATAAAA	12
twist_4113	AGAACTAAAGATATTTCAAG	615	twist_1783	CTTGTTTACGAGATGAAAAA	12
twist_1077	CGTGTCCGATATAAAAACGA	615	twist_3427	CATCCGATCTTTAATTTCAG	12
twist_1202	CTGAATCTACTGACTAACAG	614	twist_2784	GCGCGACGTAATCTGACCAG	12
twist_446	CGGTCTTATTGCATATACAA	614	twist_3140	CAAGTGCCAGAAATGCTAAA	12
twist_1253	CGAGCTCACCCAAAACCCGG	614	twist_959	CGATAGAGCGATGAATGCCG	12
twist_2334	CCATTTGAAAGAACTAGGAA	614	twist_2142	GCTTGTCCATGAGTGATAAA	12
twist_1581	AGAAAGCCCGGGTAAAGACG	614	twist_987	CATCATCCCGAGGCTTTCGG	12
twist_3341	GAATCAAGAACTTAACAAAA	613	twist_62	TGAAAAGACCATCTACAGAG	12
twist_2650	GCGCGCTCCCTATAGCAACA	613	twist_1615	CATTATGACATTGTTACAGA	12
twist_54	CATCTTGATTGAGTGACCGG	613	twist_3799	CTATCACCCAATCCGTTACG	12
twist_1496	CCACATTTCCTTACTATCCG	613	twist_665	CGAAGTGACCGGTCTAGAGG	12
twist_1302	CATCACTATTAACTAATACA	613	twist_2203	TAAAGACTATAACCACCCAG	12
twist_1780	CTTCCGCCAAACATGCTGGA	613	twist_1777	CGAAGGACTGAGCATCCGGA	12
twist_638	CTTACAGACACTTAGCACCG	613	twist_2065	CTTCCTTTACCCAATTCAGA	12
twist_3760	CGGTGGTCTCCGACTAGAAG	612	twist_4022	CTTTACATCTACCAGTCAAG	12
twist_1023	TAGGGAAGCCCTGTGCGAGA	612	twist_1626	CTTAAAAATCCCAAACAAGA	12
twist_2519	AGGATCAGCTTACTAAGGAG	612	twist_4037	CCTCACGCTTCCATAAGAGG	12
twist_3424	CCTCATGAAGAACCAATACG	612	twist_2279	CCACATACATAATTTTTAGA	12
twist_2198	CTAAAATTTCCATAACACGG	612	twist_671	CCGGGCGAAGCCCAATACGA	12
twist_1112	AAACTGCACAGCCAACGCCG	612	twist_1972	CCAAAACACATTTTATCCCG	12
twist_4202	AGATGACAAAACGATCTCCG	612	twist_3440	TAAGACCCTATTCTTAAAGG	12
twist_3701	GCATGCCTATGGCCAAACGG	611	twist_2618	CATAGTGAACTAGTTCACAA	12
twist_1539	CCGTTGTGCCCCCCTACCAA	611	twist_763	CAGCCTCTCATGGAGCCGGG	12
twist_3111	GAGCCGCGATTCGCTCCAAA	611	twist_3549	GCAGACCTTTGGTCTTCAAG	12
twist_2807	ACTCGGCGCGAAACGCTAAA	611	twist_3287	CATAATCTATAGATTACGCA	12
twist_1619	TGGTTGAAAGTGAAACAGGA	611	twist_4104	GGACCGCTAACCATGCCCCA	12
twist_3288	GCACCTATCATCGCATTCAA	610	twist_661	CGTGGTAAAAAACAGTCAAG	12
twist_1615	CATTATGACATTGTTACAGA	610	twist_2050	CGTTCCTTTTGCCAGTTACA	12
twist_2738	ACATCCCACCGAGATAAAAG	609	twist_4125	CGTACCTATAAACCTTTGAG	12
twist_3843	AGTCCGGGCATAGCAAGGGG	609	twist_199	CGGTGGCCTCCGACTAGAAG	12
twist_1967	CAGCTCGTTGGACAGCGAAA	609	twist_546	CATATACCATCACTTAACCG	12
twist_2249	GCACATGACCGTCATTTGAG	609	twist_1148	CCACATCGTTGTATGCAGAA	12
twist_347	TTTGCAGCAACCCCGCGACA	609	twist_1852	ATACTGTGAGAGACACAGCA	12
twist_380	TCGGTTGTAGTGATTCTAAA	609	twist_2724	CAGATATACAGTTCACACCG	12
twist_3349	CGGGCTCCAGCTGCTAGACG	609	twist_1263	GTGAGCGTACGCCAGACAAA	12
twist_1811	CTTCACATCCCGACACGACA	609	twist_2725	TTAACCTGAGTGTAGCCGAG	12
twist_2572	CAATGGATTACCATGTTAGG	608	twist_2731	CGATGCTAAGCCCTGTTAGA	12
twist_904	ATGTCAGGCGGTCCAAGCAA	608	twist_298	CTAGTGTGATGTCCTATGCA	12
twist_3411	GGGCTAAACTGATCAACCCG	608	twist_2206	AAGGCTACTGATCTACCAAA	12
twist_2819	CGAGCCTCACATAAGTCACG	608	twist_3646	CCACCTAGCTACGTGTGACA	12
twist_3516	TGGATAAACTCGGATTAAGA	608	twist_1452	CCGGCGTATATAGATTACCA	11
twist_3940	CTAAGAAAAGAACCATACAA	608	twist_1651	AAAGCGTGACTCCCACGAGA	11
twist_4160	CGAGACTCTGTCGAAAAAGG	608	twist_2719	CTAAGGTAAGAAAATCAAAG	11
twist_1789	CATTCAAGCCAATTTTCCCA	607	twist_1544	CGTTCTCAATGCTTGCCGGA	11
twist_4083	ACTACACTCTATTCGACCAG	607	twist_1282	TAGTGATCTCTCATTCCGAG	11
twist_977	CAGTACAAATCCTCGCTGGG	607	twist_3954	CTGATGTAATTGAAGCCCAG	11
twist_3190	CGACTCTTTTTCCCGATGAG	607	twist_777	AAGCGTATAAGCGTGAGGAA	11
twist_4028	TAACAAGGAACGCTTCCCGG	607	twist_3294	CTTACCATCCCGCATCCCGG	11
twist_1209	CTGAATCCCGCGCTATAACA	607	twist_3694	TCGGTTGTAGTGATTCAAAA	11
twist_1912	CTAAATGGTGGCATATTGCA	606	twist_3696	CTGCTCCTTGTTGAAACAAA	11
twist_2458	CCTAATACCACAACATACGG	606	twist_3470	CCTCGCCGACACTAACACAA	11
twist_2217	ACTCAAGACTGTGTTCGAAA	606	twist_2647	CAAAAGGACACACCGCGCAG	11
twist_2821	ACGACGCTTCTACCAAGACG	606	twist_2686	CAATCTATTTCACAAATACG	11
twist_1918	CAAATGCTACGGCCTCTAAG	606	twist_2564	CGTTTCTATGATTAATCCCG	11
twist_2316	CTAGACTTAACCTAGCCGAA	606	twist_614	CATGAGAGTAGAATTCTGAA	11
twist_4205	CATGGGCCACGTTTGTTCGA	606	twist_3063	CAATCTCGTTATTAACCCCA	11
twist_4227	AGTACGTGATAAAAATACAA	605	twist_83	CTTATATACCACACTCAAAA	11
twist_1398	AGAAAGTTTACGAAGACAAA	605	twist_1728	CGTTCCCAACATCAGCAACA	11
twist_101	GATCGATGCCTAACAATCGA	605	twist_1130	AGGGTCTAATGATTACTCCA	11
twist_2717	ACACAGTCATGCTCTCAGAA	605	twist_122	TGAATTTCCTCGAATTCGCA	11
twist_3671	GAGCCGCGATTTGCTCCGAA	604	twist_1283	CCGAAATAAAATGAATCAAA	11
twist_1133	CTTATGTGCAACCAAAAAAG	604	twist_1225	CATAGCAGCATATCTCTGGG	11
twist_2620	CTGTGGCCTCCGACTAGAAG	604	twist_2899	GAGGCTACTGATCTACCGAA	11
twist_269	TCGGCCCTTATCGCGAGACA	604	twist_1446	AGTCCCTACTAAACGCAAGG	11
twist_1201	CCACACATTCCCGAGTCCAA	604	twist_2293	CATATTAACTCAAATAGACG	11
twist_2069	CGTGTTGAAGTCTTTCGCCA	604	twist_132	AATTGTCCTGCGCTATTAGA	11
twist_742	CGTACAGTCTGCACTTCGAG	604	twist_339	TTTCCATCTGCGTCACAGGA	11
twist_3556	TAACAAGGAAAGCTTCCGGG	604	twist_1299	CCTCCACGTAGGCAACACGG	11
twist_2364	CTGATGATTACACCGAGGAA	604	twist_3109	CATGATATAAAAGTATTGGG	11
twist_328	ACTGTAAACGATATACCGGG	604	twist_594	TCTGAGTTACCCGCTTCGGA	11
twist_1775	TGATAACGATACGCGTGAAG	604	twist_39	ATTTGGGCTATATTGCACAG	11
twist_3788	CTAGCCACAGTCTAAAGACA	604	twist_255	CTTGTTGATTATTTGCCCCA	11
twist_1641	ACACCCTTCTAATCTAGACA	604	twist_402	CGACTTTTTCTGTAATAAAG	11
twist_2721	CTGAGCAAACTCCAGTACAG	604	twist_703	CTACACCCACCCATTAACGG	11
twist_248	CTGCGGCCATACCAACCACA	603	twist_1393	GTGGTCCAAGCAACAAGGCA	11
twist_3438	CGGGCCCCCAAATCAATCCA	603	twist_2588	CCAACAACAGTCCATTCAAA	11
twist_3904	ACGCCGCTTATACCAAGACG	603	twist_1729	CAAGTCACAAACTCTTTCAA	11
twist_3548	CTAGCCTTAACCCAGCCGAA	603	twist_3408	CCAAACAGTTTCCATTCGGA	11
twist_1927	CTGCTACTTCACAAATCCGG	603	twist_2300	TCGCCTCACTACCATTTGCA	11
twist_3081	CGTTAGATCTTGGCGCCGGG	602	twist_1129	CTGCTATTCTAAGTATCCCA	11
twist_3316	CGATGGGCACGGTTTTGAGG	602	twist_3933	CCATTAATATATATGTCACA	11
twist_1664	CGGTATTATCCTCAAAAACA	602	twist_3439	CTGATGTATTTGAAGCTCAG	11
twist_2293	CATATTAACTCAAATAGACG	602	twist_1733	TGGCATTAAACACAACCACG	11
twist_1361	CTGGCTCCTATACTGATAGA	602	twist_3967	CAACATCCTGCCTTGTCGCG	11
twist_3166	CTTGGTCCACGTTTGTTCGA	602	twist_1373	CAGCATAACCAAACTCTCGG	11
twist_421	AGACAACACTGAGCAACAAA	602	twist_1713	CGGTACCATTCTACTATCCA	11
twist_2022	CAGTGCACTTCCGTTCCCCG	601	twist_1433	CGTTCGAGCTATCTTTACCG	11
twist_3455	CTAACCTAAGCACTGTGCAG	601	twist_363	CTGACCTAAGCACTGTGCAG	11
twist_2005	ATACTGAGACTAACATCGAG	601	twist_1721	CTTGATAGAACAATGAAGGG	11
twist_1295	CGGTCACTTGTTCATCAGAG	599	twist_1992	CTAGGCCAAGTCACTAAAAA	11
twist_2950	CCAAACACTTGTCATCCACG	599	twist_3161	CCGCCGTCTATTAAATTCGA	11
twist_915	CGTAGCCACCACGATATACG	599	twist_3795	CTATTTTTTTAATATCGAGG	11
twist_1468	GCTCCTCGCGATTCACCCAG	599	twist_1893	CATATTCCTCCTGCAATCCA	11
twist_4130	CTATAAGAAAAGCATCAACA	599	twist_2092	GCGGTAGTACGTTCAAGAGA	11
twist_1126	CATGATCCAACATCTCGAAA	599	twist_2528	CGTGAAAGCAGCATACTAAA	11
twist_2735	GAGGCCAAACCCTCACGCAG	598	twist_526	CGGGATACAAAACCACAGAG	11
twist_3023	CTTTAACAATAGCAGAAGAA	598	twist_3495	CAAACCTGCTCTGCGCGCCA	11
twist_3367	GCGTGCTTTGGGACATACGG	598	twist_3202	GCGGCCCTACGTGTTCCAAG	11
twist_1879	TGAATCAATGTTCCGCTAAA	598	twist_3250	ACTACGCTCTATCCGACCAG	11
twist_90	CGAGCCTCCCATAAGTCACG	598	twist_34	GCTGCGACTTCGCAAACCCA	11
twist_171	CCAACGTCCGACCCACGCAG	598	twist_778	AAGTTAAAACCTACATGGAA	11
twist_2336	CCTTAGGCAGGGCTTTTGGA	598	twist_2254	ACTTTACATAAATTGATACA	11
twist_3686	CGATGGTCCCGGTTTTGAGG	597	twist_3517	CATGTTTATTCTGTACACGA	11
twist_242	CCTAATCACTCCTTTTCGAG	597	twist_1934	CGAACCTCTGCCATGTGGCG	11
twist_1555	CGTCATATCCGCGCGAACAG	597	twist_557	ATTCGAGGTCCTTAGACCCA	11
twist_2201	ACTTGAGACTGTGTTCGAAA	597	twist_1892	CTATTTCATGACTCGCTCCA	11
twist_2860	CTGATGATTACCCAGAGGAA	596	twist_2676	CAGATATCCAGTTAACACCG	11
twist_3035	AAGTCCCAAATGACACGGCA	596	twist_2820	TAACGCGCTAACTCACACCA	11
twist_1704	CCTACGGTCATCCCATTGCA	596	twist_2371	CCATAGTCCCTAAAGCAGAG	11
twist_725	CTGCCTCGCTACAAATGAAA	596	twist_3468	CGATGTCCACTATAGCAACA	11
twist_3874	CAGTTCCACACTCCGTTCCG	596	twist_3575	AAGGATAAAGCTGTTAACAA	11
twist_3129	CCTCATAAATACAAACCACG	596	twist_3577	ACTATACCTTTGCTGCCGCA	11
twist_3449	CGAACTCTCCTGGTATAACG	596	twist_3317	CCAAACACTTGACATCTACG	11
twist_2180	CCTTCCTCACTTCCTTGACA	596	twist_3256	GGATGTATCCGAATTTCAAG	11
twist_546	CATATACCATCACTTAACCG	596	twist_2834	CTGACTGCCCGGTCTCCCCA	11
twist_2548	TCGGTTGTAGTAATTCTAAA	596	twist_217	TCTTGGGCCATACCTATAAA	11
twist_1576	CCAACGACTAACCTGCGGGG	595	twist_1898	CTAGTAAGACTAGATCCAAA	11
twist_1886	GCGCTTCACACTCCGACGAG	595	twist_2994	CCGCGCCGACACTAAAACAA	11
twist_2017	CGATGTCCACAATAGCAACA	595	twist_2632	AGATGCTAAGCCCTGTGAGA	11
twist_3165	AAACAGTCATGCTCTCAGGA	595	twist_4194	TTATTGAATAGGAAAACCAA	11
twist_1586	GATGCAACACGTAATTCGGG	595	twist_3745	CGTTAAAGTGTAACGCTACG	11
twist_1726	CGTACTTTAACCAATTTGGA	595	twist_4196	ACATAGAACGCTCTTCTCAA	11
twist_1727	ACGGCTCATTACACATGCAA	595	twist_4094	ATGAACAGCTTGGAAACGAG	11
twist_1509	CTGCTTCCCCGACCGTTCCG	595	twist_1115	CATAAATCTGGTCAAAACAG	11
twist_4224	CCTGACCTCCTCACATACGG	595	twist_1708	TAGGGACGTACAGAGTCAAG	11
twist_1169	ACTCTAATACTCGAGAGGCA	594	twist_1136	CATCTACACCAGTTTCCACA	11
twist_2197	CATTAAAATCTGTAGTGACA	594	twist_3653	CAATTGACCAACTTGCAGGA	10
twist_319	TCAGGGCTCGATTTGTCAAA	594	twist_287	GCATATACCCCTATTTCAAA	10
twist_1762	ACTCAGCTACGTTCATCGGA	594	twist_1848	CGACCTGACGATACAATAGG	10
twist_1934	CGAACCTCTGCCATGTGGCG	594	twist_1132	GCAGCGGTTTTTGCAACGGA	10
twist_2101	CAGGGCCCACGTCCGAGCCG	594	twist_3026	CAACATCCAGCCTTGTCGCG	10
twist_2477	CCTGCTCCAGGTCATATGGG	594	twist_1172	TGGGCGGAACACTTATGACG	10
twist_2642	CGTGACAGCAGCATACTAAG	593	twist_422	AAATCTACCAAGGAAATACA	10
twist_931	CGGGATCTCTGCAAGCCAGA	593	twist_3697	CTAGTTCGTTGTGTTCGAAA	10
twist_841	CCTCGGTCCTAAGTAAAACA	593	twist_1259	CTACGTGATTCGCCATTAAA	10
twist_1409	TAGACCCGTATCCATAGCCG	593	twist_2862	TAGGGCCCAGCGTTAATCGA	10
twist_3151	TCTTCCGTACGTGAATGCAA	593	twist_3032	CAGCCTGGCACCTCACAAGA	10
twist_293	CAATTACCACGCGATTCCGA	593	twist_3709	TTAGCCTTAACCTAGCCGAA	10
twist_3014	CGTCAGTGTTACATACCGAA	592	twist_522	TAAGACCCTATTCTTCAAGG	10
twist_863	CGATGAATAGGGACAATAAG	592	twist_1476	CATAACTCCGACCTTATAGG	10
twist_2748	CATTCGATCTTTAAATTCAG	592	twist_1524	AGTGGGTTCATGTTGTCACG	10
twist_302	GCGCGACGTAATCTGCCCAG	592	twist_1340	CTTTACCATGTGTAGACGAG	10
twist_1097	CTTACATCAAAGCCGCGCCA	592	twist_666	CGTAATAAAAGGTTATTCGG	10
twist_3982	ATGGACCGTTTGCCTCTGCG	592	twist_1422	CCATGGGTCCCAACTAAAAG	10
twist_943	CCACGTCCCTGCGCGTGAGA	592	twist_1667	CTAAGACGTAATTAACTACA	10
twist_2817	CGGCCTGGCACCTAACAAGA	592	twist_1331	ATACGGGTAATGACTCACAA	10
twist_2449	CCTCAGGTCGTTCTTAACCA	591	twist_3338	TTTCATGATAACACTTCGGG	10
twist_3333	CGGGCTGCATTCGCGCTGCA	591	twist_1193	CCTCCAGGCTGCGCTATGGG	10
twist_597	CTAAGAAACGAACCATACAA	591	twist_1174	CTTCTGTTCAGATCACTGAG	10
twist_2424	CTGAGCAAACTCAAGTCCAG	591	twist_2505	AAGGGCCCTGCGTTAATCGA	10
twist_268	TCACCATATCTAGATAAAAG	591	twist_1999	ACATCTTGTCCGATATTCCG	10
twist_259	GAGCATAAATGTTATAGCGA	591	twist_3817	CCTACCGGTGCACAGACAAA	10
twist_765	CCAAAGGTCACGACTTTCGG	591	twist_3286	AGGAGGTTCTATGATAACCA	10
twist_2320	CGATGGATCACATAGCAACG	590	twist_3833	GGGCAGACACACCATCTGGG	10
twist_3381	CCTACAATTACTCCTTGGCA	590	twist_2282	CGAAAAGGACCTAAATCCAA	10
twist_4075	CGTAATAAAACTCCTATAAG	590	twist_474	ACTAGCAGTAACCCGCAGAA	10
twist_3433	CATACTAGAGTAGATACGCG	590	twist_804	CCATACGTTCTAAATTGAAA	10
twist_3231	CGGGACAACGCCATAAAAGA	590	twist_481	CATTTAAATCTTAATAACCA	10
twist_2505	AAGGGCCCTGCGTTAATCGA	589	twist_3227	AATTAATCCTGGAAACTCAA	10
twist_2465	CTGCTGCTTCTATCGATCGG	589	twist_2294	TGGGGCCCTTTATTGCCGAG	10
twist_2610	CAATGTCTTACCATGTTAGG	589	twist_1246	TAGGTCTACCCTCAACGCGA	10
twist_1347	CAGAATATAACCTCTCAAAG	589	twist_3906	CATCCGTCATTGACTACCAG	10
twist_1127	TAGCACTGACAACCGAGCAA	588	twist_1440	ACATTTAACGAATATTGACG	10
twist_2318	CCTAATCACTCCTTTTTGAG	588	twist_3898	GTAGCATATGCTCCTATCCG	10
twist_1997	CGATACCTCCCCAATAGCCA	588	twist_776	GCTGGTCACATACATATCCA	10
twist_1072	CCTATGCCTAGTAAGTAAGA	588	twist_783	CTGTTACCTCCGAAATGCAG	10
twist_533	CATTTCCAAGGCGAAACCAG	588	twist_787	CCATGACCATGCGCGCCCAG	10
twist_2487	GAGGCCCAACCCTTACGCAG	588	twist_2791	TTTACATCTGCGTCACAGGA	10
twist_1845	CTGATGTATTTAAAGCCCAG	587	twist_1551	CCTTAAGTTTTGTCTCCCGG	10
twist_1482	CCTACTTCATGTCTGTGAAG	587	twist_1826	TTACCAGATTACGATTTAGG	10
twist_3518	CTAGTGCCAGAAATGCTAGA	587	twist_334	CGTATCGCCATCTAGTACCG	10
twist_1987	ACTATATACGGGATGATCCA	587	twist_2680	CGGCATCGATAACAGAGGCG	10
twist_3230	CTGCCTGCCCGGTCTCCCAA	587	twist_549	TGTCCGACCAACGATTAAGG	10
twist_3253	CGAACTCTCCCGGTATAAAG	587	twist_2599	CCTAGTGAAGAACCAATACG	10
twist_669	CGGTTCCCATTTAATAAGAA	586	twist_2939	CTTATATACCACACTCAAAG	10
twist_1569	CCATTCATTAAAGTTCTGCA	586	twist_507	CTGTTTACCTAAACTTGGCA	10
twist_550	CTATGACCCCAATTACGCCG	586	twist_710	CGTCGGCTTAGCGTTCGAAG	10
twist_3757	CTGTAATGTTTATTATGCCA	586	twist_2807	ACTCGGCGCGAAACGCTAAA	10
twist_2682	CCTATAAGATTACAGATCCG	586	twist_3513	CAAGTGAAAGAACATATCGA	10
twist_3160	CCTGCTGCTGGTCATATGGG	586	twist_2706	CAGCTTATTTCTGTTTAGAG	10
twist_701	AATGTGCGAGATATAACCCA	586	twist_2176	CTATAGCACTGTCCTACGAG	10
twist_710	CGTCGGCTTAGCGTTCGAAG	586	twist_1786	CCGCTTTCACTAGTTCACAG	10
twist_1522	CTACCGATAAGTATATGACG	586	twist_1112	AAACTGCACAGCCAACGCCG	10
twist_392	CTTCCCGTTCGCTATTACAG	586	twist_1778	ACATATCCCAACCCGTACAA	10
twist_706	CGTGACCATCTTGATTCGCG	585	twist_277	CAACCAATTTGAAAGATCCA	10
twist_3038	CGATACAATTTGGCTACAGA	585	twist_1677	CAACTGATATAAGTATGCCA	10
twist_2745	CTGTTGCGCGAGGAGTACAA	585	twist_2795	ATAACCTGTGTGTAGCCGAG	10
twist_2820	TAACGCGCTAACTCACACCA	585	twist_488	CGTGCATTCGCATTGTTCCA	10
twist_936	CCAGTGAAAACACTTTTCAA	585	twist_1072	CCTATGCCTAGTAAGTAAGA	10
twist_1552	GAAAAGAGCATCGTATTAAA	585	twist_2078	CCAGGAAGTTAGTTGTCAAA	10
twist_574	CTTACAACTCTCACTACGAG	585	twist_1633	GCTACTCGATTCCATACCCA	10
twist_3848	GCAACCATAGGCAAGTCACA	584	twist_4102	AATGATCTAGGGACTATGGG	10
twist_3102	GCACATGACCTTCATTCGAG	584	twist_2370	CTACTCAGCTTTGCGTCCAA	10
twist_136	CAATCTCGTTAGTAACCCCA	584	twist_970	CTGGTTAATAATCCATAGAA	10
twist_3885	TAACAAGAAACGCTTCCGGG	584	twist_798	CAATGTGAAAAATATATACA	10
twist_4082	CATTTTTTCGCTGAGCCACA	584	twist_2437	CTTGGGACACGTTTGTTCGA	10
twist_3460	CAAACCTGCTCAGCGTGCCA	584	twist_3224	GGGTTCTACCACATGACAAA	10
twist_1176	TCAGGGAAAAAGTTGTTAAA	584	twist_3139	CTTCCCGTTAGCTATTACAG	10
twist_2391	GCGCCATATGAAGATTCCCA	583	twist_1869	CGTAGAAGAATACAGCACAG	10
twist_1950	CAAATATGCTCAACTTTACA	583	twist_3721	CAAACCTGCTCTGCGTACCA	10
twist_2495	GCGCGCTCCAAATAGCAACA	583	twist_849	CCTAAATATCGCCCTACACG	10
twist_1015	CTAAAAAGCCTTGCGATGGG	583	twist_2627	GCACATGTAACGGCGTTAAA	10
twist_1291	TTGGGTGATACAAAATCGGG	582	twist_4159	TGAAACCGTCCTGCGTCAAG	10
twist_2038	CAGACCTACATTCTGTCGCG	582	twist_1031	TCTCTGCATGTACAGTTCAA	10
twist_4128	CAAGGTATTGAAGCTAAAAG	582	twist_3240	TCTTGGGCCATACATATAAA	10
twist_1532	CAACTTTGAGAGGTAATAGA	581	twist_2991	TGATCCCCTCCCGATAGCCA	10
twist_2100	CCGGGGCTATGCATGTTGGA	581	twist_4176	CATGACAGCAGCATACTAAA	10
twist_3544	CCGGTTCAAGCATCAAAAGG	581	twist_620	TTTTCCACCGCGGAGTTAAA	10
twist_2034	CTAGGCAATGCTCTTCTACG	581	twist_908	CCGCCTTTAAGCTTGCAAAA	10
twist_2609	TCAAGGCAAATTTAAACAAA	581	twist_1237	ACATATTTAGCATAGAAGAA	10
twist_1972	CCAAAACACATTTTATCCCG	581	twist_3537	CAGCGGTCTCCCCAACTGGA	10
twist_1443	CTTGCGACTGAGCTAATCGG	581	twist_1793	ATTGCCAATACGGCGAGAAA	9
twist_3245	CATGTTTAAACTGTACACGA	581	twist_1228	CATTGTCTAACGGAGTAAGA	9
twist_3448	CCGTGAACTCTCACTAGCCG	580	twist_1941	AGGAACGGAAATCCTCTGAA	9
twist_2053	TAACTCGGATTATTGAGAAG	580	twist_3282	CCGACGTTTAGAACTCGCAA	9
twist_2706	CAGCTTATTTCTGTTTAGAG	580	twist_2845	TCTAAATCTTCGGTTCACCG	9
twist_1588	GAAGAGGACCTATCGACAGG	580	twist_2153	ATTGTTTAAATTAAGTAACA	9
twist_3211	CTTCCCGTTCGCTATTAAAG	580	twist_2261	GTTTCAGGATTTTTTTGAAA	9
twist_1806	CGGACCTAAGATTCACCCCA	579	twist_2082	GGTTCATGTGCCCTACGGAA	9
twist_1420	TAGGTCAATAGTTAGTCACG	579	twist_3167	ATAGGCCAAGTCCTTCTGGG	9
twist_811	CTACAACCTAAAACACCCCG	579	twist_1221	CCGAACCCACCTCCAAGAAA	9
twist_3939	CTTTGGGAAATATAGCAAAA	579	twist_3304	GGACAAACACCTGTTTACCG	9
twist_2584	CGATGCTGAGCCCTGTGAGA	578	twist_3183	GGGGCCCAACCCTCACGCAG	9
twist_2953	CTGACACCACTACATTAAAG	578	twist_3310	CGACAGATTGTCATAACAGG	9
twist_2369	CAATGGCTTACAATGTTAGG	578	twist_1197	CGATGCATCACAACTTCCCA	9
twist_1670	CATAGATTCCTTTATTGCCA	577	twist_676	AGACTCATTCAACAGCTCCG	9
twist_2056	AAAGGGGATGCCGAATTAAA	577	twist_3749	CTGGGACCACTACATTAAAG	9
twist_1657	ACATAACACCTACTGTAGGG	577	twist_796	GCTACACCTATTTTTTAACA	9
twist_1781	ATAGTGCATCCAGTTAGCAA	577	twist_2323	CGAGCCTCCCATAAGTTACG	9
twist_791	CTAGTGGGTCTCAATAGAAA	577	twist_751	GGGTTGCCCAAGCCGCACGA	9
twist_2385	TAACAGATCCCACTTTTCAG	577	twist_480	TAAGAATCCCTCCTGATGAA	9
twist_4061	CATCCAATTTGAAAGATCCA	577	twist_916	ACTGATTACGGGCAACCAAA	9
twist_2545	CAGTGCACTTACGTTCCCCA	577	twist_76	CTAATTGCTGTAATTCTCAG	9
twist_1874	GTGCCAGATCTGACTATACG	576	twist_1280	CGACAGATTCCAACACTCAA	9
twist_169	CCGGGTTGTACGAAGCCCCG	576	twist_738	CTACCAATTTGTTTACCGCA	9
twist_121	CATCCTCGTATCCTGTGAGA	576	twist_1974	TTGTTTTATAGAAATATCAA	9
twist_1457	TGGATAAACTCGGATCAAGA	576	twist_733	CATCATGTTACGGAGTACCG	9
twist_866	CATGATCTTGCCAATAAGGA	576	twist_2306	TAAGACCCTATTCTTTAAGG	9
twist_3011	CTGCCTCGCTACAAATAAAA	575	twist_1946	ACGCAAATCTTGTAATGAAG	9
twist_2447	CCTATTAGATTACAGATCCG	575	twist_234	CCACCTAGCTACGTGTCACA	9
twist_4087	TCACCAAATCTAGATAAAAG	575	twist_513	ACACTTTAACTTGAGTAGCA	9
twist_2103	CCATCACATACCCTTACACG	575	twist_269	TCGGCCCTTATCGCGAGACA	9
twist_4190	CCTAATCTCTCCTTTTCGAG	575	twist_430	CCTATACCTTAGGCTCAGCA	9
twist_1605	CAATTGAGCACTTAACGGAA	574	twist_3453	GCTCTGCGATAATAAATAAG	9
twist_1573	CGAACGTGATTTTTTCCCAG	574	twist_315	CCAGATTTATGACCTCGGAG	9
twist_2916	CTATCCCAAGTTGATTTACG	574	twist_2307	CTATTTTTTTAATATTAAGG	9
twist_1932	TAAAGCACCTACGATCTACA	574	twist_1208	CTTGTAATTGCCTAAACCGA	9
twist_427	AAGTTCACAACGTTACCACA	574	twist_141	TATTCAAATATACTTCCGCA	9
twist_1528	CCTCGTCACAGCCCGAACCA	574	twist_1932	TAAAGCACCTACGATCTACA	9
twist_3235	TAGGGCCCTGCGGTAATCGA	574	twist_2228	CTTTCACTCAATAAATCCAG	9
twist_4164	CCGACGTATAGAACTCCCAA	574	twist_439	CGAAGACTCTTCTAAAACAG	9
twist_1009	GCATGTTTACTAATAACGGA	573	twist_2925	CCGCTAACCCATATGCTCCG	9
twist_1524	AGTGGGTTCATGTTGTCACG	573	twist_2927	GCTCCCATAGGCAAGTCACA	9
twist_3131	AGGGGTGGCCAGTTATGCAG	573	twist_1021	CATGTCGAACCGATTCCCGG	9
twist_1973	CTGTGGATCCAATTTCTACG	573	twist_2930	AATCCAGGCATAGCAAGGGG	9
twist_565	GCACCTTTTCTATTTTGGCA	573	twist_781	ACTCCTCTCGGTACAAGAAA	9
twist_1955	CTATATCGTGAACCTACAGA	573	twist_876	CTGCGCCAACAAACGAAAGG	9
twist_1296	CTGTACCTCGACAATATGCA	573	twist_735	CAACATCCCGCCTTGTCGCG	9
twist_2246	CATCCTCGTATCCTGTAAGA	573	twist_2129	TTAGGGAAATACACACTACA	9
twist_1920	CATCTCTGATGACCGTTCAG	573	twist_3547	CAGTTCCAAATAGAATAACA	9
twist_3680	CCTACAATTGCTTCTTGGCA	572	twist_1807	CTACCCCTCAATATAAGAAG	9
twist_77	CGGCATTCTCTGGAGTTACG	572	twist_2801	CATTGCCCCTTACTGTTCAA	9
twist_3084	CTGAAATTTACATAACACGG	572	twist_4027	CAATCTCGTAAGTAACCCCA	9
twist_3816	CCTATGCCACTCTTGTTGGA	572	twist_3711	GGTTAGATCTTGGCGCTGGG	9
twist_3000	TGTGCAGGACCAGAGCCACA	572	twist_1867	CAACGTGCAAACGAGACGAG	9
twist_3841	ATGTCAGGCGGACCAAGCAA	572	twist_3179	AGACATAAAACCAATTCCGA	9
twist_666	CGTAATAAAAGGTTATTCGG	571	twist_1775	TGATAACGATACGCGTGAAG	9
twist_2889	GGACCTGAAAGTAAAACCCA	571	twist_1840	GGAGGTTGAGCCTCGAGAAA	9
twist_3077	GGACCTAAAAGTGAAACCCA	571	twist_2655	CGATGACAAAAAGATCTCCG	9
twist_2464	CATACAATTGCTCCTTGGCA	571	twist_2482	CAATCTATTTTACCAATACG	9
twist_1135	CGGGACGTTTCAATATTGCA	571	twist_225	CCGCGCTGAATAGTGCCAAA	9
twist_243	TGTCGTTGAGACATATGGCA	571	twist_950	ACTCCTTGTATCTTTAAACG	9
twist_1690	CCTCCCCCCACCTTTCAACG	571	twist_2816	CTATCGGCAGTCCATTTACA	9
twist_3564	GGATGGTAACCTGAATTAAA	571	twist_3431	CTGAATAAAGAATAAAGACA	9
twist_777	AAGCGTATAAGCGTGAGGAA	570	twist_3040	CTATCTCCCTCTTAAACACA	9
twist_685	AATCACTTTGCACCGCAACA	570	twist_2937	CCGTTCTTTAATGCTCGCAG	9
twist_1331	ATACGGGTAATGACTCACAA	570	twist_2664	TATATTAATACCATATAGAG	9
twist_1710	CCTGCCACAAACCAATGCAA	570	twist_1155	CCGTAGACCTGACTACTACG	9
twist_3488	ACATACTTAAACGTACTCAA	570	twist_2543	GCTAGCCCCTACAAAACGCA	9
twist_1764	CTTCGAATAATACTATACAA	570	twist_3553	AAACAGGTACCCAAGCAGAA	9
twist_1801	ATGCCGTACAGTATGACACA	570	twist_2824	CTAATACTTAGGAAGCAGAG	9
twist_1534	CGACTGTATTAACTGACAGG	570	twist_1971	GAGAGCTTTGTAACAATCAA	9
twist_160	GCACATGACCGTCATTCGAG	570	twist_1575	CCACATTCCGCAGAGATAAA	9
twist_1540	CTAGTAGGCTAGCCATCGAA	570	twist_4115	TCGCCTCACTGCCATTCGCA	9
twist_4119	GATGAGGACCTATCGACAGG	570	twist_2623	TATATTGATACAATATAGAG	9
twist_2880	TCACCATATCTAGATAAAGG	570	twist_4143	CTTCTGTACGCCTTATAACG	9
twist_4133	GAGGATAAAGCAGTTAACAA	570	twist_2099	CAATATACCAGAACTTACCA	9
twist_1652	ACACTGCTACTGAAGCTAAA	570	twist_548	CATATGTTACTGACATGAGG	9
twist_108	TGATAAAGCAGGGCACTCAA	570	twist_475	TAGAGCTCTCTCTCACTAAG	9
twist_1817	GTACGGGATAACTTAACCAG	569	twist_1370	CAAAAGTGAATCCCGACCGG	9
twist_2027	TCAACGGTAACTCCAATCCA	569	twist_1458	TATGAACCCAACGTTACACG	9
twist_2910	AATTTGGACAGGTAGTTGAG	569	twist_1794	GGATCCTGAGTCCTTATCGG	9
twist_2656	AAGGCCCAACCCTCACGCAG	568	twist_533	CATTTCCAAGGCGAAACCAG	9
twist_3017	CCACTACCCGTGTTTTACGG	568	twist_4197	CCTACCAGTAATACGTAGAG	9
twist_783	CTGTTACCTCCGAAATGCAG	568	twist_484	CTTAAATGCATCGAAAACCG	9
twist_2788	ATGGCACTACCACAATCAGA	568	twist_3144	CTTGGGCAACGTTTGTTCGA	9
twist_2808	CTACCCTCCAACAAGAAAGA	568	twist_3508	AATCGAAACTAGGCAACACA	9
twist_4053	CATATAGACTACAATTAAAA	568	twist_4216	CAGTACCACAAACAATCCCA	9
twist_1455	CTGACCTCTTAACCTAAACA	568	twist_2182	GGTTACATCTCCACTAACGG	9
twist_3238	CGTTACACCCCTTTATCGCG	568	twist_1313	GGTCGACAATCTTTACACCA	9
twist_2268	CCTTATAAATACTAACCACG	568	twist_3644	CGAGCCTCTGTCGAAAAGGG	9
twist_1081	CTATAGTAACGTCTACAAGA	567	twist_1797	CCGGTATGAAAGTAGTCCGA	9
twist_167	CTGGCCCCCAAATCAATCCA	567	twist_1922	GTAGTACCTAAATCTTGACA	8
twist_1166	CTTTGGATCAACGAACTGAA	567	twist_45	TGGGGCCCTCTATTGCCGAG	8
twist_824	CGTTACCCCCCTTTATCGCG	567	twist_1511	CTTATGTGAGGGTATAAAGG	8
twist_945	TGAGCCCATTAACCTCCGGA	566	twist_3021	TAACAGGGAAGGTCATCCGA	8
PDE8B_2114	AGTAATTGAGAGATACAAGG	566	twist_3029	AGTACTAAAGATATATCAAG	8
twist_2981	CCATTGAACCTCCCTCCGGG	566	twist_633	TCTCCCAATACTAATATAGA	8
twist_894	CAGCTCATTTCTGTTTAGAG	566	twist_808	ACATGATACCCTTCTTGCGG	8
twist_1878	CTGCCCCTAATCGTGCAGGG	565	twist_1006	AATCGAAACTAGGCGACACA	8
twist_3536	CCTCTCGCAAGCCATCTCAA	565	twist_2186	TTTAGATAACCCTATATGAG	8
twist_1299	CCTCCACGTAGGCAACACGG	565	twist_2566	CAAACCTGCTCTGCGTGACA	8
twist_3634	CGAACTCTCCCGGTATAGCG	565	twist_1899	AGGCATTTAGCAATTTAACA	8
twist_3837	AGGATAACAGATCTACTGAA	565	twist_2534	CTGGACACTGTATTACCGGA	8
twist_1738	CTTAAACTTTGGATTCGCAA	564	twist_3732	CAAGGGAAAGAACATTTCGA	8
twist_3761	GGACAAAGATGGTTTATGAG	564	twist_2056	AAAGGGGATGCCGAATTAAA	8
twist_1240	CTTAAGGTCACCCTGTAAAA	564	twist_1656	GGTCATGAATCTTTACCGAA	8
twist_61	ACGCCGCTTCTACCAAGACG	564	twist_2689	CGGACTCGATAACAGAGGCG	8
twist_3387	CTGCGGTCTCCCCAACTGGG	564	twist_1620	AGGGACAGCTCCGAATCAGG	8
twist_3441	CTGCCTGACCGGTCTCCCCA	564	twist_646	TCATGGTTACTTGCTTAACA	8
twist_1989	GATCCGAGCCGTACTTTGAG	564	twist_388	AGACTACCCTGAAATTCACA	8
twist_1249	CATCCTGCATCCGATCCGCA	564	twist_844	GGACTATCAGCAAAGTTCAG	8
twist_1260	CTGAGTAACCACACGTGCCA	564	twist_3076	GCACTCGTAACGGCGTTAAA	8
twist_1658	CCTCGTCAAGCATCTTTAGG	564	twist_2661	ACTTAACCTAAATTGATACA	8
twist_426	CTTAAAACATGTGCTACGAA	564	twist_69	CTATACACATCGTCTATAGG	8
twist_3612	CGATGCTAAGCCCAGTGAGA	564	twist_1796	TTATTGTCTTTTTCTCAAGA	8
twist_197	ATGAACGCCGCAGCTAGCCA	564	twist_3019	TAACAGGGAAGGGCTTCCGA	8
twist_2853	CAGATATCCAGTTCACACAG	563	twist_3832	CCTCCACATCACCCTTTAGA	8
twist_1	GCACTTGTAACGGCGTTAAA	563	twist_740	CTACTTAACCTACCGCCACA	8
twist_3309	CGATGCTAAGCGCTGTGAGA	563	twist_1688	GCAGATTCTTCTACAAGACA	8
twist_1474	TGGGAACCCTTGAATTTCGA	563	twist_4203	CCAAAGAGAATCATACAGAA	8
twist_1983	GATCGACATGCCCCGCTAGG	563	twist_1292	TGTGCTTCAGTAATGTCCCA	8
twist_403	TAGGTCCGTGCGGATCTCCA	563	twist_3865	ACTGCAAACGATATACCGGG	8
twist_868	CGTGACCCTTCATCGCGCCA	563	twist_3409	CGTACCTATATACCTTTAAG	8
twist_3691	CCGAAGGCAGTGCAGCCCAG	562	twist_1614	CAGCCAGGCACCCTGACCCA	8
twist_3875	AAGGCTAACGTCGAGTCAAG	562	twist_1975	CTAACCCACAAGGCACTAGA	8
twist_647	CCTATCGTTCGAGCGTAGCA	562	twist_3419	TGGACCTTTGTGTATTCGAA	8
twist_3928	AAACTGCACAGACAACGCCG	562	twist_2519	AGGATCAGCTTACTAAGGAG	8
twist_156	CCATCAGTCCCGTCGATAAA	562	twist_3135	CGAAATCTCCCGGTATAACG	8
twist_2064	CTACGTTCTCACAATCAAAG	562	twist_2785	AAAGGGATAGTGCTGCTCAA	8
twist_2834	CTGACTGCCCGGTCTCCCCA	562	twist_1463	GTGTATATCCTGATGCAGAA	8
twist_2559	CCTAATCACTACTTTTCGAG	561	twist_1673	AATCAAGCAGCTCTTCGGGG	8
twist_1592	CTAACCGCAATCCTGTAAAG	561	twist_3146	AGTCACACATTTACGCCAGA	8
twist_3961	CAGATGATTACCCCGAGGAA	561	twist_2111	GCAGACCTTTGATCTTTAAG	8
twist_1421	CGGGACAACGCCATGAAAGA	561	twist_1013	TCAAGAAATTATCAGAACAG	8
twist_2945	ACTAGCAGTAACACGCAGAA	561	twist_3965	ACTAGAAGTAACCCGCAGAA	8
twist_2708	CGAGCCTCCCATAAGTCCCG	561	twist_1632	CATAGGCACGCTCCTATAGG	8
twist_220	CTTCATGAACTTAAATCACA	561	twist_1438	GAACAGCACTTCCCTACCCA	8
twist_956	GCGATAGGCCATCTGAAAAG	561	twist_2682	CCTATAAGATTACAGATCCG	8
twist_1131	CCTTACGACTACCTTTCACG	561	twist_3149	TTAGTGCATATGTATTGACA	8
twist_3205	GCACCTATAGGCAAGTCACA	560	twist_502	GGTAATTTAGAGGCGTACCG	8
twist_1564	CTTCAACCACACATACGCAA	560	twist_3156	AATATTGATACCATATAGAG	8
twist_3134	CATAGACCCTTACTGTTCAA	560	twist_2938	CCAAGAAACCGTGTGCCAAG	8
twist_1046	CCTCGAGCATTTATGAACGA	560	twist_328	ACTGTAAACGATATACCGGG	8
twist_2429	CTTAAATGCATCAAAAACCG	560	twist_3500	TTTTGTCACGAGGTACTCGG	8
twist_2255	CTTTACAAATAGCAGAAGAA	560	twist_195	CGTCAGGCCAGAAAGACGAG	8
twist_3175	CTGCCTTGCTACAAATGAAA	560	twist_3992	CCGTCCTACGCGCCTTTCGA	8
twist_3735	GATAGGTCTATTAAGTCGAG	559	twist_1707	GAACTGCATGCGACGACCGG	8
twist_1718	CGATTCCGCGAAACACCCCG	559	twist_3511	CATTTCCATAAAGTTCACAA	8
twist_2928	GAAAAGAGCATTGTATTAAA	559	twist_1866	TCTGCGATTTCCGAAAGAGA	8
twist_376	CTGATGATTACCCCGAGGAA	559	twist_1019	CTTCACGATACTCTGTCAGA	8
twist_3724	CGGGCTCCATTCGCGCTCCA	559	twist_476	GGACGGACTGCATTATAACG	8
twist_1925	GATAGGTCTATCAAGTCGAG	559	twist_1203	CCATCTAATTCGCCTCGACA	8
twist_1501	CGGGCTTTACGAGAACGAAG	559	twist_1301	CTGAAAACTAGATAGACGGG	8
twist_3049	CGTGACAGCAGCGTACTAAA	559	twist_3207	TCTTCTCCCATGACTTACAG	8
twist_760	ACGTTGAAAAGGACGCTCCA	558	twist_2436	CCTTTCTCACTTCCTCGACA	8
twist_3751	CGACACAATTTAGCTACAGA	558	twist_53	CTAGACATTACGTCGACCCG	8
twist_751	GGGTTGCCCAAGCCGCACGA	558	twist_3546	TAACAGAAATTATTAAGACG	8
twist_2254	ACTTTACATAAATTGATACA	558	twist_229	TAACAAGGAACGCTTCCGGG	8
twist_576	GGACAAAGATGTTTTATGAG	557	twist_3380	CGATGCTAAGCCCTGTGAGG	8
twist_1818	CTTCGAGGCCCCAAAACGAA	557	twist_2297	ACTTTACCTAAATTAATACA	8
twist_3606	AGGGGCGGCCAGTTATGCGG	557	twist_129	CCAGTATGTTCTCCTAAGAG	8
twist_3200	CGATGACAAATCGATCTCCG	557	twist_3223	GCTGGTTTACCGTAGCTAAG	8
twist_3542	CAGCTTTATTACCTTTTGGA	557	twist_271	CCTGTATAAAGTCCGATCAA	8
twist_482	CTTCAGCGCCACACATTCCA	557	twist_4118	GAACTCGCCTAACAACCGAA	8
twist_4219	CTACTCCTTGCTGAAACAAA	557	twist_2826	AGAAACCATTTAATTCACCA	8
twist_3790	CTAGTAGCCCCCCCTCGCGA	556	twist_1937	AAAAATAGTAAGCAGACGGG	8
twist_2244	CAATACAATTTAGCTACAGA	556	twist_3571	CCGTTAGTATAAGAAAAGGG	8
twist_519	GGGGCCGGATTGGCAATAGA	556	twist_2831	CCTCTAGTTCTAACAATAAA	8
twist_1095	CAAACTCCTTCCATACCACA	556	twist_4017	AAGGATAAAGCAGTTTACAA	8
twist_1213	CTATCACCCAGTCCGTTACG	556	twist_1519	AATTGTCGTAAAGCAACGGA	8
twist_4010	CTAAACAATTACCATTTCGG	556	twist_4175	CGGTGGCCTCCGACTTGAAG	8
twist_115	CGGGTCCATATTCCAACGGG	556	twist_3611	CGAAGTGAACGGTCTAGAGG	8
twist_3285	AATTACACACCACAATTAAA	555	twist_1036	CAACGGGTCTCTACATACCA	8
twist_1314	CATATTACAGATTTAATCCG	555	twist_1837	TGTCTTTTCTCTCAATCCCG	8
twist_3830	CATACTTGTTGAACGTTGAG	555	twist_2997	TAAGAATCCCTCCTAATGAA	8
twist_1546	CCTTCGGTAGGTGAAACAAG	555	twist_4193	CCGCATACATAATTTCTAGA	8
twist_862	CTAGCATCCCGGACTTCCAA	555	twist_2039	ACAGGCTCACACTTTCAACG	8
twist_1598	CCTGCTTCACATGTACAAAG	555	twist_297	AGTAAAGCTTCGAAATCCGG	8
twist_2635	CCGGAACCCATTCATCAAGG	554	twist_1077	CGTGTCCGATATAAAAACGA	8
twist_3487	CAATGCCTTACCATGTTAGG	554	twist_117	TTAACCTGTGTGTAGCCGAG	8
twist_2839	CGTTGATCAGAAAAGCTAGA	554	twist_714	GGTACCTCACCGCCTTTACG	8
twist_4051	CCTACTCATCAATTTCACCA	553	twist_433	GGTTCTAGTGAACCGAGAGG	8
twist_417	CTTGGTCACCGGTCGCTGCG	553	twist_2444	GTACACAAACCGGTATACGG	7
twist_3083	CCGGTTAAAGCATCAAAAAG	553	twist_1806	CGGACCTAAGATTCACCCCA	7
twist_1414	ACACATGTCTAATTACAACA	553	twist_1192	CAAGAGCTACAATAAACGAG	7
twist_670	CGGCTTCTATATGTAAGAAA	552	twist_3848	GCAACCATAGGCAAGTCACA	7
twist_2296	CTATATGAATAACAGCGCGA	552	twist_176	CTTGCTTGTCGCGTTTAAAA	7
twist_4036	TGGGGCCCTCTATCGCCGAG	552	twist_2856	GGGTTCTACCACTTGACAAG	7
twist_2280	CAATGTTTCATTAATTGCAG	552	twist_2493	CAACTCAGATCCGCAATGCA	7
twist_975	TGGCTTCAAATGGATAGAAA	552	twist_3498	CTTTTTCCCTTACTGATGAA	7
twist_4162	AGAGACCATTTAATTCCCCA	552	twist_3699	CTTTTATACTATCTTAGGAG	7
twist_1006	AATCGAAACTAGGCGACACA	551	twist_1510	CTTTACATCTACCAGTCGAG	7
twist_3219	ATGGACCGTTAACCTCTGCG	551	twist_772	ACGCGGCCCAGGATGTTGCG	7
twist_1092	CTACTCCAAATTATTTAACA	551	twist_331	GAGGGGAACCCCGTGCACAA	7
twist_2585	CTAGCCTAAACCTAGCCGAA	551	twist_1818	CTTCGAGGCCCCAAAACGAA	7
twist_1505	CTTATACCTACACAAAAAGA	551	twist_208	AGACCCTACTGTGAGTAAGG	7
twist_2952	CTTGCACCACTACATTAAAG	551	twist_1889	GTAGACAACCGCGCTTAGGA	7
twist_1849	CCGTTACTCTTGGTGCACAA	550	twist_2353	ACACTTGGCAGGTATATGAA	7
twist_2351	CCTGACATCCTCACATCCGG	550	twist_857	CTATTGACAGACTAATCCGA	7
twist_2162	AGACGGTCCGGGCCTTGAAA	550	twist_1833	TTGAAGAAAACCACGCTGAG	7
twist_1833	TTGAAGAAAACCACGCTGAG	550	twist_3070	CCAGGCACCCGGTATACACG	7
twist_3762	AAGCGTATAAGCGTGAGGGA	550	twist_1884	CATAGAGACTACAATTAAAA	7
twist_3452	CCTTAGGCAGGGCTTCTGAA	550	twist_3766	GCTGGTCACATTCATATCCA	7
twist_4006	CCTACCCCACCAAAATCCCA	550	twist_177	AAATCAAGAACTTAACAAAA	7
twist_2067	CTAATGACCGCGACTTACAA	550	twist_983	CGAGCCTCTGTCGAAAAAGG	7
twist_2259	CAACTTCCTGACGTTTTACA	550	AOC3_2148	TGTTGCTTCTACAAGCACCG	7
twist_4178	CCTGCCAACCATATACGCCG	550	twist_2090	GGATAACTAAAAGCACACAG	7
twist_767	CGATGTATTCACACTAAGGG	549	twist_1101	GCAGACCTACGCCAAACACG	7
twist_127	ACACAGTCATGCTCTCAGGA	549	twist_658	CTATCCCAAGTTGATCTACG	7
twist_79	CCTCGTGAAGAACCAATACG	549	twist_2575	TAGGGCCCTTCGTTAATCGA	7
twist_3662	GCGCCCATAGGCAAGTCACA	549	twist_126	AAGAATAGCCTATAGCGAAG	7
twist_549	TGTCCGACCAACGATTAAGG	549	twist_1405	CCATGCTCCGCTATTCACAG	7
twist_4114	CTTAAGCCACGTTTGTTCGA	549	twist_2891	TCGCGCTAAAATAATAAAGG	7
twist_3653	CAATTGACCAACTTGCAGGA	548	twist_2581	GGATGTCTTCGAATTTCAAG	7
twist_113	CAATGGCTTACCATGTTAGG	548	twist_941	ACAGGACGTTGTTAATACAA	7
twist_494	TTGCAGACATGAAATATCGA	548	twist_4161	CTTAACACCAAGAAATTAAG	7
twist_2815	CGATACAATATAGCTACAGA	548	twist_2010	CCTCGGCATCATGTAAAAGA	7
twist_3122	TAACGCACTAACTCTCACCA	548	twist_2225	CAATCTTGTTAGTAACCCCA	7
twist_2944	CTAATGATTACCCCGAGGAA	548	twist_2904	CTGAAATTACCATAACACGG	7
twist_3921	CGGAGCCCCCACCATTCAAA	548	twist_673	TTGTTATTAATCCTACTAAG	7
twist_2715	TGGGGCACTCTATTGCCGAG	548	twist_167	CTGGCCCCCAAATCAATCCA	7
twist_991	CCTTCAACCGCATTACCAAA	548	twist_127	ACACAGTCATGCTCTCAGGA	7
twist_4102	AATGATCTAGGGACTATGGG	548	twist_3877	CGATGGGCCCGGTTTTGGGG	7
twist_416	CTTACCGTTTAATCGCTGCA	548	twist_3400	AGATGCCAAGTCCTTTGCAA	7
twist_4017	AAGGATAAAGCAGTTTACAA	548	twist_3401	GGTAGTGCTGATTCACGGGA	7
twist_2068	CGACTACATACATTTACACG	547	twist_2160	CATGATAAACGTGATCACAG	7
twist_2117	GCAATACGACTCCCACAAGG	547	twist_2032	CGGAGTCACAGGGCACCACG	7
twist_1378	GTGGTGTGTGGGACTCAGGG	547	twist_2036	CTACATTCACGTCCTATCCA	7
twist_3511	CATTTCCATAAAGTTCACAA	547	twist_3775	TTAGCGGATTCTCTATTGGG	7
twist_3585	CCTCTATTACTGTCACCGAA	547	twist_2277	CAAAAAGACACACAGCGCAG	7
twist_3415	CAAATCGGAAGATAAATCCA	547	twist_1990	CGTAGTTCTAAGGAAACAGG	7
twist_3716	AGGGCTAACGTCAAGTCAAG	546	twist_2112	AGATAGGGCAGGGTTTTACA	7
twist_1913	AGACTACCCTAAAATTCACA	546	twist_3785	AGAGAAAACCTACCACACCA	7
twist_1828	GCGAGCTTCGACTCTTTGAA	546	twist_2469	ATGGACCGTTTACATCTGCG	7
twist_1441	CTAATAATAATTAATCAGCA	546	twist_2380	TTTTGTCACAAGGTACTCAG	7
twist_2869	GCTACGGATTTTCAATAAAG	546	twist_3153	ATAGGCCAAGTCATTCCGGG	7
twist_1348	TGGTATGCATGACAATCCGA	546	twist_206	CATAACCCAGGAATAAAAGA	7
twist_2843	CATCCAATCTTTAAATTCAG	545	twist_1421	CGGGACAACGCCATGAAAGA	7
twist_3337	CCTCAAGCATTTATGAACGA	545	twist_1781	ATAGTGCATCCAGTTAGCAA	7
twist_2663	CTGGCCCCCAAATCAATACA	545	twist_818	ACTTAGTCTTTCCTGTACGA	7
twist_2779	CTGTTGCACGTGGAGTACAA	545	twist_3477	CAAACACATGGATAGACGAA	7
twist_2365	CATACGATCTTTAAATTCAG	545	twist_2609	TCAAGGCAAATTTAAACAAA	7
twist_2864	ACTCGAGACTGTGTTCTAAA	545	twist_3490	GTTACGAGCCAAGTTTACGA	7
twist_1842	CCGTCGAAATTTACTCAACG	545	twist_626	TAAAGACCCATACAACCCGG	7
twist_971	CTGTCAAGTTAAATACTAGG	544	twist_4013	TGGGGCTCTCTATTGCCGAG	7
twist_2753	CTATAGACAGACCCTTAACA	544	twist_84	GTAGTTCGATCAGCTCGACG	7
twist_2388	TAACAGATACCACTTTCCAG	544	twist_2483	AGTATATTATCGTCTACGGA	7
twist_958	TGGGATAACGCAACTAACGG	544	twist_1069	CATTACGTAGTTAAGATGCA	7
twist_4040	AGAGTTACACGACCACAGGA	544	twist_307	CCAGCTAATACACATACAGG	7
twist_3413	CTGATCAGCTTACTAAGGAG	543	twist_1334	ATGACATTTTGGGTAATACG	7
twist_2523	CCAATTGGAAGATAAATCCA	543	twist_7	ACTACACTCTATCCGACCAG	7
twist_4072	AATAAATATGTCACAACAGA	543	twist_164	CCGCGCCGACACTAACACAA	7
twist_1384	CTGCCCGGCGGCCAGATCAG	543	twist_515	ACAACTCCTTTCCTGATACG	7
twist_1613	ATTAACACCTTGATGACGAA	543	twist_4209	TAGGGAGGCCCTGTGCGAGA	7
twist_903	CCAAGAAACCGTGTGCCGAG	542	twist_3189	CTTGATACTTTCAAAAAAAG	7
twist_817	CTTAGCCACGTTGCATTACG	542	twist_2047	CTGTCCAACCTTAAAAGCAA	7
twist_1625	CGGTGTCCACTCTTTCCAAG	542	twist_1183	CCTTCCAAAGGCTCACCAGG	7
twist_3358	CTTGGGCGACGTTTGTTCGA	542	twist_3193	AAAATCCGAGATATTCGACG	7
twist_191	ACAGACAACCGTACTTGAAG	542	twist_1027	ATGGGGCTTGTCGCAACGGG	7
twist_2009	CTGTAATAACAGAAACTCCG	542	twist_2594	CTTAACCAATAGCAGAAGAA	7
twist_1349	GAGAGCTCACCTTCTCCCAG	542	twist_1831	CAACTCTCTTCCGTACACCA	7
twist_785	GCGTTGCAAGTTGATTTACG	542	twist_4073	TCGCGGTCTGCTCCAATCAG	7
twist_2516	TGTGCAGGACCAAAGCCCCA	542	twist_70	AGGATCCCATCATTTTTCAA	7
twist_2841	AGTAAAAACCTACCACACCA	542	twist_1054	TGACCACGACAACCTAGCAG	7
twist_800	TAAAGCTAAATACTATGAGG	541	twist_2040	CTGTATCTTATCGCATAACA	7
twist_1172	TGGGCGGAACACTTATGACG	541	twist_1536	TCAACTGGAATCGTATGACA	7
twist_2156	CTAGCCTTAACCTAGCCAAA	541	twist_435	CAGCTAATCAGCATAACACA	7
twist_3758	CTATAGGGACTGGAGTGCAG	541	twist_2832	ACTACACTCTATCCTACCAG	7
twist_704	CCTAACTGTAAAATTAAAAG	541	twist_2833	CTGTTGCTCGAGGAGTACAA	7
twist_3882	CCAGAGTGCTAATAAACACA	541	twist_2726	CGATACTTTATATTGAAAAG	7
twist_1905	CATATATTCCAATCGTACGA	541	twist_920	GAAAAGTTCCCCTAACCCCA	7
twist_2574	CGTCGATTAGAAAAGCTAGA	541	twist_607	GCGACTACCAGGCCAAAGCG	7
twist_2179	CTAGACATTACGTCGCCCCG	541	twist_1723	CATAGCCCTCGACCTTCACA	7
twist_552	GCATCTGCCCCCTCGCTGCA	540	twist_3628	CTGATGTATTAGAAGCCCAG	7
twist_3755	GGGTGTCGCTTCACTTTACA	540	twist_3526	CGGAGTGTAATTTATTACAG	7
twist_860	AATGCTCTAGGGACTATGGG	540	twist_508	CTTGGAGACAGTGCGATCCG	7
twist_2463	CTACTAGATTTGCTTTTGGA	540	twist_3840	CATCTAAGAACCATGTTACA	7
twist_810	CTACTACTTGTACCATGACA	540	twist_4225	AAGGGCCAAACCGTTTAAAA	7
twist_593	TAATGAACCCCAATACCGAA	540	twist_438	AGTTCTCCATACCAGAGCGA	7
twist_228	CTGTCCACAAAGGCACACCA	540	twist_350	TGATTGACACCTTAGTAAAG	6
twist_123	CTGCCTGCCCGGTCTCCCCA	540	twist_3855	AGGATCTCATCATTTTTCAA	6
twist_1327	CTGACGTGTGCACTGTGGCA	540	twist_616	CCTTCACGACCTTAACTACA	6
twist_935	CTAGCCCTAGATCAACTCCG	540	twist_1186	AAGTGATATCTGTCACTGGG	6
twist_2728	CGAACTACATCCTAACCAAG	540	twist_1190	CATGTGTCCCAGTCTCCCCA	6
twist_2998	CAAATATGCACAACTATACA	540	twist_971	CTGTCAAGTTAAATACTAGG	6
twist_2891	TCGCGCTAAAATAATAAAGG	539	twist_3870	TTTGGCGACAGCCTTACCCG	6
twist_2510	CCTATCAGATTACAGATACG	539	twist_2237	CTACTTAGCTTCGCGTCCAA	6
[truncated: 2,234 more rows]
