# Supplementary figures and images for: Circular synthesized CRISPR/Cas gRNAs for functional interrogations in the coding and noncoding genome
Source: eLife journal article supplement (doi:10.7554/elife.42549), 2019-03-06

Supplementary Figure 8, Wegner et al.

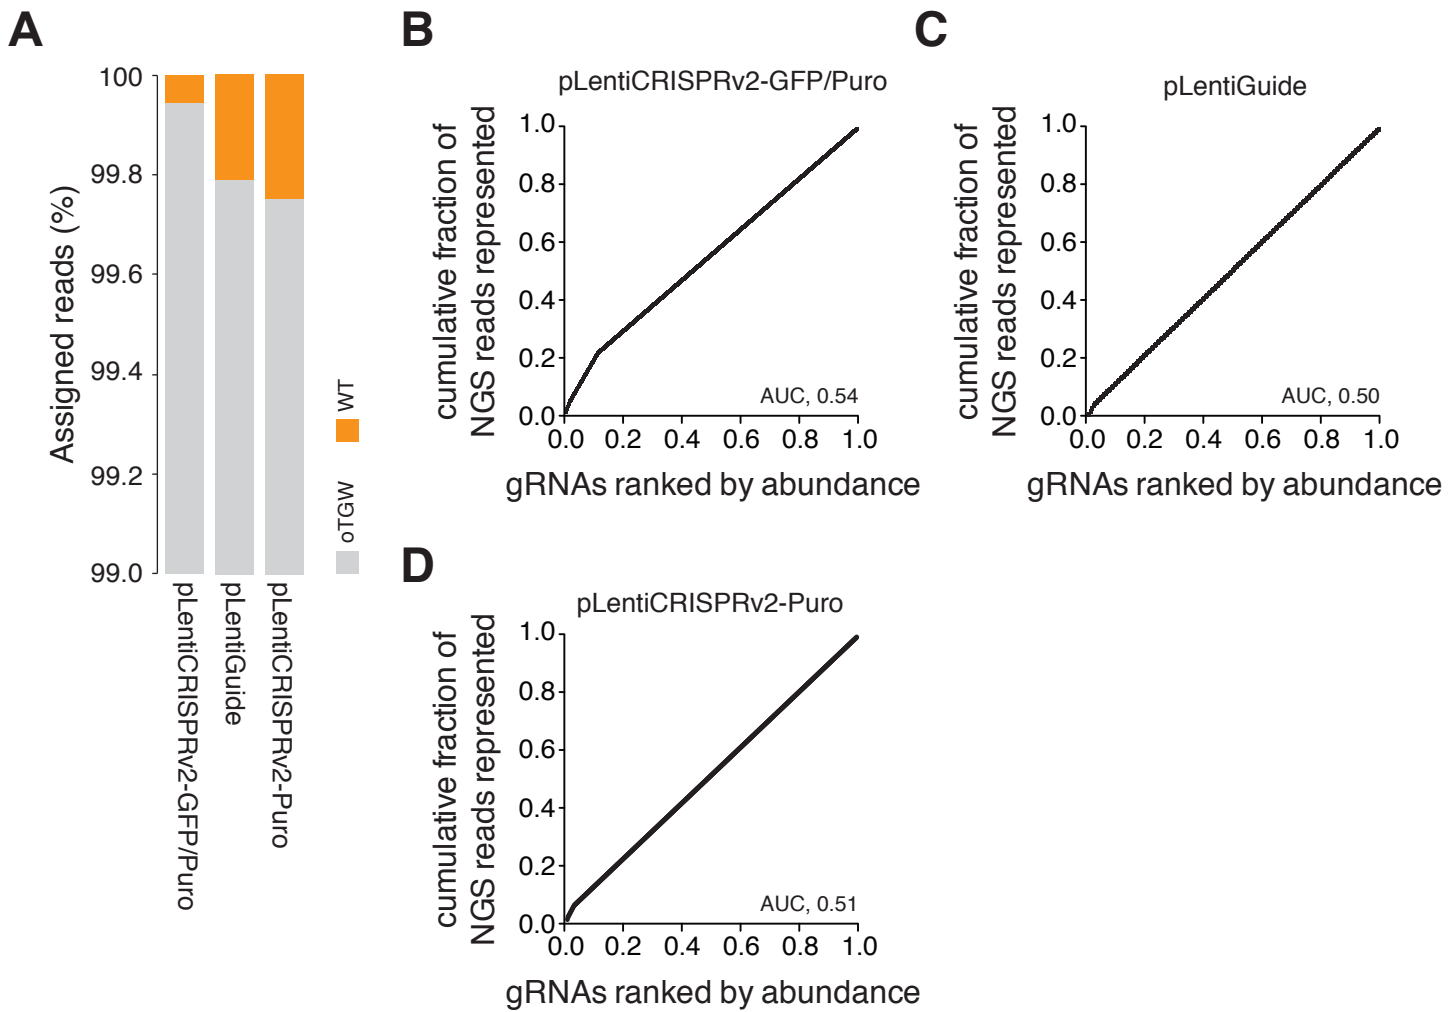

Supplement: supp [file elife-42549-supp-v1.zip]

Supplementary Figure 7, Wegner et al.

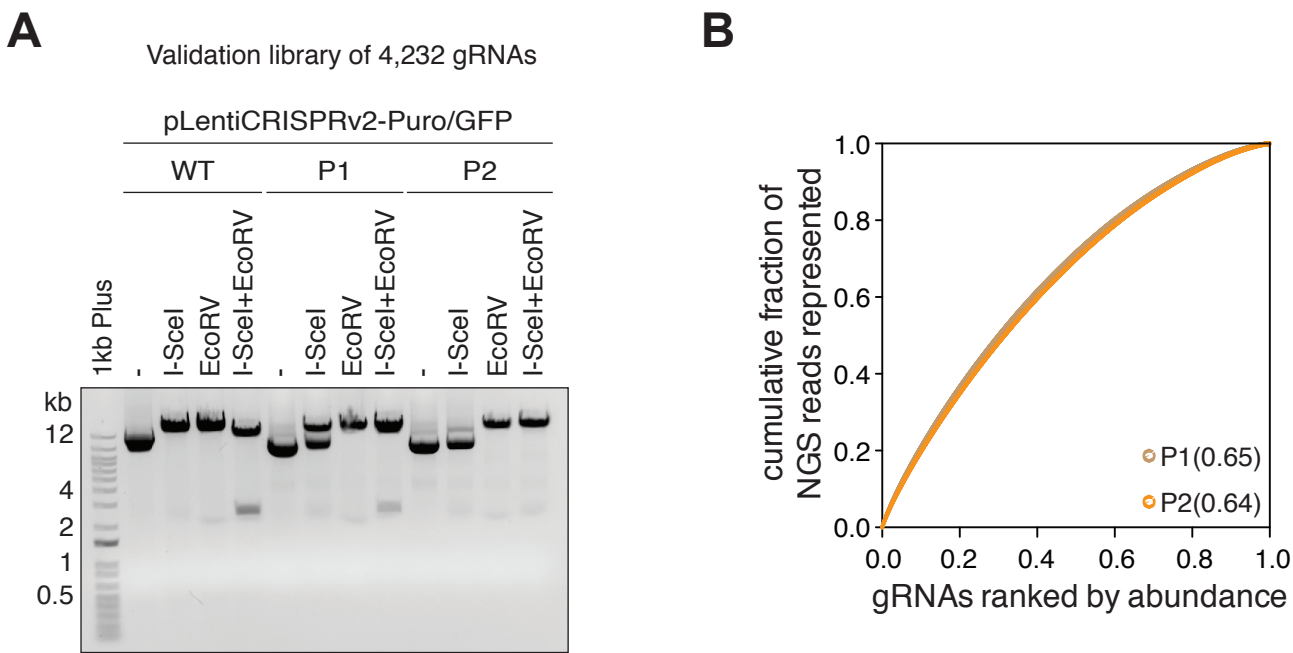

Supplement: supp [file elife-42549-supp-v1.zip]

Supplementary Figure 6, Wegner et al.

A

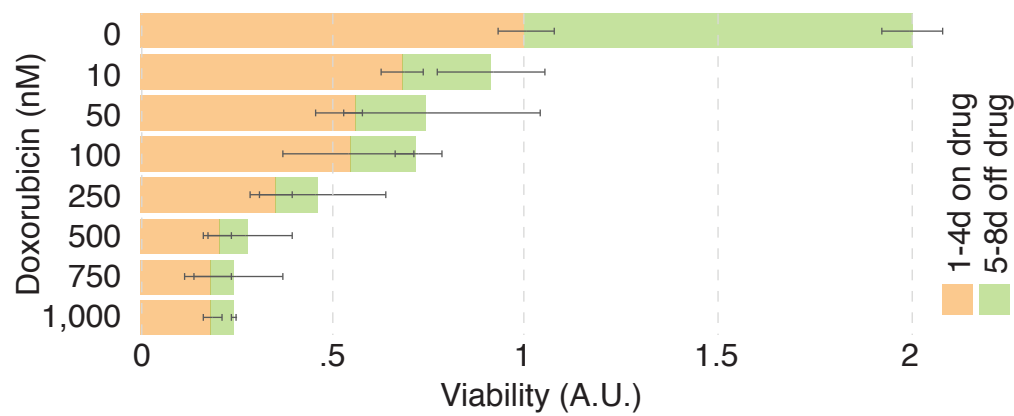

B

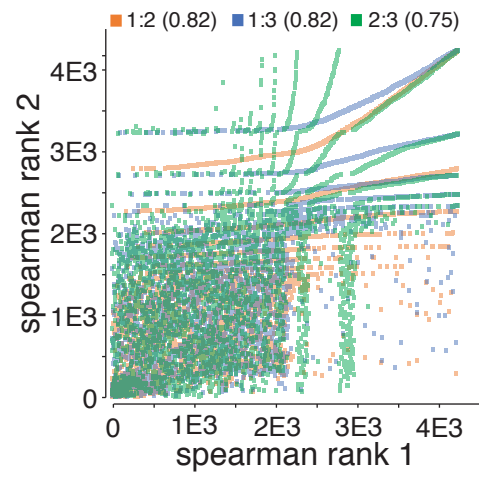

Supplement: supp [file elife-42549-supp-v1.zip]

Supplementary Figure 4, Wegner et al.

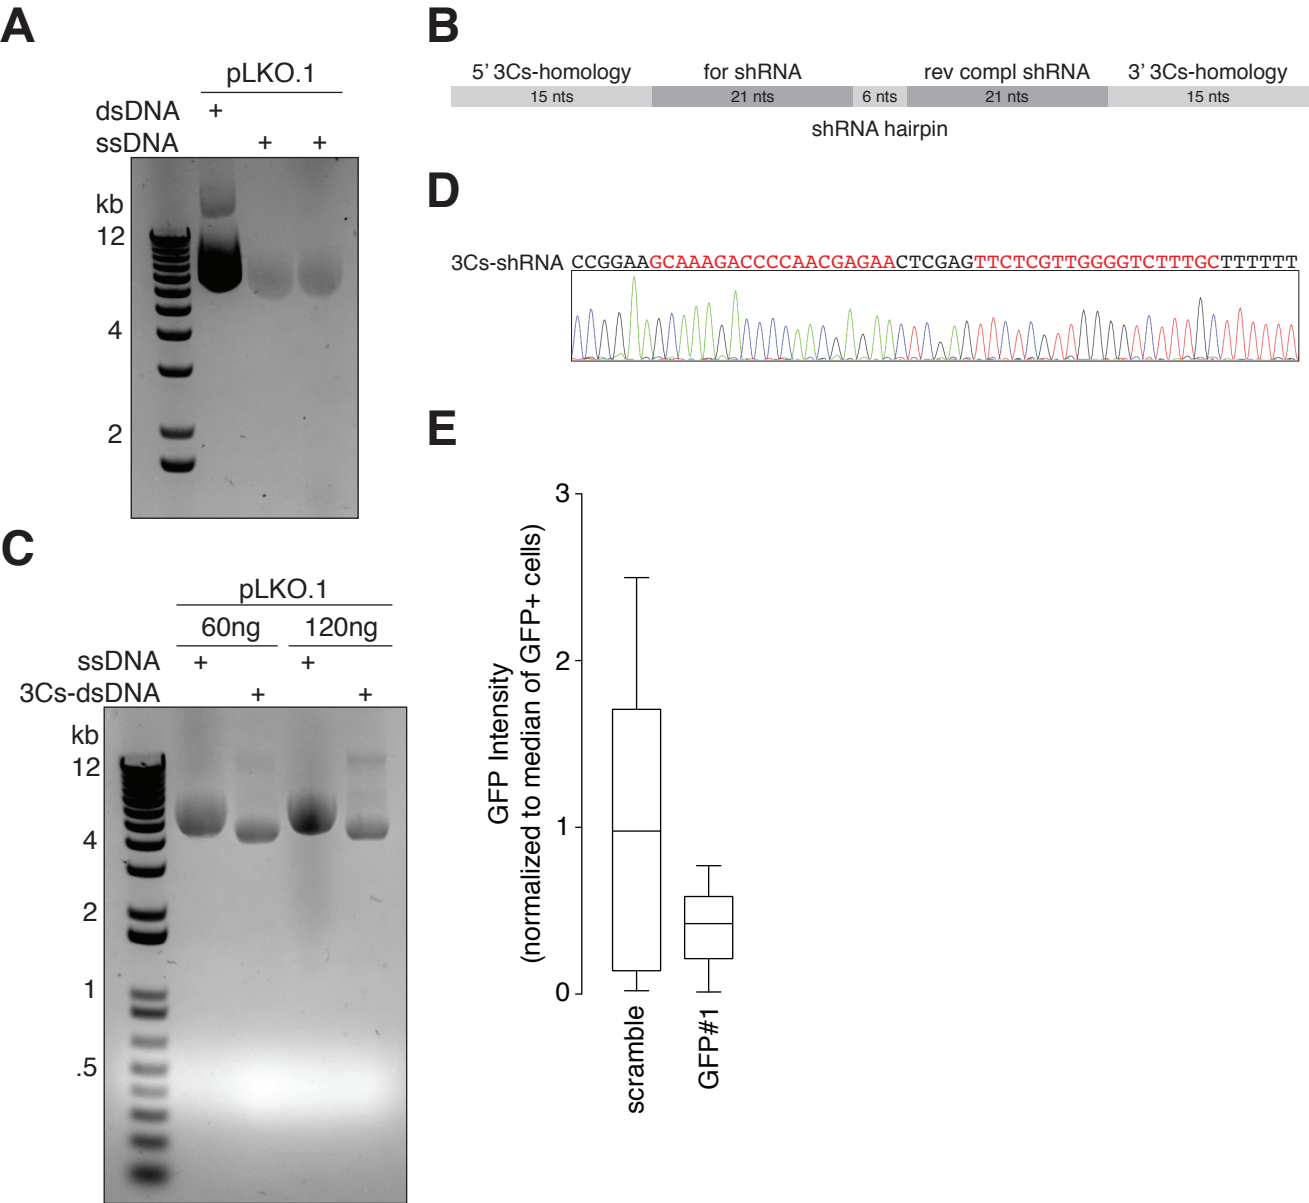

Supplement: supp [file elife-42549-supp-v1.zip]

Supplementary Figure 1, Wegner et al.

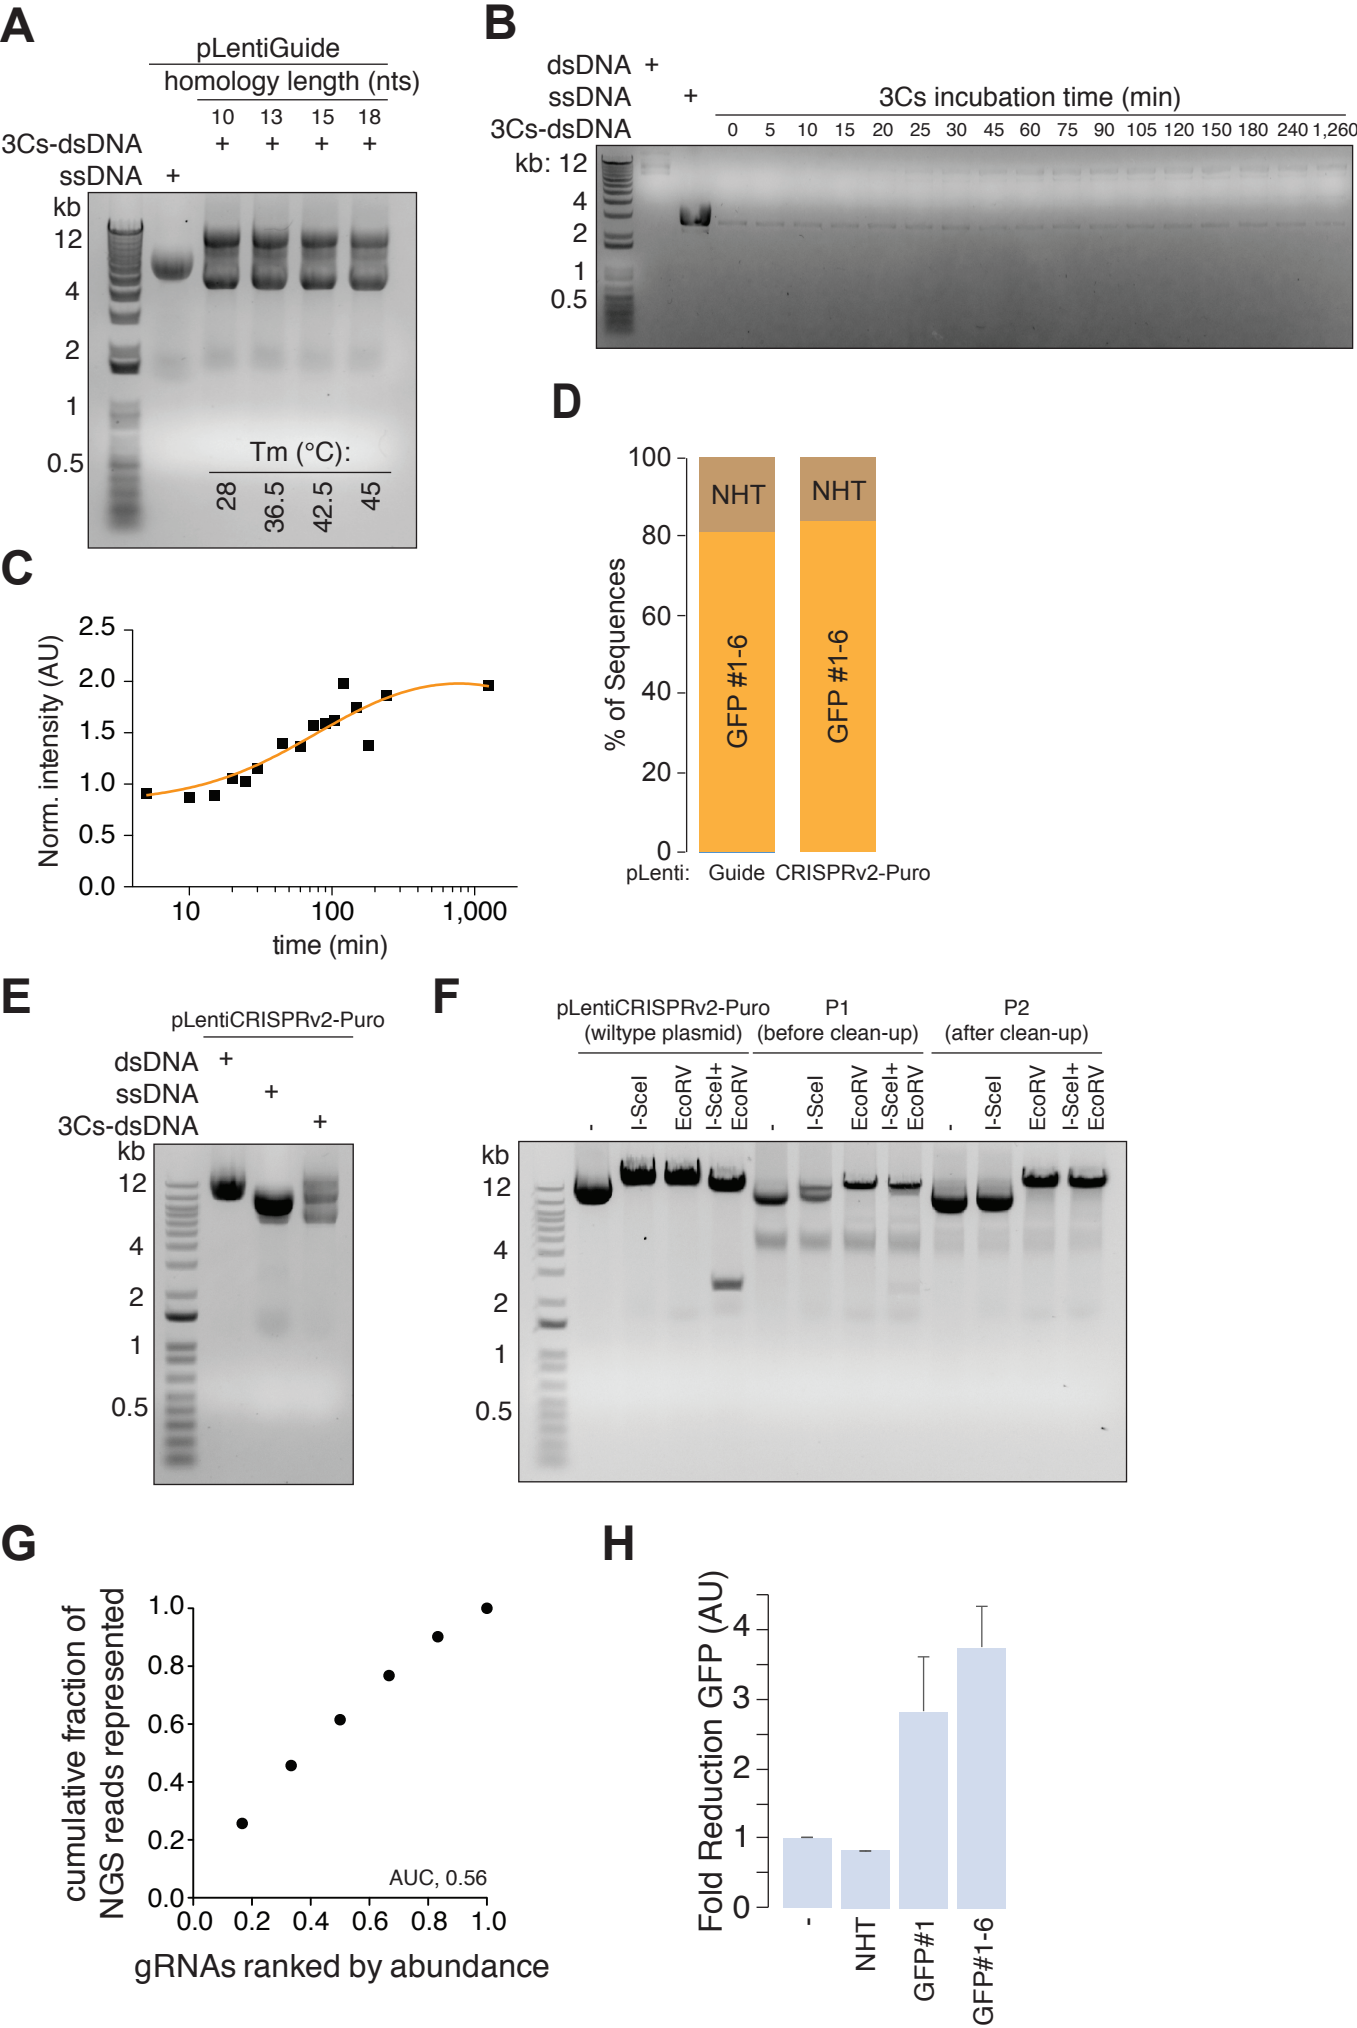

Supplement: supp [file elife-42549-supp-v1.zip]

Supplementary Figure 3, Wegner et al.

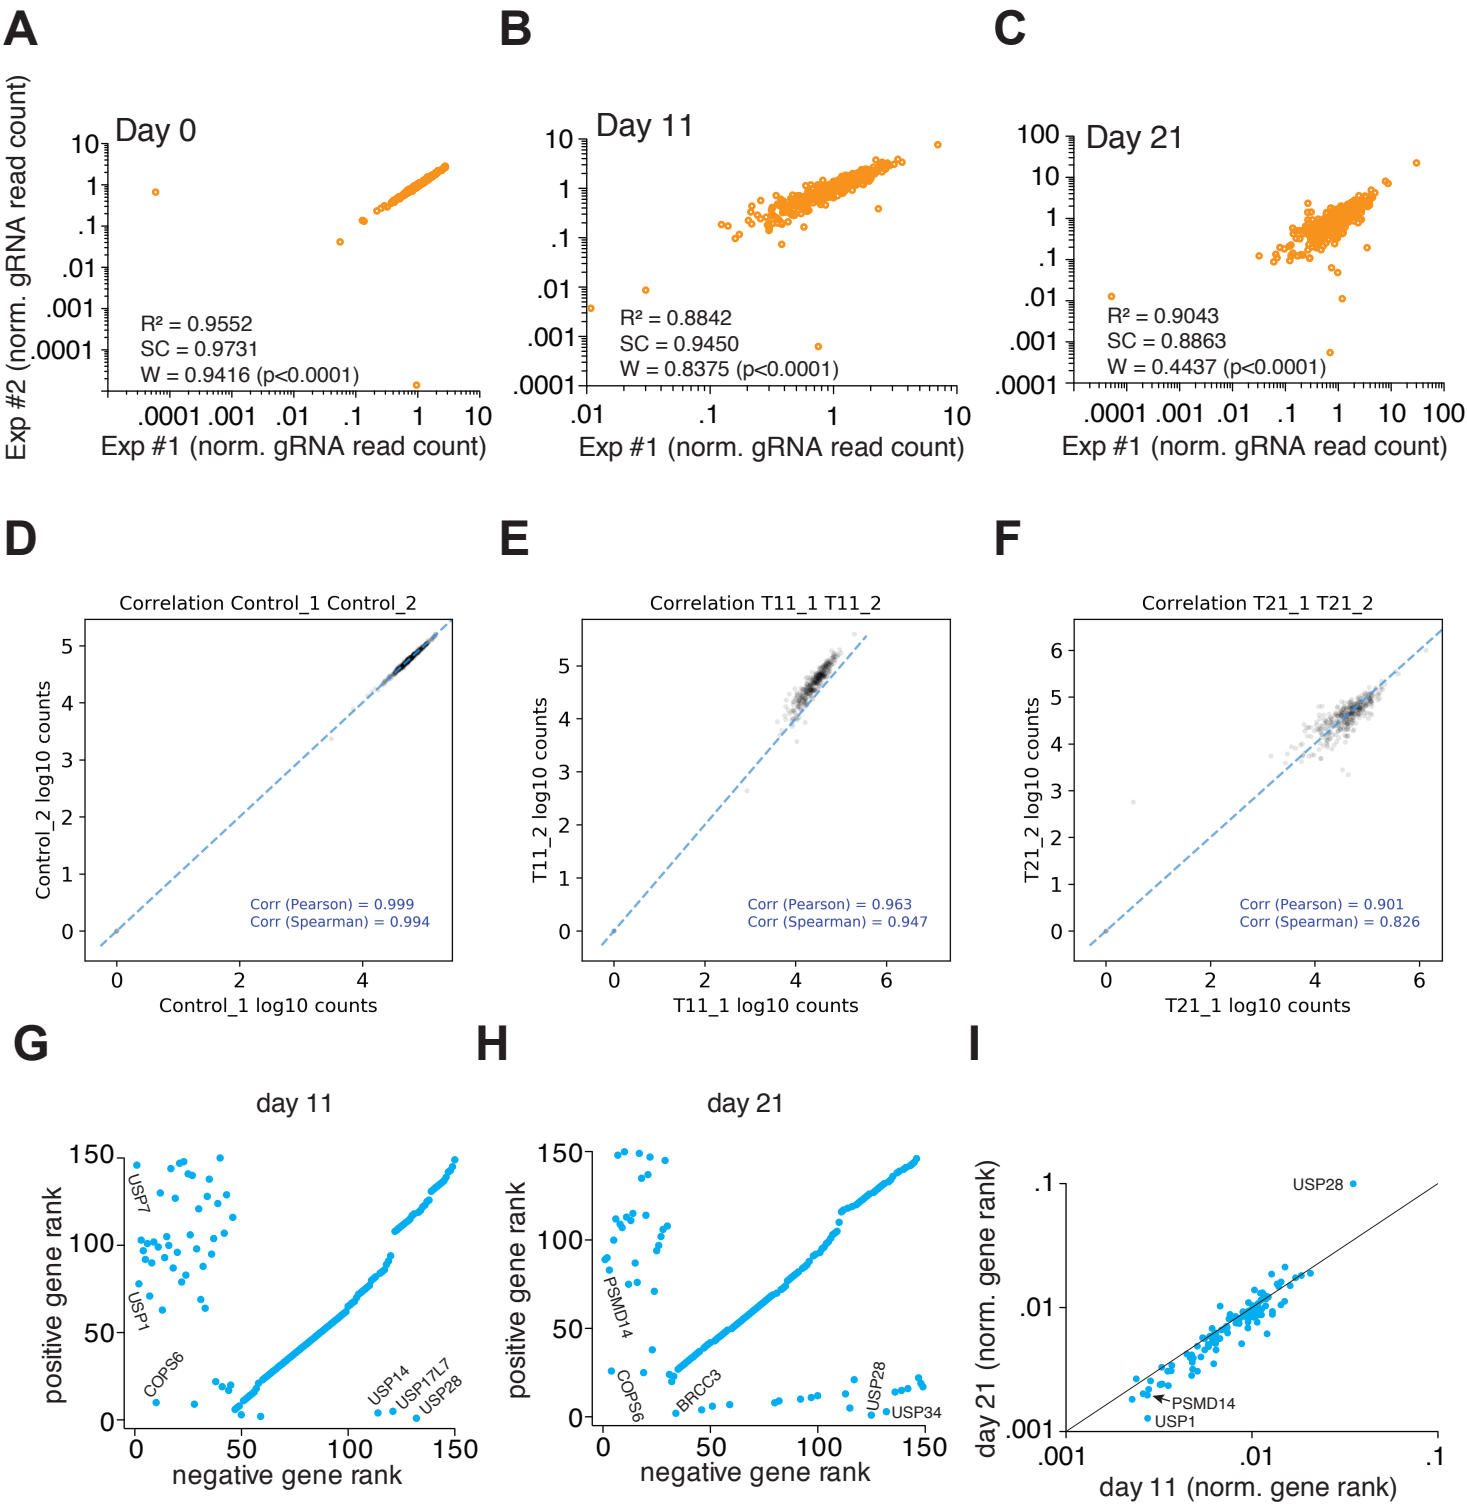

Supplement: supp [file elife-42549-supp-v1.zip]

Supplementary Figure 5, Wegner et al.

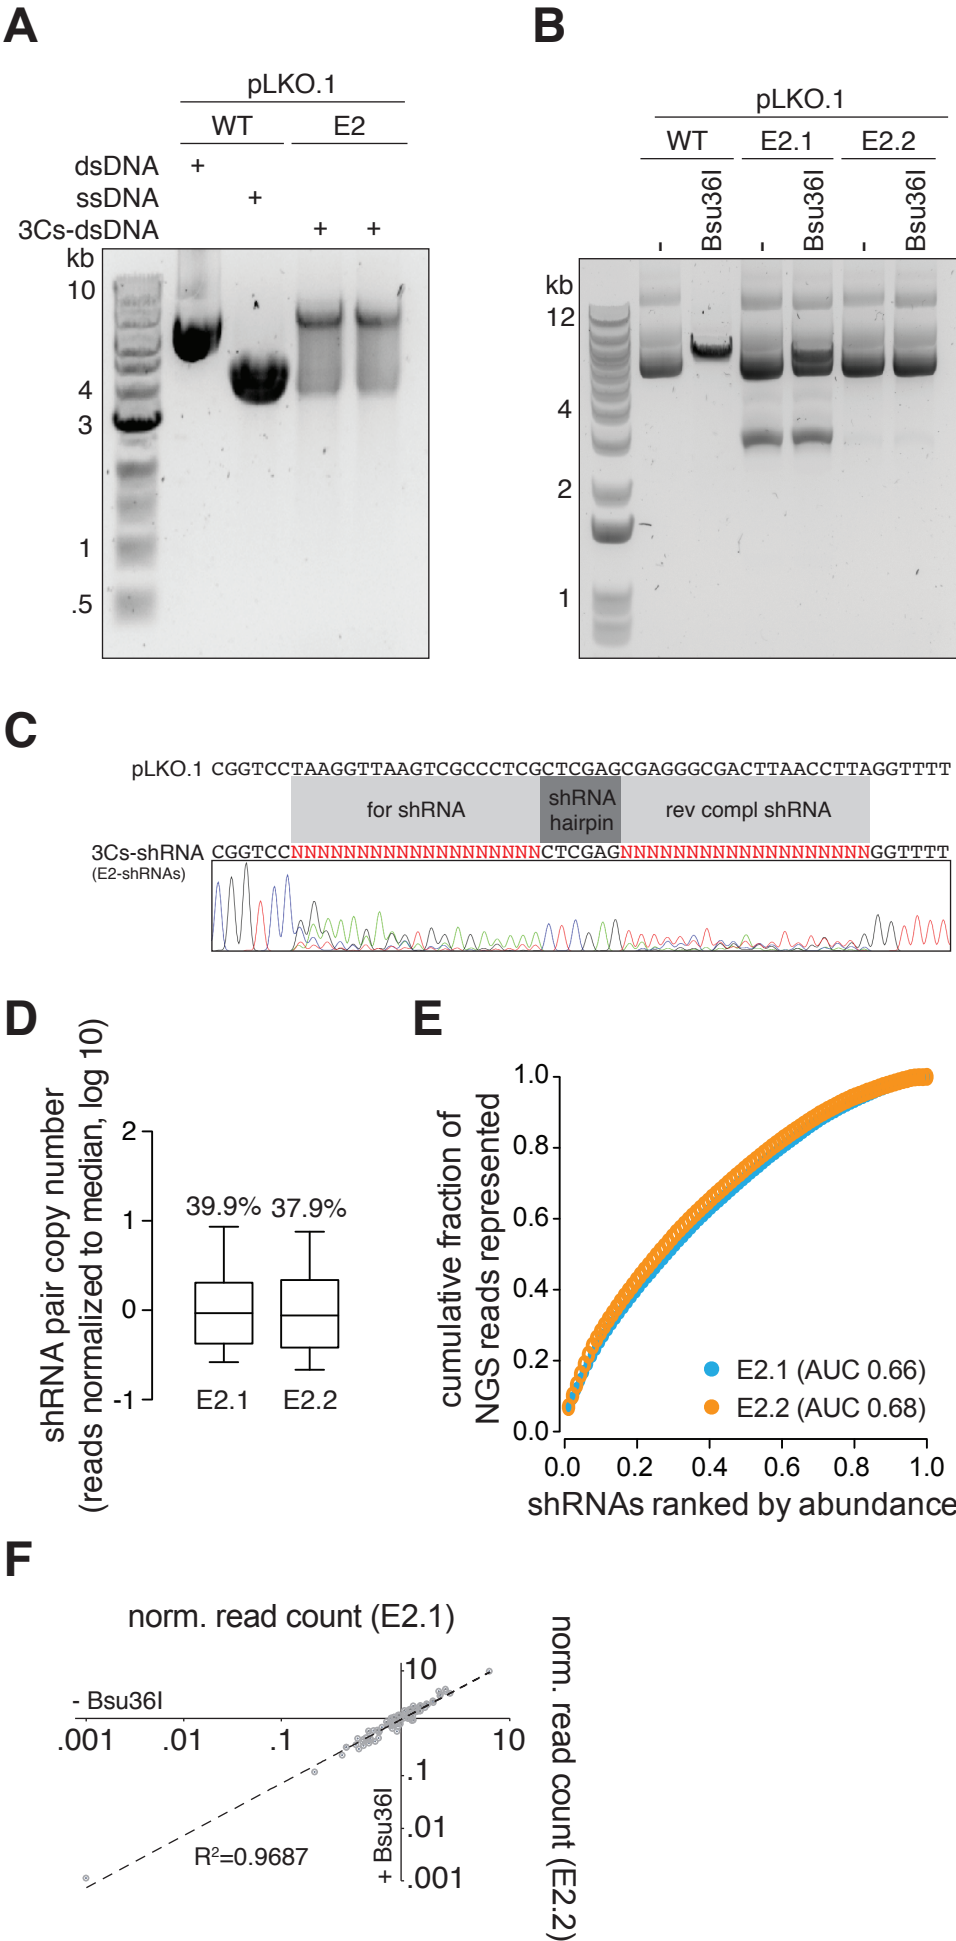

Supplement: supp [file elife-42549-supp-v1.zip]

Supplementary Figure 2, Wegner et al.

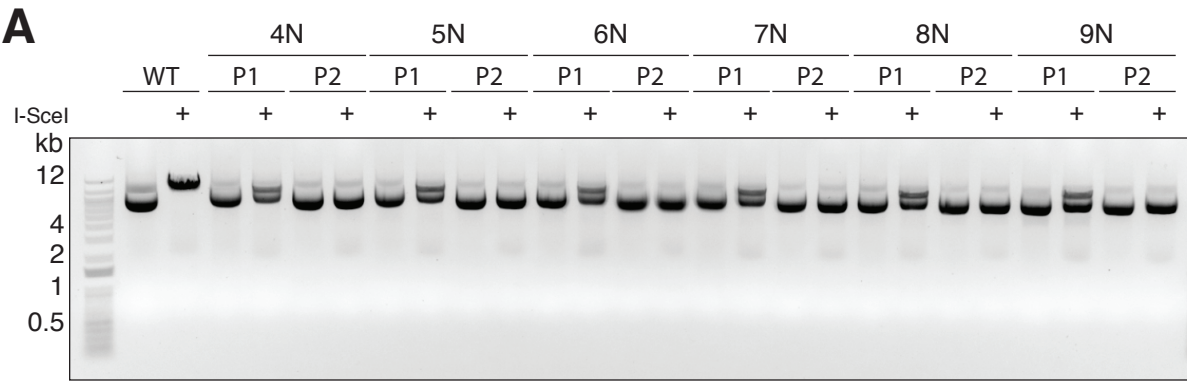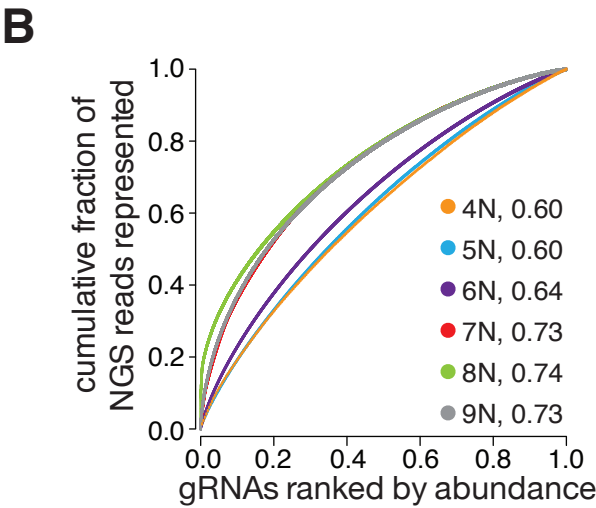

Supplement: supp [file elife-42549-supp-v1.zip › elife_poa_e42549_Figure_2_figure_supplement_1.pdf]
